# Supplementary material for: Multi-omics integration identifies key upstream regulators of pathomechanisms in hypertrophic cardiomyopathy due to truncating MYBPC3 mutations
Source: Clin Epigenetics. 2021 Mar 23;13:61. doi: 10.1186/s13148-021-01043-3 (PMC7989210; doi:10.1186/s13148-021-01043-3)
Supplement: Supplementary file 9 — Additional file 9: Table S1 An overview of the clinical characteristics in all cardiac samples [file 13148_2021_1043_MOESM9_ESM.xlsx]

## Sheet: Supplementary Table 1
Group	Sample ID	H3K27acChIP-seq inclusion	RNA-seq inclusion	Proteomics inclusion	Gender	Age	Cardiac region	Mutations	LAD (mm)	IVS (mm)	IVSi	EDD (mm)	ESD (mm)	FS (%)	E/A ratio	E/e' ratio	TR velocity (cm/s)	Diastolic dysfunction stage (1-4)	LVOTO (mmHg)
Patient	HCM_1	+	+	+	M	32	Septum	MYBPC3 c.2373insG	47	23	13	43	16	63	1.03	14.2	NA	2	64
	HCM_2	+	+	+	M	60	Septum	MYBPC3 c.2373insG	52	23	NA	45	29	36	2	14.5	NA	3	77
	HCM_3	+	+	-	M	17	Septum	MYBPC3 c.2373insG	NA	NA	NA	NA	NA	NA	NA	NA	NA	NA	NA
	HCM_4	+	+	+	M	33	Septum	MYBPC3 c.2373insG	33	24	13	40	25	38	1.08	8.9	NA	1	31
	HCM_5	+	+	+	M	27	Septum	MYBPC3 c.2373insG	39	24	13	37	19	49	1.42	14	2.33	1	61
	HCM_6	+	+	+	F	24	Septum	MYBPC3 c.2827C>T	44	24	14	35	16	54	1.12	18.9	2.5	2	34
	HCM_7	+	+	+	M	33	Septum	MYBPC3 c.2827C>T	40	21	12	46	20	57	2.38	19.5	NA	3	25
	HCM_8	+	+	+	M	49	Septum	MYBPC3 c.2827C>T	47	16	7	44	29	34	0.78	10.2	2.3	1	9
	HCM_9	+	+	+	F	21	Septum	MYBPC3 c.2827C>T; c.2434G>A	43	45	28	40	NA	NA	1.26	23.1	2.29	2	27
	HCM_10	+	+	+	F	53	Septum	MYBPC3 c.2827C>T	NA	NA	NA	NA	NA	NA	NA	NA	NA	NA	NA
	HCM_11	+	+	+	M	53	Septum	MYBPC3 c.2827C>T	43	21	10	47			0.64	13.5	2.15	1	41
	HCM_12	+	+	-	M	48	Septum	MYBPC3 c.927-2A>G	NA	NA	NA	NA	NA	NA	NA	NA	NA	NA	NA
	HCM_13	+	+	+	M	22	Septum	MYBPC3 c.927-2A>G	NA	NA	NA	NA	NA	NA	NA	NA	NA	NA	NA
Healthy control	Control_1	+	+	-	F	NA	Septum	NA	NA	NA	NA	NA	NA	NA	NA	NA	NA	NA	NA
	Control_2	+	+	-	M	NA	Septum	NA	NA	NA	NA	NA	NA	NA	NA	NA	NA	NA	NA
	Control_3	+	+	-	F	NA	Septum	NA	NA	NA	NA	NA	NA	NA	NA	NA	NA	NA	NA
	Control_4	+	+	-	M	50	Left ventricule	NA	NA	NA	NA	NA	NA	NA	NA	NA	NA	NA	NA
	Control_5	+	+	-	M	NA	Left ventricule	NA	NA	NA	NA	NA	NA	NA	NA	NA	NA	NA	NA
	Control_6	+	+	-	F	61	Left ventricule	NA	NA	NA	NA	NA	NA	NA	NA	NA	NA	NA	NA
	Control_7	+	+	-	M	46	Left ventricule	NA	NA	NA	NA	NA	NA	NA	NA	NA	NA	NA	NA
	Control_8	+	+	-	F	56	Left ventricule	NA	NA	NA	NA	NA	NA	NA	NA	NA	NA	NA	NA
	Control_9	+	+	-	F	59	Left ventricule	NA	NA	NA	NA	NA	NA	NA	NA	NA	NA	NA	NA
	Control_10	+	+	-	M	46	Left ventricule	NA	NA	NA	NA	NA	NA	NA	NA	NA	NA	NA	NA
	Control_11	-	-	+	F	50	Septum	NA	NA	NA	NA	NA	NA	NA	NA	NA	NA	NA	NA
	Control_12	-	-	+	F	55	Septum	NA	NA	NA	NA	NA	NA	NA	NA	NA	NA	NA	NA
	Control_13	-	-	+	M	37	Septum	NA	NA	NA	NA	NA	NA	NA	NA	NA	NA	NA	NA
	Control_14	-	-	+	F	48	Septum	NA	NA	NA	NA	NA	NA	NA	NA	NA	NA	NA	NA
	Control_15	-	-	+	F	42	Septum	NA	NA	NA	NA	NA	NA	NA	NA	NA	NA	NA	NA
	Control_16	-	-	+	M	33	Septum	NA	NA	NA	NA	NA	NA	NA	NA	NA	NA	NA	NA
	Control_17	-	-	+	M	40	Septum	NA	NA	NA	NA	NA	NA	NA	NA	NA	NA	NA	NA
	Control_18	-	-	+	F	62	Septum	NA	NA	NA	NA	NA	NA	NA	NA	NA	NA	NA	NA
+: sample included in the analysis
-: sample not included in the analysis
LAD: left atrial diameter
IVS: interventricular septum thickness
IVSi: indexed interventricular septum thickness corrected for body surface area
EDD: enddiastolic diameter
ESD: endsystolic diameter
FS: fractional shortening
LVOTO: the systolic left ventricular outflow tract obstruction gradient
NA: data not available
