# Supplementary material for: Multi-omics integration identifies key upstream regulators of pathomechanisms in hypertrophic cardiomyopathy due to truncating MYBPC3 mutations
Source: Clin Epigenetics. 2021 Mar 23;13:61. doi: 10.1186/s13148-021-01043-3 (PMC7989210; doi:10.1186/s13148-021-01043-3)
Supplement: Supplementary file 11 — Additional file 11: Table S3 (A) Differentially expressed genes between HCM and control hearts from the RNA-seq data. (B) Enriched GO terms and pathways by up-regulated genes in HCM versus control hearts. (C) Enriched GO terms and pathways by down-regulated genes in HCM versus control hearts [file 13148_2021_1043_MOESM11_ESM.xlsx]

## Sheet: Supplementary Table 3A
Gene ID	Gene symbol	log2(FC)	P-adj
ENSG00000179542	SLITRK4	3.42707	2.98094e-23
ENSG00000120049	KCNIP2	-3.87529	6.56023e-21
ENSG00000197616	MYH6	-2.91904	1.70305e-17
ENSG00000227051	C14orf132	2.37821	5.11515e-17
ENSG00000081791	DELE1	1.04661	1.8762e-14
ENSG00000103316	CRYM	1.86237	3.41889e-14
ENSG00000100095	SEZ6L	3.06662	1.02432e-12
ENSG00000185761	ADAMTSL5	1.47019	1.19327e-12
ENSG00000126803	HSPA2	1.80332	1.24386e-12
ENSG00000213694	S1PR3	-1.89937	2.31638e-12
ENSG00000115163	CENPA	3.27018	1.37964e-11
ENSG00000133794	ARNTL	-2.2045	1.77234e-11
ENSG00000152767	FARP1	1.62274	2.21072e-11
ENSG00000114279	FGF12	-2.35302	2.8031e-11
ENSG00000154277	UCHL1	2.33694	2.92109e-11
ENSG00000154096	THY1	2.15462	3.9165e-11
ENSG00000246985	SOCS2-AS1	2.28478	3.9165e-11
ENSG00000111452	ADGRD1	-1.81764	7.99987e-11
ENSG00000150281	CTF1	1.44298	6.77486e-10
ENSG00000170439	METTL7B	-2.32912	1.36529e-09
ENSG00000156471	PTDSS1	-1.50748	1.41161e-09
ENSG00000081803	CADPS2	-1.67935	1.45179e-09
ENSG00000016391	CHDH	-2.20981	2.17081e-09
ENSG00000073670	ADAM11	-2.57102	2.96156e-09
ENSG00000100100	PIK3IP1	1.12868	3.10628e-09
ENSG00000106483	SFRP4	2.34628	3.10628e-09
ENSG00000064201	TSPAN32	1.21551	3.23507e-09
ENSG00000184838	PRR16	1.23117	5.00143e-09
ENSG00000135454	B4GALNT1	1.51113	7.18264e-09
ENSG00000174437	ATP2A2	-1.46678	7.18264e-09
ENSG00000007908	SELE	-2.53068	1.32191e-08
ENSG00000100206	DMC1	2.40428	1.44608e-08
ENSG00000184557	SOCS3	-2.31652	1.47446e-08
ENSG00000142748	FCN3	-2.14075	1.72872e-08
ENSG00000118298	CA14	-2.49302	2.35695e-08
ENSG00000162630	B3GALT2	-1.35433	3.19601e-08
ENSG00000158023	WDR66	2.10452	3.67858e-08
ENSG00000107968	MAP3K8	-1.61266	4.18038e-08
ENSG00000196922	ZNF252P	-1.02353	6.4893e-08
ENSG00000106236	NPTX2	-2.07418	6.7526e-08
ENSG00000008869	HEATR5B	-0.94242	6.94785e-08
ENSG00000099957	P2RX6	2.24841	1.11612e-07
ENSG00000184661	CDCA2	-1.72902	1.60269e-07
ENSG00000113448	PDE4D	-1.35129	1.62107e-07
ENSG00000228436	LOC105378663	1.64022	1.62107e-07
ENSG00000089199	CHGB	-1.85864	1.8263e-07
ENSG00000145244	CORIN	-2.5434	1.99984e-07
ENSG00000232002	LINC01880	-2.72029	1.99984e-07
ENSG00000164089	ETNPPL	-2.17705	2.25595e-07
ENSG00000111249	CUX2	2.6456	2.27744e-07
ENSG00000138795	LEF1	2.42018	2.90052e-07
ENSG00000183597	TANGO2	0.986347	3.04161e-07
ENSG00000087076	HSD17B14	1.86629	3.15593e-07
ENSG00000078725	BRINP1	2.18299	3.40721e-07
ENSG00000140557	ST8SIA2	1.60439	3.45774e-07
ENSG00000111684	LPCAT3	-1.12045	3.46662e-07
ENSG00000173598	NUDT4	-1.09302	3.65138e-07
ENSG00000198517	MAFK	1.33436	4.26477e-07
ENSG00000164532	TBX20	-1.76103	4.37504e-07
ENSG00000106631	MYL7	1.86508	5.69277e-07
ENSG00000163082	SGPP2	-2.29509	7.12419e-07
ENSG00000115290	GRB14	-1.82039	7.50786e-07
ENSG00000136003	ISCU	0.83671	7.60282e-07
ENSG00000119508	NR4A3	-2.24918	8.22489e-07
ENSG00000133874	RNF122	-1.25308	8.73821e-07
ENSG00000139410	SDSL	1.21954	8.7558e-07
ENSG00000110400	NECTIN1	-1.7706	9.44088e-07
ENSG00000134121	CHL1	-1.98149	9.44088e-07
ENSG00000137878	GCOM1	-1.74073	9.74501e-07
ENSG00000152642	GPD1L	-1.06678	1.08865e-06
ENSG00000171462	DLK2	1.88674	1.08865e-06
ENSG00000179456	ZBTB18	-1.00247	1.10512e-06
ENSG00000123689	G0S2	-1.55995	1.16808e-06
ENSG00000127954	STEAP4	-1.51994	1.16808e-06
ENSG00000160469	BRSK1	1.38849	1.16808e-06
ENSG00000168952	STXBP6	-1.39515	1.16808e-06
ENSG00000133878	DUSP26	1.1069	1.17421e-06
ENSG00000147041	SYTL5	2.04302	1.5087e-06
ENSG00000133985	TTC9	1.20587	1.57165e-06
ENSG00000112137	PHACTR1	-1.40672	1.85487e-06
ENSG00000112562	SMOC2	1.33244	2.14643e-06
ENSG00000105048	TNNT1	1.30279	2.33469e-06
ENSG00000211448	DIO2	1.14723	2.74104e-06
ENSG00000227082	LOC107985194	1.6814	2.91068e-06
ENSG00000101187	SLCO4A1	-1.51011	2.98252e-06
ENSG00000162998	FRZB	1.54175	3.00489e-06
ENSG00000198689	SLC9A6	-0.839131	3.00489e-06
ENSG00000182177	ASB18	1.54998	3.05906e-06
ENSG00000005243	COPZ2	1.22466	3.53964e-06
ENSG00000072422	RHOBTB1	0.891862	3.61945e-06
ENSG00000116396	KCNC4	1.33559	3.80605e-06
ENSG00000166033	HTRA1	0.907673	4.48259e-06
ENSG00000244734	HBB	2.35483	4.65772e-06
ENSG00000054690	PLEKHH1	-1.297	4.93621e-06
ENSG00000019505	SYT13	-1.75699	5.15809e-06
ENSG00000168734	PKIG	1.363	5.15809e-06
ENSG00000197299	BLM	-2.07631	5.45286e-06
ENSG00000008311	AASS	-1.27981	5.59751e-06
ENSG00000228812	LAMA5-AS1	2.23736	6.11911e-06
ENSG00000139438	FAM222A	-1.48034	6.16826e-06
ENSG00000109381	ELF2	-0.849594	6.2002e-06
ENSG00000164418	GRIK2	-2.0582	6.2002e-06
ENSG00000125730	C3	-2.02466	6.26345e-06
ENSG00000232480	TGFB2-AS1	2.14555	6.6398e-06
ENSG00000130234	ACE2	1.20776	6.67175e-06
ENSG00000182379	NXPH4	1.71387	6.73654e-06
ENSG00000115107	STEAP3	-1.35216	6.827e-06
ENSG00000124743	KLHL31	-1.00351	6.86796e-06
ENSG00000164591	MYOZ3	1.12849	6.88324e-06
ENSG00000250878	METTL21EP	1.70981	6.95085e-06
ENSG00000069431	ABCC9	-1.13668	7.48721e-06
ENSG00000146859	TMEM140	0.996908	7.48721e-06
ENSG00000235437	LINC01278	0.900444	7.48721e-06
ENSG00000054277	OPN3	-1.20816	7.74928e-06
ENSG00000110090	CPT1A	-1.02418	7.9147e-06
ENSG00000008394	MGST1	-1.98217	7.92392e-06
ENSG00000124713	GNMT	-2.32926	7.92392e-06
ENSG00000153132	CLGN	-1.08815	7.92392e-06
ENSG00000171766	GATM	1.54573	7.92392e-06
ENSG00000188176	SMTNL2	-1.47157	7.92392e-06
ENSG00000186231	KLHL32	-2.07829	8.58579e-06
ENSG00000181195	PENK	2.23421	8.63386e-06
ENSG00000166317	SYNPO2L	1.20573	8.8381e-06
ENSG00000163513	TGFBR2	-1.07042	9.16539e-06
ENSG00000237686	LOC101929705	1.77886	9.56935e-06
ENSG00000159387	IRX6	1.37288	9.65333e-06
ENSG00000110092	CCND1	1.09027	9.83492e-06
ENSG00000164879	CA3	2.17579	1.00863e-05
ENSG00000144959	NCEH1	-0.983434	1.04225e-05
ENSG00000019169	MARCO	-2.33284	1.14542e-05
ENSG00000118849	RARRES1	-2.09578	1.29175e-05
ENSG00000021300	PLEKHB1	1.15538	1.30501e-05
ENSG00000058091	CDK14	-0.914385	1.35373e-05
ENSG00000117305	HMGCL	0.777792	1.39115e-05
ENSG00000006534	ALDH3B1	1.02752	1.52895e-05
ENSG00000103021	CCDC113	1.26106	1.52895e-05
ENSG00000150510	FAM124A	-1.27546	1.58918e-05
ENSG00000172057	ORMDL3	0.835981	1.58918e-05
ENSG00000253368	TRNP1	0.963863	1.58918e-05
ENSG00000084674	APOB	-1.5565	1.68269e-05
ENSG00000186827	TNFRSF4	1.4505	1.69875e-05
ENSG00000175115	PACS1	1.0664	1.75659e-05
ENSG00000213190	MLLT11	1.21761	1.78725e-05
ENSG00000076555	ACACB	-1.16967	1.81947e-05
ENSG00000134333	LDHA	-1.21903	1.81947e-05
ENSG00000156535	CD109	-1.50488	1.81947e-05
ENSG00000177674	AGTRAP	0.944944	1.83058e-05
ENSG00000136869	TLR4	-1.16327	1.99921e-05
ENSG00000122574	WIPF3	0.937024	2.07987e-05
ENSG00000237624	OXCT2P1	2.20408	2.2383e-05
ENSG00000101457	DNTTIP1	0.864714	2.24407e-05
ENSG00000137054	POLR1E	0.934584	2.24407e-05
ENSG00000169291	SHE	-1.34914	2.30455e-05
ENSG00000115641	FHL2	-1.255	2.33211e-05
ENSG00000116191	RALGPS2	-1.4325	2.37112e-05
ENSG00000137507	LRRC32	-1.11223	2.37112e-05
ENSG00000139289	PHLDA1	1.40875	2.37112e-05
ENSG00000185010	F8	-1.2619	2.37112e-05
ENSG00000198785	GRIN3A	-2.11474	2.37112e-05
ENSG00000196865	NHLRC2	-0.971571	2.46125e-05
ENSG00000261115	TMEM178B	-1.55626	2.63091e-05
ENSG00000139644	TMBIM6	-0.68231	2.64224e-05
ENSG00000157214	STEAP2	-1.36521	2.72207e-05
ENSG00000139767	SRRM4	1.89869	2.80798e-05
ENSG00000125534	PPDPF	1.19954	2.91943e-05
ENSG00000100170	SLC5A1	-1.22748	3.07297e-05
ENSG00000131386	GALNT15	-1.45987	3.08762e-05
ENSG00000184588	PDE4B	-1.63337	3.2046e-05
ENSG00000123505	AMD1	-1.11035	3.22306e-05
ENSG00000075413	MARK3	-0.668163	3.24496e-05
ENSG00000164300	SERINC5	-1.51607	3.24496e-05
ENSG00000069702	TGFBR3	-1.27036	3.31528e-05
ENSG00000126878	AIF1L	-1.05954	3.49551e-05
ENSG00000111245	MYL2	1.29159	3.53039e-05
ENSG00000183615	FAM167B	-1.8035	3.68184e-05
ENSG00000174851	YIF1A	1.02353	3.7528e-05
ENSG00000235750	KIAA0040	-0.877063	3.79563e-05
ENSG00000129991	TNNI3	1.15335	3.84277e-05
ENSG00000131459	GFPT2	-1.23156	4.02265e-05
ENSG00000141441	GAREM1	-1.05617	4.02265e-05
ENSG00000172965	MIR4435-2HG	1.58252	4.04221e-05
ENSG00000113369	ARRDC3	0.964949	4.08871e-05
ENSG00000114853	ZBTB47	0.764623	4.08871e-05
ENSG00000145779	TNFAIP8	-1.57346	4.08871e-05
ENSG00000181104	F2R	1.19796	4.148e-05
ENSG00000133703	KRAS	-0.843989	4.19735e-05
ENSG00000171101	SIGLEC17P	1.97406	4.23528e-05
ENSG00000084636	COL16A1	1.14343	4.31013e-05
ENSG00000170369	CST2	2.20866	4.31013e-05
ENSG00000113296	THBS4	1.21629	4.39135e-05
ENSG00000236714	LINC01844	-1.68162	4.45164e-05
ENSG00000180573	HIST1H2AC	1.11316	4.53561e-05
ENSG00000145335	SNCA	1.39504	4.56742e-05
ENSG00000175920	DOK7	0.977077	4.68932e-05
ENSG00000147408	CSGALNACT1	-0.850181	4.70953e-05
ENSG00000138193	PLCE1	1.2785	4.80675e-05
ENSG00000124374	PAIP2B	-0.992827	4.87822e-05
ENSG00000198873	GRK5	-1.23806	4.97203e-05
ENSG00000134709	HOOK1	-1.82091	5.18774e-05
ENSG00000076344	RGS11	1.11011	5.41987e-05
ENSG00000138622	HCN4	-1.53598	5.53037e-05
ENSG00000164164	OTUD4	-0.880554	5.53037e-05
ENSG00000111664	GNB3	1.34104	5.54561e-05
ENSG00000165868	HSPA12A	-0.897648	5.84399e-05
ENSG00000149809	TM7SF2	1.13064	6.13344e-05
ENSG00000148488	ST8SIA6	-0.991727	6.16237e-05
ENSG00000111907	TPD52L1	1.27247	6.24259e-05
ENSG00000078018	MAP2	1.2424	6.69297e-05
ENSG00000070540	WIPI1	0.782404	6.72763e-05
ENSG00000215246	LOC100506688	1.15771	6.72763e-05
ENSG00000081692	JMJD4	0.948667	6.73653e-05
ENSG00000100731	PCNX1	-0.937719	7.13572e-05
ENSG00000100592	DAAM1	-0.787205	7.17087e-05
ENSG00000165929	TC2N	-1.69629	7.32114e-05
ENSG00000139364	TMEM132B	-2.05514	7.39779e-05
ENSG00000234665	LOC403323	-2.10718	7.68694e-05
ENSG00000136436	CALCOCO2	-0.631492	7.79737e-05
ENSG00000039537	C6	-1.77624	7.91553e-05
ENSG00000171160	MORN4	1.01571	7.91553e-05
ENSG00000152377	SPOCK1	-1.56449	7.91606e-05
ENSG00000169252	ADRB2	-0.875537	8.01715e-05
ENSG00000184544	DHRS7C	-2.1365	8.07593e-05
ENSG00000196353	CPNE4	-1.6988	8.27365e-05
ENSG00000172175	MALT1	-0.799608	8.29761e-05
ENSG00000122861	PLAU	-1.18096	8.37405e-05
ENSG00000157734	SNX22	-1.88485	8.37405e-05
ENSG00000133107	TRPC4	-2.03945	8.39938e-05
ENSG00000154822	PLCL2	-1.08365	8.77978e-05
ENSG00000065989	PDE4A	-1.16552	9.09352e-05
ENSG00000165449	SLC16A9	1.67022	9.1706e-05
ENSG00000198830	HMGN2	1.3091	9.76427e-05
ENSG00000118260	CREB1	-0.7789	0.000101166
ENSG00000172572	PDE3A	-1.01499	0.000101933
ENSG00000213626	LBH	-0.907572	0.000103281
ENSG00000222041	CYTOR	1.67916	0.000103281
ENSG00000185669	SNAI3	-1.6498	0.00010626
ENSG00000113389	NPR3	0.979574	0.000107475
ENSG00000196850	PPTC7	-0.724336	0.000107475
ENSG00000214456	PLIN5	-1.04804	0.000112932
ENSG00000132681	ATP1A4	2.04994	0.000113858
ENSG00000164220	F2RL2	1.69721	0.000113858
ENSG00000172458	IL17D	1.40909	0.000120196
ENSG00000016402	IL20RA	-1.84707	0.000121536
ENSG00000112936	C7	-1.45544	0.000124324
ENSG00000140830	TXNL4B	1.0476	0.000125896
ENSG00000090530	P3H2	1.44908	0.00012694
ENSG00000162461	SLC25A34	-1.30258	0.000127967
ENSG00000197444	OGDHL	1.56541	0.000127967
ENSG00000226833	LOC100505774	1.53182	0.000129582
ENSG00000170629	DPY19L2P2	-1.67772	0.000132534
ENSG00000111058	ACSS3	-0.638784	0.000140166
ENSG00000134853	PDGFRA	-1.34811	0.000140166
ENSG00000139233	LLPH	0.946583	0.000140166
ENSG00000111371	SLC38A1	-0.844552	0.000140653
ENSG00000121957	GPSM2	-1.77191	0.000141829
ENSG00000255020	LOC100129129	2.06581	0.000154672
ENSG00000182197	EXT1	0.828386	0.000158305
ENSG00000214900	LINC01588	1.92891	0.000163385
ENSG00000225648	SBDSP1	1.07775	0.000163385
ENSG00000106077	ABHD11	1.13718	0.000165104
ENSG00000213722	DDAH2	0.839897	0.000166107
ENSG00000123358	NR4A1	-1.40184	0.000168856
ENSG00000138166	DUSP5	-0.965509	0.000169348
ENSG00000183077	AFMID	1.07827	0.000171796
ENSG00000166780	C16orf45	0.654243	0.000175006
ENSG00000125740	FOSB	-2.02256	0.000179376
ENSG00000206172	HBA1	2.04771	0.000183093
ENSG00000240045	DWORF	1.96368	0.000183093
ENSG00000145623	OSMR	-1.21833	0.000183264
ENSG00000163633	C4orf36	0.929175	0.000185619
ENSG00000135547	HEY2	-1.30334	0.000187024
ENSG00000234028	EIF2AK3-DT	1.52784	0.000187024
ENSG00000173114	LRRN3	-1.94541	0.0001914
ENSG00000233622	CYP2T1P	1.47135	0.0001914
ENSG00000170345	FOS	-2.02958	0.000192494
ENSG00000122176	FMOD	1.37536	0.000200246
ENSG00000253982	LOC101927752	0.902682	0.000201082
ENSG00000125827	TMX4	-0.908008	0.000204337
ENSG00000137764	MAP2K5	0.782241	0.000204337
ENSG00000170807	LMOD2	1.27497	0.000206209
ENSG00000136960	ENPP2	1.17299	0.000206844
ENSG00000076706	MCAM	0.725187	0.000208
ENSG00000214401	KANSL1-AS1	1.73139	0.000208
ENSG00000147010	SH3KBP1	-1.04715	0.000208507
ENSG00000155846	PPARGC1B	-1.0997	0.000208507
ENSG00000233485	LOC101927417	1.78855	0.000218915
ENSG00000160712	IL6R	-1.03323	0.00021928
ENSG00000166106	ADAMTS15	-1.41458	0.00021928
ENSG00000130700	GATA5	-1.8919	0.000232905
ENSG00000090339	ICAM1	-1.12508	0.000237498
ENSG00000176438	SYNE3	-1.39463	0.00023895
ENSG00000175220	ARHGAP1	0.818511	0.000241324
ENSG00000048707	VPS13D	-1.10171	0.000242316
ENSG00000076513	ANKRD13A	-0.924964	0.000242316
ENSG00000137040	RANBP6	-0.658779	0.000243377
ENSG00000164283	ESM1	1.91385	0.000259098
ENSG00000158604	TMED4	0.471635	0.000260153
ENSG00000106771	TMEM245	-0.780881	0.000264492
ENSG00000121361	KCNJ8	-0.893096	0.000264492
ENSG00000137343	ATAT1	0.910395	0.000264492
ENSG00000136167	LCP1	-1.09016	0.000269695
ENSG00000141431	ASXL3	-1.0691	0.000275218
ENSG00000162783	IER5	0.815296	0.000275218
ENSG00000155090	KLF10	-1.03566	0.000289195
ENSG00000156475	PPP2R2B	1.71005	0.000292782
ENSG00000196502	SULT1A1	0.937295	0.000298414
ENSG00000215301	DDX3X	-0.873549	0.000300944
ENSG00000184678	HIST2H2BE	0.712916	0.000304528
ENSG00000102683	SGCG	0.70748	0.000309166
ENSG00000149633	KIAA1755	1.14932	0.000309166
ENSG00000182771	GRID1	1.13611	0.000320357
ENSG00000197536	C5orf56	0.912408	0.000323769
ENSG00000092529	CAPN3	1.70432	0.000324627
ENSG00000143416	SELENBP1	-1.07481	0.000328569
ENSG00000164972	C9orf24	1.55184	0.000331982
ENSG00000159208	CIART	1.3196	0.000336117
ENSG00000134716	CYP2J2	1.01207	0.000337601
ENSG00000204580	DDR1	0.990109	0.00034963
ENSG00000106624	AEBP1	1.39046	0.000360528
ENSG00000108018	SORCS1	-1.60718	0.000360528
ENSG00000111252	SH2B3	-0.75045	0.000360528
ENSG00000143768	LEFTY2	1.46404	0.000360528
ENSG00000163399	ATP1A1	-0.867495	0.000360528
ENSG00000124614	RPS10	1.62356	0.000362574
ENSG00000118523	CTGF	1.44159	0.000367487
ENSG00000163638	ADAMTS9	-1.02839	0.00037113
ENSG00000127241	MASP1	1.12114	0.000371872
ENSG00000185565	LSAMP	-1.72322	0.000373467
ENSG00000101134	DOK5	1.09683	0.00037994
ENSG00000111816	FRK	-1.16798	0.000384593
ENSG00000229694	LINC00484	1.93473	0.000388792
ENSG00000124491	F13A1	-1.42524	0.000400086
ENSG00000160310	PRMT2	0.623485	0.000400086
ENSG00000114054	PCCB	0.631128	0.00040507
ENSG00000165943	MOAP1	0.678684	0.000409609
ENSG00000214194	SMIM30	1.27694	0.000409648
ENSG00000146063	TRIM41	0.764501	0.000413839
ENSG00000127863	TNFRSF19	-0.823665	0.000417725
ENSG00000105270	CLIP3	1.21886	0.00042748
ENSG00000232656	IDI2-AS1	1.37862	0.000434081
ENSG00000140459	CYP11A1	1.59018	0.000435244
ENSG00000140104	CLBA1	1.08676	0.000442193
ENSG00000160299	PCNT	-1.25544	0.000444741
ENSG00000177144	NUDT4B	-1.94298	0.000454523
ENSG00000172156	CCL11	-1.53097	0.000455411
ENSG00000188257	PLA2G2A	-1.85325	0.00046848
ENSG00000165995	CACNB2	-0.81076	0.000471226
ENSG00000168610	STAT3	-0.980335	0.000481622
ENSG00000115758	ODC1	0.924884	0.000501089
ENSG00000188536	HBA2	1.91812	0.000501089
ENSG00000140598	EFL1	-0.730633	0.000503213
ENSG00000138600	SPPL2A	-0.859235	0.000511571
ENSG00000177354	C10orf71	0.972061	0.000512683
ENSG00000156265	MAP3K7CL	1.86894	0.000514309
ENSG00000156011	PSD3	-0.97505	0.000522861
ENSG00000111846	GCNT2	-0.59787	0.00052417
ENSG00000135049	AGTPBP1	-0.717434	0.00053148
ENSG00000139926	FRMD6	-1.04716	0.000542903
ENSG00000171517	LPAR3	-0.887984	0.000544409
ENSG00000175591	P2RY2	-0.884914	0.000544409
ENSG00000180999	C1orf105	-1.45619	0.00054581
ENSG00000013588	GPRC5A	-1.88893	0.000548345
ENSG00000144724	PTPRG	-0.960146	0.000548345
ENSG00000129450	SIGLEC9	-1.82024	0.000549066
ENSG00000182836	PLCXD3	-0.798193	0.000551063
ENSG00000090565	RAB11FIP3	0.730838	0.000551548
ENSG00000091137	SLC26A4	1.5832	0.000551548
ENSG00000138018	SELENOI	-0.861485	0.000551548
ENSG00000147324	MFHAS1	-1.13534	0.000551548
ENSG00000168566	SNRNP48	-0.643251	0.000551548
ENSG00000240024	LINC00888	1.01916	0.000551548
ENSG00000164983	TMEM65	-0.691743	0.000552689
ENSG00000263874	LINC00672	1.6681	0.000558247
ENSG00000176490	DIRAS1	-0.842805	0.000567608
ENSG00000119280	C1orf198	0.615928	0.000577019
ENSG00000115956	PLEK	-1.15804	0.000588918
ENSG00000146021	KLHL3	-1.00834	0.000601561
ENSG00000258274	LOC101928731	1.78747	0.00060361
ENSG00000224152	LOC643072	0.823221	0.000604681
ENSG00000225383	SFTA1P	1.89694	0.000604681
ENSG00000177707	NECTIN3	-1.0496	0.000612021
ENSG00000145901	TNIP1	0.609892	0.000626209
ENSG00000152749	GPR180	-1.02229	0.000626209
ENSG00000180354	MTURN	0.63099	0.000631476
ENSG00000232352	SEMA3B-AS1	1.71961	0.000631476
ENSG00000170624	SGCD	-1.04125	0.00063357
ENSG00000248713	C4orf54	-1.88815	0.000637104
ENSG00000133687	TMTC1	-1.02081	0.0006543
ENSG00000152939	MARVELD2	-1.78618	0.000664666
ENSG00000137693	YAP1	-0.691177	0.00066926
ENSG00000188488	SERPINA5	-1.69186	0.000674515
ENSG00000205334	LINC01460	1.00571	0.000674515
ENSG00000198963	RORB	-1.46223	0.000683081
ENSG00000101347	SAMHD1	-0.894561	0.00068406
ENSG00000157426	AASDH	-0.796733	0.000687753
ENSG00000233117	LINC00702	1.30793	0.000687753
ENSG00000115963	RND3	0.785561	0.000692615
ENSG00000128045	RASL11B	1.466	0.000692615
ENSG00000006071	ABCC8	1.38577	0.000693717
ENSG00000164941	INTS8	-0.507893	0.000693757
ENSG00000134369	NAV1	-0.963878	0.000693778
ENSG00000170390	DCLK2	0.831884	0.000704894
ENSG00000135838	NPL	-1.0701	0.000723127
ENSG00000156599	ZDHHC5	-0.547472	0.000724468
ENSG00000117614	SYF2	0.626989	0.000725235
ENSG00000153233	PTPRR	1.48403	0.000726962
ENSG00000176454	LPCAT4	-1.03788	0.000735516
ENSG00000164509	IL31RA	1.86296	0.000735645
ENSG00000270959	LPP-AS2	0.904789	0.000735645
ENSG00000158014	SLC30A2	1.2411	0.0007364
ENSG00000095319	NUP188	0.836701	0.000740498
ENSG00000125675	GRIA3	1.41595	0.000740498
ENSG00000167964	RAB26	1.64483	0.000749371
ENSG00000003989	SLC7A2	-1.02779	0.000758537
ENSG00000237512	UNC5B-AS1	1.30747	0.000771334
ENSG00000132640	BTBD3	-0.486234	0.00078294
ENSG00000114770	ABCC5	-0.904371	0.00078561
ENSG00000139668	WDFY2	-0.930848	0.000788544
ENSG00000004776	HSPB6	1.17236	0.000788578
ENSG00000128872	TMOD2	-0.898753	0.000791491
ENSG00000182107	TMEM30B	1.3745	0.000791491
ENSG00000060656	PTPRU	-1.08569	0.00079324
ENSG00000115828	QPCT	1.37928	0.00079491
ENSG00000227544	LOC100506725	1.42541	0.000801497
ENSG00000159399	HK2	-1.01886	0.000807034
ENSG00000158859	ADAMTS4	-1.61815	0.000811113
ENSG00000130770	ATP5IF1	1.20512	0.000815385
ENSG00000107438	PDLIM1	0.674567	0.000822938
ENSG00000072274	TFRC	-1.27492	0.000838429
ENSG00000136840	ST6GALNAC4	0.859573	0.000849089
ENSG00000124733	MEA1	0.912215	0.000864539
ENSG00000137710	RDX	-0.461928	0.000864539
ENSG00000175048	ZDHHC14	0.724416	0.000864539
ENSG00000196968	FUT11	-0.516816	0.000864539
ENSG00000160862	AZGP1	-1.33957	0.000866223
ENSG00000140795	MYLK3	-1.00776	0.000880451
ENSG00000141576	RNF157	-1.37501	0.000880451
ENSG00000166441	RPL27A	1.26984	0.000880451
ENSG00000236609	ZNF853	0.730186	0.000925996
ENSG00000173852	DPY19L1	-0.512685	0.000930402
ENSG00000130513	GDF15	1.79798	0.000937678
ENSG00000101440	ASIP	1.13895	0.000940131
ENSG00000103319	EEF2K	-0.791576	0.000944067
ENSG00000214960	ISPD	-1.16154	0.000944067
ENSG00000134109	EDEM1	-0.752879	0.000945242
ENSG00000143995	MEIS1	-0.840467	0.000952478
ENSG00000163328	GPR155	-0.686791	0.000953869
ENSG00000178033	CALHM5	-0.861016	0.000953869
ENSG00000105963	ADAP1	1.19869	0.000953935
ENSG00000124198	ARFGEF2	-0.680446	0.000953935
ENSG00000143553	SNAPIN	1.16922	0.000954088
ENSG00000084073	ZMPSTE24	-0.749538	0.000962042
ENSG00000112773	TENT5A	-0.878432	0.000962042
ENSG00000197380	DACT3	0.996247	0.000962042
ENSG00000137154	RPS6	1.37678	0.000979457
ENSG00000187479	C11orf96	-1.2449	0.000979457
ENSG00000037749	MFAP3	-0.613028	0.000982245
ENSG00000205221	VIT	-1.37146	0.000982245
ENSG00000075539	FRYL	-0.764637	0.00100009
ENSG00000088833	NSFL1C	0.417792	0.00100221
ENSG00000160111	CPAMD8	-1.21688	0.00100372
ENSG00000165507	DEPP1	0.803812	0.0010123
ENSG00000177791	MYOZ1	1.49893	0.0010123
ENSG00000250392	LINC02502	1.5664	0.0010123
ENSG00000154240	CEP112	-0.71685	0.00101643
ENSG00000204387	C6orf48	1.02082	0.0010198
ENSG00000070882	OSBPL3	-1.15529	0.0010427
ENSG00000143353	LYPLAL1	1.15658	0.0010427
ENSG00000231999	LRRC8C-DT	1.24312	0.0010427
ENSG00000074695	LMAN1	-0.65779	0.00105001
ENSG00000108256	NUFIP2	-0.766215	0.00107723
ENSG00000112175	BMP5	-1.21075	0.00107723
ENSG00000120885	CLU	0.836392	0.00108883
ENSG00000168619	ADAM18	1.81283	0.00110818
ENSG00000124343	XG	1.70046	0.00111161
ENSG00000116717	GADD45A	0.782659	0.00111934
ENSG00000215218	UBE2QL1	0.66259	0.00112021
ENSG00000185697	MYBL1	0.940433	0.00112391
ENSG00000183508	TENT5C	-0.925502	0.00112574
ENSG00000261617	LINC02177	-1.80565	0.00113375
ENSG00000162496	DHRS3	0.869891	0.00113925
ENSG00000187079	TEAD1	-0.854608	0.00115777
ENSG00000198825	INPP5F	0.782975	0.00115777
ENSG00000100335	MIEF1	-0.560484	0.00116134
ENSG00000158486	DNAH3	-1.6253	0.00118978
ENSG00000167772	ANGPTL4	-1.7372	0.00119429
ENSG00000231500	RPS18	1.35926	0.0012098
ENSG00000136937	NCBP1	-0.628494	0.00122202
ENSG00000170162	VGLL2	1.78551	0.00122202
ENSG00000149599	DUSP15	1.15504	0.00123575
ENSG00000150551	LYPD1	1.7152	0.00127416
ENSG00000006451	RALA	-0.575135	0.00127939
ENSG00000120156	TEK	-0.807353	0.00128214
ENSG00000162882	HAAO	1.13023	0.00128214
ENSG00000249087	ZNF436-AS1	1.26011	0.00128214
ENSG00000047849	MAP4	0.888937	0.00129902
ENSG00000184925	LCN12	1.33144	0.00130382
ENSG00000130222	GADD45G	1.55742	0.00130974
ENSG00000109670	FBXW7	-0.75862	0.00131685
ENSG00000110811	P3H3	0.705924	0.00132366
ENSG00000175699	CCDC197	1.67733	0.00132366
ENSG00000153446	C16orf89	1.40613	0.00133392
ENSG00000119403	PHF19	0.704861	0.0013433
ENSG00000130962	PRRG1	-0.735721	0.00134658
ENSG00000070718	AP3M2	0.787774	0.00135225
ENSG00000121413	ZSCAN18	0.813647	0.00135234
ENSG00000154027	AK5	1.41074	0.00136071
ENSG00000137821	LRRC49	1.16873	0.00136878
ENSG00000143198	MGST3	0.953476	0.00138413
ENSG00000163584	RPL22L1	1.35763	0.00139763
ENSG00000170456	DENND5B	-0.842627	0.00141818
ENSG00000236144	TMEM147-AS1	0.965616	0.00141937
ENSG00000073008	PVR	-0.946579	0.00145548
ENSG00000121680	PEX16	0.656128	0.00149069
ENSG00000172716	SLFN11	-0.665365	0.00152609
ENSG00000165983	PTER	-0.67065	0.00153194
ENSG00000171385	KCND3	-0.925611	0.00154339
ENSG00000179523	EIF3J-DT	1.01896	0.00155364
ENSG00000138356	AOX1	-1.60119	0.00156465
ENSG00000103415	HMOX2	-0.780677	0.00157342
ENSG00000121060	TRIM25	-1.07997	0.0015884
ENSG00000204228	HSD17B8	1.10733	0.00158951
ENSG00000215375	MYL5	1.21169	0.00158951
ENSG00000168135	KCNJ4	1.00653	0.00160187
ENSG00000118900	UBN1	-0.892312	0.00160341
ENSG00000183186	C2CD4C	-1.64257	0.00162088
ENSG00000068796	KIF2A	-0.81009	0.0016253
ENSG00000152402	GUCY1A2	-1.17019	0.0016253
ENSG00000164951	PDP1	-0.670733	0.0016253
ENSG00000076685	NT5C2	0.60839	0.00164508
ENSG00000065060	UHRF1BP1	-0.742762	0.00164755
ENSG00000170525	PFKFB3	-0.889249	0.00164755
ENSG00000115468	EFHD1	0.899576	0.00165838
ENSG00000145725	PPIP5K2	-0.763243	0.00165838
ENSG00000112276	BVES	-0.854337	0.00168186
ENSG00000136274	NACAD	-1.01487	0.0016839
ENSG00000109572	CLCN3	-0.706828	0.0017037
ENSG00000100027	YPEL1	0.764848	0.00172541
ENSG00000256222	MTRNR2L3	-1.76365	0.00173199
ENSG00000079482	OPHN1	-0.990785	0.00173502
ENSG00000179639	FCER1A	1.54085	0.00175297
ENSG00000124479	NDP	1.69156	0.00176002
ENSG00000076826	CAMSAP3	-1.75643	0.00178826
ENSG00000127452	FBXL12	0.661407	0.00178826
ENSG00000158006	PAFAH2	0.574663	0.00178826
ENSG00000171303	KCNK3	-1.41825	0.00178826
ENSG00000175894	TSPEAR	-1.76162	0.00178826
ENSG00000115159	GPD2	-0.799354	0.00179493
ENSG00000085831	TTC39A	0.679016	0.00180135
ENSG00000119650	IFT43	1.24663	0.00181988
ENSG00000153879	CEBPG	-0.551076	0.00187523
ENSG00000196843	ARID5A	0.979796	0.00189269
ENSG00000163491	NEK10	-1.01519	0.00193238
ENSG00000144802	NFKBIZ	-0.990401	0.00194275
ENSG00000230102	LINC02028	1.46586	0.00194321
ENSG00000133800	LYVE1	-1.39752	0.00194636
ENSG00000155463	OXA1L	0.582914	0.00194636
ENSG00000173276	ZBTB21	-0.78201	0.00194636
ENSG00000044446	PHKA2	-0.844644	0.0020017
ENSG00000023445	BIRC3	-1.24044	0.00200927
ENSG00000183513	COA5	1.08035	0.00201777
ENSG00000112667	DNPH1	0.979938	0.00203082
ENSG00000173530	TNFRSF10D	-1.13744	0.0020402
ENSG00000124243	BCAS4	1.33681	0.00206726
ENSG00000164142	FAM160A1	-1.07513	0.00206726
ENSG00000182628	SKA2	0.673975	0.00206726
ENSG00000205213	LGR4	-0.773647	0.00206726
ENSG00000090097	PCBP4	0.633245	0.00210435
ENSG00000112077	RHAG	-1.73574	0.00210944
ENSG00000170315	UBB	0.914976	0.00210944
ENSG00000137502	RAB30	-0.744806	0.00211788
ENSG00000149273	RPS3	1.21208	0.00211788
ENSG00000154736	ADAMTS5	-1.41415	0.00211953
ENSG00000102580	DNAJC3	-0.692623	0.00217093
ENSG00000150628	SPATA4	1.60173	0.00217979
ENSG00000075886	TUBA3D	-1.52024	0.00219087
ENSG00000084693	AGBL5	0.73164	0.00226911
ENSG00000144320	LNPK	-0.717406	0.00226911
ENSG00000215712	TMEM242	0.636959	0.00226911
ENSG00000158813	EDA	-0.926014	0.00228412
ENSG00000072134	EPN2	-0.548917	0.00229725
ENSG00000104635	SLC39A14	-0.719052	0.00229725
ENSG00000088179	PTPN4	-0.693505	0.00231052
ENSG00000126067	PSMB2	0.475535	0.00231697
ENSG00000164741	DLC1	-0.919244	0.00231734
ENSG00000185909	KLHDC8B	0.74583	0.00231734
ENSG00000135677	GNS	-0.661164	0.00232412
ENSG00000152332	UHMK1	-0.749723	0.00234569
ENSG00000059804	SLC2A3	-1.18754	0.00236804
ENSG00000099977	DDT	1.09557	0.00239454
ENSG00000155659	VSIG4	-1.2626	0.00239454
ENSG00000110324	IL10RA	-1.10932	0.00242492
ENSG00000137575	SDCBP	-0.666862	0.00242492
ENSG00000196482	ESRRG	-0.898791	0.00245997
ENSG00000269964	MEI4	-1.46753	0.00245997
ENSG00000100104	SRRD	-0.508568	0.00246483
ENSG00000141456	PELP1	0.748706	0.00246483
ENSG00000205795	CYS1	1.27173	0.00246483
ENSG00000135643	KCNMB4	1.0614	0.00246817
ENSG00000136631	VPS45	0.549254	0.00246971
ENSG00000163251	FZD5	-0.990165	0.00248724
ENSG00000104883	PEX11G	1.47881	0.00250713
ENSG00000111913	RIPOR2	1.09455	0.00252513
ENSG00000108518	PFN1	0.656871	0.00255405
ENSG00000141298	SSH2	-0.670191	0.00255662
ENSG00000111860	CEP85L	-1.16698	0.00255798
ENSG00000181788	SIAH2	0.676506	0.00255798
ENSG00000148377	IDI2	1.68011	0.00257084
ENSG00000167588	GPD1	-1.3439	0.00257326
ENSG00000166228	PCBD1	0.822946	0.00260181
ENSG00000177034	MTX3	-1.0219	0.00260181
ENSG00000254636	ARMS2	1.69844	0.00260199
ENSG00000105516	DBP	1.01466	0.00265889
ENSG00000100292	HMOX1	-1.04657	0.00269525
ENSG00000164405	UQCRQ	1.27121	0.00269525
ENSG00000010219	DYRK4	0.923714	0.00272231
ENSG00000058404	CAMK2B	0.692176	0.00276413
ENSG00000150403	TMCO3	0.688353	0.00276413
ENSG00000096968	JAK2	1.00582	0.00280904
ENSG00000163875	MEAF6	0.604344	0.0028468
ENSG00000272695	GAS6-DT	0.907996	0.0028468
ENSG00000188706	ZDHHC9	-0.835376	0.00285875
ENSG00000205084	TMEM231	0.888989	0.00286203
ENSG00000003147	ICA1	0.523584	0.00292934
ENSG00000119681	LTBP2	1.08943	0.00292934
ENSG00000120889	TNFRSF10B	-0.619341	0.00293083
ENSG00000074603	DPP8	-0.606302	0.00294132
ENSG00000077514	POLD3	-0.713413	0.00294132
ENSG00000174669	SLC29A2	-0.792439	0.00298094
ENSG00000140463	BBS4	0.804352	0.00299461
ENSG00000186493	C5orf38	1.31071	0.00301332
ENSG00000024862	CCDC28A	0.747369	0.00304705
ENSG00000054654	SYNE2	-0.883031	0.00305688
ENSG00000090054	SPTLC1	-0.561989	0.00307599
ENSG00000188338	SLC38A3	1.01395	0.00309104
ENSG00000164742	ADCY1	-1.23009	0.00312406
ENSG00000204282	TNRC6C-AS1	1.11854	0.00313669
ENSG00000112406	HECA	-0.800275	0.00315257
ENSG00000163430	FSTL1	-0.650106	0.0032244
ENSG00000101144	BMP7	-1.453	0.0032418
ENSG00000126214	KLC1	0.528767	0.0032418
ENSG00000153234	NR4A2	-1.52485	0.0032418
ENSG00000197766	CFD	-1.26949	0.00329759
ENSG00000105559	PLEKHA4	0.728988	0.00330136
ENSG00000065923	SLC9A7	-1.32907	0.00333031
ENSG00000221914	PPP2R2A	-0.368275	0.00333853
ENSG00000198055	GRK6	0.684507	0.00335091
ENSG00000163961	RNF168	-0.783745	0.00335822
ENSG00000235505	CASP17P	1.26629	0.00335822
ENSG00000236404	VLDLR-AS1	1.30336	0.00336493
ENSG00000065361	ERBB3	-1.17055	0.00341516
ENSG00000162852	CNST	-0.546392	0.00341516
ENSG00000152137	HSPB8	0.493633	0.00347876
ENSG00000206538	VGLL3	-1.39448	0.00347876
ENSG00000181218	HIST3H2A	1.33248	0.00354538
ENSG00000180525	PRR26	-1.37922	0.00356439
ENSG00000165526	RPUSD4	0.545782	0.00356839
ENSG00000188215	DCUN1D3	-0.769374	0.00358769
ENSG00000231991	ANXA2P2	-1.55163	0.00359824
ENSG00000237172	B3GNT9	0.640617	0.00362203
ENSG00000005020	SKAP2	-0.972033	0.00362972
ENSG00000143632	ACTA1	1.06929	0.00363081
ENSG00000106868	SUSD1	-0.875275	0.00363785
ENSG00000099341	PSMD8	0.808033	0.00369591
ENSG00000105926	MPP6	-1.3094	0.00369591
ENSG00000110492	MDK	1.18714	0.00369591
ENSG00000112357	PEX7	0.732921	0.00369591
ENSG00000119396	RAB14	-0.435832	0.00369591
ENSG00000159423	ALDH4A1	0.644951	0.00371882
ENSG00000170837	GPR27	1.03114	0.00372475
ENSG00000134569	LRP4	-0.956758	0.00374341
ENSG00000136048	DRAM1	-0.885613	0.00374341
ENSG00000180440	SERTM1	-1.66199	0.00374341
ENSG00000225791	TRAM2-AS1	0.856538	0.00374341
ENSG00000113068	PFDN1	0.90348	0.00374479
ENSG00000145936	KCNMB1	1.0283	0.00375331
ENSG00000140564	FURIN	-0.66176	0.00375516
ENSG00000057252	SOAT1	-0.657965	0.00379124
ENSG00000118596	SLC16A7	-1.00072	0.00379124
ENSG00000168615	ADAM9	-0.637596	0.00379124
ENSG00000113805	CNTN3	-1.37948	0.00381631
ENSG00000118292	C1orf54	1.34023	0.00382161
ENSG00000110917	MLEC	-0.727264	0.00383112
ENSG00000164168	TMEM184C	-0.45425	0.00383112
ENSG00000042445	RETSAT	-0.929026	0.00383362
ENSG00000171345	KRT19	-1.61468	0.00383667
ENSG00000197747	S100A10	-0.942988	0.00383667
ENSG00000197991	PCDH20	-1.40336	0.00383667
ENSG00000185339	TCN2	-0.637639	0.00384593
ENSG00000164841	TMEM74	1.20952	0.00389719
ENSG00000004468	CD38	-1.16145	0.00390205
ENSG00000107290	SETX	-0.710983	0.00390205
ENSG00000060762	MPC1	0.976475	0.00390649
ENSG00000113319	RASGRF2	-0.950332	0.00390649
ENSG00000143549	TPM3	1.0818	0.00390649
ENSG00000246528	LOC101929759	1.37651	0.00390649
ENSG00000138674	SEC31A	0.389536	0.00393701
ENSG00000138138	ATAD1	-0.423775	0.00397068
ENSG00000089820	ARHGAP4	-0.721216	0.00398939
ENSG00000113441	LNPEP	-0.880107	0.00399062
ENSG00000175970	UNC119B	-0.731559	0.00399699
ENSG00000205403	CFI	-0.766497	0.00400049
ENSG00000154556	SORBS2	0.561287	0.00402116
ENSG00000157514	TSC22D3	0.943589	0.00402116
ENSG00000005889	ZFX	-0.728337	0.00404209
ENSG00000157557	ETS2	-0.763875	0.00404209
ENSG00000115602	IL1RL1	-1.5879	0.00404702
ENSG00000171885	AQP4	-1.62809	0.00404702
ENSG00000163873	GRIK3	-1.50301	0.00405969
ENSG00000166482	MFAP4	0.883223	0.00407262
ENSG00000172159	FRMD3	0.618614	0.00409542
ENSG00000150471	ADGRL3	0.907465	0.00409982
ENSG00000101251	SEL1L2	1.63011	0.00412568
ENSG00000141401	IMPA2	-0.689037	0.00414708
ENSG00000162706	CADM3	-1.21096	0.00415479
ENSG00000263563	UBBP4	0.9456	0.00415479
ENSG00000172992	DCAKD	0.544652	0.0041785
ENSG00000205835	GMNC	-1.64055	0.0041785
ENSG00000240857	RDH14	-0.489689	0.0041785
ENSG00000257303	LOC112268098	1.35008	0.0041785
ENSG00000066629	EML1	-0.659593	0.00421177
ENSG00000114573	ATP6V1A	-0.556017	0.00421596
ENSG00000122378	PRXL2A	-0.617219	0.00421596
ENSG00000103066	PLA2G15	0.561462	0.00422816
ENSG00000234719	NPIPB2	1.59218	0.00425432
ENSG00000176399	DMRTA1	-1.05505	0.00425917
ENSG00000070423	RNF126	0.587322	0.0042988
ENSG00000108582	CPD	-0.730503	0.00438034
ENSG00000175356	SCUBE2	1.31844	0.00438034
ENSG00000162407	PLPP3	-0.631807	0.00448368
ENSG00000080709	KCNN2	-1.08998	0.004498
ENSG00000198399	ITSN2	-0.543471	0.004498
ENSG00000140285	FGF7	-0.997975	0.00450581
ENSG00000156531	PHF6	-0.668698	0.0045243
ENSG00000128928	IVD	0.554689	0.0045328
ENSG00000113578	FGF1	0.56238	0.00453308
ENSG00000179915	NRXN1	-0.792228	0.00453308
ENSG00000184226	PCDH9	-0.84767	0.00453308
ENSG00000258940	LOC100288846	1.61427	0.00453308
ENSG00000165623	UCMA	1.60908	0.00454894
ENSG00000082438	COBLL1	-0.831722	0.00456443
ENSG00000100216	TOMM22	0.847154	0.00456443
ENSG00000197147	LRRC8B	-1.07756	0.00458
ENSG00000138413	IDH1	-0.567201	0.0045828
ENSG00000112697	TMEM30A	-0.507279	0.00458379
ENSG00000130529	TRPM4	0.557665	0.00458379
ENSG00000185924	RTN4RL1	-1.26642	0.00459401
ENSG00000242265	PEG10	-0.937877	0.00461405
ENSG00000148730	EIF4EBP2	-0.553499	0.00462092
ENSG00000115594	IL1R1	-0.852984	0.00463832
ENSG00000055813	CCDC85A	-1.14522	0.00464091
ENSG00000126005	MMP24OS	0.735195	0.00464091
ENSG00000169085	VXN	1.06691	0.00464091
ENSG00000157110	RBPMS	0.420768	0.00466745
ENSG00000103365	GGA2	-0.581387	0.00467716
ENSG00000087495	PHACTR3	-1.22121	0.0047117
ENSG00000105976	MET	-0.656109	0.0047117
ENSG00000110011	DNAJC4	0.629093	0.0047117
ENSG00000171408	PDE7B	-0.91306	0.0047117
ENSG00000196932	TMEM26	-1.61768	0.0047117
ENSG00000250305	TRMT9B	-0.674417	0.0047117
ENSG00000134824	FADS2	0.833102	0.00473795
ENSG00000189056	RELN	-1.40876	0.00473923
ENSG00000134852	CLOCK	-0.681195	0.0047583
ENSG00000170634	ACYP2	1.07192	0.0047583
ENSG00000050426	LETMD1	0.671339	0.00476054
ENSG00000132256	TRIM5	-0.725113	0.00478474
ENSG00000165912	PACSIN3	0.594096	0.00480334
ENSG00000267206	LCN6	-1.50101	0.00486918
ENSG00000108691	CCL2	-1.524	0.00487453
ENSG00000107890	ANKRD26	-0.779202	0.00491276
ENSG00000129116	PALLD	-0.692446	0.00491716
ENSG00000162241	SLC25A45	0.879646	0.00491716
ENSG00000184194	GPR173	1.25741	0.00493542
ENSG00000136378	ADAMTS7	-1.09184	0.00494945
ENSG00000163435	ELF3	-1.59884	0.00494945
ENSG00000171703	TCEA2	0.748217	0.00494945
ENSG00000136868	SLC31A1	-0.699109	0.00496524
ENSG00000188559	RALGAPA2	-0.923039	0.00500651
ENSG00000132879	FBXO44	0.631732	0.00501931
ENSG00000196227	FAM217B	-0.490764	0.00502391
ENSG00000103404	USP31	-0.840744	0.00503266
ENSG00000144357	UBR3	-0.663998	0.00504066
ENSG00000122406	RPL5	0.99502	0.0050693
ENSG00000254453	NAV2-AS2	1.01111	0.00509194
ENSG00000173221	GLRX	1.11869	0.00512492
ENSG00000111404	RERGL	1.2281	0.00515066
ENSG00000105374	NKG7	1.41249	0.00516814
ENSG00000205771	CATSPER2P1	1.4904	0.0051757
ENSG00000076351	SLC46A1	-0.970694	0.00518865
ENSG00000101892	ATP1B4	1.38741	0.00523815
ENSG00000120833	SOCS2	0.762872	0.00523889
ENSG00000155096	AZIN1	0.756964	0.00523889
ENSG00000105810	CDK6	-0.811318	0.0052645
ENSG00000170961	HAS2	-1.28721	0.0052645
ENSG00000164116	GUCY1A1	-0.720138	0.0052738
ENSG00000145860	RNF145	-0.576616	0.00530011
ENSG00000138629	UBL7	0.569399	0.00542127
ENSG00000164023	SGMS2	-0.78981	0.00542127
ENSG00000144893	MED12L	1.26963	0.00542873
ENSG00000117592	PRDX6	-0.621397	0.00544473
ENSG00000143595	AQP10	1.54634	0.00544473
ENSG00000163739	CXCL1	-1.58569	0.00544473
ENSG00000196235	SUPT5H	0.53341	0.00544473
ENSG00000169228	RAB24	1.14521	0.00550812
ENSG00000155380	SLC16A1	-0.47912	0.00552316
ENSG00000231050	LOC105378949	1.58693	0.00555413
ENSG00000197375	SLC22A5	-0.688385	0.00555442
ENSG00000243742	RPLP0P2	1.49456	0.00557852
ENSG00000253710	ALG11	-1.06016	0.00558949
ENSG00000184185	KCNJ12	-0.843996	0.00560595
ENSG00000214717	ZBED1	0.525983	0.00560595
ENSG00000137955	RABGGTB	0.910326	0.00564682
ENSG00000106780	MEGF9	-0.779099	0.00567479
ENSG00000126773	PCNX4	0.598907	0.00578199
ENSG00000255248	MIR100HG	1.04564	0.00583658
ENSG00000132821	VSTM2L	-1.41784	0.00583887
ENSG00000137221	TJAP1	0.609593	0.00589842
ENSG00000170677	SOCS6	-0.661184	0.00593132
ENSG00000108021	FAM208B	-0.690818	0.00595317
ENSG00000082014	SMARCD3	0.785584	0.0059754
ENSG00000109686	SH3D19	0.531086	0.00599971
ENSG00000152894	PTPRK	-0.729005	0.00607326
ENSG00000018610	CXorf56	0.517902	0.006103
ENSG00000068697	LAPTM4A	-0.566235	0.00616335
ENSG00000148841	ITPRIP	0.729277	0.00625582
ENSG00000157554	ERG	-0.584085	0.00626668
ENSG00000177374	HIC1	-1.20496	0.00626668
ENSG00000136928	GABBR2	-1.54288	0.00628703
ENSG00000106819	ASPN	1.14033	0.00632332
ENSG00000165997	ARL5B	-0.785832	0.00636729
ENSG00000121764	HCRTR1	-1.57738	0.00637266
ENSG00000259494	MRPL46	0.93085	0.00640983
ENSG00000197746	PSAP	-0.59058	0.0064125
ENSG00000064309	CDON	-1.02064	0.00641432
ENSG00000236581	STARD13-AS	1.54654	0.00641432
ENSG00000164151	ICE1	-0.73909	0.00643885
ENSG00000128923	MINDY2	-0.778063	0.00648166
ENSG00000183018	SPNS2	-0.978091	0.00648166
ENSG00000094975	SUCO	-0.665585	0.00652367
ENSG00000173376	NDNF	-0.964718	0.00652367
ENSG00000175832	ETV4	1.26935	0.00652367
ENSG00000155850	SLC26A2	-1.1563	0.00656901
ENSG00000100784	RPS6KA5	-0.729599	0.00666998
ENSG00000107833	NPM3	0.993811	0.00671679
ENSG00000163624	CDS1	-1.43173	0.00679593
ENSG00000177181	RIMKLA	-0.679435	0.00682062
ENSG00000185033	SEMA4B	-0.828937	0.00684274
ENSG00000109606	DHX15	-0.429678	0.00686249
ENSG00000107242	PIP5K1B	-0.586599	0.00690416
ENSG00000133028	SCO1	0.532036	0.00692152
ENSG00000112511	PHF1	0.543769	0.00692616
ENSG00000146540	C7orf50	0.944114	0.00692616
ENSG00000069974	RAB27A	-0.960979	0.00692898
ENSG00000175567	UCP2	0.815415	0.00692898
ENSG00000185477	GPRIN3	-0.756746	0.00692898
ENSG00000104490	NCALD	-0.720587	0.00696506
ENSG00000165434	PGM2L1	-0.821698	0.00696506
ENSG00000147255	IGSF1	1.14193	0.00697503
ENSG00000175206	NPPA	1.54947	0.00697503
ENSG00000188493	C19orf54	0.641191	0.00699576
ENSG00000177570	SAMD12	0.799886	0.00699697
ENSG00000040933	INPP4A	-0.618811	0.00701535
ENSG00000237125	HAND2-AS1	0.57694	0.00702568
ENSG00000143947	RPS27A	0.970789	0.0070326
ENSG00000154639	CXADR	-0.649645	0.00706165
ENSG00000176209	SMIM19	1.02098	0.00706165
ENSG00000131373	HACL1	0.611213	0.00706282
ENSG00000174446	SNAPC5	0.76068	0.00706544
ENSG00000121579	NAA50	-0.503959	0.00706865
ENSG00000135272	MDFIC	0.669205	0.00708338
ENSG00000104643	MTMR9	-0.47923	0.00710168
ENSG00000054523	KIF1B	-0.700834	0.0071515
ENSG00000100399	CHADL	-1.01857	0.0071515
ENSG00000152822	GRM1	0.935596	0.0071515
ENSG00000173918	C1QTNF1	-1.06609	0.00719242
ENSG00000205038	PKHD1L1	-1.54275	0.0072516
ENSG00000006459	KDM7A	-0.782182	0.00729577
ENSG00000071537	SEL1L	-0.56213	0.00731685
ENSG00000168256	NKIRAS2	0.507662	0.00731685
ENSG00000169249	ZRSR2	0.739288	0.00731685
ENSG00000179772	FOXS1	0.97519	0.00731685
ENSG00000185559	DLK1	-1.45368	0.00732527
ENSG00000118156	ZNF541	1.21057	0.00737618
ENSG00000157782	CABP1	-0.908005	0.00737618
ENSG00000108641	B9D1	1.06632	0.00752469
ENSG00000128655	PDE11A	-1.45474	0.00763904
ENSG00000168502	MTCL1	0.758266	0.00763904
ENSG00000177464	GPR4	-0.909959	0.00763904
ENSG00000169047	IRS1	-0.747489	0.00764843
ENSG00000170871	KIAA0232	-0.644934	0.00766248
ENSG00000136235	GPNMB	0.707628	0.00767469
ENSG00000138639	ARHGAP24	0.623693	0.00767469
ENSG00000241135	LINC00881	-1.13228	0.00767803
ENSG00000053372	MRTO4	0.626182	0.0076867
ENSG00000131724	IL13RA1	-0.680318	0.00770999
ENSG00000031081	ARHGAP31	-0.791395	0.00773689
ENSG00000214814	FER1L6	-1.54594	0.00773689
ENSG00000130558	OLFM1	-0.885354	0.00779469
ENSG00000126524	SBDS	0.599702	0.00794775
ENSG00000175701	MTLN	1.12094	0.00796152
ENSG00000143153	ATP1B1	-0.557699	0.00798146
ENSG00000132688	NES	0.853133	0.0079905
ENSG00000092439	TRPM7	-0.705154	0.00800284
ENSG00000108387	SEPTIN4	-0.752087	0.00800284
ENSG00000109265	KIAA1211	1.48315	0.00800284
ENSG00000130592	LSP1	0.763081	0.00801059
ENSG00000124596	OARD1	0.563984	0.00802984
ENSG00000070756	PABPC1	0.440134	0.00805829
ENSG00000102287	GABRE	0.90999	0.00805829
ENSG00000161800	RACGAP1	-1.02267	0.00806512
ENSG00000011405	PIK3C2A	-0.652393	0.00807724
ENSG00000079616	KIF22	1.00903	0.00807724
ENSG00000112297	CRYBG1	-1.05891	0.00807724
ENSG00000187773	DIPK1C	1.06191	0.00812842
ENSG00000135077	HAVCR2	-1.24285	0.00823371
ENSG00000165548	TMEM63C	-1.52143	0.00824636
ENSG00000137880	GCHFR	-1.11524	0.00831736
ENSG00000139514	SLC7A1	-0.814493	0.00837785
ENSG00000078328	RBFOX1	-0.654096	0.00840707
ENSG00000172954	LCLAT1	-0.626155	0.00840707
ENSG00000092969	TGFB2	1.11682	0.00841311
ENSG00000124772	CPNE5	-1.34301	0.00841888
ENSG00000233006	MIR3936HG	0.907583	0.00844125
ENSG00000161649	CD300LG	-0.877539	0.00855529
ENSG00000165209	STRBP	-0.524432	0.00856294
ENSG00000145736	GTF2H2	-1.37818	0.00858006
ENSG00000169964	TMEM42	1.12365	0.00860909
ENSG00000110328	GALNT18	0.688256	0.00862682
ENSG00000107338	SHB	0.713953	0.00865031
ENSG00000235927	NEXN-AS1	-1.51563	0.00865031
ENSG00000175785	PRIMA1	-0.960033	0.0086694
ENSG00000114302	PRKAR2A	-0.57695	0.0086708
ENSG00000160216	AGPAT3	-0.68454	0.00879478
ENSG00000179598	PLD6	-0.94002	0.0088012
ENSG00000166265	CYYR1	-0.574161	0.00881842
ENSG00000086062	B4GALT1	-0.557464	0.00883096
ENSG00000080573	COL5A3	-1.06887	0.00885445
ENSG00000100211	CBY1	0.594619	0.00887795
ENSG00000243279	PRAF2	0.614843	0.00888947
ENSG00000186335	SLC36A2	-1.52553	0.00890915
ENSG00000151229	SLC2A13	-1.103	0.00893474
ENSG00000167549	CORO6	0.523958	0.00893474
ENSG00000257337	LOC283335	0.669078	0.00893474
ENSG00000267365	KCNJ2-AS1	0.781779	0.00893767
ENSG00000179262	RAD23A	0.555533	0.00894011
ENSG00000205476	CCDC85C	-0.688913	0.00894011
ENSG00000227195	MIR663AHG	-1.49531	0.00894011
ENSG00000116138	DNAJC16	-0.617326	0.00897493
ENSG00000184307	ZDHHC23	-1.35551	0.00897493
ENSG00000125812	GZF1	-0.445601	0.00897545
ENSG00000164171	ITGA2	-1.18587	0.0089945
ENSG00000108639	SYNGR2	0.659885	0.00903268
ENSG00000123575	FAM199X	-0.616856	0.00907686
ENSG00000105619	TFPT	0.63871	0.00915507
ENSG00000084754	HADHA	-0.579754	0.00916277
ENSG00000135447	PPP1R1A	-0.876887	0.00918916
ENSG00000147576	ADHFE1	0.623418	0.00918916
ENSG00000091157	WDR7	-0.679377	0.00919776
ENSG00000117868	ESYT2	-0.563139	0.00919776
ENSG00000131374	TBC1D5	-0.674982	0.00923872
ENSG00000179104	TMTC2	-1.03	0.00926552
ENSG00000116199	FAM20B	-0.427018	0.00928809
ENSG00000135766	EGLN1	-0.570437	0.00928809
ENSG00000171368	TPPP	-1.02117	0.00928809
ENSG00000182492	BGN	0.873843	0.00928809
ENSG00000155561	NUP205	-0.590615	0.00932006
ENSG00000084623	EIF3I	0.69714	0.00935463
ENSG00000099860	GADD45B	0.74786	0.00951663
ENSG00000198839	ZNF277	0.954141	0.00952816
ENSG00000175899	A2M	-0.70449	0.00959281
ENSG00000146809	ASB15	-0.932937	0.00966492
ENSG00000188243	COMMD6	1.1422	0.00973388
ENSG00000225062	CATIP-AS1	1.43376	0.00980389
ENSG00000154309	DISP1	-0.785135	0.00982276
ENSG00000169891	REPS2	-1.04498	0.00987022
ENSG00000203747	FCGR3A	-0.988586	0.00988554
ENSG00000170860	LSM3	0.960076	0.00988597
ENSG00000218018	LOC100291105	1.15333	0.00991481
ENSG00000198300	PEG3	-0.716668	0.00996357
ENSG00000142937	RPS8	0.983832	0.0100155
ENSG00000049246	PER3	0.898023	0.0100779
ENSG00000064300	NGFR	-1.10945	0.0101148
ENSG00000125414	MYH2	-1.44403	0.0101595
ENSG00000168273	SMIM4	1.0764	0.0101863
ENSG00000241764	LOC101927974	1.17611	0.0101863
ENSG00000159685	CHCHD6	1.00253	0.0102379
ENSG00000239672	NME1	1.00985	0.0102614
ENSG00000166747	AP1G1	-0.581302	0.0103111
ENSG00000139178	C1RL	-0.876703	0.0103476
ENSG00000153214	TMEM87B	-0.63429	0.0103993
ENSG00000253327	RAD21-AS1	1.49978	0.0104032
ENSG00000132359	RAP1GAP2	-0.825838	0.0104441
ENSG00000251602	LOC100507437	0.94972	0.0104571
ENSG00000042062	RIPOR3	-0.775326	0.010674
ENSG00000133740	E2F5	-0.807457	0.0107116
ENSG00000149923	PPP4C	0.5775	0.0107144
ENSG00000116747	TROVE2	-0.575451	0.0107523
ENSG00000112306	RPS12	1.03542	0.0107524
ENSG00000134571	MYBPC3	-0.699102	0.0107524
ENSG00000225526	MKRN2OS	1.49154	0.0107524
ENSG00000178917	ZNF852	-1.4234	0.0107693
ENSG00000101132	PFDN4	1.10544	0.0108179
ENSG00000008086	CDKL5	-1.08922	0.0108612
ENSG00000058262	SEC61A1	-0.520145	0.0108612
ENSG00000105825	TFPI2	-1.07652	0.0108612
ENSG00000132326	PER2	0.988936	0.0108612
ENSG00000160801	PTH1R	-0.91322	0.0108612
ENSG00000160867	FGFR4	-1.41973	0.0108612
ENSG00000164530	PI16	1.03749	0.0108612
ENSG00000170113	NIPA1	-0.68168	0.0108612
ENSG00000172613	RAD9A	0.796873	0.0108612
ENSG00000175556	LONRF3	-1.40017	0.0108612
ENSG00000197965	MPZL1	-0.582842	0.0108612
ENSG00000213760	ATP6V1G2	1.09031	0.0108612
ENSG00000184060	ADAP2	-0.786816	0.0109079
ENSG00000112234	FBXL4	-0.622317	0.0109081
ENSG00000180773	SLC36A4	-0.835559	0.0109081
ENSG00000177189	RPS6KA3	-0.58006	0.0109202
ENSG00000141338	ABCA8	-0.944615	0.0109623
ENSG00000051128	HOMER3	0.718384	0.0109754
ENSG00000080845	DLGAP4	0.599119	0.0109754
ENSG00000161011	SQSTM1	0.500517	0.0110266
ENSG00000076864	RAP1GAP	-0.861351	0.0110294
ENSG00000152086	TUBA3E	-1.39794	0.0112036
ENSG00000166206	GABRB3	-1.21364	0.0113336
ENSG00000171016	PYGO1	-0.859231	0.0113336
ENSG00000128739	SNRPN	0.729877	0.0113741
ENSG00000067182	TNFRSF1A	-0.552824	0.011415
ENSG00000075618	FSCN1	0.815535	0.0114162
ENSG00000112837	TBX18	-1.10903	0.0114162
ENSG00000128585	MKLN1	-0.61532	0.0114162
ENSG00000168509	HJV	0.792439	0.0114162
ENSG00000179912	R3HDM2	0.656258	0.0114162
ENSG00000182372	CLN8	-0.598791	0.0114162
ENSG00000196655	TRAPPC4	0.585361	0.0114162
ENSG00000231770	TMEM44-AS1	1.17324	0.0114162
ENSG00000091140	DLD	0.375767	0.0114586
ENSG00000123560	PLP1	-0.964419	0.0114907
ENSG00000180530	NRIP1	-0.735587	0.0114907
ENSG00000161202	DVL3	0.637176	0.0115017
ENSG00000113712	CSNK1A1	-0.491029	0.0115153
ENSG00000085563	ABCB1	-1.18502	0.011521
ENSG00000102393	GLA	-0.677217	0.0115418
ENSG00000087074	PPP1R15A	0.548163	0.011545
ENSG00000151726	ACSL1	-0.637075	0.011545
ENSG00000152127	MGAT5	-0.776398	0.011545
ENSG00000127914	AKAP9	-0.937528	0.0115621
ENSG00000258311	BLOC1S1-RDH5	-1.20373	0.0115777
ENSG00000164919	COX6C	0.818313	0.011618
ENSG00000204381	LAYN	1.04181	0.0116251
ENSG00000128607	KLHDC10	-0.478751	0.0116316
ENSG00000082684	SEMA5B	0.795942	0.0116407
ENSG00000185262	UBALD2	0.722579	0.0116407
ENSG00000073756	PTGS2	-1.47785	0.0116881
ENSG00000129235	TXNDC17	0.897879	0.0116881
ENSG00000139567	ACVRL1	-0.68365	0.0116881
ENSG00000171467	ZNF318	-0.616564	0.0116881
ENSG00000096063	SRPK1	-0.50438	0.0116929
ENSG00000124882	EREG	-1.43447	0.0116929
ENSG00000163406	SLC15A2	-1.19975	0.0116929
ENSG00000171492	LRRC8D	-0.660276	0.0118601
ENSG00000144451	SPAG16	0.615374	0.0119017
ENSG00000085491	SLC25A24	-0.519723	0.0119631
ENSG00000154511	DIPK1A	-0.538744	0.0120536
ENSG00000121064	SCPEP1	-0.615475	0.0120571
ENSG00000138696	BMPR1B	-1.0892	0.0121277
ENSG00000257176	LOC100506606	-1.17046	0.0121277
ENSG00000158711	ELK4	-0.808122	0.0121375
ENSG00000272138	LINC01607	1.47321	0.0121375
ENSG00000174403	MIR1-1HG-AS1	0.631446	0.0121382
ENSG00000164823	OSGIN2	0.503238	0.0121775
ENSG00000181409	AATK	-1.06976	0.0121775
ENSG00000245532	NEAT1	-1.0727	0.0121775
ENSG00000168916	ZNF608	-0.787873	0.0122088
ENSG00000156414	TDRD9	-1.3313	0.0122157
ENSG00000152583	SPARCL1	-0.505271	0.0122254
ENSG00000164932	CTHRC1	1.14016	0.0123575
ENSG00000166750	SLFN5	-0.863008	0.0123575
ENSG00000115896	PLCL1	-0.525268	0.0124131
ENSG00000126458	RRAS	0.839139	0.0124131
ENSG00000155008	APOOL	-0.673885	0.0124131
ENSG00000197191	CYSRT1	1.46329	0.0124168
ENSG00000107165	TYRP1	0.99431	0.0124179
ENSG00000172296	SPTLC3	-0.944439	0.0124663
ENSG00000263155	MYZAP	-1.44769	0.0126091
ENSG00000079385	CEACAM1	-0.985155	0.0126136
ENSG00000129055	ANAPC13	0.614778	0.0127075
ENSG00000223784	LINP1	1.13874	0.0127075
ENSG00000112419	PHACTR2	-0.619554	0.012745
ENSG00000178695	KCTD12	-0.738892	0.0127608
ENSG00000172380	GNG12	-0.864516	0.0128162
ENSG00000143815	LBR	-0.801047	0.0128438
ENSG00000143493	INTS7	-0.558857	0.0128688
ENSG00000102804	TSC22D1	-0.460456	0.0128911
ENSG00000137825	ITPKA	-1.29263	0.0128935
ENSG00000116704	SLC35D1	-0.677399	0.0129179
ENSG00000001167	NFYA	-0.596385	0.0129904
ENSG00000078549	ADCYAP1R1	-1.41106	0.0130339
ENSG00000185009	AP3M1	-0.486991	0.0130339
ENSG00000174021	GNG5	0.7702	0.0130373
ENSG00000108510	MED13	-0.637153	0.0130578
ENSG00000112078	KCTD20	-0.412414	0.0130826
ENSG00000188897	LOC400499	1.29207	0.0131087
ENSG00000184672	RALYL	-1.35014	0.0131854
ENSG00000127252	HRASLS	0.928823	0.0132311
ENSG00000084090	STARD7	-0.579966	0.0132429
ENSG00000161265	U2AF1L4	0.921477	0.0132429
ENSG00000244482	LILRA6	-1.43541	0.0132429
ENSG00000254718	LOC101927702	1.45777	0.0132429
ENSG00000169020	ATP5ME	1.01509	0.013255
ENSG00000115944	COX7A2L	0.844029	0.01326
ENSG00000161048	NAPEPLD	-0.644421	0.01326
ENSG00000162437	RAVER2	-0.486497	0.0132642
ENSG00000171466	ZNF562	-0.549522	0.0132642
ENSG00000151689	INPP1	-0.442348	0.0133683
ENSG00000140876	NUDT7	0.635618	0.0134018
ENSG00000109738	GLRB	0.754291	0.0134273
ENSG00000160678	S100A1	0.853038	0.0134273
ENSG00000171148	TADA3	0.414718	0.0134273
ENSG00000102908	NFAT5	-0.996271	0.01348
ENSG00000025434	NR1H3	-0.678051	0.0135385
ENSG00000118515	SGK1	-0.728063	0.0135385
ENSG00000247416	LOC101928847	1.20817	0.0135385
ENSG00000119820	YIPF4	0.495588	0.0135433
ENSG00000215386	MIR99AHG	0.716116	0.0136804
ENSG00000170852	KBTBD2	-0.461365	0.0137556
ENSG00000171791	BCL2	0.822924	0.0137556
ENSG00000182831	C16orf72	-0.434384	0.0137556
ENSG00000043591	ADRB1	-0.816767	0.013771
ENSG00000203288	TDRKH-AS1	1.36732	0.013771
ENSG00000078053	AMPH	0.897256	0.013777
ENSG00000118873	RAB3GAP2	-0.488793	0.013835
ENSG00000198755	RPL10A	0.886564	0.0138448
ENSG00000149089	APIP	0.804296	0.0138575
ENSG00000180758	GPR157	-0.692937	0.0138975
ENSG00000175820	CCDC168	1.44236	0.013968
ENSG00000138709	LARP1B	-0.540097	0.013983
ENSG00000056586	RC3H2	-0.56795	0.0140263
ENSG00000178163	ZNF518B	-0.52321	0.0140324
ENSG00000113721	PDGFRB	-0.880852	0.0140523
ENSG00000228506	TSTD3	1.10321	0.0140523
ENSG00000160883	HK3	-1.18996	0.0140562
ENSG00000166428	PLD4	1.34702	0.0140562
ENSG00000137038	DMAC1	1.01549	0.0140641
ENSG00000006282	SPATA20	0.746195	0.0140947
ENSG00000137145	DENND4C	-0.6418	0.0140947
ENSG00000176994	SMCR8	-1.00423	0.0141261
ENSG00000133250	ZNF414	0.656573	0.0141414
ENSG00000198663	C6orf89	-0.656197	0.0142202
ENSG00000095303	PTGS1	-1.13674	0.0142268
ENSG00000132716	DCAF8	0.440118	0.0142268
ENSG00000180730	SHISA2	1.3106	0.0142304
ENSG00000142230	SAE1	0.415818	0.0142664
ENSG00000070193	FGF10	-1.44342	0.0142907
ENSG00000154262	ABCA6	-0.898119	0.0142911
ENSG00000176531	PHLDB3	0.843708	0.0143385
ENSG00000130203	APOE	0.942603	0.0144122
ENSG00000113658	SMAD5	-0.565745	0.0144526
ENSG00000172260	NEGR1	-1.02953	0.0144526
ENSG00000183690	EFHC2	-0.854062	0.0144526
ENSG00000215039	CD27-AS1	0.782631	0.0144526
ENSG00000158406	HIST1H4H	0.702492	0.0144567
ENSG00000169155	ZBTB43	-0.734027	0.0144592
ENSG00000130294	KIF1A	1.25849	0.0144792
ENSG00000171530	TBCA	0.866078	0.0144978
ENSG00000119943	PYROXD2	0.835149	0.0145315
ENSG00000165478	HEPACAM	-1.42735	0.0145315
ENSG00000172915	NBEA	-0.659328	0.0145315
ENSG00000108405	P2RX1	1.32866	0.0145589
ENSG00000176410	DNAJC30	0.723824	0.0145615
ENSG00000154654	NCAM2	-1.13961	0.014609
ENSG00000161013	MGAT4B	0.574711	0.0146131
ENSG00000147119	CHST7	-0.814344	0.014699
ENSG00000167113	COQ4	0.541454	0.014699
ENSG00000100852	ARHGAP5	-0.623745	0.014733
ENSG00000188735	TMEM120B	-0.607366	0.014733
ENSG00000049449	RCN1	-0.595717	0.0147805
ENSG00000051382	PIK3CB	-0.533973	0.0147805
ENSG00000109917	ZPR1	0.527328	0.0147805
ENSG00000128228	SDF2L1	0.82625	0.0147805
ENSG00000169385	RNASE2	-1.42772	0.0147805
ENSG00000179119	SPTY2D1	-0.51576	0.0147805
ENSG00000171135	JAGN1	0.707173	0.0147985
ENSG00000112280	COL9A1	1.31316	0.0148663
ENSG00000158122	PRXL2C	-0.592538	0.0148805
ENSG00000180822	PSMG4	0.927972	0.0148867
ENSG00000125611	CHCHD5	1.04704	0.0150634
ENSG00000064651	SLC12A2	-0.641016	0.0151033
ENSG00000116406	EDEM3	-0.661586	0.0151033
ENSG00000139209	SLC38A4	-1.43207	0.0151267
ENSG00000107679	PLEKHA1	-0.422031	0.0151334
ENSG00000180425	C11orf71	1.02983	0.0151795
ENSG00000197586	ENTPD6	-0.578396	0.0152083
ENSG00000205643	CDPF1	0.780057	0.0152083
ENSG00000181894	ZNF329	-0.488717	0.0152877
ENSG00000102755	FLT1	-0.922536	0.0152884
ENSG00000185215	TNFAIP2	-0.80128	0.0152884
ENSG00000104213	PDGFRL	-0.812733	0.0152893
ENSG00000196616	ADH1B	-1.08196	0.0152991
ENSG00000250786	SNHG18	1.01801	0.0153296
ENSG00000058804	NDC1	-0.588992	0.0153613
ENSG00000151422	FER	-0.74352	0.0155063
ENSG00000054938	CHRDL2	-1.42647	0.0156442
ENSG00000100030	MAPK1	-0.420909	0.0156442
ENSG00000136689	IL1RN	-1.42624	0.0156487
ENSG00000214087	ARL16	1.02526	0.0156487
ENSG00000020129	NCDN	0.648284	0.0156516
ENSG00000257093	KIAA1147	-0.733998	0.0156516
ENSG00000056736	IL17RB	-1.4256	0.0156721
ENSG00000125266	EFNB2	-0.690715	0.0156721
ENSG00000183454	GRIN2A	-1.21834	0.0156721
ENSG00000149575	SCN2B	0.682561	0.01568
ENSG00000180592	SKIDA1	-0.928432	0.0157195
ENSG00000143194	MAEL	1.09045	0.0157612
ENSG00000007168	PAFAH1B1	-0.508623	0.0158245
ENSG00000118217	ATF6	-0.491691	0.0158245
ENSG00000111785	RIC8B	-0.43176	0.0158399
ENSG00000119285	HEATR1	-0.63847	0.0158399
ENSG00000203808	BVES-AS1	0.928464	0.0158399
ENSG00000127838	PNKD	0.805264	0.0158454
ENSG00000134602	STK26	-1.05641	0.0158454
ENSG00000142207	URB1	0.637529	0.0158454
ENSG00000165698	SPACA9	0.665885	0.0158454
ENSG00000175874	CREG2	1.42279	0.0158454
ENSG00000249669	CARMN	-1.0065	0.0158454
ENSG00000104154	SLC30A4	-0.700486	0.0158817
ENSG00000138029	HADHB	-0.53878	0.0158817
ENSG00000151327	FAM177A1	0.633965	0.0159149
ENSG00000257315	ZC3H11A	-1.32238	0.0159483
ENSG00000130669	PAK4	0.560741	0.0160271
ENSG00000137269	LRRC1	0.665961	0.0160271
ENSG00000165168	CYBB	-1.03483	0.0160271
ENSG00000183023	SLC8A1	-0.596492	0.0160271
ENSG00000145934	TENM2	-0.737156	0.0160822
ENSG00000159212	CLIC6	1.04444	0.0160822
ENSG00000124701	APOBEC2	-0.636152	0.0160982
ENSG00000148339	SLC25A25	-0.772944	0.016197
ENSG00000138071	ACTR2	-0.502827	0.0163516
ENSG00000164683	HEY1	0.630807	0.0163675
ENSG00000196531	NACA	0.57747	0.0163711
ENSG00000104848	KCNA7	-1.40649	0.0163771
ENSG00000257242	LINC01619	1.24008	0.016389
ENSG00000174899	PQLC2L	-1.33539	0.016405
ENSG00000138760	SCARB2	-0.434922	0.016428
ENSG00000261253	LOC100287036	-1.41132	0.0165056
ENSG00000119673	ACOT2	0.667269	0.0165222
ENSG00000185436	IFNLR1	-1.04368	0.0165821
ENSG00000127540	UQCR11	0.957073	0.0166778
ENSG00000099822	HCN2	0.80219	0.0167
ENSG00000196323	ZBTB44	-0.522047	0.0167
ENSG00000178057	NDUFAF3	0.5436	0.0167406
ENSG00000112394	SLC16A10	-0.924716	0.0167407
ENSG00000172466	ZNF24	-0.427806	0.0167407
ENSG00000074201	CLNS1A	0.574074	0.0167857
ENSG00000105609	LILRB5	-1.10012	0.0169469
ENSG00000128052	KDR	-0.792179	0.0169717
ENSG00000146066	HIGD2A	0.598156	0.017013
ENSG00000142279	WTIP	0.694224	0.0171397
ENSG00000152952	PLOD2	-0.709099	0.0171571
ENSG00000185608	MRPL40	0.782767	0.0171611
ENSG00000164896	FASTK	0.582439	0.0171867
ENSG00000273148	LOC100270804	1.24068	0.0171939
ENSG00000100979	PLTP	-0.832886	0.0171973
ENSG00000105855	ITGB8	-1.17592	0.0172191
ENSG00000183876	ARSI	-1.39207	0.0172264
ENSG00000107014	RLN2	1.40729	0.0172772
ENSG00000162946	DISC1	-0.885136	0.0172772
ENSG00000115525	ST3GAL5	-1.12685	0.0173243
ENSG00000156466	GDF6	1.25826	0.0173359
ENSG00000171017	LRRC8E	-1.34432	0.0173561
ENSG00000101608	MYL12A	1.27477	0.0173586
ENSG00000102786	INTS6	-0.467893	0.0173862
ENSG00000105204	DYRK1B	0.827033	0.0173862
ENSG00000162755	KLHDC9	0.964459	0.0174768
ENSG00000126785	RHOJ	-0.61612	0.0174792
ENSG00000136381	IREB2	-0.568372	0.0174792
ENSG00000239521	CASTOR3	-1.08083	0.0174792
ENSG00000108963	DPH1	0.578288	0.0175434
ENSG00000125967	NECAB3	0.571208	0.017599
ENSG00000128656	CHN1	0.650335	0.017599
ENSG00000105778	AVL9	-0.56305	0.0176346
ENSG00000227729	RD3L	0.977928	0.0176825
ENSG00000198146	ZNF770	-0.583196	0.0176926
ENSG00000113494	PRLR	-1.25298	0.0176989
ENSG00000165197	VEGFD	-1.09827	0.0178661
ENSG00000064687	ABCA7	-0.925724	0.0178811
ENSG00000186908	ZDHHC17	-0.628972	0.0179553
ENSG00000134285	FKBP11	-1.07016	0.017978
ENSG00000138593	SECISBP2L	-0.629985	0.0180453
ENSG00000139168	ZCRB1	0.812877	0.0180453
ENSG00000144285	SCN1A	-1.39812	0.0180453
ENSG00000155542	SETD9	1.00725	0.0180453
ENSG00000166337	TAF10	0.787253	0.0180453
ENSG00000011105	TSPAN9	0.60108	0.0180855
ENSG00000115762	PLEKHB2	-0.509544	0.0180982
ENSG00000101577	LPIN2	-0.666807	0.0181212
ENSG00000169710	FASN	-1.05779	0.0181486
ENSG00000145012	LPP	-0.802791	0.0182367
ENSG00000186350	RXRA	-0.645856	0.018281
ENSG00000111850	SMIM8	0.849371	0.0182831
ENSG00000129003	VPS13C	-0.821691	0.0183467
ENSG00000158008	EXTL1	1.04618	0.0183467
ENSG00000108395	TRIM37	-0.354662	0.0183613
ENSG00000151779	NBAS	-0.595213	0.0184922
ENSG00000102837	OLFM4	-1.38436	0.0185067
ENSG00000000419	DPM1	0.716407	0.0185322
ENSG00000164104	HMGB2	0.717344	0.0185329
ENSG00000152242	C18orf25	-0.40068	0.0185784
ENSG00000077009	NMRK2	0.837235	0.0185861
ENSG00000182732	RGS6	0.743296	0.0185861
ENSG00000272009	LOC102724889	1.38314	0.0185861
ENSG00000173511	VEGFB	0.561281	0.0185911
ENSG00000124120	TTPAL	-0.844531	0.0186109
ENSG00000065308	TRAM2	-0.537773	0.0186239
ENSG00000137962	ARHGAP29	-0.533659	0.0186694
ENSG00000140090	SLC24A4	-1.35464	0.0186789
ENSG00000167646	DNAAF3	1.10462	0.0188152
ENSG00000130414	NDUFA10	0.404449	0.0189778
ENSG00000105997	HOXA3	-1.31436	0.0190157
ENSG00000110880	CORO1C	-0.393065	0.0190157
ENSG00000152223	EPG5	-0.639133	0.0190157
ENSG00000145919	BOD1	0.784091	0.0190739
ENSG00000146674	IGFBP3	0.543796	0.0191148
ENSG00000138792	ENPEP	-0.965614	0.0191331
ENSG00000100504	PYGL	-0.676669	0.0191626
ENSG00000143382	ADAMTSL4	-0.984347	0.0191698
ENSG00000162511	LAPTM5	-0.794691	0.0191698
ENSG00000157985	AGAP1	-0.685568	0.0192391
ENSG00000272047	GTF2H5	0.877214	0.0192391
ENSG00000135919	SERPINE2	1.00243	0.0193644
ENSG00000137941	TTLL7	0.960838	0.0193644
ENSG00000145979	TBC1D7	0.856994	0.0193644
ENSG00000187109	NAP1L1	0.440508	0.0193644
ENSG00000105617	LENG1	0.565313	0.0194171
ENSG00000007062	PROM1	1.05845	0.0194762
ENSG00000138587	MNS1	1.1445	0.0194762
ENSG00000134440	NARS	0.327814	0.0194949
ENSG00000134548	SPX	0.704971	0.0195873
ENSG00000157450	RNF111	-0.480752	0.0195873
ENSG00000259687	LINC01220	1.30349	0.0196671
ENSG00000167635	ZNF146	-0.585579	0.0197729
ENSG00000181631	P2RY13	1.25912	0.0197816
ENSG00000058673	ZC3H11A	-0.572417	0.0199418
ENSG00000106266	SNX8	0.525141	0.0199418
ENSG00000178761	FAM219B	-0.441295	0.0200386
ENSG00000169762	TAPT1	-0.407178	0.0200434
ENSG00000151131	C12orf45	0.984796	0.0200606
ENSG00000033122	LRRC7	-1.37928	0.0201401
ENSG00000136938	ANP32B	0.344814	0.0202748
ENSG00000143847	PPFIA4	0.637253	0.0202877
ENSG00000076770	MBNL3	-0.974175	0.0203098
ENSG00000126709	IFI6	0.845095	0.0203098
ENSG00000163344	PMVK	-0.556647	0.0203098
ENSG00000171792	RHNO1	0.78679	0.0203098
ENSG00000237765	FAM200B	0.860885	0.0203735
ENSG00000124205	EDN3	1.37614	0.0204579
ENSG00000085832	EPS15	-0.386843	0.0204832
ENSG00000136925	TSTD2	-0.531944	0.0205037
ENSG00000157077	ZFYVE9	-0.688591	0.0205623
ENSG00000172869	DMXL1	-0.586235	0.0205886
ENSG00000185847	LINC01405	1.05247	0.0206166
ENSG00000206337	HCP5	-0.6793	0.0206166
ENSG00000248144	ADH1C	-1.11594	0.0206166
ENSG00000168781	PPIP5K1	0.576999	0.0206306
ENSG00000170989	S1PR1	0.386267	0.0206335
ENSG00000105643	ARRDC2	0.827391	0.0206833
ENSG00000254598	CSNK2A3	-1.33497	0.0207335
ENSG00000166123	GPT2	-0.744385	0.0207862
ENSG00000007255	TRAPPC6A	0.84427	0.0209735
ENSG00000204568	MRPS18B	0.491815	0.0209735
ENSG00000253320	AZIN1-AS1	1.10485	0.0209735
ENSG00000258498	DIO3OS	-1.30505	0.0209735
ENSG00000176971	FIBIN	0.852757	0.0210869
ENSG00000197982	C1orf122	0.799236	0.0211931
ENSG00000258708	SLC25A21-AS1	1.06219	0.0212391
ENSG00000213853	EMP2	-0.445364	0.0213613
ENSG00000166169	POLL	0.547641	0.0214753
ENSG00000003436	TFPI	-0.761004	0.0215422
ENSG00000109846	CRYAB	0.500925	0.0215422
ENSG00000132825	PPP1R3D	-0.519266	0.0215422
ENSG00000135083	CCNJL	-0.564423	0.0215422
ENSG00000147649	MTDH	-0.477091	0.0215422
ENSG00000163762	TM4SF18	-0.549773	0.0215422
ENSG00000167702	KIFC2	-0.713152	0.0215422
ENSG00000234438	KBTBD13	-0.921135	0.0215422
ENSG00000245060	LINC00847	0.588861	0.0215422
ENSG00000136936	XPA	0.576135	0.021588
ENSG00000077147	TM9SF3	-0.462511	0.021597
ENSG00000089356	FXYD3	-1.35418	0.0216991
ENSG00000100448	CTSG	-1.25833	0.0216991
ENSG00000147124	ZNF41	-0.573326	0.0216991
ENSG00000197971	MBP	0.752378	0.0216991
ENSG00000108823	SGCA	0.543353	0.0217115
ENSG00000141664	ZCCHC2	-0.746311	0.0217115
ENSG00000162383	SLC1A7	1.27404	0.0217115
ENSG00000171724	VAT1L	0.724836	0.0217115
ENSG00000137218	FRS3	0.643105	0.0217455
ENSG00000184076	UQCR10	0.878629	0.0218642
ENSG00000099810	MTAP	-0.535065	0.0219395
ENSG00000136731	UGGT1	-0.709333	0.0220086
ENSG00000174485	DENND4A	-0.642632	0.0220086
ENSG00000164818	DNAAF5	0.634487	0.0220267
ENSG00000183682	BMP8A	1.3227	0.0221144
ENSG00000112695	COX7A2	1.10664	0.0221615
ENSG00000143499	SMYD2	0.819516	0.0221684
ENSG00000166582	CENPV	-0.865767	0.0221684
ENSG00000189171	S100A13	1.14572	0.0221684
ENSG00000117480	FAAH	-0.978344	0.022221
ENSG00000178860	MSC	-0.880853	0.0224711
ENSG00000187134	AKR1C1	-0.878371	0.0225231
ENSG00000186834	HEXIM1	-0.652879	0.0226107
ENSG00000184575	XPOT	-0.41301	0.0227155
ENSG00000116885	OSCP1	0.699631	0.0227523
ENSG00000143479	DYRK3	-0.713444	0.0227568
ENSG00000173141	MRPL57	0.90153	0.0227568
ENSG00000148450	MSRB2	0.58125	0.0227799
ENSG00000185722	ANKFY1	-0.587581	0.0227799
ENSG00000248449	PCDHGB8P	-1.35407	0.0227799
ENSG00000140563	MCTP2	-1.32298	0.0227977
ENSG00000164924	YWHAZ	-0.404803	0.0228167
ENSG00000185201	IFITM2	-0.616021	0.0228167
ENSG00000100342	APOL1	-0.772985	0.0229013
ENSG00000159403	C1R	-0.97411	0.0229029
ENSG00000246223	LINC01550	-1.10613	0.0230583
ENSG00000047578	KIAA0556	0.784957	0.0230908
ENSG00000149308	NPAT	-0.685216	0.0231531
ENSG00000140519	RHCG	1.35395	0.0231717
ENSG00000258920	FOXN3-AS1	1.13787	0.0231815
ENSG00000075785	RAB7A	0.395716	0.0232335
ENSG00000155545	MIER3	-0.548234	0.0232335
ENSG00000162585	FAAP20	0.755493	0.0232335
ENSG00000129194	SOX15	1.03805	0.0232434
ENSG00000152128	TMEM163	1.3054	0.0234179
ENSG00000134352	IL6ST	-0.64287	0.0234815
ENSG00000170891	CYTL1	1.26806	0.0234929
ENSG00000141738	GRB7	-1.25429	0.0235247
ENSG00000178726	THBD	-0.685346	0.0235247
ENSG00000196150	ZNF250	-0.612978	0.0235997
ENSG00000177853	ZNF518A	-0.661566	0.0237051
ENSG00000069399	BCL3	-0.786241	0.023779
ENSG00000246100	LINC00900	1.10885	0.023779
ENSG00000198824	CHAMP1	-0.55956	0.023945
ENSG00000256537	SMIM10L1	0.832676	0.0239794
ENSG00000163827	LRRC2	-0.593405	0.024002
ENSG00000106688	SLC1A1	-0.879189	0.0241007
ENSG00000171503	ETFDH	-0.514233	0.0241007
ENSG00000062524	LTK	-1.34589	0.0241281
ENSG00000163932	PRKCD	-0.758387	0.024157
ENSG00000110723	EXPH5	-1.33491	0.0241661
ENSG00000111678	C12orf57	0.94377	0.0241661
ENSG00000143061	IGSF3	-0.870925	0.0241661
ENSG00000253537	PCDHGA7	-1.1464	0.0241661
ENSG00000066382	MPPED2	-0.699272	0.0241972
ENSG00000175352	NRIP3	1.06174	0.0241972
ENSG00000141540	TTYH2	-0.619396	0.0242336
ENSG00000070759	TESK2	-0.890776	0.0242432
ENSG00000119559	C19orf25	0.591666	0.02428
ENSG00000149743	TRPT1	0.643419	0.02428
ENSG00000181163	NPM1	0.722854	0.02428
ENSG00000153944	MSI2	-0.409968	0.0243273
ENSG00000175471	MCTP1	-0.792378	0.0243278
ENSG00000180398	MCFD2	-0.504127	0.0243278
ENSG00000183648	NDUFB1	0.987619	0.0243278
ENSG00000107521	HPS1	0.597784	0.0243346
ENSG00000135334	AKIRIN2	0.450448	0.0244655
ENSG00000166046	TCP11L2	-0.559629	0.0244877
ENSG00000134240	HMGCS2	-1.3431	0.0245172
ENSG00000123983	ACSL3	-0.438343	0.0245638
ENSG00000155252	PI4K2A	0.541467	0.0246792
ENSG00000144730	IL17RD	-1.03095	0.0247139
ENSG00000161558	TMEM143	0.582002	0.0247191
ENSG00000167554	ZNF610	0.819856	0.0249714
ENSG00000203999	LINC01270	1.12957	0.0250402
ENSG00000077522	ACTN2	0.570095	0.0250846
ENSG00000100815	TRIP11	-0.657607	0.0251612
ENSG00000139329	LUM	1.09436	0.025173
ENSG00000102317	RBM3	0.625433	0.0252575
ENSG00000131943	C19orf12	-0.434163	0.0253168
ENSG00000122203	KIAA1191	0.445157	0.0253769
ENSG00000007866	TEAD3	0.497128	0.0253857
ENSG00000112759	SLC29A1	-0.573795	0.0253857
ENSG00000272323	LOC101929704	1.20752	0.025403
ENSG00000103148	NPRL3	0.601165	0.0254609
ENSG00000001561	ENPP4	-0.670823	0.0256859
ENSG00000137070	IL11RA	0.551193	0.0257489
ENSG00000141956	PRDM15	-0.843708	0.0257881
ENSG00000265096	C1QTNF1-AS1	1.1757	0.025798
ENSG00000170919	TPT1-AS1	0.559929	0.0258182
ENSG00000260231	KDM7A-DT	0.503047	0.0258182
ENSG00000049130	KITLG	-0.822302	0.0258479
ENSG00000258949	LOC101927418	1.31396	0.0258774
ENSG00000157617	C2CD2	-0.711889	0.0259735
ENSG00000117595	IRF6	0.746102	0.0259883
ENSG00000143811	PYCR2	0.543331	0.0259883
ENSG00000143751	SDE2	-0.552716	0.0260371
ENSG00000173432	SAA1	-1.17302	0.0261817
ENSG00000147251	DOCK11	-0.926173	0.0262419
ENSG00000240344	PPIL3	0.823335	0.0262419
ENSG00000151092	NGLY1	-0.527092	0.0262977
ENSG00000071539	TRIP13	-1.29799	0.0263382
ENSG00000248599	FLJ42969	1.25098	0.0263654
ENSG00000143374	TARS2	0.489379	0.0265237
ENSG00000147650	LRP12	-0.451873	0.0265634
ENSG00000026297	RNASET2	0.674033	0.0265866
ENSG00000145220	LYAR	0.673292	0.0265962
ENSG00000072062	PRKACA	0.440473	0.0267287
ENSG00000134138	MEIS2	-0.463231	0.0267394
ENSG00000146555	SDK1	-1.10321	0.0267758
ENSG00000163170	BOLA3	0.900362	0.0267758
ENSG00000115604	IL18R1	-1.17037	0.0268363
ENSG00000178568	ERBB4	-0.894315	0.0268363
ENSG00000161203	AP2M1	0.448068	0.0268526
ENSG00000073584	SMARCE1	0.455497	0.0268704
ENSG00000197111	PCBP2	0.451591	0.0268704
ENSG00000102007	PLP2	-0.665616	0.0270005
ENSG00000167283	ATP5MG	0.827271	0.0270217
ENSG00000205269	TMEM170B	-0.651017	0.0270254
ENSG00000253873	PCDHGA11	-1.22872	0.0270254
ENSG00000114923	SLC4A3	-0.586232	0.0270585
ENSG00000115539	PDCL3	0.532895	0.0270698
ENSG00000136244	IL6	-1.31669	0.0270916
ENSG00000147419	CCDC25	0.351857	0.0270916
ENSG00000101463	SYNDIG1	0.603318	0.0271318
ENSG00000188917	TRMT2B	-0.449378	0.0271318
ENSG00000101204	CHRNA4	-1.18272	0.0271543
ENSG00000181026	AEN	-0.650401	0.0271663
ENSG00000172663	TMEM134	0.768237	0.0272002
ENSG00000237037	NDUFA6-DT	-0.76495	0.0272002
ENSG00000160221	GATD3A	0.455618	0.0273111
ENSG00000101413	RPRD1B	-0.487978	0.0273314
ENSG00000112972	HMGCS1	-0.612788	0.0273314
ENSG00000149289	ZC3H12C	-0.634893	0.0273314
ENSG00000157445	CACNA2D3	-0.727166	0.0273314
ENSG00000163293	NIPAL1	-1.28535	0.0273314
ENSG00000172292	CERS6	-0.549632	0.0273314
ENSG00000187189	TSPYL4	-0.47408	0.0273314
ENSG00000197956	S100A6	0.8947	0.0273873
ENSG00000077157	PPP1R12B	-0.688388	0.0274063
ENSG00000171984	SHLD1	0.838941	0.0274187
ENSG00000117122	MFAP2	0.88251	0.0274275
ENSG00000172493	AFF1	-0.59888	0.0275026
ENSG00000099958	DERL3	1.00441	0.0275176
ENSG00000110777	POU2AF1	-1.24636	0.0275176
ENSG00000135940	COX5B	0.820674	0.0275176
ENSG00000151617	EDNRA	0.520345	0.0275176
ENSG00000167034	NKX3-1	-0.67789	0.0275176
ENSG00000198542	ITGBL1	1.07648	0.0275176
ENSG00000251279	SMIM15-AS1	1.27278	0.0275598
ENSG00000128581	IFT22	0.681487	0.027661
ENSG00000009335	UBE3C	-0.544903	0.0277022
ENSG00000197594	ENPP1	-0.672252	0.0277022
ENSG00000139722	VPS37B	-0.432536	0.0277296
ENSG00000170549	IRX1	1.29327	0.0277296
ENSG00000125457	MIF4GD	0.476521	0.0277466
ENSG00000144837	PLA1A	-0.994326	0.0278731
ENSG00000156411	ATP5MPL	0.907757	0.0278731
ENSG00000172508	CARNS1	0.76358	0.0278731
ENSG00000168993	CPLX1	1.00254	0.0279125
ENSG00000115593	SMYD1	-0.675452	0.0279148
ENSG00000143776	CDC42BPA	-0.63199	0.0279148
ENSG00000184924	PTRHD1	0.955303	0.0280685
ENSG00000187608	ISG15	1.08094	0.0281794
ENSG00000182957	SPATA13	-0.751745	0.0282025
ENSG00000072364	AFF4	-0.671086	0.0282371
ENSG00000204520	MICA	0.887582	0.0282556
ENSG00000140465	CYP1A1	-1.31431	0.0282683
ENSG00000155324	GRAMD2B	-0.588216	0.0282683
ENSG00000224699	LAMTOR5-AS1	1.23126	0.0282967
ENSG00000261195	LOC105371115	1.3124	0.028331
ENSG00000109771	LRP2BP	-0.988837	0.0283604
ENSG00000102547	CAB39L	-0.576465	0.0284462
ENSG00000135269	TES	-0.705024	0.0284845
ENSG00000138755	CXCL9	1.08245	0.0284845
ENSG00000171159	C9orf16	0.764091	0.0284845
ENSG00000224397	SMIM25	-1.27816	0.0285324
ENSG00000042753	AP2S1	0.577173	0.0285702
ENSG00000224729	PCOLCE-AS1	1.19756	0.0285702
ENSG00000241837	ATP5PO	0.960152	0.0285702
ENSG00000159348	CYB5R1	0.567581	0.0287364
ENSG00000166825	ANPEP	-1.08393	0.0288407
ENSG00000231721	LINC-PINT	0.832248	0.0290069
ENSG00000146263	MMS22L	-0.986237	0.0290736
ENSG00000166922	SCG5	1.25923	0.0291873
ENSG00000117395	EBNA1BP2	0.493094	0.029196
ENSG00000127948	POR	-0.654332	0.029196
ENSG00000124214	STAU1	0.394112	0.029205
ENSG00000146802	TMEM168	-0.508782	0.029205
ENSG00000154258	ABCA9	-0.946197	0.029205
ENSG00000069122	ADGRF5	-0.661197	0.0292413
ENSG00000101425	BPI	1.30378	0.0296402
ENSG00000146414	SHPRH	-0.681431	0.0296402
ENSG00000075292	ZNF638	-0.629874	0.0297125
ENSG00000189350	TOGARAM2	-1.23523	0.0297169
ENSG00000161281	COX7A1	0.864103	0.0297845
ENSG00000169436	COL22A1	1.29633	0.0301187
ENSG00000169641	LUZP1	-0.578377	0.0301187
ENSG00000067369	TP53BP1	-0.615236	0.0301758
ENSG00000110844	PRPF40B	0.511984	0.0301884
ENSG00000100207	TCF20	-0.688119	0.0301916
ENSG00000254901	BORCS8	0.757926	0.0302476
ENSG00000135218	CD36	-0.598467	0.030386
ENSG00000144815	NXPE3	-0.501624	0.030386
ENSG00000153904	DDAH1	0.819019	0.0304285
ENSG00000171970	ZNF57	0.920662	0.0304285
ENSG00000125676	THOC2	-0.516053	0.0306978
ENSG00000189292	ALKAL2	1.21239	0.0306978
ENSG00000196704	AMZ2	0.659318	0.0306978
ENSG00000239335	LLPH-DT	1.29383	0.0307387
ENSG00000221944	TIGD1	0.879942	0.0307949
ENSG00000148943	LIN7C	-0.549553	0.0308945
ENSG00000124459	ZNF45	-0.716424	0.0309114
ENSG00000153820	SPHKAP	-0.681988	0.0311661
ENSG00000175084	DES	0.632232	0.0311734
ENSG00000163235	TGFA	-1.26054	0.0312919
ENSG00000169242	EFNA1	0.657174	0.0314563
ENSG00000179083	FAM133A	1.08486	0.0314563
ENSG00000077232	DNAJC10	-0.451767	0.0314839
ENSG00000143127	ITGA10	0.841069	0.0314839
ENSG00000151388	ADAMTS12	-1.06579	0.0314839
ENSG00000167657	DAPK3	0.643955	0.0314839
ENSG00000172831	CES2	-0.688194	0.0314839
ENSG00000174886	NDUFA11	0.990641	0.0314839
ENSG00000137310	TCF19	-0.685256	0.0314953
ENSG00000164050	PLXNB1	-0.463962	0.0314953
ENSG00000176204	LRRTM4	-1.25432	0.0314953
ENSG00000163864	NMNAT3	0.582408	0.0315575
ENSG00000261787	TCF24	-1.28545	0.0315575
ENSG00000186615	KTN1-AS1	0.80589	0.0315899
ENSG00000138379	MSTN	1.28747	0.0317211
ENSG00000183828	NUDT14	0.825685	0.0317529
ENSG00000196465	MYL6B	0.600934	0.0317529
ENSG00000213465	ARL2	0.668522	0.0317529
ENSG00000170892	TSEN34	0.551932	0.0317897
ENSG00000136478	TEX2	-0.447306	0.0318183
ENSG00000007047	MARK4	0.525207	0.0318259
ENSG00000111110	PPM1H	-0.691271	0.0318259
ENSG00000137947	GTF2B	0.79759	0.0318259
ENSG00000156642	NPTN	-0.423216	0.0318259
ENSG00000113396	SLC27A6	0.811285	0.0320091
ENSG00000215018	COL28A1	-1.28208	0.0320257
ENSG00000184992	BRI3BP	-0.488485	0.0320258
ENSG00000127125	PPCS	0.679436	0.032117
ENSG00000102032	RENBP	0.621389	0.0321203
ENSG00000139116	KIF21A	-0.593973	0.032154
ENSG00000184677	ZBTB40	-0.651697	0.0321598
ENSG00000135472	FAIM2	-1.28981	0.0321722
ENSG00000166912	MTMR10	-0.406601	0.0322044
ENSG00000133835	HSD17B4	-0.312656	0.0323556
ENSG00000129493	HEATR5A	-0.431473	0.0323821
ENSG00000004799	PDK4	-1.0746	0.0324512
ENSG00000162493	PDPN	-0.702277	0.0324512
ENSG00000235453	SMIM27	1.00067	0.0324512
ENSG00000070778	PTPN21	0.558696	0.0325118
ENSG00000100626	GALNT16	-0.630286	0.0325118
ENSG00000106610	STAG3L4	0.868843	0.032594
ENSG00000196876	SCN8A	-1.23717	0.0326113
ENSG00000239467	ERICH2	0.996566	0.0326778
ENSG00000117461	PIK3R3	-0.601081	0.0327955
ENSG00000139180	NDUFA9	0.688968	0.0327955
ENSG00000143167	GPA33	1.02158	0.0327955
ENSG00000176340	COX8A	0.633076	0.0327955
ENSG00000119699	TGFB3	0.593813	0.0328072
ENSG00000178449	COX14	1.07116	0.0328072
ENSG00000107562	CXCL12	-0.733707	0.0329557
ENSG00000177225	GATD1	0.399586	0.0329913
ENSG00000053371	AKR7A2	0.56452	0.0330732
ENSG00000134954	ETS1	-0.60599	0.0331083
ENSG00000083844	ZNF264	-0.803991	0.0331162
ENSG00000148600	CDHR1	-1.19081	0.0331321
ENSG00000163814	CDCP1	-1.27683	0.0331321
ENSG00000078674	PCM1	-0.534973	0.0331453
ENSG00000137177	KIF13A	0.599994	0.0331453
ENSG00000198795	ZNF521	-0.827732	0.0332193
ENSG00000158161	EYA3	-0.468686	0.0332451
ENSG00000125779	PANK2	-0.492332	0.0333909
ENSG00000254703	SENCR	-1.07647	0.0333909
ENSG00000157578	LCA5L	1.28032	0.033449
ENSG00000163467	TSACC	1.27365	0.033449
ENSG00000124813	RUNX2	0.926502	0.0335777
ENSG00000120457	KCNJ5	-0.781332	0.0335999
ENSG00000169100	SLC25A6	0.545551	0.0336391
ENSG00000167747	C19orf48	0.623359	0.0336806
ENSG00000166275	BORCS7	0.573021	0.0338601
ENSG00000198400	NTRK1	-1.17486	0.0338607
ENSG00000082196	C1QTNF3	1.23073	0.0338799
ENSG00000113594	LIFR	-0.741004	0.0339213
ENSG00000104812	GYS1	0.524114	0.0341266
ENSG00000170954	ZNF415	0.665982	0.0341266
ENSG00000216895	LOC100506302	1.10207	0.034161
ENSG00000101335	MYL9	0.551397	0.0341791
ENSG00000136720	HS6ST1	-0.634967	0.0341919
ENSG00000155957	TMBIM4	0.902843	0.0343427
ENSG00000107551	RASSF4	0.427054	0.0344206
ENSG00000106714	CNTNAP3	-1.1627	0.0344935
ENSG00000111725	PRKAB1	0.462361	0.0344935
ENSG00000218336	TENM3	-0.884274	0.0344935
ENSG00000102034	ELF4	-0.815953	0.0345398
ENSG00000188582	PAQR9	-0.657428	0.0345843
ENSG00000117632	STMN1	0.771702	0.0346539
ENSG00000213160	KLHL23	-0.532555	0.0348089
ENSG00000115904	SOS1	-0.58338	0.0348417
ENSG00000198909	MAP3K3	0.413223	0.0348417
ENSG00000124126	PREX1	-0.607073	0.0348429
ENSG00000086619	ERO1B	-0.581317	0.0348784
ENSG00000205155	PSENEN	0.612409	0.0349221
ENSG00000169083	AR	-0.618746	0.0349834
ENSG00000163960	UBXN7	-0.709261	0.0351387
ENSG00000164758	MED30	0.763133	0.0351387
ENSG00000162009	SSTR5	-1.23747	0.0352477
ENSG00000177575	CD163	-1.12609	0.0352477
ENSG00000123700	KCNJ2	-0.640357	0.0353847
ENSG00000176597	B3GNT5	0.783815	0.035391
ENSG00000224020	MIR181A2HG	1.26813	0.035391
ENSG00000145907	G3BP1	-0.381187	0.0354306
ENSG00000167995	BEST1	-0.880158	0.0354677
ENSG00000237523	LINC00857	1.23255	0.035593
ENSG00000073464	CLCN4	-0.642333	0.0357118
ENSG00000104824	HNRNPL	-0.343603	0.0357118
ENSG00000165678	GHITM	0.501802	0.0357118
ENSG00000167676	PLIN4	-0.759499	0.0357118
ENSG00000171204	TMEM126B	0.953121	0.0357118
ENSG00000178776	C5orf46	1.2057	0.0357118
ENSG00000251580	LINC02482	1.10005	0.0357118
ENSG00000020577	SAMD4A	0.512615	0.0358368
ENSG00000175334	BANF1	0.658705	0.0358369
ENSG00000122126	OCRL	-0.550739	0.0359901
ENSG00000151692	RNF144A	-0.691924	0.0360088
ENSG00000034713	GABARAPL2	0.778859	0.0360342
ENSG00000116991	SIPA1L2	-0.704578	0.0362215
ENSG00000110330	BIRC2	-0.490362	0.0362809
ENSG00000248174	LINC02268	1.25854	0.0362809
ENSG00000188938	FAM120AOS	0.369658	0.0362969
ENSG00000103569	AQP9	-1.2602	0.0363629
ENSG00000139832	RAB20	0.591677	0.0364669
ENSG00000187556	NANOS3	1.23385	0.0365042
ENSG00000155085	AK9	-0.637576	0.0365065
ENSG00000174640	SLCO2A1	-0.926838	0.0365665
ENSG00000110344	UBE4A	-0.452615	0.0365712
ENSG00000127083	OMD	1.06241	0.036573
ENSG00000116221	MRPL37	0.424806	0.0366172
ENSG00000186577	SMIM29	0.892476	0.0366217
ENSG00000005238	FAM214B	0.462784	0.0368044
ENSG00000108591	DRG2	0.341328	0.0368224
ENSG00000126391	FRMD8	0.439797	0.0368224
ENSG00000126602	TRAP1	0.449937	0.0368224
ENSG00000172500	FIBP	0.500261	0.0368224
ENSG00000021826	CPS1	-0.777599	0.0369393
ENSG00000124818	OPN5	-1.21363	0.0369797
ENSG00000198734	F5	-1.25025	0.0370666
ENSG00000185164	NOMO2	-0.724996	0.0370727
ENSG00000154889	MPPE1	0.554023	0.0371306
ENSG00000178096	BOLA1	0.762662	0.0371371
ENSG00000188994	ZNF292	-0.665819	0.0371618
ENSG00000113194	FAF2	-0.538202	0.0372137
ENSG00000011422	PLAUR	-0.958468	0.0374003
ENSG00000154079	SDHAF4	0.992059	0.0375058
ENSG00000116254	CHD5	1.15537	0.0375448
ENSG00000159140	SON	-0.533276	0.0375689
ENSG00000149557	FEZ1	0.640148	0.0375816
ENSG00000005022	SLC25A5	0.85733	0.0375846
ENSG00000121005	CRISPLD1	1.1338	0.0375852
ENSG00000123178	SPRYD7	0.436629	0.0376455
ENSG00000218739	CEBPZOS	0.573247	0.037665
ENSG00000111602	TIMELESS	-0.681583	0.0377157
ENSG00000178952	TUFM	0.44989	0.0377584
ENSG00000197714	ZNF460	-0.849009	0.0377584
ENSG00000131495	NDUFA2	0.928691	0.0378815
ENSG00000135074	ADAM19	0.557263	0.0379097
ENSG00000138376	BARD1	-0.730279	0.0380005
ENSG00000066933	MYO9A	-0.68613	0.0381683
ENSG00000137275	RIPK1	-0.531515	0.0381683
ENSG00000171444	MCC	-0.738323	0.0383045
ENSG00000172197	MBOAT1	-0.770067	0.0383045
ENSG00000125821	DTD1	0.476599	0.0383137
ENSG00000163704	PRRT3	1.01112	0.0384519
ENSG00000164609	SLU7	0.367581	0.0384634
ENSG00000170190	SLC16A5	0.581693	0.0384634
ENSG00000108588	CCDC47	-0.494645	0.0385005
ENSG00000135917	SLC19A3	-1.24875	0.0385094
ENSG00000139645	ANKRD52	-0.612152	0.0385658
ENSG00000121966	CXCR4	0.802428	0.0386952
ENSG00000156650	KAT6B	-0.608043	0.0387634
ENSG00000186298	PPP1CC	-0.427055	0.0387929
ENSG00000017483	SLC38A5	-1.09098	0.0389068
ENSG00000140632	GLYR1	-0.55298	0.0390261
ENSG00000134330	IAH1	0.849317	0.0390263
ENSG00000135763	URB2	-0.694796	0.0390263
ENSG00000171109	MFN1	-0.411683	0.0390263
ENSG00000196683	TOMM7	0.660161	0.0390263
ENSG00000197561	ELANE	-1.23778	0.0390263
ENSG00000213676	ATF6B	0.409954	0.0390263
ENSG00000083457	ITGAE	1.01518	0.0390281
ENSG00000180011	ZADH2	-0.370088	0.0390609
ENSG00000189043	NDUFA4	1.05359	0.0391444
ENSG00000164654	MIOS	-0.37481	0.0392953
ENSG00000176641	RNF152	-0.886798	0.0392953
ENSG00000142675	CNKSR1	0.856591	0.0394085
ENSG00000154188	ANGPT1	-0.848561	0.0394248
ENSG00000151164	RAD9B	-1.17343	0.0394381
ENSG00000168438	CDC40	-0.525622	0.0394536
ENSG00000114646	CSPG5	1.23444	0.0394711
ENSG00000084676	NCOA1	-0.621301	0.0395202
ENSG00000066827	ZFAT	-0.610162	0.0395293
ENSG00000163050	COQ8A	-0.681218	0.0395293
ENSG00000143443	C1orf56	0.56121	0.0395784
ENSG00000113924	HGD	1.19879	0.0396582
ENSG00000160796	NBEAL2	-0.489738	0.0398284
ENSG00000170471	RALGAPB	-0.512177	0.0398415
ENSG00000198796	ALPK2	-0.705114	0.0398685
ENSG00000213719	CLIC1	0.646398	0.0398685
ENSG00000113645	WWC1	-1.24065	0.0400145
ENSG00000054983	GALC	-0.466591	0.0401517
ENSG00000102226	USP11	0.555839	0.0401517
ENSG00000186310	NAP1L3	0.8529	0.0401517
ENSG00000234912	SNHG20	1.00618	0.0401517
ENSG00000223855	HRAT92	0.896625	0.0404059
ENSG00000127124	HIVEP3	-0.563831	0.0405055
ENSG00000140416	TPM1	0.486572	0.0405055
ENSG00000107036	RIC1	-0.54139	0.0405583
ENSG00000166681	BEX3	0.374956	0.0405583
ENSG00000198740	ZNF652	-0.61705	0.0405583
ENSG00000148484	RSU1	-0.355549	0.0407002
ENSG00000236751	LINC01186	1.0446	0.0407051
ENSG00000112343	TRIM38	-0.602057	0.0408312
ENSG00000125148	MT2A	0.615228	0.0408917
ENSG00000161381	PLXDC1	0.615386	0.0408917
ENSG00000123297	TSFM	0.489862	0.0410471
ENSG00000164330	EBF1	-0.800083	0.0410471
ENSG00000253797	UTP14C	-0.40595	0.0410632
ENSG00000163040	CCDC74A	1.07344	0.0411138
ENSG00000151014	NOCT	-0.847741	0.0411831
ENSG00000131174	COX7B	1.04409	0.0411979
ENSG00000143819	EPHX1	-0.667822	0.0413426
ENSG00000144426	NBEAL1	-0.769841	0.0413426
ENSG00000206418	RAB12	0.46229	0.041367
ENSG00000095906	NUBP2	0.703745	0.0413757
ENSG00000103429	BFAR	0.525	0.0413757
ENSG00000145819	ARHGAP26	-0.584491	0.0413757
ENSG00000157349	DDX19B	0.492856	0.0413908
ENSG00000165810	BTNL9	-0.658728	0.0414034
ENSG00000198837	DENND4B	-0.404243	0.0414436
ENSG00000093072	ADA2	0.653456	0.0414503
ENSG00000149476	TKFC	0.630148	0.0414757
ENSG00000177410	ZFAS1	1.08383	0.0414757
ENSG00000186326	RGS9BP	-1.0623	0.0414836
ENSG00000101236	RNF24	-0.775758	0.0414912
ENSG00000099817	POLR2E	0.494063	0.041492
ENSG00000167114	SLC27A4	-0.519886	0.041492
ENSG00000109654	TRIM2	-0.532529	0.0416234
ENSG00000120327	PCDHB14	-0.878	0.0416234
ENSG00000012174	MBTPS2	-0.423526	0.0416384
ENSG00000115705	TPO	-0.852194	0.0416384
ENSG00000177125	ZBTB34	-0.733937	0.0417712
ENSG00000232859	LYRM9	0.716533	0.0417712
ENSG00000256340	ABCC6P1	1.20913	0.0417712
ENSG00000027869	SH2D2A	-1.20974	0.0418426
ENSG00000178662	CSRNP3	-0.608622	0.0418426
ENSG00000119408	NEK6	-0.745103	0.0418646
ENSG00000182257	PRR34	1.04801	0.041897
ENSG00000090661	CERS4	0.697687	0.0423732
ENSG00000101310	SEC23B	-0.532637	0.0423732
ENSG00000176974	SHMT1	-0.672168	0.0423732
ENSG00000101974	ATP11C	-0.855739	0.0424605
ENSG00000158526	TSR2	0.437011	0.0424605
ENSG00000179818	PCBP1-AS1	0.603696	0.0424605
ENSG00000253837	LOC100507156	-1.23182	0.0424605
ENSG00000135373	EHF	-1.2275	0.0425923
ENSG00000272325	NUDT3	-0.531416	0.0426361
ENSG00000163947	ARHGEF3	-0.390663	0.0426775
ENSG00000189180	ZNF33A	-0.472059	0.0429636
ENSG00000093000	NUP50	-0.488164	0.0430061
ENSG00000137288	UQCC2	1.03185	0.0430061
ENSG00000144406	UNC80	1.23187	0.0430061
ENSG00000171747	LGALS4	-1.23153	0.0430061
ENSG00000176386	CDC26	0.796056	0.0431716
ENSG00000140992	PDPK1	-0.554533	0.0434017
ENSG00000223547	ZNF844	0.475337	0.0434327
ENSG00000070495	JMJD6	-0.51008	0.0434825
ENSG00000143333	RGS16	-0.927308	0.0435328
ENSG00000133142	TCEAL4	0.339991	0.0435971
ENSG00000072609	CHFR	0.454424	0.0437291
ENSG00000095015	MAP3K1	-0.741954	0.0437291
ENSG00000112062	MAPK14	-0.395555	0.0437291
ENSG00000148655	LRMDA	-0.719258	0.0437291
ENSG00000158966	CACHD1	-0.869386	0.0437291
ENSG00000138641	HERC3	-0.385012	0.0437385
ENSG00000255823	MTRNR2L8	-1.22801	0.0438076
ENSG00000033327	GAB2	0.5559	0.043911
ENSG00000160213	CSTB	0.482447	0.0439993
ENSG00000224597	SVIL-AS1	-0.488549	0.0442504
ENSG00000271826	PLS3-AS1	1.16003	0.0443557
ENSG00000254004	ZNF260	-0.442342	0.0444741
ENSG00000196275	GTF2IRD2	0.887373	0.0445875
ENSG00000080345	RIF1	-0.727221	0.0447263
ENSG00000206535	LNP1	0.594237	0.0447711
ENSG00000047056	WDR37	-0.559842	0.0448209
ENSG00000154059	IMPACT	0.426657	0.0448209
ENSG00000169032	MAP2K1	-0.625647	0.0448209
ENSG00000004777	ARHGAP33	0.780565	0.0448607
ENSG00000164815	ORC5	0.744311	0.0448718
ENSG00000118855	MFSD1	-0.465079	0.0449308
ENSG00000110852	CLEC2B	0.987318	0.0449401
ENSG00000132938	MTUS2	-0.544478	0.0449401
ENSG00000138606	SHF	0.575102	0.0450594
ENSG00000219626	FAM228B	0.666115	0.0450646
ENSG00000102302	FGD1	0.54857	0.0451268
ENSG00000137968	SLC44A5	1.21253	0.0451809
ENSG00000136100	VPS36	-0.372029	0.0452105
ENSG00000164506	STXBP5	-0.600107	0.0452105
ENSG00000138767	CNOT6L	-0.547743	0.0452108
ENSG00000177463	NR2C2	-0.771524	0.0452108
ENSG00000188389	PDCD1	-1.18287	0.0452108
ENSG00000244682	FCGR2C	-1.06407	0.0452468
ENSG00000138621	PPCDC	0.611487	0.0452629
ENSG00000169224	GCSAML	-1.14646	0.0452629
ENSG00000179933	C14orf119	0.69024	0.0453444
ENSG00000253731	PCDHGA6	-1.08783	0.0453444
ENSG00000188677	PARVB	-0.455144	0.0453631
ENSG00000140199	SLC12A6	-0.703996	0.0453767
ENSG00000154917	RAB6B	-0.530211	0.045389
ENSG00000101546	RBFA	0.571108	0.0454618
ENSG00000234390	USP27X-AS1	-0.962449	0.0454618
ENSG00000092148	HECTD1	-0.588786	0.0455036
ENSG00000133104	SPART	-0.343689	0.0455299
ENSG00000272288	LOC101929243	0.921495	0.0455897
ENSG00000150275	PCDH15	1.19719	0.0456049
ENSG00000154265	ABCA5	-0.512851	0.0456049
ENSG00000165392	WRN	-0.61996	0.0456052
ENSG00000183864	TOB2	-0.650637	0.0456127
ENSG00000067057	PFKP	0.563469	0.0456523
ENSG00000078804	TP53INP2	0.532983	0.0456523
ENSG00000134594	RAB33A	1.14801	0.0456523
ENSG00000108010	GLRX3	0.686119	0.045726
ENSG00000149806	FAU	0.903312	0.0457887
ENSG00000079215	SLC1A3	-0.504393	0.045808
ENSG00000229809	ZNF688	0.674272	0.0460153
ENSG00000151445	VIPAS39	0.386568	0.0460247
ENSG00000138311	ZNF365	1.08611	0.0461549
ENSG00000205791	LOH12CR2	1.00195	0.0461549
ENSG00000185122	HSF1	0.593986	0.046166
ENSG00000229043	LOC101927021	0.812094	0.046166
ENSG00000265148	TSPOAP1-AS1	1.17698	0.0461704
ENSG00000095261	PSMD5	-0.395456	0.046233
ENSG00000124257	NEURL2	0.67313	0.046233
ENSG00000127824	TUBA4A	0.594404	0.046233
ENSG00000133773	CCDC59	0.783994	0.046233
ENSG00000228439	TSTD3	0.878727	0.046233
ENSG00000131080	EDA2R	1.0255	0.046261
ENSG00000102452	NALCN	-0.894136	0.0463612
ENSG00000129562	DAD1	0.568799	0.0463612
ENSG00000213339	QTRT1	0.487609	0.0463612
ENSG00000111666	CHPT1	-0.463275	0.0463883
ENSG00000060237	WNK1	-0.567249	0.0464202
ENSG00000046653	GPM6B	-0.692775	0.0464282
ENSG00000116688	MFN2	0.459259	0.0464762
ENSG00000247081	BAALC-AS1	-1.08991	0.0464762
ENSG00000138768	USO1	-0.393631	0.046605
ENSG00000163428	LRRC58	-0.613328	0.046605
ENSG00000082482	KCNK2	-1.20771	0.0466362
ENSG00000101336	HCK	-0.888564	0.0466362
ENSG00000130881	LRP3	0.510906	0.0466362
ENSG00000169851	PCDH7	-0.743606	0.0466362
ENSG00000237463	LRRC52-AS1	1.17473	0.0466362
ENSG00000178531	CTXN1	1.19917	0.0467386
ENSG00000183401	CCDC159	0.559382	0.0467592
ENSG00000103363	ELOB	0.830817	0.046775
ENSG00000136819	C9orf78	0.351915	0.0467847
ENSG00000230667	SETSIP	-1.19156	0.0468219
ENSG00000121039	RDH10	-0.534368	0.0468693
ENSG00000177465	ACOT4	0.93971	0.0468693
ENSG00000100147	CCDC134	-0.972701	0.0468833
ENSG00000133315	MACROD1	0.508236	0.0469011
ENSG00000166848	TERF2IP	0.284942	0.0469111
ENSG00000157036	EXOG	0.659181	0.046913
ENSG00000155660	PDIA4	-0.614654	0.0470014
ENSG00000205309	NT5M	0.644826	0.0470593
ENSG00000102924	CBLN1	1.00955	0.047067
ENSG00000157827	FMNL2	-0.647844	0.047102
ENSG00000152443	ZNF776	-0.470083	0.0471205
ENSG00000231013	LOC107105282	1.04468	0.0471308
ENSG00000135924	DNAJB2	0.462327	0.0472164
ENSG00000061676	NCKAP1	-0.530855	0.047233
ENSG00000072682	P4HA2	-0.46785	0.047233
ENSG00000161958	FGF11	-1.2063	0.0472555
ENSG00000116954	RRAGC	0.465516	0.0473092
ENSG00000180509	KCNE1	0.664977	0.0473191
ENSG00000167515	TRAPPC2L	0.830827	0.0473691
ENSG00000180660	MAB21L1	1.10492	0.0473691
ENSG00000134516	DOCK2	-0.829089	0.0474406
ENSG00000137720	C11orf1	0.755735	0.0474481
ENSG00000172985	SH3RF3	0.550168	0.0475853
ENSG00000092929	UNC13D	0.840487	0.0477252
ENSG00000100599	RIN3	0.502269	0.0477295
ENSG00000168291	PDHB	0.381375	0.0477295
ENSG00000180198	RCC1	-0.666575	0.0477295
ENSG00000197951	ZNF71	-0.430557	0.0477295
ENSG00000180370	PAK2	-0.397607	0.047761
ENSG00000140939	NOL3	0.538058	0.0479516
[truncated: 36 more rows]

## Sheet: Supplementary Table 3B
Category	ID	Name	Source	p-value	q-value Bonferroni	q-value FDR B&H	q-value FDR B&Y	Hit Count in Query List	Hit Count in Genome	Hit in Query List
GO: Molecular Function	GO:0009055	electron transfer activity		3.023e-06	0.004057	0.004057	0.03156	18	123	GLRX3,AKR7A2,UQCRQ,ALDH4A1,NDUFA4,GLRX,UQCR11,HAAO,COX7A2L,DHRS3,UQCR10,COX5B,COX6C,COX7A1,COX7A2,COX7B,COX8A,DLD
GO: Molecular Function	GO:0004129	cytochrome-c oxidase activity		5.719e-05	0.07675	0.01918	0.1492	8	34	NDUFA4,COX7A2L,COX5B,COX6C,COX7A1,COX7A2,COX7B,COX8A
GO: Molecular Function	GO:0015002	heme-copper terminal oxidase activity		5.719e-05	0.07675	0.01918	0.1492	8	34	NDUFA4,COX7A2L,COX5B,COX6C,COX7A1,COX7A2,COX7B,COX8A
GO: Molecular Function	GO:0016676	oxidoreductase activity, acting on a heme group of donors, oxygen as acceptor		5.719e-05	0.07675	0.01918	0.1492	8	34	NDUFA4,COX7A2L,COX5B,COX6C,COX7A1,COX7A2,COX7B,COX8A
GO: Molecular Function	GO:0016675	oxidoreductase activity, acting on a heme group of donors		7.147e-05	0.09591	0.01918	0.1492	8	35	NDUFA4,COX7A2L,COX5B,COX6C,COX7A1,COX7A2,COX7B,COX8A
GO: Biological Process	GO:0006119	oxidative phosphorylation		1.506e-09	9.64e-06	4.87e-06	4.549e-05	25	153	DNAJC30,UQCC2,ATP5MG,UQCRQ,SNCA,ATP5ME,ATP5PO,NDUFA2,NDUFA4,NDUFA9,NDUFA10,NDUFB1,UQCR11,ISCU,COX7A2L,UQCR10,SLC25A23,COX5B,COX6C,COX7A1,COX7A2,COX7B,COX8A,NDUFA11,DLD
GO: Biological Process	GO:0015985	energy coupled proton transport, down electrochemical gradient		2.283e-09	1.461e-05	4.87e-06	4.549e-05	25	156	DNAJC30,UQCC2,ATP5MG,UQCRQ,SNCA,ATP5ME,ATP5PO,NDUFA2,NDUFA4,NDUFA9,NDUFA10,NDUFB1,UQCR11,ISCU,COX7A2L,UQCR10,SLC25A23,COX5B,COX6C,COX7A1,COX7A2,COX7B,COX8A,NDUFA11,DLD
GO: Biological Process	GO:0015986	ATP synthesis coupled proton transport		2.283e-09	1.461e-05	4.87e-06	4.549e-05	25	156	DNAJC30,UQCC2,ATP5MG,UQCRQ,SNCA,ATP5ME,ATP5PO,NDUFA2,NDUFA4,NDUFA9,NDUFA10,NDUFB1,UQCR11,ISCU,COX7A2L,UQCR10,SLC25A23,COX5B,COX6C,COX7A1,COX7A2,COX7B,COX8A,NDUFA11,DLD
GO: Biological Process	GO:0009206	purine ribonucleoside triphosphate biosynthetic process		4.506e-08	0.0002884	4.806e-05	0.000449	26	193	DNAJC30,UQCC2,ATP5MG,UQCRQ,SNCA,ATP5ME,ATP5PO,NDUFA2,NDUFA4,NDUFA9,NDUFA10,NDUFB1,NME1,UQCR11,ISCU,COX7A2L,UQCR10,SLC25A23,COX5B,COX6C,COX7A1,COX7A2,COX7B,COX8A,NDUFA11,DLD
GO: Biological Process	GO:0006754	ATP biosynthetic process		4.956e-08	0.0003172	4.806e-05	0.000449	25	181	DNAJC30,UQCC2,ATP5MG,UQCRQ,SNCA,ATP5ME,ATP5PO,NDUFA2,NDUFA4,NDUFA9,NDUFA10,NDUFB1,UQCR11,ISCU,COX7A2L,UQCR10,SLC25A23,COX5B,COX6C,COX7A1,COX7A2,COX7B,COX8A,NDUFA11,DLD
GO: Biological Process	GO:0009145	purine nucleoside triphosphate biosynthetic process		5.013e-08	0.0003208	4.806e-05	0.000449	26	194	DNAJC30,UQCC2,ATP5MG,UQCRQ,SNCA,ATP5ME,ATP5PO,NDUFA2,NDUFA4,NDUFA9,NDUFA10,NDUFB1,NME1,UQCR11,ISCU,COX7A2L,UQCR10,SLC25A23,COX5B,COX6C,COX7A1,COX7A2,COX7B,COX8A,NDUFA11,DLD
GO: Biological Process	GO:0003012	muscle system process		5.257e-08	0.0003364	4.806e-05	0.000449	48	523	ACTA1,ACTN2,F2R,MYL9,SCN2B,GTF2IRD2,SORBS2,PI16,SGCA,GLRX3,KLF15,INPP5F,LMOD2,MYL12A,MYL2,MYL5,GATM,C12orf57,MSTN,STRIT1,ABCC8,NPPA,NOL3,CAMK2B,SPX,P2RX1,P2RX6,TNNI3,TNNT1,TPM1,TPM3,MYL7,MYOZ1,MYL6B,VEGFB,CRYAB,HSPB6,PRKACA,CCN2,TRPM4,DAPK3,DES,KCNE1,CXCR4,EDN3,EDNRA,ACE2,PLCE1
GO: Biological Process	GO:0009142	nucleoside triphosphate biosynthetic process		6.698e-08	0.0004287	5.359e-05	0.0005006	27	210	DNAJC30,UQCC2,ATP5MG,UQCRQ,SNCA,ATP5ME,ATP5PO,NDUFA2,NDUFA4,NDUFA9,NDUFA10,NDUFB1,NME1,UQCR11,ISCU,COX7A2L,UQCR10,SLC25A23,COX5B,COX6C,COX7A1,COX7A2,COX7B,COX8A,NDUFA11,AK5,DLD
GO: Biological Process	GO:0009201	ribonucleoside triphosphate biosynthetic process		8.441e-08	0.0005403	6.003e-05	0.0005607	26	199	DNAJC30,UQCC2,ATP5MG,UQCRQ,SNCA,ATP5ME,ATP5PO,NDUFA2,NDUFA4,NDUFA9,NDUFA10,NDUFB1,NME1,UQCR11,ISCU,COX7A2L,UQCR10,SLC25A23,COX5B,COX6C,COX7A1,COX7A2,COX7B,COX8A,NDUFA11,DLD
GO: Biological Process	GO:0009152	purine ribonucleotide biosynthetic process		1.646e-07	0.001053	9.874e-05	0.0009223	34	320	DCAKD,DNAJC30,UQCC2,ATP5MG,MPC1,UQCRQ,SNCA,ATP5ME,ATP5PO,NDUFA2,NDUFA4,NDUFA9,NDUFA10,NDUFB1,NME1,UQCR11,NPPA,ISCU,COX7A2L,PDHB,PPCDC,UQCR10,SLC25A23,COX5B,COX6C,COX7A1,COX7A2,COX7B,COX8A,NDUFA11,AK5,DLD,HSD17B8,PPCS
GO: Biological Process	GO:0009205	purine ribonucleoside triphosphate metabolic process		1.697e-07	0.001086	9.874e-05	0.0009223	26	206	DNAJC30,UQCC2,ATP5MG,UQCRQ,SNCA,ATP5ME,ATP5PO,NDUFA2,NDUFA4,NDUFA9,NDUFA10,NDUFB1,NME1,UQCR11,ISCU,COX7A2L,UQCR10,SLC25A23,COX5B,COX6C,COX7A1,COX7A2,COX7B,COX8A,NDUFA11,DLD
GO: Biological Process	GO:0072522	purine-containing compound biosynthetic process		2.033e-07	0.001301	0.0001084	0.001013	35	338	DCAKD,DNAJC30,UQCC2,ATP5MG,MPC1,UQCRQ,SNCA,ATP5ME,ATP5PO,NDUFA2,NDUFA4,NDUFA9,NDUFA10,NDUFB1,ADA2,NME1,UQCR11,NPPA,ISCU,COX7A2L,PDHB,PPCDC,UQCR10,SLC25A23,COX5B,COX6C,COX7A1,COX7A2,COX7B,COX8A,NDUFA11,AK5,DLD,HSD17B8,PPCS
GO: Biological Process	GO:0006164	purine nucleotide biosynthetic process		2.56e-07	0.001638	0.000126	0.001177	34	326	DCAKD,DNAJC30,UQCC2,ATP5MG,MPC1,UQCRQ,SNCA,ATP5ME,ATP5PO,NDUFA2,NDUFA4,NDUFA9,NDUFA10,NDUFB1,NME1,UQCR11,NPPA,ISCU,COX7A2L,PDHB,PPCDC,UQCR10,SLC25A23,COX5B,COX6C,COX7A1,COX7A2,COX7B,COX8A,NDUFA11,AK5,DLD,HSD17B8,PPCS
GO: Biological Process	GO:0009199	ribonucleoside triphosphate metabolic process		3.297e-07	0.00211	0.0001462	0.001366	26	213	DNAJC30,UQCC2,ATP5MG,UQCRQ,SNCA,ATP5ME,ATP5PO,NDUFA2,NDUFA4,NDUFA9,NDUFA10,NDUFB1,NME1,UQCR11,ISCU,COX7A2L,UQCR10,SLC25A23,COX5B,COX6C,COX7A1,COX7A2,COX7B,COX8A,NDUFA11,DLD
GO: Biological Process	GO:0042775	mitochondrial ATP synthesis coupled electron transport		3.488e-07	0.002232	0.0001462	0.001366	17	100	UQCRQ,SNCA,NDUFA2,NDUFA4,NDUFA9,NDUFA10,NDUFB1,UQCR11,ISCU,COX7A2L,UQCR10,COX5B,COX6C,COX7B,COX8A,NDUFA11,DLD
GO: Biological Process	GO:0042773	ATP synthesis coupled electron transport		4.042e-07	0.002587	0.0001462	0.001366	17	101	UQCRQ,SNCA,NDUFA2,NDUFA4,NDUFA9,NDUFA10,NDUFB1,UQCR11,ISCU,COX7A2L,UQCR10,COX5B,COX6C,COX7B,COX8A,NDUFA11,DLD
GO: Biological Process	GO:0009260	ribonucleotide biosynthetic process		4.217e-07	0.002699	0.0001462	0.001366	34	333	DCAKD,DNAJC30,UQCC2,ATP5MG,MPC1,UQCRQ,SNCA,ATP5ME,ATP5PO,NDUFA2,NDUFA4,NDUFA9,NDUFA10,NDUFB1,NME1,UQCR11,NPPA,ISCU,COX7A2L,PDHB,PPCDC,UQCR10,SLC25A23,COX5B,COX6C,COX7A1,COX7A2,COX7B,COX8A,NDUFA11,AK5,DLD,HSD17B8,PPCS
GO: Biological Process	GO:0022900	electron transport chain		4.254e-07	0.002723	0.0001462	0.001366	25	202	GLRX3,AKR7A2,UQCRQ,ALDH4A1,SNCA,NDUFA2,NDUFA4,NDUFA9,NDUFA10,NDUFB1,GLRX,UQCR11,ISCU,HAAO,COX7A2L,DHRS3,UQCR10,COX5B,COX6C,COX7A1,COX7A2,COX7B,COX8A,NDUFA11,DLD
GO: Biological Process	GO:0009144	purine nucleoside triphosphate metabolic process		4.34e-07	0.002778	0.0001462	0.001366	26	216	DNAJC30,UQCC2,ATP5MG,UQCRQ,SNCA,ATP5ME,ATP5PO,NDUFA2,NDUFA4,NDUFA9,NDUFA10,NDUFB1,NME1,UQCR11,ISCU,COX7A2L,UQCR10,SLC25A23,COX5B,COX6C,COX7A1,COX7A2,COX7B,COX8A,NDUFA11,DLD
GO: Biological Process	GO:1901137	carbohydrate derivative biosynthetic process		4.803e-07	0.003074	0.0001537	0.001436	63	829	DCAKD,B3GNT5,TNIP1,EXT1,EXTL1,NUDT14,FMOD,PHLDA1,DNAJC30,UQCC2,ATP5MG,CSPG5,NECAB3,MPC1,UQCRQ,ST6GALNAC4,TRAK2,SNCA,ATP5ME,B4GALNT1,ATP5PO,BCL2,NDUFA2,NDUFA4,NDUFA9,NDUFA10,NDUFB1,ADA2,DPM1,BGN,NME1,UQCR11,NPPA,B3GNT9,OMD,ISCU,COX7A2L,MGAT4B,PDHB,PPCDC,CYTL1,UQCR10,DERL3,SDF2L1,SLC25A23,VEGFB,COX5B,COX6C,COX7A1,COX7A2,COX7B,COX8A,NDUFA11,DAD1,GALNT18,AK5,DLD,MPPE1,HSD17B8,RENBP,PPCS,ST8SIA2,LUM
GO: Biological Process	GO:0046390	ribose phosphate biosynthetic process		6.383e-07	0.004085	0.0001945	0.001817	34	339	DCAKD,DNAJC30,UQCC2,ATP5MG,MPC1,UQCRQ,SNCA,ATP5ME,ATP5PO,NDUFA2,NDUFA4,NDUFA9,NDUFA10,NDUFB1,NME1,UQCR11,NPPA,ISCU,COX7A2L,PDHB,PPCDC,UQCR10,SLC25A23,COX5B,COX6C,COX7A1,COX7A2,COX7B,COX8A,NDUFA11,AK5,DLD,HSD17B8,PPCS
GO: Biological Process	GO:0009141	nucleoside triphosphate metabolic process		1.095e-06	0.007009	0.0003186	0.002976	27	241	DNAJC30,UQCC2,ATP5MG,UQCRQ,SNCA,ATP5ME,ATP5PO,NDUFA2,NDUFA4,NDUFA9,NDUFA10,NDUFB1,NME1,UQCR11,ISCU,COX7A2L,UQCR10,SLC25A23,COX5B,COX6C,COX7A1,COX7A2,COX7B,COX8A,NDUFA11,AK5,DLD
GO: Biological Process	GO:0006936	muscle contraction		1.916e-06	0.01226	0.0005124	0.004786	36	388	ACTA1,ACTN2,F2R,MYL9,SCN2B,SGCA,LMOD2,MYL12A,MYL2,MYL5,C12orf57,STRIT1,NPPA,SPX,P2RX1,P2RX6,TNNI3,TNNT1,TPM1,TPM3,MYL7,MYL6B,VEGFB,CRYAB,HSPB6,PRKACA,CCN2,TRPM4,DAPK3,DES,KCNE1,CXCR4,EDN3,EDNRA,ACE2,PLCE1
GO: Biological Process	GO:1902600	proton transmembrane transport		1.921e-06	0.0123	0.0005124	0.004786	29	278	DNAJC30,UQCC2,ATP5MG,UQCRQ,SNCA,ATP1A4,ATP5ME,ATP6V1G2,ATP5PO,NDUFA2,NDUFA4,NDUFA9,NDUFA10,NDUFB1,UQCR11,ISCU,COX7A2L,UQCR10,UCP2,SLC25A23,COX5B,COX6C,COX7A1,COX7A2,COX7B,COX8A,NDUFA11,DLD,TMCO3
GO: Biological Process	GO:0009165	nucleotide biosynthetic process		2.179e-06	0.01395	0.0005579	0.005212	38	423	DCAKD,AFMID,DNAJC30,UQCC2,ATP5MG,MPC1,UQCRQ,SNCA,ATP5ME,ATP5PO,NDUFA2,NDUFA4,NMRK2,NDUFA9,NDUFA10,NDUFB1,NME1,UQCR11,NPPA,ISCU,HAAO,COX7A2L,PDHB,PPCDC,UQCR10,SLC25A23,COX5B,COX6C,COX7A1,COX7A2,COX7B,COX8A,NMNAT3,NDUFA11,AK5,DLD,HSD17B8,PPCS
GO: Biological Process	GO:0072521	purine-containing compound metabolic process		2.422e-06	0.0155	0.0005961	0.005569	49	614	DCAKD,ACOT4,OARD1,DNAJC30,MACROD1,UQCC2,DNPH1,ATP5MG,NT5C2,OGDHL,MPC1,UQCRQ,SNCA,ATP5ME,ATP5PO,NDUFA2,NDUFA4,NDUFA9,NDUFA10,NDUFB1,ADA2,SULT1A1,ACOT2,NME1,UQCR11,NPPA,ISCU,COX7A2L,NUP188,PDHB,PPCDC,HMGCL,PFKP,UQCR10,SLC25A23,NUDT7,COX5B,COX6C,COX7A1,COX7A2,COX7B,COX8A,NDUFA11,TKFC,AK5,DLD,HSD17B8,SLC16A9,PPCS
GO: Biological Process	GO:1901293	nucleoside phosphate biosynthetic process		2.58e-06	0.01651	0.0006115	0.005712	38	426	DCAKD,AFMID,DNAJC30,UQCC2,ATP5MG,MPC1,UQCRQ,SNCA,ATP5ME,ATP5PO,NDUFA2,NDUFA4,NMRK2,NDUFA9,NDUFA10,NDUFB1,NME1,UQCR11,NPPA,ISCU,HAAO,COX7A2L,PDHB,PPCDC,UQCR10,SLC25A23,COX5B,COX6C,COX7A1,COX7A2,COX7B,COX8A,NMNAT3,NDUFA11,AK5,DLD,HSD17B8,PPCS
GO: Biological Process	GO:0045333	cellular respiration		2.777e-06	0.01777	0.0006347	0.005929	24	209	OGDHL,UQCRQ,SNCA,NDUFA2,NDUFA4,NDUFA9,NDUFA10,NDUFB1,UQCR11,OXA1L,ISCU,COX7A2L,PDHB,UQCR10,SLC25A23,COX5B,COX6C,COX7B,COX8A,NDUFA11,PRKACA,DLD,TRAP1,SDHAF4
GO: Biological Process	GO:0017144	drug metabolic process		5.367e-06	0.03435	0.001184	0.01106	56	760	ALDH3B1,CARNS1,DNAJC30,UQCC2,AKR7A2,ATP5MG,CSPG5,NT5C2,UQCRQ,SNCA,ATP5ME,ATP5PO,GATM,NDUFA2,NDUFA4,NDUFA9,NDUFA10,NDUFB1,ADA2,BGN,SULT1A1,UQCR11,TGFB2,ISCU,HAAO,COX7A2L,HBA1,HBA2,HBB,PCBD1,PCCB,HGD,SDSL,DDAH2,DDAH1,HMGCL,UQCR10,TYRP1,CLU,FADS2,PYCR2,SLC25A23,COX5B,COX6C,COX7A1,COX7A2,COX7B,COX8A,PNKD,NDUFA11,CYP2J2,CYP11A1,JAK2,DLD,RENBP,APIP
GO: Biological Process	GO:0033108	mitochondrial respiratory chain complex assembly		5.742e-06	0.03675	0.001198	0.01119	15	97	COA5,SCO1,UQCC2,TMEM126B,NDUFA2,NDUFA9,NDUFA10,NDUFB1,DMAC1,OXA1L,COX14,UQCR10,NDUFAF3,NDUFA11,SDHAF4
GO: Biological Process	GO:0006091	generation of precursor metabolites and energy		5.801e-06	0.03713	0.001198	0.01119	46	580	GLRX3,DNAJC30,UQCC2,AKR7A2,ATP5MG,ASIP,OGDHL,UQCRQ,ALDH4A1,SNCA,ATP5ME,ATP5PO,NDUFA2,NDUFA4,NDUFA9,NDUFA10,NDUFB1,PER2,GLRX,UQCR11,OXA1L,GYS1,ISCU,HAAO,COX7A2L,NUP188,DHRS3,PDHB,HMGCL,PFKP,UQCR10,TYRP1,SLC25A23,COX5B,COX6C,COX7A1,COX7A2,COX7B,COX8A,NDUFA11,TKFC,PRKACA,DLD,ATP5IF1,TRAP1,SDHAF4
GO: Biological Process	GO:0046034	ATP metabolic process		7.184e-06	0.04598	0.001437	0.01342	31	329	DNAJC30,UQCC2,ATP5MG,OGDHL,UQCRQ,SNCA,ATP5ME,ATP5PO,NDUFA2,NDUFA4,NDUFA9,NDUFA10,NDUFB1,UQCR11,ISCU,COX7A2L,NUP188,PFKP,UQCR10,SLC25A23,COX5B,COX6C,COX7A1,COX7A2,COX7B,COX8A,NDUFA11,TKFC,AK5,DLD,ATP5IF1
GO: Biological Process	GO:0055086	nucleobase-containing small molecule metabolic process		7.967e-06	0.05099	0.001545	0.01443	57	789	DCAKD,ACOT4,AFMID,OARD1,NUDT14,DNAJC30,MACROD1,UQCC2,DNPH1,ATP5MG,NT5C2,OGDHL,MPC1,UQCRQ,SNCA,ATP5ME,ATP5PO,NDUFA2,NDUFA4,NMRK2,NDUFA9,NDUFA10,NDUFB1,ADA2,DPM1,SULT1A1,GLRX,ACOT2,NME1,UQCR11,NPPA,ISCU,HAAO,COX7A2L,NUP188,PDHB,PPCDC,HMGCL,PFKP,UQCR10,SLC25A23,NUDT7,COX5B,COX6C,COX7A1,COX7A2,COX7B,COX8A,NMNAT3,NDUFA11,TKFC,NT5M,AK5,DLD,HSD17B8,RENBP,PPCS
GO: Biological Process	GO:0022904	respiratory electron transport chain		8.353e-06	0.05346	0.001572	0.01469	17	125	UQCRQ,SNCA,NDUFA2,NDUFA4,NDUFA9,NDUFA10,NDUFB1,UQCR11,ISCU,COX7A2L,UQCR10,COX5B,COX6C,COX7B,COX8A,NDUFA11,DLD
GO: Biological Process	GO:0097250	mitochondrial respirasome assembly		1.16e-05	0.07427	0.002122	0.01982	4	5	COX7A2L,COX7A1,COX7A2,HIGD2A
GO: Biological Process	GO:0009150	purine ribonucleotide metabolic process		1.22e-05	0.07807	0.002169	0.02026	44	561	DCAKD,ACOT4,DNAJC30,UQCC2,ATP5MG,NT5C2,OGDHL,MPC1,UQCRQ,SNCA,ATP5ME,ATP5PO,NDUFA2,NDUFA4,NDUFA9,NDUFA10,NDUFB1,SULT1A1,ACOT2,NME1,UQCR11,NPPA,ISCU,COX7A2L,NUP188,PDHB,PPCDC,HMGCL,PFKP,UQCR10,SLC25A23,NUDT7,COX5B,COX6C,COX7A1,COX7A2,COX7B,COX8A,NDUFA11,TKFC,AK5,DLD,HSD17B8,PPCS
GO: Biological Process	GO:0006163	purine nucleotide metabolic process		1.278e-05	0.08177	0.00221	0.02064	45	580	DCAKD,ACOT4,DNAJC30,UQCC2,DNPH1,ATP5MG,NT5C2,OGDHL,MPC1,UQCRQ,SNCA,ATP5ME,ATP5PO,NDUFA2,NDUFA4,NDUFA9,NDUFA10,NDUFB1,SULT1A1,ACOT2,NME1,UQCR11,NPPA,ISCU,COX7A2L,NUP188,PDHB,PPCDC,HMGCL,PFKP,UQCR10,SLC25A23,NUDT7,COX5B,COX6C,COX7A1,COX7A2,COX7B,COX8A,NDUFA11,TKFC,AK5,DLD,HSD17B8,PPCS
GO: Biological Process	GO:0007005	mitochondrion organization		1.518e-05	0.09716	0.002557	0.02388	44	566	COA5,SCO1,SLC25A5,SLC25A6,UQCC2,CHCHD6,ATP5MG,TRAK2,SNCA,IFI6,ATP5ME,ATP5PO,TMEM126B,BCL2,NDUFA2,NDUFA9,NDUFA10,NDUFB1,MOAP1,SQSTM1,MLLT11,DMAC1,NOL3,OXA1L,COX7A2L,COX14,GABARAPL2,HMGCL,UQCR10,CLU,TOMM7,NDUFAF3,COX7A1,COX7A2,NDUFA11,PPP2R2B,FEZ1,TOMM22,MFN2,WIPI1,ATP5IF1,HIGD2A,SAE1,SDHAF4
GO: Biological Process	GO:0019693	ribose phosphate metabolic process		1.583e-05	0.1013	0.002598	0.02426	45	585	DCAKD,ACOT4,NUDT14,DNAJC30,UQCC2,ATP5MG,NT5C2,OGDHL,MPC1,UQCRQ,SNCA,ATP5ME,ATP5PO,NDUFA2,NDUFA4,NDUFA9,NDUFA10,NDUFB1,SULT1A1,ACOT2,NME1,UQCR11,NPPA,ISCU,COX7A2L,NUP188,PDHB,PPCDC,HMGCL,PFKP,UQCR10,SLC25A23,NUDT7,COX5B,COX6C,COX7A1,COX7A2,COX7B,COX8A,NDUFA11,TKFC,AK5,DLD,HSD17B8,PPCS
GO: Biological Process	GO:0030049	muscle filament sliding		1.996e-05	0.1278	0.003194	0.02984	9	40	ACTA1,ACTN2,MYL2,TNNI3,TNNT1,TPM1,TPM3,MYL6B,DES
GO: Biological Process	GO:0006753	nucleoside phosphate metabolic process		2.067e-05	0.1323	0.003227	0.03015	51	702	DCAKD,ACOT4,AFMID,NUDT14,DNAJC30,UQCC2,DNPH1,ATP5MG,NT5C2,OGDHL,MPC1,UQCRQ,SNCA,ATP5ME,ATP5PO,NDUFA2,NDUFA4,NMRK2,NDUFA9,NDUFA10,NDUFB1,SULT1A1,ACOT2,NME1,UQCR11,NPPA,ISCU,HAAO,COX7A2L,NUP188,PDHB,PPCDC,HMGCL,PFKP,UQCR10,SLC25A23,NUDT7,COX5B,COX6C,COX7A1,COX7A2,COX7B,COX8A,NMNAT3,NDUFA11,TKFC,NT5M,AK5,DLD,HSD17B8,PPCS
GO: Biological Process	GO:0009259	ribonucleotide metabolic process		2.325e-05	0.1488	0.003543	0.0331	44	576	DCAKD,ACOT4,DNAJC30,UQCC2,ATP5MG,NT5C2,OGDHL,MPC1,UQCRQ,SNCA,ATP5ME,ATP5PO,NDUFA2,NDUFA4,NDUFA9,NDUFA10,NDUFB1,SULT1A1,ACOT2,NME1,UQCR11,NPPA,ISCU,COX7A2L,NUP188,PDHB,PPCDC,HMGCL,PFKP,UQCR10,SLC25A23,NUDT7,COX5B,COX6C,COX7A1,COX7A2,COX7B,COX8A,NDUFA11,TKFC,AK5,DLD,HSD17B8,PPCS
GO: Biological Process	GO:0033275	actin-myosin filament sliding		2.469e-05	0.158	0.003675	0.03433	9	41	ACTA1,ACTN2,MYL2,TNNI3,TNNT1,TPM1,TPM3,MYL6B,DES
GO: Biological Process	GO:0009117	nucleotide metabolic process		3.092e-05	0.1979	0.004497	0.04201	50	694	DCAKD,ACOT4,AFMID,DNAJC30,UQCC2,DNPH1,ATP5MG,NT5C2,OGDHL,MPC1,UQCRQ,SNCA,ATP5ME,ATP5PO,NDUFA2,NDUFA4,NMRK2,NDUFA9,NDUFA10,NDUFB1,SULT1A1,ACOT2,NME1,UQCR11,NPPA,ISCU,HAAO,COX7A2L,NUP188,PDHB,PPCDC,HMGCL,PFKP,UQCR10,SLC25A23,NUDT7,COX5B,COX6C,COX7A1,COX7A2,COX7B,COX8A,NMNAT3,NDUFA11,TKFC,NT5M,AK5,DLD,HSD17B8,PPCS
GO: Biological Process	GO:0048753	pigment granule organization		4.907e-05	0.314	0.006978	0.06519	7	26	ASIP,KIF13A,BCL2,SNAPIN,TYRP1,HPS1,TRAPPC6A
GO: Biological Process	GO:0002082	regulation of oxidative phosphorylation		6.373e-05	0.4078	0.008866	0.08282	8	36	DNAJC30,UQCC2,SNCA,ISCU,COX7A2L,SLC25A23,COX7A1,COX7A2
GO: Biological Process	GO:0006605	protein targeting		6.813e-05	0.436	0.009277	0.08666	36	457	RPL27A,RPS3,RPS6,RPS8,RPS10,RPS12,RPS18,RPS27A,ACOT4,SLC25A6,TRAK2,RPL10A,ACOT2,MTCL1,NOL3,OXA1L,SYNGR2,PEX7,HMGCL,UBB,CLU,PEX16,HOMER3,TOMM7,NUDT7,PPP2R2B,HACL1,TOMM22,KCNE1,RAB7A,MFN2,ATP5IF1,ZDHHC14,SAE1,LTBP2,RPL5
GO: Biological Process	GO:1901606	alpha-amino acid catabolic process		7.132e-05	0.4564	0.009459	0.08836	14	106	AFMID,CARNS1,ALDH4A1,ADHFE1,HAAO,PCBD1,HGD,SDSL,DDAH2,DDAH1,HMGCL,CRYM,IVD,DLD
GO: Biological Process	GO:0090257	regulation of muscle system process		7.242e-05	0.4635	0.009459	0.08836	27	303	F2R,MYL9,GTF2IRD2,PI16,SGCA,GLRX3,MYL2,MYL5,C12orf57,MSTN,STRIT1,ABCC8,NPPA,NOL3,CAMK2B,SPX,P2RX1,TNNI3,TNNT1,TPM1,HSPB6,PRKACA,CCN2,TRPM4,DAPK3,ACE2,PLCE1
GO: Biological Process	GO:1901135	carbohydrate derivative metabolic process		7.82e-05	0.5005	0.01001	0.0935	79	1299	DCAKD,B3GNT5,TNIP1,EXT1,EXTL1,ACOT4,OARD1,NUDT14,FMOD,PHLDA1,DNAJC30,MACROD1,UQCC2,DNPH1,AKR7A2,ATP5MG,CSPG5,NT5C2,NECAB3,OGDHL,MPC1,UQCRQ,ST6GALNAC4,TRAK2,SNCA,ATP5ME,B4GALNT1,ATP5PO,BCL2,NDUFA2,NDUFA4,NDUFA9,NDUFA10,NDUFB1,ADA2,DPM1,BGN,SULT1A1,ACOT2,NME1,UQCR11,NPPA,B3GNT9,OMD,ISCU,COX7A2L,NUP188,MGAT4B,PDHB,PPCDC,HMGCL,CYTL1,PFKP,UQCR10,DERL3,SDF2L1,SLC25A23,VEGFB,NUDT7,COX5B,COX6C,COX7A1,COX…
GO: Biological Process	GO:0006886	intracellular protein transport		9.34e-05	0.5978	0.01172	0.1095	90	1536	RPL27A,COPZ2,MNS1,MAP4,RPS3,RPS6,TBC1D7,RPS8,RPS10,RPS12,RPS18,SYNDIG1,RPS27A,ACOT4,ATAT1,IFT43,SLC25A6,ANP32B,SCG5,SLU7,SEC31A,RAB20,CCDC113,VIPAS39,MARK4,B9D1,TRAK2,KIF13A,KIF1A,LCA5L,BBS4,STAU1,RPL10A,DNAAF3,RAB24,ZPR1,AP3M2,ACOT2,MTCL1,RAB12,NPM1,NOL3,TMED4,PKIG,OXA1L,SYNGR2,NUP188,SNAPIN,DDX19B,VPS45,U2AF1L4,PEX7,HMGCL,TUBA4A,UBB,RAB33A,AP2M1,AP2S1,CLU,CBY1,DERL3,SNX8,PEX16,RAB26,HOMER3,TOMM…
GO: Biological Process	GO:0006123	mitochondrial electron transport, cytochrome c to oxygen		0.00012	0.7682	0.01449	0.1354	6	21	NDUFA4,COX7A2L,COX5B,COX6C,COX7B,COX8A
GO: Biological Process	GO:0019646	aerobic electron transport chain		0.00012	0.7682	0.01449	0.1354	6	21	NDUFA4,COX7A2L,COX5B,COX6C,COX7B,COX8A
GO: Biological Process	GO:0006811	ion transport		0.0001239	0.7931	0.01469	0.1372	109	1956	ACTN2,F2R,S100A1,S100A6,FCER1A,SCN2B,CXCL9,SCO1,RHCG,SFRP4,SLC25A5,SLC27A6,SLC25A6,PPFIA4,DNAJC30,UQCC2,APOE,SLC1A7,ARHGAP1,ATP5MG,ARL2,MPC1,UQCRQ,SNCA,ATP1A4,UNC80,CYB5R1,SLC25A45,GABRE,ATP5ME,ATP6V1G2,ATP5PO,CPLX1,BCL2,NDUFA2,NDUFA4,NDUFA9,NDUFA10,HCN2,NDUFB1,STRIT1,PER2,ABCC8,GLRB,GLRX,KCNMB4,UQCR11,SLC38A3,CA3,NPPA,NOL3,CAMK2B,GRK6,CAPN3,GRIA3,GRID1,CLIC6,SPX,TGFB2,ATP1B4,THY1,P2RX1,SLC16A5,P…
GO: Biological Process	GO:0006937	regulation of muscle contraction		0.0002349	1	0.02733	0.2553	19	193	F2R,MYL9,MYL2,MYL5,C12orf57,STRIT1,NPPA,SPX,P2RX1,TNNI3,TNNT1,TPM1,HSPB6,PRKACA,CCN2,TRPM4,DAPK3,ACE2,PLCE1
GO: Biological Process	GO:0015980	energy derivation by oxidation of organic compounds		0.0002995	1	0.03422	0.3197	26	313	OGDHL,UQCRQ,SNCA,NDUFA2,NDUFA4,NDUFA9,NDUFA10,NDUFB1,PER2,UQCR11,OXA1L,GYS1,ISCU,COX7A2L,PDHB,UQCR10,SLC25A23,COX5B,COX6C,COX7B,COX8A,NDUFA11,PRKACA,DLD,TRAP1,SDHAF4
GO: Biological Process	GO:0055114	oxidation-reduction process		0.0003115	1	0.03445	0.3218	73	1231	S100A1,MGST3,ALDH3B1,P3H3,GLRX3,VAT1L,APOE,AKR7A2,MSRB2,OGDHL,UQCRQ,ALDH4A1,SNCA,CYB5R1,NDUFA2,NDUFA4,NDUFA9,NDUFA10,NDUFB1,ADHFE1,PER2,GLRX,UQCR11,NPR3,PYROXD2,TXNDC17,OXA1L,GYS1,ISCU,TM7SF2,HAAO,COX7A2L,NUP188,HBA1,HBA2,HBB,PCBD1,HGD,DDAH2,DDAH1,DHRS3,PDHB,PEX7,PFKP,UQCR10,TYRP1,FADS2,PYCR2,SLC25A23,COX5B,COX6C,COX7A1,COX7A2,COX7B,COX8A,NDUFA11,CRYM,TKFC,PRKACA,HACL1,CYP2J2,CYP11A1,JMJD4,IVD,DI…
GO: Biological Process	GO:0006120	mitochondrial electron transport, NADH to ubiquinone		0.0003149	1	0.03445	0.3218	9	56	SNCA,NDUFA2,NDUFA4,NDUFA9,NDUFA10,NDUFB1,ISCU,NDUFA11,DLD
GO: Biological Process	GO:0055085	transmembrane transport		0.0003176	1	0.03445	0.3218	101	1830	ACTN2,RPS27A,F2R,S100A1,S100A6,SLC44A5,SCN2B,CXCL9,RHCG,SLC25A5,SLC25A6,DNAJC30,KLF15,UQCC2,SLC1A7,AZIN1,ATP5MG,MPC1,UQCRQ,SNCA,ATP1A4,UNC80,SLC25A45,GABRE,ATP5ME,ATP6V1G2,ATP5PO,CPLX1,BCL2,NDUFA2,NDUFA4,NDUFA9,NDUFA10,HCN2,NDUFB1,STRIT1,PER2,ABCC8,GLRB,GLRX,KCNMB4,OSCP1,UQCR11,SLC38A3,NPPA,NOL3,GRK6,CAPN3,GRIA3,GRID1,CLIC6,TGFB2,ATP1B4,THY1,P2RX1,SLC16A5,P2RX6,ISCU,COX7A2L,PRAF2,TNNI3,SLC26A4,TM…
GO: Biological Process	GO:0034622	cellular protein-containing complex assembly		0.000335	1	0.03574	0.3338	75	1276	MAP2,ZRSR2,RPS3,RPS10,RPS27A,ATAT1,CRACD,H2BC21,H4C8,COA5,SCO1,PSMG4,FMOD,ANP32B,SLU7,UQCC2,LMOD2,MSRB2,ARL2,EIF3I,SNCA,TMEM126B,NAP1L1,NAP1L3,BBS4,UNC13D,NDUFA2,NDUFA9,NDUFA10,NDUFB1,LSM3,DNAAF3,C9orf24,TAF10,DMAC1,TBCA,NPM1,NOL3,DMC1,GTF2B,OXA1L,POLR1E,COX7A2L,COX14,TPM1,CENPA,HMGB2,PFN1,UQCR10,TERF2IP,UBB,AP2M1,AP2S1,CLU,CLNS1A,GTF2H5,HSF1,NDUFAF3,COX7A1,COX7A2,XPA,NDUFA11,CRYAB,CLIP3,LRRC49,J…
GO: Biological Process	GO:0032438	melanosome organization		0.0003423	1	0.03592	0.3355	6	25	ASIP,KIF13A,SNAPIN,TYRP1,HPS1,TRAPPC6A
GO: Biological Process	GO:0034220	ion transmembrane transport		0.0003545	1	0.0366	0.3419	84	1469	ACTN2,F2R,S100A1,S100A6,SCN2B,CXCL9,RHCG,SLC25A5,SLC25A6,DNAJC30,UQCC2,SLC1A7,ATP5MG,MPC1,UQCRQ,SNCA,ATP1A4,UNC80,SLC25A45,GABRE,ATP5ME,ATP6V1G2,ATP5PO,NDUFA2,NDUFA4,NDUFA9,NDUFA10,HCN2,NDUFB1,STRIT1,PER2,ABCC8,GLRB,GLRX,KCNMB4,UQCR11,SLC38A3,NPPA,NOL3,GRK6,CAPN3,GRIA3,GRID1,CLIC6,TGFB2,ATP1B4,THY1,P2RX1,SLC16A5,P2RX6,ISCU,COX7A2L,PRAF2,TNNI3,SLC26A4,TMC6,PACSIN3,UQCR10,CLIC1,UCP2,HSPA2,SLC25A23,…
GO: Biological Process	GO:0060452	positive regulation of cardiac muscle contraction		0.0003912	1	0.03974	0.3712	5	17	STRIT1,NPPA,CCN2,TRPM4,ACE2
GO: Biological Process	GO:0009063	cellular amino acid catabolic process		0.0004154	1	0.04141	0.3868	14	125	AFMID,CARNS1,ALDH4A1,ADHFE1,HAAO,PCBD1,HGD,SDSL,DDAH2,DDAH1,HMGCL,CRYM,IVD,DLD
GO: Biological Process	GO:0003015	heart process		0.0004206	1	0.04141	0.3868	26	320	S100A1,SCN2B,GLRX3,SGCG,ATP1A4,MYL2,STRIT1,NPPA,SPX,TGFB2,TNNI3,TNNT1,TPM1,VEGFB,PRKACA,CCN2,TRPM4,CYP2J2,JAK2,DES,KCNE1,CXCR4,KCNJ4,PPCS,EDN3,ACE2
GO: Biological Process	GO:0035966	response to topologically incorrect protein		0.000503	1	0.04877	0.4556	19	205	BFAR,EXTL1,SEC31A,RNF126,CCND1,YIF1A,THBS4,PPP1R15A,CLU,DERL3,SDF2L1,HSF1,DNAJB2,HSPA2,DNAJC4,ATF6B,MFN2,HSPB8,WIPI1
GO: Biological Process	GO:0022411	cellular component disassembly		0.0005136	1	0.04906	0.4583	44	661	MAP2,MRPL37,ACTN2,CRACD,MRPS18B,APOE,LMOD2,VIPAS39,SMARCD3,SMARCE1,FSCN1,NES,H2AW,PER2,SQSTM1,ABCC8,DDR1,TGFB2,TGFB3,OXA1L,TPM1,SNAPIN,HMGB2,GABARAPL2,MRPL57,AP2M1,AP2S1,HSF1,HSPA2,TOMM7,IGFBP3,MRPL40,HTRA1,JMJD4,RAB7A,MFN2,EXOG,KLC1,WIPI1,ATP5IF1,DVL3,BMERB1,STMN1,MRPL46
GO: Cellular Component	GO:0005739	mitochondrion		5.261e-15	4.493e-12	4.493e-12	3.292e-11	141	1865	DCAKD,GATD3A,RPS3,MRPL37,PI4K2A,RPS27A,ACYP2,COA5,SCO1,SLC25A5,SLC25A6,CHCHD5,MRPS18B,DNAJC30,MACROD1,UQCC2,CHCHD6,TARS2,AKR7A2,ATP5MG,MSRB2,ARL2,EFHD1,GHITM,MTLN,OGDHL,MPC1,UQCRQ,ALDH4A1,TRAK2,SNCA,IFI6,CYB5R1,SLC25A45,ATP5ME,ATP5PO,PSENEN,TMEM126B,GATM,NARS1,BCL2,NDUFA2,NDUFA4,NDUFA9,NDUFA10,NDUFB1,MOAP1,SMIM4,RPL10A,ARMS2,ADHFE1,RAB24,FASTK,SQSTM1,ABCC8,GLRX,MLLT11,ACOT2,NME1,UQCR11,GNG5,DMAC1…
GO: Cellular Component	GO:0005740	mitochondrial envelope		1.342e-12	1.146e-09	5.73e-10	4.199e-09	75	800	RPS3,MRPL37,RPS27A,SCO1,SLC25A5,SLC25A6,CHCHD5,MRPS18B,DNAJC30,UQCC2,CHCHD6,ATP5MG,ARL2,EFHD1,GHITM,MTLN,MPC1,UQCRQ,SNCA,IFI6,SLC25A45,ATP5ME,ATP5PO,TMEM126B,GATM,BCL2,NDUFA2,NDUFA4,NDUFA9,NDUFA10,NDUFB1,MOAP1,GLRX,NME1,UQCR11,DMAC1,OXA1L,HAAO,COX7A2L,COX14,HMGCL,PPP1R15A,UQCR10,TUFM,MRPL57,UBB,CLU,UCP2,CEBPZOS,SLC25A23,TOMM7,LETMD1,COX5B,NDUFAF3,COX6C,COX7A1,COX7A2,COX7B,COX8A,ATP5MPL,NDUFA11,PP…
GO: Cellular Component	GO:0019866	organelle inner membrane		5.012e-12	4.28e-09	8.807e-10	6.454e-09	61	596	RPS3,MRPL37,SCO1,SLC25A5,SLC25A6,MRPS18B,DNAJC30,UQCC2,CHCHD6,ATP5MG,EFHD1,GHITM,MTLN,MPC1,UQCRQ,SNCA,IFI6,SLC25A45,ATP5ME,ATP5PO,TMEM126B,GATM,NDUFA2,NDUFA4,NDUFA9,NDUFA10,NDUFB1,UQCR11,DMAC1,ATP1B4,OXA1L,P2RX1,P2RX6,TM7SF2,COX7A2L,HMGCL,UQCR10,TUFM,MRPL57,CLU,UCP2,SLC25A23,LETMD1,COX5B,NDUFAF3,COX6C,COX7A1,COX7A2,COX7B,COX8A,ATP5MPL,NDUFA11,MRPL40,CYP11A1,TOMM22,EXOG,HIGD2A,TRAP1,COQ4,MRPL46,SD…
GO: Cellular Component	GO:0031966	mitochondrial membrane		5.111e-12	4.365e-09	8.807e-10	6.454e-09	71	756	RPS3,MRPL37,RPS27A,SCO1,SLC25A5,SLC25A6,MRPS18B,DNAJC30,UQCC2,CHCHD6,ATP5MG,EFHD1,GHITM,MTLN,MPC1,UQCRQ,SNCA,IFI6,SLC25A45,ATP5ME,ATP5PO,TMEM126B,GATM,BCL2,NDUFA2,NDUFA4,NDUFA9,NDUFA10,NDUFB1,MOAP1,NME1,UQCR11,DMAC1,OXA1L,HAAO,COX7A2L,COX14,HMGCL,PPP1R15A,UQCR10,TUFM,MRPL57,UBB,CLU,UCP2,CEBPZOS,SLC25A23,TOMM7,LETMD1,COX5B,NDUFAF3,COX6C,COX7A1,COX7A2,COX7B,COX8A,ATP5MPL,NDUFA11,PPP2R2B,MRPL40,CYP1…
GO: Cellular Component	GO:0005743	mitochondrial inner membrane		5.156e-12	4.404e-09	8.807e-10	6.454e-09	57	535	RPS3,MRPL37,SCO1,SLC25A5,SLC25A6,MRPS18B,DNAJC30,UQCC2,CHCHD6,ATP5MG,EFHD1,GHITM,MTLN,MPC1,UQCRQ,SNCA,IFI6,SLC25A45,ATP5ME,ATP5PO,TMEM126B,GATM,NDUFA2,NDUFA4,NDUFA9,NDUFA10,NDUFB1,UQCR11,DMAC1,OXA1L,COX7A2L,HMGCL,UQCR10,TUFM,MRPL57,CLU,UCP2,SLC25A23,LETMD1,COX5B,NDUFAF3,COX6C,COX7A1,COX7A2,COX7B,COX8A,ATP5MPL,NDUFA11,MRPL40,CYP11A1,TOMM22,EXOG,HIGD2A,TRAP1,COQ4,MRPL46,SDHAF4
GO: Cellular Component	GO:0031967	organelle envelope		7.023e-10	5.997e-07	8.924e-08	6.539e-07	95	1279	MNS1,RPS3,MRPL37,RPS27A,S100A6,MGST3,SCO1,SLC25A5,SLC25A6,CHCHD5,MRPS18B,DNAJC30,UQCC2,CHCHD6,APOE,AKR7A2,ATP5MG,ARL2,EFHD1,GHITM,MTLN,MPC1,UQCRQ,SNCA,IFI6,SLC25A45,ATP5ME,ATP5PO,TMEM126B,GATM,BCL2,NDUFA2,NDUFA4,NDUFA9,NDUFA10,NDUFB1,BANF1,MOAP1,GLRX,NME1,UQCR11,DMAC1,ATP1B4,OXA1L,P2RX1,P2RX6,TM7SF2,HAAO,COX7A2L,NUP188,COX14,DDX19B,TMC6,HMGCL,PPP1R15A,UQCR10,TERF2IP,TUFM,MRPL57,UBB,TFPT,CLU,CLIC1…
GO: Cellular Component	GO:0031975	envelope		7.315e-10	6.247e-07	8.924e-08	6.539e-07	95	1280	MNS1,RPS3,MRPL37,RPS27A,S100A6,MGST3,SCO1,SLC25A5,SLC25A6,CHCHD5,MRPS18B,DNAJC30,UQCC2,CHCHD6,APOE,AKR7A2,ATP5MG,ARL2,EFHD1,GHITM,MTLN,MPC1,UQCRQ,SNCA,IFI6,SLC25A45,ATP5ME,ATP5PO,TMEM126B,GATM,BCL2,NDUFA2,NDUFA4,NDUFA9,NDUFA10,NDUFB1,BANF1,MOAP1,GLRX,NME1,UQCR11,DMAC1,ATP1B4,OXA1L,P2RX1,P2RX6,TM7SF2,HAAO,COX7A2L,NUP188,COX14,DDX19B,TMC6,HMGCL,PPP1R15A,UQCR10,TERF2IP,TUFM,MRPL57,UBB,TFPT,CLU,CLIC1…
GO: Cellular Component	GO:0070469	respirasome		5.096e-08	4.352e-05	5.44e-06	3.987e-05	18	100	UQCRQ,NDUFA2,NDUFA4,NDUFA9,NDUFA10,NDUFB1,UQCR11,DMAC1,OXA1L,COX7A2L,UQCR10,COX7A1,COX7A2,COX7B,COX8A,NDUFA11,HIGD2A,SDHAF4
GO: Cellular Component	GO:0005746	mitochondrial respirasome		1.358e-06	0.001159	0.0001288	0.000944	15	88	UQCRQ,NDUFA2,NDUFA4,NDUFA9,NDUFA10,NDUFB1,DMAC1,OXA1L,COX7A2L,UQCR10,COX7A1,COX7A2,COX7B,NDUFA11,SDHAF4
GO: Cellular Component	GO:0097512	cardiac myofibril		9.628e-06	0.008222	0.0007679	0.005627	5	9	LMOD2,MYL2,TNNI3,CRYAB,DES
GO: Cellular Component	GO:0043292	contractile fiber		9.892e-06	0.008447	0.0007679	0.005627	26	259	ACTA1,SYNPO2L,ACTN2,S100A1,MYL9,SCO1,SORBS2,GLRX3,LMOD2,MYL2,MYL5,SQSTM1,CAPN3,PDLIM1,TNNI3,TNNT1,TPM1,TPM3,MYL7,MYOZ1,MYL6B,CRYAB,DES,KCNE1,C10orf71,MYOZ3
GO: Cellular Component	GO:0030017	sarcomere		2.736e-05	0.02337	0.001947	0.01427	23	227	ACTA1,SYNPO2L,ACTN2,S100A1,MYL9,SORBS2,GLRX3,LMOD2,MYL2,SQSTM1,CAPN3,PDLIM1,TNNI3,TNNT1,TPM1,TPM3,MYL7,MYOZ1,CRYAB,DES,KCNE1,C10orf71,MYOZ3
GO: Cellular Component	GO:0022627	cytosolic small ribosomal subunit		3.192e-05	0.02726	0.001989	0.01457	11	64	RPS3,RPS6,RPS8,RPS10,RPS12,RPS18,RPS27A,FAU,EIF3I,HBA1,HBA2
GO: Cellular Component	GO:0030016	myofibril		3.429e-05	0.02928	0.001989	0.01457	24	246	ACTA1,SYNPO2L,ACTN2,S100A1,MYL9,SCO1,SORBS2,GLRX3,LMOD2,MYL2,SQSTM1,CAPN3,PDLIM1,TNNI3,TNNT1,TPM1,TPM3,MYL7,MYOZ1,CRYAB,DES,KCNE1,C10orf71,MYOZ3
GO: Cellular Component	GO:0044391	ribosomal subunit		3.494e-05	0.02983	0.001989	0.01457	22	215	RPL27A,RPS3,RPS6,MRPL37,RPS8,RPS10,RPS12,RPS18,RPS27A,FAU,RPL22L1,MRPS18B,EIF3I,RPL10A,NPM1,HBA1,HBA2,MRPL57,MRPL40,RBM3,MRPL46,RPL5
GO: Cellular Component	GO:0098800	inner mitochondrial membrane protein complex		7.087e-05	0.06052	0.003783	0.02772	16	135	SLC25A6,CHCHD6,ATP5MG,UQCRQ,ATP5ME,ATP5PO,NDUFA2,NDUFA4,NDUFA9,NDUFA10,NDUFB1,DMAC1,UQCR10,ATP5MPL,NDUFA11,SDHAF4
GO: Cellular Component	GO:0015935	small ribosomal subunit		7.612e-05	0.06501	0.003824	0.02802	13	95	RPS3,RPS6,RPS8,RPS10,RPS12,RPS18,RPS27A,FAU,MRPS18B,EIF3I,NPM1,HBA1,HBA2
GO: Cellular Component	GO:0098803	respiratory chain complex		0.000105	0.08968	0.004982	0.03651	12	85	UQCRQ,NDUFA2,NDUFA4,NDUFA9,NDUFA10,NDUFB1,DMAC1,UQCR10,COX7B,COX8A,NDUFA11,SDHAF4
GO: Cellular Component	GO:0022626	cytosolic ribosome		0.0002242	0.1915	0.009587	0.07025	15	134	RPL27A,RPS3,RPS6,RPS8,RPS10,RPS12,RPS18,RPS27A,FAU,RPL22L1,EIF3I,RPL10A,HBA1,HBA2,RPL5
GO: Cellular Component	GO:0062023	collagen-containing extracellular matrix		0.0002245	0.1917	0.009587	0.07025	35	474	MDK,S100A6,S100A13,MFAP2,MFAP4,AEBP1,FMOD,APOE,ADAM19,NDP,SMOC2,BGN,NPPA,OMD,CBLN1,TGFB2,TGFB3,LEFTY2,THBS4,COL22A1,SERPINE2,CLU,CTHRC1,COL9A1,COL16A1,GDF15,ADAMTSL5,CSTB,CCN2,HTRA1,ASPN,P3H2,LTBP1,LTBP2,LUM
GO: Cellular Component	GO:0005759	mitochondrial matrix		0.000263	0.2246	0.0107	0.07837	35	478	RPS3,MRPL37,SLC25A5,MRPS18B,UQCC2,TARS2,ARL2,OGDHL,ALDH4A1,SNCA,NDUFA9,NDUFA10,ADHFE1,FASTK,ACOT2,RPUSD4,OXA1L,ISCU,PCCB,PDHB,HMGCL,TUFM,MRPL57,PYCR2,NMNAT3,MRPL40,CYP11A1,NT5M,IVD,DLD,HSD17B8,TSFM,TRAP1,MRPL46,SDHAF4
GO: Cellular Component	GO:0005865	striated muscle thin filament		0.000278	0.2374	0.01079	0.07907	7	34	ACTA1,ACTN2,LMOD2,TNNI3,TNNT1,TPM1,TPM3
GO: Cellular Component	GO:0001527	microfibril		0.0003923	0.335	0.01377	0.1009	4	10	MFAP2,MFAP4,ADAMTSL5,LTBP1
GO: Cellular Component	GO:0098798	mitochondrial protein complex		0.0003931	0.3357	0.01377	0.1009	23	271	MRPL37,SLC25A6,MRPS18B,CHCHD6,ATP5MG,UQCRQ,ATP5ME,ATP5PO,NDUFA2,NDUFA4,NDUFA9,NDUFA10,NDUFB1,DMAC1,UQCR10,MRPL57,TOMM7,ATP5MPL,NDUFA11,MRPL40,TOMM22,MRPL46,SDHAF4
GO: Cellular Component	GO:0036379	myofilament		0.0004032	0.3444	0.01377	0.1009	7	36	ACTA1,ACTN2,LMOD2,TNNI3,TNNT1,TPM1,TPM3
GO: Cellular Component	GO:1990204	oxidoreductase complex		0.0005697	0.4865	0.01871	0.1371	13	116	OGDHL,UQCRQ,NDUFA2,NDUFA4,NDUFA9,NDUFA10,NDUFB1,DMAC1,PDHB,UQCR10,NDUFA11,DLD,SDHAF4
GO: Cellular Component	GO:0097447	dendritic tree		0.001123	0.9589	0.03424	0.2509	48	779	MAP2,RPS3,RPS6,PI4K2A,SYNDIG1,ACTN2,TRAPPC4,SORBS2,GLRX3,DLGAP4,INPP5F,APOE,PABPC1,MARK4,TRAK2,FSCN1,SAMD4A,KIF1A,CPLX1,RGS11,HCN2,NCDN,STAU1,GLRB,GLRX,GNB3,CAMK2B,GRIA3,GRM1,THY1,P2RX6,ARHGAP33,PENK,MYL7,CLU,HOMER3,ICA1,CRYAB,FEZ1,PRKACA,BRINP1,KCNC4,KCNJ4,PLXDC1,RBM3,TTLL7,FARP1,LTBP1
GO: Cellular Component	GO:0030425	dendrite		0.001123	0.9589	0.03424	0.2509	48	779	MAP2,RPS3,RPS6,PI4K2A,SYNDIG1,ACTN2,TRAPPC4,SORBS2,GLRX3,DLGAP4,INPP5F,APOE,PABPC1,MARK4,TRAK2,FSCN1,SAMD4A,KIF1A,CPLX1,RGS11,HCN2,NCDN,STAU1,GLRB,GLRX,GNB3,CAMK2B,GRIA3,GRM1,THY1,P2RX6,ARHGAP33,PENK,MYL7,CLU,HOMER3,ICA1,CRYAB,FEZ1,PRKACA,BRINP1,KCNC4,KCNJ4,PLXDC1,RBM3,TTLL7,FARP1,LTBP1
GO: Cellular Component	GO:0005794	Golgi apparatus		0.001238	1	0.03646	0.2672	88	1643	COPZ2,B3GNT5,PAK4,RPS12,PI4K2A,SYNDIG1,EXT1,EXTL1,ATAT1,F2R,FGD1,TRAPPC4,FMOD,YIPF4,SEC31A,APOE,RAB20,AKR7A2,RND3,PACS1,ARL2,VIPAS39,CSPG5,TMBIM4,NECAB3,ST6GALNAC4,SNCA,KIF13A,TRAPPC2L,B4GALNT1,ADAM19,PSENEN,BGN,YIF1A,NSFL1C,FIBIN,AP3M2,RAB12,B3GNT9,CUX2,OMD,TMED4,TGFB2,SNAPIN,MGAT4B,VPS45,ENPP2,TMC6,PACSIN3,GABARAPL2,PPP1R15A,PLEKHB1,DUSP26,RAB33A,CLU,CBY1,RAB26,TRAPPC6A,GDF15,ICA1,ATF6B,ZFPL1,C…
GO: Cellular Component	GO:0005840	ribosome		0.001434	1	0.04082	0.2991	23	298	RPL27A,RPS3,RPS6,MRPL37,RPS8,RPS10,RPS12,RPS18,RPS27A,FAU,RPL22L1,MRPS18B,EIF3I,SNCA,RPL10A,NPM1,HBA1,HBA2,MRPL57,MRPL40,RBM3,MRPL46,RPL5
GO: Cellular Component	GO:0030018	Z disc		0.001562	1	0.04302	0.3153	14	145	SYNPO2L,ACTN2,S100A1,MYL9,SORBS2,GLRX3,CAPN3,PDLIM1,MYOZ1,CRYAB,DES,KCNE1,C10orf71,MYOZ3
Pathway	83098	Parkinson's disease	BioSystems: KEGG	1.531e-08	3.184e-05	1.061e-05	8.721e-05	23	142	SLC25A5,SLC25A6,UQCRQ,SNCA,ATP5PO,NDUFA2,NDUFA4,NDUFA9,NDUFA10,NDUFB1,UQCR11,COX7A2L,UQCR10,UBB,UCHL1,COX5B,COX6C,COX7A1,COX7A2,COX7B,COX8A,NDUFA11,PRKACA
Pathway	93344	Cardiac muscle contraction	BioSystems: KEGG	8.369e-08	0.0001741	3.482e-05	0.0002861	16	78	UQCRQ,ATP1A4,MYL2,UQCR11,ATP1B4,COX7A2L,TNNI3,TPM1,TPM3,UQCR10,COX5B,COX6C,COX7A1,COX7A2,COX7B,COX8A
Pathway	82942	Oxidative phosphorylation	BioSystems: KEGG	4.642e-07	0.0009656	0.0001609	0.001322	20	133	ATP5MG,UQCRQ,ATP5ME,ATP6V1G2,ATP5PO,NDUFA2,NDUFA4,NDUFA9,NDUFA10,NDUFB1,UQCR11,COX7A2L,UQCR10,COX5B,COX6C,COX7A1,COX7A2,COX7B,COX8A,NDUFA11
Pathway	83100	Huntington's disease	BioSystems: KEGG	1.4e-05	0.02912	0.00416	0.03419	22	193	SLC25A5,SLC25A6,UQCRQ,ATP5PO,NDUFA2,NDUFA4,NDUFA9,NDUFA10,NDUFB1,UQCR11,COX7A2L,UQCR10,AP2M1,AP2S1,COX5B,POLR2E,COX6C,COX7A1,COX7A2,COX7B,COX8A,NDUFA11
Pathway	83097	Alzheimer's disease	BioSystems: KEGG	2.351e-05	0.04889	0.006112	0.05022	20	171	APOE,UQCRQ,SNCA,ATP5PO,PSENEN,NDUFA2,NDUFA4,NDUFA9,NDUFA10,NDUFB1,UQCR11,COX7A2L,UQCR10,COX5B,COX6C,COX7A1,COX7A2,COX7B,COX8A,NDUFA11
Pathway	862188	Non-alcoholic fatty liver disease (NAFLD)	BioSystems: KEGG	0.0001294	0.2692	0.02243	0.1843	17	149	UQCRQ,NDUFA2,NDUFA4,NDUFA9,NDUFA10,NDUFB1,UQCR11,COX7A2L,UQCR10,COX5B,COX6C,COX7A1,COX7A2,COX7B,COX8A,NDUFA11,PRKAB1
Pathway	114229	Hypertrophic cardiomyopathy (HCM)	BioSystems: KEGG	0.0005552	1	0.04141	0.3403	11	83	SGCA,SGCG,ITGA10,MYL2,TGFB2,TGFB3,TNNI3,TPM1,TPM3,PRKAB1,DES
Pathway	1270127	Respiratory electron transport, ATP synthesis by chemiosmotic coupling, and heat production by uncoupling proteins.	BioSystems: REACTOME	1.4e-09	2.913e-06	1.576e-06	1.295e-05	23	126	SCO1,ATP5MG,UQCRQ,ATP5ME,ATP5PO,TMEM126B,NDUFA2,NDUFA4,NDUFA9,NDUFA10,NDUFB1,UQCR11,COX7A2L,COX14,UQCR10,UCP2,COX5B,NDUFAF3,COX6C,COX7B,COX8A,NDUFA11,TRAP1
Pathway	1270121	The citric acid (TCA) cycle and respiratory electron transport	BioSystems: REACTOME	1.516e-09	3.153e-06	1.576e-06	1.295e-05	27	171	SCO1,ATP5MG,MPC1,UQCRQ,ATP5ME,ATP5PO,TMEM126B,NDUFA2,NDUFA4,NDUFA9,NDUFA10,NDUFB1,ADHFE1,UQCR11,COX7A2L,COX14,PDHB,UQCR10,UCP2,COX5B,NDUFAF3,COX6C,COX7B,COX8A,NDUFA11,DLD,TRAP1
Pathway	1270128	Respiratory electron transport	BioSystems: REACTOME	3.197e-08	6.649e-05	1.662e-05	0.0001366	19	103	SCO1,UQCRQ,TMEM126B,NDUFA2,NDUFA4,NDUFA9,NDUFA10,NDUFB1,UQCR11,COX7A2L,COX14,UQCR10,COX5B,NDUFAF3,COX6C,COX7B,COX8A,NDUFA11,TRAP1
Pathway	1270158	Metabolism of amino acids and derivatives	BioSystems: REACTOME	0.0001133	0.2356	0.02142	0.176	31	367	RPL27A,RPS3,RPS6,RPS8,RPS10,RPS12,RPS18,RPS27A,AFMID,FAU,RPL22L1,CARNS1,AZIN1,ALDH4A1,GATM,RPL10A,ODC1,HAAO,PCBD1,HGD,PDHB,TYRP1,PYCR2,CRYM,PSMB2,PSMD8,IVD,DIO2,DLD,APIP,RPL5
Pathway	1269718	Nonsense Mediated Decay (NMD) independent of the Exon Junction Complex (EJC)	BioSystems: REACTOME	0.0002178	0.453	0.03353	0.2755	13	100	RPL27A,RPS3,RPS6,RPS8,RPS10,RPS12,RPS18,RPS27A,FAU,RPL22L1,PABPC1,RPL10A,RPL5
Pathway	1268684	Translation initiation complex formation	BioSystems: REACTOME	0.0002557	0.5319	0.03353	0.2755	10	64	RPS3,RPS6,RPS8,RPS10,RPS12,RPS18,RPS27A,FAU,PABPC1,EIF3I
Pathway	1309219	Pink/Parkin Mediated Mitophagy	BioSystems: REACTOME	0.0002579	0.5364	0.03353	0.2755	6	23	RPS27A,SQSTM1,UBB,TOMM7,TOMM22,MFN2
Pathway	1309218	Mitophagy	BioSystems: REACTOME	0.0002579	0.5364	0.03353	0.2755	6	23	RPS27A,SQSTM1,UBB,TOMM7,TOMM22,MFN2
Pathway	1268683	Activation of the mRNA upon binding of the cap-binding complex and eIFs, and subsequent binding to 43S	BioSystems: REACTOME	0.0002913	0.6059	0.03564	0.2929	10	65	RPS3,RPS6,RPS8,RPS10,RPS12,RPS18,RPS27A,FAU,PABPC1,EIF3I
Pathway	1268682	Formation of the ternary complex, and subsequently, the 43S complex	BioSystems: REACTOME	0.000363	0.7551	0.03575	0.2938	9	55	RPS3,RPS6,RPS8,RPS10,RPS12,RPS18,RPS27A,FAU,EIF3I
Pathway	1268688	L13a-mediated translational silencing of Ceruloplasmin expression	BioSystems: REACTOME	0.0003639	0.7568	0.03575	0.2938	14	119	RPL27A,RPS3,RPS6,RPS8,RPS10,RPS12,RPS18,RPS27A,FAU,RPL22L1,PABPC1,EIF3I,RPL10A,RPL5
Pathway	1269056	Infectious disease	BioSystems: REACTOME	0.0003812	0.7929	0.03575	0.2938	31	393	RPL27A,RPS3,RPS6,RPS8,RPS10,RPS12,RPS18,RPS27A,FAU,RPL22L1,SLC25A5,SLC25A6,PACS1,BANF1,RPL10A,SUPT5H,TAF10,NPM1,ELOB,GTF2B,NUP188,UBB,AP2M1,AP2S1,GTF2H5,POLR2E,ISG15,PSMB2,PSMD8,CXCR4,RPL5
Pathway	1269869	Striated Muscle Contraction	BioSystems: REACTOME	0.0003857	0.8023	0.03575	0.2938	7	34	ACTN2,MYL2,TNNI3,TNNT1,TPM1,TPM3,DES
Pathway	1268691	Peptide chain elongation	BioSystems: REACTOME	0.0004048	0.842	0.03575	0.2938	12	93	RPL27A,RPS3,RPS6,RPS8,RPS10,RPS12,RPS18,RPS27A,FAU,RPL22L1,RPL10A,RPL5
Pathway	1269120	Viral mRNA Translation	BioSystems: REACTOME	0.0004048	0.842	0.03575	0.2938	12	93	RPL27A,RPS3,RPS6,RPS8,RPS10,RPS12,RPS18,RPS27A,FAU,RPL22L1,RPL10A,RPL5
Pathway	1268681	Formation of a pool of free 40S subunits	BioSystems: REACTOME	0.0004274	0.889	0.03575	0.2938	13	107	RPL27A,RPS3,RPS6,RPS8,RPS10,RPS12,RPS18,RPS27A,FAU,RPL22L1,EIF3I,RPL10A,RPL5
Pathway	1309221	Histidine, lysine, phenylalanine, tyrosine, proline and tryptophan catabolism	BioSystems: REACTOME	0.0004297	0.8938	0.03575	0.2938	8	45	AFMID,CARNS1,ALDH4A1,HAAO,PCBD1,HGD,CRYM,DLD
Pathway	1339156	Selenocysteine synthesis	BioSystems: REACTOME	0.0005431	1	0.04141	0.3403	12	96	RPL27A,RPS3,RPS6,RPS8,RPS10,RPS12,RPS18,RPS27A,FAU,RPL22L1,RPL10A,RPL5
Pathway	1269870	Smooth Muscle Contraction	BioSystems: REACTOME	0.0005575	1	0.04141	0.3403	7	36	MYL9,MYL12A,MYL5,TPM1,TPM3,MYL7,MYL6B
Pathway	1268692	Eukaryotic Translation Termination	BioSystems: REACTOME	0.0005973	1	0.04284	0.352	12	97	RPL27A,RPS3,RPS6,RPS8,RPS10,RPS12,RPS18,RPS27A,FAU,RPL22L1,RPL10A,RPL5
Pathway	1268690	Eukaryotic Translation Elongation	BioSystems: REACTOME	0.0006559	1	0.04547	0.3737	12	98	RPL27A,RPS3,RPS6,RPS8,RPS10,RPS12,RPS18,RPS27A,FAU,RPL22L1,RPL10A,RPL5
Pathway	1268679	Eukaryotic Translation Initiation	BioSystems: REACTOME	0.0007067	1	0.04594	0.3775	14	127	RPL27A,RPS3,RPS6,RPS8,RPS10,RPS12,RPS18,RPS27A,FAU,RPL22L1,PABPC1,EIF3I,RPL10A,RPL5
Pathway	1268680	Cap-dependent Translation Initiation	BioSystems: REACTOME	0.0007067	1	0.04594	0.3775	14	127	RPL27A,RPS3,RPS6,RPS8,RPS10,RPS12,RPS18,RPS27A,FAU,RPL22L1,PABPC1,EIF3I,RPL10A,RPL5
Pathway	1269868	Muscle contraction	BioSystems: REACTOME	0.0007381	1	0.04652	0.3823	19	204	ACTN2,MYL9,SCN2B,MYL12A,ATP1A4,MYL2,MYL5,NPPA,CAMK2B,TNNI3,TNNT1,TPM1,TPM3,MYL7,MYL6B,PRKACA,DES,KCNE1,KCNJ4
Pathway	1269108	Influenza Infection	BioSystems: REACTOME	0.0007768	1	0.04752	0.3905	16	158	RPL27A,RPS3,RPS6,RPS8,RPS10,RPS12,RPS18,RPS27A,FAU,RPL22L1,SLC25A6,RPL10A,NUP188,POLR2E,ISG15,RPL5
Pathway	SMP00359	Diltiazem Pathway	SMPDB	9.428e-05	0.1961	0.01961	0.1611	10	57	MYL9,ATP1A4,MYL2,ABCC8,TNNI3,TPM1,TPM3,KCNE1,KCNJ4,EDNRA
Pathway	SMP00375	Verapamil Pathway	SMPDB	9.428e-05	0.1961	0.01961	0.1611	10	57	MYL9,ATP1A4,MYL2,ABCC8,TNNI3,TPM1,TPM3,KCNE1,KCNJ4,EDNRA
Pubmed	18614015	A mitochondrial protein compendium elucidates complex I disease biology.	Pubmed	2.189e-29	1.493e-24	1.493e-24	1.748e-23	91	965	DCAKD,GATD3A,MRPL37,ACYP2,COA5,SCO1,SLC25A5,MRPS18B,DNAJC30,UQCC2,TARS2,AKR7A2,ATP5MG,MSRB2,EFHD1,GHITM,MPC1,UQCRQ,ALDH4A1,CYB5R1,SLC25A45,ATP5ME,ATP5PO,GATM,NARS1,BCL2,NDUFA2,NDUFA4,NDUFA9,NDUFA10,SMIM4,RPL10A,ADHFE1,RAB24,FASTK,GLRX,NME1,UQCR11,GNG5,DEPP1,RPUSD4,OXA1L,ISCU,COX7A2L,PCCB,COX14,SDSL,DDAH1,PDHB,HMGCL,UQCR10,PLA2G15,TUFM,DUSP26,MRPL57,UCP2,SLC25A23,DNAJC4,TOMM7,LETMD1,COX5B,NDUFAF3,…
Pubmed	20877624	Genetic variants in nuclear-encoded mitochondrial genes influence AIDS progression.	Pubmed	5.274e-28	3.596e-23	1.798e-23	2.105e-22	87	926	DCAKD,GATD3A,MRPL37,ACYP2,SCO1,MRPS18B,DNAJC30,UQCC2,TARS2,AKR7A2,ATP5MG,MSRB2,EFHD1,GHITM,OGDHL,MPC1,UQCRQ,ALDH4A1,CYB5R1,ATP5ME,ATP5PO,GATM,NARS1,BCL2,NDUFA2,NDUFA4,NDUFA9,NDUFA10,RPL10A,ADHFE1,RAB24,FASTK,GLRX,ACOT2,NME1,UQCR11,GNG5,DEPP1,RPUSD4,OXA1L,ISCU,COX7A2L,PCCB,COX14,SDSL,DDAH1,PDHB,HMGCL,UQCR10,PLA2G15,TUFM,DUSP26,MRPL57,UCP2,SLC25A23,DNAJC4,TOMM7,LETMD1,COX5B,NDUFAF3,COX6C,COX7A1,COX…
Pubmed	16189514	Towards a proteome-scale map of the human protein-protein interaction network.	Pubmed	3.046e-21	2.077e-16	5.509e-17	6.45e-16	104	1573	TSR2,CNKSR1,MNS1,SNAPC5,MIF4GD,TNIP1,RPS27A,MEA1,S100A1,TADA3,FOXS1,SORBS2,SLC25A6,PHLDA1,GLRX3,MRPS18B,YIPF4,SLU7,LLPH,C7orf50,DNPH1,RNF126,ZNF414,CCDC197,AKR7A2,FAM214B,ARHGAP1,BEX3,ARL2,VIPAS39,NT5C2,DLK2,RASL11B,TRAPPC2L,DOK5,NDUFB1,MOAP1,RRAGC,LSM3,SOCS2,H2AW,GADD45G,FASTK,SQSTM1,PPIL3,POLL,NME1,C19orf25,TCEA2,ELOB,RBPMS,NOL3,TRIM41,CAPN3,DEPP1,TEAD3,BORCS8,PDLIM1,PCNX4,GYS1,HAAO,COX7A2L,TNN…
Pubmed	16169070	A human protein-protein interaction network: a resource for annotating the proteome.	Pubmed	3.232e-21	2.204e-16	5.509e-17	6.45e-16	108	1675	GATD3A,MAP4,RPS3,USP11,RPS6,PAK4,RPS10,SYNDIG1,ACTN2,RPS27A,MDK,MAP3K3,NPM3,S100A13,H2AC6,FAU,MYL9,MGST3,TRAPPC4,TADA3,SORBS2,SLC27A6,SLC25A6,GLRX3,SCG5,DLGAP4,PLEKHA4,LYAR,CCDC113,PELP1,MARK4,CHFR,MPC1,UQCRQ,FSCN1,SNRPN,MYL2,C9orf78,NACA,NAP1L1,FRS3,NMRK2,DPM1,LSM3,NSFL1C,SUPT5H,SQSTM1,ZPR1,TAF10,SLC38A3,TCEA2,DDR1,ADAP1,TRIM41,GRK6,SPACA9,PDLIM1,FIBP,HBA1,HBA2,TNNT1,HBB,TPD52L1,SNAPIN,DDX19B,MG…
Pubmed	31536960	Rewiring of the Human Mitochondrial Interactome during Neuronal Reprogramming Reveals Regulators of the Respirasome and Neurogenesis.	Pubmed	2.761e-19	1.882e-14	3.765e-15	4.408e-14	70	858	GATD3A,LYPLAL1,MCAM,MGST3,PTRHD1,SLC25A5,MACROD1,APOE,MYL12A,ATP5MG,MSRB2,UQCRQ,ALDH4A1,EIF3I,CYB5R1,ATP5ME,ATP5PO,NAP1L1,NDUFA2,NDUFA4,NDUFA9,NDUFB1,PROM1,NSFL1C,SQSTM1,MLLT11,GNG5,TBCA,C1orf198,THY1,PAFAH2,COX7A2L,PCCB,DDAH2,DDAH1,PDHB,GABARAPL2,HMGCL,PFDN4,TUFM,CLIC1,UCHL1,PYCR2,HSPA2,RAB26,COX5B,NDUFAF3,COX6C,COX7A2,COX7B,COX8A,SPATA20,NDUFA11,ISG15,ABHD11,DAD1,IVD,DES,TOMM22,KCNMB1,DIO2,RAB7…
Pubmed	8125298	Oligo-capping: a simple method to replace the cap structure of eukaryotic mRNAs with oligoribonucleotides.	Pubmed	8.04e-19	5.482e-14	9.136e-15	1.07e-13	111	1885	CNKSR1,RPS3,TCEAL4,TBC1D7,RPS27A,ATAT1,MAP3K3,MFAP2,MGST3,GTF2IRD2,TRAPPC4,SORBS2,GLRX3,ANP32B,SIAH2,SEC31A,TARS2,ZNF414,AKR7A2,MYL12A,ARL2,VIPAS39,CCDC59,TMBIM4,GHITM,ZSCAN18,OGDHL,ALDH4A1,EIF3I,KIF13A,SNRPN,CYB5R1,ATP5PO,JAGN1,ADAM18,NACA,NAP1L3,GATM,NARS1,TSPAN9,BGN,PROM1,YIF1A,NSFL1C,FASTK,C9orf24,MICA,ACOT2,EBNA1BP2,CAMK2B,PYROXD2,OMD,ORC5,RPUSD4,HEY1,POLR1E,GYS1,FIBP,HBA1,TNNI3,PCBP2,PCCB,F…
Pubmed	17207965	hORFeome v3.1: a resource of human open reading frames representing over 10,000 human genes.	Pubmed	2.697e-18	1.839e-13	2.627e-14	3.075e-13	102	1677	TSR2,VGLL2,TCEAL4,MRPL37,TBC1D7,RPS8,TMEM74,SKA2,SYNDIG1,RPS27A,IFT43,NPM3,AMZ2,MFAP4,H2BC21,MGST3,PTRHD1,CXCL9,ARRDC3,SMIM19,SLC25A5,DNAJC30,VAT1L,BEX3,FAM228B,CCDC59,CDC26,CXorf56,CCDC74A,ZNF415,CYB5R1,SLC25A45,DTD1,GABRE,NDUFA9,DPM1,C9orf24,CA3,C19orf25,C19orf48,ESM1,P2RX1,MAEL,NXPH4,EDA2R,COX14,UBL7,DDX19B,HGD,CENPA,CIART,PEX7,TERF2IP,TUFM,DUSP26,TFPT,PDCL3,HPS1,PEX16,QPCT,C11orf71,PYCR2,DNAJ…
Pubmed	27499296	Mitochondrial Protein Interaction Mapping Identifies Regulators of Respiratory Chain Function.	Pubmed	3.716e-18	2.534e-13	3.167e-14	3.708e-13	46	413	DCAKD,GATD3A,SCO1,SLC25A5,SLC25A6,UQCC2,CHCHD6,TARS2,ATP5MG,MSRB2,EFHD1,GHITM,UQCRQ,CYB5R1,ATP5ME,ATP5PO,NDUFA2,NDUFA4,NDUFA9,NDUFA10,NDUFB1,RAB24,NME1,GNG5,OXA1L,ISCU,COX7A2L,DDAH1,UQCR10,MRPL57,NDUFAF3,COX6C,COX7A2,COX8A,SPATA20,NDUFA11,MRPL40,ABHD11,IVD,TOMM22,BOLA1,BOLA3,TSFM,COQ4,MRPL46,SDHAF4
Pubmed	23376485	Proteomic analysis of podocyte exosome-enriched fraction from normal human urine.	Pubmed	1.07e-16	7.292e-12	8.103e-13	9.486e-12	101	1744	MAP4,LYPLAL1,RPS3,RPS8,RPS10,RPS18,ACTN2,RPS27A,RRAS,S100A6,S100A13,MFAP4,CYS1,MGST3,H4C8,PTRHD1,ALDH3B1,NUDT14,SLC25A5,PI16,GLRX3,APOE,DNPH1,MYL12A,RND3,ARHGAP1,ATP5MG,ARL2,EFHD1,RNASET2,GHITM,DLK2,IAH1,ATP5PO,NACA,GATM,NDUFA4,NDUFB1,BANF1,BGN,PROM1,BPI,GLRX,ACOT2,NME1,GNG5,TBCA,ELOB,DDR1,NPR3,TXNDC17,TMED4,THY1,SYNGR2,FIBP,HAAO,HBA1,HBA2,HBB,PCBD1,PCBP2,HGD,SDSL,DDAH2,DDAH1,PDHB,SLC26A4,PACSIN3…
Pubmed	19738201	Proteomic analysis of integrin-associated complexes identifies RCC2 as a dual regulator of Rac1 and Arf6.	Pubmed	1.564e-14	1.067e-09	1.067e-10	1.249e-09	55	707	RPL27A,MAP4,RPS3,RPS6,RPS8,RPS10,RPS12,RPS18,RPS27A,FAU,H4C8,SLC25A5,GLRX3,ANP32B,SEC31A,PABPC1,AKR7A2,ARL2,PELP1,EIF3I,FSCN1,ATP5ME,ATP5PO,NACA,NARS1,NDUFA2,NDUFA9,RPL10A,SUPT5H,NPM1,NUP188,HBA1,HBA2,PCBP2,TPM3,DDAH2,PDHB,HMGB2,PFKP,PFN1,TUFM,UBB,AP2M1,AP2S1,CLIC1,CLNS1A,PYCR2,PSMB2,RAB7A,DLD,RBM3,STMN1,TRAP1,MRTO4,RPL5
Pubmed	15342556	Sequence comparison of human and mouse genes reveals a homologous block structure in the promoter regions.	Pubmed	5.251e-14	3.58e-09	3.255e-10	3.81e-09	78	1293	GATD3A,B3GNT5,TCEAL4,TBC1D7,SNAPC5,MIF4GD,ETV4,TNIP1,ATAT1,MFAP4,FAU,TRAPPC4,GLRX3,MRPS18B,SCG5,YIPF4,TARS2,BCAS4,CHFR,NT5C2,OGDHL,GADD45B,ATP6V1G2,JAGN1,TMEM126B,C12orf57,NDUFA10,RPL10A,BPI,SUPT5H,GLRX,SLC38A3,C19orf25,NPM1,NOL3,GTF2B,OXA1L,HEY1,GYS1,ISCU,EDA2R,COX14,TPD52L1,UBL7,PENK,PEX7,TUBA4A,DUSP26,ITGBL1,UBB,CLU,UCHL1,SNX8,PPDPF,PPP2R2B,MRPL40,DCAF8,ASPN,FBXL12,DAD1,MAP3K7CL,PSMD8,LYPD1,TX…
Pubmed	27609421	TNIP2 is a Hub Protein in the NF-?B Network with Both Protein and RNA Mediated Interactions.	Pubmed	7.239e-13	4.936e-08	4.113e-09	4.816e-08	61	922	USP11,TBC1D7,ACTA1,RPS8,RPS10,RPS12,EXT1,RPL22L1,TADA3,PSMG4,MED30,SLC25A5,SLC25A6,ANP32B,PABPC1,MT2A,CCDC59,EIF3I,ATP5ME,C9orf78,NAP1L1,NAP1L3,BCL2,DPM1,RPL10A,SUPT5H,SQSTM1,GLRB,MTCL1,EBNA1BP2,TAF10,TBCA,ELOB,TXNDC17,FAM200B,PCBD1,TPD52L1,PDHB,HMGB2,PFDN4,PFN1,TUFM,SERPINE2,CBY1,PYCR2,HSPA2,COX7A2,ZCRB1,CSTB,PSMB2,FBXL12,URB1,SBDSP1,ATP5IF1,SMIM8,AKIRIN2,STMN1,TRAP1,EFNA1,SBDS,LEF1
Pubmed	14651853	Integrated analysis of protein composition, tissue diversity, and gene regulation in mouse mitochondria.	Pubmed	9.793e-13	6.678e-08	5.137e-09	6.014e-08	42	491	GATD3A,SLC25A5,MACROD1,AKR7A2,ATP5MG,RNASET2,UQCRQ,ALDH4A1,ATP5PO,GATM,BCL2,NDUFA2,NDUFA4,NDUFA9,NDUFA10,UQCR11,OXA1L,ISCU,FIBP,COX7A2L,PCCB,PDHB,HMGCL,UQCR10,TUFM,AP2M1,UCP2,HSPA2,COX5B,COX6C,COX7A1,COX7A2,COX7B,COX8A,NDUFA11,CYP11A1,NT5M,IVD,DLD,HSD17B8,ATP5IF1,TRAP1
Pubmed	21832049	Interactions of pathological hallmark proteins: tubulin polymerization promoting protein/p25, beta-amyloid, and alpha-synuclein.	Pubmed	1.724e-12	1.175e-07	8.395e-09	9.828e-08	96	1891	GATD3A,MAP2,ZRSR2,TBC1D7,PAK4,RPS10,RPS12,TIGD1,ETV4,RPS18,RPS27A,ATAT1,PRR16,COA5,TRAPPC4,OARD1,FOXS1,MED30,PHLDA1,SGCG,ANP32B,LLPH,CHCHD6,C7orf50,VAT1L,ZNF365,FAM214B,CCDC59,CXorf56,ZSCAN18,DLK2,NECAB3,RASL11B,ALDH4A1,SNCA,IFI6,TRAPPC2L,MYL5,JAGN1,C9orf78,TMEM126B,NDP,NDUFA2,NDUFA4,NMRK2,NDUFB1,MSTN,STAU1,GADD45G,POLL,DMAC1,NPM1,TCEA2,TRIM41,CDPF1,SPX,P2RX6,GYS1,FIBP,MTURN,DDX19B,CIART,HMGB2,GA…
Pubmed	21900206	A directed protein interaction network for investigating intracellular signal transduction.	Pubmed	1.999e-12	1.363e-07	9.087e-09	1.064e-07	68	1123	RIN3,MAP4,MRPL37,RPS10,MDK,MAP3K3,NPM3,AMPH,SORBS2,GLRX3,DLGAP4,SEC31A,RNF126,FRZB,SNCA,FSCN1,C9orf78,NAP1L1,NDUFA2,NMRK2,STAU1,YIF1A,NSFL1C,GADD45G,SQSTM1,GLRX,DDR1,ADAP1,PYROXD2,SPACA9,ODC1,PDLIM1,FIBP,HAAO,HBA1,TNNT1,ZBED1,TPM3,DDAH2,PDHB,PFDN1,GABARAPL2,HMGCL,CHN1,SEMA5B,POLR2E,LENG1,CRYM,PPP4C,FEZ1,PRKAB1,CSTB,HACL1,MAP2K5,MASP1,GADD45A,URB1,KLC1,RAD9A,RAD23A,ATP5IF1,DVL3,MYOZ3,STMN1,KIAA119…
Pubmed	22863883	A high-throughput approach for measuring temporal changes in the interactome.	Pubmed	2.926e-12	1.995e-07	1.247e-08	1.46e-07	80	1455	RPL27A,MAP2,MAP4,RPS3,USP11,TCEAL4,RPS6,ACTA1,RPS8,RPS10,RPS12,RPS18,RPS27A,MEA1,NPM3,S100A13,FAU,MYL9,OARD1,GLRX3,ANP32B,PABPC1,MYL12A,ARL2,NT5C2,EIF3I,SNCA,KIF13A,DTD1,C9orf78,NACA,NAP1L1,NARS1,UNC13D,NCDN,NSFL1C,SUPT5H,SQSTM1,ZPR1,NME1,NPM1,ELOB,NOL3,PDLIM1,NUP188,UBL7,TPM1,TPM3,DDX19B,PDHB,HMGB2,PFDN1,PFDN4,PFKP,TUBA4A,TERF2IP,TUFM,SERPINE2,CLU,CLNS1A,TSEN34,SDF2L1,HSF1,POLR2E,TKFC,PPP4C,PRKA…
Pubmed	29845934	The HIV-1 Tat protein recruits a ubiquitin ligase to reorganize the 7SK snRNP for transcriptional activation.	Pubmed	4.817e-11	3.285e-06	1.932e-07	2.262e-06	66	1153	RPL27A,MAP4,RPS3,USP11,RPS6,MRPL37,ACTA1,RPS8,RPS10,RPS12,RPS18,RPS27A,RRAS,NPM3,H2AC6,FAU,H2BC21,MYL9,GTF2IRD2,SLC25A5,SLC25A6,MRPS18B,C7orf50,PABPC1,MYL12A,ATP5MG,SMARCE1,EIF3I,ATP1A4,SNRPN,ATP5PO,NACA,NAP1L1,BANF1,LSM3,STAU1,RPL10A,H2AW,RAB12,NPM1,HBA1,PCBP2,U2AF1L4,HMGB2,PFN1,TUBA4A,TUFM,UBB,AP2M1,MYL6B,CLNS1A,TSEN34,HSPA2,CHD5,ZCRB1,CSTB,MRPL40,PSMB2,PSMD8,EXOG,PCBP4,RBM3,NUBP2,TRAP1,MRPL46,…
Pubmed	25963833	Quantitative Proteomics Reveals Dynamic Interactions of the Minichromosome Maintenance Complex (MCM) in the Cellular Response to Etoposide Induced DNA Damage.	Pubmed	5.441e-11	3.71e-06	2.061e-07	2.413e-06	54	844	DCAKD,RPL27A,RPS3,ACTA1,RPS8,RPS10,RPS12,RPS18,RPS27A,NPM3,H2AC6,H2BC21,MYL9,MGST3,H4C8,RPL22L1,SLC25A5,SLC25A6,SIAH2,PABPC1,MYL12A,PELP1,IAH1,FSCN1,NES,ATP5PO,NACA,NAP1L1,NARS1,DPM1,STAU1,RPL10A,H2AW,GLRX,NME1,NPM1,ELOB,HBB,PCBP2,TPM3,PFKP,PFN1,TUBA4A,UBBP4,TUFM,UBB,CLU,SDF2L1,HSPA2,PPP2R2B,CSTB,PSMB2,RBM3,RPL5
Pubmed	16916647	Substrate and functional diversity of lysine acetylation revealed by a proteomics survey.	Pubmed	7.16e-11	4.882e-06	2.569e-07	3.008e-06	23	182	GATD3A,ACTA1,H2BC21,SLC25A5,ATP5MG,MT2A,ALDH4A1,ATP5PO,NDUFA2,NDUFA4,NDUFA9,NDUFA10,RPL10A,NPM1,HBB,PCCB,TPM3,HMGCL,PFN1,COX6C,IVD,HSD17B8,TRAP1
Pubmed	22623428	Proteomic analysis of ?4?1 integrin adhesion complexes reveals ?-subunit-dependent protein recruitment.	Pubmed	2.196e-10	1.497e-05	7.487e-07	8.765e-06	38	491	RPL27A,RPS3,RPS6,RPS8,RPS10,RPS18,RPS27A,H2AC6,H4C8,SLC25A5,GLRX3,ANP32B,SEC31A,PABPC1,AKR7A2,MYL12A,EIF3I,ATP5ME,ATP5PO,NDUFA2,LSM3,RPL10A,H2AW,NPM1,NUP188,HBA1,HBA2,PCBP2,PFKP,PFN1,UBB,AP2M1,AP2S1,CLIC1,PSMB2,RBM3,STMN1,RPL5
Pubmed	28515276	Assembly of the U5 snRNP component PRPF8 is controlled by the HSP90/R2TP chaperones.	Pubmed	4.721e-10	3.219e-05	1.533e-06	1.795e-05	73	1415	RPL27A,MAP4,RPS3,RPS6,TBC1D7,ACTA1,RPS8,RPS10,RPS12,RPS18,RPS27A,NPM3,FAU,MGST3,SCO1,RPL22L1,SLC25A5,SLC25A6,GLRX3,ANP32B,MRPS18B,C7orf50,SEC31A,LYAR,PABPC1,MYL12A,PELP1,SMARCE1,IAH1,EIF3I,FSCN1,SNRPN,ATP5PO,C9orf78,NACA,NAP1L1,NARS1,NDUFA4,NDUFA9,DPM1,NCDN,RPL10A,PPIL3,MTCL1,EBNA1BP2,NME1,NPM1,ELOB,TXNDC17,GTF2B,OXA1L,PCBP2,TPM3,U2AF1L4,PACSIN3,PFKP,PFN1,TUBA4A,TUFM,AP2M1,CLIC1,SDF2L1,HSF1,POLR2…
Pubmed	27432908	Defining the Protein-Protein Interaction Network of the Human Protein Tyrosine Phosphatase Family.	Pubmed	6.746e-10	4.599e-05	2.091e-06	2.448e-05	55	931	DCAKD,GATD3A,RPS12,RPS27A,RRAS,SCO1,RPL22L1,PHLDB3,GLRX3,ANP32B,DNAJC30,MACROD1,UQCC2,AKR7A2,NT5C2,ATP5PO,NARS1,NDUFA9,NCDN,SUPT5H,EBNA1BP2,NME1,C19orf25,PTPN21,GTF2B,OXA1L,PRAF2,FAM177A1,PFDN1,PFDN4,DUSP26,AP2M1,TSEN34,SDF2L1,CCDC28A,POLR2E,NDUFAF3,PNKD,NDUFA11,PPP2R2B,PPP4C,CSTB,DCAF8,FBXL12,PSMD8,DNAAF5,TOMM22,PTPRR,GATD1,RAD23A,ATP5IF1,NKIRAS2,MRTO4,MRPL46,RPL5
Pubmed	18614564	Proteomics analysis identifies phosphorylation-dependent alpha-synuclein protein interactions.	Pubmed	1.067e-09	7.276e-05	3.164e-06	3.704e-05	20	157	MAP2,MAP4,RPS10,MGST3,UQCRQ,SNCA,BRSK1,NDUFA2,NDUFA9,NDUFA10,CAMK2B,THY1,COX7A2L,UQCR10,AP2M1,COX5B,COX6C,COX7A2,NDUFA11,TOMM22
Pubmed	24344204	TIMMDC1/C3orf1 functions as a membrane-embedded mitochondrial complex I assembly factor through association with the MCIA complex.	Pubmed	1.237e-09	8.431e-05	3.513e-06	4.113e-05	17	112	SCO1,SLC25A6,GHITM,UNC80,ATP5ME,TMEM126B,NDUFA2,NDUFA4,NDUFA9,NDUFA10,NDUFB1,COX7A2L,UQCR10,COX5B,NDUFAF3,COX6C,NDUFA11
Pubmed	23443559	LGALS3BP regulates centriole biogenesis and centrosome hypertrophy in cancer cells.	Pubmed	3.514e-09	0.0002396	9.584e-06	0.0001122	42	639	RPS3,USP11,TCEAL4,RPS6,ACTA1,RPS8,RPS10,RPS12,RPS18,S100A13,MFAP4,FAU,H4C8,TADA3,MRPS18B,UQCC2,PABPC1,CDC26,SMARCE1,NAP1L1,CCND1,LSM3,RPL10A,NSFL1C,EBNA1BP2,NME1,NPM1,HBA1,HBB,PCBP2,TUBA4A,UBB,MYL6B,HSPA2,NDUFAF3,MRPL40,DCAF8,GALNT18,RAD23A,TRAP1,MRPL46,RPL5
Pubmed	21044950	Genome-wide YFP fluorescence complementation screen identifies new regulators for telomere signaling in human cells.	Pubmed	7.132e-09	0.0004863	1.803e-05	0.0002111	28	330	MAP4,PAK4,AMPH,NUDT14,LYAR,DNPH1,ZNF414,C9orf78,NAP1L1,NCDN,SUPT5H,MICA,TBCA,NOL3,TXNDC17,HAAO,DDX19B,HGD,PACSIN3,HMGN2,PFKP,TERF2IP,UCHL1,CRYM,KIAA1191,SBDS,MRTO4,GPA33
Pubmed	1712897	Ribosomal protein genes are overexpressed in colorectal cancer: isolation of a cDNA clone encoding the human S3 ribosomal protein.	Pubmed	7.403e-09	0.0005048	1.803e-05	0.0002111	5	5	RPS3,RPS6,RPS8,RPS12,RPL5
Pubmed	8706699	Characterization of the human small-ribosomal-subunit proteins by N-terminal and internal sequencing, and mass spectrometry.	Pubmed	7.405e-09	0.0005049	1.803e-05	0.0002111	10	36	RPS3,RPS6,RPS8,RPS10,RPS12,RPS18,RPS27A,FAU,HBA1,HBA2
Pubmed	21145461	Dynamics of cullin-RING ubiquitin ligase network revealed by systematic quantitative proteomics.	Pubmed	8.797e-09	0.0005998	2.068e-05	0.0002421	79	1696	RPL27A,MAP4,RPS3,USP11,RPS6,MRPL37,ACTA1,RPS8,RPS10,RPS12,RPS18,FAU,H2BC21,H4C8,RPL22L1,SLC25A5,SLC25A6,MRPS18B,SHLD1,C7orf50,SEC31A,LYAR,TARS2,PABPC1,VIPAS39,SMARCE1,EIF3I,ATP1A4,UNC80,NACA,NAP1L1,BBS4,CCDC168,NDUFA4,STAU1,RPL10A,SOCS2,SUPT5H,POLL,MLLT11,EBNA1BP2,NPM1,ELOB,GYS1,PCBD1,PCBP2,TPM3,DDX19B,PDHB,PPP1R15A,PFKP,PFN1,TUBA4A,TUFM,C16orf89,AP2M1,MYOZ1,MYL6B,PEX16,QPCT,SDF2L1,PYCR2,SLC25A23…
Pubmed	17062627	Mutagenesis of diploid mammalian genes by gene entrapment.	Pubmed	1.37e-08	0.0009342	3.114e-05	0.0003646	16	115	MDK,PTRHD1,EFHD1,UQCRQ,BANF1,NANOS3,PRAF2,PFDN1,UQCR10,UBB,TOMM7,FAAP20,NEURL2,C1orf56,SMIM8,UCMA
Pubmed	27976729	Interactomic analysis of REST/NRSF and implications of its functional links with the transcription suppressor TRIM28 during neuronal differentiation.	Pubmed	2.149e-08	0.001466	4.728e-05	0.0005535	21	205	RPL27A,RPS3,RPS6,RPS8,RPS10,RPS18,H2AC6,FAU,SLC25A5,LYAR,PABPC1,SNRPN,RPL10A,NPM1,CYSRT1,COL22A1,TUFM,POLR2E,LCN12,RBM3,RPL5
Pubmed	28378742	Fancd2 in vivo interaction network reveals a non-canonical role in mitochondrial function.	Pubmed	2.312e-08	0.001577	4.927e-05	0.0005768	73	1553	RPL27A,COPZ2,RPS3,RPS6,ACTA1,RPS8,RPS10,RPS12,RPS18,RRAS,ALDH3B1,SLC25A5,SGCG,CHCHD6,SEC31A,APOE,PABPC1,ARL2,PELP1,SLC25A45,ATP5ME,NES,ATP5PO,NAP1L1,NARS1,NDUFA4,DPM1,RPL10A,DNAAF3,SUPT5H,EBNA1BP2,NME1,NPM1,ELOB,RBPMS,CBLN1,THY1,MAEL,NUP188,PRAF2,PCBP2,TPM3,DDAH2,PDHB,HMGCL,PFKP,PFN1,TUFM,CLU,CLIC1,MYL6B,CLNS1A,TSEN34,HSPA2,ZFPL1,CRYAB,ISG15,MRPL40,DCAF8,CYP11A1,DES,RAB7A,DLD,HSPB8,SAE1,NUBP2,TRA…
Pubmed	30463901	BAP1 regulation of the key adaptor protein NCoR1 is critical for ?-globin gene repression.	Pubmed	2.433e-08	0.001659	5.026e-05	0.0005884	65	1318	RPL27A,MAP4,RPS3,RPS6,RPS8,RPS12,RPS18,RPS27A,NPM3,S100A6,FAU,RPL22L1,SLC25A5,SLC25A6,LLPH,LYAR,PABPC1,ATP5MG,ARL2,UQCRQ,ALDH4A1,EIF3I,FSCN1,NACA,NAP1L1,NARS1,NDUFA4,NDUFA9,NDUFA10,DPM1,BANF1,RPL10A,NSFL1C,EBNA1BP2,TAF10,NPM1,ELOB,OXA1L,POLR1E,GYS1,HBA1,HBB,PCBP2,PCCB,TPM3,PDHB,HMGN2,PFN1,UQCR10,TUBA4A,TUFM,AP2M1,FADS2,POLR2E,TOMM22,DLD,KIF22,DRG2,DVL3,SAE1,NUBP2,TSFM,TRAP1,MRTO4,RPL5
Pubmed	24625528	Interactome analysis of AMP-activated protein kinase (AMPK)-?1 and -?1 in INS-1 pancreatic beta-cells by affinity purification-mass spectrometry.	Pubmed	2.69e-08	0.001834	5.394e-05	0.0006315	15	105	RPS3,ACTA1,RPS8,RPS10,RPS18,H2BC21,SLC25A5,PABPC1,EIF3I,RPL10A,NPM1,PCBP2,TPM1,TPM3,TUBA4A
Pubmed	23824909	Bcl2-associated athanogene 3 interactome analysis reveals a new role in modulating proteasome activity.	Pubmed	2.856e-08	0.001947	5.563e-05	0.0006513	29	374	MAP4,RPS12,S100A1,ALDH3B1,SORBS2,SLC25A5,MACROD1,PABPC1,RASL11B,ST6GALNAC4,TRAPPC2L,NAP1L1,NDP,SQSTM1,PPIL3,CA3,HAAO,HSF1,HSPA2,ISG15,HSPB6,CSTB,PSMD8,RAB7A,SPAG16,SAE1,STMN1,NUBP2,LSP1
Pubmed	16341674	Transcriptome analysis of human gastric cancer.	Pubmed	3.36e-08	0.002291	6.364e-05	0.0007451	45	770	RPS3,MDK,NPM3,S100A13,GPNMB,PSMG4,C7orf50,DNPH1,MT2A,CCDC59,ALDH4A1,EIF3I,LOC101927974,TMEM126B,FRS3,CCND1,C12orf57,FASTK,EBNA1BP2,OSGIN2,GNG5,ADAP1,C19orf48,DMC1,SH3D19,PCBP2,HMGB2,PFN1,DERL3,PEX16,CEBPZOS,MEAF6,C11orf1,TOMM7,SNHG18,SPATA20,PHF19,PSMB2,ZFAS1,DNAAF5,KCNC4,TXNL4B,RHNO1,SPRYD7,FARP1
Pubmed	27684187	Genetic and Proteomic Interrogation of Lower Confidence Candidate Genes Reveals Signaling Networks in ?-Catenin-Active Cancers.	Pubmed	3.869e-08	0.002638	7.13e-05	0.0008347	62	1247	RPL27A,MAP4,RPS3,RPS6,RPS8,RPS10,RPS12,RPS18,RPS27A,FAU,SLC25A5,SLC25A6,APOE,PABPC1,MT2A,EIF3I,NARS1,NDUFA10,DPM1,STAU1,RPL10A,NSFL1C,FASTK,SQSTM1,EBNA1BP2,NME1,GNG5,NPM1,ELOB,RUNX2,TEAD3,TGFB2,OXA1L,PCBD1,PCBP2,TPM1,TPM3,DDX19B,PDHB,U2AF1L4,HMGB2,PFDN1,PFKP,TUBA4A,TUFM,UBB,AP2M1,CLU,CLIC1,CLNS1A,POLR2E,PSMB2,DAD1,RAB7A,DLD,KLC1,KIF22,DVL3,SAE1,NPRL3,LEF1,RPL5
Pubmed	15031101	Analysis of genes from inner ear developmental-stage cDNA subtraction reveals molecular regionalization of the otic capsule.	Pubmed	5.044e-08	0.003439	9.05e-05	0.001059	9	33	MDK,TGFB2,HMGN2,CYTL1,CLU,COL9A1,LYPD1,RBM3,LUM
Pubmed	30562941	Proteomic Analysis of the Spinophilin Interactome in Rodent Striatum Following Psychostimulant Sensitization.	Pubmed	5.984e-08	0.00408	0.0001046	0.001225	29	387	GATD3A,MAP2,RPS8,ACTN2,AMPH,SLC25A5,DLGAP4,ATP5MG,OGDHL,SNCA,FSCN1,ATP5PO,NDUFA4,NDUFA9,NDUFA10,NCDN,NPM1,CAMK2B,THY1,PCBP2,PDHB,PFKP,AP2M1,UCHL1,HSPA2,COX5B,COX6C,CRYM,DLD
Pubmed	27626380	High-throughput discovery of novel developmental phenotypes.	Pubmed	6.265e-08	0.004272	0.0001068	0.00125	74	1623	LYPLAL1,MCAM,SKA2,MDK,NPM3,AFMID,S100A6,MFAP4,MGST3,CXCL9,COA5,GPNMB,ALDH3B1,IL31RA,SORBS2,NUDT14,P3H3,RAB20,RND3,ATP5MG,CDC26,DACT3,IAH1,NES,GATM,BBS4,SMOC2,NMRK2,DPM1,RAB24,FASTK,NKG7,ADGRL3,VXN,PKIG,GTF2B,P2RX6,MTURN,ARHGAP33,SEZ6L,SNAPIN,SDSL,MKRN2,PENK,GABARAPL2,CHN1,C16orf89,MYOZ1,CLU,HSF1,VEGFB,HJV,IFT22,PPDPF,GDF15,COX5B,COX7A1,ATF6B,ZFPL1,PPP2R2B,CRYM,IGFBP3,WTIP,FBXO44,PRKAB1,HACL1,MASP…
Pubmed	23246001	SGTA recognizes a noncanonical ubiquitin-like domain in the Bag6-Ubl4A-Trc35 complex to promote endoplasmic reticulum-associated degradation.	Pubmed	6.889e-08	0.004697	0.0001146	0.001341	22	239	RPL27A,RPS3,RPS6,ACTA1,RPS8,RPS10,RPS12,RPS18,RPS27A,SLC25A5,SLC25A6,RNF126,PABPC1,ATP5PO,NDUFA4,RPL10A,NPM1,PCBP2,TUFM,CLNS1A,HSPA2,RPL5
Pubmed	23533145	In-depth proteomic analyses of exosomes isolated from expressed prostatic secretions in urine.	Pubmed	7.903e-08	0.005389	0.0001283	0.001502	55	1070	ACTA1,ACTN2,RPS27A,H2AC6,H4C8,RHCG,APOE,DNPH1,PABPC1,AKR7A2,ARHGAP1,RNASET2,GATM,NARS1,BGN,PROM1,H2AW,NME1,GNB3,NPR3,TXNDC17,OMD,THBS4,THY1,HBA1,HBA2,HBB,PCBD1,PCBP2,HGD,DDAH2,DDAH1,PACSIN3,PFN1,PLA2G15,C16orf89,UBB,CLU,CLIC1,MYL6B,QPCT,GDF15,CRYAB,CRYM,TKFC,PRKACA,CSTB,PSMB2,DDT,DES,RAB7A,CRISPLD1,ACE2,LTBP2,LUM
Pubmed	15146197	Transcriptome characterization elucidates signaling networks that control human ES cell growth and differentiation.	Pubmed	8.145e-08	0.005554	0.0001292	0.001512	60	1215	SNAPC5,RPS27A,MDK,MAP3K3,AMZ2,PSMG4,SORBS2,DLGAP4,TMEM134,UQCC2,C7orf50,INPP5F,TARS2,AZIN1,ARL2,FAM228B,SHF,ZNF415,DOK5,LINC00702,OSCP1,EBNA1BP2,DDR1,RBPMS,RUNX2,CBLN1,TGFB3,PKIG,NUP188,TPM1,MGAT4B,CIART,PRPF40B,PEX16,TSEN34,GTF2H5,PRMT2,HSPA2,HOMER3,TRAPPC6A,C9orf16,ANAPC13,NUDT7,ARL16,FAAP20,FEZ1,MRPL40,RIPOR2,FBXL12,DELE1,IVD,RHOBTB1,C19orf54,MIR99AHG,SBDSP1,RAD9A,SAE1,KIAA1191,MRPL46,C5orf38
Pubmed	29229926	Cell cycle-dependent phosphorylation regulates RECQL4 pathway choice and ubiquitination in DNA double-strand break repair.	Pubmed	8.717e-08	0.005944	0.0001351	0.001582	64	1335	RPL27A,GATD3A,RPS3,USP11,RPS6,MRPL37,RPS8,RPS10,RPS12,RPS18,NPM3,FAU,TRAPPC4,SLC25A5,SLC25A6,GLRX3,MRPS18B,C7orf50,LYAR,TARS2,LMOD2,PABPC1,MYL12A,CXorf56,SMARCE1,EIF3I,NAP1L1,NDUFA4,NDUFA9,DPM1,LSM3,SMIM4,STAU1,RPL10A,SUPT5H,EBNA1BP2,NME1,NPM1,ELOB,TRIM41,GYS1,NUP188,PCBP2,PCCB,PDHB,PFN1,TERF2IP,TUFM,AP2S1,MYL6B,CLNS1A,PYCR2,HSPA2,IFT22,POLR2E,PRKACA,PSMB2,PSMD8,DLD,TRAP1,LRRC1,MRPL46,RPL5,RBFA
Pubmed	18973680	Microarray analysis of Foxa2 mutant mouse embryos reveals novel gene expression and inductive roles for the gastrula organizer and its derivatives.	Pubmed	9.007e-08	0.006141	0.0001365	0.001598	24	284	MDK,AMZ2,MFAP2,SCN2B,AMPH,SCG5,PABPC1,EFHD1,FRZB,RNASET2,GHITM,PROM1,RAB24,OSCP1,PKIG,MYL7,CTHRC1,CCDC28A,COX7B,IGFBP3,HTRA1,AGTRAP,RBM3,COQ4
Pubmed	21319273	An important role for CDK2 in G1 to S checkpoint activation and DNA damage response in human embryonic stem cells.	Pubmed	1.032e-07	0.007036	0.0001529	0.001791	29	397	RPL27A,RPS3,ACTA1,RPS8,RPS10,RPS12,RPS18,RPS27A,S100A6,H2BC21,ATP5MG,EIF3I,FSCN1,ATP5PO,NAP1L1,RPL10A,HBB,PCBP2,TPM3,HMGB2,HMGN2,PFN1,TUFM,CLIC1,UCHL1,DAD1,PSMD8,RBM3,STMN1
Pubmed	24457600	The central role of EED in the orchestration of polycomb group complexes.	Pubmed	1.148e-07	0.007827	0.0001665	0.00195	76	1710	DCAKD,RPL27A,RPS3,RPS6,RPS8,RPS10,RPS12,RPS18,RPS27A,NPM3,MGST3,RPL22L1,SORBS2,SLC25A5,ANP32B,C7orf50,SEC31A,LYAR,TARS2,PABPC1,ARHGAP1,ATP5MG,ARL2,PELP1,SMARCE1,UQCRQ,EIF3I,SNRPN,ATP5ME,ATP5PO,NAP1L1,NDUFA4,NDUFA9,NDUFA10,DPM1,STAU1,RPL10A,H2AW,SUPT5H,EBNA1BP2,NME1,NPM1,TRIM41,PDLIM1,POLR1E,TM7SF2,NUP188,PCBP2,TPM1,TPM3,PDHB,U2AF1L4,HMGB2,PFN1,UQCR10,TUFM,PHF1,UBB,AP2M1,AP2S1,CLIC1,MYL6B,SNX8,SDF…
Pubmed	30575818	Loss of ER retention motif of AGR2 can impact mTORC signaling and promote cancer metastasis.	Pubmed	1.291e-07	0.008804	0.0001834	0.002147	45	807	RPL27A,GATD3A,RPS3,RPS6,RPS8,RPS10,S100A6,SLC25A5,SLC25A6,GLRX3,ANP32B,MACROD1,LLPH,PABPC1,ARHGAP1,NT5C2,BRSK1,SNRPN,ATP6V1G2,MYL2,NDUFA4,NDUFA9,STAU1,RPL10A,NME1,HBB,PCBP2,PCCB,TPM3,HMGB2,PFKP,PFN1,UQCR10,TUFM,MRPL57,AP2M1,CLIC1,HSPA2,COX7A2,PRKACA,PSMB2,RAB7A,DLD,TRAP1,RPL5
Pubmed	23665500	Phosphoinositide-specific phospholipase C ? 1b (PI-PLC?1b) interactome: affinity purification-mass spectrometry analysis of PI-PLC?1b with nuclear protein.	Pubmed	1.441e-07	0.009825	0.0002005	0.002347	17	153	RPS10,NPM3,H2BC21,SLC25A5,ANP32B,LYAR,PELP1,EIF3I,NACA,NDUFA9,NME1,NPM1,PCBP2,TPM3,HMGB2,CHD5,TOMM22
Pubmed	26425749	Nuclear Gene-Encoded Leigh Syndrome Overview	Pubmed	1.495e-07	0.01019	0.0002039	0.002387	9	37	SCO1,UQCRQ,NDUFA2,NDUFA4,NDUFA9,NDUFA10,COX14,COX8A,DLD
Pubmed	26465331	Characterization of the Cardiac Overexpression of HSPB2 Reveals Mitochondrial and Myogenic Roles Supported by a Cardiac HspB2 Interactome.	Pubmed	1.672e-07	0.0114	0.0002235	0.002617	16	137	GATD3A,ACTA1,SLC25A5,ATP5MG,OGDHL,UQCRQ,ATP5ME,NACA,NARS1,BGN,COX7A2L,TNNI3,NDUFA11,CRYAB,RAB7A,DLD
Pubmed	11042152	Cloning and functional analysis of cDNAs with open reading frames for 300 previously undefined genes expressed in CD34+ hematopoietic stem/progenitor cells.	Pubmed	1.845e-07	0.01258	0.0002419	0.002832	25	317	MRPL37,TBC1D7,AMZ2,TRAPPC4,MRPS18B,ATP5MG,CCDC113,CCDC59,TMBIM4,MPC1,TRAPPC2L,C9orf78,NACA,NDUFA2,NDUFB1,NSFL1C,GNG5,TBCA,DDAH2,MKRN2,UQCR10,ATP5MPL,HACL1,SAE1,ORMDL3
Pubmed	17353931	Large-scale mapping of human protein-protein interactions by mass spectrometry.	Pubmed	2.396e-07	0.01634	0.0003083	0.003609	61	1284	USP11,PAK4,RPS10,EXT1,H2BC21,GLRX3,MRPS18B,LYAR,PABPC1,AZIN1,MYL12A,ATP5MG,CCDC59,EFHD1,TMBIM4,CXorf56,EIF3I,FSCN1,SNRPN,SAMD4A,NDUFA9,DPM1,SQSTM1,ACOT2,EBNA1BP2,NPM1,ELOB,NOL3,CAMK2B,ODC1,PKIG,POLR1E,ZNF277,GYS1,FIBP,NUP188,PCBD1,TPM3,DDX19B,PACSIN3,PFDN1,GABARAPL2,PFKP,TUFM,AP2S1,COX5B,ICA1,COX6C,PPP4C,ISG15,PRKAB1,PRKACA,CSTB,PSMD8,DDT,SMYD2,DNAAF5,RAB7A,KLC1,SAE1,BOLA1
Pubmed	30713523	Plasticity in the Glucagon Interactome Reveals Novel Proteins That Regulate Glucagon Secretion in ?-TC1-6 Cells.	Pubmed	2.443e-07	0.01666	0.0003085	0.003611	20	216	MAP2,ACTA1,RPS12,RPS27A,H2BC21,SLC25A5,PABPC1,NES,ATP5PO,H2AW,NME1,NPM1,GRIA3,PCBP2,HMGN2,PFN1,UBB,HSPA2,RAB7A,STMN1
Pubmed	27173435	An organelle-specific protein landscape identifies novel diseases and molecular mechanisms.	Pubmed	2.885e-07	0.01967	0.0003576	0.004187	62	1321	DCAKD,MNS1,PAK4,IFT43,MAP3K3,FAU,SCO1,TRAPPC4,C12orf45,PHLDB3,GLRX3,UQCC2,CHCHD6,RNF126,PACS1,ARL2,DACT3,B9D1,SH3RF3,TRAPPC2L,ATP5ME,ATP5PO,BBS4,NDUFA9,NDUFA10,SUPT5H,POLL,KIAA0556,ELOB,CAMK2B,TMED4,OXA1L,PDLIM1,GYS1,PDHB,VPS45,PFKP,TFPT,AP2M1,AP2S1,CBY1,MYL6B,SDF2L1,HSF1,IFT22,POLR2E,NDUFAF3,COX6C,PRKACA,PSMD8,SMYD2,GAB2,DNAAF5,TOMM22,CXCR4,TMEM231,SPAG16,KLC1,TSC22D3,DVL3,TRAP1,LUM
Pubmed	21516116	Next-generation sequencing to generate interactome datasets.	Pubmed	3.192e-07	0.02177	0.0003887	0.004551	56	1147	SNAPC5,TNIP1,S100A1,SLC25A6,SGCA,GLRX3,ANP32B,DNAJC30,LYAR,FAM214B,ARHGAP1,BEX3,ARL2,CDC26,SMARCE1,ATP5PO,PSENEN,NAP1L3,CCND1,ARID5A,LSM3,SQSTM1,NKG7,C19orf25,TCEA2,ELOB,RBPMS,TRIM41,PYROXD2,ZBTB47,ISCU,SYNGR2,TNNT1,PCBD1,ZBED1,TPM1,TPM3,SDSL,PPCDC,GABARAPL2,CHN1,PHF1,MRPL57,UBB,HOMER3,C9orf16,COX5B,MAP2K5,RIPOR2,DCAF8,SLC30A2,HSPB8,AGTRAP,RAD23A,PLXDC1,TMEM140
Pubmed	12588972	Transcript-selective translational silencing by gamma interferon is directed by a novel structural element in the ceruloplasmin mRNA 3' untranslated region.	Pubmed	3.953e-07	0.02696	0.0004651	0.005445	10	53	RPS3,RPS6,RPS8,RPS10,RPS12,RPS18,RPS27A,FAU,PABPC1,EIF3I
Pubmed	27545878	SPATA2-Mediated Binding of CYLD to HOIP Enables CYLD Recruitment to Signaling Complexes.	Pubmed	3.978e-07	0.02712	0.0004651	0.005445	26	353	RPS3,RPS6,RPS8,RPS10,RPS12,TNIP1,RPS18,S100A6,SLC25A5,SLC25A6,PABPC1,MYL12A,NDUFA4,BANF1,RPL10A,SQSTM1,NPM1,TPM1,TPM3,TUBA4A,TUFM,AP2S1,MYL6B,PNKD,LTBP1,RPL5
Pubmed	27068509	Extracellular matrix remodelling in response to venous hypertension: proteomics of human varicose veins.	Pubmed	4.029e-07	0.02747	0.0004651	0.005445	16	146	MCAM,S100A6,S100A13,MFAP4,AEBP1,FMOD,APOE,BGN,CLU,CTHRC1,COL16A1,HTRA1,ASPN,LTBP1,LTBP2,LUM
Pubmed	29128334	A Map of Human Mitochondrial Protein Interactions Linked to Neurodegeneration Reveals New Mechanisms of Redox Homeostasis and NF-?B Signaling.	Pubmed	4.093e-07	0.02791	0.0004651	0.005445	43	786	GATD3A,SLC25A5,SLC25A6,MRPS18B,MACROD1,PABPC1,MYL12A,SMARCE1,EIF3I,FSCN1,ATP5PO,KIF1A,NACA,NAP1L1,NDUFA4,NDUFA10,BANF1,RPL10A,SQSTM1,NME1,TBCA,TMED4,HBA1,HBA2,HBB,TPM1,TPM3,PDHB,PFN1,UCHL1,PDCL3,PYCR2,POLR2E,COX7A2,DES,TOMM22,RAB7A,DLD,AGTRAP,SAE1,STMN1,TSFM,TRAP1
Pubmed	15883184	Mass spectrometric analysis of the human 40S ribosomal subunit: native and HCV IRES-bound complexes.	Pubmed	4.532e-07	0.0309	0.0005022	0.00588	8	31	RPS3,RPS6,RPS8,RPS10,RPS12,RPS18,RPS27A,FAU
Pubmed	9582194	A map of 75 human ribosomal protein genes.	Pubmed	4.567e-07	0.03114	0.0005022	0.00588	11	67	RPL27A,RPS3,RPS6,RPS8,RPS10,RPS12,RPS18,RPS27A,FAU,RPL10A,RPL5
Pubmed	28927264	Comparative Interactomes of VRK1 and VRK3 with Their Distinct Roles in the Cell Cycle of Liver Cancer.	Pubmed	4.778e-07	0.03258	0.0005171	0.006054	19	205	RPL27A,RPS3,RPS6,ACTA1,RPS8,RPS10,RPS18,RPS27A,H2AC6,FAU,H2BC21,SLC25A6,SNRPN,NAP1L1,BANF1,RPL10A,NPM1,CLNS1A,RPL5
Pubmed	11125038	Database resources of the National Center for Biotechnology Information.	Pubmed	4.884e-07	0.0333	0.0005204	0.006092	70	1587	MNS1,LYPLAL1,TBC1D7,SYNPO2L,SNAPC5,IFT43,NPM3,CXCL9,C1QTNF3,KLHDC8B,FOXS1,SFRP4,YIPF4,PLEKHA4,MACROD1,UQCC2,TARS2,RNF126,ZNF414,ZNF365,SLC1A7,FAM214B,ARHGAP1,CHFR,TRAK2,ARRDC2,SAMD4A,GADD45B,KIF1A,JAGN1,NAP1L3,NDUFA2,C12orf57,NCDN,PRRT3,C9orf24,NKG7,ADAP1,PKIG,RPUSD4,SH3D19,MAEL,FRMD3,UBL7,SDSL,CHN1,ZNF688,BOD1,ITGBL1,PRPF40B,SNX8,TSEN34,TSACC,TRAPPC6A,C9orf16,LETMD1,IFT22,LENG1,CLIP3,ARHGAP24,LR…
Pubmed	24194600	The International Mouse Phenotyping Consortium Web Portal, a unified point of access for knockout mice and related phenotyping data.	Pubmed	5.082e-07	0.03465	0.0005331	0.006241	52	1047	RIN3,LYPLAL1,MCAM,SKA2,MDK,AFMID,S100A6,GPNMB,IL31RA,SORBS2,NUDT14,P3H3,RAB20,FSCN1,NES,BBS4,SMOC2,C12orf57,RAB24,FASTK,NKG7,DOK7,ODC1,TGFB3,MTURN,ARHGAP33,SNAPIN,PENK,HMGN2,GABARAPL2,CHN1,YPEL1,C16orf89,HSF1,ANAPC13,VEGFB,HJV,IFT22,COX5B,ATF6B,ZFPL1,CRYM,IGFBP3,PRKAB1,HACL1,TMEM30B,MASP1,PHF19,ITGAE,IVD,RAD9A,LUM
Pubmed	22145905	A cohesin-RAD21 interactome.	Pubmed	5.971e-07	0.04071	0.0006168	0.007221	19	208	RPS3,RPS6,RPS10,RPS18,RPS27A,H4C8,RPL22L1,MSRB2,EIF3I,NACA,NAP1L1,TPM3,PPP1R15A,CLU,CSTB,DAPK3,HSD17B8,TRAP1,RPL5
Pubmed	24952961	A high-resolution spatiotemporal atlas of gene expression of the developing mouse brain.	Pubmed	6.105e-07	0.04162	0.0006213	0.007273	78	1849	MAP2,MBP,ETV4,MFAP4,MGST3,FGF1,FOXS1,SFRP4,SCG5,KLF15,VAT1L,APOE,FRZB,SMARCE1,ALDH4A1,SNCA,GABRE,NES,ADAM19,LAYN,PSENEN,BCL2,SMOC2,MSTN,PROM1,PER2,GLRB,KCNMB4,CA3,DDR1,CUX2,GRIA3,GRID1,RUNX2,TEAD3,GRM1,TGFB2,TGFB3,LEFTY2,PDLIM1,HEY1,MAEL,TNNT1,PCBD1,NXPH4,TPD52L1,GDF6,PENK,HMGN2,ITGBL1,SEMA5B,CLU,HSF1,VEGFB,COL9A1,LETMD1,COL16A1,GDF15,IRX6,IRX1,NRIP3,ATF6B,CRYM,IGFBP3,FEZ1,PRKACA,CCN2,DBP,LYPD1,C…
Pubmed	27591049	SPATA2 Links CYLD to LUBAC, Activates CYLD, and Controls LUBAC Signaling.	Pubmed	6.485e-07	0.04422	0.0006503	0.007613	34	559	RPL27A,RPS3,RPS6,MRPL37,RPS8,RPS10,RPS12,RPS18,RPS27A,ATAT1,FAU,SLC25A5,SLC25A6,C7orf50,PABPC1,MYL12A,EIF3I,ATP1A4,SNRPN,NAP1L1,STAU1,RPL10A,MLLT11,NPM1,HBB,PCBP2,TUBA4A,UBBP4,TUFM,CLNS1A,DNAJB2,PSMB2,MRPL46,RPL5
Pubmed	24006456	Extracellular matrix secretion by cardiac fibroblasts: role of microRNA-29b and microRNA-30c.	Pubmed	6.669e-07	0.04547	0.000659	0.007715	20	230	MFAP4,AEBP1,FMOD,FRZB,BGN,TGFB2,GDF6,PFN1,PLA2G15,ITGBL1,SERPINE2,CLU,CTHRC1,ATF6B,IGFBP3,CCN2,HTRA1,LTBP1,LTBP2,LUM
Pubmed	16710414	The DNA sequence and biological annotation of human chromosome 1.	Pubmed	7.36e-07	0.05018	0.0007169	0.008392	51	1031	LYPLAL1,MRPL37,IER5,EXTL1,S100A1,S100A6,S100A13,MFAP2,H2BC21,MGST3,TARS2,AKR7A2,ALDH4A1,ATP1A4,RRAGC,H2AW,PER3,C1orf122,MLLT11,GNG5,NPPA,GTF2B,C1orf198,MAEL,TPM3,DHRS3,CIART,HMGN2,TNFRSF4,BMP8A,PYCR2,TSACC,MEAF6,COL16A1,SYF2,FBXO44,CHD5,PSMB2,IRF6,SMYD2,KCNC4,MFN2,AGTRAP,C1orf54,BOLA1,STMN1,PPCS,TTLL7,EFNA1,MRTO4,RPL5
Pubmed	25910212	Widespread macromolecular interaction perturbations in human genetic disorders.	Pubmed	7.625e-07	0.05199	0.0007322	0.008572	35	589	MIF4GD,TNIP1,ACTN2,H4C8,SORBS2,SGCA,GLRX3,CCND1,DPM1,BANF1,SULT1A1,FASTK,SQSTM1,NME1,RBPMS,TRIM41,DMC1,TNNI3,TNNT1,ZBED1,UBL7,TPM1,TPM3,CHN1,TUFM,TFPT,HOMER3,NDUFAF3,PNKD,CRYAB,SLC30A2,AGTRAP,DVL3,TSFM,HSD17B14
Pubmed	19322201	Ubiquitin-mediated proteolysis of HuR by heat shock.	Pubmed	7.874e-07	0.05369	0.0007456	0.008729	72	1671	DCAKD,AFMID,MGST3,FGD1,SETD9,SLC27A6,PHLDA1,ANP32B,TMEM134,R3HDM2,PABPC1,AZIN1,MSRB2,TRAK2,IFI6,NAP1L1,FRS3,CCND1,FAM120AOS,TSPAN9,STAU1,PER2,PPIL3,OSGIN2,TMED4,TGFB3,C1orf198,SLC16A5,HEY1,SH3D19,COX7A2L,MTURN,PCBP2,TPM1,TPM3,DDAH1,DHRS3,U2AF1L4,HMGB2,GABARAPL2,PFN1,PHF1,SERPINE2,PDCL3,SLC25A23,MEAF6,CCDC28A,FAAP20,IRX1,NRIP3,PPP4C,ADAMTSL5,ZCRB1,TJAP1,CCN2,TOMM22,TXNL4B,DIO2,RAB7A,TMCO3,RHNO1,TS…
Pubmed	24189400	Perturbation of the mutated EGFR interactome identifies vulnerabilities and resistance mechanisms.	Pubmed	9.192e-07	0.06267	0.0008585	0.01005	21	256	RPS3,ACTA1,RPS27A,MEA1,SLC25A5,SLC25A6,PHLDA1,MRPS18B,MYL12A,NDUFA4,SQSTM1,GNB3,DDR1,HBA1,HBB,TUBA4A,TUFM,AP2M1,AP2S1,DNAJB2,MASP1
Pubmed	15345747	Phosphoproteomic analysis of the developing mouse brain.	Pubmed	9.356e-07	0.06379	0.000862	0.01009	20	235	MAP2,MAP4,PAK4,RPS10,RPL22L1,AMPH,DLGAP4,VIPAS39,PELP1,NES,NACA,NAP1L1,SQSTM1,TUBA4A,TERF2IP,CLNS1A,XPA,FEZ1,PRKACA,CCDC25
Pubmed	25147182	Quantitative Lys-?-Gly-Gly (diGly) proteomics coupled with inducible RNAi reveals ubiquitin-mediated proteolysis of DNA damage-inducible transcript 4 (DDIT4) by the E3 ligase HUWE1.	Pubmed	9.783e-07	0.0667	0.0008894	0.01041	27	394	RPL27A,RPS3,RPS8,RPS10,RPS18,H2BC21,SLC25A5,SLC25A6,ANP32B,EIF3I,NACA,NAP1L1,NARS1,DPM1,RPL10A,NPM1,PCBP2,PCCB,PDHB,TUFM,UBB,MYL6B,PSMB2,PSMD8,DLD,STMN1,RPL5
Pubmed	15226823	Genomic analysis of mouse retinal development.	Pubmed	1.062e-06	0.07239	0.0009525	0.01115	48	957	MAP2,ATAT1,ARRDC3,SLC25A5,SCG5,YIPF4,SLC1A7,VIPAS39,MTLN,MPC1,TRAK2,NES,CPLX1,CCND1,RAB24,C1orf122,KIAA0556,GNG5,SLC38A3,CTXN1,DDR1,RBPMS,THY1,WDR66,DDAH1,HMGB2,HMGN2,COL22A1,ZNF688,DUSP26,CLU,LETMD1,COL16A1,CLIP3,CRYM,PPP4C,HSPB6,PRKAB1,PPIP5K1,TRNP1,LRRC49,DBP,PTPRR,DIO2,WIPI1,HIGD2A,STMN1,MAB21L1
Pubmed	19794400	Intact lipid rafts regulate HIV-1 Tat protein-induced activation of the Rho signaling and upregulation of P-glycoprotein in brain endothelial cells.	Pubmed	1.109e-06	0.07559	0.0009816	0.01149	6	16	MYL9,MYL12A,MYL2,MYL5,MYL7,MYL6B
Pubmed	23398456	The P-body component USP52/PAN2 is a novel regulator of HIF1A mRNA stability.	Pubmed	1.236e-06	0.08428	0.00108	0.01265	24	328	RPL27A,RPS3,RPS6,RPS8,RPS10,RPS12,RPS18,RPS27A,PABPC1,EFHD1,EIF3I,RPL10A,SQSTM1,NPM1,HBA1,HBB,TPM1,TPM3,PACSIN3,TUFM,MYL6B,CLNS1A,STMN1,RPL5
Pubmed	9752724	Structural organization and transcription regulation of nuclear genes encoding the mammalian cytochrome c oxidase complex.	Pubmed	1.509e-06	0.1029	0.001303	0.01525	4	5	COX6C,COX7A1,COX7A2,COX7B
Pubmed	20360068	Systematic analysis of human protein complexes identifies chromosome segregation proteins.	Pubmed	1.554e-06	0.1059	0.001324	0.0155	54	1147	LYPLAL1,FAU,MGST3,MRPS18B,YIPF4,LLPH,CHCHD6,SHLD1,PABPC1,PACS1,ARL2,CDC26,SMARCE1,EIF3I,FSCN1,MYBL1,C9orf78,NACA,GATM,NCDN,PER3,PER2,SQSTM1,MTCL1,EBNA1BP2,C19orf25,TMED4,ORC5,SH3D19,NUP188,PCBP2,EDA2R,TPM1,SNAPIN,PACSIN3,PFDN1,PFDN4,PFN1,AP2M1,CLU,PDCL3,TSEN34,HSF1,HOMER3,ANAPC13,SYF2,PNKD,NRIP3,ITPRIP,DCAF8,URB1,MAFK,TRAP1,MRTO4
Pubmed	22419111	HIV-1 Tat protein directly induces mitochondrial membrane permeabilization and inactivates cytochrome c oxidase.	Pubmed	1.679e-06	0.1145	0.001413	0.01655	6	17	COX5B,COX6C,COX7A1,COX7A2,COX7B,COX8A
Pubmed	11238910	Cardiomyopathy in Irx4-deficient mice is preceded by abnormal ventricular gene expression.	Pubmed	1.766e-06	0.1204	0.001468	0.01719	7	26	ACTA1,MYL2,NPPA,RBPMS,MYL7,IRX1,IRX2
Pubmed	9811942	Genome-wide mapping of unselected transcripts from extraembryonic tissue of 7.5-day mouse embryos reveals enrichment in the t-complex and under-representation on the X chromosome.	Pubmed	2.376e-06	0.162	0.001952	0.02285	19	228	RPS6,RPS18,C12orf45,PABPC1,BEX3,MT2A,ATP5PO,GLRX,GNB3,NPM1,TPM3,UBB,GTF2H5,PSMB2,RAB7A,AGTRAP,TSPAN32,NUBP2,RPL5
Pubmed	8722009	Structure and evolution of mammalian ribosomal proteins.	Pubmed	2.819e-06	0.1922	0.002288	0.02679	11	80	RPL27A,RPS3,RPS6,RPS8,RPS10,RPS12,RPS18,RPS27A,FAU,RPL10A,RPL5
Pubmed	23463506	The intracellular interactome of tetraspanin-enriched microdomains reveals their function as sorting machineries toward exosomes.	Pubmed	3.341e-06	0.2278	0.00268	0.03137	18	212	RPL27A,RPS3,RPS6,RPS8,RPS18,ACTN2,FAU,ANP32B,PABPC1,EIF3I,ATP5PO,LSM3,NPM1,PCBP2,PFKP,TUBA4A,TUFM,RPL5
Pubmed	11256614	Systematic subcellular localization of novel proteins identified by large-scale cDNA sequencing.	Pubmed	3.39e-06	0.2311	0.002688	0.03147	31	523	MAP3K3,TADA3,YIPF4,LYAR,FAM214B,ATP5MG,CCDC113,GHITM,SMARCE1,CCND1,MOAP1,BGN,SLC38A3,NPR3,DEPP1,THY1,ISCU,DDX19B,GABARAPL2,AGBL5,NDUFAF3,SYF2,PNKD,CRYAB,ARHGAP24,GADD45A,HSPB8,RENBP,STMN1,COQ4,TMEM143
Pubmed	12865426	Proteomic analysis of the mouse liver mitochondrial inner membrane.	Pubmed	3.763e-06	0.2566	0.002949	0.03453	15	153	SLC25A5,ATP5MG,MPC1,UQCRQ,NDUFA4,NDUFA9,UQCR11,OXA1L,HMGCL,UQCR10,TUFM,COX5B,COX6C,COX7A2,TOMM22
Pubmed	21905118	Inhibition of ?-synuclein aggregation by small heat shock proteins.	Pubmed	4.443e-06	0.3029	0.003366	0.0394	4	6	SNCA,CRYAB,HSPB6,HSPB8
Pubmed	11830573	Elevated transforming growth factor beta2 enhances apoptosis and contributes to abnormal outflow tract and aortic sac development in retinoic X receptor alpha knockout embryos.	Pubmed	4.443e-06	0.3029	0.003366	0.0394	4	6	MYL2,TGFB2,TGFB3,MYL7
Pubmed	8093006	Interaction of the small interstitial proteoglycans biglycan, decorin and fibromodulin with transforming growth factor beta.	Pubmed	4.443e-06	0.3029	0.003366	0.0394	4	6	FMOD,BGN,TGFB2,TGFB3
Pubmed	20551380	Proteomics characterization of extracellular space components in the human aorta.	Pubmed	4.813e-06	0.3282	0.003606	0.04222	12	101	MFAP4,AEBP1,FMOD,APOE,FRZB,BGN,CLU,HTRA1,ASPN,LTBP1,LTBP2,LUM
Pubmed	20881960	Hundreds of variants clustered in genomic loci and biological pathways affect human height.	Pubmed	5.344e-06	0.3644	0.00396	0.04636	17	198	LYPLAL1,VGLL2,MIR3936HG,MFAP2,LOC101928731,SOCS2,MICA,NPR3,TGFB2,PCCB,BOD1,SERPINE2,JMJD4,ZFAS1,LTBP1,LTBP2,RPL5
Pubmed	19056867	Large-scale proteomics and phosphoproteomics of urinary exosomes.	Pubmed	5.525e-06	0.3767	0.004051	0.04742	48	1017	RPS18,RRAS,S100A6,ALDH3B1,RHCG,APOE,DNPH1,AKR7A2,ARHGAP1,GHITM,NARS1,BGN,PROM1,BPI,SQSTM1,GNG5,CUX2,GRID1,TXNDC17,CLIC6,THY1,HBB,PCBD1,CYSRT1,DDX19B,HGD,DDAH2,DDAH1,SLC26A4,PACSIN3,PFN1,C16orf89,DUSP26,AP2M1,CLU,CLIC1,HSPA2,CRYAB,CRYM,TKFC,CSTB,PSMB2,IRF6,DDT,RAB7A,GATD1,RENBP,ACE2
Pubmed	28327460	Comprehensive proteomic characterization of stem cell-derived extracellular matrices.	Pubmed	5.79e-06	0.3948	0.0042	0.04917	11	86	MDK,MFAP2,AEBP1,BGN,SERPINE2,COL16A1,GDF15,CCN2,HTRA1,LTBP1,LTBP2
Pubmed	17634366	Proteolipid protein is required for transport of sirtuin 2 into CNS myelin.	Pubmed	6.046e-06	0.4122	0.004339	0.0508	15	159	MBP,RPS27A,SLC25A5,FSCN1,ATP5PO,NDUFA10,NME1,THY1,TUFM,UBB,UCHL1,HSPA2,COX5B,CRYAB,DLD
Pubmed	16196087	Large-scale analysis of the human ubiquitin-related proteome.	Pubmed	6.454e-06	0.4401	0.004561	0.05339	22	313	DCAKD,RPS8,RPS12,MRPS18B,CHCHD6,RNF126,CYB5R1,ATP5PO,NACA,NAP1L1,NARS1,NCDN,NPM1,PCBP2,TUFM,COX5B,PSMB2,PSMD8,TSC22D3,RBM3,SPRYD7,TRAP1
Pubmed	15189156	The molecular mechanics of eukaryotic translation.	Pubmed	6.488e-06	0.4424	0.004561	0.05339	11	87	RPL27A,RPS3,RPS6,RPS8,RPS10,RPS12,RPS18,RPS27A,FAU,RPL10A,RPL5
Pubmed	24711643	Identifying biological pathways that underlie primordial short stature using network analysis.	Pubmed	6.619e-06	0.4513	0.004605	0.05391	48	1024	RPL27A,MAP4,RPS3,RPS6,ACTA1,RPS8,RPS10,RPS18,MFAP2,H2BC21,H4C8,SLC25A5,SLC25A6,PABPC1,PELP1,NES,ATP5PO,NACA,NAP1L1,NCDN,STAU1,RPL10A,SUPT5H,SQSTM1,EBNA1BP2,NPM1,GRK6,PDLIM1,NUP188,HBA1,HBA2,PCBP2,TPM3,PACSIN3,PFKP,PFN1,TUBA4A,TUFM,CLIC1,UCHL1,MYL6B,POLR2E,URB1,RAB7A,KIF22,TRAP1,MRTO4,RPL5
Pubmed	21630459	Proteomic characterization of the human sperm nucleus.	Pubmed	6.766e-06	0.4613	0.00463	0.0542	27	437	RPS6,RPS8,RPS18,RPS27A,H2AC6,H2BC21,H4C8,SLC25A5,SLC25A6,APOE,ATP5PO,NDUFA9,DPM1,BANF1,RPL10A,C9orf24,NME1,NPM1,CENPA,PDHB,PFKP,UBB,HSPA2,TKFC,PRKACA,PSMB2,PSMD8
Pubmed	21289070	DOT1L regulates dystrophin expression and is critical for cardiac function.	Pubmed	6.791e-06	0.463	0.00463	0.0542	6	21	ACTA1,ACTN2,SGCA,SGCG,NPPA,DES
Pubmed	30209976	PTPN14 regulates Roquin2 stability by tyrosine dephosphorylation.	Pubmed	6.858e-06	0.4676	0.00463	0.0542	36	678	RPL27A,RPS3,RPS6,ACTA1,RPS8,RPS10,RPS12,RPS18,RPS27A,FAU,RPL22L1,SLC25A5,SLC25A6,MRPS18B,SLU7,LYAR,SNRPN,NACA,NAP1L1,NDUFA9,DPM1,LSM3,RPL10A,EBNA1BP2,NPM1,ELOB,POLR1E,PCBP2,PFDN4,TUBA4A,CLNS1A,HSPA2,RBM3,MRTO4,MRPL46,RPL5
Pubmed	12777385	Proteomic analysis of human Nop56p-associated pre-ribosomal ribonucleoprotein complexes. Possible link between Nop56p and the nucleolar protein treacle responsible for Treacher Collins syndrome.	Pubmed	7.26e-06	0.495	0.004853	0.05682	10	72	RPL27A,RPS8,SLC25A5,LYAR,NAP1L1,RPL10A,EBNA1BP2,NPM1,TUFM,RPL5
Pubmed	11076863	DNA cloning using in vitro site-specific recombination.	Pubmed	7.5e-06	0.5114	0.004965	0.05813	40	794	MORN4,PAK4,MAP3K3,TADA3,SORBS2,YIPF4,LYAR,FAM214B,ATP5MG,CCDC113,CSPG5,GHITM,CCND1,NDP,HCN2,MOAP1,BGN,PROM1,PER2,SLC38A3,CAMK2B,DEPP1,GRM1,TMED4,THY1,HBB,PDHB,GABARAPL2,ICA1,PNKD,CRYAB,IGSF1,ABHD11,MAP3K7CL,GADD45A,HSD17B8,C1orf54,STMN1,COQ4,FARP1
Pubmed	25621764	Translation of 5' leaders is pervasive in genes resistant to eIF2 repression.	Pubmed	7.942e-06	0.5415	0.005207	0.06096	5	13	AZIN1,C19orf48,PCNX4,PPP1R15A,UCP2
Pubmed	6188845	Immunochemical accessibility of ribosomal protein S4 in the 30 S ribosome. The interaction of S4 with S5 and S12.	Pubmed	9.151e-06	0.6239	0.005942	0.06957	6	22	RPS3,RPS6,RPS8,RPS10,RPS12,RPS18
Pubmed	7821789	Construction of a human full-length cDNA bank.	Pubmed	9.688e-06	0.6605	0.006232	0.07295	12	108	RPS3,RPS12,S100A6,FAU,MT2A,NAP1L1,NME1,NPM1,ODC1,PFN1,CXCR4,STMN1
Pubmed	27333774	Sphingosine 1-phosphate receptor-1 in cardiomyocytes is required for normal cardiac development.	Pubmed	1.017e-05	0.6935	0.006422	0.07518	4	7	ACTN2,NPPA,MYL7,S1PR1
Pubmed	10930463	Specific sequence motif of 8-Cys repeats of TGF-beta binding proteins, LTBPs, creates a hydrophobic interaction surface for binding of small latent TGF-beta.	Pubmed	1.017e-05	0.6935	0.006422	0.07518	4	7	TGFB2,TGFB3,LTBP1,LTBP2
Pubmed	16944949	Identification of 14-3-3epsilon substrates from embryonic murine brain.	Pubmed	1.222e-05	0.833	0.006721	0.07868	13	129	RPS3,TBC1D7,ATAT1,SORBS2,SLC25A5,R3HDM2,PACS1,MARK4,BRSK1,DCLK2,ARHGAP33,HOMER3,GAB2
Pubmed	26972000	Substrate-Trapped Interactors of PHD3 and FIH Cluster in Distinct Signaling Pathways.	Pubmed	1.23e-05	0.8386	0.006721	0.07868	63	1517	USP11,TCEAL4,MRPL37,RPS27A,SCO1,PHLDB3,SLC25A5,SLC25A6,GLRX3,SHB,TARS2,RNF126,UQCRQ,JAGN1,TMEM126B,NACA,NAP1L1,NDUFA4,C12orf57,NDUFA9,NDUFA10,DPM1,NCDN,YIF1A,SQSTM1,MLLT11,MTCL1,ELOB,OXA1L,NUP188,PRAF2,SNAPIN,PDHB,VPS45,HMGN2,PFDN1,UQCR10,TUFM,AP2S1,SDF2L1,IFT22,POLR2E,NDUFAF3,COX7A2,PNKD,ZFPL1,NDUFA11,TJAP1,DCAF8,PSMB2,FBXL12,PSMD8,TOMM22,MFN2,KLC1,HIGD2A,DVL3,SAE1,NKIRAS2,NUBP2,FARP1,LRRC1,LEF1
Pubmed	21703224	T-quaternary structure of oxy human adult hemoglobin in the presence of two allosteric effectors, L35 and IHP.	Pubmed	1.341e-05	0.9141	0.006721	0.07868	3	3	HBA1,HBA2,HBB
Pubmed	21843656	Gadd45a, Gadd45b and Gadd45g expression during mouse embryonic development.	Pubmed	1.341e-05	0.9141	0.006721	0.07868	3	3	GADD45B,GADD45G,GADD45A
Pubmed	24074341	Comparative haematological parameters of HbAA and HbAS genotype children infected with Plasmodium falciparum malaria in Yemen.	Pubmed	1.341e-05	0.9141	0.006721	0.07868	3	3	HBA1,HBA2,HBB
Pubmed	24635037	Capturing the hemoglobin allosteric transition in a single crystal form.	Pubmed	1.341e-05	0.9141	0.006721	0.07868	3	3	HBA1,HBA2,HBB
Pubmed	1115799	Two new hemoglobins. Hemoglobin Alabama (beta39(C5)Gln leads to Lys) and hemoglobin Montgomery (alpha 48(CD 6) Leu leads to Arg).	Pubmed	1.341e-05	0.9141	0.006721	0.07868	3	3	HBA1,HBA2,HBB
Pubmed	11724557	Control of heme reactivity by diffusion: structural basis and functional characterization in hemoglobin mutants.	Pubmed	1.341e-05	0.9141	0.006721	0.07868	3	3	HBA1,HBA2,HBB
Pubmed	9830011	Crystal structure of deoxy-human hemoglobin beta6 Glu --> Trp. Implications for the structure and formation of the sickle cell fiber.	Pubmed	1.341e-05	0.9141	0.006721	0.07868	3	3	HBA1,HBA2,HBB
Pubmed	29186676	The Circadian Clock Regulates Adipogenesis by a Per3 Crosstalk Pathway to Klf15.	Pubmed	1.341e-05	0.9141	0.006721	0.07868	3	3	KLF15,PER3,PER2
Pubmed	6644819	Structure of human oxyhaemoglobin at 2.1 A resolution.	Pubmed	1.341e-05	0.9141	0.006721	0.07868	3	3	HBA1,HBA2,HBB
Pubmed	27377386	Visualizing the Bohr effect in hemoglobin: neutron structure of equine cyanomethemoglobin in the R state and comparison with human deoxyhemoglobin in the T state.	Pubmed	1.341e-05	0.9141	0.006721	0.07868	3	3	HBA1,HBA2,HBB
Pubmed	23349856	Characterization of adult ?- and ?-globin elevated by hydrogen peroxide in cervical cancer cells that play a cytoprotective role against oxidative insults.	Pubmed	1.341e-05	0.9141	0.006721	0.07868	3	3	HBA1,HBA2,HBB
Pubmed	10930828	Genetically crosslinked hemoglobin: a structural study.	Pubmed	1.341e-05	0.9141	0.006721	0.07868	3	3	HBA1,HBA2,HBB
Pubmed	9441940	The use of electron tomography for structural analysis of disordered protein arrays.	Pubmed	1.341e-05	0.9141	0.006721	0.07868	3	3	HBA1,HBA2,HBB
Pubmed	25238043	The correlation of ?-globin gene mutations and the XmnI polymorphism with clinical severity of Hb E/?-thalassemia.	Pubmed	1.341e-05	0.9141	0.006721	0.07868	3	3	HBA1,HBA2,HBB
Pubmed	10390349	Modulation of ligand binding in engineered human hemoglobin distal pocket.	Pubmed	1.341e-05	0.9141	0.006721	0.07868	3	3	HBA1,HBA2,HBB
Pubmed	9894000	Structural and functional properties of human hemoglobins reassembled after synthesis in Escherichia coli.	Pubmed	1.341e-05	0.9141	0.006721	0.07868	3	3	HBA1,HBA2,HBB
Pubmed	12372778	Three GADD45 isoforms contribute to hypertonic stress phenotype of murine renal inner medullary cells.	Pubmed	1.341e-05	0.9141	0.006721	0.07868	3	3	GADD45B,GADD45G,GADD45A
Pubmed	1552945	A human recombinant haemoglobin designed for use as a blood substitute.	Pubmed	1.341e-05	0.9141	0.006721	0.07868	3	3	HBA1,HBA2,HBB
Pubmed	22183073	Relationship between maternal hemoglobin concentration and neonatal birth weight.	Pubmed	1.341e-05	0.9141	0.006721	0.07868	3	3	HBA1,HBA2,HBB
Pubmed	16883602	Biglycan binds to alpha- and gamma-sarcoglycan and regulates their expression during development.	Pubmed	1.341e-05	0.9141	0.006721	0.07868	3	3	SGCA,SGCG,BGN
Pubmed	15835899	Crystallographic evidence for a new ensemble of ligand-induced allosteric transitions in hemoglobin: the T-to-T(high) quaternary transitions.	Pubmed	1.341e-05	0.9141	0.006721	0.07868	3	3	HBA1,HBA2,HBB
Pubmed	1512262	A third quaternary structure of human hemoglobin A at 1.7-A resolution.	Pubmed	1.341e-05	0.9141	0.006721	0.07868	3	3	HBA1,HBA2,HBB
Pubmed	19843387	Alpha globin gene numbers: an important modifier of HbE/beta thalassemia.	Pubmed	1.341e-05	0.9141	0.006721	0.07868	3	3	HBA1,HBA2,HBB
Pubmed	15262964	Gadd45 proteins induce G2/M arrest and modulate apoptosis in kidney cells exposed to hyperosmotic stress.	Pubmed	1.341e-05	0.9141	0.006721	0.07868	3	3	GADD45B,GADD45G,GADD45A
Pubmed	24104471	Gadd45 in modulation of solid tumors and leukemia.	Pubmed	1.341e-05	0.9141	0.006721	0.07868	3	3	GADD45B,GADD45G,GADD45A
Pubmed	20565961	Tgfbeta2 and 3 are coexpressed with their extracellular regulator Ltbp1 in the early limb bud and modulate mesodermal outgrowth and BMP signaling in chicken embryos.	Pubmed	1.341e-05	0.9141	0.006721	0.07868	3	3	TGFB2,TGFB3,LTBP1
Pubmed	31745206	Complementary proteomics strategies capture an ataxin-1 interactome in Neuro-2a cells.	Pubmed	1.369e-05	0.9333	0.006812	0.07976	33	616	RPL27A,MAP4,ACTA1,RPS10,ACTN2,SLC25A5,VAT1L,SEC31A,ATP5MG,SMARCE1,SNRPN,NARS1,NDUFA9,SUPT5H,EBNA1BP2,TAF10,NPM1,PDHB,HMGB2,PFKP,UQCR10,AP2M1,CLIC1,UCHL1,FADS2,PYCR2,HSPA2,PRKACA,DLD,DRG2,TRAP1,MRTO4,RPL5
Pubmed	9110174	Large-scale concatenation cDNA sequencing.	Pubmed	1.411e-05	0.9622	0.006973	0.08163	31	562	MAP4,PI4K2A,SCO1,SLC25A6,TMEM134,AZIN1,GHITM,ARRDC2,ZNF415,KIF1A,NARS1,RRAGC,NSFL1C,SUPT5H,C19orf25,CAMK2B,PRMT2,MEAF6,CRYAB,RAB11FIP3,HTRA1,DBP,GALNT18,SMYD2,IVD,C14orf132,DIO2,CLBA1,PLXDC1,TSC22D3,SPRYD7
Pubmed	7757816	[IMAGE: molecular integration of the analysis of the human genome and its expression].	Pubmed	1.5e-05	1	0.007307	0.08554	7	35	AMPH,BEX3,FASTK,EBNA1BP2,GTF2B,YPEL1,BRINP1
Pubmed	23236519	Ablation of the cardiac-specific gene leucine-rich repeat containing 10 (Lrrc10) results in dilated cardiomyopathy.	Pubmed	1.5e-05	1	0.007307	0.08554	7	35	ACTN2,ATP5PO,NPPA,TNNI3,TNNT1,TPM1,COX7A1
Pubmed	14574404	The DNA sequence and analysis of human chromosome 6.	Pubmed	1.611e-05	1	0.007788	0.09118	33	621	RPS18,MEA1,OARD1,UQCC2,DNPH1,RNASET2,DLK2,KIF13A,ATP6V1G2,FRS3,SMOC2,RPL10A,MICA,DDR1,BVES-AS1,RUNX2,TEAD3,GRM1,DDAH2,PHF1,CLIC1,GTF2H5,COL9A1,CCDC28A,COX7A2,ATF6B,TJAP1,CCN2,HSD17B8,SMIM8,ZDHHC14,AKIRIN2,SDHAF4
Pubmed	9136932	GATA4 transcription factor is required for ventral morphogenesis and heart tube formation.	Pubmed	1.782e-05	1	0.008556	0.1002	5	15	MYL9,MYL2,NPPA,TNNI3,MYL7
Pubmed	27503909	Gsk3? and Tomm20 are substrates of the SCFFbxo7/PARK15 ubiquitin ligase associated with Parkinson's disease.	Pubmed	1.897e-05	1	0.009045	0.1059	27	463	RPS3,RPS12,RPS18,ATAT1,MDK,S100A13,CXCL9,FMOD,SLC25A5,SLC25A6,PHLDA1,DNAJC30,CHCHD6,PABPC1,ERICH2,SMOC2,GRK6,PCBP2,HMGB2,ZNF688,UBB,LETMD1,CLIP3,PSMB2,SPATA4,AKIRIN2,MIR1-1HG-AS1
Pubmed	11118473	Sensitive nonradioactive detection of mRNA in tissue sections: novel application of the whole-mount in situ hybridization protocol.	Pubmed	1.996e-05	1	0.009448	0.1106	4	8	MYL2,NPPA,IRX1,IRX2
Pubmed	29997244	LuTHy: a double-readout bioluminescence-based two-hybrid technology for quantitative mapping of protein-protein interactions in mammalian cells.	Pubmed	2.009e-05	1	0.009448	0.1106	17	219	S100A1,S100A6,PPFIA4,ARHGAP1,ARL2,SNCA,LSM3,SOCS2,NSFL1C,HBA1,HBA2,TNNI3,HBB,AP2S1,PEX16,HSF1,RAD23A
Pubmed	18495661	The nuclear transcription factor RARalpha associates with neuronal RNA granules and suppresses translation.	Pubmed	2.076e-05	1	0.009696	0.1135	8	50	RPS3,RPS6,RPS12,PABPC1,NME1,AP2M1,DES,RBM3
Pubmed	19834535	Sequential use of transcriptional profiling, expression quantitative trait mapping, and gene association implicates MMP20 in human kidney aging.	Pubmed	2.261e-05	1	0.01049	0.1228	11	99	MAP4,RPS18,GPNMB,MPC1,FIBIN,GLRB,CLIC6,TGFB2,THBS4,COX7A2L,RGS6
Pubmed	19946888	Defining the membrane proteome of NK cells.	Pubmed	2.317e-05	1	0.01065	0.1246	51	1168	DCAKD,RPL27A,RPS3,RPS6,RPS8,RPS10,RPS12,PI4K2A,RPS18,RPS27A,MGST3,H4C8,C1QTNF3,SLC25A5,SLU7,APOE,PABPC1,PELP1,CYB5R1,NAP1L1,DPM1,NCDN,STAU1,RPL10A,NME1,GNG5,NPM1,GRK6,GYS1,NUP188,HBA1,HBA2,PCBP2,DDX19B,PFKP,PFN1,TUFM,CLIC1,PEX16,FADS2,HSPA2,CHD5,ITPRIP,PSMB2,DAD1,TOMM22,KLC1,DRG2,TRAP1,LSP1,RPL5
Pubmed	16385451	A scan of chromosome 10 identifies a novel locus showing strong association with late-onset Alzheimer disease.	Pubmed	2.326e-05	1	0.01065	0.1246	25	416	SYNPO2L,PI4K2A,GLRX3,INPP5F,ZNF365,MSRB2,GHITM,NT5C2,OGDHL,POLL,PYROXD2,DEPP1,PDLIM1,PCBD1,PFKP,HPS1,ITPRIP,HTRA1,IDI2,RHOBTB1,PCDH15,SLC16A9,ARMC4,RASSF4,PLCE1
Pubmed	16381901	The LIFEdb database in 2006.	Pubmed	2.476e-05	1	0.01125	0.1318	36	720	MORN4,PAK4,MAP3K3,TADA3,SORBS2,YIPF4,LYAR,FAM214B,ATP5MG,CCDC113,GHITM,CCND1,NDP,MOAP1,BGN,PROM1,SLC38A3,CAMK2B,DEPP1,TMED4,THY1,HBB,PDHB,GABARAPL2,ICA1,PNKD,CRYAB,IGSF1,ABHD11,MAP3K7CL,GADD45A,HSD17B8,C1orf54,STMN1,COQ4,FARP1
Pubmed	12975309	The secreted protein discovery initiative (SPDI), a large-scale effort to identify novel human secreted and transmembrane proteins: a bioinformatics assessment.	Pubmed	2.509e-05	1	0.01133	0.1326	45	987	CLEC1A,SCN2B,C1QTNF3,GPNMB,C5orf46,IL31RA,PI16,ITGA10,ALKAL2,GHITM,DLK2,LAYN,ADAM18,ARID5A,LIN7B,PRRT3,B3GNT9,SHISA2,OMD,SYNGR2,NXPH4,EDA2R,SEZ6L,MGAT4B,DHRS3,PPCDC,CYTL1,PLA2G15,C16orf89,SEMA5B,CTHRC1,SDF2L1,PNKD,ITPRIP,ASPN,LYPD1,C1orf56,TMCO3,TMEM231,CRISPLD1,PLD4,ACE2,ST8SIA2,TMEM143,HSD17B14
Pubmed	25987543	Nebulette knockout mice have normal cardiac function, but show Z-line widening and up-regulation of cardiac stress markers.	Pubmed	2.541e-05	1	0.01133	0.1326	5	16	ACTN2,MYL2,TPM1,MYL7,DES
Pubmed	14594945	MARK4 is a novel microtubule-associated proteins/microtubule affinity-regulating kinase that binds to the cellular microtubule network and to centrosomes.	Pubmed	2.541e-05	1	0.01133	0.1326	5	16	MAP2,MAP4,ACTA1,MARK4,TUBA4A
Pubmed	25192599	Interaction of amyotrophic lateral sclerosis/frontotemporal lobar degeneration-associated fused-in-sarcoma with proteins involved in metabolic and protein degradation pathways.	Pubmed	2.568e-05	1	0.01137	0.1331	16	201	RPS8,MAP3K3,H2BC21,SLC25A5,NAP1L1,NPM1,PCBP2,PFN1,YPEL1,TUFM,TRPM4,TXNL4B,RAB7A,DLD,SAE1,PLCE1
Pubmed	16713569	A protein-protein interaction network for human inherited ataxias and disorders of Purkinje cell degeneration.	Pubmed	2.595e-05	1	0.01139	0.1333	32	608	MBP,MIF4GD,TNIP1,ACTN2,MDK,SCG5,PPFIA4,SIAH2,R3HDM2,CYB5R1,NARS1,MOAP1,ARID5A,RRAGC,NPPA,RBPMS,DEPP1,THY1,ZNF277,ZBED1,PCBP2,CCDC159,AP2M1,CBY1,FADS2,PYCR2,HSPA2,PCBP4,RAD23A,ATP5IF1,STMN1,LTBP1
Pubmed	22130515	Tbx2 and Tbx3 induce atrioventricular myocardial development and endocardial cushion formation.	Pubmed	2.605e-05	1	0.01139	0.1333	6	26	MDK,FRZB,NPPA,TGFB2,LUM,LEF1
Pubmed	15489336	From ORFeome to biology: a functional genomics pipeline.	Pubmed	2.623e-05	1	0.01139	0.1334	36	722	MORN4,PAK4,MAP3K3,TADA3,SORBS2,YIPF4,LYAR,FAM214B,ATP5MG,CCDC113,GHITM,CCND1,NDP,MOAP1,BGN,PROM1,SLC38A3,CAMK2B,DEPP1,TMED4,THY1,HBB,PDHB,GABARAPL2,ICA1,PNKD,CRYAB,IGSF1,ABHD11,MAP3K7CL,GADD45A,HSD17B8,C1orf54,STMN1,COQ4,FARP1
Pubmed	29735542	PML Recruits TET2 to Regulate DNA Modification and Cell Proliferation in Response to Chemotherapeutic Agent.	Pubmed	2.732e-05	1	0.01179	0.138	9	67	ACTA1,RPS18,MYL9,SLC25A6,PABPC1,MYL12A,ELOB,TPM1,TPM3
Pubmed	26209609	Systematic Determination of Human Cyclin Dependent Kinase (CDK)-9 Interactome Identifies Novel Functions in RNA Splicing Mediated by the DEAD Box (DDX)-5/17 RNA Helicases.	Pubmed	2.806e-05	1	0.01203	0.1409	20	295	RPL27A,MAP4,RPS3,RPS6,RPS8,RPS10,RPS18,NPM3,SLC25A5,PABPC1,MYL12A,NDUFA4,BANF1,STAU1,RPL10A,SQSTM1,NPM1,TPM1,TPM3,PFN1
Pubmed	24244333	Profiling of Parkin-binding partners using tandem affinity purification.	Pubmed	2.899e-05	1	0.01235	0.1446	16	203	RPS6,RPS8,RPS27A,SLC25A5,MRPS18B,MYL12A,ATP5PO,NACA,NDUFA10,NPM1,PCCB,TPM1,TPM3,TUBA4A,TUFM,HSPA2
Pubmed	26618866	?F508 CFTR interactome remodelling promotes rescue of cystic fibrosis.	Pubmed	2.929e-05	1	0.0124	0.1452	33	640	RPS12,ACTN2,MYL9,TARS2,PABPC1,MYL12A,ATP5MG,EIF3I,FSCN1,ATP5PO,NAP1L1,NDUFA9,DPM1,STAU1,RPL10A,EBNA1BP2,NME1,TAF10,ELOB,PCBP2,TPM1,PFN1,CLIC1,QPCT,DNAJB2,POLR2E,PPP2R2B,ISG15,PSMB2,PSMD8,DES,SAE1,RPL5
Pubmed	11164852	Molecular characterization of the ventricular conduction system in the developing mouse heart: topographical correlation in normal and congenitally malformed hearts.	Pubmed	3.526e-05	1	0.01477	0.1729	4	9	MYL2,TNNI3,MYL7,DES
Pubmed	15464586	GATA4 is a dosage-sensitive regulator of cardiac morphogenesis.	Pubmed	3.53e-05	1	0.01477	0.1729	5	17	MYL2,CCND1,NPPA,MYL7,DES
Pubmed	11790298	Directed proteomic analysis of the human nucleolus.	Pubmed	3.895e-05	1	0.0162	0.1896	16	208	RPL27A,RPS6,RPS8,RPS12,RPS18,NPM3,LYAR,RPL10A,EBNA1BP2,NPM1,TUFM,UBB,HSPA2,POLR2E,MRTO4,RPL5
Pubmed	19060904	An empirical framework for binary interactome mapping.	Pubmed	3.962e-05	1	0.01637	0.1917	17	231	TSR2,PHLDA1,NT5C2,LSM3,NME1,B3GNT9,DEPP1,SDSL,DDAH2,RAB33A,HOMER3,MEAF6,GDF15,DCAF8,AGTRAP,APIP,HSD17B14
Pubmed	26673895	A deep proteomics perspective on CRM1-mediated nuclear export and nucleocytoplasmic partitioning.	Pubmed	4.064e-05	1	0.01669	0.1954	46	1038	RPS3,RPS6,RPS8,PAK4,RPS10,IER5,TNIP1,RPS18,MAP3K3,SLU7,SEC31A,PABPC1,ARHGAP1,SMARCE1,TRAK2,SAMD4A,NAP1L1,NCDN,RPL10A,DNAAF3,SQSTM1,AP3M2,KIAA0556,OSCP1,C1orf198,GYS1,MKRN2,PACSIN3,TUBA4A,TFPT,AP2M1,CCDC28A,POLR2E,XPA,DNTTIP1,PPP4C,PRKACA,TJAP1,DCAF8,GAB2,C14orf119,HSPB8,DRG2,DVL3,KIAA1191,RPL5
Pubmed	26460568	Kelch Domain of Gigaxonin Interacts with Intermediate Filament Proteins Affected in Giant Axonal Neuropathy.	Pubmed	4.166e-05	1	0.01701	0.1991	15	187	RPS3,RPS6,RPS8,RPS10,RPS27A,SLC25A5,SLC25A6,PABPC1,EIF3I,SNRPN,NPM1,OXA1L,SEMA5B,HSPA2,TRAP1
Pubmed	27049334	Nuclear Functions of Nucleolin through Global Proteomics and Interactomic Approaches.	Pubmed	4.25e-05	1	0.01725	0.2019	13	145	RPL27A,RPS3,RPS6,RPS8,RPS10,RPS12,RPS18,C7orf50,LYAR,SNRPN,EBNA1BP2,MRTO4,RPL5
Pubmed	8619474	A "double adaptor" method for improved shotgun library construction.	Pubmed	4.304e-05	1	0.01736	0.2033	30	568	MAP4,PI4K2A,SCO1,SLC25A6,TMEM134,AZIN1,GHITM,ARRDC2,ZNF415,KIF1A,NARS1,RRAGC,SUPT5H,C19orf25,CAMK2B,PRMT2,MEAF6,CRYAB,RAB11FIP3,HTRA1,DBP,GALNT18,SMYD2,IVD,C14orf132,DIO2,CLBA1,PLXDC1,TSC22D3,SPRYD7
Pubmed	21565611	Mapping the NPHP-JBTS-MKS protein network reveals ciliopathy disease genes and pathways.	Pubmed	4.344e-05	1	0.01742	0.204	28	513	MAP2,MAP4,RPS3,RPS6,RPS27A,B9D1,FSCN1,DTD1,ATP6V1G2,NACA,CPLX1,NAP1L1,NDUFA4,RBPMS,NUP188,HBA2,TPM1,TPM3,DDAH1,TUBA4A,TUFM,UBB,UCHL1,HSPA2,CRYAB,PSMB2,TRAP1,COQ4
Pubmed	29617656	Impaired Spermatogenesis, Muscle, and Erythrocyte Function in U12 Intron Splicing-Defective Zrsr1 Mutant Mice.	Pubmed	4.436e-05	1	0.01762	0.2062	7	41	ZRSR2,ZPR1,TCEA2,U2AF1L4,DNTTIP1,ZCRB1,SPAG16
Pubmed	26638075	A Dynamic Protein Interaction Landscape of the Human Centrosome-Cilium Interface.	Pubmed	4.773e-05	1	0.01762	0.2062	70	1820	MAP2,LYPLAL1,PAK4,MCAM,TNIP1,SKA2,MGST3,PHLDB3,SEC31A,ARHGAP1,ATP5MG,ARL2,NT5C2,B9D1,KIF1A,JAGN1,NACA,NAP1L1,NARS1,BBS4,NDUFA9,BANF1,COMMD6,STAU1,YIF1A,SUPT5H,SQSTM1,PRRT3,DCLK2,EBNA1BP2,C19orf25,CAMK2B,TRIM41,SHISA2,C1orf198,SH3D19,GYS1,PRAF2,SNAPIN,DDX19B,VPS45,HMGB2,PFDN1,PFDN4,AP2S1,PDCL3,CLNS1A,FADS2,SDF2L1,PYCR2,HSPA2,IFT22,FAAP20,POLR2E,PPP2R2B,PPP4C,PRKACA,LRRC49,DAD1,DAPK3,KCNC4,PTPRR,RA…
Pubmed	28846746	CTCF counter-regulates cardiomyocyte development and maturation programs in the embryonic heart.	Pubmed	4.793e-05	1	0.01762	0.2062	5	18	NPPA,TNNI3,TNNT1,IRX1,IRX2
Pubmed	28977470	The PRMT5/WDR77 complex regulates alternative splicing through ZNF326 in breast cancer.	Pubmed	4.902e-05	1	0.01762	0.2062	13	147	RPS3,RPS10,RPS18,RPS27A,MYL12A,STAU1,SUPT5H,SQSTM1,CLIC1,MYL6B,CLNS1A,CHD5,RAB11FIP3
Pubmed	30166453	CRL4	Pubmed	5.108e-05	1	0.01762	0.2062	11	108	USP11,SLC25A6,TARS2,DPM1,SOCS2,SQSTM1,MLLT11,ELOB,TUFM,SDF2L1,DCAF8
Pubmed	10508692	The ins and outs of circadian timekeeping.	Pubmed	5.142e-05	1	0.01762	0.2062	3	4	PER3,PER2,DBP
Pubmed	19657833	Description of two new alpha variants: Hb Canuts [alpha85(F6)Asp-->His (alpha1)] and Hb Ambroise Pare [alpha117(GH5)Phe-->Ile (alpha2)]; two new beta variants: Hb Beaujolais [beta84(EF8)Thr-->Asn] and Hb Monplaisir [beta147 (Tyr-Lys-Leu-Ala-Phe-Phe-Leu-Leu-Ser-Asn-Phe-Tyr-158-COOH)] and one new delta variant: Hb (A2)North Africa [delta59(E3)Lys-->Met].	Pubmed	5.142e-05	1	0.01762	0.2062	3	4	HBA1,HBA2,HBB
Pubmed	16597604	Effects of expression of p53 and Gadd45 on osmotic tolerance of renal inner medullary cells.	Pubmed	5.142e-05	1	0.01762	0.2062	3	4	GADD45B,GADD45G,GADD45A
Pubmed	19740759	Peroxidase activity of hemoglobin-haptoglobin complexes: covalent aggregation and oxidative stress in plasma and macrophages.	Pubmed	5.142e-05	1	0.01762	0.2062	3	4	HBA1,HBA2,HBB
Pubmed	6683087	Separation of zeta (zeta) and various gamma (gamma) chains of human embryonic hemoglobin Portland I by reverse-phase high-performance liquid chromatography.	Pubmed	5.142e-05	1	0.01762	0.2062	3	4	HBA1,HBA2,HBB
Pubmed	28729659	Identification of a hybrid myocardial zone in the mammalian heart after birth.	Pubmed	5.142e-05	1	0.01762	0.2062	3	4	NPPA,NPR3,TNNI3
Pubmed	12716909	CR6-interacting factor 1 interacts with Gadd45 family proteins and modulates the cell cycle.	Pubmed	5.142e-05	1	0.01762	0.2062	3	4	GADD45B,GADD45G,GADD45A
Pubmed	11603807	Alpha-synuclein has an altered conformation and shows a tight intermolecular interaction with ubiquitin in Lewy bodies.	Pubmed	5.142e-05	1	0.01762	0.2062	3	4	SNCA,UBB,UCHL1
Pubmed	9827804	A family of stress-inducible GADD45-like proteins mediate activation of the stress-responsive MTK1/MEKK4 MAPKKK.	Pubmed	5.142e-05	1	0.01762	0.2062	3	4	GADD45B,GADD45G,GADD45A
Pubmed	20301608	Alpha-Thalassemia	Pubmed	5.142e-05	1	0.01762	0.2062	3	4	HBA1,HBA2,HBB
Pubmed	16649168	Patterning the heart, a template for human cardiomyocyte development.	Pubmed	5.142e-05	1	0.01762	0.2062	3	4	MYL2,NPPA,MYL7
Pubmed	16225851	Interactions of HSP22 (HSPB8) with HSP20, alphaB-crystallin, and HSPB3.	Pubmed	5.142e-05	1	0.01762	0.2062	3	4	CRYAB,HSPB6,HSPB8
Pubmed	3457014	Type beta transforming growth factor in human platelets: release during platelet degranulation and action on vascular smooth muscle cells.	Pubmed	5.142e-05	1	0.01762	0.2062	3	4	TGFB2,TGFB3,LEFTY2
Pubmed	22355375	Osteoadherin accumulates in the predentin towards the mineralization front in the developing tooth.	Pubmed	5.142e-05	1	0.01762	0.2062	3	4	FMOD,BGN,OMD
Pubmed	23293293	Kif5b controls the localization of myofibril components for their assembly and linkage to the myotendinous junctions.	Pubmed	5.142e-05	1	0.01762	0.2062	3	4	NES,MYL2,DES
Pubmed	12752375	Neuronal lineage-specific induction of phospholipase Cepsilon expression in the developing mouse brain.	Pubmed	5.142e-05	1	0.01762	0.2062	3	4	MAP2,NES,PLCE1
Pubmed	1309697	Subunits VIIa,b,c of human cytochrome c oxidase. Identification of both 'heart-type' and 'liver-type' isoforms of subunit VIIa in human heart.	Pubmed	5.142e-05	1	0.01762	0.2062	3	4	COX7A1,COX7A2,COX7B
Pubmed	3166417	Organization of the distal end of mouse chromosome 4.	Pubmed	5.142e-05	1	0.01762	0.2062	3	4	ALDH4A1,NPPA,TYRP1
Pubmed	10457363	Role and interaction of connective tissue growth factor with transforming growth factor-beta in persistent fibrosis: A mouse fibrosis model.	Pubmed	5.142e-05	1	0.01762	0.2062	3	4	TGFB2,TGFB3,CCN2
Pubmed	19845562	Analysis of complement factor H Y402H, LOC387715, HTRA1 polymorphisms and ApoE alleles with susceptibility to age-related macular degeneration in Hungarian patients.	Pubmed	5.142e-05	1	0.01762	0.2062	3	4	APOE,ARMS2,HTRA1
Pubmed	18384969	Expression of the small heat shock protein family in the mouse CNS: differential anatomical and biochemical compartmentalization.	Pubmed	5.142e-05	1	0.01762	0.2062	3	4	CRYAB,HSPB6,HSPB8
Pubmed	17827158	Mechanisms for asporin function and regulation in articular cartilage.	Pubmed	5.142e-05	1	0.01762	0.2062	3	4	TGFB2,TGFB3,ASPN
Pubmed	11435706	Cloning and chromosome mapping of human and chicken Iroquois (IRX) genes.	Pubmed	5.142e-05	1	0.01762	0.2062	3	4	IRX6,IRX1,IRX2
Pubmed	30183107	Dynamical comparison between myoglobin and hemoglobin.	Pubmed	5.142e-05	1	0.01762	0.2062	3	4	HBA1,HBA2,HBB
Pubmed	18554416	Identification of transcripts with enriched expression in the developing and adult pancreas.	Pubmed	5.719e-05	1	0.01927	0.2256	30	577	RPS3,ACTN2,MDK,MFAP2,MYL9,MGST3,C12orf45,CDC26,FRZB,TTC39A,NACA,RGS11,BGN,GADD45G,ABCC8,NPPA,P2RX1,PDLIM1,TNNI3,PCBD1,TPM1,MYL7,CLU,UCP2,CCN2,DAD1,PSMD8,KCNMB1,ACE2,IRX2
Pubmed	30344098	Ubiquitin-Independent Disassembly by a p97 AAA-ATPase Complex Drives PP1 Holoenzyme Formation.	Pubmed	5.731e-05	1	0.01927	0.2256	22	361	RPL27A,RPS3,RPS6,RPS8,RPS10,RPS12,RPS18,RPS27A,FAU,SORBS2,MRPS18B,PABPC1,NAP1L1,C12orf57,BANF1,RPL10A,NSFL1C,EBNA1BP2,POLR2E,KIF22,KIAA1191,RPL5
Pubmed	9171826	Regulation of cardiac mesodermal and neural crest development by the bHLH transcription factor, dHAND.	Pubmed	5.766e-05	1	0.01927	0.2256	4	10	MYL9,MYL2,NPPA,MYL7
Pubmed	15601824	Polybromo protein BAF180 functions in mammalian cardiac chamber maturation.	Pubmed	5.766e-05	1	0.01927	0.2256	4	10	S100A13,MYL2,NPPA,MYL7
Pubmed	18498095	Expression of TGF-betas in the embryonic nervous system: analysis of interbalance between isoforms.	Pubmed	5.766e-05	1	0.01927	0.2256	4	10	MAP2,NES,TGFB2,TGFB3
Pubmed	12665801	Exploring proteomes and analyzing protein processing by mass spectrometric identification of sorted N-terminal peptides.	Pubmed	5.847e-05	1	0.01945	0.2277	18	262	SEC31A,ATP6V1G2,ATP5PO,NDUFA10,ACOT2,GNG5,C1orf198,PDLIM1,CORO6,HBA1,HBA2,TPM3,TUFM,NDUFA11,DAD1,DDT,IVD,SPRYD7
Pubmed	28581483	Blocking an N-terminal acetylation-dependent protein interaction inhibits an E3 ligase.	Pubmed	5.971e-05	1	0.01976	0.2314	27	495	MAP4,RPS3,RPS8,RPS12,RPS18,RPS27A,SLC25A5,SEC31A,EIF3I,NACA,NAP1L1,NPM1,ELOB,HBB,PCBP2,PDHB,PFN1,CLNS1A,POLR2E,DCAF8,PSMB2,RHOBTB1,DLD,KLC1,SAE1,TRAP1,RPL5
Pubmed	20890042	Integration of a Notch-dependent mesenchymal gene program and Bmp2-driven cell invasiveness regulates murine cardiac valve formation.	Pubmed	6.199e-05	1	0.02042	0.2391	6	30	MYL2,NPPA,TGFB2,HEY1,MYL7,CXCR4
Pubmed	30700554	Myocardial-specific ablation of	Pubmed	6.379e-05	1	0.02081	0.2436	5	19	ACTA1,MYL2,NPPA,TNNI3,TPM1
Pubmed	20474083	A novel custom resequencing array for dilated cardiomyopathy.	Pubmed	6.379e-05	1	0.02081	0.2436	5	19	ACTN2,TNNI3,TPM1,CTF1,DES
Pubmed	27025967	Prohibitin 1 regulates tumor cell apoptosis via the interaction with X-linked inhibitor of apoptosis protein.	Pubmed	6.446e-05	1	0.02093	0.245	35	725	RPL27A,MAP4,RPS3,USP11,RPS6,RPS8,RPS10,RPS18,SLC25A5,SLC25A6,C7orf50,TARS2,PABPC1,CCDC59,ATP5PO,NAP1L1,NDUFA10,DPM1,STAU1,RPL10A,SQSTM1,NPM1,NUP188,PCBP2,PDHB,TUBA4A,TUFM,UBB,MYL6B,SDF2L1,POLR2E,PNKD,TOMM22,RBM3,RPL5
Pubmed	21163940	Interactome mapping suggests new mechanistic details underlying Alzheimer's disease.	Pubmed	6.574e-05	1	0.02124	0.2487	11	111	PI4K2A,ACTN2,RPS27A,APOE,EFHD1,NCDN,CLU,HPS1,HTRA1,FBXL12,RAD23A
Pubmed	16130169	Proteomics of human umbilical vein endothelial cells applied to etoposide-induced apoptosis.	Pubmed	6.786e-05	1	0.02172	0.2543	9	75	S100A6,NME1,TBCA,NPM1,TPM1,TPM3,DDAH2,CLIC1,UCHL1
Pubmed	19064571	Polymorphisms in mitochondrial genes and prostate cancer risk.	Pubmed	6.786e-05	1	0.02172	0.2543	9	75	ATP5PO,BCL2,NDUFA9,NDUFA10,COX7A2L,COX6C,COX7A2,CYP11A1,SLC30A2
Pubmed	30349055	Heterozygous deletion of chromosome 17p renders prostate cancer vulnerable to inhibition of RNA polymerase II.	Pubmed	7.824e-05	1	0.02493	0.2918	17	244	RPL27A,RPS3,RPS6,RPS8,RPS18,H2AC6,SLC25A5,SLC25A6,PABPC1,RGS11,BANF1,RPL10A,NPM1,PCBP2,PCCB,TUFM,TRAP1
Pubmed	15967462	MURF-1 and MURF-2 target a specific subset of myofibrillar proteins redundantly: towards understanding MURF-dependent muscle ubiquitination.	Pubmed	8.34e-05	1	0.02645	0.3096	5	20	AKR7A2,MYL2,TNNI3,TNNT1,PDHB
Pubmed	12796502	Podocan, a novel small leucine-rich repeat protein expressed in the sclerotic glomerular lesion of experimental HIV-associated nephropathy.	Pubmed	8.892e-05	1	0.02756	0.3226	4	11	FMOD,BGN,OMD,LUM
Pubmed	12124778	GADD45b and GADD45g are cdc2/cyclinB1 kinase inhibitors with a role in S and G2/M cell cycle checkpoints induced by genotoxic stress.	Pubmed	8.892e-05	1	0.02756	0.3226	4	11	GADD45B,CCND1,GADD45G,GADD45A
Pubmed	17234970	Molecular pathway for the localized formation of the sinoatrial node.	Pubmed	8.892e-05	1	0.02756	0.3226	4	11	NPPA,TNNI3,MYL7,DES
Pubmed	20031618	Prevalence of sarcomere protein gene mutations in preadolescent children with hypertrophic cardiomyopathy.	Pubmed	8.892e-05	1	0.02756	0.3226	4	11	MYL2,TNNI3,TPM1,DES
Pubmed	10926765	Patterning the embryonic heart: identification of five mouse Iroquois homeobox genes in the developing heart.	Pubmed	8.892e-05	1	0.02756	0.3226	4	11	MYL2,NPPA,IRX1,IRX2
Pubmed	30037926	Cold-induced protein RBM3 orchestrates neurogenesis via modulating Yap mRNA stability in cold stress.	Pubmed	9.089e-05	1	0.02779	0.3253	6	32	MAP2,NES,CCND1,UCP2,CCN2,RBM3
Pubmed	19285159	Identification of polyubiquitin binding proteins involved in NF-kappaB signaling using protein arrays.	Pubmed	9.089e-05	1	0.02779	0.3253	6	32	TNIP1,NSFL1C,SQSTM1,UBL7,DNAJB2,RAD23A
Pubmed	27626371	Accessory subunits are integral for assembly and function of human mitochondrial complex I.	Pubmed	9.089e-05	1	0.02779	0.3253	6	32	NDUFA2,NDUFA9,NDUFA10,NDUFB1,DMAC1,NDUFA11
Pubmed	29656893	DNA Repair Network Analysis Reveals Shieldin as a Key Regulator of NHEJ and PARP Inhibitor Sensitivity.	Pubmed	9.192e-05	1	0.02798	0.3275	25	453	RPL22L1,TADA3,MED30,SLC25A6,PHLDA1,SHLD1,SMARCD3,SMARCE1,NDUFA4,LSM3,GLRX,MLLT11,TAF10,ELOB,TUBA4A,TERF2IP,POLR2E,PNKD,DNTTIP1,CRYAB,RHNO1,RAD9A,SAE1,NKIRAS2,NUBP2
Pubmed	20458337	MHC class II-associated proteins in B-cell exosomes and potential functional implications for exosome biogenesis.	Pubmed	9.437e-05	1	0.02852	0.3339	29	565	RPS3,RPS8,RPS18,RPS27A,H4C8,ANP32B,APOE,MYL12A,EIF3I,FSCN1,NACA,RPL10A,GNG5,SYNGR2,HBA1,HBA2,TPM3,TMC6,PFKP,PFN1,TUBA4A,TUFM,CLIC1,PSMB2,CXCR4,RAB7A,STMN1,LSP1,RPL5
Pubmed	20562862	A mouse knockout library for secreted and transmembrane proteins.	Pubmed	9.454e-05	1	0.02852	0.3339	23	400	CLEC1A,IL17D,SCN2B,C1QTNF3,C5orf46,IL31RA,LAYN,ADAM18,SHISA2,NXPH4,SEZ6L,DHRS3,CYTL1,PLA2G15,C16orf89,CTHRC1,PNKD,ASPN,LYPD1,TMCO3,CRISPLD1,ACE2,HSD17B14
Pubmed	22159717	The matrisome: in silico definition and in vivo characterization by proteomics of normal and tumor extracellular matrices.	Pubmed	9.642e-05	1	0.02896	0.3391	13	157	S100A13,MFAP2,MFAP4,ADAM19,BGN,THBS4,COL16A1,ADAMTSL5,HTRA1,ASPN,LTBP1,LTBP2,LUM
Pubmed	16712791	Identification of intrahepatic cholangiocarcinoma related genes by comparison with normal liver tissues using expressed sequence tags.	Pubmed	9.803e-05	1	0.02923	0.3423	27	510	MBP,ACTN2,SLC25A6,RNASET2,ST6GALNAC4,TTC39A,PSENEN,C9orf78,C12orf57,NDUFA9,RRAGC,ADHFE1,PRAF2,TPD52L1,AGBL5,AP2S1,CLIC1,COX7A2,XPA,ATP5MPL,MASP1,ZFAS1,LYPD1,TOMM22,CLEC2B,RAD9A,COQ4
Pubmed	22810585	Viral immune modulators perturb the human molecular network by common and unique strategies.	Pubmed	9.819e-05	1	0.02923	0.3423	11	116	RPS3,RPS18,H2AC6,PHLDB3,SLC25A5,SLC25A6,NAP1L1,STAU1,H2AW,NPM1,STMN1
Pubmed	24797263	Proteomic analysis of the epidermal growth factor receptor (EGFR) interactome and post-translational modifications associated with receptor endocytosis in response to EGF and stress.	Pubmed	9.87e-05	1	0.02924	0.3423	20	323	TARS2,ARHGAP1,ATP5MG,KIF1A,NDUFA9,DPM1,SULT1A1,ORC5,TPM3,PFKP,AP2M1,AP2S1,CLU,FADS2,SDF2L1,PYCR2,DNAAF5,TOMM22,NUBP2,MRTO4
Pubmed	25277244	The functional landscape of Hsp27 reveals new cellular processes such as DNA repair and alternative splicing and proposes novel anticancer targets.	Pubmed	9.907e-05	1	0.02924	0.3423	16	225	ACTN2,MYL9,UQCC2,MYL12A,NAP1L1,LSM3,SUPT5H,SQSTM1,WDR66,ENPP2,MRPL40,PSMB2,DES,TMCO3,KLC1,RAD23A
Pubmed	23063798	Myocardial Mycn is essential for mouse ventricular wall morphogenesis.	Pubmed	0.0001073	1	0.03155	0.3693	5	21	ACTA1,MYL2,CCND1,TNNI3,MYL7
Pubmed	26561776	Reversible oxidation of phosphatase and tensin homolog (PTEN) alters its interactions with signaling and regulatory proteins.	Pubmed	0.0001094	1	0.03202	0.3749	10	98	RPL27A,RPS3,RPS6,RPS27A,RPL22L1,SLC25A5,MYL12A,RPL10A,NME1,TUFM
Pubmed	23438482	Proteomic analysis of the NOS2 interactome in human airway epithelial cells.	Pubmed	0.0001113	1	0.03242	0.3795	12	138	RPS3,RPS18,ALDH3B1,SLC25A5,NAP1L1,NPM1,ELOB,PCBP2,CLNS1A,HSPA2,PSMD8,RPL5
Pubmed	25450958	Comparative analysis of developmentally regulated expressions of Gadd45a, Gadd45b, and Gadd45g in the mouse and marmoset cerebral cortex.	Pubmed	0.0001263	1	0.03481	0.4075	3	5	GADD45B,GADD45G,GADD45A
Pubmed	18385073	Novel allele of crybb2 in the mouse and its expression in the brain.	Pubmed	0.0001263	1	0.03481	0.4075	3	5	SCG5,CAPN3,STMN1
Pubmed	30271984	Activated protein C reverses epigenetically sustained p66	Pubmed	0.0001263	1	0.03481	0.4075	3	5	F2R,F2RL2,APOE
Pubmed	17916326	Membrane interactions of hemoglobin variants, HbA, HbE, HbF and globin subunits of HbA: effects of aminophospholipids and cholesterol.	Pubmed	0.0001263	1	0.03481	0.4075	3	5	HBA1,HBA2,HBB
Pubmed	8798433	Primary structure, neural-specific expression, and chromosomal localization of Cux-2, a second murine homeobox gene related to Drosophila cut.	Pubmed	0.0001263	1	0.03481	0.4075	3	5	ATP5ME,CUX2,MAFK
Pubmed	18620607	Fragmentation of decorin, biglycan, lumican and keratocan is elevated in degenerate human meniscus, knee and hip articular cartilages compared with age-matched macroscopically normal and control tissues.	Pubmed	0.0001263	1	0.03481	0.4075	3	5	FMOD,BGN,LUM
Pubmed	11159543	Expression, purification, and characterization of human hemoglobins Gower-1 (zeta(2)epsilon(2)), Gower-2 (alpha(2)epsilon(2)), and Portland-2 (zeta(2)beta(2)) assembled in complex transgenic-knockout mice.	Pubmed	0.0001263	1	0.03481	0.4075	3	5	HBA1,HBA2,HBB
Pubmed	15509702	Genetic influences on ovulation of primary oocytes in LT/Sv strain mice.	Pubmed	0.0001263	1	0.03481	0.4075	3	5	MAP2,BCL2,SERPINE2
Pubmed	8207020	Chamber specification of atrial myosin light chain-2 expression precedes septation during murine cardiogenesis.	Pubmed	0.0001263	1	0.03481	0.4075	3	5	MYL9,MYL2,MYL7
Pubmed	24552666	Genes encoding proteoglycans are associated with the risk of anterior cruciate ligament ruptures.	Pubmed	0.0001263	1	0.03481	0.4075	3	5	FMOD,BGN,LUM
Pubmed	10427098	ZASP: a new Z-band alternatively spliced PDZ-motif protein.	Pubmed	0.0001263	1	0.03481	0.4075	3	5	ACTN2,MYOZ1,MYOZ3
Pubmed	23331954	The regulatory roles of small leucine-rich proteoglycans in extracellular matrix assembly.	Pubmed	0.0001263	1	0.03481	0.4075	3	5	FMOD,BGN,LUM
Pubmed	9010342	Changes in levels of mRNAs of transforming growth factor (TGF)-beta1, -beta2, -beta3, TGF-beta type II receptor and sulfated glycoprotein-2 during apoptosis of mouse uterine epithelium.	Pubmed	0.0001263	1	0.03481	0.4075	3	5	TGFB2,TGFB3,CLU
Pubmed	16959763	Transgenic mouse proteomics identifies new 14-3-3-associated proteins involved in cytoskeletal rearrangements and cell signaling.	Pubmed	0.0001276	1	0.03481	0.4075	12	140	MAP2,ACTA1,MBP,PACS1,MARK4,CAMK2B,PDHB,PFKP,TUFM,HSPA2,HOMER3,AK5
Pubmed	17661394	Insights into function and regulation of small heat shock protein 25 (HSPB1) in a mouse model with targeted gene disruption.	Pubmed	0.0001309	1	0.03481	0.4075	4	12	CRYAB,HSPB6,DES,HSPB8
Pubmed	16120388	Mitochondrial membrane permeabilization by HIV-1 Vpr.	Pubmed	0.0001309	1	0.03481	0.4075	4	12	SLC25A5,SLC25A6,BCL2,RAD23A
Pubmed	14633990	NRSF regulates the fetal cardiac gene program and maintains normal cardiac structure and function.	Pubmed	0.0001309	1	0.03481	0.4075	4	12	ACTA1,MYL2,HCN2,NPPA
Pubmed	14634002	Selective contribution of eukaryotic prefoldin subunits to actin and tubulin binding.	Pubmed	0.0001309	1	0.03481	0.4075	4	12	ACTA1,PFDN1,PFDN4,TUBA4A
Pubmed	7596406	Cloning of a gene bearing missense mutations in early-onset familial Alzheimer's disease.	Pubmed	0.0001309	1	0.03481	0.4075	4	12	ACOT4,ACOT2,EBNA1BP2,RGS6
Pubmed	25299188	BAF200 is required for heart morphogenesis and coronary artery development.	Pubmed	0.0001309	1	0.03481	0.4075	4	12	ACTN2,MYL2,TNNI3,MYL7
Pubmed	31042497	SEMA6D regulates perinatal cardiomyocyte proliferation and maturation in mice.	Pubmed	0.0001309	1	0.03481	0.4075	4	12	ACTA1,CCND1,TNNI3,MYL7
Pubmed	16314518	Mammalian E4 is required for cardiac development and maintenance of the nervous system.	Pubmed	0.0001309	1	0.03481	0.4075	4	12	ACTN2,MYL2,NPPA,MYL7
Pubmed	20186120	A functional peptidyl-tRNA hydrolase, ICT1, has been recruited into the human mitochondrial ribosome.	Pubmed	0.0001313	1	0.03481	0.4075	15	207	MRPL37,SLC25A5,SLC25A6,MRPS18B,TARS2,ATP5MG,NDUFA9,OXA1L,PCCB,TUFM,AP2M1,PYCR2,NDUFAF3,MRPL40,MRPL46
Pubmed	17474147	Systematic identification of SH3 domain-mediated human protein-protein interactions by peptide array target screening.	Pubmed	0.0001317	1	0.03481	0.4075	20	330	RIN3,MAP4,EXTL1,RRAS,F2RL2,PPFIA4,DLGAP4,SMARCD3,KIF13A,HCN2,FASTK,CENPA,HMGN2,SNX8,MAP2K5,JAK2,URB1,KIF22,DUSP15,LTBP2
Pubmed	7873878	Intracisternal A-type particle elements as genetic markers: detection by repeat element viral element amplified locus-PCR.	Pubmed	0.0001362	1	0.03572	0.4182	5	22	FCER1A,ASIP,NPPA,ODC1,HMGCL
Pubmed	27407143	Lmx1a and Lmx1b regulate mitochondrial functions and survival of adult midbrain dopaminergic neurons.	Pubmed	0.0001362	1	0.03572	0.4182	5	22	UQCRQ,SNCA,NDUFA2,NDUFA4,UQCR11
Pubmed	30196744	ATG5 is required for B cell polarization and presentation of particulate antigens.	Pubmed	0.0001384	1	0.03614	0.4232	32	665	MAP4,RPS12,NPM3,FAU,MED30,PABPC1,CXorf56,UQCRQ,EIF3I,NAP1L1,NARS1,DPM1,BANF1,SQSTM1,PPIL3,TAF10,ELOB,RPUSD4,PDHB,HMGN2,PFKP,PFN1,TUBA4A,TUFM,AP2M1,CLIC1,POLR2E,SYF2,TRAP1,SBDS,RPL5,RBFA
Pubmed	30455355	Physiological and pathophysiological characteristics of ataxin-3 isoforms.	Pubmed	0.0001419	1	0.03693	0.4324	18	281	RPS3,RPS6,RPS8,RPS12,SLC25A5,SLC25A6,RNF126,ATP5PO,NAP1L1,NDUFA4,DPM1,NME1,NPM1,PFN1,TUBA4A,PSMB2,DLD,RAD23A
Pubmed	28611215	Genome-wide CRISPR screen identifies HNRNPL as a prostate cancer dependency regulating RNA splicing.	Pubmed	0.0001528	1	0.03944	0.4617	58	1489	DCAKD,MAP2,MAP4,MBP,SAMD12,ATAT1,AFMID,SHB,MACROD1,CHCHD6,C7orf50,TARS2,PACS1,TMEM242,EFHD1,NT5C2,SH3RF3,GABRE,KIF1A,CCND1,SMOC2,NCDN,TSPAN9,ABCC8,KIAA0556,DCLK2,DDR1,CAMK2B,PCNX4,NXPH4,FRMD3,DHRS3,VPS45,TMC6,TERF2IP,DNTTIP1,PPP4C,TJAP1,TRPM4,DCAF8,GALNT18,DDT,JAK2,DNAAF5,PTPRR,TXNL4B,RAB7A,MIR99AHG,CLBA1,SLC16A9,ZDHHC14,EFNA1,FARP1,LRRC1,TANGO2,TMEM143,HSD17B14,GPA33
Pubmed	19411759	Fog2 is critical for cardiac function and maintenance of coronary vasculature in the adult mouse heart.	Pubmed	0.0001533	1	0.03944	0.4617	6	35	FGF1,NPPA,VEGFB,CTF1,CCN2,KCNE1
Pubmed	27142060	Identification of the BRD1 interaction network and its impact on mental disorder risk.	Pubmed	0.0001533	1	0.03944	0.4617	6	35	RPL22L1,LYAR,EIF3I,NPM1,MEAF6,CHD5
Pubmed	30425250	Proteome-wide analysis of USP14 substrates revealed its role in hepatosteatosis via stabilization of FASN.	Pubmed	0.0001546	1	0.03964	0.4641	20	334	RPL27A,MAP4,RPS3,RPS10,RPS18,ATP5MG,EFHD1,NACA,NAP1L1,NARS1,BANF1,NME1,PDHB,HMGB2,HMGN2,UBB,PSMB2,PSMD8,RBM3,RPL5
Pubmed	29688375	CITGeneDB: a comprehensive database of human and mouse genes enhancing or suppressing cold-induced thermogenesis validated by perturbation experiments in mice.	Pubmed	0.000156	1	0.03969	0.4647	12	143	MFAP2,ARRDC3,GADD45G,PER2,NPR3,UCP2,HSF1,PRKAB1,JAK2,CXCR4,DIO2,MFN2
Pubmed	22008794	Integrated microarray and ChIP analysis identifies multiple Foxa2 dependent target genes in the notochord.	Pubmed	0.000156	1	0.03969	0.4647	12	143	SIAH2,RAB20,ERICH2,CA3,MTURN,SDSL,COL22A1,ZNF688,CLU,CCN2,IGSF1,HTRA1
Pubmed	25670202	Ski regulates Hippo and TAZ signaling to suppress breast cancer progression.	Pubmed	0.0001648	1	0.04176	0.4889	9	84	RPS3,SLC25A5,SLC25A6,PABPC1,ATP5PO,SQSTM1,PFKP,TUBA4A,TUFM
Pubmed	21423176	Analysis of the myosin-II-responsive focal adhesion proteome reveals a role for ?-Pix in negative regulation of focal adhesion maturation.	Pubmed	0.0001691	1	0.04263	0.4991	18	285	RPS3,RPS8,PAK4,RPS10,MCAM,RPS18,RRAS,PABPC1,RND3,LAYN,TSPAN9,RPL10A,NPM1,THY1,PDLIM1,PCBP2,PFN1,RPL5
Pubmed	15902305	Morphogenesis of the right ventricle requires myocardial expression of Gata4.	Pubmed	0.0001707	1	0.04263	0.4991	5	23	MYL2,CCND1,NPPA,MYL7,DES
Pubmed	25863250	IGF2BP2/IMP2-Deficient mice resist obesity through enhanced translation of Ucp1 mRNA and Other mRNAs encoding mitochondrial proteins.	Pubmed	0.0001707	1	0.04263	0.4991	5	23	S100A13,ATP5ME,NDUFA2,UQCR11,ELOB
Pubmed	24725412	Ribosomal protein s15 phosphorylation mediates LRRK2 neurodegeneration in Parkinson's disease.	Pubmed	0.0001707	1	0.04263	0.4991	5	23	RPS3,RPS18,SLC25A5,SLC25A6,RPL10A
Pubmed	29228324	USP9X controls translation efficiency via deubiquitination of eukaryotic translation initiation factor 4A1.	Pubmed	0.0001805	1	0.04491	0.5258	9	85	RPS3,RPS6,RPS8,RPS10,RPS12,RPS18,PABPC1,EIF3I,SNRPN
Pubmed	19726871	MicroRNA-208a is a regulator of cardiac hypertrophy and conduction in mice.	Pubmed	0.0001855	1	0.0455	0.5327	4	13	MSTN,NPPA,DES,TMEM163
Pubmed	18513529	Relationship between sex, shape, and substrate in hypertrophic cardiomyopathy.	Pubmed	0.0001855	1	0.0455	0.5327	4	13	ACTN2,MYL2,TNNI3,TPM1
Pubmed	16702235	M line-deficient titin causes cardiac lethality through impaired maturation of the sarcomere.	Pubmed	0.0001855	1	0.0455	0.5327	4	13	SQSTM1,NPPA,TGFB2,MAP2K5
Pubmed	25898167	BORC, a multisubunit complex that regulates lysosome positioning.	Pubmed	0.0001855	1	0.0455	0.5327	4	13	BORCS7,BORCS8,SNAPIN,KLC1
Pubmed	29478914	Genome-wide CRISPR-Cas9 Screen Identifies Leukemia-Specific Dependence on a Pre-mRNA Metabolic Pathway Regulated by DCPS.	Pubmed	0.0001957	1	0.04706	0.5509	20	340	RPS3,ACTA1,RPS10,RPS12,RPS18,S100A6,SLC25A5,ATP5PO,RPL10A,POLR1E,NUP188,PCBP2,PDHB,PPCDC,HMGN2,PFN1,TUBA4A,TUFM,MEAF6,URB1
Pubmed	27914912	Identification of FOXJ1 effectors during ciliogenesis in the foetal respiratory epithelium and embryonic left-right organiser of the mouse.	Pubmed	0.0001969	1	0.04706	0.5509	8	68	C1QTNF3,SCG5,CCDC113,MT2A,C9orf24,SPACA9,CREG2,AGTRAP
Pubmed	28340616	Lacking of palladin leads to multiple cellular events changes which contribute to NTD.	Pubmed	0.0002109	1	0.04706	0.5509	6	37	MAP2,SORBS2,NES,CCND1,BCL2,PDLIM1
Pubmed	23209302	KIF14 negatively regulates Rap1a-Radil signaling during breast cancer progression.	Pubmed	0.0002114	1	0.04706	0.5509	5	24	RRAS,NDUFA4,NDUFA9,GNG5,PFKP
Pubmed	16892058	The Rho-GTPase cdc42 regulates neural progenitor fate at the apical surface.	Pubmed	0.0002114	1	0.04706	0.5509	5	24	MAP2,F2RL2,NES,PROM1,CUX2
Pubmed	28671696	Spatiotemporal profile of postsynaptic interactomes integrates components of complex brain disorders.	Pubmed	0.0002239	1	0.04706	0.5509	40	928	TBC1D7,RPS27A,MDK,SORBS2,DLGAP4,SEC31A,PABPC1,PELP1,ZSCAN18,NT5C2,BRSK1,FSCN1,NES,HCN2,NCDN,MTCL1,NPM1,CAMK2B,GRIA3,GRM1,SH3D19,PRAF2,PLA2G15,CLU,HOMER3,SPATA20,ATF6B,RGS6,WTIP,PRKACA,TJAP1,ARHGAP24,DAPK3,KCNJ4,RAB7A,MFN2,EXOG,KLC1,DRG2,FARP1
Pubmed	22681889	The mRNA-bound proteome and its global occupancy profile on protein-coding transcripts.	Pubmed	0.0002391	1	0.04706	0.5509	36	807	RPL27A,MAP4,RPS3,RPS8,RPS10,RPS12,RPS18,RPS27A,NPM3,FAU,H4C8,LLPH,LYAR,PABPC1,NAP1L1,LSM3,STAU1,RPL10A,SUPT5H,EBNA1BP2,TBCA,NPM1,RPUSD4,PCBP2,MKRN2,HMGB2,HMGN2,PFN1,SYF2,ZCRB1,MRPL40,URB1,RBM3,TSFM,MRTO4,RPL5
Pubmed	27107014	An inter-species protein-protein interaction network across vast evolutionary distance.	Pubmed	0.0002459	1	0.04706	0.5509	25	483	MNS1,MIF4GD,TNIP1,GLRX3,FAM214B,NT5C2,SQSTM1,NME1,RBPMS,CAMK2B,TRIM41,CAPN3,PCBD1,ZBED1,UBL7,PPCDC,TFPT,HOMER3,C9orf16,HACL1,FBXL12,AGTRAP,DVL3,APIP,HSD17B14
Pubmed	23792823	Protein isoform-specific validation defines multiple chloride intracellular channel and tropomyosin isoforms as serological biomarkers of ovarian cancer.	Pubmed	0.0002481	1	0.04706	0.5509	3	6	TPM1,TPM3,CLIC1
Pubmed	26060189	Serum proteomic profiling reveals fragments of MYOM3 as potential biomarkers for monitoring the outcome of therapeutic interventions in muscular dystrophies.	Pubmed	0.0002481	1	0.04706	0.5509	3	6	SGCA,SGCG,CAPN3
Pubmed	20167925	Zac1 is an essential transcription factor for cardiac morphogenesis.	Pubmed	0.0002481	1	0.04706	0.5509	3	6	MYL2,NPPA,MYL7
Pubmed	2455687	Vascular smooth muscle calponin. A novel troponin T-like protein.	Pubmed	0.0002481	1	0.04706	0.5509	3	6	ACTA1,TPM1,TPM3
Pubmed	12118070	S100A13 and S100A6 exhibit distinct translocation pathways in endothelial cells.	Pubmed	0.0002481	1	0.04706	0.5509	3	6	S100A1,S100A6,S100A13
Pubmed	19182256	Exploring functional candidate genes for genetic association in german patients with pseudoexfoliation syndrome and pseudoexfoliation glaucoma.	Pubmed	0.0002481	1	0.04706	0.5509	3	6	MFAP2,CLU,LTBP2
Pubmed	12666199	Differential expression of decorin and biglycan genes during palatogenesis in normal and retinoic acid-treated mice.	Pubmed	0.0002481	1	0.04706	0.5509	3	6	BGN,TGFB2,TGFB3
Pubmed	20613589	Elucidating mechanisms of osteogenesis in human adipose-derived stromal cells via microarray analysis.	Pubmed	0.0002481	1	0.04706	0.5509	3	6	TGFB3,IGFBP3,CCN2
Pubmed	27105433	Inhibition of Hb Binding to GP1b? Abrogates Hb-Mediated Thrombus Formation on Immobilized VWF and Collagen under Physiological Shear Stress.	Pubmed	0.0002481	1	0.04706	0.5509	3	6	HBA1,HBA2,HBB
Pubmed	2161834	Smooth muscle calponin. Inhibition of actomyosin MgATPase and regulation by phosphorylation.	Pubmed	0.0002481	1	0.04706	0.5509	3	6	ACTA1,TPM1,TPM3
Pubmed	10620603	The HIV-1 viral protein R induces apoptosis via a direct effect on the mitochondrial permeability transition pore.	Pubmed	0.0002481	1	0.04706	0.5509	3	6	SLC25A5,SLC25A6,BCL2
Pubmed	20408909	Comparison of Iroquois gene expression in limbs/fins of vertebrate embryos.	Pubmed	0.0002481	1	0.04706	0.5509	3	6	IRX6,IRX1,IRX2
Pubmed	21411511	Rhythmic diurnal gene expression in human adipose tissue from individuals who are lean, overweight, and type 2 diabetic.	Pubmed	0.0002481	1	0.04706	0.5509	3	6	PER3,PER2,DBP
Pubmed	23516551	Gadd45g is essential for primary sex determination, male fertility and testis development.	Pubmed	0.0002481	1	0.04706	0.5509	3	6	GADD45B,GADD45G,GADD45A
Pubmed	11090542	Multiple transcriptional domains, with distinct left and right components, in the atrial chambers of the developing heart.	Pubmed	0.0002481	1	0.04706	0.5509	3	6	MYL2,NPPA,MYL7
Pubmed	16861740	Aurothiomalate inhibits transformed growth by targeting the PB1 domain of protein kinase Ciota.	Pubmed	0.0002481	1	0.04706	0.5509	3	6	MAP3K3,SQSTM1,MAP2K5
Pubmed	22908310	Ubiquitylation by Trim32 causes coupled loss of desmin, Z-bands, and thin filaments in muscle atrophy.	Pubmed	0.0002481	1	0.04706	0.5509	3	6	ACTA1,TPM1,DES
Pubmed	24272803	Small leucine-rich proteoglycans exhibit unique spatiotemporal expression profiles during cardiac valve development.	Pubmed	0.0002481	1	0.04706	0.5509	3	6	FMOD,BGN,LUM
Pubmed	10370142	Regulated expression patterns of IRX-2, an Iroquois-class homeobox gene, in the human breast.	Pubmed	0.0002481	1	0.04706	0.5509	3	6	IRX6,IRX1,IRX2
Pubmed	15044949	GADD45beta/GADD45gamma and MEKK4 comprise a genetic pathway mediating STAT4-independent IFNgamma production in T cells.	Pubmed	0.0002481	1	0.04706	0.5509	3	6	GADD45B,GADD45G,GADD45A
Pubmed	18662664	Dissociation of the carbohydrate-binding and splicing activities of galectin-1.	Pubmed	0.0002481	1	0.04706	0.5509	3	6	ACTA1,SLU7,SNRPN
Pubmed	11042145	Organization of mouse Iroquois homeobox genes in two clusters suggests a conserved regulation and function in vertebrate development.	Pubmed	0.0002481	1	0.04706	0.5509	3	6	IRX6,IRX1,IRX2
Pubmed	25771144	A novel phosphorylation site, Serine 199, in the C-terminus of cardiac troponin I regulates calcium sensitivity and susceptibility to calpain-induced proteolysis.	Pubmed	0.0002481	1	0.04706	0.5509	3	6	MYL2,TNNI3,DES
Pubmed	19903815	PB1 domain interaction of p62/sequestosome 1 and MEKK3 regulates NF-kappaB activation.	Pubmed	0.0002481	1	0.04706	0.5509	3	6	MAP3K3,SQSTM1,MAP2K5
Pubmed	24598388	Severe protein aggregate myopathy in a knockout mouse model points to an essential role of cofilin2 in sarcomeric actin exchange and muscle maintenance.	Pubmed	0.0002549	1	0.04706	0.5509	4	14	ACTA1,PFN1,DES,TMEM163
Pubmed	20080568	c-Abl tyrosine kinase regulates cardiac growth and development.	Pubmed	0.0002549	1	0.04706	0.5509	4	14	CCND1,NPPA,IGFBP3,CCN2
Pubmed	15767668	GATA6 is essential for embryonic development of the liver but dispensable for early heart formation.	Pubmed	0.0002592	1	0.04706	0.5509	5	25	ACTA1,FGF1,MYL2,NPPA,MYL7
Pubmed	26100917	Endocardial Brg1 disruption illustrates the developmental origins of semilunar valve disease.	Pubmed	0.0002592	1	0.04706	0.5509	5	25	TGFB2,ENPP2,CTHRC1,IRF6,PLCE1
Pubmed	24595293	Ccm3, a gene associated with cerebral cavernous malformations, is required for neuronal migration.	Pubmed	0.0002592	1	0.04706	0.5509	5	25	MAP2,NES,CUX2,CCN2,TMEM163
Pubmed	21182205	Identification of proteins associated with ligand-activated estrogen receptor ? in human breast cancer cell nuclei by tandem affinity purification and nano LC-MS/MS.	Pubmed	0.0002625	1	0.04706	0.5509	16	245	RPL27A,RPS3,RPS6,RPS8,RPS12,RPS18,SLC25A5,LYAR,PABPC1,PELP1,STAU1,RPL10A,NPM1,AP2M1,MYL6B,RPL5
Pubmed	19578796	Association of genetic variants with chronic kidney disease in individuals with different lipid profiles.	Pubmed	0.0002757	1	0.04706	0.5509	12	152	APOE,CCND1,ABCC8,C1orf122,GNB3,NPPA,THBS4,GYS1,AP2M1,UCP2,CYP2J2,EDNRA
Pubmed	21931791	Defining the molecular character of the developing and adult kidney podocyte.	Pubmed	0.0002844	1	0.04706	0.5509	6	39	GADD45B,NES,GADD45G,NPR3,ARHGAP24,GADD45A
Pubmed	25315684	Repression of rRNA transcription by PARIS contributes to Parkinson's disease.	Pubmed	0.0002865	1	0.04706	0.5509	17	272	RPL27A,RPS6,RPS12,SLC25A5,LYAR,MYL12A,EIF3I,ATP5PO,RPL10A,NPM1,PCCB,TPM1,PDHB,TUFM,AP2M1,MRTO4,RPL5
Pubmed	25037231	Extracellular matrix signatures of human primary metastatic colon cancers and their metastases to liver.	Pubmed	0.0002928	1	0.04706	0.5509	12	153	S100A6,MFAP2,MFAP4,AEBP1,BGN,CBLN1,COL9A1,COL16A1,CSTB,ASPN,LTBP1,LUM
Pubmed	28977666	CHD3 and CHD4 form distinct NuRD complexes with different yet overlapping functionality.	Pubmed	0.0002972	1	0.04706	0.5509	29	605	RPL27A,RPS3,RPS6,RPS8,RPS10,RPS12,RPS18,RPS27A,H4C8,SLC25A5,SLC25A6,SLU7,C7orf50,LYAR,PABPC1,PELP1,SMARCE1,ATP5PO,STAU1,RPL10A,SUPT5H,EBNA1BP2,NPM1,PCBP2,PYCR2,CHD5,RAB7A,MRTO4,RPL5
Pubmed	19851445	High-density SNP screening of the major histocompatibility complex in systemic lupus erythematosus demonstrates strong evidence for independent susceptibility regions.	Pubmed	0.0002997	1	0.04706	0.5509	13	176	RPS18,ATAT1,MRPS18B,UQCC2,ATP6V1G2,MICA,DDR1,DDAH2,PHF1,CLIC1,ATF6B,SNHG32,HSD17B8
Pubmed	23382103	Platelet proteome analysis reveals integrin-dependent aggregation defects in patients with myelodysplastic syndromes.	Pubmed	0.0003147	1	0.04706	0.5509	5	26	MYL9,MYL12A,FIBP,HBB,CLIC1
Pubmed	20381070	Sex-specific proteome differences in the anterior cingulate cortex of schizophrenia.	Pubmed	0.000328	1	0.04706	0.5509	6	40	SNCA,TPM1,TPM3,DDAH1,UCHL1,CRYAB
Pubmed	21529712	Ribosome-mediated specificity in Hox mRNA translation and vertebrate tissue patterning.	Pubmed	0.000329	1	0.04706	0.5509	9	92	RPL27A,RPS3,RPS6,RPS8,RPS10,RPS12,ETV4,RPL10A,RPL5
Pubmed	20473970	Identification of FBXO25-interacting proteins using an integrated proteomics approach.	Pubmed	0.0003292	1	0.04706	0.5509	10	112	RPS8,RPS27A,H2BC21,MYL9,GTF2IRD2,NAP1L1,NPM1,PFKP,TUBA4A,HSPA2
Pubmed	20798045	Ezh2, the histone methyltransferase of PRC2, regulates the balance between self-renewal and differentiation in the cerebral cortex.	Pubmed	0.0003369	1	0.04706	0.5509	7	56	MT2A,B4GALNT1,CPLX1,PFKP,TRNP1,HTRA1,PHF19
Pubmed	27103069	Loss of C9ORF72 impairs autophagy and synergizes with polyQ Ataxin-2 to induce motor neuron dysfunction and cell death.	Pubmed	0.0003369	1	0.04706	0.5509	7	56	RNF126,SQSTM1,RAB12,RAB33A,SNX8,RAB26,PSMD8
Pubmed	20929948	Endothelin receptor type A expression defines a distinct cardiac subdomain within the heart field and is later implicated in chamber myocardium formation.	Pubmed	0.0003411	1	0.04706	0.5509	4	15	NPPA,MYL7,DES,EDNRA
Pubmed	17804598	Long form of latent TGF-beta binding protein 1 (Ltbp1L) is essential for cardiac outflow tract septation and remodeling.	Pubmed	0.0003411	1	0.04706	0.5509	4	15	TGFB2,TGFB3,CCN2,LTBP1
Pubmed	19091769	Prox1 maintains muscle structure and growth in the developing heart.	Pubmed	0.0003411	1	0.04706	0.5509	4	15	ACTN2,MYL2,NPPA,DES
Pubmed	26472242	Muscleblind-like 1 is required for normal heart valve development in vivo.	Pubmed	0.0003411	1	0.04706	0.5509	4	15	BGN,TGFB2,TGFB3,TYRP1
Pubmed	27082860	RNA Directed Modulation of Phenotypic Plasticity in Human Cells.	Pubmed	0.0003411	1	0.04706	0.5509	4	15	RPS10,RPS12,FAU,NPM1
Pubmed	12110673	A functionally active human F1F0 ATPase can be purified by immunocapture from heart tissue and fibroblast cell lines. Subunit structure and activity studies.	Pubmed	0.0003411	1	0.04706	0.5509	4	15	ATP5MG,ATP5ME,ATP5PO,ATP5IF1
Pubmed	17468400	Essential roles of the bHLH transcription factor Hrt2 in repression of atrial gene expression and maintenance of postnatal cardiac function.	Pubmed	0.0003411	1	0.04706	0.5509	4	15	ACTA1,MYL2,NPPA,MYL7
Pubmed	26831064	CHK2-BRCA1 tumor-suppressor axis restrains oncogenic Aurora-A kinase to ensure proper mitotic microtubule assembly.	Pubmed	0.0003437	1	0.04706	0.5509	25	494	RPL27A,MAP4,RPS3,RPS6,RPS8,RPS12,RPS18,FAU,SEC31A,PABPC1,EIF3I,NACA,NAP1L1,STAU1,RPL10A,EBNA1BP2,NME1,NPM1,ZBTB47,MKRN2,PFKP,PFN1,TUBA4A,CLIC1,RPL5
Pubmed	26170170	RC3H1 post-transcriptionally regulates A20 mRNA and modulates the activity of the IKK/NF-?B pathway.	Pubmed	0.0003498	1	0.04706	0.5509	12	156	RPL27A,RPS3,RPS6,RPS8,RPS10,FAU,SLC25A5,EIF3I,STAU1,NPM1,TYRP1,RBM3
Pubmed	28675934	Characterization of the Extracellular Matrix of Normal and Diseased Tissues Using Proteomics.	Pubmed	0.0003736	1	0.04706	0.5509	11	135	S100A6,MFAP2,MFAP4,AEBP1,BGN,CTHRC1,COL16A1,CSTB,ASPN,LTBP1,LUM
Pubmed	26792178	The ubiquitin ligase Ubr4 controls stability of podocin/MEC-2 supercomplexes.	Pubmed	0.0003763	1	0.04706	0.5509	7	57	RPS3,RPS18,SLC25A5,ATP5PO,NDUFA4,TUFM,DLD
Pubmed	12192060	Chondromodulin I is dispensable during enchondral ossification and eye development.	Pubmed	0.0003787	1	0.04706	0.5509	5	27	FGF1,FMOD,TGFB2,TGFB3,COL9A1
Pubmed	21244100	Protein array based interactome analysis of amyloid-? indicates an inhibition of protein translation.	Pubmed	0.0003847	1	0.04706	0.5509	18	305	RPS10,TIGD1,RPS18,ATAT1,DNAJC30,LLPH,C7orf50,ZNF365,CCDC59,ATP5PO,GLRB,POLL,TRIM41,THBS4,PNKD,SPATA4,S1PR1,TTLL7
Pubmed	27107012	Pooled-matrix protein interaction screens using Barcode Fusion Genetics.	Pubmed	0.0003967	1	0.04706	0.5509	22	414	TBC1D7,S100A1,NUDT14,GLRX3,ARL2,MYL2,ATP5PO,CCND1,LSM3,SUPT5H,RBPMS,BORCS8,CYSRT1,TPM3,TFPT,LENG1,PRKACA,GADD45A,DES,RHNO1,FAM133A,HSD17B14
Pubmed	29676259	Mfn2 ubiquitination by PINK1/parkin gates the p97-dependent release of ER from mitochondria to drive mitophagy.	Pubmed	0.000418	1	0.04706	0.5509	9	95	SLC25A5,PABPC1,NDUFA4,NSFL1C,SQSTM1,TUFM,DNAJB2,ATP5MPL,MFN2
Pubmed	27166947	The Chromatin Remodeling Complex Chd4/NuRD Controls Striated Muscle Identity and Metabolic Homeostasis.	Pubmed	0.0004194	1	0.04706	0.5509	7	58	ACTA1,NPPA,HEY1,TNNI3,TNNT1,UCP2,MFN2
Pubmed	27113764	The antiobesity factor WDTC1 suppresses adipogenesis via the CRL4WDTC1 E3 ligase.	Pubmed	0.0004233	1	0.04706	0.5509	22	416	RPL27A,FAU,H2BC21,AEBP1,ATP5PO,NDUFA4,DPM1,BGN,YIF1A,MKRN2,CLIC1,SDF2L1,PYCR2,HSPA2,POLR2E,ZFPL1,ARHGAP24,PSMB2,DAPK3,AK5,NUBP2,ACE2
Pubmed	26930384	Transcriptome of the inner circular smooth muscle of the developing mouse intestine: Evidence for regulation of visceral smooth muscle genes by the hedgehog target gene, cJun.	Pubmed	0.0004237	1	0.04706	0.5509	11	137	MYL9,ADAM19,SMOC2,TSPAN9,TGFB2,TGFB3,THBS4,GAB2,DES,P3H2,LTBP1
Pubmed	17875669	The prepattern transcription factor Irx3 directs nephron segment identity.	Pubmed	0.0004265	1	0.04706	0.5509	3	7	IRX6,IRX1,IRX2
Pubmed	22308401	YAP1, the nuclear target of Hippo signaling, stimulates heart growth through cardiomyocyte proliferation but not hypertrophy.	Pubmed	0.0004265	1	0.04706	0.5509	3	7	MYL2,TNNI3,MYL7
Pubmed	11498536	Oligomerization of human Gadd45a protein.	Pubmed	0.0004265	1	0.04706	0.5509	3	7	GADD45B,GADD45G,GADD45A
Pubmed	19259132	Multilocus analysis of age-related macular degeneration.	Pubmed	0.0004265	1	0.04706	0.5509	3	7	APOE,ARMS2,HTRA1
Pubmed	25816751	HSF1 transcriptional activity is modulated by IER5 and PP2A/B55.	Pubmed	0.0004265	1	0.04706	0.5509	3	7	IER5,HSF1,PPP2R2B
Pubmed	10848613	Developmental expression of latent transforming growth factor beta binding protein 2 and its requirement early in mouse development.	Pubmed	0.0004265	1	0.04706	0.5509	3	7	TGFB2,TGFB3,LTBP2
Pubmed	10973963	Identification of a functional domain in a GADD45-mediated G2/M checkpoint.	Pubmed	0.0004265	1	0.04706	0.5509	3	7	GADD45B,GADD45G,GADD45A
Pubmed	19118250	Disruption of striated preferentially expressed gene locus leads to dilated cardiomyopathy in mice.	Pubmed	0.0004265	1	0.04706	0.5509	3	7	ACTA1,TPM1,DES
Pubmed	20381870	Progression of geographic atrophy and genotype in age-related macular degeneration.	Pubmed	0.0004265	1	0.04706	0.5509	3	7	APOE,ARMS2,HTRA1
Pubmed	9748265	Sequence characteristics, subcellular localization, and substrate specificity of DYRK-related kinases, a novel family of dual specificity protein kinases.	Pubmed	0.0004265	1	0.04706	0.5509	3	7	H2BC21,DYRK4,DYRK1B
Pubmed	12611891	The subunit composition of the human NADH dehydrogenase obtained by rapid one-step immunopurification.	Pubmed	0.0004306	1	0.04706	0.5509	6	42	NDUFA2,NDUFA4,NDUFA9,NDUFA10,NDUFB1,NDUFA11
Pubmed	27576135	Mass spectrometry-based proteomics revealed Glypican-1 as a novel ADAM17 substrate.	Pubmed	0.0004363	1	0.04706	0.5509	10	116	RPL27A,S100A6,NAP1L1,NSFL1C,NPM1,TPM3,CLU,CLIC1,RAB7A,STMN1
Pubmed	15721744	p75NTR--live or let die.	Pubmed	0.0004463	1	0.04706	0.5509	4	16	RPS27A,PSENEN,SQSTM1,UBB
Pubmed	20067919	Activation of Rho GTPases in Smith-Lemli-Opitz syndrome: pathophysiological and clinical implications.	Pubmed	0.0004463	1	0.04706	0.5509	4	16	MYL9,MYL2,PRKACA,STMN1
Pubmed	16494860	MusTRD can regulate postnatal fiber-specific expression.	Pubmed	0.0004463	1	0.04706	0.5509	4	16	MYL2,TNNT1,TPM1,TPM3
Pubmed	26871637	Widespread Expansion of Protein Interaction Capabilities by Alternative Splicing.	Pubmed	0.0004498	1	0.04706	0.5509	33	742	MIF4GD,TNIP1,ACTN2,S100A1,TADA3,SGCA,GLRX3,APOE,VIPAS39,BBS4,DPM1,LSM3,PPIL3,NPM1,RBPMS,CAMK2B,CAPN3,PCBD1,UBL7,TPM1,TPM3,MKRN2,ZNF688,HPS1,PRMT2,PYCR2,HOMER3,CYP11A1,SLC30A2,IVD,DES,AGTRAP,SBDS
Pubmed	29467282	Proteomic profiling of VCP substrates links VCP to K6-linked ubiquitylation and c-Myc function.	Pubmed	0.0004506	1	0.04706	0.5509	52	1353	RPL27A,MAP4,RPS3,USP11,RPS6,RPS8,RPS10,RPS18,NPM3,FAU,RPL22L1,PHLDB3,SLC25A5,SLU7,CHCHD6,SEC31A,LYAR,PABPC1,EIF3I,FSCN1,NES,NACA,NAP1L1,NARS1,NDUFA9,DPM1,STAU1,RPL10A,NSFL1C,SQSTM1,EBNA1BP2,NPM1,POLR1E,TPM3,PDHB,PFKP,PFN1,TUBA4A,TUFM,AP2M1,AP2S1,CLIC1,PYCR2,POLR2E,PSMB2,URB1,RAB7A,HSPB8,SAE1,SBDS,MRTO4,RPL5
Pubmed	18587394	Genome-wide association defines more than 30 distinct susceptibility loci for Crohn's disease.	Pubmed	0.0004522	1	0.04706	0.5509	5	28	GATD3A,ZNF365,IRF1-AS1,JAK2,ORMDL3
Pubmed	19334288	Three-dimensional visualization of testis cord morphogenesis, a novel tubulogenic mechanism in development.	Pubmed	0.0004594	1	0.04706	0.5509	13	184	MFAP2,MFAP4,MYL9,ADAM19,SMOC2,ELOB,COL9A1,NDUFA11,HTRA1,DDT,SAE1,ACE2,LTBP1
Pubmed	30409884	WDFY4 is required for cross-presentation in response to viral and tumor antigens.	Pubmed	0.0004792	1	0.04706	0.5509	11	139	RPS27A,PABPC1,NT5C2,THY1,TPM1,TPM3,MYL6B,CLNS1A,HSPA2,PSMD8,LSP1
Pubmed	27559042	Glycoproteomics Reveals Decorin Peptides With Anti-Myostatin Activity in Human Atrial Fibrillation.	Pubmed	0.0004877	1	0.04706	0.5509	9	97	FMOD,APOE,MSTN,BGN,NPPA,CLU,ASPN,LTBP2,LUM
Pubmed	23754746	Epigenetic functions of smchd1 repress gene clusters on the inactive X chromosome and on autosomes.	Pubmed	0.0004906	1	0.04706	0.5509	6	43	C1QTNF3,SNRPN,TMEM126B,EDA2R,RAB33A,TMEM163
Pubmed	23333304	CBF? stabilizes HIV Vif to counteract APOBEC3 at the expense of RUNX1 target gene expression.	Pubmed	0.0005202	1	0.04706	0.5509	12	163	MNS1,F2RL2,IL31RA,RND3,FSCN1,SOCS2,GLRB,ELOB,RUNX2,ATP1B4,ICA1,S1PR1
Pubmed	28705898	Cellular heterogeneity in the ureteric progenitor niche and distinct profiles of branching morphogenesis in organ development.	Pubmed	0.0005343	1	0.04706	0.5509	10	119	RPS3,ETV4,MDK,SLC27A6,P3H3,CCND1,SOCS2,SERPINE2,PCBP4,STMN1
Pubmed	30320934	The polyproline-motif of S6K2: eIF5A translational dependence and importance for protein-protein interactions.	Pubmed	0.0005568	1	0.04706	0.5509	6	44	RPS3,RPS6,RPS8,RPS18,PABPC1,RPL10A
Pubmed	23455924	A Y2H-seq approach defines the human protein methyltransferase interactome.	Pubmed	0.0005644	1	0.04706	0.5509	19	342	MNS1,TADA3,KLF15,SLU7,SHLD1,MYL12A,CCDC113,MT2A,CCDC74A,OGDHL,LCA5L,PEX7,PRMT2,TSACC,ZNF57,DNTTIP1,DCAF8,PHF19,JMJD4
Pubmed	1474216	Amino acid limitation and flow to the duodenum at four stages of lactation. 2. Extent of lysine limitation.	Pubmed	0.0005696	1	0.04706	0.5509	2	2	MAP3K3,HSPA2
Pubmed	29696364	Differential somatostatin, CXCR4 chemokine and endothelin A receptor expression in WHO grade I-IV astrocytic brain tumors.	Pubmed	0.0005696	1	0.04706	0.5509	2	2	CXCR4,EDNRA
Pubmed	26842067	Changes in the expression of the human adenine nucleotide translocase isoforms condition cellular metabolic/proliferative status.	Pubmed	0.0005696	1	0.04706	0.5509	2	2	SLC25A5,SLC25A6
Pubmed	19542206	Potential role of alpha-synuclein and metallothionein in lead-induced inclusion body formation.	Pubmed	0.0005696	1	0.04706	0.5509	2	2	MT2A,SNCA
Pubmed	18026953	Coinheritance of the different copy numbers of alpha-globin gene modifies severity of beta-thalassemia/Hb E disease.	Pubmed	0.0005696	1	0.04706	0.5509	2	2	HBA2,HBB
Pubmed	23590659	Diagnostic testing for ?-globin gene disorders in a heterogeneous North American population.	Pubmed	0.0005696	1	0.04706	0.5509	2	2	HBA1,HBA2
Pubmed	1975428	A truncated human chromosome 16 associated with alpha thalassaemia is stabilized by addition of telomeric repeat (TTAGGG)n.	Pubmed	0.0005696	1	0.04706	0.5509	2	2	HBA1,HBA2
Pubmed	21557918	Abnormal expression of uncoupling protein-2 correlates with CYP11A1 expression in polycystic ovary syndrome.	Pubmed	0.0005696	1	0.04706	0.5509	2	2	UCP2,CYP11A1
Pubmed	27503167	Development of myotendinous-like junctions that anchor cardiac valves requires fibromodulin and lumican.	Pubmed	0.0005696	1	0.04706	0.5509	2	2	FMOD,LUM
Pubmed	6452630	Cloning and complete nucleotide sequence of human 5'-alpha-globin gene.	Pubmed	0.0005696	1	0.04706	0.5509	2	2	HBA1,HBA2
Pubmed	26316481	The Hematological and Molecular Spectrum of ?-Thalassemias in Turkey: The Hacettepe Experience.	Pubmed	0.0005696	1	0.04706	0.5509	2	2	HBA1,HBA2
Pubmed	21075281	Protein quality control during erythropoiesis and hemoglobin synthesis.	Pubmed	0.0005696	1	0.04706	0.5509	2	2	HBA1,HBB
Pubmed	17394396	Molecular analysis of alpha/beta-thalassemia in a southern Chinese population.	Pubmed	0.0005696	1	0.04706	0.5509	2	2	HBA1,HBB
Pubmed	28432083	Optimal CD4 T cell priming after LPS-based adjuvanticity with CD134 costimulation relies on CXCL9 production.	Pubmed	0.0005696	1	0.04706	0.5509	2	2	CXCL9,TNFRSF4
Pubmed	22738435	Identification and characterization of two novel and differentially expressed isoforms of human ?2- and ?1-globin genes.	Pubmed	0.0005696	1	0.04706	0.5509	2	2	HBA1,HBA2
Pubmed	10728394	Expression of secreted frizzled related proteins 3 and 4 in human ventricular myocardium correlates with apoptosis related gene expression.	Pubmed	0.0005696	1	0.04706	0.5509	2	2	SFRP4,FRZB
Pubmed	23497290	Growth factor receptor-Src-mediated suppression of GRK6 dysregulates CXCR4 signaling and promotes medulloblastoma migration.	Pubmed	0.0005696	1	0.04706	0.5509	2	2	GRK6,CXCR4
Pubmed	1375903	Expression of transforming growth factor-beta isoforms (beta 2 and beta 3) in the mouse uterus: analysis of the periimplantation period and effects of ovarian steroids.	Pubmed	0.0005696	1	0.04706	0.5509	2	2	TGFB2,TGFB3
Pubmed	15017020	Atrial natriuretic peptide gene polymorphisms and risk of ischemic stroke in humans.	Pubmed	0.0005696	1	0.04706	0.5509	2	2	NPPA,NPR3
Pubmed	23420843	A periodic pattern of evolutionarily conserved basic and acidic residues constitutes the binding interface of actin-tropomyosin.	Pubmed	0.0005696	1	0.04706	0.5509	2	2	ACTA1,TPM1
Pubmed	11076963	Differential expression of lumican and fibromodulin regulate collagen fibrillogenesis in developing mouse tendons.	Pubmed	0.0005696	1	0.04706	0.5509	2	2	FMOD,LUM
Pubmed	12089156	A syndrome of joint laxity and impaired tendon integrity in lumican- and fibromodulin-deficient mice.	Pubmed	0.0005696	1	0.04706	0.5509	2	2	FMOD,LUM
Pubmed	19261853	Membrane-associated farnesylated UCH-L1 promotes alpha-synuclein neurotoxicity and is a therapeutic target for Parkinson's disease.	Pubmed	0.0005696	1	0.04706	0.5509	2	2	SNCA,UCHL1
Pubmed	16170381	Hematopoietic cells from Gadd45a- and Gadd45b-deficient mice are sensitized to genotoxic-stress-induced apoptosis.	Pubmed	0.0005696	1	0.04706	0.5509	2	2	GADD45B,GADD45A
Pubmed	27076484	The Association Between Clusterin and APOE Polymorphisms and Late-Onset Alzheimer Disease in a Turkish Cohort.	Pubmed	0.0005696	1	0.04706	0.5509	2	2	APOE,CLU
Pubmed	10691782	Intracellular localization of dimethylarginine dimethylaminohydrolase overexpressed in an endothelial cell line.	Pubmed	0.0005696	1	0.04706	0.5509	2	2	DDAH2,DDAH1
Pubmed	23073173	Bicalutamide-induced hypoxia potentiates RUNX2-mediated Bcl-2 expression resulting in apoptosis resistance.	Pubmed	0.0005696	1	0.04706	0.5509	2	2	BCL2,RUNX2
Pubmed	16636063	Gadd45a and Gadd45b protect hematopoietic cells from UV-induced apoptosis via distinct signaling pathways, including p38 activation and JNK inhibition.	Pubmed	0.0005696	1	0.04706	0.5509	2	2	GADD45B,GADD45A
Pubmed	12478370	Tgfbeta2 -/- Tgfbeta3 -/- double knockout mice display severe midline fusion defects and early embryonic lethality.	Pubmed	0.0005696	1	0.04706	0.5509	2	2	TGFB2,TGFB3
Pubmed	16508779	High glucose alters the expression of genes involved in proliferation and cell-fate specification of embryonic neural stem cells.	Pubmed	0.0005696	1	0.04706	0.5509	2	2	MAP2,NES
Pubmed	29168665	The clinicopathological parameters significance of CD133 and Nestin in epithelial ovarian cancer: a meta-analysis.	Pubmed	0.0005696	1	0.04706	0.5509	2	2	NES,PROM1
Pubmed	11106625	Alteration of tropomyosin function and folding by a nemaline myopathy-causing mutation.	Pubmed	0.0005696	1	0.04706	0.5509	2	2	ACTA1,TPM3
Pubmed	25261684	Protease activated receptor-1 mediates cytotoxicity during ischemia using in vivo and in vitro models.	Pubmed	0.0005696	1	0.04706	0.5509	2	2	F2R,F2RL2
Pubmed	19688743	Gadd45b and Gadd45g are important for anti-tumor immune responses.	Pubmed	0.0005696	1	0.04706	0.5509	2	2	GADD45B,GADD45G
Pubmed	8058338	Protein kinase A phosphorylates cyclin D1 at three distinct sites within the cyclin box and at the C-terminus.	Pubmed	0.0005696	1	0.04706	0.5509	2	2	CCND1,PRKACA
Pubmed	23739922	Protease-activated receptors (PAR)-1 and -3 drive epithelial-mesenchymal transition of alveolar epithelial cells - potential role in lung fibrosis.	Pubmed	0.0005696	1	0.04706	0.5509	2	2	F2R,F2RL2
Pubmed	26516203	The role of adipose tissue asymmetric dimethylarginine/dimethylarginine dimethylaminohydrolase pathway in adipose tissue phenotype and metabolic abnormalities in subtotally nephrectomized rats.	Pubmed	0.0005696	1	0.04706	0.5509	2	2	DDAH2,DDAH1
Pubmed	25082878	Ser70 phosphorylation of Bcl-2 by selective tyrosine nitration of PP2A-B56? stabilizes its antiapoptotic activity.	Pubmed	0.0005696	1	0.04706	0.5509	2	2	BCL2,PPP2R2B
Pubmed	25027842	LincRNAs MONC and MIR100HG act as oncogenes in acute megakaryoblastic leukemia.	Pubmed	0.0005696	1	0.04706	0.5509	2	2	MIR100HG,MIR99AHG
Pubmed	6244294	Nucleotide sequence of the coding portion of human alpha globin messenger RNA.	Pubmed	0.0005696	1	0.04706	0.5509	2	2	HBA1,HBA2
Pubmed	1695131	Chromosomal localization of two human genes inducible by interferons, double-stranded RNA, and viruses.	Pubmed	0.0005696	1	0.04706	0.5509	2	2	IFI6,ISG15
Pubmed	8641565	Effects of calcium-binding proteins (S-100a(o), S-100a, S-100b) on desmin assembly in vitro.	Pubmed	0.0005696	1	0.04706	0.5509	2	2	S100A1,DES
Pubmed	25194333	Relationship between dimethylarginine dimethylaminohydrolase gene variants and asymmetric dimethylarginine in patients with rheumatoid arthritis.	Pubmed	0.0005696	1	0.04706	0.5509	2	2	DDAH2,DDAH1
Pubmed	18769447	SOCS2: inhibitor of JAK2V617F-mediated signal transduction.	Pubmed	0.0005696	1	0.04706	0.5509	2	2	SOCS2,JAK2
Pubmed	11158204	Regulation of Bcl2 phosphorylation and potential significance for leukemic cell chemoresistance.	Pubmed	0.0005696	1	0.04706	0.5509	2	2	BCL2,PRKACA
Pubmed	17237936	Mutant ubiquitin and p62 immunoreactivity in cases of combined multiple system atrophy and Alzheimer's disease.	Pubmed	0.0005696	1	0.04706	0.5509	2	2	SQSTM1,UBB
Pubmed	16920729	Dimethylarginine dimethylaminohydrolase (DDAH) regulates trophoblast invasion and motility through effects on nitric oxide.	Pubmed	0.0005696	1	0.04706	0.5509	2	2	DDAH2,DDAH1
Pubmed	22619176	Central role of mitofusin 2 in autophagosome-lysosome fusion in cardiomyocytes.	Pubmed	0.0005696	1	0.04706	0.5509	2	2	MYL2,MFN2
Pubmed	21931690	Upregulation of hemoglobin expression by oxidative stress in hepatocytes and its implication in nonalcoholic steatohepatitis.	Pubmed	0.0005696	1	0.04706	0.5509	2	2	HBA1,HBB
Pubmed	16129693	S100A1 enhances the L-type Ca2+ current in embryonic mouse and neonatal rat ventricular cardiomyocytes.	Pubmed	0.0005696	1	0.04706	0.5509	2	2	S100A1,PRKACA
Pubmed	25772936	Mutations in the endothelin receptor type A cause mandibulofacial dysostosis with alopecia.	Pubmed	0.0005696	1	0.04706	0.5509	2	2	EDN3,EDNRA
Pubmed	27837619	Expression of Nestin and CD133 in serous ovarian carcinoma.	Pubmed	0.0005696	1	0.04706	0.5509	2	2	NES,PROM1
Pubmed	18853460	Common variation in GRB-associated Binding Protein 2 (GAB2) and increased risk for Alzheimer dementia.	Pubmed	0.0005696	1	0.04706	0.5509	2	2	APOE,GAB2
Pubmed	15837514	The design of coiled-coil structures and assemblies.	Pubmed	0.0005696	1	0.04706	0.5509	2	2	CCDC74A,CCDC168
Pubmed	10493931	Identification of two human dimethylarginine dimethylaminohydrolases with distinct tissue distributions and homology with microbial arginine deiminases.	Pubmed	0.0005696	1	0.04706	0.5509	2	2	DDAH2,DDAH1
Pubmed	17033963	Distinct clinical phenotypes associated with a mutation in the mitochondrial translation elongation factor EFTs.	Pubmed	0.0005696	1	0.04706	0.5509	2	2	TUFM,TSFM
Pubmed	7615398	Hb Anamosa or alpha 2(111)(G18)Ala-->Val beta 2 (alpha 2 mutation) and Hb Mulhacen or alpha 2(123)(H6)Ala-->Ser beta 2 (alpha 1 mutation) are two silent, stable variants detected by sequencing of amplified DNA.	Pubmed	0.0005696	1	0.04706	0.5509	2	2	HBA1,HBA2
Pubmed	28883619	Tertiary and quaternary structural basis of oxygen affinity in human hemoglobin as revealed by multiscale simulations.	Pubmed	0.0005696	1	0.04706	0.5509	2	2	HBA1,HBB
Pubmed	19491722	Analyses of single nucleotide polymorphisms and haplotype linkage of LOC387715 and the HTRA1 gene in exudative age-related macular degeneration in a Chinese cohort.	Pubmed	0.0005696	1	0.04706	0.5509	2	2	ARMS2,HTRA1
Pubmed	10192392	Interacting loci cause severe iris atrophy and glaucoma in DBA/2J mice.	Pubmed	0.0005696	1	0.04706	0.5509	2	2	GPNMB,TYRP1
Pubmed	11978731	Abnormal collagen fibrils in tendons of biglycan/fibromodulin-deficient mice lead to gait impairment, ectopic ossification, and osteoarthritis.	Pubmed	0.0005696	1	0.04706	0.5509	2	2	FMOD,BGN
Pubmed	20302621	Ubiquitin carboxy-terminal hydrolase L1 (UCHL1) S18Y polymorphism in Alzheimer's disease.	Pubmed	0.0005696	1	0.04706	0.5509	2	2	APOE,UCHL1
Pubmed	20888920	Association between GAB2 haplotype and higher glucose metabolism in Alzheimer's disease-affected brain regions in cognitively normal APOE?4 carriers.	Pubmed	0.0005696	1	0.04706	0.5509	2	2	APOE,GAB2
Pubmed	2037305	The mouse polycystic kidney disease mutation (cpk) is located on proximal chromosome 12.	Pubmed	0.0005696	1	0.04706	0.5509	2	2	CYS1,ODC1
Pubmed	8980683	The crystal structure of horse deoxyhaemoglobin trapped in the high-affinity (R) state.	Pubmed	0.0005696	1	0.04706	0.5509	2	2	HBA2,HBB
Pubmed	19359777	Microcytic hypochromic anemia patients with thalassemia: genotyping approach.	Pubmed	0.0005696	1	0.04706	0.5509	2	2	HBA1,HBB
Pubmed	20298684	No association of the C>T polymorphism that is located 1385 upstream from initial code of fibroblast growth factor 1 gene with Alzheimer's disease in Chinese.	Pubmed	0.0005696	1	0.04706	0.5509	2	2	FGF1,APOE
Pubmed	10861853	Interaction of hCLIM1, an enigma family protein, with alpha-actinin 2.	Pubmed	0.0005696	1	0.04706	0.5509	2	2	ACTN2,PDLIM1
Pubmed	17933965	Dimethylarginine dimethylaminohydrolase (DDAH): expression, regulation, and function in the cardiovascular and renal systems.	Pubmed	0.0005696	1	0.04706	0.5509	2	2	DDAH2,DDAH1
Pubmed	18049952	Disease-related quantitation of TGF-beta3 in human aqueous humor.	Pubmed	0.0005696	1	0.04706	0.5509	2	2	TGFB2,TGFB3
Pubmed	11790768	Phosphorylation-dependent functional coupling of hSlo calcium-dependent potassium channel and its hbeta 4 subunit.	Pubmed	0.0005696	1	0.04706	0.5509	2	2	KCNMB4,KCNMB1
Pubmed	19436308	The prolyl 3-hydroxylases P3H2 and P3H3 are novel targets for epigenetic silencing in breast cancer.	Pubmed	0.0005696	1	0.04706	0.5509	2	2	P3H3,P3H2
Pubmed	18776740	Autophagy-independent incorporation of GFP-LC3 into protein aggregates is dependent on its interaction with p62/SQSTM1.	Pubmed	0.0005696	1	0.04706	0.5509	2	2	SQSTM1,GABARAPL2
Pubmed	19065273	Sequence variants in HTRA1 and LOC387715/ARMS2 and phenotype and response to photodynamic therapy in neovascular age-related macular degeneration in populations from Israel.	Pubmed	0.0005696	1	0.04706	0.5509	2	2	ARMS2,HTRA1
Pubmed	17724704	Mutations and polymorphisms in hemoglobin genes and the risk of pulmonary hypertension and death in sickle cell disease.	Pubmed	0.0005696	1	0.04706	0.5509	2	2	HBA1,HBB
Pubmed	25672610	Evidence of CD90+CXCR4+ cells as circulating tumor stem cells in hepatocellular carcinoma.	Pubmed	0.0005696	1	0.04706	0.5509	2	2	THY1,CXCR4
Pubmed	1177322	Three-dimensional fourier synthesis of human deoxyhaemoglobin at 2-5 A resolution: refinement of the atomic model.	Pubmed	0.0005696	1	0.04706	0.5509	2	2	HBA1,HBB
Pubmed	18200037	NPM1-mutated acute myeloid leukaemia occurring in JAK2-V617F+ primary myelofibrosis: de-novo origin?	Pubmed	0.0005696	1	0.04706	0.5509	2	2	NPM1,JAK2
Pubmed	29991527	Promotes Invasion through a 3'-Hairpin Structure and Associates with Prognosis in Glioblastoma.	Pubmed	0.0005696	1	0.04706	0.5509	2	2	MIR4435-2HG,CYTOR
Pubmed	2752146	Locus assignment of two alpha-globin structural mutants from the Caribbean basin: alpha Fort de France (alpha 45 Arg) and alpha Spanish Town (alpha 27 Val).	Pubmed	0.0005696	1	0.04706	0.5509	2	2	HBA1,HBA2
Pubmed	14988150	The sphingosine 1-phosphate receptor agonist FTY720 supports CXCR4-dependent migration and bone marrow homing of human CD34+ progenitor cells.	Pubmed	0.0005696	1	0.04706	0.5509	2	2	CXCR4,S1PR1
Pubmed	21252205	Risk- and non-risk-associated variants at the 10q26 AMD locus influence ARMS2 mRNA expression but exclude pathogenic effects due to protein deficiency.	Pubmed	0.0005696	1	0.04706	0.5509	2	2	ARMS2,HTRA1
Pubmed	28981549	Retinal pathology in the PPCD1 mouse.	Pubmed	0.0005696	1	0.04706	0.5509	2	2	GPNMB,TYRP1
Pubmed	20359253	Effect of the common -866G/A polymorphism of the uncoupling protein 2 gene on weight loss and body composition under sibutramine therapy in an obese Taiwanese population.	Pubmed	0.0005696	1	0.04706	0.5509	2	2	GNB3,UCP2
Pubmed	11884745	Molecular chaperones in the cytosol: from nascent chain to folded protein.	Pubmed	0.0005696	1	0.04706	0.5509	2	2	PFDN1,PFDN4
Pubmed	23202368	Fibromodulin deficiency reduces low-density lipoprotein accumulation in atherosclerotic plaques in apolipoprotein E-null mice.	Pubmed	0.0005696	1	0.04706	0.5509	2	2	FMOD,APOE
Pubmed	8227090	In vitro chamber specification during embryonic stem cell cardiogenesis. Expression of the ventricular myosin light chain-2 gene is independent of heart tube formation.	Pubmed	0.0005696	1	0.04706	0.5509	2	2	MYL2,NPPA
Pubmed	19262956	GAB2 gene does not modify the risk of Alzheimer's disease in Spanish APOE 4 carriers.	Pubmed	0.0005696	1	0.04706	0.5509	2	2	APOE,GAB2
Pubmed	22693641	ACE2 deficiency enhances angiotensin II-mediated aortic profilin-1 expression, inflammation and peroxynitrite production.	Pubmed	0.0005696	1	0.04706	0.5509	2	2	PFN1,ACE2
Pubmed	4550395	Multiple alpha chain loci for human haemoglobins: Hb J-Buda and Hb G-Pest.	Pubmed	0.0005696	1	0.04706	0.5509	2	2	HBA1,HBA2
Pubmed	26888934	Impaired Dendritic Development and Memory in Sorbs2 Knock-Out Mice.	Pubmed	0.0005696	1	0.04706	0.5509	2	2	SORBS2,TMEM163
Pubmed	2169733	Isolation and functional expression of the human atrial natriuretic peptide clearance receptor cDNA.	Pubmed	0.0005696	1	0.04706	0.5509	2	2	NPPA,NPR3
Pubmed	16732331	Hematopoietic cells from gadd45a-deficient and gadd45b-deficient mice exhibit impaired stress responses to acute stimulation with cytokines, myeloablation and inflammation.	Pubmed	0.0005696	1	0.04706	0.5509	2	2	GADD45B,GADD45A
Pubmed	21917603	Role of subchondral bone during early-stage experimental TMJ osteoarthritis.	Pubmed	0.0005696	1	0.04706	0.5509	2	2	FMOD,BGN
Pubmed	30146452	Intranasal carnosine attenuates transcriptomic alterations and improves mitochondrial function in the Thy1-aSyn mouse model of Parkinson's disease.	Pubmed	0.0005696	1	0.04706	0.5509	2	2	SNCA,THY1
Pubmed	19253527	[Expression of OX40 and Bcl-2 in allergic rhinitis].	Pubmed	0.0005696	1	0.04706	0.5509	2	2	BCL2,TNFRSF4
Pubmed	25967234	Do relevant markers of cancer stem cells CD133 and Nestin indicate a poor prognosis in glioma patients? A systematic review and meta-analysis.	Pubmed	0.0005696	1	0.04706	0.5509	2	2	NES,PROM1
Pubmed	30795802	Association of HTRA1 and ARMS2 gene polymorphisms with response to intravitreal ranibizumab among neovascular age-related macular degenerative subjects.	Pubmed	0.0005696	1	0.04706	0.5509	2	2	ARMS2,HTRA1
Pubmed	14741101	ApoE and clusterin cooperatively suppress Abeta levels and deposition: evidence that ApoE regulates extracellular Abeta metabolism in vivo.	Pubmed	0.0005696	1	0.04706	0.5509	2	2	APOE,CLU
Pubmed	8624078	Morphological, biochemical, and genetic support for an apolipoprotein E effect on microtubular metabolism.	Pubmed	0.0005696	1	0.04706	0.5509	2	2	MAP2,APOE
Pubmed	16247030	Retinal ganglion cell degeneration is topological but not cell type specific in DBA/2J mice.	Pubmed	0.0005696	1	0.04706	0.5509	2	2	GPNMB,TYRP1
Pubmed	18988889	Brief report: increased apoptosis in advanced atherosclerotic lesions of Apoe-/- mice lacking macrophage Bcl-2.	Pubmed	0.0005696	1	0.04706	0.5509	2	2	APOE,BCL2
Pubmed	31171699	GADD45 promotes locus-specific DNA demethylation and 2C cycling in embryonic stem cells.	Pubmed	0.0005696	1	0.04706	0.5509	2	2	GADD45B,GADD45A
Pubmed	18838000	Inhibition of G1P3 expression found in the differential display study on respiratory syncytial virus infection.	Pubmed	0.0005696	1	0.04706	0.5509	2	2	IFI6,DNAAF5
Pubmed	16612079	Mice deficient in biglycan and fibromodulin as a model for temporomandibular joint osteoarthritis.	Pubmed	0.0005696	1	0.04706	0.5509	2	2	FMOD,BGN
Pubmed	26172285	Sur1-Trpm4 Cation Channel Expression in Human Cerebral Infarcts.	Pubmed	0.0005696	1	0.04706	0.5509	2	2	ABCC8,TRPM4
Pubmed	1864465	The SGP-2 gene is developmentally regulated in the mouse kidney and abnormally expressed in collecting duct cysts in polycystic kidney disease.	Pubmed	0.0005696	1	0.04706	0.5509	2	2	CYS1,CLU
Pubmed	27734361	Gene Expression Analysis of CCN Proteins: Whole-Mount In Situ Hybridization of Ccn2 in Developing Calcified Tissues.	Pubmed	0.0005696	1	0.04706	0.5509	2	2	RUNX2,CCN2
Pubmed	12122004	Crystal structure of horse carbonmonoxyhemoglobin-bezafibrate complex at 1.55-A resolution. A novel allosteric binding site in R-state hemoglobin.	Pubmed	0.0005696	1	0.04706	0.5509	2	2	HBA2,HBB
Pubmed	19288145	Linking conformation change to hemoglobin activation via chain-selective time-resolved resonance Raman spectroscopy of protoheme/mesoheme hybrids.	Pubmed	0.0005696	1	0.04706	0.5509	2	2	HBA1,HBB
Pubmed	18772456	G6PD deficiency, absence of alpha-thalassemia, and hemolytic rate at baseline are significant independent risk factors for abnormally high cerebral velocities in patients with sickle cell anemia.	Pubmed	0.0005696	1	0.04706	0.5509	2	2	HBA1,HBB
Pubmed	19293329	New Zealand Ginger mouse: novel model that associates the tyrp1b pigmentation gene locus with regulation of lean body mass.	Pubmed	0.0005696	1	0.04706	0.5509	2	2	ASIP,TYRP1
Pubmed	21453125	Vascular gene polymorphisms (EDNRA -231 G>A and APOE HhaI) and risk for migraine.	Pubmed	0.0005696	1	0.04706	0.5509	2	2	APOE,EDNRA
Pubmed	25519903	HTRA1 (high temperature requirement A serine peptidase 1) gene is transcriptionally regulated by insertion/deletion nucleotides located at the 3' end of the ARMS2 (age-related maculopathy susceptibility 2) gene in patients with age-related macular degeneration.	Pubmed	0.0005696	1	0.04706	0.5509	2	2	ARMS2,HTRA1
Pubmed	26464626	Expression of alpha B crystallin and BCL2 in patients with infiltrating ductal carcinoma.	Pubmed	0.0005696	1	0.04706	0.5509	2	2	BCL2,CRYAB
Pubmed	23300799	p62/SQSTM1-dependent autophagy of Lewy body-like ?-synuclein inclusions.	Pubmed	0.0005696	1	0.04706	0.5509	2	2	SNCA,SQSTM1
Pubmed	6726807	The crystal structure of human deoxyhaemoglobin at 1.74 A resolution.	Pubmed	0.0005696	1	0.04706	0.5509	2	2	HBA2,HBB
Pubmed	17027650	Thrombin induces rapid PAR1-mediated non-classical FGF1 release.	Pubmed	0.0005696	1	0.04706	0.5509	2	2	F2R,FGF1
Pubmed	9783148	Functional and morphological examination of ganglionic and aganglionic distal gut from the lethal spotted mouse.	Pubmed	0.0005696	1	0.04706	0.5509	2	2	ASIP,EDN3
Pubmed	22985576	[Microtubule-associated protein 2 and nestin expressions in human embryonic and fetal gastric tissues].	Pubmed	0.0005696	1	0.04706	0.5509	2	2	MAP2,NES
Pubmed	25735755	Lyar Is a New Ligand for Retinal Pigment Epithelial Phagocytosis.	Pubmed	0.0005696	1	0.04706	0.5509	2	2	LYAR,RAB7A
Pubmed	20664794	Age-related macular degeneration-associated variants at chromosome 10q26 do not significantly alter ARMS2 and HTRA1 transcript levels in the human retina.	Pubmed	0.0005696	1	0.04706	0.5509	2	2	ARMS2,HTRA1
Pubmed	12360531	Allosteric effects of chloride ions at the intradimeric alpha1beta1 and alpha2beta2 interfaces of human hemoglobin.	Pubmed	0.0005696	1	0.04706	0.5509	2	2	HBA2,HBB
Pubmed	10335655	Molecular evolution of the COX7A gene family in primates.	Pubmed	0.0005696	1	0.04706	0.5509	2	2	COX7A2L,COX7A1
Pubmed	22319455	The mitochondrial chaperone protein TRAP1 mitigates ?-Synuclein toxicity.	Pubmed	0.0005696	1	0.04706	0.5509	2	2	SNCA,TRAP1
Pubmed	12496757	Mutations in SBDS are associated with Shwachman-Diamond syndrome.	Pubmed	0.0005696	1	0.04706	0.5509	2	2	SBDSP1,SBDS
Pubmed	11369455	Immature ovaries and polycystic kidneys in the congenital polycystic kidney mouse may be due to abnormal sex steroid metabolism.	Pubmed	0.0005696	1	0.04706	0.5509	2	2	CYS1,HSD17B8
Pubmed	16982684	Role of the cyclic AMP response element in the bcl-2 promoter in the regulation of endogenous Bcl-2 expression and apoptosis in murine B cells.	Pubmed	0.0005696	1	0.04706	0.5509	2	2	BCL2,TMEM163
Pubmed	25222045	Characterization of two unique ?-globin gene cluster deletions causing ?-thalassemia in Israeli Arabs.	Pubmed	0.0005696	1	0.04706	0.5509	2	2	HBA1,HBA2
Pubmed	20716950	BCL2 interaction with actin in vitro may inhibit cell motility by enhancing actin polymerization.	Pubmed	0.0005696	1	0.04706	0.5509	2	2	ACTA1,BCL2
Pubmed	18699990	Tetratricopeptide repeat domain 9A is an interacting protein for tropomyosin Tm5NM-1.	Pubmed	0.0005696	1	0.04706	0.5509	2	2	TTC9,TPM3
Pubmed	23450268	Homeostatic and circadian contribution to EEG and molecular state variables of sleep regulation.	Pubmed	0.0005696	1	0.04706	0.5509	2	2	PER2,DBP
Pubmed	11410421	Alpha2(CD31 AGG-->AAG, Arg-->Lys) causing non-deletional alpha-thalassemia in a Chinese family with HbH disease.	Pubmed	0.0005696	1	0.04706	0.5509	2	2	HBA1,HBA2
Pubmed	20197038	The interaction of alphaB-crystallin with mature alpha-synuclein amyloid fibrils inhibits their elongation.	Pubmed	0.0005696	1	0.04706	0.5509	2	2	SNCA,CRYAB
Pubmed	28222108	Oxidative stress-mediated NF?B phosphorylation upregulates p62/SQSTM1 and promotes retinal pigmented epithelial cell survival through increased autophagy.	Pubmed	0.0005696	1	0.04706	0.5509	2	2	APOE,SQSTM1
Pubmed	23874396	TdIF1 recognizes a specific DNA sequence through its Helix-Turn-Helix and AT-hook motifs to regulate gene transcription.	Pubmed	0.0005696	1	0.04706	0.5509	2	2	RAB20,DNTTIP1
Pubmed	1498330	Bcl-2 initiates a new category of oncogenes: regulators of cell death.	Pubmed	0.0005696	1	0.04706	0.5509	2	2	S100A6,BCL2
Pubmed	27011731	Iris transillumination defect and its gene modulators do not correlate with intraocular pressure in the BXD family of mice.	Pubmed	0.0005696	1	0.04706	0.5509	2	2	GPNMB,TYRP1
Pubmed	20080971	Distal histidine stabilizes bound O2 and acts as a gate for ligand entry in both subunits of adult human hemoglobin.	Pubmed	0.0005696	1	0.04706	0.5509	2	2	HBA1,HBB
Pubmed	16675913	Expression of the antiapoptotic proteins clusterin and bcl-2 in laryngeal squamous cell carcinomas.	Pubmed	0.0005696	1	0.04706	0.5509	2	2	BCL2,CLU
Pubmed	17553421	GAB2 alleles modify Alzheimer's risk in APOE epsilon4 carriers.	Pubmed	0.0005696	1	0.04706	0.5509	2	2	APOE,GAB2
Pubmed	21666141	Locked nucleic acid probes for enhanced detection of FLT3 D835/I836, JAK2 V617F and NPM1 mutations.	Pubmed	0.0005696	1	0.04706	0.5509	2	2	NPM1,JAK2
Pubmed	15582715	Proteinase-activated receptors (PARs)--the PAR3 Neo-N-terminal peptide TFRGAP interacts with PAR1.	Pubmed	0.0005696	1	0.04706	0.5509	2	2	F2R,F2RL2
Pubmed	20035055	Biglycan and fibromodulin have essential roles in regulating chondrogenesis and extracellular matrix turnover in temporomandibular joint osteoarthritis.	Pubmed	0.0005696	1	0.04706	0.5509	2	2	FMOD,BGN
Pubmed	8195005	Hb Kurdistan [alpha 47(CE5)Asp-->Tyr], a new alpha chain variant in combination with beta (0)-thalassemia.	Pubmed	0.0005696	1	0.04706	0.5509	2	2	HBA1,HBA2
Pubmed	20442298	Thrombin regulates the metastatic potential of human rhabdomyosarcoma cells: distinct role of PAR1 and PAR3 signaling.	Pubmed	0.0005696	1	0.04706	0.5509	2	2	F2R,F2RL2
Pubmed	18272374	Association study of the GAB2 gene with the risk of developing Alzheimer's disease.	Pubmed	0.0005696	1	0.04706	0.5509	2	2	APOE,GAB2
Pubmed	23616123	Methylation-mediated repression of GADD45A and GADD45G expression in gastric cardia adenocarcinoma.	Pubmed	0.0005696	1	0.04706	0.5509	2	2	GADD45G,GADD45A
Pubmed	24876927	Mitochondrial fusion protein MFN2 interacts with the mitostatin-related protein MNS1 required for mouse sperm flagellar structure and function.	Pubmed	0.0005696	1	0.04706	0.5509	2	2	MNS1,MFN2
Pubmed	15644315	B23 regulates GADD45a nuclear translocation and contributes to GADD45a-induced cell cycle G2-M arrest.	Pubmed	0.0005696	1	0.04706	0.5509	2	2	NPM1,GADD45A
Pubmed	7010180	Homology and concerted evolution at the alpha 1 and alpha 2 loci of human alpha-globin.	Pubmed	0.0005696	1	0.04706	0.5509	2	2	HBA1,HBA2
Pubmed	20924359	Ubiquitination and deubiquitination of NP protein regulates influenza A virus RNA replication.	Pubmed	0.0005696	1	0.04706	0.5509	2	2	USP11,UBB
Pubmed	20841355	Serine 59 phosphorylation of {alpha}B-crystallin down-regulates its anti-apoptotic function by binding and sequestering Bcl-2 in breast cancer cells.	Pubmed	0.0005696	1	0.04706	0.5509	2	2	BCL2,CRYAB
Pubmed	15277329	Inhibition of diet-induced atherosclerosis and endothelial dysfunction in apolipoprotein E/angiotensin II type 1A receptor double-knockout mice.	Pubmed	0.0005696	1	0.04706	0.5509	2	2	APOE,AGTRAP
Pubmed	21959923	Association of ARMS2/HTRA1 variants with polypoidal choroidal vasculopathy phenotype in a Korean population.	Pubmed	0.0005696	1	0.04706	0.5509	2	2	ARMS2,HTRA1
Pubmed	19933195	Analysis of six genetic risk factors highly associated with AMD in the region surrounding ARMS2 and HTRA1 on chromosome 10, region q26.	Pubmed	0.0005696	1	0.04706	0.5509	2	2	ARMS2,HTRA1
Pubmed	17931355	Expression of mutant ubiquitin (UBB+1) and p62 in myotilinopathies and desminopathies.	Pubmed	0.0005696	1	0.04706	0.5509	2	2	SQSTM1,UBB
Pubmed	9806903	Cloning of an intracellular protein that binds selectively to mitogenic acidic fibroblast growth factor.	Pubmed	0.0005696	1	0.04706	0.5509	2	2	FGF1,FIBP
Pubmed	24966230	Fibromodulin and Biglycan Modulate Periodontium through TGF?/BMP Signaling.	Pubmed	0.0005696	1	0.04706	0.5509	2	2	FMOD,BGN
Pubmed	11591706	Double prenylation by RabGGTase can proceed without dissociation of the mono-prenylated intermediate.	Pubmed	0.0005696	1	0.04706	0.5509	2	2	RAB7A,RABGGTB
Pubmed	23138098	Alpha thalassaemia and extended alpha globin genes in Sri Lanka.	Pubmed	0.0005696	1	0.04706	0.5509	2	2	HBA1,HBA2
Pubmed	10191089	Close physical linkage of human troponin genes: organization, sequence, and expression of the locus encoding cardiac troponin I and slow skeletal troponin T.	Pubmed	0.0005696	1	0.04706	0.5509	2	2	TNNI3,TNNT1
Pubmed	26343804	Apolipoprotein E and Clusterin can magnify effects of personality vulnerability on declarative memory performance in non-demented older adults.	Pubmed	0.0005696	1	0.04706	0.5509	2	2	APOE,CLU
Pubmed	17376866	Protease-activated receptor-3 (PAR3) regulates PAR1 signaling by receptor dimerization.	Pubmed	0.0005696	1	0.04706	0.5509	2	2	F2R,F2RL2
Pubmed	11984523	The role of transforming growth factor beta-2, beta-3 in mediating apoptosis in the murine intestinal mucosa.	Pubmed	0.0005696	1	0.04706	0.5509	2	2	TGFB2,TGFB3
Pubmed	22324317	A novel ?(0) -thalassemia deletion in a Greek patient with HbH disease and ?-thalassemia trait.	Pubmed	0.0005696	1	0.04706	0.5509	2	2	HBA1,HBB
Pubmed	26377141	Evaluation of Alpha-Thalassemia Mutations in Cases with Hypochromic Microcytic Anemia: The ?stanbul Perspective.	Pubmed	0.0005696	1	0.04706	0.5509	2	2	HBA1,HBA2
Pubmed	8506363	Positional specification of ventricular myosin light chain 2 expression in the primitive murine heart tube.	Pubmed	0.0005696	1	0.04706	0.5509	2	2	MYL2,NPPA
Pubmed	15557275	Endogenous protein kinase inhibitor gamma terminates immediate-early gene expression induced by cAMP-dependent protein kinase (PKA) signaling: termination depends on PKA inactivation rather than PKA export from the nucleus.	Pubmed	0.0005696	1	0.04706	0.5509	2	2	PKIG,PRKACA
Pubmed	22374170	Rapid identification of the copy number of ?-globin genes by capillary electrophoresis analysis.	Pubmed	0.0005696	1	0.04706	0.5509	2	2	HBA1,HBA2
Pubmed	12763067	Connective tissue growth factor: a novel marker of layer VII neurons in the rat cerebral cortex.	Pubmed	0.0005696	1	0.04706	0.5509	2	2	MAP2,CCN2
Pubmed	17715399	Association of nucleophosmin negatively regulates CXCR4-mediated G protein activation and chemotaxis.	Pubmed	0.0005696	1	0.04706	0.5509	2	2	NPM1,CXCR4
Pubmed	21085490	Protein kinase A binds and activates heat shock factor 1.	Pubmed	0.0005696	1	0.04706	0.5509	2	2	HSF1,PRKACA
Pubmed	22355774	Excess ?-synuclein worsens disease in mice lacking ubiquitin carboxy-terminal hydrolase L1.	Pubmed	0.0005696	1	0.04706	0.5509	2	2	SNCA,UCHL1
Pubmed	14649316	Hb Setif [alpha94(G1)Asp --> Tyr (alpha2)] detected in a Turkish family.	Pubmed	0.0005696	1	0.04706	0.5509	2	2	HBA1,HBA2
Pubmed	10950934	Chromosomal localization, gene structure, and expression pattern of DDAH1: comparison with DDAH2 and implications for evolutionary origins.	Pubmed	0.0005696	1	0.04706	0.5509	2	2	DDAH2,DDAH1
Pubmed	20010544	Circulating methylarginine levels and the decline in renal function in patients with chronic kidney disease are modulated by DDAH1 polymorphisms.	Pubmed	0.0005696	1	0.04706	0.5509	2	2	DDAH2,DDAH1
Pubmed	2606724	Hb Evans or alpha 262(E11)Val----Met beta 2; an unstable hemoglobin causing a mild hemolytic anemia.	Pubmed	0.0005696	1	0.04706	0.5509	2	2	HBA1,HBA2
Pubmed	14692700	Morphogenesis of Lewy bodies: dissimilar incorporation of alpha-synuclein, ubiquitin, and p62.	Pubmed	0.0005696	1	0.04706	0.5509	2	2	SNCA,SQSTM1
Pubmed	28683125	UCP-2 is involved in angiotensin-II-induced abdominal aortic aneurysm in apolipoprotein E-knockout mice.	Pubmed	0.0005696	1	0.04706	0.5509	2	2	APOE,UCP2
Pubmed	28583181	Bringing the age-related macular degeneration high-risk allele age-related maculopathy susceptibility 2 into focus with stem cell technology.	Pubmed	0.0005696	1	0.04706	0.5509	2	2	ARMS2,HTRA1
Pubmed	26020117	Identification of a distinct population of CD133(+)CXCR4(+) cancer stem cells in ovarian cancer.	Pubmed	0.0005696	1	0.04706	0.5509	2	2	PROM1,CXCR4
Pubmed	28108469	Blood RNA biomarkers in prodromal PARK4 and rapid eye movement sleep behavior disorder show role of complexin 1 loss for risk of Parkinson's disease.	Pubmed	0.0005696	1	0.04706	0.5509	2	2	SNCA,CPLX1
Pubmed	1657614	Effect of ubiquitin on platelet functions: possible identity with platelet activity suppressive lymphokine (PASL).	Pubmed	0.0005696	1	0.04706	0.5509	2	2	RPS27A,UBB
Pubmed	12163017	Expression and biological activity of Baculovirus generated wild-type human slow alpha tropomyosin and the Met9Arg mutant responsible for a dominant form of nemaline myopathy.	Pubmed	0.0005696	1	0.04706	0.5509	2	2	ACTA1,TPM3
Pubmed	17851741	IF(1) distribution in HepG2 cells in relation to ecto-F(0)F (1)ATPsynthase and calmodulin.	Pubmed	0.0005696	1	0.04706	0.5509	2	2	ATP5PO,ATP5IF1
Pubmed	18006821	Heat shock protein B8, a cyclin-dependent kinase-independent cyclin D1 target gene, contributes to its effects on radiation sensitivity.	Pubmed	0.0005696	1	0.04706	0.5509	2	2	CCND1,HSPB8
Pubmed	28735867	Cleavage of the Interleukin-11 receptor induces processing of its C-terminal fragments by the gamma-secretase and the proteasome.	Pubmed	0.0005696	1	0.04706	0.5509	2	2	PSENEN,IL11RA
Pubmed	21122828	ARMS2/HTRA1 locus can confer differential susceptibility to the advanced subtypes of age-related macular degeneration.	Pubmed	0.0005696	1	0.04706	0.5509	2	2	ARMS2,HTRA1
Pubmed	10604301	Mouse genetics: a tool to help unlock the mechanisms of glaucoma.	Pubmed	0.0005696	1	0.04706	0.5509	2	2	GPNMB,TYRP1
Pubmed	22096479	Multiple sites in ?B-crystallin modulate its interactions with desmin filaments assembled in vitro.	Pubmed	0.0005696	1	0.04706	0.5509	2	2	CRYAB,DES
Pubmed	17676633	Shb null allele is inherited with a transmission ratio distortion and causes reduced viability in utero.	Pubmed	0.0005696	1	0.04706	0.5509	2	2	SHB,TMEM163
Pubmed	17475909	The human Shwachman-Diamond syndrome protein, SBDS, associates with ribosomal RNA.	Pubmed	0.0005696	1	0.04706	0.5509	2	2	NPM1,SBDS
Pubmed	24662300	Association between polymorphisms in sclerostin, dickkopfs and secreted frizzled-related protein genes and bone mineral density in postmenopausal Korean women.	Pubmed	0.0005696	1	0.04706	0.5509	2	2	SFRP4,FRZB
Pubmed	23063459	Expression of heat shock transcription factor 1 and its downstream target protein T-cell death associated gene 51 in the spinal cord of a mouse model of amyotrophic lateral sclerosis.	Pubmed	0.0005696	1	0.04706	0.5509	2	2	PHLDA1,HSF1
Pubmed	12766039	Ocular and scleral alterations in gene-targeted lumican-fibromodulin double-null mice.	Pubmed	0.0005696	1	0.04706	0.5509	2	2	FMOD,LUM
Pubmed	19276544	Implication of GAB2 gene polymorphism in Italian patients with Alzheimer's disease.	Pubmed	0.0005696	1	0.04706	0.5509	2	2	APOE,GAB2
Pubmed	9084133	Distribution of nestin in the developing mouse limb bud in vivo and in micro-mass cultures of cells isolated from limb buds.	Pubmed	0.0005696	1	0.04706	0.5509	2	2	NES,DES
Pubmed	7881131	Temporally and spatially restricted expression of apolipoprotein J in the developing heart defines discrete stages of valve morphogenesis.	Pubmed	0.0005696	1	0.04706	0.5509	2	2	NPPA,CLU
Pubmed	19609719	Dominant-positive HSF1 decreases alpha-synuclein level and alpha-synuclein-induced toxicity.	Pubmed	0.0005696	1	0.04706	0.5509	2	2	SNCA,HSF1
Pubmed	8413665	The structure of crystalline profilin-beta-actin.	Pubmed	0.0005696	1	0.04706	0.5509	2	2	ACTA1,PFN1
Pubmed	23582991	Genetic influences on the outcome of anti-vascular endothelial growth factor treatment in neovascular age-related macular degeneration.	Pubmed	0.0005696	1	0.04706	0.5509	2	2	ARMS2,HTRA1
Pubmed	20196787	Dual action of apolipoprotein E-interacting HCCR-1 oncoprotein and its implication for breast cancer and obesity.	Pubmed	0.0005696	1	0.04706	0.5509	2	2	APOE,LETMD1
Pubmed	22528093	Search for amyloid-binding proteins by affinity chromatography.	Pubmed	0.0005696	1	0.04706	0.5509	2	2	APOE,CLU
Pubmed	22178090	The pathological characteristics of glioma stem cell niches.	Pubmed	0.0005696	1	0.04706	0.5509	2	2	NES,PROM1
Pubmed	29233684	mmu-miR-1963 negatively regulates the ameloblast differentiation of LS8 cell line by directly targeting Smoc2 3'UTR.	Pubmed	0.0005696	1	0.04706	0.5509	2	2	SMOC2,RUNX2
Pubmed	25205867	Overexpression of HtrA1 and exposure to mainstream cigarette smoke leads to choroidal neovascularization and subretinal deposits in aged mice.	Pubmed	0.0005696	1	0.04706	0.5509	2	2	ARMS2,HTRA1
Pubmed	24585742	Desensitization of myofilaments to Ca2+ as a therapeutic target for hypertrophic cardiomyopathy with mutations in thin filament proteins.	Pubmed	0.0005696	1	0.04706	0.5509	2	2	TNNI3,TPM1
Pubmed	23002235	Flow-sensitive K+-coupled ATP secretion modulates activity of the epithelial Na+ channel in the distal nephron.	Pubmed	0.0005696	1	0.04706	0.5509	2	2	KCNMB4,KCNMB1
Pubmed	20108350	Fibromodulin regulates collagen fibrillogenesis during peripheral corneal development.	Pubmed	0.0005696	1	0.04706	0.5509	2	2	FMOD,LUM
Pubmed	26786611	Association between variation in the genes DDAH1 and DDAH2 and hypertension among Uygur, Kazakh and Han ethnic groups in China.	Pubmed	0.0005696	1	0.04706	0.5509	2	2	DDAH2,DDAH1
Pubmed	16520895	Increasing ornithine decarboxylase activity is another way of prolactin preventing methotrexate-induced apoptosis: crosstalk between ODC and BCL-2.	Pubmed	0.0005696	1	0.04706	0.5509	2	2	BCL2,ODC1
Pubmed	18005258	Monitoring the prevention of amyloid fibril formation by alpha-crystallin. Temperature dependence and the nature of the aggregating species.	Pubmed	0.0005696	1	0.04706	0.5509	2	2	SNCA,CRYAB
Pubmed	24530230	MEAF6/PHF1 is a recurrent gene fusion in endometrial stromal sarcoma.	Pubmed	0.0005696	1	0.04706	0.5509	2	2	PHF1,MEAF6
Pubmed	1370760	Differential expression of translation-associated genes in benign and malignant human breast tumours.	Pubmed	0.0005696	1	0.04706	0.5509	2	2	RPS27A,UBB
Pubmed	15365991	Sequence variations of the alpha-globin genes: scanning of high CG content genes with DHPLC and DG-DGGE.	Pubmed	0.0005696	1	0.04706	0.5509	2	2	HBA1,HBA2
Pubmed	11788435	Dietary salt supplementation selectively downregulates NPR-C receptor expression in kidney independently of ANP.	Pubmed	0.0005696	1	0.04706	0.5509	2	2	NPPA,NPR3
Pubmed	1652217	Natriuretic peptides inhibit rat astroglial proliferation: mediation by C receptor.	Pubmed	0.0005696	1	0.04706	0.5509	2	2	NPPA,NPR3
Pubmed	21606958	The immunoglobulin heavy chain gene 3' enhancers induce Bcl2 deregulation and lymphomagenesis in murine B cells.	Pubmed	0.0005696	1	0.04706	0.5509	2	2	BCL2,TMEM163
Pubmed	12383268	The inhibitory region of troponin-I alters the ability of F-actin to interact with different segments of myosin.	Pubmed	0.0005696	1	0.04706	0.5509	2	2	ACTA1,TNNI3
Pubmed	22924376	Identification of ?-globin chain variants: a report from Iran.	Pubmed	0.0005696	1	0.04706	0.5509	2	2	HBA1,HBA2
Pubmed	23969301	A novel association of two non-synonymous polymorphisms in PER2 and PER3 genes with specific diurnal preference subscales.	Pubmed	0.0005696	1	0.04706	0.5509	2	2	PER3,PER2
Pubmed	29064674	Heterogeneity between Two ? Subunits of ?2?2 Human Hemoglobin and O2 Binding Properties: Raman, 1H Nuclear Magnetic Resonance, and Terahertz Spectra.	Pubmed	0.0005696	1	0.04706	0.5509	2	2	HBA2,HBB
Pubmed	26577677	Growth differentiation factor 8 suppresses cell proliferation by up-regulating CTGF expression in human granulosa cells.	Pubmed	0.0005696	1	0.04706	0.5509	2	2	MSTN,CCN2
Pubmed	3336363	Human hTM alpha gene: expression in muscle and nonmuscle tissue.	Pubmed	0.0005696	1	0.04706	0.5509	2	2	TPM1,TPM3
Pubmed	11833853	Variable severity of beta-thalassemia patients of eastern India: effect of alpha-thalassemia and xmnI polymorphism.	Pubmed	0.0005696	1	0.04706	0.5509	2	2	HBA1,HBB
Pubmed	30063927	Single Nucleotide Polymorphisms of HAAO and IRX6 Genes as Risk Factors for Hypospadias.	Pubmed	0.0005696	1	0.04706	0.5509	2	2	HAAO,IRX6
Pubmed	17608931	Absence of glaucoma in DBA/2J mice homozygous for wild-type versions of Gpnmb and Tyrp1.	Pubmed	0.0005696	1	0.04706	0.5509	2	2	GPNMB,TYRP1
Pubmed	31029938	ApoE and clusterin CSF levels influence associations between APOE genotype and changes in CSF tau, but not CSF A?42, levels in non-demented elderly.	Pubmed	0.0005696	1	0.04706	0.5509	2	2	APOE,CLU
Pubmed	20179953	Congenital myotonic dystrophy can show congenital fiber type disproportion pathology.	Pubmed	0.0005696	1	0.04706	0.5509	2	2	ACTA1,TPM3
Pubmed	19056852	The protective role of Per2 against carbon tetrachloride-induced hepatotoxicity.	Pubmed	0.0005696	1	0.04706	0.5509	2	2	PER2,UCP2
Pubmed	14704365	GRK6 deficiency is associated with enhanced CXCR4-mediated neutrophil chemotaxis in vitro and impaired responsiveness to G-CSF in vivo.	Pubmed	0.0005696	1	0.04706	0.5509	2	2	GRK6,CXCR4
Pubmed	28000861	CXCR4 is involved in CD133-induced EMT in non-small cell lung cancer.	Pubmed	0.0005696	1	0.04706	0.5509	2	2	PROM1,CXCR4
Pubmed	26172301	Multifaceted interactions and regulation between antizyme and its interacting proteins cyclin D1, ornithine decarboxylase and antizyme inhibitor.	Pubmed	0.0005696	1	0.04706	0.5509	2	2	CCND1,ODC1
Pubmed	15985430	Involvement of inflammation, degradation, and apoptosis in a mouse model of glaucoma.	Pubmed	0.0005696	1	0.04706	0.5509	2	2	GPNMB,TYRP1
Pubmed	20140183	Genetic and functional dissection of HTRA1 and LOC387715 in age-related macular degeneration.	Pubmed	0.0005696	1	0.04706	0.5509	2	2	ARMS2,HTRA1
Pubmed	1634363	A new alpha chain variant, Hb Hanamaki or alpha 2(139)(HC1)Lys----Glu beta 2, found in a Japanese family.	Pubmed	0.0005696	1	0.04706	0.5509	2	2	HBA1,HBA2
Pubmed	26082478	Inhibition of DDAH1, but not DDAH2, results in apoptosis of a human trophoblast cell line in response to TRAIL.	Pubmed	0.0005696	1	0.04706	0.5509	2	2	DDAH2,DDAH1
Pubmed	16814409	Reduction of invasion in human fibrosarcoma cells by ribosomal protein S3 in conjunction with Nm23-H1 and ERK.	Pubmed	0.0005696	1	0.04706	0.5509	2	2	RPS3,NME1
Pubmed	22491416	Differentiation of exudative age-related macular degeneration and polypoidal choroidal vasculopathy in the ARMS2/HTRA1 locus.	Pubmed	0.0005696	1	0.04706	0.5509	2	2	ARMS2,HTRA1
Pubmed	20067552	alphaB-crystallin is mutant B-RAF regulated and contributes to cyclin D1 turnover in melanocytic cells.	Pubmed	0.0005696	1	0.04706	0.5509	2	2	CCND1,CRYAB
Pubmed	24447998	Interclass small leucine-rich repeat proteoglycan interactions regulate collagen fibrillogenesis and corneal stromal assembly.	Pubmed	0.0005696	1	0.04706	0.5509	2	2	BGN,LUM
Pubmed	22740512	Functional structure of the promoter regions for the predominant low molecular weight isoforms of tropomyosin in human kidney cells.	Pubmed	0.0005696	1	0.04706	0.5509	2	2	TPM1,TPM3
Pubmed	21831961	PEA3 activates CXCR4 transcription in MDA-MB-231 and MCF7 breast cancer cells.	Pubmed	0.0005696	1	0.04706	0.5509	2	2	ETV4,CXCR4
Pubmed	16901895	TTLL7 is a mammalian beta-tubulin polyglutamylase required for growth of MAP2-positive neurites.	Pubmed	0.0005696	1	0.04706	0.5509	2	2	MAP2,TTLL7
Pubmed	27007162	Transcription factor RUNX2 up-regulates chemokine receptor CXCR4 to promote invasive and metastatic potentials of human gastric cancer.	Pubmed	0.0005696	1	0.04706	0.5509	2	2	RUNX2,CXCR4
Pubmed	20836851	Hemoglobin ? and ? are ubiquitous in the human lung, decline in idiopathic pulmonary fibrosis but not in COPD.	Pubmed	0.0005696	1	0.04706	0.5509	2	2	HBA1,HBB
Pubmed	23902341	Enhanced sensitivity of colon tumour cells to natural killer cell cytotoxicity after mild thermal stress is regulated through HSF1-mediated expression of MICA.	Pubmed	0.0005696	1	0.04706	0.5509	2	2	MICA,HSF1
Pubmed	25320307	Merkel cell polyomavirus small T antigen mediates microtubule destabilization to promote cell motility and migration.	Pubmed	0.0005696	1	0.04706	0.5509	2	2	PPP4C,STMN1
Pubmed	25120750	Clinical value of CD133 and nestin in patients with glioma: a population-based study.	Pubmed	0.0005696	1	0.04706	0.5509	2	2	NES,PROM1
Pubmed	18297066	A molecular pathway of neurodegeneration linking alpha-synuclein to ApoE and Abeta peptides.	Pubmed	0.0005696	1	0.04706	0.5509	2	2	APOE,SNCA
Pubmed	20157352	Genetic analysis of typical wet-type age-related macular degeneration and polypoidal choroidal vasculopathy in Japanese population.	Pubmed	0.0005696	1	0.04706	0.5509	2	2	ARMS2,HTRA1
Pubmed	8592474	Ubiquinol-cytochrome-c reductase from human and bovine mitochondria.	Pubmed	0.0005696	1	0.04706	0.5509	2	2	UQCRQ,UQCR10
Pubmed	15364413	Association study of three polymorphisms of kinesin light-chain 1 gene with Alzheimer's disease.	Pubmed	0.0005696	1	0.04706	0.5509	2	2	APOE,KLC1
Pubmed	20863990	Effect of human S100A13 gene silencing on FGF-1 transportation in human endothelial cells.	Pubmed	0.0005696	1	0.04706	0.5509	2	2	S100A13,FGF1
Pubmed	20854119	Spectrum of ?-globin gene mutations in the Kerman Province of Iran.	Pubmed	0.0005696	1	0.04706	0.5509	2	2	HBA1,HBA2
Pubmed	26092504	Clinical and biological significance of stem-like CD133(+)CXCR4(+) cells in esophageal squamous cell carcinoma.	Pubmed	0.0005696	1	0.04706	0.5509	2	2	PROM1,CXCR4
Pubmed	8232588	Bcl-2 associates with the ras-related protein R-ras p23.	Pubmed	0.0005696	1	0.04706	0.5509	2	2	RRAS,BCL2
Pubmed	28383049	Suppressor of Cytokine Signaling 2 Negatively Regulates NK Cell Differentiation by Inhibiting JAK2 Activity.	Pubmed	0.0005696	1	0.04706	0.5509	2	2	SOCS2,JAK2
Pubmed	25118265	Loss of outer retinal neurons and circuitry alterations in the DBA/2J mouse.	Pubmed	0.0005696	1	0.04706	0.5509	2	2	GPNMB,TYRP1
Pubmed	25139985	Experimental basis for a new allosteric model for multisubunit proteins.	Pubmed	0.0005696	1	0.04706	0.5509	2	2	HBA1,HBB
Pubmed	20456446	LOC387715/HTRA1 polymorphisms, smoking and combined effects on exudative age-related macular degeneration in a Korean population.	Pubmed	0.0005696	1	0.04706	0.5509	2	2	ARMS2,HTRA1
Pubmed	27566162	Desmin and ?B-crystallin interplay in the maintenance of mitochondrial homeostasis and cardiomyocyte survival.	Pubmed	0.0005696	1	0.04706	0.5509	2	2	CRYAB,DES
Pubmed	31304855	The Spectrum of ?-Thalassemia Mutations in the Lak Population of Iran.	Pubmed	0.0005696	1	0.04706	0.5509	2	2	HBA1,HBA2
Pubmed	23246698	Human PSENEN and U2AF1L4 genes are concertedly regulated by a genuine bidirectional promoter.	Pubmed	0.0005696	1	0.04706	0.5509	2	2	PSENEN,U2AF1L4
Pubmed	24140250	Activation of cyclic AMP/PKA pathway inhibits bladder cancer cell invasion by targeting MAP4-dependent microtubule dynamics.	Pubmed	0.0005696	1	0.04706	0.5509	2	2	MAP4,PRKACA
Pubmed	15236975	Interaction of the molecular chaperone alphaB-crystallin with alpha-synuclein: effects on amyloid fibril formation and chaperone activity.	Pubmed	0.0005696	1	0.04706	0.5509	2	2	SNCA,CRYAB
Pubmed	26356819	Stathmin 1 inhibition amplifies ruxolitinib-induced apoptosis in JAK2V617F cells.	Pubmed	0.0005696	1	0.04706	0.5509	2	2	JAK2,STMN1
Pubmed	7929424	Interleukin-3 and bryostatin-1 mediate hyperphosphorylation of BCL2 alpha in association with suppression of apoptosis.	Pubmed	0.0005696	1	0.04706	0.5509	2	2	BCL2,PRKACA
Pubmed	28470624	?B-crystallin is a sensor for assembly intermediates and for the subunit topology of desmin intermediate filaments.	Pubmed	0.0005696	1	0.04706	0.5509	2	2	CRYAB,DES
Pubmed	29930002	Diabetic Vascular Calcification Mediated by the Collagen Receptor Discoidin Domain Receptor 1 via the Phosphoinositide 3-Kinase/Akt/Runt-Related Transcription Factor 2 Signaling Axis.	Pubmed	0.0005696	1	0.04706	0.5509	2	2	DDR1,RUNX2
Pubmed	26466742	Expression of CXCR4 in cord blood-derived CD133+ cells treated with platelet micro-particles.	Pubmed	0.0005696	1	0.04706	0.5509	2	2	PROM1,CXCR4
Pubmed	24826793	Novel point mutation of the ?2-globin gene (HBA2) and a rare 2.4?kb deletion of the ?1-globin gene (HBA1), identified in two chinese patients with Hb H disease.	Pubmed	0.0005696	1	0.04706	0.5509	2	2	HBA1,HBA2
Pubmed	12673836	Effect of alpha-globin genotype on the pathophysiology of sickle cell disease.	Pubmed	0.0005696	1	0.04706	0.5509	2	2	HBA1,HBA2
Pubmed	1796905	The molecular basis for tropomyosin isoform diversity.	Pubmed	0.0005696	1	0.04706	0.5509	2	2	TPM1,TPM3
Pubmed	19321445	Functional interaction between Chfr and Kif22 controls genomic stability.	Pubmed	0.0005696	1	0.04706	0.5509	2	2	CHFR,KIF22
Pubmed	28205519	Mitochondrial ATP transporter depletion protects mice against liver steatosis and insulin resistance.	Pubmed	0.0005696	1	0.04706	0.5509	2	2	SLC25A5,UCP2
Pubmed	6547932	The characterization of hemoglobin Manitoba or alpha (2)102(G9)Ser----Arg beta 2 and hemoglobin Contaldo or alpha (2)103(G10)His----Arg beta 2 by high performance liquid chromatography.	Pubmed	0.0005696	1	0.04706	0.5509	2	2	HBA1,HBA2
Pubmed	7358733	Sites of nonenzymatic glycosylation of human hemoglobin A.	Pubmed	0.0005696	1	0.04706	0.5509	2	2	HBA1,HBB
Pubmed	22156015	CD133 expression and identification of CD133/nestin positive cells in rhabdomyosarcomas and rhabdomyosarcoma cell lines.	Pubmed	0.0005696	1	0.04706	0.5509	2	2	NES,PROM1
Pubmed	24806679	Combined effects of Alzheimer risk variants in the CLU and ApoE genes on ventricular expansion patterns in the elderly.	Pubmed	0.0005696	1	0.04706	0.5509	2	2	APOE,CLU
Pubmed	15888546	Specific features of neuronal size and shape are regulated by tropomyosin isoforms.	Pubmed	0.0005696	1	0.04706	0.5509	2	2	TPM1,TPM3
Pubmed	25858550	Latent transforming growth factor-? binding proteins (LTBP-1 and LTBP-2) and gingiva keratinization.	Pubmed	0.0005696	1	0.04706	0.5509	2	2	LTBP1,LTBP2
Pubmed	28843803	Downregulation of Apolipoprotein-E and Apolipoprotein-J in Moyamoya Disease-A Proteome Analysis of Cerebrospinal Fluid.	Pubmed	0.0005696	1	0.04706	0.5509	2	2	APOE,CLU
Pubmed	28931607	Direct observation of conformational population shifts in crystalline human hemoglobin.	Pubmed	0.0005696	1	0.04706	0.5509	2	2	HBA1,HBB
Pubmed	6822572	Effects of troponin-I plus-C on the binding of troponin-T and its fragments to alpha-tropomyosin. Ca2+ sensitivity and cooperativity.	Pubmed	0.0005696	1	0.04706	0.5509	2	2	TNNT1,TPM1
Pubmed	3165083	Genes on chromosomes 1 and 4 in the mouse are associated with repair of radiation-induced chromatin damage.	Pubmed	0.0005696	1	0.04706	0.5509	2	2	BCL2,NPPA
Pubmed	14649314	Three new hemoglobin variants with abnormal oxygen affinity: Hb Saratoga Springs [alpha40(C5)Lys --> Asn (alpha1)], Hb Santa Clara [beta97(FG4)His --> Asn], and Hb Sparta [beta103(G5)Phe --> Val].	Pubmed	0.0005696	1	0.04706	0.5509	2	2	HBA1,HBB
Pubmed	21127401	Differential role of CD133 and CXCR4 in renal cell carcinoma.	Pubmed	0.0005696	1	0.04706	0.5509	2	2	PROM1,CXCR4
Pubmed	11078829	UV-induced expression of GADD45 is mediated by an oxidant sensitive pathway in cultured human keratinocytes and in human skin in vivo.	Pubmed	0.0005696	1	0.04706	0.5509	2	2	GADD45B,GADD45G
Pubmed	17890443	Influence of ScaI and natriuretic peptide (NP) clearance receptor polymorphisms of the NP System on NP concentration in chronic heart failure.	Pubmed	0.0005696	1	0.04706	0.5509	2	2	NPPA,NPR3
Pubmed	19255159	Localization of age-related macular degeneration-associated ARMS2 in cytosol, not mitochondria.	Pubmed	0.0005696	1	0.04706	0.5509	2	2	ARMS2,HTRA1
Pubmed	8989522	Temporospatial expression of the small HSP/alpha B-crystallin in cardiac and skeletal muscle during mouse development.	Pubmed	0.0005696	1	0.04706	0.5509	2	2	CRYAB,DES
Pubmed	8206089	Transforming growth factor-beta 2 induces apoptosis of murine T cell clones without down-regulating bcl-2 mRNA expression.	Pubmed	0.0005696	1	0.04706	0.5509	2	2	BCL2,TGFB2
Pubmed	11487204	Decreased platelet glutamate uptake and genetic risk factors in patients with Parkinson's disease.	Pubmed	0.0005696	1	0.04706	0.5509	2	2	APOE,SNCA
Pubmed	11488419	Immunohistochemical localization of members of the transforming growth factor (TGF)-beta superfamily in normal human salivary glands and pleomorphic adenomas.	Pubmed	0.0005696	1	0.04706	0.5509	2	2	TGFB2,TGFB3
Pubmed	24292672	Nuclear loss of protein arginine N-methyltransferase 2 in breast carcinoma is associated with tumor grade and overexpression of cyclin D1 protein.	Pubmed	0.0005696	1	0.04706	0.5509	2	2	CCND1,PRMT2
Pubmed	19553474	{alpha}-synuclein and its A30P mutant affect actin cytoskeletal structure and dynamics.	Pubmed	0.0005696	1	0.04706	0.5509	2	2	ACTA1,SNCA
Pubmed	11173882	Genetic association between Alzheimer disease and the alpha-synuclein gene.	Pubmed	0.0005696	1	0.04706	0.5509	2	2	APOE,SNCA
Pubmed	19422643	Potential roles for the small leucine-rich proteoglycans biglycan and fibromodulin in ectopic ossification of tendon induced by exercise and in modulating rotarod performance.	Pubmed	0.0005696	1	0.04706	0.5509	2	2	FMOD,BGN
Pubmed	11024467	Crystal structure of S-glutathiolated carbonic anhydrase III.	Pubmed	0.0005696	1	0.04706	0.5509	2	2	GLRX,CA3
Pubmed	23777983	CD 133+ and CXCR4+ colon cancer cells as a marker for lymph node metastasis.	Pubmed	0.0005696	1	0.04706	0.5509	2	2	PROM1,CXCR4
Pubmed	16287712	Gadd45 beta and Gadd45 gamma are critical for regulating autoimmunity.	Pubmed	0.0005696	1	0.04706	0.5509	2	2	GADD45B,GADD45G
Pubmed	21191724	Haplotype analysis of the ARMS2/HTRA1 region in Japanese patients with typical neovascular age-related macular degeneration or polypoidal choroidal vasculopathy.	Pubmed	0.0005696	1	0.04706	0.5509	2	2	ARMS2,HTRA1
Pubmed	20668689	Dynamic subunit exchange and the regulation of microtubule assembly by the stress response protein human alphaB crystallin.	Pubmed	0.0005696	1	0.04706	0.5509	2	2	TUBA4A,CRYAB
Pubmed	17920577	alpha/beta-Globin mRNA ratio determination by multiplex quantitative real-time reverse transcription-polymerase chain reaction as an indicator of globin gene function.	Pubmed	0.0005696	1	0.04706	0.5509	2	2	HBA2,HBB
Pubmed	5639009	Hemoglobin-Bibba or alpha-2-136Pro-beta 2, an unstable alpha chain abnormal hemoglobin.	Pubmed	0.0005696	1	0.04706	0.5509	2	2	HBA1,HBA2
Pubmed	11357958	Parkinson's disease is not associated with the combined alpha-synuclein/apolipoprotein E susceptibility genotype.	Pubmed	0.0005696	1	0.04706	0.5509	2	2	APOE,SNCA
Pubmed	22291026	On potential interactions between non-selective cation channel TRPM4 and sulfonylurea receptor SUR1.	Pubmed	0.0005696	1	0.04706	0.5509	2	2	ABCC8,TRPM4
Pubmed	22272352	RhoE is regulated by cyclic AMP and promotes fusion of human BeWo choriocarcinoma cells.	Pubmed	0.0005696	1	0.04706	0.5509	2	2	RND3,PRKACA
Pubmed	21693148	Parkinson's disease-associated mutations in ?-synuclein and UCH-L1 inhibit the unconventional secretion of UCH-L1.	Pubmed	0.0005696	1	0.04706	0.5509	2	2	SNCA,UCHL1
Pubmed	25629269	Prolactin increases expression of cytoskeletal proteins in SK-N-SH cells.	Pubmed	0.0005696	1	0.04706	0.5509	2	2	MAP2,NES
Pubmed	24578002	In-depth comparative characterization of hemoglobin glycation in normal and diabetic bloods by LC-MSMS.	Pubmed	0.0005696	1	0.04706	0.5509	2	2	HBA1,HBB
Pubmed	23936461	Regulation of A1 by OX40 contributes to CD8(+) T cell survival and anti-tumor activity.	Pubmed	0.0005696	1	0.04706	0.5509	2	2	BCL2,TNFRSF4
Pubmed	15781238	Loss of lysophospholipase 3 increases atherosclerosis in apolipoprotein E-deficient mice.	Pubmed	0.0005696	1	0.04706	0.5509	2	2	APOE,PLA2G15
Pubmed	22815750	Hemoglobin interactions with ?B crystallin: a direct test of sensitivity to protein instability.	Pubmed	0.0005696	1	0.04706	0.5509	2	2	HBA1,CRYAB
Pubmed	21821913	IgE stimulates human and mouse arterial cell apoptosis and cytokine expression and promotes atherogenesis in Apoe-/- mice.	Pubmed	0.0005696	1	0.04706	0.5509	2	2	FCER1A,APOE
Pubmed	27429853	Independent validation of a mathematical genomic model for survival of glioma patients.	Pubmed	0.0005696	1	0.04706	0.5509	2	2	FAM120AOS,PCDH15
Pubmed	10644725	Molecular cloning and characterization of Amida, a novel protein which interacts with a neuron-specific immediate early gene product arc, contains novel nuclear localization signals, and causes cell death in cultured cells.	Pubmed	0.0005696	1	0.04706	0.5509	2	2	NOL3,TFPT
Pubmed	3611073	The effects of troponin T fragments T1 and T2 on the binding of nonpolymerizable tropomyosin to F-actin in the presence and absence of troponin I and troponin C.	Pubmed	0.0005696	1	0.04706	0.5509	2	2	TNNT1,TPM1
Pubmed	25355627	Heat-induced expression of the immediate-early gene IER5 and its involvement in the proliferation of heat-shocked cells.	Pubmed	0.0005696	1	0.04706	0.5509	2	2	IER5,HSF1
Pubmed	15882059	A biophysical investigation of recombinant hemoglobins with aromatic B10 mutations in the distal heme pockets.	Pubmed	0.0005696	1	0.04706	0.5509	2	2	HBA1,HBB
Pubmed	24388797	A combined effect of two Alzheimer's risk genes on medial temporal activity during executive attention in young adults.	Pubmed	0.0005696	1	0.04706	0.5509	2	2	APOE,CLU
Pubmed	19924507	GAB2 is not associated with late-onset Alzheimer's disease in Chinese Han.	Pubmed	0.0005696	1	0.04706	0.5509	2	2	APOE,GAB2
Pubmed	24312338	RhoE promotes metastasis in gastric cancer through a mechanism dependent on enhanced expression of CXCR4.	Pubmed	0.0005696	1	0.04706	0.5509	2	2	RND3,CXCR4
Pubmed	12210873	ACT and UCH-L1 polymorphisms in Parkinson's disease and age of onset.	Pubmed	0.0005696	1	0.04706	0.5509	2	2	ACTA1,UCHL1
Pubmed	19700767	The tyrosine sulfate-rich domains of the LRR proteins fibromodulin and osteoadherin bind motifs of basic clusters in a variety of heparin-binding proteins, including bioactive factors.	Pubmed	0.0005696	1	0.04706	0.5509	2	2	FMOD,OMD
Pubmed	2101836	Hb Davenport or alpha 2(78)(EF7)Asn----His beta 2.	Pubmed	0.0005696	1	0.04706	0.5509	2	2	HBA1,HBA2
Pubmed	20523125	Autophagy in desmin-related cardiomyopathy: thoughts at the halfway point.	Pubmed	0.0005696	1	0.04706	0.5509	2	2	BCL2,CRYAB
Pubmed	27086042	Comparative proteomic analysis of CD34(+) cells in bone marrow between severe aplastic anemia and normal control.	Pubmed	0.0005696	1	0.04706	0.5509	2	2	DAD1,ATP5IF1
Pubmed	9473354	Tropomyosin in preimplantation mouse development: identification, expression, and organization during cell division and polarization.	Pubmed	0.0005696	1	0.04706	0.5509	2	2	TPM1,TPM3
Pubmed	12853116	Profiling gene transcription reveals a deficiency of mitochondrial oxidative phosphorylation in Trypanosoma cruzi-infected murine hearts: implications in chagasic myocarditis development.	Pubmed	0.0005696	1	0.04706	0.5509	2	2	COX7A1,COX7A2
Pubmed	8294199	Hb Melusine [alpha 114(GH2)Pro-->Ser]: a new neutral hemoglobin variant.	Pubmed	0.0005696	1	0.04706	0.5509	2	2	HBA1,HBA2
Pubmed	20403400	Upregulation of ANP and NPR-C mRNA in the kidney and heart of eNOS knockout mice.	Pubmed	0.0005696	1	0.04706	0.5509	2	2	NPPA,NPR3
Pubmed	26876430	The ATPase Inhibitory Factor 1 (IF1): A master regulator of energy metabolism and of cell survival.	Pubmed	0.0005696	1	0.04706	0.5509	2	2	ATP5PO,ATP5IF1
Pubmed	22871210	CD133(+)CXCR4(+) colon cancer cells exhibit metastatic potential and predict poor prognosis of patients.	Pubmed	0.0005696	1	0.04706	0.5509	2	2	PROM1,CXCR4
Pubmed	21908515	Genome-wide association study identifies breast cancer risk variant at 10q21.2: results from the Asia Breast Cancer Consortium.	Pubmed	0.0005696	1	0.04706	0.5509	2	2	ZNF365,LINC-PINT
Pubmed	17280645	Genetic association between polymorphisms of Pen2 gene and late onset Alzheimer's disease in the North Chinese population.	Pubmed	0.0005696	1	0.04706	0.5509	2	2	APOE,PSENEN
Pubmed	29632069	Extracellular ?-synuclein drives sphingosine 1-phosphate receptor subtype 1 out of lipid rafts, leading to impaired inhibitory G-protein signaling.	Pubmed	0.0005696	1	0.04706	0.5509	2	2	SNCA,S1PR1
Pubmed	10593883	MEKK3 directly regulates MEK5 activity as part of the big mitogen-activated protein kinase 1 (BMK1) signaling pathway.	Pubmed	0.0005696	1	0.04706	0.5509	2	2	MAP3K3,MAP2K5
Pubmed	17389375	Exercise reverses preamyloid oligomer and prolongs survival in alphaB-crystallin-based desmin-related cardiomyopathy.	Pubmed	0.0005696	1	0.04706	0.5509	2	2	CRYAB,DES
Pubmed	18757940	Inducing segmental aneuploid mosaicism in the mouse through targeted asymmetric sister chromatid event of recombination.	Pubmed	0.0005696	1	0.04706	0.5509	2	2	PRMT2,CSTB
Pubmed	28300150	S-nitrosylation of UCHL1 induces its structural instability and promotes ?-synuclein aggregation.	Pubmed	0.0005696	1	0.04706	0.5509	2	2	SNCA,UCHL1
Pubmed	20598923	Alpha-thalassemia is associated with a decreased occurrence and a delayed age-at-onset of albuminuria in sickle cell anemia patients.	Pubmed	0.0005696	1	0.04706	0.5509	2	2	HBA1,HBB
Pubmed	23134962	[Association between polymorphisms of Pen2 gene and late onset Alzheimer's disease].	Pubmed	0.0005696	1	0.04706	0.5509	2	2	APOE,PSENEN
Pubmed	19648472	Altered asymmetric dimethyl arginine metabolism in allergically inflamed mouse lungs.	Pubmed	0.0005696	1	0.04706	0.5509	2	2	DDAH2,PRMT2
Pubmed	25520874	A mathematical model for short-term vs. long-term survival in patients with glioma.	Pubmed	0.0005696	1	0.04706	0.5509	2	2	FAM120AOS,PCDH15
Pubmed	24081251	Clinical presentation and molecular identification of four uncommon alpha globin variants in Thailand. Initiation codon mutation of ?2-globin Gene (HBA2:c.1delA), donor splice site mutation of ?1-globin gene (IVSI-1, HBA1:c.95 + 1G>A), hemoglobin Queens Park/Chao Pra Ya (HBA1:c.98T>A) and hemoglobin Westmead (HBA2:c.369C>G).	Pubmed	0.0005696	1	0.04706	0.5509	2	2	HBA1,HBA2
Pubmed	21797699	The carrier frequency of ?-globin gene triplication in an Iranian population with normal or borderline hematological parameters.	Pubmed	0.0005696	1	0.04706	0.5509	2	2	HBA1,HBA2
Pubmed	21031019	LOC387715/HTRA1 gene polymorphisms and susceptibility to age-related macular degeneration: A HuGE review and meta-analysis.	Pubmed	0.0005696	1	0.04706	0.5509	2	2	ARMS2,HTRA1
Pubmed	12054662	Esterification of the propionate groups promotes alpha/beta hemoglobin chain homogeneity of CN-hemin binding.	Pubmed	0.0005696	1	0.04706	0.5509	2	2	HBA1,HBB
Pubmed	22345443	Live-cell imaging reveals multiple interactions between Epstein-Barr virus nuclear antigen 1 and cellular chromatin during interphase and mitosis.	Pubmed	0.0005696	1	0.04706	0.5509	2	2	EBNA1BP2,HMGB2
Pubmed	27143425	Risk-reducing Apolipoprotein E and Clusterin genotypes protect against the consequences of poor vascular health on executive function performance and change in nondemented older adults.	Pubmed	0.0005696	1	0.04706	0.5509	2	2	APOE,CLU
Pubmed	28974563	Fibromodulin and regulation of the intricate balance between myoblast differentiation to myocytes or adipocyte-like cells.	Pubmed	0.0005696	1	0.04706	0.5509	2	2	FMOD,CLU
Pubmed	29117940	ETV4 Facilitates Cell-Cycle Progression in Pancreatic Cells through Transcriptional Regulation of Cyclin D1.	Pubmed	0.0005696	1	0.04706	0.5509	2	2	ETV4,CCND1
Pubmed	17611642	Kinesin gene variability may affect tau phosphorylation in early Alzheimer's disease.	Pubmed	0.0005696	1	0.04706	0.5509	2	2	APOE,KLC1
Pubmed	19646995	Crystal structures of alpha-crystallin domain dimers of alphaB-crystallin and Hsp20.	Pubmed	0.0005696	1	0.04706	0.5509	2	2	CRYAB,HSPB6
Pubmed	29760184	Structural and Functional Rescue of Chronic Metabolically Stressed Optic Nerves through Respiration.	Pubmed	0.0005696	1	0.04706	0.5509	2	2	GPNMB,TYRP1
Pubmed	16901907	Neuroglycan C is a novel midkine receptor involved in process elongation of oligodendroglial precursor-like cells.	Pubmed	0.0005696	1	0.04706	0.5509	2	2	MDK,CSPG5
Pubmed	28400538	The transcription factor MAFK induces EMT and malignant progression of triple-negative breast cancer cells through its target GPNMB.	Pubmed	0.0005696	1	0.04706	0.5509	2	2	GPNMB,MAFK
Pubmed	19233122	Protein folding does not prevent the nonclassical export of FGF1 and S100A13.	Pubmed	0.0005696	1	0.04706	0.5509	2	2	S100A13,FGF1
Pubmed	25770145	Increased atherosclerosis in P2Y13/apolipoprotein E double-knockout mice: contribution of P2Y13 to reverse cholesterol transport.	Pubmed	0.0005696	1	0.04706	0.5509	2	2	APOE,P2RY13
Pubmed	21438011	Expression of the voltage- and Ca2+-dependent BK potassium channel subunits BK?1 and BK?4 in rodent astrocytes.	Pubmed	0.0005696	1	0.04706	0.5509	2	2	KCNMB4,KCNMB1
Pubmed	8744932	Cloning of cDNA with possible transcription factor activity at the G1-S phase transition in human fibroblast cell lines.	Pubmed	0.0005696	1	0.04706	0.5509	2	2	PFDN1,PFDN4
Pubmed	21162300	[Effects of hsf1 genotype on the constitutive expression of alphaB-crystallin in mice myocardium].	Pubmed	0.0005696	1	0.04706	0.5509	2	2	HSF1,CRYAB
Pubmed	17189204	A central thermogenic-like mechanism in feeding regulation: an interplay between arcuate nucleus T3 and UCP2.	Pubmed	0.0005696	1	0.04706	0.5509	2	2	UCP2,DIO2
Pubmed	1511986	Two new human hemoglobin variants caused by unusual mutational events: Hb Zaïre contains a five residue repetition within the alpha-chain and Hb Duino has two residues substituted in the beta-chain.	Pubmed	0.0005696	1	0.04706	0.5509	2	2	HBA1,HBB
Pubmed	18633189	Arterial stiffness, physical activity, and atrial natriuretic Peptide gene polymorphism in older subjects.	Pubmed	0.0005696	1	0.04706	0.5509	2	2	NPPA,NPR3
Pubmed	20682466	A new alpha(0)-thalassemia deletion found in a Dutch family (--(AW)).	Pubmed	0.0005696	1	0.04706	0.5509	2	2	HBA1,HBA2
Pubmed	15063763	LEPREL1, a novel ER and Golgi resident member of the Leprecan family.	Pubmed	0.0005696	1	0.04706	0.5509	2	2	P3H3,P3H2
Pubmed	17347481	Retrospective analysis of coagulation factor II receptor (F2R) sequence variation and coronary heart disease in hypertensive patients.	Pubmed	0.0005696	1	0.04706	0.5509	2	2	F2R,F2RL2
Pubmed	17192487	Transforming growth factor-beta2 and connective tissue growth factor in proliferative vitreoretinal diseases: possible involvement of hyalocytes and therapeutic potential of Rho kinase inhibitor.	Pubmed	0.0005696	1	0.04706	0.5509	2	2	TGFB2,CCN2
Pubmed	20348244	Dimethylarginine dimethylaminohydrolase overexpression ameliorates atherosclerosis in apolipoprotein E-deficient mice by lowering asymmetric dimethylarginine.	Pubmed	0.0005696	1	0.04706	0.5509	2	2	APOE,DDAH1
Pubmed	13872627	[The structure of normal adult human hemoglobins].	Pubmed	0.0005696	1	0.04706	0.5509	2	2	HBA1,HBB
Pubmed	16898315	Screening of concurrent alpha-thalassaemia 1 in beta-thalassaemia carriers.	Pubmed	0.0005696	1	0.04706	0.5509	2	2	HBA1,HBB
Pubmed	19797054	Deletion of a genomic segment containing the cardiac troponin I gene knocks down expression of the slow troponin T gene and impairs fatigue tolerance of diaphragm muscle.	Pubmed	0.0005696	1	0.04706	0.5509	2	2	TNNI3,TNNT1
Pubmed	17192461	Involvement of apolipoprotein E in excess fat accumulation and insulin resistance.	Pubmed	0.0005696	1	0.04706	0.5509	2	2	APOE,ASIP
Pubmed	7518430	Functional alterations in adult and fetal hemoglobin Sassari Asp-alpha 126(H9)-->His. The role of alpha 1 alpha 2 contact.	Pubmed	0.0005696	1	0.04706	0.5509	2	2	HBA1,HBA2
Pubmed	7373648	The structure of human carbonmonoxy haemoglobin at 2.7 A resolution.	Pubmed	0.0005696	1	0.04706	0.5509	2	2	HBA1,HBB
Pubmed	18505929	Growth factor regulation of estrogen receptor coregulator PELP1 functions via Protein Kinase A pathway.	Pubmed	0.0005696	1	0.04706	0.5509	2	2	PELP1,PRKACA
Pubmed	27879347	Recombinant Haplotypes Narrow the ARMS2/HTRA1 Association Signal for Age-Related Macular Degeneration.	Pubmed	0.0005696	1	0.04706	0.5509	2	2	ARMS2,HTRA1
Pubmed	10773677	Assignment of human GADD45G to chromosome 9q22.1-->q22.3 by radiation hybrid mapping.	Pubmed	0.0005696	1	0.04706	0.5509	2	2	GADD45B,GADD45G
Pubmed	17885813	Cell cycle related modulations in Runx2 protein levels are independent of lymphocyte enhancer-binding factor 1 (Lef1) in proliferating osteoblasts.	Pubmed	0.0005696	1	0.04706	0.5509	2	2	RUNX2,LEF1
Pubmed	20209122	Sequence variation in DDAH1 and DDAH2 genes is strongly and additively associated with serum ADMA concentrations in individuals with type 2 diabetes.	Pubmed	0.0005696	1	0.04706	0.5509	2	2	DDAH2,DDAH1
Pubmed	16537651	The small GTPase R-Ras regulates organization of actin and drives membrane protrusions through the activity of PLCepsilon.	Pubmed	0.0005696	1	0.04706	0.5509	2	2	RRAS,PLCE1
Pubmed	11165015	Arrested testis development in the cpk mouse may be the result of abnormal steroid metabolism.	Pubmed	0.0005696	1	0.04706	0.5509	2	2	CYS1,HSD17B8
Pubmed	19008226	Homologous sequence in lumican and fibromodulin leucine-rich repeat 5-7 competes for collagen binding.	Pubmed	0.0005696	1	0.04706	0.5509	2	2	FMOD,LUM
Pubmed	21325169	JAK2 rearrangements, including the novel SEC31A-JAK2 fusion, are recurrent in classical Hodgkin lymphoma.	Pubmed	0.0005696	1	0.04706	0.5509	2	2	SEC31A,JAK2
Pubmed	23402770	Novel mutations responsible for ?-thalassemia in Iranian families.	Pubmed	0.0005696	1	0.04706	0.5509	2	2	HBA1,HBA2
Pubmed	12890753	Interphase and monoastral-mitotic phenotypes of overexpressed MAP4 are modulated by free tubulin concentrations.	Pubmed	0.0005696	1	0.04706	0.5509	2	2	MAP2,MAP4
Pubmed	11675392	Phosphoisoprenoids modulate association of Rab geranylgeranyltransferase with REP-1.	Pubmed	0.0005696	1	0.04706	0.5509	2	2	RAB7A,RABGGTB
Pubmed	28347241	Nestin and cluster of differentiation 146 expression in breast cancer: Predicting early recurrence by targeting metastasis?	Pubmed	0.0005696	1	0.04706	0.5509	2	2	MCAM,NES
Pubmed	6469697	Hb J Oxford [alpha 15 (A13) Gly----Asp] in Japan.	Pubmed	0.0005696	1	0.04706	0.5509	2	2	HBA1,HBA2
Pubmed	19047559	Is olfactory impairment in Parkinson disease related to phenotypic or genotypic characteristics?	Pubmed	0.0005696	1	0.04706	0.5509	2	2	APOE,SNCA
Pubmed	23987636	The independent, unfavorable prognostic factors endothelin A receptor and chemokine receptor 4 have a close relationship in promoting the motility of nasopharyngeal carcinoma cells via the activation of AKT and MAPK pathways.	Pubmed	0.0005696	1	0.04706	0.5509	2	2	CXCR4,EDNRA
Pubmed	15626732	Endothelial barrier protection by activated protein C through PAR1-dependent sphingosine 1-phosphate receptor-1 crossactivation.	Pubmed	0.0005696	1	0.04706	0.5509	2	2	F2R,S1PR1
Pubmed	24265311	Dephosphorylation of barrier-to-autointegration factor by protein phosphatase 4 and its role in cell mitosis.	Pubmed	0.0005696	1	0.04706	0.5509	2	2	BANF1,PPP4C
Pubmed	29858490	MicroRNA-365 Inhibits Cell Growth and Promotes Apoptosis in Melanoma by Targeting BCL2 and Cyclin D1 (CCND1).	Pubmed	0.0005696	1	0.04706	0.5509	2	2	CCND1,BCL2
Pubmed	23322566	Morphology of astrocytes in a glaucomatous optic nerve.	Pubmed	0.0005696	1	0.04706	0.5509	2	2	GPNMB,TYRP1
Pubmed	16006154	Accelerated osteoarthritis in the temporomandibular joint of biglycan/fibromodulin double-deficient mice.	Pubmed	0.0005696	1	0.04706	0.5509	2	2	FMOD,BGN
Pubmed	4212045	Haemoglobin inkster (alpha2 85aspartic acid leads to valine beta2) coexisting with beta-thalassaemia in a Caucasian family.	Pubmed	0.0005696	1	0.04706	0.5509	2	2	HBA1,HBA2
Pubmed	16505033	Quantitative correlation of optic nerve pathology with ocular pressure and corneal thickness in the DBA/2 mouse model of glaucoma.	Pubmed	0.0005696	1	0.04706	0.5509	2	2	GPNMB,TYRP1
Pubmed	30462859	Interaction between interferon regulatory factor 6 and glycine receptor beta shows a protective effect on developing nonsyndromic cleft lip with or without cleft palate in the Han Chinese population.	Pubmed	0.0005696	1	0.04706	0.5509	2	2	GLRB,IRF6
Pubmed	24446231	Apolipoproteins E and J interfere with amyloid-beta uptake by primary human astrocytes and microglia in vitro.	Pubmed	0.0005696	1	0.04706	0.5509	2	2	APOE,CLU
Pubmed	20072700	Distinct functions of Period2 and Period3 in the mouse circadian system revealed by in vitro analysis.	Pubmed	0.0005696	1	0.04706	0.5509	2	2	PER3,PER2
Pubmed	2159627	Murine polyubiquitin mRNA sequence.	Pubmed	0.0005696	1	0.04706	0.5509	2	2	RPS27A,UBB
Pubmed	21047530	The telomeric part of the human chromosome 21 from Cstb to Prmt2 is not necessary for the locomotor and short-term memory deficits observed in the Tc1 mouse model of Down syndrome.	Pubmed	0.0005696	1	0.04706	0.5509	2	2	PRMT2,CSTB
Pubmed	17828274	Identification of tendon stem/progenitor cells and the role of the extracellular matrix in their niche.	Pubmed	0.0005696	1	0.04706	0.5509	2	2	FMOD,BGN
Pubmed	24035716	CXC chemokine receptor 4 expression, CXC chemokine receptor 4 activation, and wild-type nucleophosmin are independently associated with unfavorable prognosis in patients with acute myeloid leukemia.	Pubmed	0.0005696	1	0.04706	0.5509	2	2	NPM1,CXCR4
Pubmed	21949785	IgE recognition patterns of profilin, PR-10, and tropomyosin panallergens tested in 3,113 allergic patients by allergen microarray-based technology.	Pubmed	0.0005696	1	0.04706	0.5509	2	2	TPM1,PFN1
Pubmed	23568006	Enhanced chemosensitivity by simultaneously inhibiting cell cycle progression and promoting apoptosis of drug-resistant osteosarcoma MG63/DXR cells by targeting Cyclin D1 and Bcl-2.	Pubmed	0.0005696	1	0.04706	0.5509	2	2	CCND1,BCL2
Pubmed	15861393	Serine protease HtrA1 is developmentally regulated in trophoblast and uterine decidual cells during placental formation in the mouse.	Pubmed	0.0005696	1	0.04706	0.5509	2	2	HTRA1,DES
Pubmed	11485313	Transcriptional activity of the promoter region of rat frizzled-related protein gene.	Pubmed	0.0005696	1	0.04706	0.5509	2	2	SFRP4,FRZB
Pubmed	19479992	Neurons express hemoglobin alpha- and beta-chains in rat and human brains.	Pubmed	0.0005696	1	0.04706	0.5509	2	2	HBA2,HBB
Pubmed	11499613	Characterization of glycated hemoglobin in diabetic patients: usefulness of electrospray mass spectrometry in monitoring the extent and distribution of glycation.	Pubmed	0.0005696	1	0.04706	0.5509	2	2	HBA1,HBB
Pubmed	478977	Hemoglobin Suan-Dok (alpha 2 109 (G16) Leu replaced by Arg beta 2): an unstable variant associated with alpha-thalassemia.	Pubmed	0.0005696	1	0.04706	0.5509	2	2	HBA1,HBA2
Pubmed	20671240	Genetic Ace2 deficiency accentuates vascular inflammation and atherosclerosis in the ApoE knockout mouse.	Pubmed	0.0005696	1	0.04706	0.5509	2	2	APOE,ACE2
Pubmed	27983983	Clusterin in the protein corona plays a key role in the stealth effect of nanoparticles against phagocytes.	Pubmed	0.0005696	1	0.04706	0.5509	2	2	CLU,ACE2
Pubmed	22773442	Smooth muscle cell-specific runx2 deficiency inhibits vascular calcification.	Pubmed	0.0005696	1	0.04706	0.5509	2	2	APOE,RUNX2
Pubmed	9645951	Distinct subcellular localization of calcium binding S100 proteins in human smooth muscle cells and their relocation in response to rises in intracellular calcium.	Pubmed	0.0005696	1	0.04706	0.5509	2	2	ACTA1,S100A1
Pubmed	19215610	Hypocholesterolemia in adult patients with thalassemia: a link with the severity of genotype in thalassemia intermedia patients.	Pubmed	0.0005696	1	0.04706	0.5509	2	2	HBA1,HBB
Pubmed	18511946	Age-related macular degeneration is associated with an unstable ARMS2 (LOC387715) mRNA.	Pubmed	0.0005696	1	0.04706	0.5509	2	2	ARMS2,HTRA1
Pubmed	10569723	Two new alpha chain variants: Hb Boghé [alpha58(E7)His-->Gln, alpha2], a variant on the distal histidine, and Hb CHarolles [alpha103(G10)His-Tyr, alpha1].	Pubmed	0.0005696	1	0.04706	0.5509	2	2	HBA1,HBA2
Pubmed	17018883	Metallothioneins 1 and 2 attenuate peroxynitrite-induced oxidative stress in Parkinson disease.	Pubmed	0.0005696	1	0.04706	0.5509	2	2	MT2A,SNCA
Pubmed	27379525	HtrA1 Proteolysis of ApoE In Vitro Is Allele Selective.	Pubmed	0.0005696	1	0.04706	0.5509	2	2	APOE,HTRA1
Pubmed	17951248	Divergent regulation of the sarcomere and the cytoskeleton.	Pubmed	0.0005696	1	0.04706	0.5509	2	2	TPM1,TPM3
Pubmed	11447312	Ubiquitin-binding protein p62 is present in neuronal and glial inclusions in human tauopathies and synucleinopathies.	Pubmed	0.0005696	1	0.04706	0.5509	2	2	SNCA,SQSTM1
Pubmed	23228662	Tudor domains of the PRC2 components PHF1 and PHF19 selectively bind to histone H3K36me3.	Pubmed	0.0005696	1	0.04706	0.5509	2	2	PHF1,PHF19
Pubmed	20739468	Microarray analysis of iris gene expression in mice with mutations influencing pigmentation.	Pubmed	0.0005696	1	0.04706	0.5509	2	2	GPNMB,TYRP1
Pubmed	11939522	Hb Ube-2 in a Taiwanese subject: an A-->G substitution at codon 68 of the alpha2-globin gene.	Pubmed	0.0005696	1	0.04706	0.5509	2	2	HBA1,HBA2
Pubmed	22049084	High temperature requirement factor A1 (HTRA1) gene regulates angiogenesis through transforming growth factor-? family member growth differentiation factor 6.	Pubmed	0.0005696	1	0.04706	0.5509	2	2	GDF6,HTRA1
Pubmed	22496451	Genetic screening for regulators of Prz1, a transcriptional factor acting downstream of calcineurin in fission yeast.	Pubmed	0.0005696	1	0.04706	0.5509	2	2	MBP,PRKACA
Pubmed	30032071	Polymorphisms in the DAD1 and OXA1L genes are associated with asthma and atopy in a South American population.	Pubmed	0.0005696	1	0.04706	0.5509	2	2	OXA1L,DAD1
Pubmed	29206857	Z-disc protein CHAPb induces cardiomyopathy and contractile dysfunction in the postnatal heart.	Pubmed	0.0005696	1	0.04706	0.5509	2	2	SYNPO2L,ACTN2
Pubmed	2550906	Sequence of a cDNA specifying subunit VIIa of human cytochrome c oxidase.	Pubmed	0.0005696	1	0.04706	0.5509	2	2	COX7A1,COX7A2
Pubmed	17692272	LOC387715/HTRA1 variants in polypoidal choroidal vasculopathy and age-related macular degeneration in a Japanese population.	Pubmed	0.0005696	1	0.04706	0.5509	2	2	ARMS2,HTRA1
Pubmed	11178107	Genetic modification of glaucoma associated phenotypes between AKXD-28/Ty and DBA/2J mice.	Pubmed	0.0005696	1	0.04706	0.5509	2	2	GPNMB,TYRP1
Pubmed	30309760	Borderline hemoglobin A	Pubmed	0.0005696	1	0.04706	0.5509	2	2	HBA2,HBB
Pubmed	21041550	The identification of a novel locus for mandibular prognathism in the Han Chinese population.	Pubmed	0.0005696	1	0.04706	0.5509	2	2	TGFB3,LTBP2
Pubmed	11283605	Phosphorylation of Snapin by PKA modulates its interaction with the SNARE complex.	Pubmed	0.0005696	1	0.04706	0.5509	2	2	SNAPIN,PRKACA
Pubmed	23280549	Growth differentiation factor-15 (GDF-15) suppresses in vitro angiogenesis through a novel interaction with connective tissue growth factor (CCN2).	Pubmed	0.0005696	1	0.04706	0.5509	2	2	GDF15,CCN2
Pubmed	19048389	Gadd45-alpha and Gadd45-gamma utilize p38 and JNK signaling pathways to induce cell cycle G2/M arrest in Hep-G2 hepatoma cells.	Pubmed	0.0005696	1	0.04706	0.5509	2	2	GADD45G,GADD45A
Pubmed	19245215	Subunit-selective interrogation of CO recombination in carbonmonoxy hemoglobin by isotope-edited time-resolved resonance Raman spectroscopy.	Pubmed	0.0005696	1	0.04706	0.5509	2	2	HBA2,HBB
Pubmed	14691480	Gadd45beta is important for perpetuating cognate and inflammatory signals in T cells.	Pubmed	0.0005696	1	0.04706	0.5509	2	2	GADD45B,GADD45G
Pubmed	24442519	An etiologic regulatory mutation in IRF6 with loss- and gain-of-function effects.	Pubmed	0.0005696	1	0.04706	0.5509	2	2	IRF6,LEF1
Pubmed	10491170	Characterization of the ternary complex between Rab7, REP-1 and Rab geranylgeranyl transferase.	Pubmed	0.0005696	1	0.04706	0.5509	2	2	RAB7A,RABGGTB
Pubmed	31100639	Critical role of the MCAM-ETV4 axis triggered by extracellular S100A8/A9 in breast cancer aggressiveness.	Pubmed	0.0005696	1	0.04706	0.5509	2	2	MCAM,ETV4
Pubmed	25339000	Co-expression of putative cancer stem cell markers, CD133 and Nestin, in skin tumors.	Pubmed	0.0005696	1	0.04706	0.5509	2	2	NES,PROM1
Pubmed	25735334	Effect of CXCR4 and CD133 co-expression on the prognosis of patients with stage II~III colon cancer.	Pubmed	0.0005696	1	0.04706	0.5509	2	2	PROM1,CXCR4
Pubmed	17397396	Heat shock transcription factor 1 down-regulates spermatocyte-specific 70 kDa heat shock protein expression prior to the induction of apoptosis in mouse testes.	Pubmed	0.0005696	1	0.04706	0.5509	2	2	HSF1,HSPA2
Pubmed	30538005	Evidence for a protective role for the rs805305 single nucleotide polymorphism of dimethylarginine dimethylaminohydrolase 2 (DDAH2) in septic shock through the regulation of DDAH activity.	Pubmed	0.0005696	1	0.04706	0.5509	2	2	DDAH2,DDAH1
Pubmed	18439298	Overexpression of Scg5 increases enzymatic activity of PCSK2 and is inversely correlated with body weight in congenic mice.	Pubmed	0.0005696	1	0.04706	0.5509	2	2	SCG5,SOCS2
Pubmed	17322895	Hdac2 regulates the cardiac hypertrophic response by modulating Gsk3 beta activity.	Pubmed	0.0005728	1	0.04706	0.5509	4	17	ACTA1,INPP5F,NPPA,PRKACA
Pubmed	24850809	Genetic determinants of P wave duration and PR segment.	Pubmed	0.0005728	1	0.04706	0.5509	4	17	IL17D,FADS2,ARHGAP24,EXOG
Pubmed	9876177	Abrogation of the Cripto gene in mouse leads to failure of postgastrulation morphogenesis and lack of differentiation of cardiomyocytes.	Pubmed	0.0005728	1	0.04706	0.5509	4	17	MYL2,NPPA,MYL7,DES
Pubmed	19008373	Increased Foxp3(+) CD4(+) regulatory T cells with intact suppressive activity but altered cellular localization in murine lupus.	Pubmed	0.0005728	1	0.04706	0.5509	4	17	CXCL9,TNFRSF4,ITGAE,CXCR4
Pubmed	21315259	Reelin regulates cadherin function via Dab1/Rap1 to control neuronal migration and lamination in the neocortex.	Pubmed	0.0005728	1	0.04706	0.5509	4	17	MAP2,NES,CUX2,TERF2IP
Pubmed	11572777	A murine model of Holt-Oram syndrome defines roles of the T-box transcription factor Tbx5 in cardiogenesis and disease.	Pubmed	0.0005728	1	0.04706	0.5509	4	17	MYL2,NPPA,HEY1,MYL7
Pubmed	22560297	Congenital asplenia in mice and humans with mutations in a Pbx/Nkx2-5/p15 module.	Pubmed	0.0005801	1	0.0476	0.5573	12	165	CCND1,TAF10,CAMK2B,TGFB2,TGFB3,GDF6,IGFBP3,GADD45A,TMEM163,RAD9A,LTBP1,LTBP2
Pubmed	21139048	Mass spectrometric analysis of lysine ubiquitylation reveals promiscuity at site level.	Pubmed	0.0005829	1	0.04777	0.5593	14	213	DCAKD,RPS12,MRPS18B,DLGAP4,CYB5R1,ATP5PO,NACA,NARS1,NCDN,COX5B,PSMB2,RBM3,SPRYD7,TRAP1
Pubmed	29449217	ZFP36L2 is a cell cycle-regulated CCCH protein necessary for DNA lesion-induced S-phase arrest.	Pubmed	0.0005918	1	0.04839	0.5665	13	189	RPS3,RPS10,RPS18,S100A6,PABPC1,BRSK1,BANF1,NME1,NPM1,PFN1,IRF6,DLD,MAB21L1
Pubmed	20195357	A comprehensive resource of interacting protein regions for refining human transcription factor networks.	Pubmed	0.0005918	1	0.04839	0.5665	13	189	RPL27A,MAP2,ANP32B,PELP1,UQCRQ,ATP5ME,KIF1A,NAP1L1,TBCA,PCBD1,CLU,COX6C,FEZ1
Pubmed	21800051	The interaction between ubiquitin C-terminal hydrolase 37 and glucose-regulated protein 78 in hepatocellular carcinoma.	Pubmed	0.0006099	1	0.0498	0.583	9	100	H4C8,ANP32B,NACA,HBA1,HBA2,HBB,PFN1,TUBA4A,RAB7A
Interaction	int:COX4I1	COX4I1 interactions		1.052e-06	0.009643	0.007386	0.07165	26	209	GATD3A,MGST3,SCO1,MYL12A,TMBIM4,UQCRQ,ALDH4A1,ATP5PO,NDUFA2,NDUFA4,NDUFA9,NDUFA10,NDUFB1,TBCA,COX7A2L,COX14,TPM1,TPM3,PDHB,PYCR2,COX5B,COX6C,COX7A2,COX7B,COX8A,TOMM22
Interaction	int:CYC1	CYC1 interactions		1.999e-06	0.01833	0.007386	0.07165	22	164	MRPL37,MGST3,APOE,MYL12A,ATP5MG,UQCRQ,ATP5ME,ATP5PO,NDUFA4,NDUFA9,RPUSD4,COX7A2L,TPM3,PDHB,UQCR10,TUFM,NDUFAF3,COX6C,COX7A2,COX7B,COX8A,TOMM22
Interaction	int:NDUFS3	NDUFS3 interactions		3.368e-06	0.03089	0.007386	0.07165	28	250	MGST3,SCO1,APOE,MYL12A,UQCRQ,ATP5ME,ATP5PO,TMEM126B,NDUFA2,NDUFA4,NDUFA9,NDUFA10,NDUFB1,SQSTM1,COX7A2L,PCCB,COX14,PDHB,UQCR10,TUFM,NDUFAF3,COX6C,COX7A2,NDUFA11,TOMM22,DLD,TSFM,MRPL46
Interaction	int:NDUFA8	NDUFA8 interactions		4.18e-06	0.03833	0.007386	0.07165	20	146	SCO1,CHCHD6,APOE,CYB5R1,ATP5PO,NDUFA2,NDUFA4,NDUFA9,NDUFB1,GNG5,DMAC1,CAMK2B,COX14,PDHB,TUFM,NDUFAF3,COX7A2,NDUFA11,TOMM22,RAB7A
Interaction	int:COX7A2L	COX7A2L interactions		4.35e-06	0.03989	0.007386	0.07165	13	67	MGST3,MYL12A,UQCRQ,NDUFA4,NDUFA9,GNG5,COX7A2L,PDHB,COX6C,COX7A2,COX8A,TOMM22,RAB7A
Interaction	int:SCCPDH	SCCPDH interactions		4.833e-06	0.04432	0.007386	0.07165	19	135	MGST3,APOE,ATP5MG,UQCRQ,CYB5R1,ATP5PO,NDUFA4,NDUFA9,SQSTM1,GLRX,GNG5,COX7A2L,PCCB,PDHB,COX6C,COX7A2,FEZ1,TOMM22,RAB7A
Interaction	int:COX8A	COX8A interactions		8.516e-06	0.07809	0.01116	0.1082	8	26	MGST3,NDUFA4,NPM1,COX7A2L,PDHB,COX6C,COX7B,COX8A
Interaction	int:C15orf48	C15orf48 interactions		1.481e-05	0.1358	0.01698	0.1647	18	133	SLC25A6,UQCC2,MSRB2,UQCRQ,ATP5ME,ATP5PO,NDUFA2,NDUFA9,NDUFA10,NDUFB1,GNG5,COX7A2L,UQCR10,NDUFAF3,COX6C,COX7A2,COX8A,NDUFA11
Interaction	int:HADHB	HADHB interactions		2.592e-05	0.2377	0.02641	0.2562	26	249	RPS6,RPS8,SYNDIG1,MGST3,APOE,MYL12A,ATP5MG,UQCRQ,CYB5R1,NES,ATP5PO,NAP1L1,NDUFA4,NDUFA9,SQSTM1,GNG5,COX7A2L,PCCB,PDHB,GABARAPL2,COX5B,COX6C,COX7A2,COX8A,DES,RAB7A
Interaction	int:NDUFS2	NDUFS2 interactions		3.253e-05	0.2983	0.02983	0.2894	17	128	SCO1,MYL12A,UQCRQ,NDUFA4,NDUFA9,NDUFA10,SQSTM1,COX7A2L,PCCB,COX14,PDHB,NDUFAF3,COX6C,COX7A2,NDUFA11,TOMM22,DLD
Interaction	int:COX5A	COX5A interactions		4.262e-05	0.3908	0.03553	0.3447	16	118	GATD3A,MGST3,SCO1,ATP5PO,NDUFA4,TBCA,COX7A2L,COX14,TPM1,TPM3,PDHB,COX5B,COX6C,COX8A,HTRA1,KIF22
Interaction	int:UQCRB	UQCRB interactions		5.492e-05	0.5036	0.03778	0.3665	13	84	RPS10,MYL12A,UQCRQ,NDUFA4,NDUFA9,NDUFA10,NDUFB1,DMAC1,COX7A2L,PDHB,UQCR10,ATP5MPL,NDUFA11
Interaction	int:HSPB2	HSPB2 interactions		5.56e-05	0.5099	0.03778	0.3665	19	160	GATD3A,ACTA1,SLC25A5,ATP5MG,OGDHL,UQCRQ,SNCA,ATP5ME,NACA,NARS1,BGN,COX7A2L,TNNI3,HSF1,NDUFA11,CRYAB,RAB7A,DLD,HSPB8
Interaction	int:VDAC3	VDAC3 interactions		5.768e-05	0.5289	0.03778	0.3665	25	246	MCAM,MGST3,SLC25A5,APOE,MYL12A,ATP5MG,UQCRQ,CYB5R1,ATP5ME,ATP5PO,JAGN1,NAP1L1,NDUFA4,NDUFA9,GNG5,THY1,COX7A2L,PCCB,PDHB,COX6C,COX8A,DAD1,TOMM22,RAB7A,SBDS
Interaction	int:HADHA	HADHA interactions		7.456e-05	0.6837	0.04558	0.4422	24	235	RPS6,MGST3,APOE,MYL12A,ATP5MG,UQCRQ,CYB5R1,ATP5PO,CCND1,NDUFA4,NDUFA9,SQSTM1,GNG5,COX7A2L,PCCB,COX14,PDHB,GABARAPL2,COX6C,COX7A2,COX8A,MRPL40,TOMM22,RAB7A
Transcription Factor Binding Site	CTGRYYYNATT_UNKNOWN	CTGRYYYNATT_UNKNOWN		0.0001395	0.08396	0.04361	0.3043	10	53	RPL27A,CSPG5,MOAP1,NCDN,GNB3,NXPH4,COL9A1,CRYAB,GADD45A,GAB2
Transcription Factor Binding Site	CAGCTG_V$AP4_Q5	CAGCTG_V$AP4_Q5		0.0001449	0.08722	0.04361	0.3043	82	1192	ACTA1,MBP,SYNPO2L,MCAM,SKA2,EXTL1,MDK,MAP3K3,FGF1,FOXS1,AMPH,P3H3,SGCG,PLEKHA4,MACROD1,SLC1A7,AKR7A2,CHFR,NES,NACA,NDUFA4,MSTN,NCDN,RAB24,GADD45G,SUPT5H,POLL,EBNA1BP2,GNB3,SLC38A3,ADGRL3,CA3,CTXN1,DDR1,NPPA,TGFB2,TGFB3,DMC1,ATP1B4,TNNT1,PCBP2,NXPH4,ARHGAP33,TPM3,DHRS3,PACSIN3,PEX7,HMGN2,COL22A1,AGBL5,TP53INP2,PHF1,RAB33A,MYOZ1,RAB26,HJV,CRYAB,RGS6,IGFBP3,HSPB6,PRKACA,MAP2K5,IL11RA,TRPM4,MASP1,ARH…
Gene Family	657	Myosin light chains|EF-hand domain containing	genenames.org	6.896e-07	0.0001993	0.0001993	0.001245	6	14	MYL9,MYL12A,MYL2,MYL5,MYL7,MYL6B
Gene Family	728	S ribosomal proteins	genenames.org	1.763e-06	0.0005095	0.0002548	0.001591	8	34	RPS3,RPS6,RPS8,RPS10,RPS12,RPS18,RPS27A,FAU
Gene Family	643	Mitochondrial complex IV: cytochrome c oxidase subunits	genenames.org	5.586e-06	0.001614	0.0005321	0.003323	6	19	COX5B,COX6C,COX7A1,COX7A2,COX7B,COX8A
Gene Family	573	Small leucine rich repeat proteoglycans	genenames.org	7.364e-06	0.002128	0.0005321	0.003323	5	12	FMOD,BGN,OMD,ASPN,LUM
Gene Family	645	Mitochondrial respiratory chain complex assembly factors	genenames.org	6.198e-05	0.01791	0.003582	0.02237	7	40	COA5,SCO1,UQCC2,TMEM126B,COX14,NDUFAF3,SDHAF4
Gene Family	1048	BLOC-1 related complex	genenames.org	0.0008493	0.2455	0.03739	0.2335	3	8	BORCS7,BORCS8,SNAPIN
Gene Family	1150	NADH:ubiquinone oxidoreductase supernumerary subunits	genenames.org	0.0009055	0.2617	0.03739	0.2335	5	30	NDUFA2,NDUFA9,NDUFA10,NDUFB1,NDUFA11
Gene Family	644	F-type ATPases|Mitochondrial complex V: ATP synthase subunits	genenames.org	0.001213	0.3505	0.04381	0.2736	4	19	ATP5MG,ATP5ME,ATP5PO,ATP5IF1
Coexpression	19658189-TableS3	Human EmbryonicStemCell_Xu09_1311genes	GeneSigDB	1.149e-17	1.221e-13	1.221e-13	1.203e-12	95	969	MAP4,PAK4,SYNPO2L,EXTL1,ACTN2,IL17D,ACYP2,H2AC6,H2BC21,FCER1A,MYL9,MGST3,AEBP1,H4C8,SCN2B,KLHDC8B,SORBS2,SGCA,PPFIA4,SHB,ITGA10,ARHGAP1,PACS1,MARK4,GHITM,MPC1,SMARCD3,TRAK2,SNCA,CYB5R1,NES,ATP6V1G2,ADAM19,MYL2,GATM,DYRK4,MOAP1,LIN7B,NKG7,DCLK2,ACOT2,NPPA,RBPMS,CAMK2B,CAPN3,PTPN21,TEAD3,TGFB2,PKIG,ATP1B4,CORO6,TNNI3,PCBD1,EDA2R,FRMD3,TPD52L1,TPM1,COL22A1,PPP1R15A,PFKP,TP53INP2,MYL7,DUSP26,MRPL57,D…
Coexpression	19658189-TableS5	Human EmbryonicStemCell_Xu09_622genes	GeneSigDB	1.213e-10	1.29e-06	2.58e-07	2.541e-06	50	483	MAP4,SYNPO2L,ACTN2,H2BC21,FCER1A,MYL9,MGST3,SCN2B,SORBS2,SGCA,PPFIA4,MPC1,SMARCD3,TRAK2,CYB5R1,MYL2,MOAP1,NKG7,ACOT2,NPPA,CAMK2B,CAPN3,PTPN21,PKIG,CORO6,TNNI3,PCBD1,FRMD3,TPM1,PPP1R15A,TP53INP2,MYL7,DUSP26,ICA1,PNKD,CRYAB,CTF1,MASP1,ARHGAP24,CYP2J2,SMYD2,JAK2,DES,KCNMB1,MFN2,HSPB8,TSC22D3,TSPAN32,ACE2,RASSF4
Coexpression	16651414-Supp2	Human Breast_Bertucci06_2537genes	GeneSigDB	1.333e-09	1.417e-05	1.575e-06	1.551e-05	110	1624	RPS3,TCEAL4,RPS6,MRPL37,RPS10,RPS12,TNIP1,RPS18,RPS27A,S100A6,S100A13,FAU,CYS1,MYL9,MGST3,AEBP1,PTRHD1,CXCL9,RPL22L1,GPNMB,SFRP4,FMOD,GLRX3,TMEM134,APOE,AZIN1,ATP5MG,MSRB2,SCUBE2,TMBIM4,CCDC74A,GHITM,NECAB3,SMARCE1,UQCRQ,IAH1,EIF3I,IFI6,CYB5R1,ATP5ME,ADAM19,ATP5PO,NACA,CCND1,NDUFA2,NDUFA4,NDUFA9,NDUFB1,ADA2,DPM1,MOAP1,BGN,COMMD6,STAU1,RPL10A,PRRT3,OSGIN2,UQCR11,TBCA,ELOB,TXNDC17,RUNX2,THY1,POLR1E…
Coexpression	16872506-SuppTable1	Human Leukemia_Yukinawa06_2000genes	GeneSigDB	1.523e-07	0.00162	6.75e-05	0.0006648	97	1505	RPL27A,LYPLAL1,RPS3,TCEAL4,RPS8,RPS18,RPS27A,S100A13,FAU,TADA3,FMOD,SLC25A5,ANP32B,PLEKHA4,MACROD1,PABPC1,MSRB2,BEX3,GHITM,UQCRQ,EIF3I,IFI6,ATP5PO,NACA,NAP1L1,NARS1,CCND1,BCL2,NDUFA2,NDUFA10,RPL10A,PROM1,SUPT5H,SQSTM1,EBNA1BP2,NME1,UQCR11,TAF10,GNG5,TBCA,NPM1,ELOB,RBPMS,TXNDC17,ODC1,SYNGR2,PCBP2,TPM3,HGD,DDAH2,DHRS3,PDHB,VPS45,ENPP2,MKRN2,HMGN2,PPP1R15A,PFN1,TUFM,PIK3IP1,UBB,SERPINE2,CLIC1,CBY1,U…
Coexpression	19843711-TableS1	Human Kidney_Sallustio10_2134genes_DiscriminatedARPCsFromRPTEC/MSC	GeneSigDB	4.595e-07	0.004886	0.0001879	0.001851	104	1688	RPL27A,RIN3,COPZ2,MAP4,USP11,MBP,PI4K2A,TNIP1,PRR16,MFAP2,MFAP4,MYL9,C1QTNF3,GPNMB,SFRP4,SLC25A5,SLC25A6,PHLDA1,SCG5,SEC31A,APOE,AKR7A2,BEX3,MT2A,RNASET2,ZSCAN18,OGDHL,RASL11B,MPC1,GADD45B,NAP1L1,CCND1,BCL2,NDUFA2,NDUFA10,MOAP1,BGN,PROM1,PER2,SQSTM1,GNG5,DDR1,NPR3,RBPMS,TEAD3,TGFB2,THY1,SYNGR2,PCBD1,PCCB,TPM1,DDAH2,MGAT4B,DDAH1,VPS45,ENPP2,PENK,PFDN1,HMGCL,PPP1R15A,UQCR10,TERF2IP,ITGBL1,UBB,SERPI…
Coexpression	17192395-TableS2b	Human StemCell_Macaulay07_516genes	GeneSigDB	5.089e-07	0.005413	0.0002001	0.001971	42	483	TCEAL4,RRAS,MDK,FCER1A,MED12L,DLGAP4,MYL12A,MSRB2,SNCA,SNRPN,CCND1,TSPAN9,TCEA2,NPR3,PYROXD2,PDLIM1,TM7SF2,HGD,DDAH2,PFKP,TUBA4A,RAB33A,SERPINE2,CLU,CLIC1,SDF2L1,TRAPPC6A,SPATA20,PNKD,TRPM4,RIPOR2,NEURL2,DAD1,DBP,NT5M,CXCR4,TSC22D3,AKIRIN2,TSPAN32,ST8SIA2,LTBP1,HSD17B14
Coexpression	17660535-TableS4b	Mouse InnerEar_Sajan08_2230genes	GeneSigDB	5.269e-07	0.005604	0.0002001	0.001971	116	1948	DCAKD,USP11,RPS6,RPS8,MCAM,IER5,TNIP1,MDK,ACYP2,F2RL2,MAP3K3,AFMID,MYL9,GTF2IRD2,AMPH,SFRP4,NUDT14,GLRX3,MRPS18B,SCG5,DLGAP4,PLEKHA4,APOE,LYAR,TARS2,RND3,ARHGAP1,BEX3,ARL2,PELP1,FRZB,RASL11B,SMARCD3,ALDH4A1,IAH1,SNCA,FSCN1,SNRPN,GADD45B,NES,B4GALNT1,NAP1L1,NAP1L3,SMOC2,NDUFA9,RRAGC,H2AW,RAB24,PER3,NSFL1C,PER2,GLRX,GNG5,DDR1,CUX2,RBPMS,TRIM41,SHISA2,PTPN21,CBLN1,TGFB2,TGFB3,GTF2B,PDLIM1,HEY1,POLR1…
Coexpression	19843711-TableS2	Human Kidney_Sallustio10_2134genes_CompleteListAnalysis	GeneSigDB	5.587e-07	0.005942	0.0002049	0.002018	103	1674	RIN3,COPZ2,MAP4,USP11,MBP,PI4K2A,TNIP1,PRR16,MFAP2,MFAP4,MYL9,C1QTNF3,GPNMB,SFRP4,SLC25A5,SLC25A6,PHLDA1,SCG5,SEC31A,APOE,AKR7A2,BEX3,MT2A,RNASET2,ZSCAN18,OGDHL,RASL11B,MPC1,GADD45B,NAP1L1,CCND1,BCL2,NDUFA2,NDUFA10,MOAP1,BGN,PROM1,PER2,SQSTM1,GNG5,DDR1,NPR3,RBPMS,TEAD3,TGFB2,THY1,SYNGR2,PCBD1,PCCB,TPM1,DDAH2,MGAT4B,DDAH1,VPS45,ENPP2,PENK,PFDN1,HMGCL,PPP1R15A,UQCR10,TERF2IP,ITGBL1,UBB,SERPINE2,AP2…
Coexpression	20937356-TableS1	Rat Hypothalamic_Mansuy10_1270genes	GeneSigDB	7.42e-07	0.007891	0.0002436	0.0024	64	894	LYPLAL1,USP11,TNIP1,EXT1,S100A1,AEBP1,GPNMB,ALDH3B1,SFRP4,NUDT14,PLEKHA4,APOE,RND3,FRZB,RNASET2,OGDHL,RASL11B,BRSK1,GADD45B,PSENEN,ARID5A,ADHFE1,SULT1A1,FIBIN,GLRB,SLC38A3,NOL3,PYROXD2,ESM1,TEAD3,OMD,TGFB2,THY1,PAFAH2,TM7SF2,FIBP,TPM1,HGD,DDAH2,DHRS3,PENK,PHF1,ITGBL1,CLU,FADS2,TRAPPC6A,COL16A1,CCDC28A,XPA,CLIP3,ISG15,MASP1,DCAF8,DBP,GAB2,JAK2,DIO2,WIPI1,HIGD2A,EDNRA,LSP1,LTBP2,LEF1,TMEM140
Coexpression	19658189-TableS9b	Human EmbryonicStemCell_Xu09_100genes	GeneSigDB	1.119e-06	0.0119	0.0003499	0.003446	15	89	ACTN2,MYL9,KLHDC8B,SHB,NES,MYL2,NPPA,PTPN21,TNNI3,TPM1,MYL7,GADD45A,JAK2,KCNMB1,HSPB8
Coexpression	15284076-TableE2	Human Lung_not_cancer_Golpon04_242genes	GeneSigDB	1.455e-06	0.01547	0.000442	0.004354	24	210	MAP4,RPS6,RPS27A,SLC25A5,SLC25A6,ANP32B,ALDH4A1,NACA,NAP1L1,NDUFA4,YIF1A,TGFB2,GYS1,PDHB,COX5B,COX6C,COX7A2,COX7B,COX8A,PSMB2,DLD,RABGGTB,CLEC2B,RAD23A
Coexpression	18081427-TableS8	Mouse Breast_Crawford07_981genes	GeneSigDB	2.041e-06	0.02171	0.000559	0.005505	51	673	MNS1,IER5,RRAS,AEBP1,GPNMB,NUDT14,CHCHD6,BEX3,B9D1,SNRPN,DTD1,BCL2,TSPAN9,ADHFE1,RAB24,PER2,GLRB,GLRX,ACOT2,OSCP1,DDR1,RBPMS,TMED4,TGFB3,PKIG,SH3D19,TPD52L1,SNAPIN,PEX7,PIK3IP1,SERPINE2,HSPA2,TRAPPC6A,VEGFB,TOMM7,CCDC28A,HACL1,TRPM4,DCAF8,DBP,GADD45A,IVD,CXCR4,MFN2,GATD1,AGTRAP,TSC22D3,RENBP,LSP1,GPA33,TMEM140
Coexpression	12917485-Table8	Human Breast_Sotiriou03_706genes	GeneSigDB	2.428e-06	0.02583	0.0006299	0.006204	42	513	EXT1,H2BC21,AEBP1,CXCL9,GPNMB,SFRP4,SLC25A5,SIAH2,BEX3,MT2A,FRZB,IFI6,GATM,BCL2,NDP,PROM1,FASTK,GLRX,NKG7,DDR1,ODC1,CBLN1,PCBP2,HMGB2,PFKP,TYRP1,ITGBL1,SERPINE2,UCHL1,GDF15,CLIP3,IGFBP3,ISG15,CYP11A1,CXCR4,RAB7A,HSPB8,S1PR1,EDNRA,EFNA1,LTBP2,LUM
Coexpression	16293578-SuppTable2	Human StemCell_Cai06_1370genes	GeneSigDB	2.759e-06	0.02934	0.0006985	0.00688	77	1190	ACTA1,ETV4,EXT1,RRAS,IL17D,MDK,NPM3,S100A6,MFAP4,MYL9,AEBP1,LYAR,AZIN1,EFHD1,FRZB,CCDC74A,RASL11B,MPC1,SMARCD3,SNCA,IFI6,SNRPN,CYB5R1,GADD45B,LAYN,GATM,DYRK4,NMRK2,BGN,SULT1A1,ADGRL3,PYROXD2,CLIC6,LEFTY2,PKIG,HEY1,PRAF2,TNNI3,TPD52L1,SDSL,ENPP2,CHN1,PLA2G15,TUBA4A,TERF2IP,MYL7,CTHRC1,PYCR2,HSPA2,RAB26,COL16A1,PPDPF,ICA1,XPA,PNKD,CRYAB,CLIP3,CRYM,IGFBP3,HSPB6,HACL1,IL11RA,MASP1,HTRA1,IRF6,GADD45A,…
Coexpression	15774477-Table2	Rat StemCell_KaplanAlbuquerque_98genes	GeneSigDB	6.52e-06	0.06934	0.001541	0.01518	11	56	MAP2,MYL9,FOXS1,RND3,SNRPN,NPR3,OMD,TGFB3,PDLIM1,ASPN,MAFK
Coexpression	19306436-TableS2a	Human Stomach_Zhao09_324genes	GeneSigDB	7.307e-06	0.07772	0.001596	0.01572	29	310	ETV4,F2R,F2RL2,MFAP2,GPNMB,SFRP4,BGN,OSGIN2,ESM1,SHISA2,TGFB2,THBS4,THY1,PFDN4,CHN1,ITGBL1,CTHRC1,IGFBP3,CST2,KIAA1755,ASPN,DIO2,CRISPLD1,PLXDC1,EDNRA,FARP1,LTBP2,LUM,LEF1
Coexpression	19643001-Additional-File2	Rat Breast_Giusti09_300genes	GeneSigDB	8.256e-06	0.0878	0.001689	0.01663	20	172	RPS6,ACTA1,ACTN2,MPC1,UQCRQ,ATP5ME,ATP5PO,NDUFA4,NDUFA9,UQCR11,TNNI3,HBB,TPM1,CLU,COX5B,COX6C,COX7B,CRYAB,HSPB6,DES
Coexpression	20460173-ImmPortCD40LandAnti-IgMvsControl	Human Immune_Kong10_2491genes_ImmPort_CD40LandAnti-IgMvsControl	GeneSigDB	8.544e-06	0.09087	0.001714	0.01689	94	1586	TSR2,RPS6,ACYP2,MEA1,NPM3,FAU,MGST3,GPNMB,SORBS2,SLC25A6,SIAH2,AZIN1,AKR7A2,ATP5MG,CSPG5,UQCRQ,ST6GALNAC4,SNRPN,DOK5,GADD45B,ATP5ME,ADAM19,ATP5PO,MYL5,NARS1,BBS4,CCND1,BCL2,NDUFA2,LSM3,YIF1A,NSFL1C,SQSTM1,GLRX,MLLT11,OSGIN2,UQCR11,CUX2,RBPMS,SYNGR2,TM7SF2,FIBP,COX7A2L,PCCB,TPM3,DDAH2,PDHB,PENK,HMGB2,PFDN1,GABARAPL2,PFDN4,PPP1R15A,PLA2G15,TUBA4A,TUFM,PHF1,CLU,CLIC1,UCHL1,MYL6B,UCP2,QPCT,PRMT2,DNAJ…
Coexpression	19074870-SuppTable4a	Human StemCell_Harris08_490genes	GeneSigDB	8.95e-06	0.09518	0.001763	0.01736	34	398	ACTA1,MBP,MCAM,ETV4,F2R,S100A1,S100A6,S100A13,FGF1,GPNMB,FMOD,SGCA,SCG5,APOE,FRZB,SNCA,BGN,CAPN3,GRIA3,SH3D19,TPD52L1,DHRS3,ENPP2,HMGB2,UCP2,COL9A1,PPP2R2B,PRKACA,CTF1,CYP2J2,ASPN,IRF6,RAD9A,EFNA1
Coexpression	15532095-Table3	Human Prostate_Kristiansen05_188genes	GeneSigDB	1.046e-05	0.1112	0.001986	0.01956	16	119	S100A6,FGF1,FMOD,NME1,NPM1,ODC1,TGFB3,PDLIM1,ENPP2,PENK,CHN1,CLU,CRYAB,TRPM4,DES,EFNA1
Coexpression	14749371-Table2	Human Viral_Scott04_135genes	GeneSigDB	1.11e-05	0.1181	0.002036	0.02005	17	133	MDK,MFAP4,AMPH,FMOD,RND3,DOK5,TPM1,ENPP2,PENK,COL16A1,IGFBP3,CCN2,EDNRA,FARP1,LTBP1,LTBP2,LUM
Coexpression	20713713-TableS1b	Human Breast_Taube10_91genes_EMTsignature_up	GeneSigDB	1.509e-05	0.1605	0.002675	0.02635	13	84	COPZ2,PRR16,MYL9,BGN,THY1,TPM1,ENPP2,CHN1,FADS2,IGFBP3,CCN2,LTBP1,LTBP2
Coexpression	15665281-Table5	Human Brain_Wong05_31genes	GeneSigDB	1.641e-05	0.1746	0.002815	0.02773	6	16	MBP,RND3,ESM1,COL9A1,IGFBP3,CCN2
Coexpression	15505275-SuppTable4	Human Ovarian_Spentzos04_115genes	GeneSigDB	2.911e-05	0.3096	0.004361	0.04295	14	102	RPS12,MFAP4,FMOD,SAMD4A,MYBL1,NAP1L3,MLLT11,NPR3,PAFAH2,TPM1,COL16A1,COX7A2,CCN2,CYP2J2
Coexpression	17009876-tableS1a	Mouse StemCell_Ramos06_1482genes	GeneSigDB	3.333e-05	0.3544	0.004855	0.04782	68	1089	RPS6,RPS12,PI4K2A,MCAM,ETV4,ACYP2,S100A1,FAU,AEBP1,SGCA,GLRX3,ANP32B,CHCHD6,APOE,ARL2,CDC26,CHFR,RASL11B,MPC1,FSCN1,NES,CPLX1,NAP1L1,HCN2,BGN,LIN7B,GLRX,TCEA2,RBPMS,GPR27,TRIM41,GRID1,ODC1,PTPN21,RUNX2,CBLN1,TGFB3,GTF2B,PAFAH2,TM7SF2,PCBD1,SDSL,DDAH2,VPS45,PENK,PFN1,TUBA4A,UBB,RAB33A,DNAJB2,TOMM7,COX7B,ATF6B,PPP4C,RGS6,PRKACA,SMYD2,DNAAF5,KCNE1,CXCR4,DLD,HSPB8,KIF22,AKIRIN2,RENBP,STMN1,ORMDL3,EFN…
Coexpression	18691415-Table5a	Human Colon_Solmi08_34genes	GeneSigDB	3.727e-05	0.3964	0.005286	0.05206	7	26	MBP,MGST3,CHCHD6,ATP5MG,KIF1A,GPR27,AP2S1
Coexpression	15845616-SuppTable3	Mouse Uterine_Jeong05_634genes	GeneSigDB	3.885e-05	0.4132	0.005366	0.05285	37	482	ACTA1,MDK,F2R,S100A6,AEBP1,FGF1,C1QTNF3,APOE,GADD45B,GATM,CCND1,BCL2,NDP,NDUFA4,BGN,PROM1,GLRB,NME1,NPR3,THY1,ENPP2,SERPINE2,CLU,DNAJB2,COL9A1,POLR2E,ATF6B,FEZ1,CCN2,TMEM30B,RIPOR2,DES,CXCR4,EFNA1,SBDS,LSP1,LUM
Coexpression	18535662-TableS1a	Mouse Lymphoma_Wu08_1813genes	GeneSigDB	4.305e-05	0.4579	0.00587	0.05782	59	913	COPZ2,ACTA1,MIF4GD,EXT1,RRAS,AMZ2,S100A1,S100A6,S100A13,MFAP4,MGST3,C1QTNF3,TADA3,SEC31A,ARHGAP1,BEX3,TMBIM4,IAH1,CYB5R1,SMOC2,DPM1,TSPAN9,RRAGC,YIF1A,GLRX,RAB12,NPR3,GRIA3,TMED4,POLR1E,ISCU,COX7A2L,PRAF2,TPM1,SNAPIN,DDAH2,TMC6,PENK,GABARAPL2,COL22A1,PPP1R15A,YPEL1,PLA2G15,PIK3IP1,SERPINE2,CLIC1,PRMT2,TRAPPC6A,DNAJC4,CLIP3,HACL1,TRNP1,PSMD8,ITGAE,NT5M,JAK2,AGTRAP,RENBP,UCMA
Coexpression	12941627-table1b	Mouse StemCell_Karsten03_39genes	GeneSigDB	4.702e-05	0.5001	0.006234	0.0614	8	36	MDK,S100A1,S100A6,CXCL9,GADD45B,TUBA4A,CRYAB,ST8SIA2
Coexpression	15720420-Figure1	Human Sarcoma_Cecco05_31genes	GeneSigDB	4.869e-05	0.5178	0.006301	0.06206	7	27	AEBP1,SFRP4,BGN,GLRX,ELOB,CLU,LUM
Coexpression	19036130-TableS1a	Mouse Viral_Mendoza-Villanueva08_1830genes	GeneSigDB	6.25e-05	0.6647	0.007178	0.0707	89	1561	COPZ2,B3GNT5,RPS6,MBP,RRAS,ACYP2,F2R,NPM3,S100A1,S100A13,MFAP2,H2AC6,MFAP4,AEBP1,H4C8,CXCL9,GPNMB,SFRP4,FMOD,SLC25A5,PI16,SGCA,SGCG,ANP32B,LMOD2,PABPC1,FRZB,RASL11B,MPC1,SMARCD3,CYB5R1,ADAM19,GATM,SMOC2,ADHFE1,SULT1A1,NME1,SLC38A3,NPR3,RBPMS,NOL3,CAPN3,OMD,TGFB2,PKIG,THY1,TPM1,DDAH2,CENPA,ENPP2,HMGB2,TYRP1,ITGBL1,SERPINE2,MYOZ1,CLU,QPCT,MDFIC,COX7A1,CRYAB,CRYM,PPP4C,IGFBP3,ISG15,FEZ1,HTRA1,ASPN,I…
Coexpression	14973550-SuppTable2	Human Colon_Bertucci04_244genes	GeneSigDB	6.497e-05	0.691	0.007178	0.0707	21	214	COPZ2,RPS6,RPS8,SCO1,SORBS2,NDUFA4,NDUFA9,RPL10A,NME1,UQCR11,CA3,NPM1,CAMK2B,COX7A2L,TPM1,COX5B,COX7A2,COX7B,ZFPL1,DAD1,RPL5
Coexpression	17952122-GeneList	Human Breast_Vecchi08_792genes	GeneSigDB	6.632e-05	0.7054	0.007178	0.0707	40	551	MBP,F2RL2,H2AC6,CXCL9,GPNMB,SFRP4,ANP32B,SCG5,RND3,ZSCAN18,DOK5,BCL2,SMOC2,NDUFB1,ADA2,PROM1,RBPMS,ODC1,OMD,HEY1,HBA1,HBB,TPD52L1,TPM1,CHN1,ITGBL1,UCP2,CTHRC1,MDFIC,IGFBP3,CCN2,HTRA1,RIPOR2,ASPN,CXCR4,DIO2,EDNRA,LUM,IRX2,LEF1
Coexpression	19408105-SuppTable4	Mouse Breast_Stein09_1780genes	GeneSigDB	6.851e-05	0.7286	0.007178	0.0707	38	514	ETV4,S100A13,MGST3,APOE,AZIN1,ARHGAP1,UQCRQ,B4GALNT1,GATM,RRAGC,RAB24,SQSTM1,RAB12,RBPMS,TGFB3,THY1,PDLIM1,TM7SF2,TPM1,DDAH2,DHRS3,PDHB,UBB,CLU,CLIC1,VEGFB,ICA1,COX7A2,CSTB,CCN2,DAD1,GADD45A,KCNJ4,KLC1,ATP5IF1,EFNA1,LSP1,LUM
Coexpression	18272519-Table1	Mouse SkeletalMyoblasts_Biswas08_25genes	GeneSigDB	6.979e-05	0.7422	0.007178	0.0707	6	20	MCAM,SNCA,TGFB2,PFKP,COX7A1,CCN2
Coexpression	16115948-Table2	Human Ovarian_Okamoto05_44genes	GeneSigDB	7.108e-05	0.756	0.007178	0.0707	8	38	RPS6,RPL10A,UQCR11,TAF10,PCBP2,MRPL57,PSMB2,RAD23A
Coexpression	17683518-193GeneTable	Human Breast_Teschendorff07_193genes_Erpos	GeneSigDB	7.424e-05	0.7896	0.007178	0.0707	18	169	TRAPPC4,MT2A,SCUBE2,ATP5PO,NDUFA4,TBCA,NPM1,SLC16A5,HMGB2,HMGCL,FADS2,COX6C,CCN2,CYP2J2,ASPN,ATP5IF1,RBM3,LTBP1
Coexpression	18413728-Table2a	Human Brain_Molenaar08_69genes	GeneSigDB	7.561e-05	0.8041	0.007244	0.07135	10	60	TIGD1,H2BC21,H4C8,SCG5,LIN7B,LNP1,TM7SF2,ENPP2,ZNF610,PPCS
Coexpression	16288009-SuppTable2	Human StemCell_Moreno05_297genes	GeneSigDB	7.764e-05	0.8258	0.007308	0.07197	24	266	H2BC21,SORBS2,INPP5F,CSPG5,SMARCD3,CYB5R1,GADD45B,BCL2,NCDN,MLLT11,GNB3,ADGRL3,ODC1,THBS4,TM7SF2,SEZ6L,FADS2,HSPA2,CRYAB,CLIP3,IGFBP3,IGSF1,CYP11A1,CXCR4
Coexpression	20630075-AF-3	Mouse StemCell_GarciaEscudero10_311genes_p53	GeneSigDB	0.0001598	1	0.01278	0.1259	21	228	ACTA1,MBP,SYNPO2L,ACTN2,ACYP2,SGCA,SGCG,MACROD1,LMOD2,SCUBE2,EFHD1,ADHFE1,PTPN21,ATP1B4,MYOZ1,HJV,COX7A1,CRYAB,HSPB6,DES,EDN3
Coexpression	18332228-Table2	Human StemCell_Ng08_33genes	GeneSigDB	0.0001923	1	0.01457	0.1435	7	33	MFAP4,AEBP1,BGN,TGFB3,CLU,CRYAB,MASP1
Coexpression	15785748-Table3	Human Uterine_Santin05_178genes	GeneSigDB	0.0001944	1	0.01457	0.1435	16	151	MFAP4,SFRP4,FRZB,NAP1L3,BCL2,SOCS2,LEFTY2,THBS4,HBB,ENPP2,HSPB6,RIPOR2,DES,KCNMB1,EDNRA,LUM
Coexpression	19861896-SuppTable1	Human Brain_Castells09_424gebes	GeneSigDB	0.0002084	1	0.01457	0.1435	29	373	LYPLAL1,RPS6,ACTN2,MYL9,ITGA10,MYL12A,MT2A,FRZB,SMARCD3,CCND1,RPL10A,SOCS2,SULT1A1,SUPT5H,OMD,THBS4,THY1,DHRS3,PLEKHB1,TUBA4A,RAB33A,CRYAB,CLIP3,CCN2,CYP11A1,JAK2,STMN1,S1PR1,LTBP2
Coexpression	15790779-Table1	Human BoneMarrow_Jeong04_47genes	GeneSigDB	0.0002109	1	0.01457	0.1435	8	44	THY1,TPM1,CTHRC1,GDF15,CRYAB,CCN2,HTRA1,LUM
Coexpression	16470729-Table1	Human Development_Farina06_10genes	GeneSigDB	0.0002179	1	0.01457	0.1435	4	9	EXTL1,SFRP4,ITGA10,EDN3
Coexpression	12456497-Table4	Human Leukemia_Durig03_88genes	GeneSigDB	0.0002254	1	0.01489	0.1466	11	81	RPS3,RPS6,RPS8,RPS10,RPS12,RPS18,RPS27A,SLC25A6,ANP32B,RPL10A,PCBP2
Coexpression	17483324-Table1	Human Colon_Hellebrekers07_81genes	GeneSigDB	0.0002254	1	0.01489	0.1466	11	81	F2RL2,APOE,IFI6,TGFB2,SERPINE2,CLU,UCP2,CLIP3,IGFBP3,GADD45A,P3H2
Coexpression	18794137-SuppTable1a	Human Breast_Creighton08_772genes	GeneSigDB	0.000232	1	0.01523	0.15	36	507	MAP4,TCEAL4,RPS12,RPL22L1,SLC27A6,ANP32B,SIAH2,MSRB2,ARL2,SCUBE2,EFHD1,MYBL1,DTD1,ATP5PO,BCL2,FAM120AOS,COMMD6,SOCS2,RBPMS,DOK7,PYROXD2,TNNT1,TPD52L1,TPM3,HMGB2,PRMT2,HOMER3,MDFIC,TKFC,FEZ1,IGSF1,ARHGAP24,PHF19,SYTL5,LTBP1,IRX2
Coexpression	18006812-TableS1	Human Lymphoma_Piccaluga07_260genes	GeneSigDB	0.0002797	1	0.01806	0.1779	19	204	RRAS,MFAP4,MYL9,CXCL9,GPNMB,APOE,RND3,P2RY13,RBPMS,THY1,TPM1,ENPP2,CLU,CTHRC1,COX7A1,TMEM163,HSPB8,LUM,RASSF4
Coexpression	19658189-TableS8d	Human EmbryonicStemCell_Xu09_85genes	GeneSigDB	0.0002803	1	0.01806	0.1779	11	83	SCN2B,ATP5ME,ATP6V1G2,ATP5PO,NDUFA9,HCN2,ABCC8,ATP1B4,SLC30A2,KCNJ4,KCNMB1
Coexpression	20460173-ImmPortAnti-IgMvsControl	Human Immune_Kong10_1790genes_ImmPort_Anti-IgMvsControl	GeneSigDB	0.0003	1	0.01899	0.1871	67	1152	TSR2,TNIP1,RPS18,ACYP2,GPNMB,SORBS2,SLC25A6,PHLDA1,ANP32B,RNF126,AKR7A2,ATP5MG,MT2A,CSPG5,UQCRQ,GADD45B,ATP5ME,NARS1,BBS4,CCND1,BCL2,BANF1,ARID5A,NCDN,LSM3,SQSTM1,GLRX,NKG7,ADGRL3,ELOB,CUX2,ODC1,COX7A2L,PCCB,DDAH2,TMC6,PEX7,HMGB2,PFDN1,GABARAPL2,PPP1R15A,PLA2G15,TUBA4A,CLIC1,MYL6B,QPCT,PRMT2,DNAJB2,ANAPC13,VEGFB,TOMM7,LETMD1,COX6C,COX8A,CSTB,MAP2K5,DCAF8,DELE1,ITGAE,GADD45A,CLEC2B,MAFK,MYOZ3,STMN…
Coexpression	17575140-Table1	Human Prostate_Verona07_41genes	GeneSigDB	0.0003405	1	0.02143	0.211	7	36	ACTA1,ADAM19,TPM1,SERPINE2,CLU,CCN2,LTBP2
Coexpression	12917485-Table9	Human Breast_Sotiriou03_485genes_Survival	GeneSigDB	0.0004177	1	0.02482	0.2444	29	389	RPS10,IMPACT,EXT1,AMPH,SLC25A5,SLC25A6,PHLDA1,FRZB,NAP1L3,GATM,BCL2,NDP,SOCS2,YIF1A,MICA,ODC1,OMD,TGFB3,TUBA4A,ITGBL1,AP2S1,MYL6B,UCP2,PNKD,STAG3L4,DCAF8,CYP2J2,ITGAE,NPRL3
Coexpression	19181379-Table2	Mouse Viral_Pekova09_25genes	GeneSigDB	0.0004298	1	0.02539	0.2501	5	18	H2AC6,H2BC21,H2AW,GADD45G,GADD45A
Coexpression	15831674-Table2	Human Breast_Itoh05_92genes	GeneSigDB	0.0004434	1	0.02605	0.2566	9	61	RND3,SOCS2,CLU,GDF15,ISG15,IRF6,GADD45A,TSC22D3,EFNA1
Coexpression	15150091-Table3	Human Leukemia_Schaefer04_38genes	GeneSigDB	0.0004821	1	0.02751	0.271	7	38	FSCN1,TM7SF2,CHN1,UCHL1,UCP2,FADS2,ISG15
Coexpression	17899370-Table2	Human Breast_Singer08_06genes	GeneSigDB	0.0005057	1	0.02751	0.271	3	5	RUNX2,TPM1,HSF1
Coexpression	15632314-Table1b	Human Leukemia_Takagaki04_30genes_DownRegulated	GeneSigDB	0.000524	1	0.02751	0.271	6	28	RPS3,RPS6,SCO1,PABPC1,EBNA1BP2,GTF2B
Coexpression	17297478-SuppTable6	Human Intestine_Vecchi07_369genes	GeneSigDB	0.0005385	1	0.02751	0.271	22	267	GPNMB,SFRP4,CHCHD5,BGN,SULT1A1,ESM1,THBS4,HEY1,HBA1,HBB,HGD,ITGBL1,CTHRC1,COX8A,SPATA20,IGFBP3,DDT,CRISPLD1,EDNRA,FARP1,LTBP2,GPA33
Coexpression	17297478-SuppTable2	Human Intestine_Vecchi07_415genes	GeneSigDB	0.0005448	1	0.02751	0.271	24	303	GPNMB,SFRP4,CHCHD5,BGN,SULT1A1,ESM1,THBS4,HEY1,UBE2QL1,HBA1,HBB,PCBD1,HGD,ITGBL1,CTHRC1,COX8A,SPATA20,IGFBP3,DDT,CRISPLD1,EDNRA,FARP1,LTBP2,GPA33
Coexpression	16434974-Table3	Human StemCell_Enk06_67genes	GeneSigDB	0.0005658	1	0.02751	0.271	9	63	H2BC21,GADD45B,BCL2,MOAP1,PPP1R15A,XPA,IGFBP3,DAPK3,GADD45A
Coexpression	15474998-tableS1a	Mouse StemCell_Lindmark04_624genes	GeneSigDB	0.000576	1	0.02751	0.271	34	493	TNIP1,RRAS,S100A1,S100A6,MGST3,GLRX3,CYB5R1,GADD45B,CCND1,NDUFA2,COMMD6,GLRX,UQCR11,NPM1,ELOB,GRK6,P2RX1,PDLIM1,TPM1,DDAH2,DHRS3,UQCR10,AP2M1,COX6C,COX7A2,COX7B,UBALD2,CSTB,GADD45A,IVD,ATP5IF1,RBM3,ZDHHC14,LSP1
Coexpression	19505326-SuppTable3	Human Ovarian_Li09_2322genes_cisplatinresistance	GeneSigDB	0.000577	1	0.02751	0.271	95	1804	MCAM,IER5,RPS18,RPS27A,IL17D,F2R,F2RL2,AMZ2,PRR16,CRACD,H2BC21,MYL9,SCN2B,SLC27A6,PHLDA1,SGCG,KLF15,APOE,LYAR,PABPC1,ZNF365,AKR7A2,MT2A,CSPG5,RNASET2,RASL11B,UQCRQ,SNCA,SAMD4A,MYBL1,GADD45B,NES,ATP5PO,MYL5,JAGN1,NAP1L3,GATM,NDUFA2,NDUFA9,LSM3,H2AW,GLRX,KCNMB4,MICA,MLLT11,ADGRL3,NPM1,TCEA2,DDR1,CAPN3,PTPN21,PDLIM1,HEY1,ZNF277,SYNGR2,PAFAH2,COX7A2L,FRMD3,TPM1,TPM3,PDHB,PFDN4,PPP1R15A,PFKP,PFN1,TUFM…
Coexpression	18310505-TableS8	Human StemCell_Matushansky08_297genes	GeneSigDB	0.0005954	1	0.02751	0.271	22	269	MCAM,TNIP1,RRAS,S100A1,MYL9,FGF1,MT2A,GHITM,CYB5R1,GADD45B,BCL2,SOCS2,GLRX,DDR1,RBPMS,HBA1,HBB,DHRS3,PPP1R15A,VEGFB,ICA1,CRYAB
Coexpression	16284748-TableS4	Rat Bone_Voss05_78genes	GeneSigDB	0.0006006	1	0.02751	0.271	8	51	RPL22L1,FMOD,PACS1,MT2A,THBS4,TPD52L1,TPM1,NDUFAF3
Coexpression	20599952-Table1	Human BoneMarrow_Maisel10_105genes	GeneSigDB	0.0006028	1	0.02751	0.271	12	105	MBP,GPNMB,SCG5,EFHD1,NES,PROM1,TPM1,ITGBL1,CLU,FEZ1,CCN2,EDNRA
Coexpression	17483295-TableS1	Human Lymphoma_Knoops07_201genes	GeneSigDB	0.0006589	1	0.02969	0.2924	13	121	IER5,CXCL9,GPNMB,APOE,RAB20,HAAO,EDA2R,CENPA,ENPP2,GDF15,GADD45A,JAK2,KIF22
Coexpression	16611997-SuppTable1	Mouse StemCell_Affar06_525genes	GeneSigDB	0.0006976	1	0.03117	0.307	31	440	IL17D,FMOD,SLC25A5,RND3,SNRPN,NAP1L3,LIN7B,PER3,GADD45G,GRIA3,CBLN1,TGFB2,THBS4,THY1,PAFAH2,TNNI3,TPD52L1,TPM1,CENPA,HMGB2,PPP1R15A,CLU,UCHL1,FADS2,CRYAB,HACL1,MASP1,KIF22,STMN1,EDNRA,LUM
Coexpression	15985538-TableS1	Mouse Leukemia_Gery05_153genes	GeneSigDB	0.0007125	1	0.03157	0.311	13	122	RASL11B,CYB5R1,GADD45B,GADD45G,PER2,GLRX,DMC1,PPP1R15A,CLU,DNAJB2,CRYAB,DBP,MAFK
Coexpression	12216074-Table2	Human Bladder_Kassem02_20genes_RadioSensitiveVsResistant	GeneSigDB	0.0007304	1	0.03203	0.3154	5	20	NME1,HSF1,MAP2K5,RAD23A,TRAP1
Coexpression	12216074-Table3	Human Bladder_Kassem02_20genes_CellLine	GeneSigDB	0.0007304	1	0.03203	0.3154	5	20	NME1,HSF1,MAP2K5,RAD23A,TRAP1
Coexpression	19204204-SupplementaryTable5	Human Breast_Parker09_1918genes_IntrinsicGenes_Compilation	GeneSigDB	0.0007318	1	0.03203	0.3154	89	1681	RPL27A,B3GNT5,TCEAL4,ACTA1,ACOT4,F2R,AMZ2,S100A1,MFAP2,H2AC6,MFAP4,H2BC21,CXCL9,TRAPPC4,SORBS2,FMOD,CHCHD5,MRPS18B,SIAH2,AKR7A2,BEX3,SCUBE2,ZSCAN18,SMARCE1,IFI6,SNRPN,CYB5R1,MYBL1,GABRE,ATP5PO,GATM,UNC13D,CCND1,BCL2,NDP,SMOC2,DYRK4,NDUFB1,TSPAN9,YIF1A,PER2,AP3M2,MLLT11,EBNA1BP2,NME1,TBCA,CAPN3,CLIC6,OMD,TGFB2,CORO6,MAEL,TPD52L1,TPM1,MGAT4B,CENPA,TMC6,GABARAPL2,PPP1R15A,ZNF688,AP2S1,CLU,UCHL1,CLNS…
Coexpression	16151515-TableS4	Mouse StemCell_Forsberg05_606genes	GeneSigDB	0.000752	1	0.03278	0.3228	24	310	COPZ2,F2R,PRR16,FGD1,SORBS2,SIAH2,APOE,SNRPN,BGN,SOCS2,SULT1A1,GLRX,CAMK2B,TMED4,GTF2B,THY1,P2RX1,PDLIM1,ICA1,IRF6,TSC22D3,TSPAN32,S1PR1,EFNA1
Coexpression	15757864-Table2	Human Thyroid_Forberg05_35genes	GeneSigDB	0.0007745	1	0.03348	0.3298	6	30	H2BC21,SORBS2,CCND1,RBPMS,PDLIM1,CCN2
Coexpression	16007577-Table2	Human StemCell_Sun05_31genes	GeneSigDB	0.0007745	1	0.03348	0.3298	6	30	RRAS,MDK,TCEA2,IGFBP3,HTRA1,LTBP1
Coexpression	18425577-TableS3a	Human Breast_Creighton09_594genes	GeneSigDB	0.0007797	1	0.03357	0.3307	31	443	TCEAL4,SIAH2,SCUBE2,TMBIM4,NECAB3,TTC39A,CCND1,BCL2,MOAP1,SULT1A1,ABCC8,KIAA0556,CAMK2B,SLC16A5,TM7SF2,TNNT1,HMGCL,ZNF688,HSPA2,RAB26,MEAF6,GDF15,COX6C,PRKAB1,RAB11FIP3,TMEM30B,IVD,HSPB8,HSD17B8,TSC22D3,COQ4
Coexpression	18794137-SuppTable1d	Human Breast_Creighton08_453genes	GeneSigDB	0.0007958	1	0.03385	0.3334	23	293	LYPLAL1,TNIP1,SLC27A6,SIAH2,LYAR,TARS2,MT2A,SCUBE2,TTC39A,MYBL1,BCL2,KCNMB4,DOK7,PDLIM1,POLR1E,CHN1,BOD1,COX6C,IGSF1,RAB11FIP3,JAK2,HSPB8,SYTL5
Coexpression	19305503-TableS1	Rat Brain_Greco09_425genes	GeneSigDB	0.0008285	1	0.0351	0.3457	28	387	ACTA1,EXT1,APOE,MSRB2,CPLX1,NARS1,PROM1,TGFB2,PKIG,THY1,P2RX6,HBB,PCBD1,NXPH4,UBL7,TPM1,DDAH1,HSPA2,HSPB6,CSTB,CCN2,GADD45A,DDT,PTPRR,MAFK,RBM3,S1PR1,LUM
Coexpression	19286929-SuppTable1	Mouse Lung_Rangasamy09_2003genes	GeneSigDB	0.0008455	1	0.03568	0.3514	86	1621	CNKSR1,RIN3,ZRSR2,SYNPO2L,IMPACT,IER5,BFAR,ACTN2,F2R,CYS1,FGF1,ARRDC3,GPNMB,SLC25A5,PHLDA1,SGCG,MRPS18B,SHB,KLF15,SLU7,SIAH2,RAB20,PABPC1,ARHGAP1,NT5C2,SMARCE1,SNCA,ARRDC2,GADD45B,B4GALNT1,ARID5A,NCDN,TSPAN9,SOCS2,H2AW,PER3,GADD45G,PER2,SULT1A1,FASTK,FIBIN,SQSTM1,GLRX,ACOT2,ADGRL3,DDR1,NPR3,RBPMS,GRIA3,TTC9,TPM3,PDHB,SLC26A4,WIPF3,HMGB2,HMGCL,PPP1R15A,PFN1,CLU,UCP2,PEX16,HSPA2,GDF15,UBALD2,PRKAB1…
Coexpression	16203770-TableS1	Human Prostate_Best05_256genes	GeneSigDB	0.0008875	1	0.03677	0.3621	19	224	RPL27A,RPS6,RPS10,RPS18,AKR7A2,ATP5MG,TRAK2,GADD45B,GADD45G,ZPR1,TM7SF2,HGD,MRPL57,TOMM7,COX8A,ASPN,DBP,LRP3,LTBP2
Coexpression	17123152-Table3a	Human Breast_Feng07_58genesDownRegulated	GeneSigDB	0.0008885	1	0.03677	0.3621	8	54	GPNMB,RUNX2,TGFB3,ITGBL1,CTHRC1,HTRA1,ASPN,LUM
Coexpression	20003503-SuppTable1	Mouse Lung_Moulos09_925genes	GeneSigDB	0.0009162	1	0.03762	0.3705	42	668	USP11,TNIP1,AFMID,MGST3,FOXS1,YIPF4,LLPH,ARL2,DLK2,OGDHL,SMARCD3,TTC39A,KIF1A,NAP1L1,YIF1A,SQSTM1,ACOT2,NME1,TMED4,P2RX6,TNNT1,PCBP2,TPM3,DDX19B,MGAT4B,ENPP2,PACSIN3,AP2S1,CLU,GDF15,PNKD,CRYAB,TKFC,DAPK3,GATD1,EXOG,MPPE1,WIPI1,NUBP2,P3H2,LSP1,TMEM143
Coexpression	19061838-TableS4b	Human Viral_Cairo08_78genes	GeneSigDB	0.0009966	1	0.0403	0.3969	9	68	ACTN2,C1QTNF3,SIAH2,TBCA,TTC9,YPEL1,SMYD2,RHOBTB1,LEF1
Coexpression	16951191-Table3	Human Breast_Chen06_56genes	GeneSigDB	0.001006	1	0.04052	0.3991	8	55	PHLDA1,GADD45G,TGFB2,CLU,GDF15,IGFBP3,HTRA1,CXCR4
Coexpression	17295094-GeneList	Human Breast_VandenEynden07_269genes-hypoxia_angiogenesis	GeneSigDB	0.001064	1	0.04166	0.4103	21	263	RPS8,MDK,FGF1,CCND1,BCL2,TGFB2,TGFB3,THBS4,GYS1,TNNI3,HBB,PFKP,TUBA4A,UCP2,VEGFB,CSTB,CCN2,DAPK3,PLXDC1,SAE1,S1PR1
Coexpression	19325563-Table2a	Rat Heart_GallegoDelgado09_20genes_LateLVH	GeneSigDB	0.001095	1	0.04252	0.4188	4	13	ACTA1,FGF1,TRAK2,CCN2
Coexpression	15604209-Table2b	Human Uterine_Luo05_83genes_6Hr	GeneSigDB	0.001119	1	0.04314	0.4249	10	83	UQCRQ,CAMK2B,TEAD3,NUP188,PEX7,PFDN1,PFDN4,QPCT,HSF1,PTPRR
Coexpression	18435859-ShorterGeneList	Mouse Breast_Piechocki08_558genes	GeneSigDB	0.001136	1	0.04347	0.4281	27	376	ACTA1,MCAM,F2R,MFAP2,CXCL9,FGF1,SFRP4,CSPG5,FSCN1,ADAM19,SMOC2,BGN,GADD45G,CLIC6,THY1,TNNI3,ITGBL1,BMP8A,COL16A1,PPP2R2B,IGFBP3,ADAMTSL5,CCN2,MASP1,HTRA1,DES,S1PR1
Coexpression	18223198-TableS3	Human Brain_Chen-Plotkin08_747genes	GeneSigDB	0.001155	1	0.04404	0.4337	38	594	MAP2,ACTN2,AEBP1,GPNMB,AMPH,SCG5,PPFIA4,INPP5F,ZNF365,EFHD1,OGDHL,SNCA,NAP1L3,GATM,CCND1,MOAP1,NCDN,MLLT11,DDR1,CUX2,CAMK2B,GRIA3,OMD,THY1,TTC9,SEZ6L,CHN1,UCHL1,CRYM,LRRC49,PTPRR,AK5,KCNJ4,KLC1,LRRC1,RASSF4,LEF1,PLCE1
Coexpression	16397240-SuppTable3	Human Colon_Grade06_351genes	GeneSigDB	0.00117	1	0.04429	0.4362	21	265	MAP4,ACTA1,ETV4,MED12L,FGD1,ALDH3B1,PHLDA1,EFHD1,RASL11B,ALDH4A1,ARID5A,TPD52L1,TYRP1,SLC25A23,RAB26,DIO2,AQP10,SLITRK4,DVL3,TRAP1,LTBP2
Coexpression	18794102-TableS1	Human Breast_Yang08_840genes	GeneSigDB	0.001178	1	0.04444	0.4377	25	339	MAP4,F2R,MFAP4,C1QTNF3,FMOD,APOE,ATP5MG,ATP5ME,BGN,SOCS2,ABCC8,GLRB,DDR1,CLIC6,THBS4,SLC16A5,CLNS1A,CTHRC1,COL16A1,FEZ1,CCN2,JAK2,LSP1,LUM,PLCE1
Coexpression	17823238-TableS4a	Mouse EmbryonicStemCell_Soh07_224genes_A	GeneSigDB	0.001184	1	0.0445	0.4383	18	212	IL17D,MDK,CXCL9,ITGA10,APOE,GHITM,NDP,ESM1,TGFB2,TGFB3,LEFTY2,GDF6,VEGFB,GDF15,IGFBP3,CTF1,CCN2,ITGAE
Coexpression	20502458-TableS6b	Human Sarcoma_Missiaglia10_212genes	GeneSigDB	0.001203	1	0.04459	0.4391	14	145	MAP4,ACTA1,SYNPO2L,ACTN2,PPFIA4,NES,GATM,DOK7,PTPN21,TPM1,MYL6B,COL16A1,DES,TTLL7
Coexpression	15297395-SuppTable1	Human Lymphoma_Sriuranpong04_670genes_Epithelium(N)Metaplastic/DisplasticLesions(R)Carcinoma(T)	GeneSigDB	0.001242	1	0.04585	0.4516	31	456	RPS6,RPS8,EXT1,FAU,SIAH2,PABPC1,SMARCD3,MYL5,YIF1A,GADD45G,SQSTM1,EBNA1BP2,RBPMS,CAPN3,PYROXD2,PAFAH2,FAM177A1,SLC26A4,TERF2IP,UBB,HPS1,CCN2,TRNP1,CYP2J2,PSMB2,GALNT18,DIO2,KLC1,DVL3,STMN1,FARP1
Coexpression	16151515-TableS2	Mouse StemCell_Forsberg05_220genes	GeneSigDB	0.001254	1	0.04599	0.453	12	114	SIAH2,APOE,PACS1,SNRPN,BGN,SOCS2,SULT1A1,P2RX1,COL16A1,IRF6,TSC22D3,EFNA1
Coexpression	19658189-TableS9a	Human EmbryonicStemCell_Xu09_34genes	GeneSigDB	0.001312	1	0.04698	0.4627	6	33	SYNPO2L,ACTN2,SORBS2,CAMK2B,MYL7,MASP1
Coexpression	20035825-TableS2a	Mouse Lung_Mikkonen10_45genes	GeneSigDB	0.001312	1	0.04698	0.4627	6	33	SNCA,NPPA,FIBP,NXPH4,TMC6,TSC22D3
Coexpression	20460173-ImmPortTGF-betaFamilyMembers	Human Immune_Kong10_33genes_ImmPort_TGF-betaFamilyMembers	GeneSigDB	0.001312	1	0.04698	0.4627	6	33	TGFB2,TGFB3,LEFTY2,GDF6,BMP8A,GDF15
Coexpression	16849555-Fournier60GeneList	Human Breast_Fournier06_60genes_2D_versus_3D_cellCulture	GeneSigDB	0.001434	1	0.04698	0.4627	8	58	GPNMB,PHLDA1,MACROD1,APOE,ODC1,ZNF277,SERPINE2,CRYAB
Coexpression	11983058-Table1	Human Leukemia_Bo02_50genes_ALL/AMLClassSeparation	GeneSigDB	0.001575	1	0.04698	0.4627	7	46	S100A13,SQSTM1,MLLT11,CLU,MYL6B,CXCR4,STMN1
Coexpression	18590516-TableS1	Human Viral_Ciccaglione08_102genes	GeneSigDB	0.001609	1	0.04754	0.4682	10	87	MYL12A,CCND1,H2AW,DHRS3,CLU,GDF15,IGFBP3,ISG15,P3H2,LTBP1
Coexpression	17205517-Top100GoodPrognosisGenes	Human Breast_O'Brien07_Top100GoodPrognosisGenes	GeneSigDB	0.001609	1	0.04754	0.4682	10	87	SYNPO2L,C1QTNF3,AMPH,SCUBE2,NDP,SHISA2,CLIC6,TGFB3,HSPA2,ASPN
Coexpression	19235837-TableS2a	Human Pancreas_Cavard09_736genes	GeneSigDB	0.001614	1	0.04755	0.4684	35	544	USP11,SNAPC5,ETV4,IER5,MDK,ACYP2,S100A6,MGST3,PHLDA1,SLU7,MSRB2,OGDHL,RASL11B,NAP1L1,TBCA,HEY1,TPD52L1,DDAH2,ENPP2,GABARAPL2,PFDN4,CHN1,TERF2IP,CLIC1,QPCT,FADS2,IGFBP3,CSTB,GADD45A,CXCR4,MFN2,PCBP4,EDN3,MRPL46,PLCE1
Coexpression	16501597-Table2	Mouse Viral_Geserick06_8genes	GeneSigDB	0.001672	1	0.04885	0.4811	3	7	SIAH2,GADD45B,HEY1
Coexpression	11988840-Table1	Human Breast_Oh02_170genes	GeneSigDB	0.001699	1	0.04937	0.4863	13	134	F2R,AMPH,MT2A,SNRPN,GABRE,GADD45B,ODC1,COL16A1,COX6C,IGFBP3,CCN2,EFNA1,LTBP2
Coexpression	M10914	Genes down-regulated in prefrontal cortex (PFC) of mice carrying a hemizygotic microdeletion in the 22q11.2 region.	MSigDB C2: CGP Curated Gene Sets (v6.0)	1.063e-14	1.13e-10	5.651e-11	5.566e-10	60	517	IMPACT,MEA1,S100A6,MGST3,SCN2B,RPL22L1,SLC25A5,SCG5,SMIM29,UQCC2,MTLN,TRAPPC2L,ATP5ME,ATP5PO,TMEM42,NACA,NARS1,FAM120AOS,NDUFA2,NDUFA9,SMIM4,STAU1,H2AW,PPIL3,MLLT11,NME1,UQCR11,DMAC1,C19orf25,ELOB,TXNDC17,TM7SF2,PRAF2,COX14,TPD52L1,PDHB,UQCR10,MRPL57,AP2M1,CLNS1A,RAB26,C9orf16,COX5B,NDUFAF3,COX7A2,NDUFA11,MRPL40,ABHD11,SMYD2,TXNL4B,RAD23A,ATP5IF1,HIGD2A,SLITRK4,TTLL7,COQ4,SBDS,TANGO2,RPL5,SDHAF4
Coexpression	M2105	Genes whose expression was significantly and positively correlated with the number of perineuronal oligodendrocytes in the layer III of BA9 brain region.	MSigDB C2: CGP Curated Gene Sets (v6.0)	1.551e-12	1.65e-08	5.5e-09	5.417e-08	71	756	RPS3,USP11,TCEAL4,RPS8,RPS10,RPS12,RPS27A,S100A1,FAU,SLC25A6,ANP32B,SCG5,PPFIA4,ZNF365,SMARCD3,UQCRQ,LYRM9,ATP5PO,NARS1,NDUFB1,NCDN,RPL10A,SULT1A1,GLRB,AP3M2,MLLT11,TAF10,TCEA2,ELOB,CAMK2B,PKIG,THY1,ISCU,FIBP,COX7A2L,PRAF2,PDHB,ENPP2,PFDN1,GABARAPL2,PFKP,PFN1,TUBA4A,TUFM,UBB,AP2M1,AP2S1,UCHL1,MYL6B,CLNS1A,FADS2,DNAJB2,C9orf16,ANAPC13,COX5B,POLR2E,NDUFAF3,COX7A1,COX7A2,COX8A,CRYAB,CRYM,FEZ1,CSTB,M…
Coexpression	M2107	Genes whose expression significantly and positively correlated with oligodendrocyte density in layer VI of BA9 brain region in patients with bipolar disorder.	MSigDB C2: CGP Curated Gene Sets (v6.0)	5.59e-11	5.944e-07	1.486e-07	1.464e-06	63	681	TCEAL4,RPS6,RPS10,RPS12,RPS18,RPS27A,S100A1,FAU,MGST3,SLC25A6,SCG5,R3HDM2,SMARCD3,UQCRQ,LYRM9,ATP5PO,NACA,NARS1,NDUFB1,MOAP1,NCDN,RPL10A,SULT1A1,GLRB,AP3M2,MLLT11,TAF10,TCEA2,CAMK2B,PKIG,THY1,ISCU,FIBP,COX7A2L,PRAF2,PDHB,PFDN1,GABARAPL2,PFN1,TUBA4A,TUFM,UBB,SERPINE2,AP2S1,UCHL1,MYL6B,CLNS1A,HSPA2,POLR2E,NDUFAF3,COX6C,COX7A2,CLIP3,CRYM,FEZ1,MRPL40,HTRA1,DAD1,PSMD8,ITGAE,BMERB1,TRAP1,FARP1
Coexpression	M15112	Genes that comprise the mitochondria gene module	MSigDB C2: CGP Curated Gene Sets (v6.0)	1.936e-10	2.059e-06	3.432e-07	3.38e-06	31	217	GATD3A,SCO1,MRPS18B,ATP5MG,UQCRQ,ATP5ME,ATP5PO,BCL2,NDUFA4,NDUFA9,NDUFA10,NDUFB1,UQCR11,SLC16A5,FIBP,COX7A2L,PCCB,PDHB,UQCR10,TUFM,TOMM7,COX5B,COX6C,COX7A1,COX7A2,COX7B,COX8A,MRPL40,NT5M,DLD,TSFM
Coexpression	M18264	Genes involved in oxidative phosphorylation; based on literature and sequence annotation resources and converted to Affymetrix HG-U133A probe sets.	MSigDB C2: CGP Curated Gene Sets (v6.0)	4.637e-10	4.932e-06	7.046e-07	6.939e-06	19	87	ATP5MG,BEX3,UQCRQ,ATP5ME,ATP5PO,NDUFA2,NDUFA4,NDUFA9,NDUFA10,NDUFB1,UQCR11,COX7A2L,UQCR10,COX5B,COX6C,COX7A1,COX7A2,COX7B,COX8A
Coexpression	M2534	The '3/3 signature': genes consistently up-regulated in all three pools of normal mammary stem cells (defined by their ability to retain the dye PKH26).	MSigDB C2: CGP Curated Gene Sets (v6.0)	1.233e-09	1.312e-05	1.575e-06	1.551e-05	24	146	RPL27A,RPS3,RPS10,RPS12,RPS18,FAU,APOE,ATP5MG,MT2A,ATP5ME,NACA,NDP,RPL10A,UQCR11,TBCA,DDR1,TUBA4A,CLU,C9orf16,COX6C,COX7A2,NDUFA11,CSTB,DDT
Coexpression	M9433	Mitochondrial genes; based on literature and sequence annotation resources and converted to Affymetrix HG-U133A probe sets.	MSigDB C2: CGP Curated Gene Sets (v6.0)	2.131e-09	2.267e-05	2.267e-06	2.233e-05	44	429	SLC25A5,MRPS18B,AZIN1,ATP5MG,BEX3,ALDH4A1,ATP5ME,ATP5PO,GATM,BCL2,NDUFA2,NDUFA4,NDUFA9,NDUFA10,NDUFB1,UQCR11,ODC1,OXA1L,FIBP,COX7A2L,PCCB,PDHB,MKRN2,HMGCL,TUFM,MRPL57,UCP2,HPS1,GDF15,COX5B,COX6C,COX7A1,COX7A2,COX7B,COX8A,CYP11A1,IVD,TOMM22,MFN2,DLD,ATP5IF1,TSFM,TRAP1,MRPL46
Coexpression	M17728	Genes down-regulated in brain from patients with Alzheimer's disease.	MSigDB C2: CGP Curated Gene Sets (v6.0)	3.508e-09	3.73e-05	3.391e-06	3.34e-05	89	1237	SNAPC5,ACYP2,MGST3,SORBS2,SLC25A5,SLC25A6,SCG5,SEC31A,AZIN1,ATP5MG,BEX3,CSPG5,RNASET2,GHITM,UQCRQ,SNCA,ATP6V1G2,B4GALNT1,ATP5PO,TMEM126B,NARS1,NDUFA2,NDUFA4,NDUFA10,NDUFB1,MOAP1,LSM3,SOCS2,NSFL1C,GLRB,GLRX,MLLT11,NME1,UQCR11,ADGRL3,TBCA,GRIA3,ORC5,THY1,HEY1,ISCU,FIBP,COX7A2L,PRAF2,HBB,PCCB,SEZ6L,TPD52L1,PDHB,PENK,PEX7,PFDN1,PFDN4,CHN1,UQCR10,TERF2IP,TUFM,MRPL57,AP2M1,AP2S1,UCHL1,QPCT,C9orf16,ANAP…
Coexpression	M9577	Mitochondrial genes	MSigDB C2: CGP Curated Gene Sets (v6.0)	7.486e-09	7.962e-05	6.635e-06	6.535e-05	44	447	SLC25A5,MRPS18B,SHB,AZIN1,ATP5MG,BEX3,ALDH4A1,SNCA,ATP5ME,ATP5PO,GATM,BCL2,NDUFA2,NDUFA4,NDUFA10,NDUFB1,UQCR11,OXA1L,FIBP,PCCB,PDHB,MKRN2,HMGCL,TUFM,MRPL57,UCP2,HPS1,SLC25A23,COX5B,COX6C,COX7A1,COX7A2,COX7B,COX8A,ATP5MPL,CYP11A1,NT5M,IVD,TOMM22,MFN2,DLD,ATP5IF1,TSFM,MRPL46
Coexpression	M9788	Genes up-regulated in differentiating C2C12 cells (myoblasts) upon expression of PPARGC1A [GeneID=10891] off an adenoviral vector.	MSigDB C2: CGP Curated Gene Sets (v6.0)	1.041e-08	0.0001107	8.139e-06	8.016e-05	42	420	ACYP2,F2RL2,S100A1,S100A13,SLC25A5,PHLDA1,MRPS18B,AZIN1,FAM214B,ATP5MG,BEX3,MT2A,EFHD1,GHITM,ST6GALNAC4,TRAK2,MYL2,ATP5PO,FASTK,GLRX,GYS1,HBA1,TNNI3,PDHB,PFKP,UQCR10,TUFM,C9orf16,GDF15,COX5B,POLR2E,COX7A1,COX7A2,COX7B,COX8A,ATP5MPL,MRPL40,DDT,DLD,HSPB8,EDNRA,MRPL46
Coexpression	M11197	Housekeeping genes identified as expressed across 19 normal tissues.	MSigDB C2: CGP Curated Gene Sets (v6.0)	1.071e-08	0.0001139	8.139e-06	8.016e-05	40	389	RPL27A,RPS3,USP11,RPS6,RPS8,RPS10,RPS18,RPS27A,FMOD,SLC25A5,SLC25A6,ANP32B,PABPC1,ARHGAP1,MT2A,ATP5PO,NACA,NAP1L1,NDUFA4,RPL10A,SQSTM1,NPM1,RBPMS,PDLIM1,PCBP2,HMGN2,PFN1,UBB,CLU,CLIC1,COX6C,COX7A2,COX8A,CSTB,HTRA1,PSMB2,PSMD8,DDT,DVL3,STMN1
Coexpression	M12004	Genes down-regulated in U2OS cells (osteosarcoma) upon knockdown of both HDAC1 and HDAC2 [GeneID=3065;3066] by RNAi.	MSigDB C2: CGP Curated Gene Sets (v6.0)	1.507e-08	0.0001603	1.068e-05	0.0001052	29	231	RIN3,LINC01270,PRR16,H2AC6,MYL9,MGST3,H4C8,SCN2B,FGF1,GPNMB,ALDH3B1,C5orf46,SFTA1P,MYBL1,PRRT3,TGFB2,PDLIM1,TPM1,ITGBL1,CLU,FADS2,COL16A1,CRYAB,PPP2R2B,RHOBTB1,WIPI1,LRRC1,LUM,PLCE1
Coexpression	M2584	Genes down-regulated in the ventricles of healthy hearts, compared to atria.	MSigDB C2: CGP Curated Gene Sets (v6.0)	1.812e-08	0.0001927	1.204e-05	0.0001186	31	261	GATD3A,MAP4,ACTN2,H2BC21,SORBS2,MRPS18B,MYL12A,UQCRQ,CYB5R1,GABRE,MYL2,NDUFA9,GRM1,OXA1L,PDLIM1,GYS1,ISCU,TNNI3,TNNT1,TMC6,PFKP,CHN1,TUBA4A,COX7A2,COX8A,HSPB6,GADD45A,SMYD2,DIO2,DLD,TSFM
Coexpression	M6906	Genes down-regulated in U2OS cells (osteosarcoma) upon knockdown of HDAC2 [GeneID=3066] by RNAi.	MSigDB C2: CGP Curated Gene Sets (v6.0)	2.405e-08	0.0002558	1.504e-05	0.0001482	21	132	LINC01270,MYL9,GPNMB,ALDH3B1,SFTA1P,FOXS1,MYL2,CTXN1,TCEA2,SPX,PDLIM1,TPM1,CLU,LINC01405,FADS2,CRYAB,PPP2R2B,RHOBTB1,LSP1,LUM,PLCE1
Coexpression	M2099	Genes down-regulated in NB4 cells (acute promyelocytic leukemia, APL) in response to tretinoin [PubChem=444795]; based on Chip-seq data.	MSigDB C2: CGP Curated Gene Sets (v6.0)	3.813e-08	0.0004055	2.253e-05	0.0002219	65	841	RPS3,RPS6,RPS8,RPS10,RPS12,MIF4GD,RPS27A,RRAS,NPM3,H2AC6,H2BC21,AEBP1,H4C8,TRAPPC4,ARRDC3,CARNS1,SMIM19,SETD9,PABPC1,MYL12A,NECAB3,UQCRQ,MYL5,JAGN1,PSENEN,TMEM126B,FAM120AOS,SMIM4,RPL10A,GNB3,DMAC1,TRIM41,C19orf48,TXNDC17,SYNGR2,TM7SF2,SNAPIN,PDHB,HMGN2,CYTL1,TUFM,MRPL57,UBB,MYL6B,CLNS1A,RAB26,HOMER3,LETMD1,IFT22,NDUFAF3,NDUFA11,MRPL40,NEURL2,ZFAS1,DBP,HSD17B8,RABGGTB,RAD23A,HIGD2A,RBM3,STMN1,PPC…
Coexpression	M2605	Genes down-regulated in uveal melanoma: class 2 vs class 1 tumors.	MSigDB C2: CGP Curated Gene Sets (v6.0)	1.172e-07	0.001246	6.046e-05	0.0005955	46	525	RPS8,MCAM,BFAR,RPS27A,MFAP2,H2AC6,OARD1,SLC25A6,PHLDA1,MRPS18B,APOE,AKR7A2,ATP5MG,ARL2,ZSCAN18,SNCA,ZNF415,NAP1L1,CCND1,NMRK2,LSM3,RPL10A,NPM1,COX7A2L,HBB,ZBED1,PDHB,ENPP2,AP2M1,HSPA2,DNAJC4,LETMD1,CCDC28A,NDUFAF3,IL11RA,MASP1,DBP,SNHG32,RAB7A,SPAG16,HSD17B8,RABGGTB,PLAAT1,DVL3,LRRC1,RPL5
Coexpression	M1668	Up-regulated in the hypothalamus of aged (22 months) BALB/c mice, compared to young (2 months) controls	MSigDB C2: CGP Curated Gene Sets (v6.0)	1.194e-07	0.00127	6.046e-05	0.0005955	12	47	MAP4,RPS12,ANP32B,ATP5PO,TAF10,TBCA,THY1,HBA1,HBA2,COX7A2,COX7B,ATP5IF1
Coexpression	M13867	Genes up-regulated in HMLE cells (immortalized nontransformed mammary epithelium) after E-cadhedrin (CDH1) [GeneID=999] knockdown by RNAi.	MSigDB C2: CGP Curated Gene Sets (v6.0)	1.459e-07	0.001552	6.746e-05	0.0006644	29	256	PRR16,MFAP2,MYL9,SCG5,ITGA10,TRAK2,MYBL1,GADD45B,NAP1L3,BGN,GLRB,GLRX,TCEA2,THY1,PRAF2,TPM1,DDAH1,ENPP2,CHN1,ITGBL1,PRMT2,IGFBP3,CCN2,C14orf132,RHOBTB1,WIPI1,TSC22D3,LTBP1,LTBP2
Coexpression	M13713	Genes co-regulated in uterus during a time course response to progesterone [PubChem=5994]: SOM cluster 13.	MSigDB C2: CGP Curated Gene Sets (v6.0)	5.878e-07	0.006252	0.0002059	0.002028	22	172	ACYP2,S100A6,PSMG4,B9D1,ATP5PO,C9orf78,CCND1,NDUFA2,NDUFA9,LSM3,UQCR11,TXNDC17,FIBP,PCCB,PEX7,UQCR10,TSEN34,ANAPC13,COX5B,COX7B,ATP5MPL,RBM3
Coexpression	M3654	Genes up-regulated in samples with systolic heart failure compared to normal hearts.	MSigDB C2: CGP Curated Gene Sets (v6.0)	7.56e-07	0.00804	0.0002436	0.0024	38	422	MFAP4,FGF1,SFRP4,FMOD,PHLDA1,VIPAS39,RASL11B,ALDH4A1,GADD45B,P2RY13,ADA2,SOCS2,NPPA,DEPP1,GRIA3,OMD,ATP1B4,MTURN,DDAH1,ENPP2,PIK3IP1,ITGBL1,SERPINE2,UCHL1,CTHRC1,PRMT2,IGFBP3,ARHGAP24,ASPN,JMJD4,MAP3K7CL,GADD45A,JAK2,CXCR4,MFN2,CLEC2B,ACE2,LTBP2
Coexpression	M12522	The 'group 1 set' of genes associated with acquired endocrine therapy resistance in breast tumors expressing ESR1 and ERBB2 [GeneID=2099;2064].	MSigDB C2: CGP Curated Gene Sets (v6.0)	2.015e-06	0.02143	0.000559	0.005505	43	527	MAP4,TCEAL4,RPS12,RPL22L1,SLC27A6,ANP32B,SIAH2,MSRB2,ARL2,SCUBE2,EFHD1,MYBL1,DTD1,ATP5PO,BCL2,FAM120AOS,COMMD6,SOCS2,RBPMS,DOK7,VXN,PYROXD2,C19orf48,TNNT1,TPD52L1,TPM3,HMGB2,PRMT2,HOMER3,MDFIC,TKFC,FEZ1,IGSF1,ARHGAP24,PHF19,C19orf54,SNHG32,RHNO1,BMERB1,SYTL5,LTBP1,IRX2,SMIM30
Coexpression	M4950	Genes up-regulated in liver tumor compared to the normal adjacent tissue.	MSigDB C2: CGP Curated Gene Sets (v6.0)	2.05e-06	0.0218	0.000559	0.005505	61	863	LYPLAL1,USP11,MIF4GD,BFAR,RPS27A,MEA1,AMZ2,H2AC6,H2BC21,MGST3,CXCL9,GTF2IRD2,TRAPPC4,C12orf45,BORCS7,MRPS18B,KLF15,LLPH,LYAR,TARS2,ZSCAN18,FRS3,FAM120AOS,C12orf57,LSM3,RPL10A,KIAA0556,GNG5,ODC1,TMED4,C1orf198,OXA1L,THY1,HEY1,SH3D19,DDAH2,VPS45,MKRN2,HMGB2,GABARAPL2,PFN1,UBB,SDF2L1,PYCR2,COX7A2,CSTB,MRPL40,PSMB2,DAD1,IRF6,GALNT18,TMCO3,HSD17B8,WIPI1,DVL3,BOLA1,KIAA1191,KLHDC9,S1PR1,APIP,ACE2
Coexpression	M10839	Down-regulated genes in MDA-MB-435 cells (breast cancer) undergoing G2/M arrest after treatment with 2-methoxyestradiol (2ME2) [PubChem=1573].	MSigDB C2: CGP Curated Gene Sets (v6.0)	5.934e-06	0.06311	0.001468	0.01446	17	127	SNAPC5,MACROD1,SCUBE2,OGDHL,MYL5,SMOC2,RPL10A,PER2,CLIC6,ZNF277,TYRP1,LENG1,ARHGAP24,NEURL2,C1orf54,RBM3,BOLA1
Coexpression	M2571	Genes down-regulated during prostate cancer progression in the JOCK1 model due to inducible activation of FGFR1 [GeneID=2260] gene in prostate.	MSigDB C2: CGP Curated Gene Sets (v6.0)	6.447e-06	0.06857	0.001541	0.01518	29	308	COPZ2,ACTA1,MYL9,H4C8,FMOD,PLEKHA4,MT2A,SCUBE2,SMARCD3,SNRPN,PROM1,GLRB,ACOT2,TGFB2,P2RX1,P2RX6,TNNT1,TPM1,ENPP2,RAB26,HSPB6,PHF19,DES,CREG2,PCBP4,WIPI1,SLC16A9,TSC22D3,ST8SIA2
Coexpression	M2369	Genes down-regulated during differentiation of Oli-Neu cells (oligodendroglial precursor) in response to PD174265 [PubChem=4709].	MSigDB C2: CGP Curated Gene Sets (v6.0)	7.529e-06	0.08007	0.001601	0.01577	70	1080	MBP,MIF4GD,IER5,BFAR,ATAT1,S100A1,H2BC21,AEBP1,ARRDC3,C12orf45,ALDH3B1,YIPF4,DLGAP4,SHB,ZNF365,FAM214B,VIPAS39,EFHD1,DLK2,BRSK1,KIF13A,GADD45B,ATP6V1G2,GATM,FAM120AOS,H2AW,PER3,GLRB,MLLT11,ADGRL3,DDR1,TRIM41,TGFB3,PKIG,HEY1,SH3D19,SNAPIN,SDSL,ENPP2,TP53INP2,PIK3IP1,SEMA5B,UCP2,QPCT,C11orf1,COL9A1,IFT22,COL16A1,CCDC28A,NDUFAF3,CRYAB,CLIP3,PPP2R2B,FBXO44,TJAP1,HACL1,HTRA1,CYP2J2,LRRC49,DBP,JAK2,LYP…
Coexpression	M15774	Genes whose promoters are bound by MYC [GeneID=4609], according to MYC Target Gene Database.	MSigDB C2: CGP Curated Gene Sets (v6.0)	7.921e-06	0.08424	0.001652	0.01627	71	1102	RPL27A,USP11,RPS6,IER5,RPS27A,RRAS,ACYP2,H2AC6,H2BC21,SCO1,AZIN1,AKR7A2,MT2A,RNASET2,MPC1,ST6GALNAC4,TRAK2,EIF3I,ATP6V1G2,ATP5PO,NACA,NAP1L1,NDUFA2,DPM1,YIF1A,SUPT5H,SQSTM1,ZPR1,NME1,NPM1,ODC1,TGFB2,TGFB3,THBS4,SYNGR2,COX7A2L,HBA1,HBA2,HBB,SLC26A4,HMGN2,PFN1,UQCR10,PLA2G15,SERPINE2,UCHL1,CLNS1A,PEX16,TSEN34,SDF2L1,PYCR2,ZFPL1,PRKAB1,CSTB,MRPL40,MAP2K5,IL11RA,DCAF8,PSMD8,DBP,TOMM22,TSC22D3,RBM3,SA…
Coexpression	M1678	Strongly up-regulated at 96 h during differentiation of 3T3-L1 cells (fibroblast) into adipocytes.	MSigDB C2: CGP Curated Gene Sets (v6.0)	1.009e-05	0.1073	0.00195	0.01921	21	189	MCAM,ACYP2,S100A1,SLC25A5,APOE,UQCRQ,ATP5PO,NDUFA9,CA3,RBPMS,PDHB,UQCR10,TP53INP2,TUFM,C9orf16,COX5B,COX7A2,COX7B,DDT,DLD,LUM
Coexpression	M7732	Genes in this set correspond to the most abuntant transcripts that are also specific to platelets.	MSigDB C2: CGP Curated Gene Sets (v6.0)	1.095e-05	0.1165	0.002036	0.02005	12	70	H2AC6,H2BC21,BEX3,SNCA,NAP1L1,ODC1,PDLIM1,HBB,TPM1,TUBA4A,MAP3K7CL,TMEM140
Coexpression	M11350	Genes with GO annotation and down-regulated after DNA damage in cell lines from young donors.	MSigDB C2: CGP Curated Gene Sets (v6.0)	1.631e-05	0.1734	0.002815	0.02773	21	195	BEX3,ATP5ME,CCND1,GLRX,TAF10,TBCA,TGFB3,TPM1,SERPINE2,SNX8,CRYAB,PPP2R2B,IGFBP3,PRKAB1,PRKACA,CCN2,IL11RA,GADD45A,RAB7A,HSPB8,RABGGTB
Coexpression	M1610	All significantly up-regulated genes in kidney glomeruli isolated from TCF21 [Gene ID=6943] knockout mice.	MSigDB C2: CGP Curated Gene Sets (v6.0)	1.695e-05	0.1803	0.002862	0.02819	35	428	DCAKD,MNS1,MDK,MFAP2,FMOD,MACROD1,AKR7A2,BANF1,LSM3,SOCS2,GLRB,OSCP1,NME1,C19orf25,GRIA3,TGFB3,CENPA,PENK,YPEL1,CLU,CTHRC1,TRAPPC6A,ABHD11,TRPM4,SNHG32,MIR99AHG,TMEM231,PCBP4,KIF22,STMN1,EDNRA,ACE2,LSP1,MRTO4,LUM
Coexpression	M13796	Genes up-regulated in a mouse model of heart disease whose expression reverted to normal by silencing of MIR21 [GeneID=406991] microRNA.	MSigDB C2: CGP Curated Gene Sets (v6.0)	2.456e-05	0.2612	0.003731	0.03674	6	17	NMRK2,BGN,TGFB3,ASPN,LTBP2,LUM
Coexpression	M12300	Up-regulated genesin the left ventricle myocardium of patients with heart failure following implantation of LVAD (left ventricular assist device).	MSigDB C2: CGP Curated Gene Sets (v6.0)	3.254e-05	0.3461	0.004807	0.04734	14	103	ACTA1,SYNPO2L,IER5,MFAP4,RND3,MT2A,GADD45B,NES,GADD45G,DEPP1,DDAH1,CLU,CCN2,TSC22D3
Coexpression	M12225	Up-regulated genes in angioimmunoblastic lymphoma (AILT) compared to normal T lymphocytes.	MSigDB C2: CGP Curated Gene Sets (v6.0)	3.461e-05	0.368	0.004973	0.04898	21	205	RRAS,MFAP4,MYL9,CXCL9,GPNMB,APOE,RND3,P2RY13,SMOC2,RBPMS,DEPP1,THY1,TPM1,ENPP2,CLU,CTHRC1,COX7A1,TMEM163,HSPB8,LUM,RASSF4
Coexpression	M11763	Genes commonly up-regulated in SK-N-BE cells (neuroblastoma) after RNAi knockdown of CCND1 and CDK4 [GeneID=595;1019].	MSigDB C2: CGP Curated Gene Sets (v6.0)	3.857e-05	0.4102	0.005366	0.05285	11	67	TIGD1,H2BC21,H4C8,SCG5,LINC00847,LIN7B,LNP1,TM7SF2,ENPP2,ZNF610,PPCS
Coexpression	M11584	Down-regulated genes whose expression is associated with amplification of the 8q24 chromosome region in pancreatic cancer cell lines.	MSigDB C2: CGP Curated Gene Sets (v6.0)	4.666e-05	0.4963	0.006234	0.0614	9	46	MDK,MYL12A,TMEM242,NT5C2,COMMD6,PYROXD2,HPS1,KLC1,LPP-AS2
Coexpression	M4120	Genes up-regulated in HeLa cells (cervical cancer) after simultaneus knockdown of all three MBD (methyl-CpG binding domain) proteins MeCP2, MBD1 and MBD2 [GeneID=4204;4152;8932] by RNAi.	MSigDB C2: CGP Curated Gene Sets (v6.0)	4.748e-05	0.5049	0.006234	0.0614	61	957	CNKSR1,ACTA1,RPS8,ACTN2,MEA1,ALDH3B1,DNPH1,PACS1,BEX3,ARL2,MT2A,GHITM,NECAB3,SMARCD3,EIF3I,IFI6,GADD45B,NAP1L1,COMMD6,RPL10A,FASTK,SUPT5H,GLRX,NKG7,EBNA1BP2,UQCR11,TBCA,TXNDC17,TGFB2,OXA1L,TM7SF2,PCBP2,TPM3,HMGN2,CYTL1,PFN1,PLA2G15,TUBA4A,MEAF6,DNAJC4,TOMM7,COX8A,XPA,TKFC,CHD5,MAP2K5,PHF19,PSMD8,BRINP1,DDT,DNAAF5,DLD,CLEC2B,STMN1,TSPAN32,NKIRAS2,NUBP2,TRAP1,COQ4,LINC00484,MRTO4
Coexpression	M13206	Genes down-regulated in TC71 and EWS502 cells (Ewing's sarcoma) by EWSR1-FLI1 [GeneID=2130;2314] as inferred from RNAi knockdown of this fusion protein.	MSigDB C2: CGP Curated Gene Sets (v6.0)	4.918e-05	0.523	0.006301	0.06206	28	326	MAP2,H2AC6,H2BC21,GPNMB,KLHDC8B,PHLDA1,FAM214B,MSRB2,DACT3,DOK5,MYL5,H2AW,KCNMB4,SHISA2,TGFB2,MTURN,DDAH1,ENPP2,TP53INP2,CLIP3,ISG15,MAP2K5,IL11RA,GAB2,RHOBTB1,CLEC2B,C1orf54,EFNA1
Coexpression	M1712	Genes enriched in neurons in the adult mouse brain identified through correlation-based searches seeded with neuron cell-type specific gene expression patterns.	MSigDB C2: CGP Curated Gene Sets (v6.0)	5.111e-05	0.5435	0.006471	0.06373	11	69	SNRPN,UNC80,ATP6V1G2,CPLX1,CAMK2B,GRIA3,CHN1,TUBA4A,UCHL1,PRKACA,BMERB1
Coexpression	M5042	Up-regulated genes in the canonical gene expression signature of the fibroblast core serum response (CSR) defined by the Stanford group.	MSigDB C2: CGP Curated Gene Sets (v6.0)	5.669e-05	0.6029	0.007093	0.06986	21	212	MRPL37,SKA2,SLC25A5,GLRX3,LYAR,MYBL1,LSM3,EBNA1BP2,NME1,C19orf48,TPM1,TPM3,HMGN2,PFKP,PFN1,UQCR10,TUBA4A,NRIP3,PHF19,SPRYD7,MRTO4
Coexpression	M5547	Age up-regulated genes in the human frontal cortex.	MSigDB C2: CGP Curated Gene Sets (v6.0)	6.117e-05	0.6506	0.007178	0.0707	24	262	H2AC6,FGF1,ANP32B,MYL12A,MT2A,EFHD1,NT5C2,ALDH4A1,GATM,BCL2,DDR1,TNNT1,HBB,DHRS3,HSPA2,VEGFB,CRYAB,HTRA1,GAB2,KLC1,CLEC2B,WIPI1,S1PR1,LTBP1
Coexpression	M1784	Genes changed in U373-MG cells (malignant glioma) upon treatment with arsenic trioxide [PubChem=14888], a chemical that can cause autophagic cell death.	MSigDB C2: CGP Curated Gene Sets (v6.0)	6.256e-05	0.6653	0.007178	0.0707	15	123	GPNMB,PHLDA1,MT2A,MYBL1,NES,NDP,SOCS2,GLRX,HEY1,PPP1R15A,GDF15,CRYAB,CLEC2B,WIPI1,TSC22D3
Coexpression	M2324	Genes up-regulated in uterus upon knockout of BMP2 [GeneID=650].	MSigDB C2: CGP Curated Gene Sets (v6.0)	6.5e-05	0.6912	0.007178	0.0707	50	745	RRAS,S100A1,MFAP2,MFAP4,AEBP1,SFRP4,SMIM29,APOE,RAB20,MSRB2,C12orf57,PROM1,H2AW,ADHFE1,PER3,SULT1A1,CTXN1,DDR1,RBPMS,MTURN,TNNT1,PCBD1,DDAH2,ENPP2,PIK3IP1,C16orf89,CLU,QPCT,SLC25A23,NUDT7,FAAP20,CLIP3,TMEM30B,TRPM4,HTRA1,RIPOR2,DCAF8,IRF6,DBP,JAK2,C14orf132,RHOBTB1,PTPRR,DIO2,CRISPLD1,WIPI1,RENBP,EDNRA,LTBP1,TMEM140
Coexpression	M8510	Top down-regulated marker genes for medulloblastoma classification: desmoplastic vs classic morphology.	MSigDB C2: CGP Curated Gene Sets (v6.0)	6.519e-05	0.6933	0.007178	0.0707	10	59	RPS10,RPS18,SCG5,RND3,BCL2,NDP,RPL10A,UCHL1,CXCR4,LTBP2
Coexpression	M1671	Genes up-regulated in response to hydrogen peroxide [PubChem=784] in CS-B cells (Cockayne syndrome fibroblast, CS) expressing ERCC6 [GeneID=2074] off a plasmid vector.	MSigDB C2: CGP Curated Gene Sets (v6.0)	6.7e-05	0.7126	0.007178	0.0707	11	71	MCAM,AEBP1,IFI6,COMMD6,TUBA4A,GDF15,COX6C,CRYAB,GADD45A,TPT1-AS1,RPL5
Coexpression	M3854	Genes down-regulated in mice with skin specific double knockout of both RB1 and TP53 [GeneID=5925;7157] by Cre-lox.	MSigDB C2: CGP Curated Gene Sets (v6.0)	7.1e-05	0.7551	0.007178	0.0707	42	591	MAP4,RPS8,MBP,MIF4GD,IMPACT,RPS18,YIPF4,APOE,LYAR,DNPH1,MT2A,RASL11B,SNCA,CCND1,NDUFA2,NCDN,RAB12,DDR1,CAMK2B,SHISA2,PKIG,GTF2B,TNNT1,CENPA,PPCDC,YPEL1,TUFM,CLU,UCP2,CLNS1A,ARL16,FAAP20,CRYM,MASP1,CERS4,ATP5IF1,ZDHHC14,BMERB1,EDN3,LTBP1,LTBP2,SDHAF4
Coexpression	M8673	Genes down-regulated in mice with skin specific knockout of TP53 [GeneID=7157].	MSigDB C2: CGP Curated Gene Sets (v6.0)	7.655e-05	0.8141	0.007268	0.07159	42	593	MAP4,RPS8,MBP,MIF4GD,IMPACT,RPS18,YIPF4,APOE,LYAR,DNPH1,MT2A,RASL11B,SNCA,CCND1,NDUFA2,NCDN,RAB12,DDR1,CAMK2B,SHISA2,PKIG,GTF2B,TNNT1,CENPA,PPCDC,YPEL1,TUBA4A,TUFM,CLU,UCP2,CLNS1A,ARL16,FAAP20,CRYM,MASP1,CERS4,ATP5IF1,ZDHHC14,BMERB1,EDN3,LTBP2,SDHAF4
Coexpression	M73	Genes up-regulated in primary tissue culture of epidermal kerationcytes after UVB irradiation.	MSigDB C2: CGP Curated Gene Sets (v6.0)	9.067e-05	0.9642	0.008458	0.08331	12	86	RPL27A,NAP1L1,NDUFA4,RPL10A,TAF10,ISCU,UBB,COX5B,COX6C,COX7A2,COX7B,COX8A
Coexpression	M16123	Muscle development genes up-regulated in Rh4 cells (alveolar rhabdomyosarcoma, ARMS) but not in the RD cells (embryonal rhabdomyosarcoma, ERMS) after knockdown of PAX3-FOXO1 [GeneID=5077;2308] fusion by RNAi for 72 hr.	MSigDB C2: CGP Curated Gene Sets (v6.0)	9.272e-05	0.9861	0.008575	0.08445	9	50	AEBP1,SGCG,BORCS8,SYNGR2,TPM1,MYL6B,CRYAB,CTF1,DES
Coexpression	M2007	Genes with low-CpG-density promoters (LCP) bearing histone H3 trimethylation mark at K4 (H3K4me3) in embryonic stem cells (ES).	MSigDB C2: CGP Curated Gene Sets (v6.0)	9.432e-05	1	0.008647	0.08517	16	142	SCN2B,FGF1,ALDH3B1,UNC13D,GLRX,DDR1,SLC16A5,P2RX6,CYSRT1,GPR173,COX7A1,CYP2J2,DAPK3,C1orf54,TSPAN32,HSD17B14
Coexpression	M6386	The 'group 4 set' of genes associated with acquired endocrine therapy resistance in breast tumors expressing ESR1 but not ERBB2 [GeneID=2099;2064].	MSigDB C2: CGP Curated Gene Sets (v6.0)	0.000102	1	0.009275	0.09135	26	305	GATD3A,LYPLAL1,TNIP1,SLC27A6,SIAH2,LYAR,TARS2,MT2A,SCUBE2,TTC39A,SNRPN,MYBL1,BCL2,KCNMB4,DOK7,PDLIM1,POLR1E,CIART,CHN1,BOD1,COX6C,IGSF1,RAB11FIP3,JAK2,HSPB8,SYTL5
Coexpression	M19432	Genes up-regulated during pubertal mammary gland development between week 4 and 5.	MSigDB C2: CGP Curated Gene Sets (v6.0)	0.0001037	1	0.00935	0.09209	24	271	RPS10,MDK,F2R,RND3,BEX3,PROM1,DDR1,NPR3,TGFB3,HEY1,PLEKHB1,TUBA4A,COL9A1,COL16A1,FAAP20,IRX1,TMEM30B,HTRA1,RIPOR2,IRF6,KIF22,ATP5IF1,IRX2,RPL5
Coexpression	M1975	Table 2S. Genes in MEF, MCV6, MCV8.1 and ES cells by epigenetic mark of their promoter	MSigDB C2: CGP Curated Gene Sets (v6.0)	0.0001082	1	0.009593	0.09449	18	174	TNIP1,SCN2B,FGF1,ALDH3B1,UNC13D,GLRX,P2RX6,NANOS3,CYSRT1,GPR173,COX7A1,CYP2J2,DAPK3,C1orf54,TSPAN32,TANGO2,HSD17B14,GPA33
Coexpression	M2116	Genes correlated with neural type of glioblastoma multiforme tumors.	MSigDB C2: CGP Curated Gene Sets (v6.0)	0.0001082	1	0.009593	0.09449	15	129	MBP,ACYP2,MGST3,ATP5MG,MSRB2,LYRM9,GRM1,TPM3,ENPP2,GABARAPL2,CHN1,COX5B,CRYM,S1PR1,RERGL
Coexpression	M4960	Genes down-regulated in basal subtype of breast cancer samles.	MSigDB C2: CGP Curated Gene Sets (v6.0)	0.0001095	1	0.009624	0.09479	47	701	TCEAL4,MFAP4,FCER1A,C1QTNF3,SFRP4,BCAS4,SCUBE2,ZSCAN18,B9D1,ALDH4A1,TTC39A,BBS4,RGS11,CCND1,BCL2,SOCS2,ABCC8,GLRB,CAMK2B,OMD,THBS4,TM7SF2,TTC9,TNNT1,PCBP2,HGD,ITGBL1,UCP2,HSPA2,RAB26,PPDPF,GDF15,ICA1,TKFC,PPIP5K1,TMEM30B,ASPN,IVD,C14orf132,AK5,SPAG16,HSPB8,CERS4,CLBA1,BMERB1,COQ4,TMEM143
Coexpression	M2096	Genes down-regulated in the RCC4 cells (renal cell carcinoma, RCC) expressing VHL [GeneID=7428] mutants Type 1 and 2B (associated with RCC) but not those of Type 2A and 2C (not associated with RCC).	MSigDB C2: CGP Curated Gene Sets (v6.0)	0.0001139	1	0.009928	0.09778	5	14	ALDH3B1,SEC31A,SNRPN,RHOBTB1,MPPE1
Coexpression	M1626	Cluster 1: genes progressively down-regulated over 24 h (peak at 0 h timepoint) during differentiation of 3T3-L1 fibroblasts into adipocytes in response to adipogenic hormones.	MSigDB C2: CGP Curated Gene Sets (v6.0)	0.0001157	1	0.01001	0.09857	10	63	MAP4,MYL9,RASL11B,CYB5R1,TGFB3,PCCB,TPM1,CRYAB,ISG15,GADD45A
Coexpression	M11171	Genes up-regulated in fibroblasts expressing mutant forms of ERCC3 [GeneID=2071] after UV irradiation.	MSigDB C2: CGP Curated Gene Sets (v6.0)	0.000126	1	0.01081	0.1064	26	309	GATD3A,MDK,MEA1,S100A13,SMARCD3,EIF3I,CYB5R1,MOAP1,NCDN,PER2,SULT1A1,SQSTM1,AP3M2,MLLT11,TM7SF2,TUBA4A,AP2S1,HSPA2,ZFPL1,ISG15,IL11RA,PSMD8,KCNJ4,RAD9A,EFNA1,SMIM10L1
Coexpression	M2572	Invasiveness signature resulting from cancer cell/microenvironment interaction.	MSigDB C2: CGP Curated Gene Sets (v6.0)	0.0001326	1	0.01128	0.1111	10	64	COPZ2,AEBP1,C1QTNF3,SFRP4,BGN,THY1,ITGBL1,ASPN,EDNRA,LUM
Coexpression	M1914	Genes up-regulated in neural stem cells (NSC) at 60 h after cre-lox knockout of TLX (NR2E1) [GeneID=7101].	MSigDB C2: CGP Curated Gene Sets (v6.0)	0.0001357	1	0.01145	0.1128	25	293	MCAM,S100A13,MGST3,FGF1,APOE,EFHD1,GHITM,CYB5R1,GADD45B,KIF1A,H2AW,PER3,GADD45G,TGFB3,SEZ6L,PFKP,TP53INP2,CLU,PRMT2,CRYAB,CSTB,CYP2J2,TMCO3,WIPI1,TANGO2
Coexpression	M5792	Genes with increased copy number that correlates with increased expression across six different lung adenocarcinoma cell lines.	MSigDB C2: CGP Curated Gene Sets (v6.0)	0.0001446	1	0.01199	0.1181	18	178	RPL27A,RPS10,MDK,PABPC1,FSCN1,NACA,BGN,RPL10A,YIF1A,NME1,ODC1,SYNGR2,PFKP,TUFM,UCHL1,IGFBP3,CSTB,PSMD8
Coexpression	M19529	Genes down-regulated in anaplastic thyroid carcinoma (ATC) compared to normal thyroid tissue.	MSigDB C2: CGP Curated Gene Sets (v6.0)	0.0001449	1	0.01199	0.1181	38	533	MCAM,IL17D,SMIM19,BORCS7,FMOD,MSRB2,RNASET2,ZSCAN18,B9D1,MPC1,CYB5R1,DOK5,BCL2,SULT1A1,RBPMS,GPR27,ZBTB47,TMED4,HEY1,MTURN,ZBED1,PCBP2,SLC26A4,KANSL1-AS1,SDF2L1,C11orf71,SLC25A23,CCDC28A,COX7B,PNKD,FEZ1,ARHGAP24,DCAF8,GALNT18,IVD,DIO2,ATP5IF1,FARP1
Coexpression	M1834	Genes up-regulated in freshly isolated CD31- [GeneID=5175] (stromal stem cells from adipose tissue) versus the CD31+ (non-stem) counterparts.	MSigDB C2: CGP Curated Gene Sets (v6.0)	0.0001458	1	0.01199	0.1181	23	260	MBP,PRR16,MFAP2,MFAP4,AEBP1,GPNMB,SFRP4,FMOD,APOE,GRIA3,OMD,TGFB2,ITGBL1,SERPINE2,COL16A1,CRYAB,IGFBP3,FEZ1,HTRA1,HSPB8,RERGL,LTBP2,LUM
Coexpression	M5686	Genes down-regulated in MEF cells (embryonic fibroblasts) isolated from RB1 [GeneID=5925] knockout mice: chronic loss of function (LOF) of RB1.	MSigDB C2: CGP Curated Gene Sets (v6.0)	0.0001465	1	0.01199	0.1181	14	118	ACTA1,APOE,RASL11B,SQSTM1,MLLT11,CA3,NPR3,TGFB2,TPD52L1,UCHL1,IGFBP3,HTRA1,ZDHHC14,RENBP
Coexpression	M2395	Genes up-regulated in pancreatic islets upon knockout of HNF1A [GeneID=6927].	MSigDB C2: CGP Curated Gene Sets (v6.0)	0.0001507	1	0.01224	0.1205	17	163	MAP4,MCAM,AEBP1,APOE,SNCA,CPLX1,BGN,NOL3,TGFB2,TGFB3,THY1,DUSP26,SERPINE2,UCHL1,HPS1,HTRA1,PCDH15
Coexpression	M1920	Genes forming the macrophage-enriched metabolic network (MEMN) claimed to have a causal relationship with the metabolic syndrom traits.	MSigDB C2: CGP Curated Gene Sets (v6.0)	0.0001532	1	0.01234	0.1215	71	1210	MAP4,PI4K2A,IER5,TNIP1,BFAR,S100A6,MFAP2,GPNMB,ALDH3B1,FOXS1,FMOD,SLC27A6,P3H3,PLEKHA4,CHCHD6,AZIN1,BEX3,VIPAS39,FRZB,ST6GALNAC4,FSCN1,GADD45B,ADAM19,LAYN,NAP1L1,GATM,P2RY13,UNC13D,SMOC2,BGN,GLRX,GNB3,SPACA9,TGFB3,HEY1,SYNGR2,HAAO,PRAF2,TPM3,DDAH2,CENPA,PACSIN3,PFKP,PIK3IP1,ITGBL1,AP2M1,CLIC1,SDF2L1,PRMT2,SLC25A23,HOMER3,ANAPC13,COL16A1,ICA1,CSTB,IL11RA,HTRA1,NEURL2,PSMD8,DDT,CLBA1,KIF22,PLD4,C1o…
Coexpression	M17753	Set 'Myc targets2': targets of c-Myc [GeneID=4609] and Max [GeneID=4149] identified by ChIP on chip in a Burkitt's lymphoma cell line; overlap set.	MSigDB C2: CGP Curated Gene Sets (v6.0)	0.0001701	1	0.01345	0.1324	50	775	RPL27A,USP11,RPS6,IER5,RPS27A,RRAS,H2AC6,H2BC21,SCO1,AZIN1,AKR7A2,MT2A,RNASET2,MPC1,ST6GALNAC4,EIF3I,NACA,NDUFA2,NDUFB1,DPM1,YIF1A,SUPT5H,SQSTM1,ZPR1,NME1,COX7A2L,SLC26A4,PFN1,UQCR10,PLA2G15,UCHL1,PEX16,TSEN34,SDF2L1,PYCR2,HSPA2,ZFPL1,PRKAB1,MRPL40,MAP2K5,DCAF8,PSMD8,DBP,RAD9A,SAE1,NUBP2,TRAP1,LSP1,MRTO4,RPL5
Coexpression	M19391	Genes down-regulated in prostate cancer samples.	MSigDB C2: CGP Curated Gene Sets (v6.0)	0.0001707	1	0.01345	0.1324	35	480	MCAM,SAMD12,S100A6,CYS1,MYL9,AEBP1,PHLDA1,P3H3,SCUBE2,GABRE,LAYN,GATM,MIR100HG,BCL2,PER3,RBPMS,ZBTB47,CLIC6,TGFB2,TGFB3,PDLIM1,UBE2QL1,TPM1,PENK,CHN1,TUBA4A,CLU,COL9A1,COL16A1,CRYAB,FEZ1,MASP1,HSPB8,TSC22D3,LTBP1
Coexpression	M17123	Genes specifically expressed in samples from patients with pediatric acute myeloid leukemia (AML) bearing 11q23 rearrangements.	MSigDB C2: CGP Curated Gene Sets (v6.0)	0.0001743	1	0.01363	0.1342	28	351	ZRSR2,ACTA1,AEBP1,FSCN1,SAMD4A,ADAM18,NARS1,BCL2,SOCS2,SUPT5H,GLRB,NPR3,RBPMS,CAPN3,SLC16A5,DDAH2,TMC6,COX5B,SYF2,FEZ1,CCN2,ITGAE,DDT,IVD,EXOG,MPPE1,NPRL3,LUM
Coexpression	M6693	Top marker genes in medulloblastoma associated with poor response to treatment (poor outcome).	MSigDB C2: CGP Curated Gene Sets (v6.0)	0.0001784	1	0.01366	0.1345	8	43	RPL27A,RPS8,RPS10,RPS18,RPL10A,UCHL1,COX8A,TRAP1
Coexpression	M19128	Genes down-regulated in tumor-conditioned vs quiescent endothelial cells and up-regulated upon treatment with decitabine and TSA [PubChem=451668;5562].	MSigDB C2: CGP Curated Gene Sets (v6.0)	0.0002015	1	0.01457	0.1435	11	80	F2RL2,APOE,IFI6,TGFB2,SERPINE2,CLU,UCP2,CLIP3,IGFBP3,GADD45A,P3H2
Coexpression	M2157	Genes down-regulated in MCF7 cells (breast cancer) at 24 h of estradiol [PubChem=5757] treatment.	MSigDB C2: CGP Curated Gene Sets (v6.0)	0.0002151	1	0.01457	0.1435	36	505	MAP2,IER5,EXT1,H4C8,MYL12A,RND3,PACS1,EFHD1,CYB5R1,SAMD4A,UNC13D,SOCS2,SQSTM1,MTCL1,OSGIN2,SHISA2,TGFB2,TGFB3,PDLIM1,ZNF277,UBE2QL1,PIK3IP1,DNAJB2,GDF15,IGFBP3,CCN2,DAPK3,IRF6,GADD45A,SMYD2,DIO2,TSC22D3,AKIRIN2,ORMDL3,EFNA1,LRRC1
Coexpression	M4913	Genes down-regulated in adipose tissue mesenchymal stem cells (ASC) vs bone marrow mesenchymal stem cells (rBMSC)	MSigDB C2: CGP Curated Gene Sets (v6.0)	0.0002164	1	0.01457	0.1435	13	108	MFAP4,SORBS2,ZSCAN18,LINC00672,RAB12,NPR3,TPD52L1,DHRS3,HSPA2,CRYAB,ASPN,KLHDC9,LTBP2
Coexpression	M10184	Genes up-regulated in monocytes by RUNX1-RUNX1T1 [GeneID=861;862] fusion.	MSigDB C2: CGP Curated Gene Sets (v6.0)	0.0002797	1	0.01806	0.1779	19	204	EXT1,PHLDA1,GLRX3,APOE,MT2A,ATP5ME,NES,EBNA1BP2,NME1,NPM1,DDR1,TNNT1,PFKP,UCHL1,HOMER3,GDF15,ISG15,RHOBTB1,FARP1
Coexpression	M2525	Transcripts bound to IGF2BP2 [GeneID=10644] complexes and differentially regulated in myoblasts with IGF2BP2 [GeneID=10644] knockdown by RNAi.	MSigDB C2: CGP Curated Gene Sets (v6.0)	0.0002846	1	0.01823	0.1796	13	111	RPS10,RPS27A,S100A6,FAU,DNAJC30,NACA,CCND1,FAM120AOS,PTPN21,SERPINE2,COX8A,CRYAB,HIGD2A
Coexpression	M16108	Genes down-regulated in SH-SY5Y cells (neuroblastoma) after treatment with epoxomicin [PubChem=3035402], a protease inhibitor causing apoptosis.	MSigDB C2: CGP Curated Gene Sets (v6.0)	0.0002875	1	0.01831	0.1803	17	172	MFAP4,PPFIA4,DNPH1,LINC00847,NDUFA2,NDUFB1,CENPA,HMGB2,PFKP,GTF2H5,TRAPPC6A,ICA1,CXCR4,STMN1,RLN2,LUM,MAB21L1
Coexpression	M4491	Genes down-regulated in ANBL-6 cell line (multiple myeloma, MM) expressing an activated form of NRAS [GeneID=4893] off a plasmid vector compared to those co-cultured with bone marrow stromal cells.	MSigDB C2: CGP Curated Gene Sets (v6.0)	0.0003507	1	0.02194	0.2161	12	99	SMARCD3,FSCN1,DEPP1,TPM1,CENPA,PPP1R15A,COL16A1,IGFBP3,HSPB6,CCN2,TSC22D3,STMN1
Coexpression	M6100	Genes down-regulated in U2OS cells (osteosarcoma) upon knockdown of HDAC1 [GeneID=3065] by RNAi.	MSigDB C2: CGP Curated Gene Sets (v6.0)	0.0003556	1	0.02211	0.2178	22	259	F2R,CYS1,SCN2B,FOXS1,IFI6,MYBL1,NAP1L3,TCEA2,RBPMS,VXN,RUNX2,TGFB2,CYTL1,DNAJB2,COL16A1,LINC00888,LYPD1,CRISPLD1,SYTL5,P3H2,LSP1,RASSF4
Coexpression	M1999	The 'adult tissue stem' module: genes coordinately up-regulated in a compendium of adult tissue stem cells.	MSigDB C2: CGP Curated Gene Sets (v6.0)	0.0003903	1	0.02402	0.2365	46	721	MAP2,IMPACT,RRAS,F2R,S100A1,S100A6,S100A13,MYL9,FGF1,PHLDA1,P3H3,SCG5,APOE,RAB20,DTD1,NAP1L3,GATM,CCND1,SMOC2,BGN,SOCS2,GADD45G,RBPMS,CAMK2B,GRIA3,GRID1,PTPN21,THBS4,TPD52L1,TPM1,PPP1R15A,DNAJB2,HSPA2,MDFIC,IGFBP3,ISG15,CCN2,HTRA1,IRF6,DBP,ITGAE,HSPB8,CERS4,LSP1,LTBP1,LTBP2
Coexpression	M17923	Genes up-regulated in cultured stromal stem cells from adipose tissue, compared to the freshly isolated cells.	MSigDB C2: CGP Curated Gene Sets (v6.0)	0.0003907	1	0.02402	0.2365	31	425	IER5,MFAP4,AEBP1,C1QTNF3,GPNMB,PHLDA1,SCG5,APOE,FRZB,MYBL1,DOK5,GADD45B,PER3,GADD45G,PER2,NPR3,DEPP1,OMD,TGFB2,TPD52L1,DDAH1,PPP1R15A,PIK3IP1,SERPINE2,AP2S1,UCHL1,GDF15,RHOBTB1,CLEC2B,PLXDC1,TSC22D3
Coexpression	M18491	Genes up-regulated by ESRRA [GeneID=2101] only.	MSigDB C2: CGP Curated Gene Sets (v6.0)	0.0004005	1	0.02424	0.2387	29	388	NPM3,MGST3,ATP5MG,RNASET2,NECAB3,MPC1,ST6GALNAC4,TRAK2,FSCN1,ATP5PO,NDUFA9,NDUFA10,SOCS2,SULT1A1,NPR3,OXA1L,ISCU,PAFAH2,TMC6,PFKP,LETMD1,GDF15,COX5B,COX7B,ATP5MPL,MFN2,DLD,WIPI1,SMIM8
Coexpression	M17471	Genes up-regulated in invasive ductal carcinoma (IDC) relative to ductal carcinoma in situ (DCIS, non-invasive).	MSigDB C2: CGP Curated Gene Sets (v6.0)	0.0004015	1	0.02424	0.2387	27	351	COPZ2,F2R,MFAP2,MYL9,AEBP1,GPNMB,SCG5,APOE,SAMD4A,ADAM19,BGN,GLRX,ESM1,THY1,HEY1,ITGBL1,SERPINE2,COL16A1,IGFBP3,CCN2,HTRA1,ASPN,CLEC2B,C1orf54,PLXDC1,EDNRA,LUM
Coexpression	M19693	Genes up-regulated in NHEK cells (normal keratinocytes) by UV-B irradiation.	MSigDB C2: CGP Curated Gene Sets (v6.0)	0.0004027	1	0.02424	0.2387	21	244	H2BC21,PHLDA1,SCG5,APOE,GADD45B,ATP5ME,SOX15,BCL2,ODC1,PPP1R15A,PFN1,TUBA4A,UBB,QPCT,HSPA2,C9orf16,COX7A2,CCN2,CYP2J2,PSMD8,GADD45A
Coexpression	M2256	Genes commonly down-regulated in UET-13 cells (mesenchymal progenitor) by expression of EWSR1 [GeneID=2130] fusions with ETS transcription factors FLI1 and ERG [GeneID=2313 ,2078].	MSigDB C2: CGP Curated Gene Sets (v6.0)	0.0004057	1	0.02424	0.2387	20	227	MAP2,PRR16,GPNMB,PHLDA1,SCG5,SMIM29,ZNF365,ARHGAP1,DOK5,ADAM19,FIBIN,B3GNT9,ENPP2,CHN1,NUDT7,IGFBP3,AK5,BMERB1,LTBP1,LUM
Coexpression	M1570	Genes up-regulated in non-apoptotic tissues (fetal liver) after MDM4 [GeneID=4194] knockout.	MSigDB C2: CGP Curated Gene Sets (v6.0)	0.0004057	1	0.02424	0.2387	20	227	RPS12,ETV4,NPM3,ARRDC3,PHLDA1,GLRX3,LLPH,ZNF365,MT2A,CIART,PFKP,ZNF688,PIK3IP1,SERPINE2,COX7A2,WTIP,CCN2,WIPI1,P3H2,TMEM143
Coexpression	M16336	Up-regulated genes in MM1.S cells (multiple myeloma) treated with adaphostin [PubChem=387042], a tyrosine kinase inhibitor with anticancer properties.	MSigDB C2: CGP Curated Gene Sets (v6.0)	0.0004571	1	0.02671	0.2631	15	147	IER5,MFAP4,PHLDA1,RND3,SQSTM1,GLRX,PPP1R15A,CLU,DNAJB2,IGFBP3,GADD45A,GAB2,TMCO3,CLEC2B,TMEM140
Coexpression	M2129	Genes up-regulated in confluent IMR90 cells (fibroblast) after knockdown of RB1 [GeneID=5925] by RNAi.	MSigDB C2: CGP Curated Gene Sets (v6.0)	0.0004723	1	0.02745	0.2704	38	566	COPZ2,SKA2,MDK,S100A6,MFAP4,MYL9,RPL22L1,VAT1L,ARHGAP1,FRZB,DOK5,NES,ADAM19,BGN,MTCL1,DEPP1,TMED4,SPX,THY1,PDLIM1,TPM1,DHRS3,CHN1,ITGBL1,CLU,CTHRC1,NUDT7,ICA1,CLIP3,HSPB6,TRNP1,MAP3K7CL,AK5,EXOG,TPT1-AS1,FARP1,LTBP2,RASSF4
Coexpression	M10573	Genes that contributed maximally to the GSEA score of the up-regulated gene set from the KrasLA mouse model in two human lung cancer expression data sets comparing mutant vs normal KRAS [GeneID=3845].	MSigDB C2: CGP Curated Gene Sets (v6.0)	0.0005168	1	0.02751	0.271	11	89	S100A1,SLC25A5,PHLDA1,PABPC1,MT2A,CCND1,GLRX,TNNT1,PCBD1,GADD45A,RABGGTB
Coexpression	M18086	'Cancer prone response profile' (CPRP): genes common to estradiol and bisphenol A [PubChem=5757;6623] response of epithelial cell cultures from patients at high risk of breast cancer.	MSigDB C2: CGP Curated Gene Sets (v6.0)	0.0005179	1	0.02751	0.271	13	118	RPS6,C1QTNF3,SLC25A6,SGCA,ANP32B,GATM,EBNA1BP2,TNNT1,TPM1,HMGB2,HMGN2,COX8A,PSMB2
Coexpression	M15549	Genes turned on in Hep3B cells (hepatocellular carcinoma, HCC) upon knockdown of SDHB [GeneID=6390] by RNAi.	MSigDB C2: CGP Curated Gene Sets (v6.0)	0.0005179	1	0.02751	0.271	13	118	S100A6,MFAP4,RAB20,DYRK4,SOCS2,DNAAF3,CLIC6,LEFTY2,TNNT1,FEZ1,HTRA1,LYPD1,BMERB1
Coexpression	M12602	Genes positively correlated with recurrence free survival in patients with hepatitis B-related (HBV) hepatocellular carcinoma (HCC).	MSigDB C2: CGP Curated Gene Sets (v6.0)	0.0006028	1	0.02751	0.271	12	105	EXT1,S100A6,BCL2,DDR1,TGFB2,ENPP2,PFKP,VEGFB,CRYAB,IGFBP3,CCN2,PLCE1
Coexpression	M1103	Genes up-regulated in ME-A cells (breast cancer) undergoing apoptosis in response to doxorubicin [PubChem=31703].	MSigDB C2: CGP Curated Gene Sets (v6.0)	0.0006347	1	0.02872	0.2829	65	1141	IMPACT,IER5,EXTL1,IL17D,S100A1,S100A13,H2BC21,GTF2IRD2,C12orf45,SGCA,GLRX3,PLEKHA4,FAM214B,MARK4,ST6GALNAC4,ALDH4A1,C9orf78,MOAP1,RRAGC,STAU1,H2AW,ZPR1,DDR1,CAMK2B,TRIM41,SHISA2,TEAD3,TGFB3,GTF2B,PDLIM1,CYSRT1,TMC6,PPP1R15A,TP53INP2,TUBA4A,SERPINE2,CBY1,DNAJB2,ARL16,GDF15,LENG1,UBALD2,NDUFA11,TKFC,ISG15,FEZ1,CSTB,MASP1,IRF6,GADD45A,IVD,CXCR4,CLBA1,TRPT1,KIF22,RAD9A,WIPI1,DRG2,MAFK,FRMD8,PPCS,EFNA…
Coexpression	M14665	Genes up-regulated in lymphoblastoid cells from the European population compared to those from the Asian population.	MSigDB C2: CGP Curated Gene Sets (v6.0)	0.000677	1	0.03038	0.2992	33	478	RPL27A,MAP4,RPS8,MEA1,FAU,TADA3,ARHGAP1,UQCRQ,ATP5ME,NACA,NAP1L1,NDUFA2,NDUFB1,BANF1,SUPT5H,TAF10,TBCA,NPM1,ELOB,GRK6,TMC6,PFN1,TERF2IP,MYL6B,UCP2,COX5B,COX6C,CSTB,DDT,IVD,KIF22,ATP5IF1,NUBP2
Coexpression	M2424	Genes up-regulated in neonatal cardiac myocytes upon knockdown of BCL3 [GeneID=602] by RNAi.	MSigDB C2: CGP Curated Gene Sets (v6.0)	0.0007014	1	0.03121	0.3074	27	364	VGLL2,IMPACT,MYL9,MYBL1,ATP5ME,GATM,NDUFA2,GLRX,ACOT2,CTXN1,PEX11G,TGFB2,TGFB3,UBE2QL1,TNNT1,PENK,HMGB2,UCP2,DNAJB2,IGSF1,MASP1,IRF6,SLC30A2,TXNL4B,CERS4,KIF22,TMEM140
Coexpression	M12144	Genes down-regulated in primary fibroblast cell culture after infection with HCMV (AD169 strain) at 48 h time point that were not down-regulated at the previous time point, 24 h.	MSigDB C2: CGP Curated Gene Sets (v6.0)	0.0007894	1	0.03385	0.3334	34	502	MAP2,S100A13,MYL9,DLGAP4,FAM214B,IAH1,LYRM9,NAP1L1,NAP1L3,CCND1,DYRK4,PER2,RBPMS,ESM1,PTPN21,SLC16A5,PRAF2,HBB,ENPP2,CBY1,FADS2,PRMT2,TRAPPC6A,MDFIC,COL16A1,ZFPL1,IGFBP3,HSPB6,MAP2K5,MASP1,WIPI1,RENBP,SPRYD7,LTBP2
Coexpression	M3284	Myeloid leukemia model in mice with germ-line MLL-AF9 fusion knock-in [GeneID=4297;4300]: genes changed in comparison among the leukemic, preleukemic and wild-type animals.	MSigDB C2: CGP Curated Gene Sets (v6.0)	0.0007945	1	0.03385	0.3334	29	405	F2R,F2RL2,FCER1A,ST6GALNAC4,DTD1,B4GALNT1,DDR1,RBPMS,TXNDC17,ODC1,THY1,PDLIM1,PCBP2,PCCB,DDAH2,PENK,PEX7,PFKP,TP53INP2,HPS1,ICA1,ISG15,CYP11A1,RABGGTB,ZDHHC14,S1PR1,ORMDL3,LEF1,SMIM30
Coexpression	M12921	Genes up-regulated in brain from patients with Alzheimer's disease.	MSigDB C2: CGP Curated Gene Sets (v6.0)	0.0008622	1	0.03624	0.357	89	1690	RPL27A,RIN3,MAP4,ZRSR2,PAK4,MBP,RPS10,PI4K2A,TNIP1,BFAR,F2R,MAP3K3,H2BC21,AEBP1,H4C8,FGF1,SFRP4,ANP32B,MACROD1,ITGA10,PABPC1,SLC1A7,ARHGAP1,MT2A,CCDC59,PELP1,RNASET2,CHFR,ST6GALNAC4,TRAK2,MYBL1,GADD45B,NAP1L1,BCL2,BGN,RRAGC,STAU1,GADD45G,PER2,KCNMB4,OSGIN2,DDR1,RBPMS,ADAP1,GRK6,CAPN3,ODC1,RUNX2,TGFB2,DMC1,ZNF277,TPD52L1,TMC6,HMGCL,PPP1R15A,SNHG20,PHF1,MRPL57,CLU,CLIC1,PRMT2,DNAJB2,HOMER3,C9orf16,…
Coexpression	M19062	Genes up-regulated in nasopharyngeal carcinoma (NPC) compared to the normal tissue.	MSigDB C2: CGP Curated Gene Sets (v6.0)	0.0008805	1	0.03677	0.3621	94	1805	CNKSR1,RIN3,MNS1,MBP,IFT43,S100A6,H2BC21,KDM7A-DT,ALDH3B1,KLHDC8B,RHCG,SORBS2,NUDT14,SLC27A6,SHLD1,CCDC113,SCUBE2,NT5C2,B9D1,ARRDC2,LAYN,PSENEN,LCA5L,GATM,BBS4,LIN7B,DNAAF3,PROM1,ADHFE1,PER2,PRRT3,KIAA0556,C9orf24,OSCP1,B3GNT9,PEX11G,TRIM41,GRK6,SPACA9,CLIC6,PTPN21,LEFTY2,SLC16A5,HEY1,SH3D19,TM7SF2,TTC9,CYSRT1,DDAH2,WDR66,DHRS3,HMGCL,TP53INP2,TUBA4A,PIK3IP1,C16orf89,PHF1,DUSP26,CLU,CBY1,UCP2,C11o…
Coexpression	M1475	Genes down-regulated in kidney biopsies from patients with acute transplant rejection compared to the biopsies from patients with well functioning kidneys more than 1-year post transplant.	MSigDB C2: CGP Curated Gene Sets (v6.0)	0.0009097	1	0.0375	0.3693	36	546	GATD3A,F2R,FGF1,MRPS18B,R3HDM2,DNPH1,AKR7A2,EFHD1,GHITM,UQCRQ,ALDH4A1,EIF3I,ATP5PO,GATM,NARS1,GLRX,EBNA1BP2,RBPMS,OXA1L,PCBD1,PCBP2,DDX19B,HGD,ENPP2,SLC26A4,PEX7,HMGCL,COX7A1,COX7B,CRYAB,CRYM,HTRA1,DDT,RHOBTB1,DLD,RABGGTB
Coexpression	M2328	Genes translationally regulated in MEF cells (embryonic fibroblasts) in response to serum starvation and by rapamycin (sirolimus) [PubChem=6610346].	MSigDB C2: CGP Curated Gene Sets (v6.0)	0.0009966	1	0.0403	0.3969	9	68	RPL27A,RPS3,RPS6,RPS8,RPS10,RPS27A,FAU,COX7A2L,RPL5
Coexpression	M3002	Genes down-regulated in MCF-7 cells (breast cancer) by estradiol (E2) [PubChem=5757].	MSigDB C2: CGP Curated Gene Sets (v6.0)	0.001018	1	0.04072	0.401	10	82	H2BC21,RND3,ALDH4A1,TGFB2,TGFB3,SLC16A5,TTC9,CLU,RENBP,EFNA1
Coexpression	M9065	Genes up-regulated in C2AS12 cells (myoblast) by IGF1 [GeneID=3479] vs PDGFB [GeneID=5155].	MSigDB C2: CGP Curated Gene Sets (v6.0)	0.001018	1	0.04072	0.401	10	82	ACTA1,SYNPO2L,SGCA,SGCG,PPFIA4,LMOD2,GATM,TNNT1,TPM1,HJV
Coexpression	M19976	Genes up-regulated during differentiation of immature to mature B lymphocyte.	MSigDB C2: CGP Curated Gene Sets (v6.0)	0.001045	1	0.04148	0.4086	7	43	APOE,PACS1,ARL2,BCL2,CUX2,CENPA,JAK2
Coexpression	M16692	Genes down-regulated by MYCN [GeneID=4613] but not by its transactivation-defficient, trunkated form N-Myc-delta-73.	MSigDB C2: CGP Curated Gene Sets (v6.0)	0.001045	1	0.04148	0.4086	7	43	COPZ2,MYL9,MYL5,GRIA3,DDAH2,COX7A1,CRYAB
Coexpression	M8751	Genes co-regulated in uterus during a time course response to progesterone [PubChem=5994]: SOM cluster 14.	MSigDB C2: CGP Curated Gene Sets (v6.0)	0.001051	1	0.04156	0.4093	14	143	ACTA1,FGF1,SLC25A5,MRPS18B,UQCC2,NARS1,BANF1,EBNA1BP2,NME1,ODC1,SERPINE2,C9orf16,ATF6B,SMYD2
Coexpression	M6641	Genes down-regulated in primary fibroblast cell culture after infection with HCMV (AD169 strain) at 18 h time point that were not down-regulated at the previous time point, 16 h.	MSigDB C2: CGP Curated Gene Sets (v6.0)	0.001065	1	0.04166	0.4103	16	176	GATD3A,ACTA1,TNIP1,EXT1,RRAS,S100A1,ALDH3B1,P3H3,ARHGAP1,RBPMS,ZNF688,ZFPL1,CLIP3,MAP2K5,DDT,RAD23A
Coexpression	M863	Myb-regulated genes in MCF7 (breast cancer) and lung epithelial cell lines overexpressing MYBL2, MYBL1 or MYB [GeneID=4605;4603;4602].	MSigDB C2: CGP Curated Gene Sets (v6.0)	0.00107	1	0.04167	0.4104	24	318	TNIP1,MDK,MYL9,ANP32B,MYL12A,SOX15,CCND1,FASTK,NME1,DDR1,TM7SF2,PCCB,TPM1,DHRS3,TUBA4A,SERPINE2,CLU,FADS2,COX7A1,CRYAB,ISG15,IRF6,TSC22D3,LUM
Coexpression	M1966	Genes with low-CpG-density promoters (LCP) bearing tri-methylation mark at H3K4 (H3K4me3) in MEF cells (embryonic fibroblasts).	MSigDB C2: CGP Curated Gene Sets (v6.0)	0.001118	1	0.04314	0.4249	13	128	SCN2B,GLRX,DDR1,PKIG,P2RX6,GPR173,MASP1,CYP2J2,ASPN,DAPK3,C1orf54,LSP1,LUM
Coexpression	M10540	Genes up-regulated in gastric cancer cell lines resistant to 5-fluorouracil [PubChem=3385].	MSigDB C2: CGP Curated Gene Sets (v6.0)	0.001165	1	0.04426	0.4359	5	22	LINC01278,MDK,GPNMB,CLU,KLC1
Coexpression	M2113	Genes whose expression in brain significantly and negatively correlated with the duration of all psychiatric disorders studied.	MSigDB C2: CGP Curated Gene Sets (v6.0)	0.001203	1	0.04459	0.4391	14	145	RPS8,UQCRQ,NDUFB1,PFDN1,TUBA4A,TUFM,DNAJB2,C9orf16,NDUFAF3,COX7A1,COX8A,CRYAB,BMERB1,TRAP1
Coexpression	M1694	Genes from the brain cancer stem (cancer stem cell, CSC) signature.	MSigDB C2: CGP Curated Gene Sets (v6.0)	0.001203	1	0.04459	0.4391	7	44	S100A6,SCG5,BGN,VXN,SHISA2,DHRS3,CYTL1
Coexpression	M2193	Genes up-regulated in liver samples of liver-specific knockout of HNF4A [GeneID=3172].	MSigDB C2: CGP Curated Gene Sets (v6.0)	0.001203	1	0.04459	0.4391	7	44	GADD45B,PROM1,PER3,CA3,DDR1,QPCT,HSPA2
Coexpression	M3844	Proteins that interact with PTTG1 [GeneID=9232], based on protein array.	MSigDB C2: CGP Curated Gene Sets (v6.0)	0.001278	1	0.0467	0.4599	8	57	RPS10,ATAT1,LLPH,C7orf50,ATP5PO,TRIM41,HMGN2,KIAA1191
Coexpression	M14524	Up-regulated genes in colon carcinoma tumors compared to the matched normal mucosa samples.	MSigDB C2: CGP Curated Gene Sets (v6.0)	0.001303	1	0.04698	0.4627	51	870	RPL27A,RPS3,RPS6,RPS8,ETV4,S100A6,DLGAP4,MACROD1,EIF3I,IFI6,NDUFA4,DPM1,BANF1,BGN,STAU1,RPL10A,BPI,NSFL1C,KIAA0556,NME1,TBCA,ELOB,C19orf48,ODC1,BORCS8,SYNGR2,PCBP2,TPM3,DDAH1,PDHB,TMC6,HMGB2,TUFM,MRPL57,CLIC1,GTF2H5,VEGFB,PPDPF,ICA1,ATF6B,PPP4C,CSTB,ABHD11,PSMD8,IVD,DNAAF5,RAD23A,MAFK,RBM3,TSPAN32,TRAP1
Coexpression	M19666	Genes down-regulated in Caco-2 cells (intestinal epithelium) after coculture with the probiotic bacteria L. casei for 24h.	MSigDB C2: CGP Curated Gene Sets (v6.0)	0.001317	1	0.04698	0.4627	18	214	RPL27A,RPS3,RPS6,RPS18,ALDH3B1,PHLDA1,PABPC1,ST6GALNAC4,SQSTM1,GLRX,ZNF277,PPP1R15A,SDF2L1,GDF15,SNHG32,TMCO3,WIPI1,RPL5
Coexpression	M9583	Genes down-regulated in five primary endothelial cell types (lung, aortic, iliac, dermal, and colon) by IFNG [GeneID=3458].	MSigDB C2: CGP Curated Gene Sets (v6.0)	0.001346	1	0.04698	0.4627	10	85	MGST3,NDUFA4,RPL10A,NME1,ESM1,ODC1,HMGCL,UQCR10,TUBA4A,SMYD2
Coexpression	M4911	Genes down-regulated in peripheral blood mononuclear cells (PBMC) from sickle cell disease patients compared to those from healthy subjects.	MSigDB C2: CGP Curated Gene Sets (v6.0)	0.00135	1	0.04698	0.4627	16	180	RPS6,LINC01278,RPS27A,SLC25A6,ANP32B,RNF126,NACA,NAP1L1,RPL10A,MICA,NPM1,TMC6,COX6C,CXCR4,TSC22D3,RPL5
Coexpression	M7577	Genes down-regulated in hepatocellular carcinoma (HCC) compared to normal liver samples.	MSigDB C2: CGP Curated Gene Sets (v6.0)	0.001426	1	0.04698	0.4627	35	540	NUDT14,PHLDA1,MACROD1,RND3,MT2A,OGDHL,MPC1,TRAPPC2L,SAMD4A,GATM,CCND1,TSPAN9,BGN,PEX11G,RPUSD4,PAFAH2,TM7SF2,HBA1,ZBED1,PCBP2,HMGCL,PPP1R15A,TERF2IP,SLC25A23,RAB26,TRAPPC6A,CCDC28A,IRX1,TKFC,IGFBP3,TMEM30B,DCAF8,MFN2,CERS4,ZDHHC14
Coexpression	M1453	Genes correlated with the development of hyperglycemia in obese mice.	MSigDB C2: CGP Curated Gene Sets (v6.0)	0.001434	1	0.04698	0.4627	8	58	ACYP2,MRPS18B,POLR1E,MKRN2,HPS1,COX7B,DVL3,RENBP
Coexpression	M2018	Genes with low-CpG-density promoters (LCP) bearing histone H3 trimethylation mark at K4 (H3K4me3) in neural progenitor cells (NPC).	MSigDB C2: CGP Curated Gene Sets (v6.0)	0.001434	1	0.04698	0.4627	8	58	FGF1,GLRX,DDR1,GPR173,MASP1,CYP2J2,DAPK3,C1orf54
Coexpression	M2332	Genes translationally up-regulated by serum in MEF cells (embryonic fibroblast) lacking TSC1 [GeneID=7248].	MSigDB C2: CGP Curated Gene Sets (v6.0)	0.001443	1	0.04698	0.4627	5	23	MFAP4,PHLDA1,RND3,C19orf48,TUBA4A
Coexpression	M2242	Category A genes: p53-dependent genes whose expression in the absence of S389 phosphorylation is similar to loss of TP53 [GeneID=7157] in MEF (embryonic fibroblast) cells in response to UV-C irradiation.	MSigDB C2: CGP Curated Gene Sets (v6.0)	0.001456	1	0.04698	0.4627	52	896	DCAKD,MAP4,MGST3,MYL12A,RND3,SMARCD3,SNCA,GATM,BCL2,NDP,TSPAN9,C1orf122,C9orf24,KCNMB4,DDR1,VXN,THY1,P2RX1,PCNX4,CORO6,COX7A2L,TTC9,TNNT1,SNAPIN,HGD,DHRS3,COL22A1,MYL7,UBB,RAB33A,MYOZ1,SEMA5B,UCP2,CTHRC1,SLC25A23,PNKD,CLIP3,PPP2R2B,CTF1,RIPOR2,CYP11A1,DAD1,KCNE1,TMEM163,C14orf119,AGTRAP,DPH1,MKRN2OS,EDNRA,UCMA,SPRYD7,ACE2
Coexpression	M14127	Genes up-regulated in multiple myeloma (MM) cell lines treated with both decitabine [PubChem=451668] TSA [PubChem=5562].	MSigDB C2: CGP Curated Gene Sets (v6.0)	0.001474	1	0.04698	0.4627	31	461	RRAS,H2AC6,H2BC21,MGST3,H4C8,TADA3,APOE,BEX3,MT2A,CSPG5,OGDHL,SMARCD3,ALDH4A1,FSCN1,IFI6,MYBL1,NAP1L3,H2AW,SQSTM1,ODC1,ORC5,HBA1,HBA2,TPM1,DDAH2,ENPP2,ITGBL1,SERPINE2,HSPA2,IGFBP3,TMEM143
Coexpression	M3645	Genes up-regulated in papillary thyroid carcinoma (PTC) compared to normal tissue.	MSigDB C2: CGP Curated Gene Sets (v6.0)	0.001566	1	0.04698	0.4627	30	443	MAP2,RRAS,MDK,S100A1,S100A13,MFAP2,FGF1,ALDH3B1,SCG5,APOE,SAMD4A,CCND1,NCDN,GLRB,MLLT11,ODC1,CBLN1,PDLIM1,SYNGR2,PRAF2,DHRS3,TMC6,UCP2,QPCT,C9orf16,GDF15,PPP4C,IGFBP3,IGSF1,BMERB1
Coexpression	M1806	Direct targets of FOXA2 [GeneID=3170] in liver, according to a ChIP-chip analysis.	MSigDB C2: CGP Curated Gene Sets (v6.0)	0.00166	1	0.04877	0.4803	29	425	PI4K2A,F2RL2,AFMID,KLF15,APOE,MT2A,GHITM,NDUFA2,DPM1,BANF1,PER2,DEPP1,OMD,SH3D19,GYS1,HGD,HMGB2,HPS1,ISG15,HACL1,IL11RA,DAD1,CXCR4,TXNL4B,MAFK,RENBP,TRAP1,EFNA1,TMEM140
Coexpression	M8910	Genes up-regulated in fibroblasts from old individuals, compared to those from young donors.	MSigDB C2: CGP Curated Gene Sets (v6.0)	0.001672	1	0.04885	0.4811	3	7	FMOD,CRYAB,HTRA1
Coexpression	M2775	Genes down-regulated in DAOY cells (medulloblastoma) upon knockdown of BMI1 and PCGF2 [Gene ID=648, 7703] genes by RNAi.	MSigDB C6: Oncogenic Signatures (v6.0)	1.13e-05	0.1202	0.002037	0.02007	18	147	H2BC21,APOE,MSRB2,EFHD1,OGDHL,IFI6,DOK5,SOCS2,PROM1,TCEA2,CUX2,PENK,CYTL1,CLIP3,SPAG16,C1orf54,EDN3,TSFM
Coexpression	M2783	Genes down-regulated in DAOY cells (medulloblastoma) upon knockdown of PCGF2 [Gene ID=7703] gene by RNAi.	MSigDB C6: Oncogenic Signatures (v6.0)	0.0004914	1	0.02751	0.271	15	148	H4C8,PLEKHA4,APOE,EFHD1,IFI6,DOK5,SOCS2,PROM1,CUX2,PENK,TRAPPC6A,CLIP3,DIO2,C1orf54,TSFM
Coexpression	M2636	Genes up-regulated in MCF-7 cells (breast cancer) positive for ESR1 [Gene ID=2099] and engineered to express ligand-activatable ERBB2 [Gene ID=2064].	MSigDB C6: Oncogenic Signatures (v6.0)	0.000956	1	0.03911	0.3852	17	191	S100A6,ZNF365,PACS1,ALDH4A1,TCEA2,HEY1,TTC9,TNNT1,PACSIN3,PLEKHB1,FADS2,HSPA2,VEGFB,DNAJC4,GDF15,CXCR4,WIPI1
Coexpression	M2781	Genes down-regulated in DAOY cells (medulloblastoma) upon knockdown of BMI1 [Gene ID=648] gene by RNAi.	MSigDB C6: Oncogenic Signatures (v6.0)	0.001125	1	0.04319	0.4254	14	144	H2BC21,H4C8,PLEKHA4,KLF15,MSRB2,EFHD1,IFI6,DOK5,SOCS2,TNNT1,TRAPPC6A,CLIP3,CYP11A1,C1orf54
Coexpression	M3329	Genes down-regulated in comparison of polysome bound (translated) mRNA versus total mRNA 4 h after LPS (TLR4 agonist) stimulation.	MSigDB C7: Immunologic Signatures (v6.0)	1.313e-07	0.001397	6.349e-05	0.0006253	25	198	AMZ2,MFAP4,CDC26,UQCRQ,LINC00672,JAGN1,NDUFA2,NDUFB1,UQCR11,TAF10,GNG5,C19orf25,RAB12,ELOB,FOXN3-AS1,BORCS8,LINC01588,HMGN2,PRMT2,PPDPF,NDUFAF3,NDUFA11,CRYM,ZFAS1,NKIRAS2
Coexpression	M9894	Genes down-regulated in plasmacytoid dendritic cells: wildtype versus GFI1 [GeneID=2672] knockout.	MSigDB C7: Immunologic Signatures (v6.0)	6.001e-07	0.006382	0.0002059	0.002028	24	200	NPM3,SLC25A6,DNPH1,UQCRQ,EIF3I,TRAPPC2L,ATP5PO,NDUFA2,FASTK,EBNA1BP2,NME1,UQCR11,TBCA,HMGN2,PFKP,UQCR10,TFPT,COX8A,MRPL40,RIPOR2,PSMD8,DDT,ATP5IF1,SAE1
Coexpression	M10033	Genes down-regulated in macrophages: control versus colorectal adenocarcinoma conditioned.	MSigDB C7: Immunologic Signatures (v6.0)	1.973e-06	0.02098	0.000559	0.005505	23	199	CNKSR1,ACYP2,MACROD1,ITGA10,SMARCD3,NDUFA10,ADHFE1,FASTK,RAB12,CAMK2B,CORO6,SNAPIN,PACSIN3,BOD1,DNAJB2,VEGFB,HJV,DELE1,DES,KCNC4,HSPB8,TRPT1,MYOZ3
Coexpression	M6265	Genes up-regulated in thymic epithelial cells: cortical (cTEC) versus medullary (mTEC).	MSigDB C7: Immunologic Signatures (v6.0)	2.151e-06	0.02288	0.000572	0.005633	23	200	DCAKD,SNAPC5,MAP3K3,NPM3,RPL22L1,SGCG,UQCC2,RAB20,MTLN,ARRDC2,NDUFA2,ARID5A,SMIM4,RAB24,PRRT3,COX14,DHRS3,GABARAPL2,GTF2H5,SYF2,PRKAB1,AGTRAP,ATP5IF1
Coexpression	M6963	Genes up-regulated in plasmacytoid dendritic cells in response to influenza virus infection: 1h versus 4h.	MSigDB C7: Immunologic Signatures (v6.0)	6.781e-06	0.07212	0.001568	0.01544	22	199	IER5,TNIP1,S100A1,S100A6,TADA3,RAB20,FSCN1,NDP,THY1,P2RX1,MTURN,HMGCL,TUFM,FADS2,COL16A1,FAAP20,ZFPL1,IL11RA,CERS4,RAD23A,TANGO2,TMEM140
Coexpression	M6204	Genes up-regulated in polymorphonuclear leukocytes (24h): control versus infection by A. phagocytophilum.	MSigDB C7: Immunologic Signatures (v6.0)	7.353e-06	0.0782	0.001596	0.01572	22	200	RPL27A,RPS3,RPS6,RPS8,RPS10,RPS18,S100A6,RPL22L1,ANP32B,ATP5MG,RNASET2,GHITM,EIF3I,C12orf57,TBCA,NPM1,PDLIM1,TPM3,PDHB,CLU,ISG15,RPL5
Coexpression	M9540	Genes up-regulated in bone marrow-derived mast cells treated with IL3 [GeneID=3562]: control versus IL33 [GeneID=90865].	MSigDB C7: Immunologic Signatures (v6.0)	7.353e-06	0.0782	0.001596	0.01572	22	200	MGST3,SLC25A6,ATP5MG,UQCRQ,ALDH4A1,NACA,GATM,NDUFA4,DYRK4,ADA2,UQCR11,ELOB,PCBP2,HMGB2,AP2S1,HPS1,VEGFB,DBP,ITGAE,SMYD2,SNHG32,HIGD2A
Coexpression	M6986	Genes up-regulated in naïve untreated macrophages versus tolerant macrophages stimulated by LPS.	MSigDB C7: Immunologic Signatures (v6.0)	2.393e-05	0.2545	0.003688	0.03632	21	200	MEA1,S100A6,APOE,ARL2,BGN,CUX2,THY1,P2RX1,PAFAH2,SDSL,SERPINE2,FADS2,COL16A1,ICA1,COX8A,ZFPL1,IL11RA,IRF6,GADD45A,DIO2,ORMDL3
Coexpression	M8498	Genes down-regulated in B16 melanoma (day 7): untreated versus mock treatment during adoptive transfer therapy.	MSigDB C7: Immunologic Signatures (v6.0)	2.393e-05	0.2545	0.003688	0.03632	21	200	IFT43,RPL22L1,PHLDA1,MTLN,NDUFA2,TSPAN9,SQSTM1,EBNA1BP2,NPM1,NPR3,GRM1,PRAF2,PFN1,PIK3IP1,CLU,DNAJB2,IFT22,COX6C,COX8A,C1orf54,ATP5IF1
Coexpression	M6067	Genes up-regulated in CD4 [GeneID=920] T cells activated by anti-CD3 and anti-CD28: TGFB1 [GeneID=7040] and IL-12 (6h) versus untreated (6h).	MSigDB C7: Immunologic Signatures (v6.0)	2.393e-05	0.2545	0.003688	0.03632	21	200	RIN3,SFRP4,RNASET2,BBS4,ADA2,H2AW,CUX2,OXA1L,SLC16A5,PDLIM1,DHRS3,PIK3IP1,LETMD1,IL11RA,DCAF8,C14orf132,SNHG32,CXCR4,PLXDC1,TSC22D3,BMERB1
Coexpression	M3785	Genes up-regulated in comparison of control dendritic cells (DC) at 6 h versus those stimulated with Gardiquimod (TLR7 agonist) at 6 h.	MSigDB C7: Immunologic Signatures (v6.0)	2.393e-05	0.2545	0.003688	0.03632	21	200	COPZ2,RPS3,USP11,RPS8,MBP,CHCHD6,AKR7A2,NDUFA10,SUPT5H,ZNF277,CENPA,HMGB2,HMGCL,PLA2G15,MYOZ1,NUDT7,SYF2,FBXL12,IVD,C1orf54,LSP1
Coexpression	M6936	Genes up-regulated in B lymphocytes: CpG oligodeoxynucleotide 1826 versus PL2-3 (Chromatin IC).	MSigDB C7: Immunologic Signatures (v6.0)	2.393e-05	0.2545	0.003688	0.03632	21	200	OARD1,MED30,TMEM242,TMBIM4,B9D1,TRAPPC2L,ATP6V1G2,MTURN,PEX7,GABARAPL2,CBY1,NUDT7,IFT22,ARL16,COX7A1,PRKACA,HIGD2A,SMIM8,TSPAN32,APIP,SMIM30
Coexpression	M4379	Genes up-regulated in comparison of lung tissue from wild type mice subjected to ozone for 0 h versus that from TLR4 [GeneID=7099] deficient mice subjected to ozone for 48 h.	MSigDB C7: Immunologic Signatures (v6.0)	2.393e-05	0.2545	0.003688	0.03632	21	200	RPS3,P3H3,SNCA,PER3,NKG7,TNNI3,ENPP2,MKRN2,UCP2,PEX16,HOMER3,ICA1,XPA,IGFBP3,DBP,IVD,C1orf54,PLXDC1,ST8SIA2,RPL5,PLCE1
Coexpression	M6902	Genes up-regulated in macrophages with IL10 [GeneID=3586] knockout in response to 30 min treatment by: LPS versus LPS and IL10 [GeneID=3586].	MSigDB C7: Immunologic Signatures (v6.0)	5.987e-05	0.6367	0.007178	0.0707	20	197	CNKSR1,EIF3J-DT,S100A6,KLHDC8B,BEX3,SEL1L2,TMEM42,RPL10A,PROM1,NPR3,RBPMS,GPR27,SDSL,CYTL1,CLIC1,CLNS1A,PRMT2,HSD17B8,SMIM10L1,COQ4
Coexpression	M8736	Genes down-regulated in T cells: control versus IL2 [GeneID=3558] stimulation for 2h.	MSigDB C7: Immunologic Signatures (v6.0)	6.428e-05	0.6836	0.007178	0.0707	20	198	GATD3A,SNAPC5,PI4K2A,S100A1,SHB,TMEM134,ATP5ME,TMEM126B,NDUFA4,DMAC1,C1orf198,COL22A1,MYOZ1,COX5B,COX7B,ATP5MPL,NRIP3,KCNE1,TSPAN32,LSP1
Coexpression	M8117	Genes up-regulated in macrophages stimulated by LPS: IL10 [GeneID=3586] knockout versus IL10 and NFKB1 [GeneID=3586;4790] knockout.	MSigDB C7: Immunologic Signatures (v6.0)	6.899e-05	0.7337	0.007178	0.0707	20	199	MORN4,PTRHD1,MED30,VAT1L,TRAPPC2L,ATP5PO,PROM1,P2RX6,ISCU,WDR66,GABARAPL2,AP2M1,SERPINE2,BMP8A,TOMM7,GDF15,COX6C,COX7A2,TSFM,LEF1
Coexpression	M3843	Genes down-regulated in comparison of dendritic cells (DC) stimulated with poly(I:C) (TLR3 agonist) at 16 h versus DC cells stimulated with Pam3Csk4 (TLR1/2 agonist) at 16 h.	MSigDB C7: Immunologic Signatures (v6.0)	7.399e-05	0.7869	0.007178	0.0707	20	200	GATD3A,RRAS,S100A13,GLRX3,MRPS18B,YIPF4,SEC31A,TARS2,AKR7A2,FAM214B,RND3,SNCA,MLLT11,UQCR11,PAFAH2,MRPL57,DRG2,NPRL3,SDHAF4,SMIM30
Coexpression	M6185	Genes down-regulated in C57BL6 CD4 CD8 double positive thymocyte transgenic for the BDC2.5 TCR incubated with no peptide 0h versus C57BL6 CD4 CD8 double positive thymocyte transgenic for the BDC2.5 TCR incubated with mimetope negative sel 16h.	MSigDB C7: Immunologic Signatures (v6.0)	7.399e-05	0.7869	0.007178	0.0707	20	200	TSR2,MORN4,PI4K2A,NUDT14,KLF15,CHCHD6,PACS1,CDC26,EFHD1,RASL11B,CYB5R1,UNC13D,TBCA,NPM1,C1orf198,SLC26A4,MPPE1,ATP5IF1,RPL5,PLCE1
Coexpression	M9691	Genes up-regulated in CD4 [GeneID=920] T helper cells (60h): Th0 versus Th17 treated with TGFB1, IL6 [GeneID=7040;3569] and IL-23.	MSigDB C7: Immunologic Signatures (v6.0)	7.399e-05	0.7869	0.007178	0.0707	20	200	MAP2,MBP,MGST3,PHLDA1,APOE,ST6GALNAC4,BCL2,BGN,ODC1,RUNX2,TM7SF2,DDAH2,MKRN2,PEX7,C11orf1,CCN2,PSMD8,IVD,TSC22D3,LEF1
Coexpression	M7208	Genes down-regulated in tumors established by injecting MC38 cells (colon cancer): control versus CpG oligodeoxynucleotide 1826.	MSigDB C7: Immunologic Signatures (v6.0)	7.399e-05	0.7869	0.007178	0.0707	20	200	ACOT4,S100A1,S100A6,PTRHD1,GLRX3,LYAR,UQCRQ,GADD45B,ATP5ME,ADAM19,MOAP1,NKG7,ODC1,SYNGR2,CENPA,HMGB2,ANAPC13,MDFIC,DDT,STMN1
Coexpression	M3867	Genes up-regulated in comparison of dendritic cells (DC) stimulated with Pam3Csk4 (TLR1/2 agonist) at 12 h versus DC cells stimulated with CpG DNA (TLR9 agonist) at 12 h.	MSigDB C7: Immunologic Signatures (v6.0)	7.399e-05	0.7869	0.007178	0.0707	20	200	MRPL37,S100A6,SEC31A,RNASET2,EIF3I,CYB5R1,NDUFA4,NDUFA9,YIF1A,NPM1,PRAF2,AGBL5,MRPL57,C9orf16,COL9A1,POLR2E,COX8A,NDUFA11,RBM3,EFNA1
Coexpression	M6200	Genes up-regulated in polymorphonuclear leukocytes (24h): treated by heat killed HC60 cell (promyelocytic leukemia) lysate versus A. phagocytophilum infection.	MSigDB C7: Immunologic Signatures (v6.0)	7.399e-05	0.7869	0.007178	0.0707	20	200	COPZ2,IFT43,S100A6,CXCL9,SCG5,TTC39A,FSCN1,GADD45B,GNB3,HEY1,ISCU,SYNGR2,TP53INP2,CLU,IGFBP3,CSTB,HTRA1,IRF6,GALNT18,PLD4
Coexpression	M4528	Genes up-regulated in comparison of naive CD4 [GeneID=920] T cells versus stimulated CD4 [GeneID=920] Th2 cells at 48 h.	MSigDB C7: Immunologic Signatures (v6.0)	7.399e-05	0.7869	0.007178	0.0707	20	200	TCEAL4,RPS6,FAU,PABPC1,LYRM9,BCL2,RPL10A,DDAH1,DHRS3,PEX16,PRMT2,ZFPL1,TMEM30B,RIPOR2,DBP,CXCR4,PLXDC1,TSC22D3,MYOZ3,TSPAN32
Coexpression	M4534	Genes up-regulated in comparison of Jurkat T cells stimulated in the presence of PD-1 versus controls.	MSigDB C7: Immunologic Signatures (v6.0)	7.399e-05	0.7869	0.007178	0.0707	20	200	RPS18,FMOD,PHLDA1,PACS1,MT2A,IFI6,NDUFA4,DYRK4,DDAH2,GABARAPL2,YPEL1,TFPT,CLIC1,GTF2H5,COX6C,COX7B,ABHD11,CERS4,CLEC2B,C1orf54
Coexpression	M3498	Genes up-regulated in comparison of unstimulated macrophage cells versus macrophage cells stimulated with LPS (TLR4 agonist) for 60 min.	MSigDB C7: Immunologic Signatures (v6.0)	7.399e-05	0.7869	0.007178	0.0707	20	200	SKA2,ARRDC3,SLC25A6,ARRDC2,SLC25A45,ATP5ME,LSM3,AP3M2,TMED4,RPUSD4,ZNF688,BOD1,MRPL57,COX8A,NDUFA11,PRKAB1,FBXL12,NT5M,GPA33,TMEM140
Coexpression	M3348	Genes up-regulated in comparison of dendritic cells (DC) before and 16 h after LPS (TLR4 agonist) stimulation.	MSigDB C7: Immunologic Signatures (v6.0)	0.0001785	1	0.01366	0.1345	19	197	RPL27A,RIN3,MAP3K3,SMIM19,SHB,ARL2,TRAPPC2L,CYB5R1,NDUFB1,SMIM4,DMAC1,PYROXD2,VPS45,UQCR10,TUFM,HOMER3,ATP5MPL,MAP2K5,TSPAN32
Coexpression	M3184	Genes up-regulated in comparison of IgD+ peripheral blood B cells versus IgD- naive tonsil B cells.	MSigDB C7: Immunologic Signatures (v6.0)	0.0001785	1	0.01366	0.1345	19	197	IER5,H2BC21,H4C8,MACROD1,TMEM134,RNF126,ARHGAP1,DYRK4,ADA2,RPL10A,SMIM27,MRPL57,UCP2,PRMT2,CCDC28A,CSTB,DBP,SNHG32,CXCR4
Coexpression	M7550	Genes up-regulated in double positive thymocytes with ELK4 [GeneID=2005] knockout: untreated versus stimulated by anti-CD3.	MSigDB C7: Immunologic Signatures (v6.0)	0.0002035	1	0.01457	0.1435	19	199	H2AC6,MGST3,FGF1,SCG5,VAT1L,RND3,ADAM19,NAP1L3,LINC00847,MLLT11,TGFB2,PKIG,TPD52L1,DHRS3,HMGCL,TP53INP2,UCHL1,GAB2,TMEM140
Coexpression	M8299	Genes down-regulated in thymocytes: double positive versus CD4 [GeneID=920] single positive.	MSigDB C7: Immunologic Signatures (v6.0)	0.0002035	1	0.01457	0.1435	19	199	MAP4,TCEAL4,TNIP1,NPM3,GHITM,FSCN1,YIF1A,NKG7,EBNA1BP2,NME1,DMC1,PCCB,HMGN2,AP2S1,CLIC1,MYL6B,MRPL40,PSMB2,PSMD8
Coexpression	M5322	Genes down-regulated in comparison of memory CD4 [GeneID=920] T cells from young donors treated with TSST at 40 h versus those from old donors treated with TSST at 40 h.	MSigDB C7: Immunologic Signatures (v6.0)	0.0002035	1	0.01457	0.1435	19	199	GATD3A,PI4K2A,ACYP2,F2R,SEC31A,MYL12A,GADD45B,LIN7B,SQSTM1,SYNGR2,DHRS3,PLEKHB1,RAB33A,CLIC1,CBY1,COX8A,PRKAB1,CSTB,TSC22D3
Coexpression	M7268	Genes up-regulated in double positive thymocytes: wildtype versus TCF3 [GeneID=6929] knockout.	MSigDB C7: Immunologic Signatures (v6.0)	0.000217	1	0.01457	0.1435	19	200	RPS8,AEBP1,GLRX3,DNPH1,FRZB,CXorf56,GADD45B,SOX15,NES,C12orf57,GADD45G,ACOT2,CBLN1,TGFB2,COX7A1,DAPK3,IRF6,BOLA3,S1PR1
[truncated: 4,072 more rows]

## Sheet: Supplementary Table 3C
Category	ID	Name	Source	p-value	q-value Bonferroni	q-value FDR B&H	q-value FDR B&Y	Hit Count in Query List	Hit Count in Genome	Hit in Query List
[truncated: 23,798 more rows]
