# Supplementary material for: Multi-omics integration identifies key upstream regulators of pathomechanisms in hypertrophic cardiomyopathy due to truncating MYBPC3 mutations
Source: Clin Epigenetics. 2021 Mar 23;13:61. doi: 10.1186/s13148-021-01043-3 (PMC7989210; doi:10.1186/s13148-021-01043-3)
Supplement: Supplementary file 12 — Additional file 12: Table S4 (A) Differentially expressed proteins between HCM and control hearts from the proteomics data. (B) Enriched GO terms and pathways by up-regulated proteins in HCM versus control hearts. (C) Enriched GO terms and pathways by down-regulated proteins in HCM versus control hearts [file 13148_2021_1043_MOESM12_ESM.xlsx]

## Sheet: Supplementary Table 4A
Protein-coding gene ID	log2(FC)	P-value	P-adj
NES	1.93694	6.63099e-32	1.84806e-28
ACTN1	1.1643	2.60623e-24	3.63178e-21
SYNPO2L	1.02806	5.80554e-22	5.39335e-19
THBS4	2.10655	1.16881e-20	8.14367e-18
HSPA2	2.65226	6.03497e-15	3.36389e-12
COL6A1	0.879418	3.62256e-12	1.26201e-09
HSPG2	0.605432	4.89453e-12	1.26932e-09
MAP4	1.00353	5.00987e-12	1.26932e-09
VCAN	2.28285	4.68363e-12	1.26932e-09
POSTN	2.38169	1.18834e-11	2.75992e-09
COL6A3	0.954463	3.10892e-11	6.61817e-09
SVIL	1.14001	3.32452e-11	6.61817e-09
PGM5	0.727007	4.3381e-11	8.06019e-09
TGM2	0.779159	5.14758e-11	8.439e-09
LTBP2	2.31783	5.03155e-11	8.439e-09
COL6A2	0.915812	1.35044e-09	2.09093e-07
BGN	1.53382	2.23738e-09	3.28188e-07
TNXB	1.41779	1.12528e-08	1.56807e-06
TGFBI	1.36085	1.2162e-08	1.61407e-06
HAPLN1	1.98851	2.59062e-08	3.13916e-06
LAMB2	0.57502	4.07733e-08	4.37058e-06
ASPN	1.77725	4.01165e-08	4.37058e-06
RTN4	1.65329	4.84178e-08	4.99779e-06
VCL	0.575181	5.76426e-08	5.7375e-06
DYNC1H1	0.500991	2.59896e-07	2.41444e-05
SYNM	0.608152	3.34305e-07	3.00551e-05
CACNA2D1	1.32062	3.85129e-07	3.35424e-05
FHL1	0.704753	5.71381e-07	4.68364e-05
CA3	1.68686	6.95019e-07	5.53434e-05
HK1	0.458572	7.79818e-07	6.03709e-05
PDLIM1	0.540368	1.41743e-06	0.000102011
POSTN	1.72178	1.4275e-06	0.000102011
SLMAP	0.588411	1.81546e-06	0.000120469
COL18A1	0.923169	1.80641e-06	0.000120469
DES	0.51642	1.96031e-06	0.000127055
SORBS2	0.484981	2.06273e-06	0.000130655
TUBB4B	0.290935	2.339e-06	0.000138494
TPM3	1.22482	2.38526e-06	0.000138494
MYO18A	1.47819	2.53492e-06	0.000139291
ABI3BP	1.65987	3.13991e-06	0.000168287
SYNPO	0.776556	8.99961e-06	0.000440034
TUBA1B	0.326796	9.95455e-06	0.000470226
LUM	0.959298	9.93706e-06	0.000470226
OXCT1	0.436423	1.81626e-05	0.000843652
PRELP	1.06081	1.98298e-05	0.000882347
DYSF	0.695695	1.99454e-05	0.000882347
MAP1A	1.44983	1.98654e-05	0.000882347
GSN	0.378158	2.17276e-05	0.00094617
DMD	0.443373	2.40322e-05	0.00103043
PLN	1.03394	3.16427e-05	0.00133619
OBSCN	0.649063	3.60988e-05	0.00145808
FBN1	0.714344	3.93117e-05	0.00156517
SYNPO2	0.624551	6.62511e-05	0.00246189
FSCN1	0.971208	6.90699e-05	0.00253287
FMOD	1.41478	7.18553e-05	0.00260079
MXRA7	0.799453	7.79803e-05	0.00271664
CILP	1.40625	7.98933e-05	0.00274892
CYB5R3	0.462204	8.5078e-05	0.00289161
COL1A1	1.21903	0.00010178	0.00341761
SLC25A5	0.613247	0.00010815	0.00354606
TLN1	0.568832	0.000113987	0.00362501
POSTN	1.33741	0.000125655	0.00389113
EFHD1	1.26446	0.000150243	0.00436173
YWHAQ	0.627661	0.000154097	0.00442751
HSP90B1	0.661816	0.000158782	0.00446996
OGN	1.01473	0.000168204	0.0046043
COL14A1	1.32122	0.000191614	0.00508597
COL4A1	0.488273	0.000229162	0.00591366
DPT	0.887662	0.000232557	0.0059462
CANX	0.566075	0.000261734	0.00651298
COL1A2	0.657183	0.000275623	0.0067979
DNAJB4	0.907204	0.000300467	0.00728174
PTGFRN	1.29154	0.000299707	0.00728174
MYH10	1.08377	0.000307343	0.00738418
DCN	0.823192	0.000328339	0.00782119
NCAM1	1.13616	0.000336477	0.00794714
PYGB	0.385238	0.000358878	0.00833494
STBD1	0.818024	0.000385418	0.00887736
MCAM	1.10472	0.000421463	0.009628
COL4A2	0.497602	0.00044969	0.0101893
FBLN5	1.04518	0.000504387	0.0113365
CSRP3	0.369535	0.000613427	0.013199
HSPA4	0.820695	0.000687282	0.0146218
ABAT	1.1565	0.000897093	0.01852
FLNC	0.461235	0.000920084	0.0187173
DDAH1	1.11547	0.00103865	0.02053
ALDH4A1	0.449752	0.00119716	0.023332
DPYSL3	0.679688	0.00131848	0.0251685
S100A6	0.794549	0.00147844	0.0276468
PPIB	0.5796	0.00157393	0.0286702
DTNA	0.640325	0.00161229	0.0291783
CASQ2	0.299666	0.00167492	0.029923
IVD	0.505971	0.00172732	0.0306628
AGRN	0.808939	0.00179126	0.0315965
UCHL1	0.933128	0.002077	0.0359541
GYS1	0.49837	0.00216212	0.0367585
GANAB	0.466635	0.00229676	0.0387944
DPM3	1.03932	0.00231104	0.0388005
LAMC1	0.303999	0.00236138	0.0392621
TINAGL1	0.549621	0.00236671	0.0392621
GATM	1.0027	0.00239351	0.0394716
ANG	1.06792	0.00246702	0.0403563
DAG1	0.543277	0.00249572	0.0404394
FAM129A	0.394209	0.00251868	0.0405755
ITGB1	0.480418	0.00255372	0.0407322
ALDH3A2	0.736806	0.00259814	0.0411421
ATP1A2	0.776843	0.0026491	0.0414344
PPP1R12C	0.837398	0.00269897	0.0415582
RAB24	1.04102	0.00299381	0.0455943
SNCA	1.0241	0.00331818	0.049988
HSPA8	0.203087	0.00346808	0.0514867
MFGE8	0.867049	0.00347309	0.0514867
MLF2	1.0236	0.00350604	0.0517002
VIM	0.300301	0.00353122	0.0517974
PRKAR1A	0.462268	0.0036644	0.0529155
MAP4	1.02615	0.00405556	0.0582621
HSPB6	0.392977	0.00410768	0.0586393
GBE1	0.44247	0.0041239	0.0586393
TTN	0.254428	0.00423974	0.0599805
FLII	1.00463	0.00475788	0.0656446
HSPB2	0.570307	0.00488518	0.0659247
CRELD1	1.00668	0.00482603	0.0659247
POSTN	0.91022	0.00485747	0.0659247
LTBP4	0.995247	0.0051022	0.0680374
SORBS1	0.342083	0.00570776	0.0744828
MYPN	0.596379	0.00577262	0.0744828
CHCHD6	0.77888	0.00589067	0.0755195
TNC	0.980269	0.0059581	0.0756949
TANGO2	0.733156	0.00615682	0.0769464
SGCE	0.961171	0.006304	0.0784341
PLEC	0.291868	0.00634076	0.0785408
SOD3	0.682537	0.00657238	0.0810497
COMT	0.559296	0.00690828	0.0837103
NID2	0.465623	0.00706066	0.0847224
CRIP2	0.363942	0.00750272	0.0889791
RRAS	0.447282	0.00771238	0.0908026
PDLIM5	0.885898	0.00785196	0.0908026
TMEM258	0.946625	0.00793982	0.0914391
OBSL1	0.895332	0.00856547	0.0978359
ARHGAP1	0.597291	0.0094126	0.105177
ABHD11	0.640971	0.00947233	0.105177
ANKRD1	0.601301	0.0096161	0.105512
DYNLT3	0.906025	0.00997039	0.108971
MYL3	0.137156	0.0101883	0.110074
XIRP2	0.728785	0.0101916	0.110074
SPON1	0.898991	0.0102294	0.110074
TUBB6	0.661084	0.011355	0.118973
COL5A1	0.84585	0.0113551	0.118973
ACTN2	0.184642	0.0115006	0.119598
MYO1C	0.423796	0.011545	0.119613
CTNNA1	0.400072	0.0123673	0.124432
JPH2	0.578963	0.0131918	0.130838
CRK	0.834603	0.0132535	0.130984
ITGA7	0.435641	0.0143151	0.139497
PRPSAP2	0.870336	0.0147176	0.142423
P4HB	0.2639	0.0147756	0.14249
GHITM	0.866807	0.0148325	0.142545
CSNK2A2	0.805117	0.0159626	0.151319
ACTR1A	0.626722	0.0167733	0.15687
TPRG1L	0.760417	0.0169613	0.157072
SFXN3	0.834777	0.0194034	0.176723
CMBL	0.422608	0.019788	0.177866
UTRN	0.806676	0.0197387	0.177866
MFAP5	0.736227	0.0203235	0.180963
CLEC3B	0.721948	0.0205942	0.18279
FBLN1	0.807164	0.0206945	0.183097
YWHAE	0.21028	0.0210716	0.185258
SEC22B	0.503674	0.0223054	0.194705
STMN1	0.807423	0.0235887	0.203228
BCAP31	0.491458	0.0238919	0.204883
NEXN	0.392292	0.0251324	0.213394
VCAN	0.706054	0.025167	0.213394
PFKP	0.257473	0.0260358	0.21922
COL3A1	0.74755	0.0266542	0.223079
KRT31	0.75171	0.027203	0.224969
PPP1CB	0.346082	0.0273764	0.225734
PRPS1	0.622045	0.0285662	0.232111
GLUD1	0.218195	0.0291074	0.232944
SERPINE2	0.652055	0.0289434	0.232944
SLC4A1	0.77625	0.0296094	0.235775
FN1	0.627273	0.029906	0.236915
COL12A1	0.633197	0.0299225	0.236915
HSPB1	0.185147	0.0302528	0.238852
RDH11	0.767823	0.0307435	0.239336
PDLIM5	0.132772	0.0310077	0.24072
MYL12A	0.578322	0.0312658	0.242049
NPPA	0.747782	0.0319761	0.246862
CSNK2A1	0.758741	0.0322414	0.248223
CDH2	0.306144	0.0326079	0.248301
TUBA4A	0.453799	0.032456	0.248301
LAMA2	0.258283	0.0330677	0.249631
SERPINH1	0.540833	0.0331409	0.249631
TPM1	0.531087	0.0330203	0.249631
SGCD	0.351117	0.0340172	0.255542
SPR	0.412329	0.0361554	0.265171
CLTC	0.208834	0.0371746	0.269806
SERINC1	0.652497	0.0371532	0.269806
SGCG	0.430185	0.0375766	0.272016
CA1	0.580524	0.0384088	0.274768
RRAS2	0.458584	0.0384497	0.274768
ATP2B4	0.593125	0.0388379	0.276125
MYH7	0.157462	0.0395839	0.279292
DPM1	0.716435	0.0395041	0.279292
TECR	0.729377	0.0398846	0.279437
TUBB2A	0.346243	0.0404032	0.280109
MFAP2	0.705314	0.0405112	0.280161
OPA1	0.279612	0.0417284	0.285557
FBLN1	0.714012	0.042058	0.285892
TMEM109	0.631809	0.0423839	0.286606
HBD	0.502405	0.0445852	0.295855
PGRMC1	0.680466	0.0445733	0.295855
NRAP	0.528381	0.0452819	0.298347
KPNB1	0.420605	0.0455251	0.299004
ST13	0.461651	0.0461804	0.300712
CLTB	0.550273	0.0475619	0.307552
SRM	0.677491	0.0364621	NA
FAM185A	-0.663316	0.049853	NA
SLC16A7	-0.643214	0.0488945	0.313984
IDH1	-0.454753	0.0482491	0.310555
FTH1	-0.306384	0.0478475	0.308683
ASAH1	-0.280022	0.0464002	0.300738
PRDX5	-0.271343	0.0462954	0.300738
SDHA	-0.209836	0.0460048	0.30027
NUDT2	-0.666092	0.0458174	0.299749
GSTM1	-0.711907	0.0455963	0.299004
SERPINF2	-0.71573	0.0451242	0.298012
GAMT	-0.688065	0.0449749	0.297732
ALDH2	-0.172636	0.0438337	0.292259
MAOB	-0.210993	0.0434134	0.290152
PTCD3	-0.698629	0.0433745	0.290152
SDHC	-0.475537	0.0430485	0.289099
ACADVL	-0.189872	0.0428131	0.288213
NDUFA13	-0.234234	0.0424716	0.286606
SOD1	-0.259721	0.042179	0.286017
NOSTRIN	-0.624907	0.0420132	0.285892
ALDH5A1	-0.362695	0.0418038	0.285557
PABPC1	-0.721502	0.0416106	0.285557
ATP5B	-0.137206	0.0413427	0.284499
NDUFS5	-0.276577	0.0408791	0.282005
C5	-0.635711	0.0403788	0.280109
ANKRD2	-0.666467	0.0401058	0.279437
PDK4	-0.607585	0.0400723	0.279437
MUT	-0.421514	0.0399586	0.279437
S100A1	-0.570512	0.0397138	0.279437
TPP1	-0.446231	0.0394547	0.279292
NDUFA8	-0.271483	0.0387974	0.276125
LARS	-0.710928	0.0381749	0.27421
STXBP3	-0.739863	0.03803	0.273875
ADSSL1	-0.556638	0.0379707	0.273875
LGALS3BP	-0.545837	0.0365829	0.266902
SUCLG1	-0.265961	0.0363538	0.265926
F2	-0.619501	0.0360955	0.265171
ACAT1	-0.165169	0.0356277	0.262684
SLC25A24	-0.580019	0.0352935	0.26091
EPM2AIP1	-0.745962	0.0352757	0.26091
ATP6V1A	-0.647701	0.0349816	0.259983
SLC9A3R2	-0.711054	0.0348423	0.25964
MRPL28	-0.725327	0.0348152	0.25964
C6	-0.695516	0.0341843	NA
ACAA2	-0.234687	0.0341668	0.255976
COX7A1	-0.453195	0.0329993	0.249631
EZR	-0.387894	0.0325344	0.248301
PERM1	-0.753055	0.0324946	0.248301
FABP3	-0.179896	0.0307384	0.239336
NDUFB7	-0.260831	0.0306139	0.239336
HPCAL1	-0.772473	0.0305916	0.239336
MRPS7	-0.59064	0.030403	0.239336
RPL6	-0.762573	0.0291703	0.232944
SPHKAP	-0.746086	0.0291679	0.232944
RCSD1	-0.767691	0.0290997	0.232944
TXN2	-0.660368	0.0290108	0.232944
EHD2	-0.274763	0.028191	0.229732
SAA4	-0.784275	0.0279972	0.228821
STAT3	-0.784792	0.0279193	0.228821
MLIP	-0.321298	0.0275441	0.226447
VPS4A	-0.71361	0.0274628	NA
COX5B	-0.242336	0.0271608	0.224969
MAPKAPK3	-0.724762	0.0269057	0.22384
NDUFA7	-0.22937	0.0268543	0.22384
IGHA1	-0.66694	0.0262921	0.220711
SUCLG2	-0.220639	0.0257276	0.217281
NDUFS8	-0.288815	0.0251907	0.213394
OPTN	-0.687472	0.0249781	NA
MYBPC3	-0.229645	0.0241563	0.206514
SF3B2	-0.782251	0.0236261	0.203228
MCCC2	-0.295353	0.0229112	0.198303
CLGN	-0.808838	0.0225397	0.195695
CKMT2	-0.207472	0.0223558	0.194705
COX5A	-0.301931	0.0215549	0.18891
KLHL31	-0.713984	0.0213167	NA
S100B	-0.713982	0.0213085	NA
NDUFB6	-0.382192	0.0208371	0.183775
SERPING1	-0.778109	0.0200816	0.179383
EPHX2	-0.742948	0.019848	0.177866
NAPRT	-0.816573	0.0197516	0.177866
CNDP2	-0.482093	0.0197125	0.177866
CST1	-0.701381	0.0193376	0.176701
TPPP	-0.830943	0.0191159	0.17525
CRAT	-0.38941	0.0179789	0.16537
NDUFB5	-0.475299	0.0172116	0.158837
HSPA12B	-0.839467	0.016964	0.157072
PROB1	-0.853822	0.0168301	0.156875
ME3	-0.828589	0.0167003	0.156713
NUDT6	-0.853758	0.016615	0.15644
NUDT4	-0.695437	0.016018	0.15133
ALDOC	-0.302727	0.0154707	0.147156
LTA4H	-0.488591	0.015331	0.146327
EML1	-0.865379	0.015253	0.146083
SARS2	-0.625658	0.0143675	0.13952
RBP7	-0.838376	0.0141123	0.138004
RRAGD	-0.85688	0.0139153	0.136556
APEH	-0.777914	0.0135146	0.133093
GC	-0.460426	0.0128841	0.128243
AASS	-0.773247	0.0127909	0.127772
ALDH9A1	-0.374877	0.012603	0.126348
LSS	-0.888393	0.0121462	0.12265
ATP2A2	-0.353968	0.0121289	0.12265
SLC25A4	-0.168179	0.0121106	0.12265
SAT2	-0.811792	0.012008	0.122587
EPB41L2	-0.895099	0.0118061	0.12097
HMGCL	-0.69138	0.0117999	0.12097
IDH2	-0.24124	0.0116909	0.120676
HP	-0.831823	0.0115002	0.119598
PTRHD1	-0.769325	0.0112252	0.118503
UQCC3	-0.907707	0.0108834	0.115331
NHLRC2	-0.582644	0.0107978	0.11486
MFN1	-0.856713	0.0105303	0.112444
MTIF2	-0.877354	0.0105186	0.112444
PSME1	-0.505084	0.0101953	0.110074
FABP5	-0.293119	0.00959085	0.105512
GOT1	-0.247552	0.00959044	0.105512
EHHADH	-0.80438	0.00943613	0.105177
ECH1	-0.352091	0.00899808	0.10112
RRAGA	-0.93387	0.00893279	0.100792
MPI	-0.825496	0.0087476	0.0991039
CA4	-0.630702	0.00868436	0.098789
RABGGTA	-0.898749	0.00841135	0.0964709
TNS1	-0.392622	0.00784826	0.0908026
SUN1	-0.936889	0.00784603	0.0908026
FKBP4	-0.950136	0.00782177	0.0908026
ACAD9	-0.6736	0.0077943	0.0908026
ATP5A1	-0.174388	0.00725592	0.0864199
LDB3	-0.691949	0.007083	0.0847224
SRL	-0.306116	0.00705942	0.0847224
ORM2	-0.868732	0.00678346	0.0825568
EPB41	-0.958937	0.0066861	0.0817288
TST	-0.504069	0.00665402	0.081695
EPRS	-0.73668	0.00611744	0.0767987
UQCR10	-0.548848	0.00605122	0.0763111
MCCC1	-0.449757	0.00597519	0.0756949
COQ8A	-0.447312	0.00590716	0.0755195
SSBP1	-0.548116	0.00575479	0.0744828
PKM	-0.496429	0.00572162	0.0744828
GPS1	-0.956654	0.00564594	0.0742229
DECR1	-0.234627	0.00528141	0.0697596
ATP5J	-0.5566	0.00520787	0.0691159
ATIC	-0.615778	0.00493234	0.0660886
BCO2	-0.906682	0.00489645	0.0659247
NPEPPS	-0.469751	0.00483243	0.0659247
TACC2	-0.986524	0.00467091	0.0647653
SMTN	-0.97854	0.00453708	0.0632243
TRAP1	-0.519701	0.00453085	0.0632243
NDUFA5	-0.417701	0.00428345	0.0602929
PALLD	-0.789263	0.00360662	0.0523524
MYLK3	-0.747813	0.00357307	0.0521369
CP	-0.755641	0.00340725	0.0510538
NDUFV1	-0.315411	0.00319436	0.0483841
HIBADH	-0.448208	0.00287714	0.0440581
NDUFS1	-0.25263	0.00268611	0.0415582
ETFDH	-0.302315	0.0026612	0.0414344
CTSB	-0.651771	0.00262755	0.0413727
MT-CO2	-0.315736	0.00255764	0.0407322
FGF12	-1.07927	0.00247611	0.0403563
SAMHD1	-1.05049	0.00216304	0.0367585
SUCLA2	-0.346077	0.00210466	0.036208
FHL2	-0.411783	0.00194959	0.0339594
ACSL1	-0.308722	0.00189966	0.0332979
DBI	-0.486161	0.00165904	0.0298306
PRUNE1	-1.1245	0.00155285	0.0284723
MYH4	-1.0762	0.00153884	0.0284023
PDE3A	-1.06443	0.00148799	0.0276468
NDUFA9	-0.384614	0.0014263	0.0268588
ITIH4	-1.10244	0.00137745	0.0261153
GPD2	-1.02082	0.0012673	0.0243584
LDHB	-0.35889	0.00123822	0.0239647
ALDH1A1	-0.960674	0.00111099	0.0218052
ACSS2	-1.16932	0.00101729	0.0202514
GSTM2	-0.481225	0.000973388	0.0195168
ADH1B	-0.88029	0.000953466	0.0192559
LACTB	-0.85583	0.000906418	0.0185749
CTSD	-0.368006	0.000879287	0.0182878
HINT1	-0.708004	0.000848972	0.0177901
NACA	-0.526169	0.000710223	0.0149954
LDHA	-0.474108	0.000615669	0.013199
NDUFS2	-0.326321	0.000609337	0.013199
HADHA	-0.267704	0.000584198	0.0128201
EPDR1	-0.932247	0.000567781	0.0125588
CMA1	-0.981782	0.000548785	0.0122357
PKM	-0.257672	0.000358583	0.00833494
CKB	-0.525716	0.000258558	0.00649189
GPD1L	-0.526757	0.000250585	0.00634891
ALDH7A1	-0.602562	0.000206237	0.0053718
GPT	-1.03453	0.000194623	0.00511711
CKM	-0.386663	0.000175201	0.00469504
PYGM	-0.924939	0.000172379	0.00466429
PTER	-1.34068	0.00016851	0.0046043
AAMDC	-0.736419	0.00016533	0.0046043
ACSS1	-0.714049	0.000156899	0.00446201
WARS	-0.724007	0.000147169	0.00431747
OPLAH	-1.10523	0.00014364	0.00425876
PALLD	-1.35264	0.000139999	0.00419545
ALDOA	-0.334043	0.000139046	0.00419545
CPA3	-1.27024	0.000128531	0.00393644
ACSF2	-1.24394	0.000120646	0.00377797
ORM1	-0.871287	0.00011446	0.00362501
PCCB	-0.671628	0.000112662	0.00362501
COL28A1	-1.31401	0.000106209	0.00352386
GPI	-0.339786	7.524e-05	0.00265435
SAA2	-1.35838	7.39505e-05	0.00264231
SERPINA3	-0.739351	6.5819e-05	0.00246189
ACSS3	-1.38292	4.85516e-05	0.00185361
ART3	-1.37163	4.70001e-05	0.0018193
HSD17B4	-0.747082	4.04706e-05	0.00158861
MB	-0.310573	3.51347e-05	0.00144001
CHDH	-1.443	3.35793e-05	0.0013968
PPP1R13L	-1.62448	4.86176e-06	0.000241959
NAMPT	-1.15226	4.81102e-06	0.000241959
PCCA	-0.717883	3.42192e-06	0.000176609
HSDL2	-0.500251	3.2155e-06	0.000169087
ARMT1	-1.6656	2.54892e-06	0.000139291
PFKM	-0.42921	2.52376e-06	0.000139291
PGAM2	-0.504779	2.28437e-06	0.000138403
SIAE	-1.433	2.15486e-06	0.000133458
GPD1	-1.68747	1.74788e-06	0.000120469
SERPINA1	-0.792327	1.0913e-06	8.22018e-05
MYH6	-1.00906	5.41918e-07	4.57674e-05
PRDX6	-0.561366	1.93638e-07	1.86093e-05
LRG1	-1.89862	3.73304e-08	4.335e-06
CRP	-1.99312	2.01515e-08	2.55283e-06
SELENBP1	-1.77743	9.84945e-15	3.92149e-12
SAA1	-2.74005	9.18979e-15	3.92149e-12

## Sheet: Supplementary Table 4B
ID term	term description	observed gene count	background gene count	false discovery rate	matching proteins in your network (IDs)	matching proteins in your network (labels)
GO:0030198	extracellular matrix organization	40	296	6.16e-27	ENSP00000052754,ENSP00000216286,ENSP00000225964,ENSP00000258341,ENSP00000265077,ENSP00000265131,ENSP00000266718,ENSP00000274341,ENSP00000284322,ENSP00000295550,ENSP00000297268,ENSP00000297848,ENSP00000300527,ENSP00000304408,ENSP00000325146,ENSP00000325527,ENSP00000327336,ENSP00000331544,ENSP00000345008,ENSP00000346839,ENSP00000347041,ENSP00000347665,ENSP00000352455,ENSP00000353654,ENSP00000355180…	ABI3BP,AGRN,BGN,COL12A1,COL14A1,COL18A1,COL1A1,COL1A2,COL3A1,COL4A1,COL4A2,COL5A1,COL6A1,COL6A2,COL6A3,DAG1,DCN,DPT,FBLN1,FBLN5,FBN1,FMOD,FN1,HAPLN1,HSPG2,ITGA7,ITGB1,LAMA2,LAMB2,LAMC1,LUM,MFAP2,MFAP5,NID2,POSTN,SERPINH1,TGFBI,TNC,TNXB,VCAN
GO:0043062	extracellular structure organization	41	339	2.83e-26	ENSP00000052754,ENSP00000216286,ENSP00000225964,ENSP00000258341,ENSP00000265077,ENSP00000265131,ENSP00000266718,ENSP00000274341,ENSP00000284322,ENSP00000295550,ENSP00000297268,ENSP00000297848,ENSP00000300527,ENSP00000304408,ENSP00000325146,ENSP00000325527,ENSP00000327336,ENSP00000327801,ENSP00000331544,ENSP00000345008,ENSP00000346839,ENSP00000347041,ENSP00000347665,ENSP00000352455,ENSP00000353654…	ABI3BP,AGRN,BGN,COL12A1,COL14A1,COL18A1,COL1A1,COL1A2,COL3A1,COL4A1,COL4A2,COL5A1,COL6A1,COL6A2,COL6A3,DAG1,DCN,DPT,FBLN1,FBLN5,FBN1,FMOD,FN1,HAPLN1,HSPG2,ITGA7,ITGB1,LAMA2,LAMB2,LAMC1,LUM,MFAP2,MFAP5,NID2,P4HB,POSTN,SERPINH1,TGFBI,TNC,TNXB,VCAN
GO:0097435	supramolecular fiber organization	42	383	1.29e-25	ENSP00000225964,ENSP00000261448,ENSP00000261978,ENSP00000266718,ENSP00000290158,ENSP00000297268,ENSP00000297848,ENSP00000299767,ENSP00000304408,ENSP00000304669,ENSP00000325146,ENSP00000336762,ENSP00000338345,ENSP00000343690,ENSP00000345008,ENSP00000347041,ENSP00000347852,ENSP00000348965,ENSP00000351022,ENSP00000351790,ENSP00000352455,ENSP00000353590,ENSP00000356791,ENSP00000357516,ENSP00000360293…	ACTN1,ACTN2,ANG,ANKRD1,CASQ2,COL12A1,COL14A1,COL1A1,COL1A2,COL3A1,COL5A1,CSRP3,CTNNA1,DES,DPT,DPYSL3,DYNC1H1,FBLN5,FMOD,FSCN1,GSN,HSP90B1,ITGB1,KPNB1,LTBP2,LUM,MFAP5,MYH10,MYPN,OBSCN,OBSL1,PRKAR1A,SERPINH1,SNCA,SORBS1,SORBS2,STMN1,TNXB,TPM1,TPM3,TTN,VIM
GO:0016043	cellular component organization	121	5163	1.32e-18	ENSP00000052754,ENSP00000211998,ENSP00000216218,ENSP00000216286,ENSP00000218867,ENSP00000225964,ENSP00000248437,ENSP00000251645,ENSP00000258341,ENSP00000261448,ENSP00000261978,ENSP00000262551,ENSP00000264059,ENSP00000264335,ENSP00000265077,ENSP00000265131,ENSP00000266718,ENSP00000268150,ENSP00000269141,ENSP00000274341,ENSP00000284322,ENSP00000284440,ENSP00000290158,ENSP00000290913,ENSP00000295550…	ABI3BP,ACTN1,ACTN2,ACTR1A,AGRN,ANG,ANKRD1,BGN,CASQ2,CDH2,CHCHD6,CLTB,CLTC,COL12A1,COL14A1,COL18A1,COL1A1,COL1A2,COL3A1,COL4A1,COL4A2,COL5A1,COL6A1,COL6A2,COL6A3,CRK,CSRP3,CTNNA1,DAG1,DCN,DES,DMD,DPT,DPYSL3,DYNC1H1,DYSF,EFHD1,FBLN1,FBLN5,FBN1,FLII,FLNC,FMOD,FN1,FSCN1,GSN,HAPLN1,HSP90B1,HSPA2,HSPA4,HSPA8,HSPG2,ITGA7,ITGB1,KPNB1,KRT31,LAMA2,LAMB2,LAMC1,LTBP2,LUM,MAP1A,MAP4,MFAP2,MFAP5,MFGE8,MYH10,MY…
GO:0071840	cellular component organization or biogenesis	122	5342	5.79e-18	ENSP00000052754,ENSP00000211998,ENSP00000216218,ENSP00000216286,ENSP00000218867,ENSP00000225964,ENSP00000248437,ENSP00000251645,ENSP00000258341,ENSP00000261448,ENSP00000261978,ENSP00000262551,ENSP00000264059,ENSP00000264335,ENSP00000265077,ENSP00000265131,ENSP00000266718,ENSP00000268150,ENSP00000269141,ENSP00000274341,ENSP00000284322,ENSP00000284440,ENSP00000290158,ENSP00000290913,ENSP00000295550…	ABI3BP,ACTN1,ACTN2,ACTR1A,AGRN,ANG,ANKRD1,BGN,CASQ2,CDH2,CHCHD6,CLTB,CLTC,COL12A1,COL14A1,COL18A1,COL1A1,COL1A2,COL3A1,COL4A1,COL4A2,COL5A1,COL6A1,COL6A2,COL6A3,CRK,CSRP3,CTNNA1,DAG1,DCN,DES,DMD,DPT,DPYSL3,DYNC1H1,DYSF,EFHD1,FBLN1,FBLN5,FBN1,FLII,FLNC,FMOD,FN1,FSCN1,GSN,HAPLN1,HSP90B1,HSPA2,HSPA4,HSPA8,HSPG2,ITGA7,ITGB1,KPNB1,KRT31,LAMA2,LAMB2,LAMC1,LTBP2,LUM,MAP1A,MAP4,MFAP2,MFAP5,MFGE8,MYH10,MY…
GO:0003012	muscle system process	30	291	3.85e-17	ENSP00000211998,ENSP00000217652,ENSP00000261448,ENSP00000295951,ENSP00000316029,ENSP00000336775,ENSP00000347507,ENSP00000347852,ENSP00000349320,ENSP00000350132,ENSP00000351022,ENSP00000354490,ENSP00000354923,ENSP00000356515,ENSP00000357516,ENSP00000360293,ENSP00000362924,ENSP00000363071,ENSP00000365663,ENSP00000379210,ENSP00000379895,ENSP00000385636,ENSP00000386881,ENSP00000398930,ENSP00000431813…	ACTN2,ATP1A2,CACNA2D1,CASQ2,CSRP3,DES,DMD,DTNA,DYSF,GATM,GSN,MYH7,MYL12A,MYL3,NPPA,OBSL1,PDLIM5,PLN,SGCE,SLMAP,SORBS1,SORBS2,SYNM,TLN1,TPM1,TPM3,TTN,UTRN,VCL,VIM
GO:0061061	muscle structure development	34	457	1.19e-15	ENSP00000052754,ENSP00000218867,ENSP00000261448,ENSP00000269141,ENSP00000284440,ENSP00000295550,ENSP00000304408,ENSP00000327145,ENSP00000333938,ENSP00000338343,ENSP00000347507,ENSP00000347852,ENSP00000348128,ENSP00000351022,ENSP00000351790,ENSP00000353590,ENSP00000354923,ENSP00000356515,ENSP00000360762,ENSP00000365663,ENSP00000376475,ENSP00000377710,ENSP00000379210,ENSP00000379350,ENSP00000385636…	ACTN2,ANKRD1,CASQ2,CDH2,COL3A1,COL6A3,CSRP3,DCN,DMD,FHL1,FLNC,ITGA7,ITGB1,LAMA2,MYH10,MYH7,MYL3,MYPN,NEXN,NPPA,OBSCN,OBSL1,PDLIM5,PRKAR1A,SGCD,SGCE,SGCG,SORBS2,SVIL,TPM1,TTN,UCHL1,UTRN,XIRP2
GO:0030029	actin filament-based process	34	493	9.12e-15	ENSP00000261448,ENSP00000299767,ENSP00000304669,ENSP00000316029,ENSP00000324573,ENSP00000336762,ENSP00000343690,ENSP00000347507,ENSP00000347852,ENSP00000349320,ENSP00000351022,ENSP00000351790,ENSP00000352834,ENSP00000353590,ENSP00000354923,ENSP00000357516,ENSP00000360293,ENSP00000360762,ENSP00000362924,ENSP00000363071,ENSP00000371798,ENSP00000376475,ENSP00000377941,ENSP00000379210,ENSP00000379350…	ACTN1,ACTN2,ANG,ANKRD1,CACNA2D1,CASQ2,CSRP3,CTNNA1,DES,DMD,DPYSL3,FLII,FSCN1,GSN,HSP90B1,ITGB1,MYH10,MYH7,MYL3,MYO18A,MYO1C,MYPN,OBSCN,OBSL1,PRKAR1A,SORBS1,SORBS2,TLN1,TNXB,TPM1,TPM3,TTN,VIM,XIRP2
GO:0055001	muscle cell development	21	137	9.12e-15	ENSP00000218867,ENSP00000261448,ENSP00000284440,ENSP00000327145,ENSP00000333938,ENSP00000338343,ENSP00000347852,ENSP00000351022,ENSP00000351790,ENSP00000353590,ENSP00000354923,ENSP00000360762,ENSP00000365663,ENSP00000376475,ENSP00000379350,ENSP00000385636,ENSP00000431813,ENSP00000443495,ENSP00000455507,ENSP00000467141,ENSP00000480359	ACTN2,ANKRD1,CASQ2,CSRP3,DMD,FLNC,ITGB1,MYH10,MYPN,NEXN,NPPA,OBSCN,OBSL1,PDLIM5,PRKAR1A,SGCD,SGCG,SORBS2,TPM1,TTN,UCHL1
GO:0007010	cytoskeleton organization	45	953	2.59e-14	ENSP00000248437,ENSP00000251645,ENSP00000261448,ENSP00000290158,ENSP00000299767,ENSP00000300231,ENSP00000304669,ENSP00000316029,ENSP00000318697,ENSP00000324573,ENSP00000336762,ENSP00000336775,ENSP00000336799,ENSP00000341289,ENSP00000343690,ENSP00000347852,ENSP00000348128,ENSP00000348965,ENSP00000351022,ENSP00000351790,ENSP00000353375,ENSP00000353590,ENSP00000354923,ENSP00000357516,ENSP00000360293…	ACTN1,ACTN2,AGRN,ANG,ANKRD1,CASQ2,CSRP3,CTNNA1,DAG1,DES,DMD,DPYSL3,DYNC1H1,FLII,FSCN1,GSN,HSP90B1,ITGB1,KPNB1,KRT31,MAP1A,MAP4,MYH10,MYO18A,MYPN,OBSCN,OBSL1,PRKAR1A,SORBS1,SORBS2,STMN1,SVIL,SYNM,TLN1,TNXB,TPM1,TPM3,TTN,TUBA1B,TUBA4A,TUBB2A,TUBB4B,TUBB6,VIM,XIRP2
GO:0055002	striated muscle cell development	19	121	1.76e-13	ENSP00000261448,ENSP00000284440,ENSP00000327145,ENSP00000333938,ENSP00000347852,ENSP00000351022,ENSP00000351790,ENSP00000353590,ENSP00000354923,ENSP00000360762,ENSP00000365663,ENSP00000376475,ENSP00000379350,ENSP00000385636,ENSP00000431813,ENSP00000443495,ENSP00000455507,ENSP00000467141,ENSP00000480359	ACTN2,ANKRD1,CASQ2,CSRP3,DMD,FLNC,ITGB1,MYH10,MYPN,NEXN,NPPA,OBSCN,OBSL1,PDLIM5,PRKAR1A,SORBS2,TPM1,TTN,UCHL1
GO:0072359	circulatory system development	40	807	3.22e-13	ENSP00000196371,ENSP00000218867,ENSP00000225964,ENSP00000264036,ENSP00000268150,ENSP00000269141,ENSP00000297268,ENSP00000304408,ENSP00000317904,ENSP00000321856,ENSP00000325527,ENSP00000333938,ENSP00000336762,ENSP00000337838,ENSP00000338343,ENSP00000346839,ENSP00000347507,ENSP00000347665,ENSP00000347852,ENSP00000350132,ENSP00000351022,ENSP00000351790,ENSP00000353590,ENSP00000353654,ENSP00000360762…	ACTN2,ANG,ANKRD1,CDH2,COL18A1,COL1A1,COL1A2,COL3A1,COL4A1,COL4A2,COL5A1,CRELD1,CSRP3,DAG1,FBN1,FN1,GYS1,HSPG2,ITGB1,MCAM,MFGE8,MYH10,MYH7,MYL3,MYPN,NEXN,NPPA,OBSL1,OXCT1,PDLIM5,PLN,PRKAR1A,RTN4,SGCD,SGCG,SORBS2,TGFBI,TPM1,TTN,XIRP2
GO:0048738	cardiac muscle tissue development	20	154	6.62e-13	ENSP00000218867,ENSP00000333938,ENSP00000338343,ENSP00000347507,ENSP00000347852,ENSP00000350132,ENSP00000351022,ENSP00000351790,ENSP00000353590,ENSP00000360762,ENSP00000365663,ENSP00000376475,ENSP00000379210,ENSP00000379350,ENSP00000385636,ENSP00000386840,ENSP00000431813,ENSP00000443495,ENSP00000467141,ENSP00000480359	ACTN2,ANKRD1,CSRP3,ITGB1,MYH10,MYH7,MYL3,MYPN,NEXN,NPPA,OBSL1,PDLIM5,PLN,PRKAR1A,SGCD,SGCG,SORBS2,TPM1,TTN,XIRP2
GO:0007155	cell adhesion	40	843	1.11e-12	ENSP00000211998,ENSP00000216286,ENSP00000258341,ENSP00000264036,ENSP00000265077,ENSP00000265131,ENSP00000268150,ENSP00000269141,ENSP00000271064,ENSP00000274341,ENSP00000295550,ENSP00000297848,ENSP00000300527,ENSP00000304408,ENSP00000304669,ENSP00000325146,ENSP00000325527,ENSP00000339730,ENSP00000345008,ENSP00000346839,ENSP00000347665,ENSP00000353590,ENSP00000355180,ENSP00000356791,ENSP00000360293…	ACTN1,ACTN2,CDH2,COL12A1,COL14A1,COL18A1,COL3A1,COL5A1,COL6A1,COL6A2,COL6A3,CTNNA1,DAG1,DPT,FBLN5,FBN1,FN1,HAPLN1,ITGA7,ITGB1,LAMA2,LAMB2,LAMC1,MCAM,MFGE8,MYH10,NCAM1,NID2,PGM5,POSTN,SGCE,SORBS1,SPON1,TGFBI,THBS4,TINAGL1,TNC,TNXB,VCAN,VCL
GO:0006936	muscle contraction	23	244	2.27e-12	ENSP00000211998,ENSP00000217652,ENSP00000261448,ENSP00000295951,ENSP00000316029,ENSP00000336775,ENSP00000347507,ENSP00000349320,ENSP00000351022,ENSP00000354490,ENSP00000354923,ENSP00000356515,ENSP00000357516,ENSP00000360293,ENSP00000363071,ENSP00000379210,ENSP00000385636,ENSP00000386881,ENSP00000431813,ENSP00000443495,ENSP00000446007,ENSP00000467141,ENSP00000470152	ACTN2,ATP1A2,CACNA2D1,CASQ2,CSRP3,DES,DMD,DTNA,DYSF,MYH7,MYL12A,MYL3,OBSL1,SLMAP,SORBS1,SYNM,TLN1,TPM1,TPM3,TTN,UTRN,VCL,VIM
GO:0032501	multicellular organismal process	124	6507	3.15e-12	ENSP00000052754,ENSP00000196371,ENSP00000211998,ENSP00000217652,ENSP00000218867,ENSP00000225964,ENSP00000246792,ENSP00000251645,ENSP00000261448,ENSP00000262506,ENSP00000262551,ENSP00000264036,ENSP00000264059,ENSP00000264335,ENSP00000265077,ENSP00000265131,ENSP00000266718,ENSP00000268150,ENSP00000268835,ENSP00000269141,ENSP00000274341,ENSP00000284031,ENSP00000284440,ENSP00000295550,ENSP00000295951…	ABAT,ACTN1,ACTN2,ACTR1A,AGRN,ALDH3A2,ANG,ANKRD1,ASPN,ATP1A2,ATP2B4,BCAP31,BGN,CACNA2D1,CASQ2,CDH2,CLEC3B,CLTC,COL12A1,COL18A1,COL1A1,COL1A2,COL3A1,COL4A1,COL4A2,COL5A1,COL6A1,COL6A3,COMT,CRELD1,CRIP2,CSNK2A2,CSRP3,CTNNA1,CYB5R3,DAG1,DCN,DDAH1,DES,DMD,DPYSL3,DTNA,DYSF,EFHD1,FBLN1,FBN1,FHL1,FLII,FN1,GATM,GSN,GYS1,HAPLN1,HBD,HSPA2,HSPG2,ITGA7,ITGB1,KRT31,LAMA2,LAMB2,LTBP4,LUM,MAP1A,MAP4,MCAM,MFAP2,M…
GO:0042692	muscle cell differentiation	22	230	6.01e-12	ENSP00000218867,ENSP00000261448,ENSP00000269141,ENSP00000284440,ENSP00000327145,ENSP00000333938,ENSP00000338343,ENSP00000347852,ENSP00000351022,ENSP00000351790,ENSP00000353590,ENSP00000354923,ENSP00000360762,ENSP00000365663,ENSP00000376475,ENSP00000379350,ENSP00000385636,ENSP00000431813,ENSP00000443495,ENSP00000455507,ENSP00000467141,ENSP00000480359	ACTN2,ANKRD1,CASQ2,CDH2,CSRP3,DMD,FLNC,ITGB1,MYH10,MYPN,NEXN,NPPA,OBSCN,OBSL1,PDLIM5,PRKAR1A,SGCD,SGCG,SORBS2,TPM1,TTN,UCHL1
GO:0051146	striated muscle cell differentiation	20	182	8.14e-12	ENSP00000261448,ENSP00000269141,ENSP00000284440,ENSP00000327145,ENSP00000333938,ENSP00000347852,ENSP00000351022,ENSP00000351790,ENSP00000353590,ENSP00000354923,ENSP00000360762,ENSP00000365663,ENSP00000376475,ENSP00000379350,ENSP00000385636,ENSP00000431813,ENSP00000443495,ENSP00000455507,ENSP00000467141,ENSP00000480359	ACTN2,ANKRD1,CASQ2,CDH2,CSRP3,DMD,FLNC,ITGB1,MYH10,MYPN,NEXN,NPPA,OBSCN,OBSL1,PDLIM5,PRKAR1A,SORBS2,TPM1,TTN,UCHL1
GO:0060537	muscle tissue development	23	284	3.57e-11	ENSP00000052754,ENSP00000218867,ENSP00000304408,ENSP00000333938,ENSP00000338343,ENSP00000347507,ENSP00000347852,ENSP00000348128,ENSP00000350132,ENSP00000351022,ENSP00000351790,ENSP00000353590,ENSP00000360762,ENSP00000365663,ENSP00000376475,ENSP00000379210,ENSP00000379350,ENSP00000385636,ENSP00000386840,ENSP00000431813,ENSP00000443495,ENSP00000467141,ENSP00000480359	ACTN2,ANKRD1,COL3A1,CSRP3,DCN,ITGB1,MYH10,MYH7,MYL3,MYPN,NEXN,NPPA,OBSL1,PDLIM5,PLN,PRKAR1A,SGCD,SGCG,SORBS2,SVIL,TPM1,TTN,XIRP2
GO:0009888	tissue development	53	1626	3.94e-11	ENSP00000052754,ENSP00000196371,ENSP00000211998,ENSP00000218867,ENSP00000225964,ENSP00000251645,ENSP00000258341,ENSP00000265131,ENSP00000266718,ENSP00000269141,ENSP00000296130,ENSP00000304408,ENSP00000321856,ENSP00000325146,ENSP00000333938,ENSP00000337838,ENSP00000338343,ENSP00000345774,ENSP00000346839,ENSP00000347507,ENSP00000347665,ENSP00000347852,ENSP00000348128,ENSP00000350132,ENSP00000351022…	ACTN2,ALDH3A2,ANKRD1,ASPN,CDH2,CLEC3B,COL12A1,COL18A1,COL1A1,COL3A1,COL4A1,COL4A2,COL5A1,COL6A1,CRELD1,CSRP3,DAG1,DCN,FN1,GSN,ITGA7,ITGB1,KRT31,LAMB2,LAMC1,LUM,MYH10,MYH7,MYL3,MYPN,NEXN,NPPA,OBSL1,OXCT1,PDLIM5,PLN,POSTN,PRKAR1A,RTN4,SERPINE2,SERPINH1,SGCD,SGCG,SORBS2,SVIL,TGFBI,TGM2,TNC,TPM1,TTN,VCL,VIM,XIRP2
GO:0030036	actin cytoskeleton organization	27	418	3.94e-11	ENSP00000261448,ENSP00000299767,ENSP00000304669,ENSP00000316029,ENSP00000324573,ENSP00000336762,ENSP00000343690,ENSP00000347852,ENSP00000351022,ENSP00000351790,ENSP00000353590,ENSP00000357516,ENSP00000360293,ENSP00000360762,ENSP00000362924,ENSP00000371798,ENSP00000376475,ENSP00000377941,ENSP00000379350,ENSP00000385636,ENSP00000386840,ENSP00000407685,ENSP00000431813,ENSP00000437073,ENSP00000443495…	ACTN1,ACTN2,ANG,ANKRD1,CASQ2,CSRP3,CTNNA1,DPYSL3,FLII,FSCN1,GSN,HSP90B1,ITGB1,MYH10,MYO18A,MYPN,OBSCN,OBSL1,PRKAR1A,SORBS1,SORBS2,TLN1,TNXB,TPM1,TPM3,TTN,XIRP2
GO:0048731	system development	91	4144	7.39e-11	ENSP00000052754,ENSP00000196371,ENSP00000211998,ENSP00000218867,ENSP00000225964,ENSP00000246792,ENSP00000251645,ENSP00000262506,ENSP00000262551,ENSP00000264036,ENSP00000264059,ENSP00000264335,ENSP00000265077,ENSP00000265131,ENSP00000266718,ENSP00000268150,ENSP00000268835,ENSP00000269141,ENSP00000274341,ENSP00000284440,ENSP00000295550,ENSP00000296130,ENSP00000297268,ENSP00000300026,ENSP00000304408…	ABAT,ACTN1,ACTN2,AGRN,ALDH3A2,ANG,ANKRD1,ASPN,ATP2B4,CDH2,CLEC3B,COL12A1,COL18A1,COL1A1,COL1A2,COL3A1,COL4A1,COL4A2,COL5A1,COL6A3,CRELD1,CRIP2,CSNK2A2,CSRP3,CTNNA1,DAG1,DCN,DMD,DPYSL3,EFHD1,FBN1,FHL1,FN1,GSN,GYS1,HAPLN1,HSPG2,ITGA7,ITGB1,KRT31,LAMA2,LAMB2,LUM,MAP4,MCAM,MFAP2,MFAP5,MFGE8,MYH10,MYH7,MYL3,MYPN,NCAM1,NES,NEXN,NPPA,OBSL1,OGN,OPA1,OXCT1,PDLIM5,PLN,POSTN,PPIB,PRELP,PRKAR1A,PRPS1,PRPSAP2…
GO:0014706	striated muscle tissue development	22	271	9.76e-11	ENSP00000052754,ENSP00000218867,ENSP00000333938,ENSP00000338343,ENSP00000347507,ENSP00000347852,ENSP00000348128,ENSP00000350132,ENSP00000351022,ENSP00000351790,ENSP00000353590,ENSP00000360762,ENSP00000365663,ENSP00000376475,ENSP00000379210,ENSP00000379350,ENSP00000385636,ENSP00000386840,ENSP00000431813,ENSP00000443495,ENSP00000467141,ENSP00000480359	ACTN2,ANKRD1,CSRP3,DCN,ITGB1,MYH10,MYH7,MYL3,MYPN,NEXN,NPPA,OBSL1,PDLIM5,PLN,PRKAR1A,SGCD,SGCG,SORBS2,SVIL,TPM1,TTN,XIRP2
GO:0048856	anatomical structure development	102	5085	2.65e-10	ENSP00000052754,ENSP00000196371,ENSP00000211998,ENSP00000218867,ENSP00000225964,ENSP00000246792,ENSP00000251645,ENSP00000258341,ENSP00000261448,ENSP00000262506,ENSP00000262551,ENSP00000264036,ENSP00000264059,ENSP00000264335,ENSP00000265077,ENSP00000265131,ENSP00000266718,ENSP00000268150,ENSP00000268835,ENSP00000269141,ENSP00000274341,ENSP00000284440,ENSP00000295550,ENSP00000296130,ENSP00000297268…	ABAT,ACTN1,ACTN2,AGRN,ALDH3A2,ANG,ANKRD1,ASPN,ATP2B4,CASQ2,CDH2,CLEC3B,COL12A1,COL18A1,COL1A1,COL1A2,COL3A1,COL4A1,COL4A2,COL5A1,COL6A1,COL6A3,CRELD1,CRIP2,CSNK2A2,CSRP3,CTNNA1,DAG1,DCN,DMD,DPYSL3,EFHD1,FBLN1,FBN1,FHL1,FLII,FLNC,FN1,FSCN1,GATM,GSN,GYS1,HAPLN1,HSPA2,HSPG2,ITGA7,ITGB1,KRT31,LAMA2,LAMB2,LAMC1,LTBP4,LUM,MAP4,MCAM,MFAP2,MFAP5,MFGE8,MYH10,MYH7,MYL3,MYPN,NCAM1,NES,NEXN,NPPA,OBSCN,OBSL1,…
GO:0032879	regulation of localization	66	2524	3.49e-10	ENSP00000052754,ENSP00000196371,ENSP00000211998,ENSP00000225964,ENSP00000227525,ENSP00000246792,ENSP00000248553,ENSP00000256196,ENSP00000261448,ENSP00000264036,ENSP00000264335,ENSP00000268150,ENSP00000269141,ENSP00000277865,ENSP00000295951,ENSP00000300231,ENSP00000300574,ENSP00000304408,ENSP00000304669,ENSP00000306015,ENSP00000310491,ENSP00000331544,ENSP00000333938,ENSP00000336762,ENSP00000337838…	ABAT,ACTN1,ACTN2,ANG,ANKRD1,ARHGAP1,ATP1A2,ATP2B4,BCAP31,CACNA2D1,CASQ2,CDH2,CLTC,COL18A1,COL1A1,COL3A1,COMT,CRK,CTNNA1,DAG1,DCN,DMD,DPYSL3,DYNC1H1,FBLN1,FHL1,FN1,GLUD1,GSN,HSPA2,HSPA8,HSPB1,ITGB1,JPH2,LAMA2,MAP1A,MCAM,MFGE8,MYH10,MYO18A,MYO1C,MYPN,NEXN,NPPA,OPA1,OXCT1,PLN,POSTN,RRAS,RRAS2,RTN4,SERPINE2,SLC25A5,SLMAP,SNCA,SORBS1,STMN1,SYNPO2,THBS4,TMEM109,TPM1,TTN,UTRN,VCL,YWHAE,YWHAQ
GO:0007275	multicellular organism development	97	4726	3.64e-10	ENSP00000052754,ENSP00000196371,ENSP00000211998,ENSP00000218867,ENSP00000225964,ENSP00000246792,ENSP00000251645,ENSP00000262506,ENSP00000262551,ENSP00000264036,ENSP00000264059,ENSP00000264335,ENSP00000265077,ENSP00000265131,ENSP00000266718,ENSP00000268150,ENSP00000268835,ENSP00000269141,ENSP00000274341,ENSP00000284440,ENSP00000295550,ENSP00000296130,ENSP00000297268,ENSP00000300026,ENSP00000304408…	ABAT,ACTN1,ACTN2,AGRN,ALDH3A2,ANG,ANKRD1,ASPN,ATP2B4,CDH2,CLEC3B,COL12A1,COL18A1,COL1A1,COL1A2,COL3A1,COL4A1,COL4A2,COL5A1,COL6A1,COL6A3,CRELD1,CRIP2,CSNK2A2,CSRP3,CTNNA1,DAG1,DCN,DMD,DPYSL3,EFHD1,FBLN1,FBN1,FHL1,FLII,FN1,GATM,GSN,GYS1,HAPLN1,HSPG2,ITGA7,ITGB1,KRT31,LAMA2,LAMB2,LTBP4,LUM,MAP4,MCAM,MFAP2,MFAP5,MFGE8,MYH10,MYH7,MYL3,MYPN,NCAM1,NES,NEXN,NPPA,OBSCN,OBSL1,OGN,OPA1,OXCT1,PDLIM5,PLN,POS…
GO:0048513	animal organ development	72	2926	3.74e-10	ENSP00000052754,ENSP00000196371,ENSP00000218867,ENSP00000225964,ENSP00000246792,ENSP00000251645,ENSP00000262506,ENSP00000264335,ENSP00000265131,ENSP00000266718,ENSP00000268835,ENSP00000269141,ENSP00000295550,ENSP00000296130,ENSP00000297268,ENSP00000300026,ENSP00000304408,ENSP00000304669,ENSP00000317904,ENSP00000321856,ENSP00000325527,ENSP00000333938,ENSP00000336762,ENSP00000337838,ENSP00000338343…	ABAT,ACTN1,ACTN2,ANG,ANKRD1,ASPN,ATP2B4,CDH2,CLEC3B,COL18A1,COL1A1,COL1A2,COL3A1,COL4A1,COL5A1,COL6A3,CRELD1,CRIP2,CSNK2A2,CSRP3,CTNNA1,DAG1,DCN,DMD,FBN1,FHL1,FN1,GYS1,HSPG2,ITGA7,ITGB1,KRT31,LAMA2,LAMB2,LUM,MFAP2,MFAP5,MYH10,MYH7,MYL3,MYPN,NES,NEXN,NPPA,OBSL1,OPA1,OXCT1,PDLIM5,PLN,PPIB,PRKAR1A,PRPS1,PRPSAP2,RRAS,RTN4,SERPINE2,SERPINH1,SGCD,SGCE,SGCG,SORBS2,STMN1,SVIL,TGFBI,TGM2,TNC,TPM1,TTN,UTRN…
GO:0030199	collagen fibril organization	11	39	4.39e-10	ENSP00000225964,ENSP00000266718,ENSP00000297268,ENSP00000297848,ENSP00000304408,ENSP00000325146,ENSP00000347041,ENSP00000356791,ENSP00000360882,ENSP00000407685,ENSP00000434412	COL12A1,COL14A1,COL1A1,COL1A2,COL3A1,COL5A1,DPT,FMOD,LUM,SERPINH1,TNXB
GO:0009653	anatomical structure morphogenesis	57	1992	5.06e-10	ENSP00000052754,ENSP00000211998,ENSP00000225964,ENSP00000246792,ENSP00000258341,ENSP00000261448,ENSP00000262551,ENSP00000264036,ENSP00000265131,ENSP00000268150,ENSP00000269141,ENSP00000284440,ENSP00000297268,ENSP00000304408,ENSP00000304669,ENSP00000325146,ENSP00000325527,ENSP00000336762,ENSP00000337838,ENSP00000346839,ENSP00000347507,ENSP00000347665,ENSP00000351022,ENSP00000351790,ENSP00000353590…	ACTN1,ACTN2,ANG,ANKRD1,CASQ2,CDH2,COL12A1,COL18A1,COL1A1,COL1A2,COL3A1,COL4A1,COL4A2,COL5A1,COL6A1,CSRP3,CTNNA1,DAG1,DCN,FBN1,FHL1,FN1,FSCN1,HSPG2,ITGA7,ITGB1,LAMA2,LAMB2,LAMC1,MCAM,MFAP2,MFGE8,MYH10,MYH7,MYL3,MYPN,NCAM1,OBSCN,OBSL1,OGN,OPA1,POSTN,PRKAR1A,RRAS,RTN4,S100A6,SERPINE2,SERPINH1,STMN1,TGFBI,TGM2,TNC,TPM1,TTN,UCHL1,VCL,XIRP2
GO:0032502	developmental process	105	5401	5.53e-10	ENSP00000052754,ENSP00000196371,ENSP00000211998,ENSP00000218867,ENSP00000225964,ENSP00000246792,ENSP00000247461,ENSP00000251645,ENSP00000258341,ENSP00000261448,ENSP00000262506,ENSP00000262551,ENSP00000264036,ENSP00000264059,ENSP00000264335,ENSP00000265077,ENSP00000265131,ENSP00000266718,ENSP00000268150,ENSP00000268835,ENSP00000269141,ENSP00000274341,ENSP00000284440,ENSP00000295550,ENSP00000296130…	ABAT,ACTN1,ACTN2,AGRN,ALDH3A2,ANG,ANKRD1,ASPN,ATP2B4,CANX,CASQ2,CDH2,CLEC3B,COL12A1,COL18A1,COL1A1,COL1A2,COL3A1,COL4A1,COL4A2,COL5A1,COL6A1,COL6A3,COMT,CRELD1,CRIP2,CSNK2A2,CSRP3,CTNNA1,DAG1,DCN,DMD,DPYSL3,EFHD1,FBLN1,FBN1,FHL1,FLII,FLNC,FN1,FSCN1,GATM,GSN,GYS1,HAPLN1,HSPA2,HSPG2,ITGA7,ITGB1,KRT31,LAMA2,LAMB2,LAMC1,LTBP4,LUM,MAP4,MCAM,MFAP2,MFAP5,MFGE8,MYH10,MYH7,MYL3,MYPN,NCAM1,NES,NEXN,NPPA,OB…
GO:0007507	heart development	27	485	6.94e-10	ENSP00000196371,ENSP00000218867,ENSP00000304408,ENSP00000317904,ENSP00000321856,ENSP00000325527,ENSP00000333938,ENSP00000337838,ENSP00000338343,ENSP00000347507,ENSP00000347852,ENSP00000350132,ENSP00000351022,ENSP00000351790,ENSP00000353590,ENSP00000360762,ENSP00000360882,ENSP00000365663,ENSP00000376475,ENSP00000379210,ENSP00000379350,ENSP00000385636,ENSP00000386840,ENSP00000431813,ENSP00000443495…	ACTN2,ANKRD1,COL3A1,COL5A1,CRELD1,CSRP3,FBN1,GYS1,ITGB1,MYH10,MYH7,MYL3,MYPN,NEXN,NPPA,OBSL1,OXCT1,PDLIM5,PLN,PRKAR1A,RTN4,SGCD,SGCG,SORBS2,TPM1,TTN,XIRP2
GO:0030239	myofibril assembly	12	59	1.1e-09	ENSP00000261448,ENSP00000351022,ENSP00000351790,ENSP00000353590,ENSP00000360762,ENSP00000376475,ENSP00000379350,ENSP00000385636,ENSP00000431813,ENSP00000443495,ENSP00000455507,ENSP00000467141	ACTN2,ANKRD1,CASQ2,CSRP3,ITGB1,MYH10,MYPN,OBSCN,OBSL1,PRKAR1A,TPM1,TTN
GO:0031032	actomyosin structure organization	14	97	1.22e-09	ENSP00000261448,ENSP00000351022,ENSP00000351790,ENSP00000353590,ENSP00000360293,ENSP00000360762,ENSP00000376475,ENSP00000379350,ENSP00000385636,ENSP00000431813,ENSP00000437073,ENSP00000443495,ENSP00000455507,ENSP00000467141	ACTN2,ANKRD1,CASQ2,CSRP3,ITGB1,MYH10,MYO18A,MYPN,OBSCN,OBSL1,PRKAR1A,SORBS1,TPM1,TTN
GO:0003008	system process	53	1827	1.89e-09	ENSP00000211998,ENSP00000217652,ENSP00000218867,ENSP00000225964,ENSP00000261448,ENSP00000264036,ENSP00000266718,ENSP00000284031,ENSP00000284440,ENSP00000295951,ENSP00000297268,ENSP00000300231,ENSP00000316029,ENSP00000336775,ENSP00000338343,ENSP00000338345,ENSP00000347507,ENSP00000347665,ENSP00000347852,ENSP00000349320,ENSP00000350132,ENSP00000351022,ENSP00000353590,ENSP00000354468,ENSP00000354490…	ABAT,ACTN2,ATP1A2,CACNA2D1,CASQ2,COL18A1,COL1A1,COL1A2,COMT,CSRP3,CYB5R3,DDAH1,DES,DMD,DTNA,DYSF,GATM,GSN,ITGB1,LAMB2,LUM,MAP1A,MCAM,MYH10,MYH7,MYL12A,MYL3,NPPA,OBSL1,OPA1,PDLIM5,PLN,POSTN,PRKAR1A,SERPINE2,SGCD,SGCE,SGCG,SLMAP,SNCA,SORBS1,SORBS2,SYNM,SYNPO,TGFBI,TLN1,TPM1,TPM3,TTN,UCHL1,UTRN,VCL,VIM
GO:0045214	sarcomere organization	10	38	6.21e-09	ENSP00000261448,ENSP00000351022,ENSP00000351790,ENSP00000360762,ENSP00000376475,ENSP00000379350,ENSP00000385636,ENSP00000443495,ENSP00000455507,ENSP00000467141	ACTN2,ANKRD1,CASQ2,ITGB1,MYPN,OBSCN,OBSL1,PRKAR1A,TPM1,TTN
GO:0048468	cell development	46	1493	7.95e-09	ENSP00000211998,ENSP00000218867,ENSP00000258341,ENSP00000261448,ENSP00000262551,ENSP00000264059,ENSP00000265131,ENSP00000284440,ENSP00000304669,ENSP00000327145,ENSP00000333938,ENSP00000336762,ENSP00000337838,ENSP00000338343,ENSP00000343690,ENSP00000346839,ENSP00000347665,ENSP00000347852,ENSP00000351022,ENSP00000351790,ENSP00000353375,ENSP00000353590,ENSP00000354923,ENSP00000357709,ENSP00000360762…	ACTN1,ACTN2,AGRN,ANG,ANKRD1,CASQ2,COL18A1,CSRP3,CTNNA1,DAG1,DMD,DPYSL3,EFHD1,FLNC,FN1,GSN,HSPA2,ITGB1,LAMA2,LAMB2,LAMC1,MAP4,MYH10,MYPN,NCAM1,NEXN,NPPA,OBSCN,OBSL1,OGN,PDLIM5,POSTN,PRKAR1A,RTN4,S100A6,SERPINH1,SGCD,SGCG,SORBS2,STMN1,TNC,TPM1,TTN,UCHL1,VCL,VIM
GO:0055013	cardiac muscle cell development	10	49	5.11e-08	ENSP00000333938,ENSP00000347852,ENSP00000351790,ENSP00000353590,ENSP00000365663,ENSP00000385636,ENSP00000431813,ENSP00000443495,ENSP00000467141,ENSP00000480359	ACTN2,CSRP3,MYH10,MYPN,NEXN,NPPA,OBSL1,PDLIM5,SORBS2,TTN
GO:0007517	muscle organ development	19	287	6.17e-08	ENSP00000052754,ENSP00000218867,ENSP00000295550,ENSP00000304408,ENSP00000338343,ENSP00000347507,ENSP00000348128,ENSP00000351022,ENSP00000354923,ENSP00000356515,ENSP00000360762,ENSP00000377710,ENSP00000379210,ENSP00000386840,ENSP00000398930,ENSP00000400365,ENSP00000431813,ENSP00000452120,ENSP00000467141	ANKRD1,COL3A1,COL6A3,CSRP3,DCN,DMD,FHL1,ITGA7,LAMA2,MYH7,MYL3,SGCD,SGCE,SGCG,SVIL,TPM1,TTN,UTRN,XIRP2
GO:0010033	response to organic substance	65	2815	6.94e-08	ENSP00000052754,ENSP00000196371,ENSP00000225964,ENSP00000247461,ENSP00000248553,ENSP00000261448,ENSP00000261883,ENSP00000261978,ENSP00000265131,ENSP00000266718,ENSP00000285381,ENSP00000296130,ENSP00000297268,ENSP00000299767,ENSP00000300527,ENSP00000300574,ENSP00000302476,ENSP00000302961,ENSP00000304408,ENSP00000304669,ENSP00000311905,ENSP00000316029,ENSP00000325527,ENSP00000327336,ENSP00000327801…	ABAT,ACTN2,AGRN,ANG,ANKRD1,ASPN,ATP1A2,ATP2B4,BGN,CA1,CA3,CACNA2D1,CANX,CASQ2,CILP,CLEC3B,COL1A1,COL1A2,COL3A1,COL4A1,COL4A2,COL6A1,COL6A2,COMT,CRK,CTNNA1,DAG1,DCN,DNAJB4,DPYSL3,FBN1,FMOD,FN1,FSCN1,GSN,HSP90B1,HSPA2,HSPA4,HSPA8,HSPB1,HSPB2,ITGB1,LTBP2,LTBP4,LUM,MYO1C,NCAM1,NPPA,OPA1,OXCT1,P4HB,PFKP,PLN,POSTN,PRKAR1A,SERPINH1,SLC25A5,SNCA,SORBS1,SRM,THBS4,TLN1,TNC,TUBA1B,VIM
GO:0003015	heart process	12	92	8.81e-08	ENSP00000218867,ENSP00000261448,ENSP00000338343,ENSP00000347507,ENSP00000349320,ENSP00000350132,ENSP00000351022,ENSP00000354490,ENSP00000354923,ENSP00000379210,ENSP00000431813,ENSP00000467141	ATP1A2,CACNA2D1,CASQ2,CSRP3,DMD,MYH7,MYL3,PLN,SGCD,SGCG,TPM1,TTN
GO:0030049	muscle filament sliding	9	38	1.05e-07	ENSP00000347507,ENSP00000351022,ENSP00000354923,ENSP00000357516,ENSP00000363071,ENSP00000379210,ENSP00000443495,ENSP00000446007,ENSP00000467141	ACTN2,DES,DMD,MYH7,MYL3,TPM1,TPM3,TTN,VIM
GO:0055007	cardiac muscle cell differentiation	11	79	2.13e-07	ENSP00000333938,ENSP00000347852,ENSP00000351790,ENSP00000353590,ENSP00000365663,ENSP00000379350,ENSP00000385636,ENSP00000431813,ENSP00000443495,ENSP00000467141,ENSP00000480359	ACTN2,CSRP3,ITGB1,MYH10,MYPN,NEXN,NPPA,OBSL1,PDLIM5,SORBS2,TTN
GO:0060047	heart contraction	11	81	2.65e-07	ENSP00000218867,ENSP00000261448,ENSP00000338343,ENSP00000347507,ENSP00000349320,ENSP00000351022,ENSP00000354490,ENSP00000354923,ENSP00000379210,ENSP00000431813,ENSP00000467141	ATP1A2,CACNA2D1,CASQ2,CSRP3,DMD,MYH7,MYL3,SGCD,SGCG,TPM1,TTN
GO:0009987	cellular process	190	14652	2.75e-07	ENSP00000052754,ENSP00000196371,ENSP00000211998,ENSP00000215567,ENSP00000216218,ENSP00000216286,ENSP00000216962,ENSP00000217244,ENSP00000217971,ENSP00000218867,ENSP00000225964,ENSP00000227525,ENSP00000234454,ENSP00000237642,ENSP00000246792,ENSP00000247461,ENSP00000248437,ENSP00000248553,ENSP00000251645,ENSP00000256196,ENSP00000258341,ENSP00000261448,ENSP00000261883,ENSP00000261978,ENSP00000262418…	ABAT,ABI3BP,ACTN1,ACTN2,ACTR1A,AGRN,ALDH3A2,ALDH4A1,ANG,ANKRD1,ARHGAP1,ASPN,ATP1A2,ATP2B4,BCAP31,BGN,CA1,CA3,CACNA2D1,CANX,CASQ2,CDH2,CHCHD6,CILP,CLEC3B,CLTB,CLTC,CMBL,COL12A1,COL14A1,COL18A1,COL1A1,COL1A2,COL3A1,COL4A1,COL4A2,COL5A1,COL6A1,COL6A2,COL6A3,COMT,CRK,CSNK2A1,CSNK2A2,CSRP3,CTNNA1,CYB5R3,DAG1,DCN,DDAH1,DES,DMD,DNAJB4,DPM1,DPM3,DPT,DPYSL3,DTNA,DYNC1H1,DYNLT3,DYSF,EFHD1,FAM129A,FBLN1,FBL…
GO:0030048	actin filament-based movement	12	105	2.9e-07	ENSP00000347507,ENSP00000349320,ENSP00000351022,ENSP00000352834,ENSP00000353590,ENSP00000354923,ENSP00000357516,ENSP00000363071,ENSP00000379210,ENSP00000443495,ENSP00000446007,ENSP00000467141	ACTN2,CACNA2D1,DES,DMD,MYH10,MYH7,MYL3,MYO1C,TPM1,TPM3,TTN,VIM
GO:0006941	striated muscle contraction	12	111	5.04e-07	ENSP00000261448,ENSP00000336775,ENSP00000347507,ENSP00000349320,ENSP00000351022,ENSP00000354490,ENSP00000354923,ENSP00000379210,ENSP00000385636,ENSP00000431813,ENSP00000467141,ENSP00000470152	ATP1A2,CACNA2D1,CASQ2,CSRP3,DMD,DTNA,MYH7,MYL3,OBSL1,SYNM,TPM1,TTN
GO:0071560	cellular response to transforming growth factor beta stimulus	13	140	6.26e-07	ENSP00000225964,ENSP00000261883,ENSP00000261978,ENSP00000296130,ENSP00000297268,ENSP00000300574,ENSP00000304408,ENSP00000311905,ENSP00000325527,ENSP00000347041,ENSP00000353654,ENSP00000360762,ENSP00000369071	ANKRD1,CILP,CLEC3B,COL1A1,COL1A2,COL3A1,COL4A2,CRK,FBN1,FMOD,LTBP2,LTBP4,POSTN
GO:0007160	cell-matrix adhesion	12	119	9.94e-07	ENSP00000211998,ENSP00000216286,ENSP00000304408,ENSP00000345008,ENSP00000346839,ENSP00000360293,ENSP00000377941,ENSP00000379350,ENSP00000398930,ENSP00000442600,ENSP00000443495,ENSP00000452120	ACTN1,ACTN2,COL3A1,DAG1,FBLN5,FN1,ITGA7,ITGB1,NID2,SGCE,SORBS1,VCL
GO:0032989	cellular component morphogenesis	27	720	1.62e-06	ENSP00000211998,ENSP00000258341,ENSP00000261448,ENSP00000262551,ENSP00000284440,ENSP00000346839,ENSP00000347665,ENSP00000351022,ENSP00000351790,ENSP00000353590,ENSP00000354681,ENSP00000357709,ENSP00000360762,ENSP00000369071,ENSP00000376475,ENSP00000377941,ENSP00000379350,ENSP00000385636,ENSP00000388325,ENSP00000400365,ENSP00000410452,ENSP00000431813,ENSP00000442600,ENSP00000443495,ENSP00000455507…	ACTN1,ACTN2,ANKRD1,CASQ2,COL18A1,CSRP3,DAG1,FN1,ITGB1,LAMA2,LAMB2,LAMC1,MYH10,MYPN,NCAM1,OBSCN,OBSL1,OGN,OPA1,POSTN,PRKAR1A,S100A6,STMN1,TPM1,TTN,UCHL1,VCL
GO:0048646	anatomical structure formation involved in morphogenesis	29	831	2.1e-06	ENSP00000225964,ENSP00000261448,ENSP00000264036,ENSP00000268150,ENSP00000325146,ENSP00000336762,ENSP00000337838,ENSP00000346839,ENSP00000347665,ENSP00000351022,ENSP00000351790,ENSP00000353590,ENSP00000353654,ENSP00000355180,ENSP00000355330,ENSP00000360762,ENSP00000363827,ENSP00000364979,ENSP00000376475,ENSP00000377941,ENSP00000379350,ENSP00000385636,ENSP00000416330,ENSP00000431813,ENSP00000442600…	ACTN1,ACTN2,ANG,ANKRD1,CASQ2,COL12A1,COL18A1,COL1A1,COL4A1,COL4A2,COL6A1,CSRP3,DAG1,FN1,HSPG2,ITGA7,ITGB1,MCAM,MFGE8,MYH10,MYPN,OBSCN,OBSL1,PRKAR1A,RTN4,TGFBI,TGM2,TPM1,TTN
GO:0031589	cell-substrate adhesion	13	162	2.81e-06	ENSP00000211998,ENSP00000216286,ENSP00000258341,ENSP00000304408,ENSP00000345008,ENSP00000346839,ENSP00000360293,ENSP00000377941,ENSP00000379350,ENSP00000398930,ENSP00000442600,ENSP00000443495,ENSP00000452120	ACTN1,ACTN2,COL3A1,DAG1,FBLN5,FN1,ITGA7,ITGB1,LAMC1,NID2,SGCE,SORBS1,VCL
GO:0006027	glycosaminoglycan catabolic process	9	62	3.44e-06	ENSP00000052754,ENSP00000262551,ENSP00000265077,ENSP00000266718,ENSP00000327336,ENSP00000343924,ENSP00000347041,ENSP00000363827,ENSP00000368678	AGRN,BGN,DCN,FMOD,HSPG2,LUM,OGN,PRELP,VCAN
GO:0006928	movement of cell or subcellular component	38	1355	3.44e-06	ENSP00000225964,ENSP00000248553,ENSP00000258341,ENSP00000264335,ENSP00000265077,ENSP00000269141,ENSP00000284440,ENSP00000290158,ENSP00000297268,ENSP00000300231,ENSP00000336762,ENSP00000337838,ENSP00000339730,ENSP00000346839,ENSP00000347507,ENSP00000348965,ENSP00000349320,ENSP00000350310,ENSP00000351022,ENSP00000352834,ENSP00000353375,ENSP00000353590,ENSP00000354681,ENSP00000354923,ENSP00000357516…	ACTN2,ANG,ATP2B4,CACNA2D1,CDH2,COL1A1,COL1A2,COL5A1,DAG1,DES,DMD,DYNC1H1,FN1,FSCN1,HSPB1,ITGB1,KPNB1,LAMA2,LAMB2,LAMC1,MAP1A,MAP4,MYH10,MYH7,MYL3,MYO18A,MYO1C,NCAM1,OPA1,RTN4,THBS4,TPM1,TPM3,TTN,UCHL1,VCAN,VIM,YWHAE
GO:0034330	cell junction organization	14	197	3.44e-06	ENSP00000211998,ENSP00000258341,ENSP00000269141,ENSP00000304669,ENSP00000316029,ENSP00000323856,ENSP00000327145,ENSP00000336762,ENSP00000346839,ENSP00000360293,ENSP00000371798,ENSP00000377941,ENSP00000386840,ENSP00000443495	ACTN1,ACTN2,ANG,CDH2,CTNNA1,FLNC,FN1,FSCN1,LAMC1,PLEC,SORBS1,TLN1,VCL,XIRP2
GO:0070252	actin-mediated cell contraction	10	84	3.44e-06	ENSP00000347507,ENSP00000349320,ENSP00000351022,ENSP00000354923,ENSP00000357516,ENSP00000363071,ENSP00000379210,ENSP00000443495,ENSP00000446007,ENSP00000467141	ACTN2,CACNA2D1,DES,DMD,MYH7,MYL3,TPM1,TPM3,TTN,VIM
GO:0050896	response to stimulus	122	7824	4.11e-06	ENSP00000052754,ENSP00000196371,ENSP00000203630,ENSP00000211998,ENSP00000216962,ENSP00000217244,ENSP00000217971,ENSP00000225964,ENSP00000227525,ENSP00000237642,ENSP00000246792,ENSP00000247461,ENSP00000248553,ENSP00000256196,ENSP00000261448,ENSP00000261883,ENSP00000261978,ENSP00000262506,ENSP00000263433,ENSP00000264036,ENSP00000264335,ENSP00000265131,ENSP00000266718,ENSP00000271064,ENSP00000284031…	ABAT,ACTN2,AGRN,ANG,ANKRD1,ARHGAP1,ASPN,ATP1A2,ATP2B4,BCAP31,BGN,CA1,CA3,CACNA2D1,CANX,CASQ2,CHCHD6,CILP,CLEC3B,CLTC,CMBL,COL18A1,COL1A1,COL1A2,COL3A1,COL4A1,COL4A2,COL5A1,COL6A1,COL6A2,COMT,CRK,CSNK2A1,CSNK2A2,CSRP3,CTNNA1,CYB5R3,DAG1,DCN,DDAH1,DMD,DNAJB4,DPYSL3,DTNA,DYNC1H1,DYSF,FAM129A,FBLN1,FBN1,FMOD,FN1,FSCN1,GATM,GSN,HBD,HSP90B1,HSPA2,HSPA4,HSPA8,HSPB1,HSPB2,HSPG2,ITGA7,ITGB1,JPH2,KPNB1,LAM…
GO:0022607	cellular component assembly	53	2343	5.54e-06	ENSP00000211998,ENSP00000216218,ENSP00000225964,ENSP00000248437,ENSP00000258341,ENSP00000261448,ENSP00000264335,ENSP00000269141,ENSP00000290158,ENSP00000297268,ENSP00000299767,ENSP00000300527,ENSP00000300574,ENSP00000302961,ENSP00000304669,ENSP00000306015,ENSP00000316029,ENSP00000323856,ENSP00000327145,ENSP00000327801,ENSP00000336762,ENSP00000337838,ENSP00000341289,ENSP00000343690,ENSP00000345008…	ACTN1,ACTN2,ACTR1A,ANG,ANKRD1,CASQ2,CDH2,CLTC,COL1A1,COL1A2,COL6A1,COL6A2,CRK,CSRP3,CTNNA1,DMD,DPYSL3,DYNC1H1,FBLN5,FLNC,FMOD,FN1,FSCN1,GSN,HSP90B1,HSPA4,ITGB1,KPNB1,LAMC1,MYH10,MYPN,OBSCN,OBSL1,OPA1,P4HB,PLEC,PLN,PRKAR1A,RTN4,SEC22B,SORBS1,ST13,SYNPO,SYNPO2,TGM2,TLN1,TNXB,TPM1,TTN,TUBA4A,TUBB4B,VCL,YWHAE
GO:0051270	regulation of cellular component movement	29	886	6.68e-06	ENSP00000052754,ENSP00000211998,ENSP00000225964,ENSP00000246792,ENSP00000248553,ENSP00000256196,ENSP00000264036,ENSP00000300574,ENSP00000304408,ENSP00000304669,ENSP00000306015,ENSP00000331544,ENSP00000333938,ENSP00000337838,ENSP00000339730,ENSP00000343690,ENSP00000346839,ENSP00000347665,ENSP00000350132,ENSP00000351022,ENSP00000351790,ENSP00000352834,ENSP00000354490,ENSP00000369071,ENSP00000377941…	ACTN1,ATP1A2,COL18A1,COL1A1,COL3A1,CRK,CTNNA1,DAG1,DCN,DPYSL3,FBLN1,FN1,HSPB1,LAMA2,MCAM,MYO1C,MYPN,NEXN,PLN,POSTN,RRAS,RRAS2,RTN4,SERPINE2,STMN1,SYNPO2,THBS4,TPM1,VCL
GO:0008015	blood circulation	18	373	1.03e-05	ENSP00000218867,ENSP00000261448,ENSP00000284031,ENSP00000297268,ENSP00000338343,ENSP00000347507,ENSP00000349320,ENSP00000350132,ENSP00000351022,ENSP00000354468,ENSP00000354490,ENSP00000354923,ENSP00000365663,ENSP00000369071,ENSP00000379210,ENSP00000379845,ENSP00000431813,ENSP00000467141	ABAT,ATP1A2,CACNA2D1,CASQ2,COL1A2,CSRP3,CYB5R3,DDAH1,DMD,MYH7,MYL3,NPPA,PLN,POSTN,SGCD,SGCG,TPM1,TTN
GO:0060048	cardiac muscle contraction	9	73	1.08e-05	ENSP00000261448,ENSP00000347507,ENSP00000349320,ENSP00000351022,ENSP00000354490,ENSP00000354923,ENSP00000379210,ENSP00000431813,ENSP00000467141	ATP1A2,CACNA2D1,CASQ2,CSRP3,DMD,MYH7,MYL3,TPM1,TTN
GO:0071310	cellular response to organic substance	50	2219	1.47e-05	ENSP00000052754,ENSP00000225964,ENSP00000247461,ENSP00000248553,ENSP00000261448,ENSP00000261883,ENSP00000261978,ENSP00000265131,ENSP00000296130,ENSP00000297268,ENSP00000299767,ENSP00000300574,ENSP00000304408,ENSP00000304669,ENSP00000311905,ENSP00000316029,ENSP00000325527,ENSP00000327336,ENSP00000327801,ENSP00000336799,ENSP00000338345,ENSP00000343690,ENSP00000346839,ENSP00000347041,ENSP00000349320…	ACTN2,AGRN,ANKRD1,ASPN,ATP1A2,ATP2B4,BGN,CA1,CACNA2D1,CANX,CASQ2,CILP,CLEC3B,COL1A1,COL1A2,COL3A1,COL4A1,COL4A2,COL6A1,CRK,CTNNA1,DAG1,DCN,DPYSL3,FBN1,FMOD,FN1,FSCN1,GSN,HSP90B1,HSPA8,HSPB1,ITGB1,LTBP2,LTBP4,MYO1C,NCAM1,OPA1,P4HB,PFKP,POSTN,PRKAR1A,SLC25A5,SNCA,SORBS1,SRM,TLN1,TNC,TUBA1B,VIM
GO:0022898	regulation of transmembrane transporter activity	14	232	1.87e-05	ENSP00000261448,ENSP00000264335,ENSP00000295951,ENSP00000338345,ENSP00000349320,ENSP00000350132,ENSP00000354490,ENSP00000354923,ENSP00000356515,ENSP00000362071,ENSP00000365663,ENSP00000377710,ENSP00000378199,ENSP00000443495	ACTN2,ATP1A2,CACNA2D1,CASQ2,DMD,FHL1,HSPA2,JPH2,NPPA,PLN,SLMAP,SNCA,UTRN,YWHAE
GO:0051128	regulation of cellular component organization	51	2306	1.87e-05	ENSP00000052754,ENSP00000217244,ENSP00000264335,ENSP00000268150,ENSP00000269141,ENSP00000300574,ENSP00000306015,ENSP00000311905,ENSP00000331544,ENSP00000333938,ENSP00000337838,ENSP00000338345,ENSP00000343690,ENSP00000345008,ENSP00000346839,ENSP00000348965,ENSP00000351022,ENSP00000351790,ENSP00000352834,ENSP00000353375,ENSP00000353590,ENSP00000354681,ENSP00000354923,ENSP00000357206,ENSP00000360671…	ACTN2,AGRN,ANKRD1,CDH2,CLTC,COL5A1,CRK,CSNK2A1,DAG1,DCN,DMD,DPYSL3,DYNC1H1,FBLN1,FBLN5,FHL1,FN1,FSCN1,GSN,HSPA2,HSPA8,HSPG2,ITGA7,LTBP4,MAP4,MFGE8,MYH10,MYO18A,MYO1C,MYPN,NES,NEXN,NPPA,OBSL1,OPA1,PDLIM5,POSTN,PRKAR1A,RTN4,SEC22B,SERPINE2,SLC25A5,SNCA,STMN1,SYNPO,SYNPO2,SYNPO2L,TPM1,VIM,YWHAE,YWHAQ
GO:0034329	cell junction assembly	11	135	2.14e-05	ENSP00000211998,ENSP00000258341,ENSP00000304669,ENSP00000316029,ENSP00000323856,ENSP00000327145,ENSP00000346839,ENSP00000360293,ENSP00000371798,ENSP00000377941,ENSP00000443495	ACTN1,ACTN2,CTNNA1,FLNC,FN1,FSCN1,LAMC1,PLEC,SORBS1,TLN1,VCL
GO:0007015	actin filament organization	13	200	2.16e-05	ENSP00000299767,ENSP00000304669,ENSP00000336762,ENSP00000343690,ENSP00000347852,ENSP00000351022,ENSP00000357516,ENSP00000360293,ENSP00000362924,ENSP00000371798,ENSP00000377941,ENSP00000385636,ENSP00000467141	ACTN1,ANG,CTNNA1,DPYSL3,FSCN1,GSN,HSP90B1,OBSL1,SORBS1,SORBS2,TPM1,TPM3,TTN
GO:0008016	regulation of heart contraction	13	201	2.24e-05	ENSP00000261448,ENSP00000264335,ENSP00000347507,ENSP00000349320,ENSP00000350132,ENSP00000350310,ENSP00000351022,ENSP00000354490,ENSP00000354923,ENSP00000363071,ENSP00000365663,ENSP00000379210,ENSP00000431813	ATP1A2,ATP2B4,CACNA2D1,CASQ2,CSRP3,DES,DMD,MYH7,MYL3,NPPA,PLN,TPM1,YWHAE
GO:0007044	cell-substrate junction assembly	7	40	2.7e-05	ENSP00000258341,ENSP00000316029,ENSP00000323856,ENSP00000346839,ENSP00000360293,ENSP00000377941,ENSP00000443495	ACTN1,ACTN2,FN1,LAMC1,PLEC,SORBS1,TLN1
GO:0044085	cellular component biogenesis	54	2556	2.93e-05	ENSP00000211998,ENSP00000216218,ENSP00000225964,ENSP00000248437,ENSP00000258341,ENSP00000261448,ENSP00000264335,ENSP00000269141,ENSP00000290158,ENSP00000297268,ENSP00000299767,ENSP00000300527,ENSP00000300574,ENSP00000302961,ENSP00000304669,ENSP00000306015,ENSP00000316029,ENSP00000323856,ENSP00000327145,ENSP00000327801,ENSP00000336762,ENSP00000337838,ENSP00000341289,ENSP00000342962,ENSP00000343690…	ACTN1,ACTN2,ACTR1A,ANG,ANKRD1,CASQ2,CDH2,CLTC,COL1A1,COL1A2,COL6A1,COL6A2,CRK,CSRP3,CTNNA1,DMD,DPYSL3,DYNC1H1,FBLN5,FLNC,FMOD,FN1,FSCN1,GSN,HSP90B1,HSPA4,ITGB1,KPNB1,LAMC1,MYH10,MYPN,OBSCN,OBSL1,OPA1,P4HB,PLEC,PLN,PRKAR1A,RTN4,SEC22B,SERINC1,SORBS1,ST13,SYNPO,SYNPO2,TGM2,TLN1,TNXB,TPM1,TTN,TUBA4A,TUBB4B,VCL,YWHAE
GO:0009611	response to wounding	21	547	3.14e-05	ENSP00000052754,ENSP00000225964,ENSP00000264036,ENSP00000265131,ENSP00000297268,ENSP00000304408,ENSP00000304669,ENSP00000331544,ENSP00000343690,ENSP00000346839,ENSP00000351022,ENSP00000353590,ENSP00000360882,ENSP00000362924,ENSP00000369071,ENSP00000369654,ENSP00000376475,ENSP00000386881,ENSP00000388325,ENSP00000415786,ENSP00000442600	COL1A1,COL1A2,COL3A1,COL5A1,CTNNA1,DAG1,DCN,DPYSL3,DYSF,FBLN1,FN1,GSN,HBD,LAMB2,MCAM,MYH10,POSTN,PRKAR1A,SERPINE2,TNC,TPM1
GO:0009612	response to mechanical stimulus	13	210	3.36e-05	ENSP00000052754,ENSP00000225964,ENSP00000265131,ENSP00000304408,ENSP00000354490,ENSP00000354923,ENSP00000360762,ENSP00000365663,ENSP00000369071,ENSP00000415786,ENSP00000431813,ENSP00000442600,ENSP00000467141	ANKRD1,ATP1A2,COL1A1,COL3A1,CSRP3,DAG1,DCN,DMD,NPPA,POSTN,SERPINE2,TNC,TTN
GO:0006457	protein folding	13	214	4.05e-05	ENSP00000216218,ENSP00000217244,ENSP00000247461,ENSP00000248553,ENSP00000299767,ENSP00000300026,ENSP00000311905,ENSP00000327801,ENSP00000359799,ENSP00000365663,ENSP00000378199,ENSP00000432083,ENSP00000468057	CANX,CSNK2A1,DNAJB4,HSP90B1,HSPA2,HSPA8,HSPB1,HSPB6,LTBP4,NPPA,P4HB,PPIB,ST13
GO:1904062	regulation of cation transmembrane transport	15	294	4.69e-05	ENSP00000261448,ENSP00000264335,ENSP00000295951,ENSP00000338345,ENSP00000349320,ENSP00000350132,ENSP00000350310,ENSP00000354490,ENSP00000354923,ENSP00000356515,ENSP00000362071,ENSP00000365663,ENSP00000377710,ENSP00000378199,ENSP00000443495	ACTN2,ATP1A2,ATP2B4,CACNA2D1,CASQ2,DMD,FHL1,HSPA2,JPH2,NPPA,PLN,SLMAP,SNCA,UTRN,YWHAE
GO:0002026	regulation of the force of heart contraction	6	27	4.78e-05	ENSP00000347507,ENSP00000350132,ENSP00000350310,ENSP00000354490,ENSP00000379210,ENSP00000431813	ATP1A2,ATP2B4,CSRP3,MYH7,MYL3,PLN
GO:1901019	regulation of calcium ion transmembrane transporter activity	9	91	4.79e-05	ENSP00000261448,ENSP00000264335,ENSP00000349320,ENSP00000350132,ENSP00000354490,ENSP00000354923,ENSP00000362071,ENSP00000365663,ENSP00000378199	ATP1A2,CACNA2D1,CASQ2,DMD,HSPA2,JPH2,NPPA,PLN,YWHAE
GO:0065008	regulation of biological quality	67	3559	4.81e-05	ENSP00000052754,ENSP00000196371,ENSP00000224807,ENSP00000225964,ENSP00000234454,ENSP00000248553,ENSP00000261448,ENSP00000262418,ENSP00000264335,ENSP00000269141,ENSP00000277865,ENSP00000284031,ENSP00000295951,ENSP00000297268,ENSP00000299767,ENSP00000300026,ENSP00000300231,ENSP00000300574,ENSP00000304408,ENSP00000310491,ENSP00000311905,ENSP00000316029,ENSP00000325527,ENSP00000327801,ENSP00000331544…	ABAT,ACTN2,AGRN,ANG,ARHGAP1,ATP1A2,ATP2B4,BCAP31,CACNA2D1,CASQ2,CDH2,COL1A1,COL1A2,COL3A1,COMT,CRK,CSRP3,DAG1,DCN,DDAH1,DMD,DPM3,FBLN1,FBN1,FHL1,FN1,GLUD1,GSN,HBD,HK1,HSP90B1,HSPA8,HSPB1,ITGA7,JPH2,LTBP4,MAP1A,MYH10,MYH7,MYL3,MYO1C,NPPA,OPA1,OXCT1,P4HB,PDLIM5,PLN,POSTN,PPIB,PRKAR1A,RDH11,RTN4,SERPINE2,SFXN3,SLC25A5,SLC4A1,SLMAP,SNCA,SPR,STMN1,SYNPO,TGM2,TLN1,TPM1,VIM,YWHAE,YWHAQ
GO:0009628	response to abiotic stimulus	30	1052	5.13e-05	ENSP00000052754,ENSP00000225964,ENSP00000227525,ENSP00000264335,ENSP00000265131,ENSP00000299767,ENSP00000304408,ENSP00000327801,ENSP00000336762,ENSP00000347665,ENSP00000350310,ENSP00000354490,ENSP00000354681,ENSP00000354923,ENSP00000359799,ENSP00000360305,ENSP00000360762,ENSP00000365663,ENSP00000369071,ENSP00000370750,ENSP00000371554,ENSP00000377789,ENSP00000378199,ENSP00000378769,ENSP00000379350…	ABAT,ANG,ANKRD1,ATP1A2,ATP2B4,COL18A1,COL1A1,COL3A1,CSRP3,DAG1,DCN,DMD,DNAJB4,HSP90B1,HSPA2,ITGB1,NPPA,OPA1,P4HB,PDLIM1,POSTN,PPP1CB,RDH11,SERPINE2,SOD3,SYNPO,TMEM109,TNC,TTN,YWHAE
GO:0003300	cardiac muscle hypertrophy	6	28	5.48e-05	ENSP00000347507,ENSP00000347852,ENSP00000365663,ENSP00000431813,ENSP00000467141,ENSP00000480359	CSRP3,MYH7,NPPA,PDLIM5,SORBS2,TTN
GO:0006996	organelle organization	61	3131	5.73e-05	ENSP00000248437,ENSP00000251645,ENSP00000261448,ENSP00000264335,ENSP00000290158,ENSP00000290913,ENSP00000299767,ENSP00000300231,ENSP00000302961,ENSP00000304669,ENSP00000306015,ENSP00000316029,ENSP00000318697,ENSP00000324573,ENSP00000336762,ENSP00000336775,ENSP00000336799,ENSP00000337838,ENSP00000338345,ENSP00000341289,ENSP00000343690,ENSP00000347852,ENSP00000348128,ENSP00000348965,ENSP00000351022…	ACTN1,ACTN2,ACTR1A,AGRN,ANG,ANKRD1,CASQ2,CHCHD6,CSRP3,CTNNA1,DAG1,DES,DMD,DPYSL3,DYNC1H1,DYSF,FLII,FSCN1,GSN,HSP90B1,HSPA2,HSPA4,ITGB1,KPNB1,KRT31,MAP1A,MAP4,MYH10,MYO18A,MYPN,OBSCN,OBSL1,OPA1,PRKAR1A,PTGFRN,RTN4,SEC22B,SERPINE2,SLC25A5,SNCA,SORBS1,SORBS2,STMN1,SVIL,SYNM,SYNPO,SYNPO2,TLN1,TNXB,TPM1,TPM3,TTN,TUBA1B,TUBA4A,TUBB2A,TUBB4B,TUBB6,VIM,XIRP2,YWHAE,YWHAQ
GO:0032412	regulation of ion transmembrane transporter activity	13	224	5.97e-05	ENSP00000261448,ENSP00000264335,ENSP00000295951,ENSP00000349320,ENSP00000350132,ENSP00000354490,ENSP00000354923,ENSP00000356515,ENSP00000362071,ENSP00000365663,ENSP00000377710,ENSP00000378199,ENSP00000443495	ACTN2,ATP1A2,CACNA2D1,CASQ2,DMD,FHL1,HSPA2,JPH2,NPPA,PLN,SLMAP,UTRN,YWHAE
GO:0090257	regulation of muscle system process	13	224	5.97e-05	ENSP00000261448,ENSP00000347507,ENSP00000350132,ENSP00000350310,ENSP00000351022,ENSP00000354490,ENSP00000354923,ENSP00000356515,ENSP00000365663,ENSP00000379210,ENSP00000379845,ENSP00000442600,ENSP00000468057	ABAT,ATP1A2,ATP2B4,CASQ2,DAG1,DMD,HSPB6,MYH7,MYL3,NPPA,PLN,TPM1,UTRN
GO:0042221	response to chemical	74	4153	7.49e-05	ENSP00000052754,ENSP00000196371,ENSP00000225964,ENSP00000247461,ENSP00000248553,ENSP00000261448,ENSP00000261883,ENSP00000261978,ENSP00000265131,ENSP00000266718,ENSP00000285381,ENSP00000296130,ENSP00000296658,ENSP00000297268,ENSP00000299767,ENSP00000300527,ENSP00000300574,ENSP00000302476,ENSP00000302961,ENSP00000304408,ENSP00000304669,ENSP00000311905,ENSP00000316029,ENSP00000325527,ENSP00000327336…	ABAT,ACTN2,AGRN,ANG,ANKRD1,ASPN,ATP1A2,ATP2B4,BGN,CA1,CA3,CACNA2D1,CANX,CASQ2,CILP,CLEC3B,CMBL,COL18A1,COL1A1,COL1A2,COL3A1,COL4A1,COL4A2,COL6A1,COL6A2,COMT,CRK,CTNNA1,DAG1,DCN,DNAJB4,DPYSL3,FBN1,FMOD,FN1,FSCN1,GSN,HBD,HSP90B1,HSPA2,HSPA4,HSPA8,HSPB1,HSPB2,ITGB1,LAMA2,LAMB2,LTBP2,LTBP4,LUM,MYH10,MYO1C,NCAM1,NPPA,OPA1,OXCT1,P4HB,PFKP,PLN,POSTN,PRKAR1A,SERPINH1,SLC25A5,SNCA,SOD3,SORBS1,SRM,THBS4,TL…
GO:0006024	glycosaminoglycan biosynthetic process	9	101	9.52e-05	ENSP00000052754,ENSP00000262551,ENSP00000265077,ENSP00000266718,ENSP00000327336,ENSP00000343924,ENSP00000347041,ENSP00000363827,ENSP00000368678	AGRN,BGN,DCN,FMOD,HSPG2,LUM,OGN,PRELP,VCAN
GO:0010959	regulation of metal ion transport	16	360	9.62e-05	ENSP00000261448,ENSP00000264335,ENSP00000295951,ENSP00000338345,ENSP00000349320,ENSP00000350132,ENSP00000350310,ENSP00000354490,ENSP00000354923,ENSP00000356515,ENSP00000362071,ENSP00000365663,ENSP00000377710,ENSP00000378199,ENSP00000415786,ENSP00000443495	ACTN2,ATP1A2,ATP2B4,CACNA2D1,CASQ2,DMD,FHL1,HSPA2,JPH2,NPPA,PLN,SERPINE2,SLMAP,SNCA,UTRN,YWHAE
GO:0030334	regulation of cell migration	24	753	9.62e-05	ENSP00000052754,ENSP00000211998,ENSP00000225964,ENSP00000246792,ENSP00000248553,ENSP00000256196,ENSP00000264036,ENSP00000300574,ENSP00000304408,ENSP00000306015,ENSP00000331544,ENSP00000333938,ENSP00000337838,ENSP00000339730,ENSP00000343690,ENSP00000346839,ENSP00000347665,ENSP00000351022,ENSP00000351790,ENSP00000352834,ENSP00000369071,ENSP00000400365,ENSP00000415786,ENSP00000442600	COL18A1,COL1A1,COL3A1,CRK,DAG1,DCN,DPYSL3,FBLN1,FN1,HSPB1,LAMA2,MCAM,MYO1C,MYPN,NEXN,POSTN,RRAS,RRAS2,RTN4,SERPINE2,SYNPO2,THBS4,TPM1,VCL
GO:2000145	regulation of cell motility	25	807	9.62e-05	ENSP00000052754,ENSP00000211998,ENSP00000225964,ENSP00000246792,ENSP00000248553,ENSP00000256196,ENSP00000264036,ENSP00000300574,ENSP00000304408,ENSP00000304669,ENSP00000306015,ENSP00000331544,ENSP00000333938,ENSP00000337838,ENSP00000339730,ENSP00000343690,ENSP00000346839,ENSP00000347665,ENSP00000351022,ENSP00000351790,ENSP00000352834,ENSP00000369071,ENSP00000400365,ENSP00000415786,ENSP00000442600	COL18A1,COL1A1,COL3A1,CRK,CTNNA1,DAG1,DCN,DPYSL3,FBLN1,FN1,HSPB1,LAMA2,MCAM,MYO1C,MYPN,NEXN,POSTN,RRAS,RRAS2,RTN4,SERPINE2,SYNPO2,THBS4,TPM1,VCL
GO:0044273	sulfur compound catabolic process	7	53	0.00011	ENSP00000052754,ENSP00000262551,ENSP00000265077,ENSP00000266718,ENSP00000327336,ENSP00000343924,ENSP00000347041	BGN,DCN,FMOD,LUM,OGN,PRELP,VCAN
GO:0009719	response to endogenous stimulus	34	1353	0.00012	ENSP00000196371,ENSP00000225964,ENSP00000261448,ENSP00000261883,ENSP00000261978,ENSP00000265131,ENSP00000296130,ENSP00000297268,ENSP00000299767,ENSP00000300574,ENSP00000304408,ENSP00000304669,ENSP00000311905,ENSP00000325527,ENSP00000336762,ENSP00000338345,ENSP00000347041,ENSP00000349320,ENSP00000350132,ENSP00000350310,ENSP00000353654,ENSP00000354490,ENSP00000354681,ENSP00000355180,ENSP00000360293…	ACTN2,AGRN,ANG,ANKRD1,ATP1A2,ATP2B4,CACNA2D1,CASQ2,CILP,CLEC3B,COL1A1,COL1A2,COL3A1,COL4A1,COL4A2,COL6A1,CRK,CTNNA1,DAG1,FBN1,FMOD,HSP90B1,ITGB1,LTBP2,LTBP4,NPPA,OPA1,OXCT1,PLN,POSTN,PRKAR1A,SNCA,SORBS1,TNC
GO:0035994	response to muscle stretch	5	18	0.00012	ENSP00000354923,ENSP00000360762,ENSP00000365663,ENSP00000431813,ENSP00000467141	ANKRD1,CSRP3,DMD,NPPA,TTN
GO:0042060	wound healing	18	461	0.00012	ENSP00000052754,ENSP00000225964,ENSP00000264036,ENSP00000265131,ENSP00000297268,ENSP00000304408,ENSP00000331544,ENSP00000346839,ENSP00000351022,ENSP00000353590,ENSP00000360882,ENSP00000362924,ENSP00000369071,ENSP00000369654,ENSP00000376475,ENSP00000386881,ENSP00000415786,ENSP00000442600	COL1A1,COL1A2,COL3A1,COL5A1,DAG1,DCN,DYSF,FBLN1,FN1,GSN,HBD,MCAM,MYH10,POSTN,PRKAR1A,SERPINE2,TNC,TPM1
GO:0051049	regulation of transport	40	1732	0.00012	ENSP00000196371,ENSP00000227525,ENSP00000261448,ENSP00000264335,ENSP00000268150,ENSP00000269141,ENSP00000277865,ENSP00000295951,ENSP00000310491,ENSP00000331544,ENSP00000336762,ENSP00000338345,ENSP00000346839,ENSP00000348965,ENSP00000349320,ENSP00000350132,ENSP00000350310,ENSP00000352834,ENSP00000353590,ENSP00000354490,ENSP00000354511,ENSP00000354681,ENSP00000354923,ENSP00000356515,ENSP00000360293…	ABAT,ACTN2,ANG,ANKRD1,ARHGAP1,ATP1A2,ATP2B4,BCAP31,CACNA2D1,CASQ2,CDH2,COMT,DMD,DYNC1H1,FBLN1,FHL1,FN1,GLUD1,HSPA2,HSPA8,JPH2,MFGE8,MYH10,MYO18A,MYO1C,NPPA,OPA1,OXCT1,PLN,POSTN,SERPINE2,SLC25A5,SLMAP,SNCA,SORBS1,TMEM109,TTN,UTRN,YWHAE,YWHAQ
GO:0001568	blood vessel development	18	464	0.00013	ENSP00000225964,ENSP00000264036,ENSP00000268150,ENSP00000269141,ENSP00000297268,ENSP00000304408,ENSP00000336762,ENSP00000337838,ENSP00000346839,ENSP00000347665,ENSP00000353590,ENSP00000353654,ENSP00000360882,ENSP00000363827,ENSP00000364979,ENSP00000379350,ENSP00000416330,ENSP00000442600	ANG,CDH2,COL18A1,COL1A1,COL1A2,COL3A1,COL4A1,COL4A2,COL5A1,DAG1,FN1,HSPG2,ITGB1,MCAM,MFGE8,MYH10,RTN4,TGFBI
GO:0040012	regulation of locomotion	26	881	0.00013	ENSP00000052754,ENSP00000211998,ENSP00000225964,ENSP00000246792,ENSP00000248553,ENSP00000256196,ENSP00000264036,ENSP00000300574,ENSP00000304408,ENSP00000304669,ENSP00000306015,ENSP00000331544,ENSP00000333938,ENSP00000337838,ENSP00000338345,ENSP00000339730,ENSP00000343690,ENSP00000346839,ENSP00000347665,ENSP00000351022,ENSP00000351790,ENSP00000352834,ENSP00000369071,ENSP00000400365,ENSP00000415786…	COL18A1,COL1A1,COL3A1,CRK,CTNNA1,DAG1,DCN,DPYSL3,FBLN1,FN1,HSPB1,LAMA2,MCAM,MYO1C,MYPN,NEXN,POSTN,RRAS,RRAS2,RTN4,SERPINE2,SNCA,SYNPO2,THBS4,TPM1,VCL
GO:0070925	organelle assembly	22	666	0.00013	ENSP00000248437,ENSP00000261448,ENSP00000264335,ENSP00000290158,ENSP00000306015,ENSP00000341289,ENSP00000348965,ENSP00000351022,ENSP00000351790,ENSP00000353590,ENSP00000354923,ENSP00000358921,ENSP00000360762,ENSP00000362924,ENSP00000376475,ENSP00000377789,ENSP00000379350,ENSP00000385636,ENSP00000431813,ENSP00000443495,ENSP00000455507,ENSP00000467141	ACTN2,ACTR1A,ANKRD1,CASQ2,CSRP3,DMD,DYNC1H1,GSN,ITGB1,KPNB1,MYH10,MYPN,OBSCN,OBSL1,PRKAR1A,SYNPO,SYNPO2,TPM1,TTN,TUBA4A,TUBB4B,YWHAE
GO:0051050	positive regulation of transport	26	892	0.00015	ENSP00000196371,ENSP00000264335,ENSP00000268150,ENSP00000269141,ENSP00000277865,ENSP00000336762,ENSP00000338345,ENSP00000348965,ENSP00000349320,ENSP00000352834,ENSP00000353590,ENSP00000354681,ENSP00000354923,ENSP00000360293,ENSP00000360762,ENSP00000362071,ENSP00000365663,ENSP00000369071,ENSP00000371267,ENSP00000377710,ENSP00000378199,ENSP00000379845,ENSP00000392330,ENSP00000437073,ENSP00000443495…	ABAT,ACTN2,ANG,ANKRD1,BCAP31,CACNA2D1,CDH2,DMD,DYNC1H1,FHL1,GLUD1,HSPA2,JPH2,MFGE8,MYH10,MYO18A,MYO1C,NPPA,OPA1,OXCT1,POSTN,SNCA,SORBS1,TTN,YWHAE,YWHAQ
GO:0061024	membrane organization	23	729	0.00016	ENSP00000218867,ENSP00000264335,ENSP00000268150,ENSP00000269141,ENSP00000290913,ENSP00000302961,ENSP00000309415,ENSP00000337838,ENSP00000338343,ENSP00000338345,ENSP00000353590,ENSP00000354681,ENSP00000360671,ENSP00000360882,ENSP00000362924,ENSP00000368678,ENSP00000371267,ENSP00000386881,ENSP00000398930,ENSP00000432083,ENSP00000437073,ENSP00000463393,ENSP00000479606	AGRN,CDH2,CHCHD6,CLTB,CLTC,COL5A1,DYSF,GSN,HSPA4,HSPA8,MFGE8,MYH10,MYO18A,OPA1,RTN4,SEC22B,SGCD,SGCE,SGCG,SLC25A5,SNCA,YWHAE,YWHAQ
GO:0070887	cellular response to chemical stimulus	53	2672	0.00017	ENSP00000052754,ENSP00000225964,ENSP00000247461,ENSP00000248553,ENSP00000261448,ENSP00000261883,ENSP00000261978,ENSP00000265131,ENSP00000296130,ENSP00000296658,ENSP00000297268,ENSP00000299767,ENSP00000300574,ENSP00000304408,ENSP00000304669,ENSP00000311905,ENSP00000316029,ENSP00000325527,ENSP00000327336,ENSP00000327801,ENSP00000336799,ENSP00000338345,ENSP00000343690,ENSP00000346839,ENSP00000347041…	ACTN2,AGRN,ANKRD1,ASPN,ATP1A2,ATP2B4,BGN,CA1,CACNA2D1,CANX,CASQ2,CILP,CLEC3B,CMBL,COL1A1,COL1A2,COL3A1,COL4A1,COL4A2,COL6A1,CRK,CTNNA1,DAG1,DCN,DPYSL3,FBN1,FMOD,FN1,FSCN1,GSN,HSP90B1,HSPA8,HSPB1,ITGB1,LTBP2,LTBP4,MYO1C,NCAM1,OPA1,P4HB,PFKP,POSTN,PRKAR1A,SLC25A5,SNCA,SOD3,SORBS1,SRM,TLN1,TNC,TPM1,TUBA1B,VIM
GO:0051641	cellular localization	46	2180	0.00018	ENSP00000211998,ENSP00000225964,ENSP00000237642,ENSP00000247461,ENSP00000248437,ENSP00000248553,ENSP00000261978,ENSP00000264335,ENSP00000269141,ENSP00000271064,ENSP00000284440,ENSP00000290158,ENSP00000295951,ENSP00000299767,ENSP00000300231,ENSP00000302961,ENSP00000304669,ENSP00000309415,ENSP00000310491,ENSP00000316029,ENSP00000336799,ENSP00000338345,ENSP00000341289,ENSP00000345008,ENSP00000348965…	ACTN2,ACTR1A,AGRN,ARHGAP1,ATP2B4,BCAP31,CACNA2D1,CANX,CDH2,CLTB,CLTC,COL1A1,CSRP3,CTNNA1,DAG1,DMD,DYNC1H1,FBLN5,GSN,HK1,HSP90B1,HSPA4,HSPA8,HSPB1,JPH2,KPNB1,LTBP2,MAP1A,MAP4,MYH10,MYO1C,OBSCN,OBSL1,OPA1,SEC22B,SLMAP,SNCA,STBD1,TINAGL1,TLN1,TUBA1B,TUBA4A,TUBB4B,UCHL1,VCL,YWHAE
GO:1903169	regulation of calcium ion transmembrane transport	10	146	0.0002	ENSP00000261448,ENSP00000264335,ENSP00000338345,ENSP00000349320,ENSP00000350132,ENSP00000354490,ENSP00000354923,ENSP00000362071,ENSP00000365663,ENSP00000378199	ATP1A2,CACNA2D1,CASQ2,DMD,HSPA2,JPH2,NPPA,PLN,SNCA,YWHAE
GO:0120036	plasma membrane bounded cell projection organization	28	1034	0.00023	ENSP00000211998,ENSP00000248437,ENSP00000262551,ENSP00000264059,ENSP00000264335,ENSP00000265131,ENSP00000284440,ENSP00000300231,ENSP00000304669,ENSP00000337838,ENSP00000341289,ENSP00000348965,ENSP00000351022,ENSP00000353375,ENSP00000353590,ENSP00000354923,ENSP00000357709,ENSP00000358921,ENSP00000362924,ENSP00000369071,ENSP00000371798,ENSP00000379350,ENSP00000388325,ENSP00000400365,ENSP00000410452…	ACTN2,ACTR1A,CTNNA1,DAG1,DMD,DYNC1H1,EFHD1,FSCN1,GSN,ITGB1,LAMA2,LAMB2,MAP1A,MAP4,MYH10,NCAM1,OGN,POSTN,RTN4,S100A6,STMN1,TNC,TPM1,TUBA4A,TUBB4B,UCHL1,VCL,YWHAE
GO:0030154	cell differentiation	63	3457	0.00025	ENSP00000211998,ENSP00000218867,ENSP00000225964,ENSP00000246792,ENSP00000251645,ENSP00000258341,ENSP00000261448,ENSP00000262551,ENSP00000264059,ENSP00000264335,ENSP00000265077,ENSP00000265131,ENSP00000269141,ENSP00000284440,ENSP00000304408,ENSP00000304669,ENSP00000325146,ENSP00000327145,ENSP00000333938,ENSP00000336762,ENSP00000337838,ENSP00000338343,ENSP00000343690,ENSP00000346839,ENSP00000347665…	ACTN1,ACTN2,AGRN,ANG,ANKRD1,CASQ2,CDH2,COL12A1,COL18A1,COL1A1,COL3A1,COL4A1,COL4A2,COL6A1,CSRP3,CTNNA1,DAG1,DMD,DPYSL3,EFHD1,FHL1,FLNC,FN1,GSN,HSPA2,HSPG2,ITGA7,ITGB1,KRT31,LAMA2,LAMB2,LAMC1,MAP4,MYH10,MYPN,NCAM1,NEXN,NPPA,OBSCN,OBSL1,OGN,OPA1,PDLIM5,POSTN,PRKAR1A,RRAS,RTN4,S100A6,SERPINE2,SERPINH1,SGCD,SGCG,SORBS2,STMN1,TGFBI,TNC,TPM1,TTN,UCHL1,VCAN,VCL,VIM,YWHAE
GO:0048518	positive regulation of biological process	88	5459	0.00025	ENSP00000052754,ENSP00000196371,ENSP00000217244,ENSP00000225964,ENSP00000246792,ENSP00000248553,ENSP00000256196,ENSP00000258341,ENSP00000261448,ENSP00000264036,ENSP00000264335,ENSP00000265131,ENSP00000266718,ENSP00000268150,ENSP00000269141,ENSP00000277865,ENSP00000284031,ENSP00000284322,ENSP00000296130,ENSP00000299767,ENSP00000300026,ENSP00000300231,ENSP00000300574,ENSP00000304408,ENSP00000304669…	ABAT,ABI3BP,ACTN1,ACTN2,AGRN,ANG,ANKRD1,ARHGAP1,ATP2B4,BCAP31,CACNA2D1,CASQ2,CDH2,CLEC3B,COL18A1,COL1A1,COL3A1,COMT,CRIP2,CRK,CSNK2A1,CSRP3,CTNNA1,DAG1,DCN,DDAH1,DMD,DPYSL3,DYNC1H1,DYNLT3,FAM129A,FBLN1,FBN1,FHL1,FN1,FSCN1,GLUD1,GSN,HSP90B1,HSPA2,HSPA8,HSPB1,HSPB6,ITGB1,JPH2,LAMA2,LAMC1,LUM,MAP1A,MCAM,MFGE8,MYH10,MYO18A,MYO1C,NES,NPPA,OBSCN,OBSL1,OPA1,OXCT1,P4HB,PDLIM1,POSTN,PPIB,PRKAR1A,RRAS,RRAS…
GO:0048869	cellular developmental process	64	3533	0.00025	ENSP00000211998,ENSP00000218867,ENSP00000225964,ENSP00000246792,ENSP00000251645,ENSP00000258341,ENSP00000261448,ENSP00000262551,ENSP00000264059,ENSP00000264335,ENSP00000265077,ENSP00000265131,ENSP00000269141,ENSP00000284440,ENSP00000304408,ENSP00000304669,ENSP00000325146,ENSP00000327145,ENSP00000333938,ENSP00000336762,ENSP00000337838,ENSP00000338343,ENSP00000343690,ENSP00000343924,ENSP00000346839…	ACTN1,ACTN2,AGRN,ANG,ANKRD1,CASQ2,CDH2,COL12A1,COL18A1,COL1A1,COL3A1,COL4A1,COL4A2,COL6A1,CSRP3,CTNNA1,DAG1,DMD,DPYSL3,EFHD1,FHL1,FLNC,FN1,GSN,HSPA2,HSPG2,ITGA7,ITGB1,KRT31,LAMA2,LAMB2,LAMC1,MAP4,MYH10,MYPN,NCAM1,NEXN,NPPA,OBSCN,OBSL1,OGN,OPA1,PDLIM5,POSTN,PRELP,PRKAR1A,RRAS,RTN4,S100A6,SERPINE2,SERPINH1,SGCD,SGCG,SORBS2,STMN1,TGFBI,TNC,TPM1,TTN,UCHL1,VCAN,VCL,VIM,YWHAE
GO:0061077	chaperone-mediated protein folding	7	63	0.00027	ENSP00000216218,ENSP00000217244,ENSP00000247461,ENSP00000248553,ENSP00000300026,ENSP00000432083,ENSP00000468057	CANX,CSNK2A1,HSPA8,HSPB1,HSPB6,PPIB,ST13
GO:0006986	response to unfolded protein	10	153	0.00028	ENSP00000248553,ENSP00000299767,ENSP00000302476,ENSP00000302961,ENSP00000316029,ENSP00000339730,ENSP00000359799,ENSP00000378199,ENSP00000432083,ENSP00000434412	DNAJB4,HSP90B1,HSPA2,HSPA4,HSPA8,HSPB1,HSPB2,SERPINH1,THBS4,TLN1
GO:0051179	localization	85	5233	0.00029	ENSP00000211998,ENSP00000216962,ENSP00000217971,ENSP00000224807,ENSP00000225964,ENSP00000227525,ENSP00000237642,ENSP00000247461,ENSP00000248437,ENSP00000248553,ENSP00000258341,ENSP00000261448,ENSP00000261978,ENSP00000262418,ENSP00000264335,ENSP00000265077,ENSP00000268150,ENSP00000269141,ENSP00000271064,ENSP00000284440,ENSP00000285381,ENSP00000290158,ENSP00000295951,ENSP00000296130,ENSP00000297268…	ACTN1,ACTN2,ACTR1A,AGRN,ANG,ARHGAP1,ATP1A2,ATP2B4,BCAP31,CA1,CA3,CACNA2D1,CANX,CASQ2,CDH2,CLEC3B,CLTB,CLTC,COL1A1,COL1A2,COL5A1,CRK,CSRP3,CTNNA1,CYB5R3,DAG1,DMD,DYNC1H1,DYSF,FBLN5,FBN1,FN1,FSCN1,GSN,HBD,HK1,HSP90B1,HSPA4,HSPA8,HSPB1,HSPG2,ITGB1,JPH2,KPNB1,LAMC1,LTBP2,LTBP4,MAP1A,MAP4,MFGE8,MYH10,MYO18A,MYO1C,OBSCN,OBSL1,OPA1,PGRMC1,PLN,PYGB,RAB24,RTN4,S100A6,SEC22B,SERINC1,SERPINE2,SFXN3,SLC25A5,…
GO:1901700	response to oxygen-containing compound	34	1427	0.00031	ENSP00000052754,ENSP00000196371,ENSP00000225964,ENSP00000265131,ENSP00000285381,ENSP00000297268,ENSP00000299767,ENSP00000300527,ENSP00000300574,ENSP00000304408,ENSP00000304669,ENSP00000325527,ENSP00000338345,ENSP00000347665,ENSP00000349320,ENSP00000350132,ENSP00000350310,ENSP00000351022,ENSP00000354490,ENSP00000354511,ENSP00000354681,ENSP00000355180,ENSP00000360293,ENSP00000360762,ENSP00000362924…	ABAT,ACTN2,AGRN,ANKRD1,ATP1A2,ATP2B4,CA3,CACNA2D1,COL18A1,COL1A1,COL1A2,COL3A1,COL4A1,COL6A1,COL6A2,COMT,CRK,CTNNA1,DAG1,DCN,FBN1,GSN,HSP90B1,NPPA,OPA1,OXCT1,PLN,POSTN,PRKAR1A,SNCA,SOD3,SORBS1,TNC,TPM1
GO:0006937	regulation of muscle contraction	10	156	0.00032	ENSP00000261448,ENSP00000347507,ENSP00000350132,ENSP00000351022,ENSP00000354490,ENSP00000354923,ENSP00000365663,ENSP00000379210,ENSP00000379845,ENSP00000468057	ABAT,ATP1A2,CASQ2,DMD,HSPB6,MYH7,MYL3,NPPA,PLN,TPM1
GO:0048747	muscle fiber development	6	43	0.00035	ENSP00000284440,ENSP00000327145,ENSP00000333938,ENSP00000351790,ENSP00000354923,ENSP00000467141	DMD,FLNC,MYPN,NEXN,TTN,UCHL1
GO:0070848	response to growth factor	18	507	0.00035	ENSP00000225964,ENSP00000248553,ENSP00000261883,ENSP00000261978,ENSP00000265131,ENSP00000266718,ENSP00000296130,ENSP00000297268,ENSP00000300574,ENSP00000304408,ENSP00000311905,ENSP00000325527,ENSP00000338345,ENSP00000347041,ENSP00000352834,ENSP00000353654,ENSP00000360762,ENSP00000369071	ANKRD1,CILP,CLEC3B,COL1A1,COL1A2,COL3A1,COL4A2,CRK,FBN1,FMOD,HSPB1,LTBP2,LTBP4,LUM,MYO1C,POSTN,SNCA,TNC
GO:0002027	regulation of heart rate	8	95	0.00038	ENSP00000261448,ENSP00000264335,ENSP00000347507,ENSP00000349320,ENSP00000350132,ENSP00000351022,ENSP00000354923,ENSP00000365663	CACNA2D1,CASQ2,DMD,MYH7,NPPA,PLN,TPM1,YWHAE
GO:0044057	regulation of system process	18	516	0.00043	ENSP00000261448,ENSP00000264335,ENSP00000347507,ENSP00000349320,ENSP00000350132,ENSP00000350310,ENSP00000351022,ENSP00000354490,ENSP00000354511,ENSP00000354923,ENSP00000356515,ENSP00000363071,ENSP00000365663,ENSP00000379210,ENSP00000379845,ENSP00000431813,ENSP00000442600,ENSP00000468057	ABAT,ATP1A2,ATP2B4,CACNA2D1,CASQ2,COMT,CSRP3,DAG1,DES,DMD,HSPB6,MYH7,MYL3,NPPA,PLN,TPM1,UTRN,YWHAE
GO:0032880	regulation of protein localization	25	901	0.00045	ENSP00000196371,ENSP00000264335,ENSP00000269141,ENSP00000277865,ENSP00000300231,ENSP00000331544,ENSP00000336762,ENSP00000337838,ENSP00000346839,ENSP00000352834,ENSP00000353590,ENSP00000360293,ENSP00000360671,ENSP00000360762,ENSP00000362924,ENSP00000369071,ENSP00000371267,ENSP00000379350,ENSP00000379845,ENSP00000392330,ENSP00000432083,ENSP00000437073,ENSP00000443495,ENSP00000467141,ENSP00000479606	ABAT,ACTN2,ANG,ANKRD1,BCAP31,CDH2,CLTC,FBLN1,FN1,GLUD1,GSN,HSPA8,ITGB1,MAP1A,MYH10,MYO18A,MYO1C,OXCT1,POSTN,RTN4,SLC25A5,SORBS1,TTN,YWHAE,YWHAQ
GO:0034762	regulation of transmembrane transport	18	524	0.00052	ENSP00000227525,ENSP00000261448,ENSP00000264335,ENSP00000295951,ENSP00000338345,ENSP00000349320,ENSP00000350132,ENSP00000350310,ENSP00000354490,ENSP00000354681,ENSP00000354923,ENSP00000356515,ENSP00000360293,ENSP00000362071,ENSP00000365663,ENSP00000377710,ENSP00000378199,ENSP00000443495	ACTN2,ATP1A2,ATP2B4,CACNA2D1,CASQ2,DMD,FHL1,HSPA2,JPH2,NPPA,OPA1,PLN,SLMAP,SNCA,SORBS1,TMEM109,UTRN,YWHAE
GO:0042340	keratan sulfate catabolic process	4	12	0.00053	ENSP00000262551,ENSP00000266718,ENSP00000343924,ENSP00000347041	FMOD,LUM,OGN,PRELP
GO:0045216	cell-cell junction organization	10	168	0.00054	ENSP00000211998,ENSP00000269141,ENSP00000304669,ENSP00000316029,ENSP00000336762,ENSP00000360293,ENSP00000371798,ENSP00000377941,ENSP00000386840,ENSP00000443495	ACTN1,ACTN2,ANG,CDH2,CTNNA1,FSCN1,SORBS1,TLN1,VCL,XIRP2
GO:0034097	response to cytokine	27	1035	0.00056	ENSP00000052754,ENSP00000225964,ENSP00000247461,ENSP00000297268,ENSP00000299767,ENSP00000300574,ENSP00000304408,ENSP00000327336,ENSP00000327801,ENSP00000336799,ENSP00000338345,ENSP00000343690,ENSP00000346839,ENSP00000352834,ENSP00000360671,ENSP00000360762,ENSP00000362924,ENSP00000364694,ENSP00000366156,ENSP00000369071,ENSP00000370517,ENSP00000371798,ENSP00000379350,ENSP00000430656,ENSP00000432083…	ANKRD1,ASPN,BGN,CA1,CANX,COL1A1,COL1A2,COL3A1,CRK,DCN,DPYSL3,FN1,FSCN1,GSN,HSP90B1,HSPA8,ITGB1,MYO1C,NCAM1,P4HB,PFKP,POSTN,SLC25A5,SNCA,SRM,TUBA1B,VIM
GO:0006950	response to stress	59	3267	0.00062	ENSP00000052754,ENSP00000196371,ENSP00000203630,ENSP00000225964,ENSP00000227525,ENSP00000248553,ENSP00000264036,ENSP00000264335,ENSP00000265131,ENSP00000284440,ENSP00000285381,ENSP00000290913,ENSP00000297268,ENSP00000299767,ENSP00000300574,ENSP00000302476,ENSP00000302961,ENSP00000304408,ENSP00000304669,ENSP00000316029,ENSP00000327801,ENSP00000331544,ENSP00000336762,ENSP00000338345,ENSP00000339730…	ABAT,ANG,ANKRD1,ATP2B4,CA3,CHCHD6,COL18A1,COL1A1,COL1A2,COL3A1,COL5A1,COMT,CRK,CTNNA1,DAG1,DCN,DNAJB4,DPYSL3,DYSF,FAM129A,FBLN1,FN1,GSN,HBD,HSP90B1,HSPA2,HSPA4,HSPA8,HSPB1,HSPB2,HSPG2,ITGB1,LAMB2,MCAM,MLF2,MYH10,MYH7,MYO1C,NCAM1,NPPA,OPA1,OXCT1,P4HB,PDLIM1,POSTN,PRKAR1A,SERPINE2,SERPINH1,SNCA,SOD3,THBS4,TLN1,TMEM109,TNC,TPM1,TUBB4B,UCHL1,VIM,YWHAE
GO:0034332	adherens junction organization	7	74	0.00062	ENSP00000211998,ENSP00000269141,ENSP00000304669,ENSP00000336762,ENSP00000360293,ENSP00000377941,ENSP00000443495	ACTN1,ACTN2,ANG,CDH2,CTNNA1,SORBS1,VCL
GO:0060415	muscle tissue morphogenesis	7	74	0.00062	ENSP00000304408,ENSP00000347507,ENSP00000351022,ENSP00000360762,ENSP00000379210,ENSP00000386840,ENSP00000467141	ANKRD1,COL3A1,MYH7,MYL3,TPM1,TTN,XIRP2
GO:0034765	regulation of ion transmembrane transport	16	434	0.00064	ENSP00000227525,ENSP00000261448,ENSP00000264335,ENSP00000295951,ENSP00000338345,ENSP00000349320,ENSP00000350132,ENSP00000350310,ENSP00000354490,ENSP00000354923,ENSP00000356515,ENSP00000362071,ENSP00000365663,ENSP00000377710,ENSP00000378199,ENSP00000443495	ACTN2,ATP1A2,ATP2B4,CACNA2D1,CASQ2,DMD,FHL1,HSPA2,JPH2,NPPA,PLN,SLMAP,SNCA,TMEM109,UTRN,YWHAE
GO:0071495	cellular response to endogenous stimulus	28	1106	0.00064	ENSP00000225964,ENSP00000261448,ENSP00000261883,ENSP00000261978,ENSP00000265131,ENSP00000296130,ENSP00000297268,ENSP00000299767,ENSP00000300574,ENSP00000304408,ENSP00000304669,ENSP00000311905,ENSP00000325527,ENSP00000338345,ENSP00000347041,ENSP00000349320,ENSP00000350310,ENSP00000353654,ENSP00000354490,ENSP00000354681,ENSP00000355180,ENSP00000360293,ENSP00000360762,ENSP00000364979,ENSP00000368678…	ACTN2,AGRN,ANKRD1,ATP1A2,ATP2B4,CACNA2D1,CASQ2,CILP,CLEC3B,COL1A1,COL1A2,COL3A1,COL4A1,COL4A2,COL6A1,CRK,CTNNA1,FBN1,FMOD,HSP90B1,LTBP2,LTBP4,OPA1,POSTN,PRKAR1A,SNCA,SORBS1,TNC
GO:0071417	cellular response to organonitrogen compound	17	485	0.00065	ENSP00000225964,ENSP00000261448,ENSP00000297268,ENSP00000299767,ENSP00000300574,ENSP00000304408,ENSP00000304669,ENSP00000325527,ENSP00000338345,ENSP00000349320,ENSP00000350310,ENSP00000354681,ENSP00000355180,ENSP00000360293,ENSP00000364979,ENSP00000376475,ENSP00000443495	ACTN2,ATP2B4,CACNA2D1,CASQ2,COL1A1,COL1A2,COL3A1,COL4A1,COL6A1,CRK,CTNNA1,FBN1,HSP90B1,OPA1,PRKAR1A,SNCA,SORBS1
GO:0016192	vesicle-mediated transport	37	1699	0.00073	ENSP00000211998,ENSP00000216962,ENSP00000217971,ENSP00000237642,ENSP00000247461,ENSP00000248437,ENSP00000268150,ENSP00000271064,ENSP00000290158,ENSP00000296130,ENSP00000299767,ENSP00000300574,ENSP00000304376,ENSP00000309415,ENSP00000310491,ENSP00000316029,ENSP00000338345,ENSP00000341289,ENSP00000346839,ENSP00000348965,ENSP00000352834,ENSP00000353590,ENSP00000354468,ENSP00000355330,ENSP00000358921…	ACTN1,ACTN2,ACTR1A,ARHGAP1,BCAP31,CANX,CLEC3B,CLTB,CLTC,CRK,CYB5R3,DYNC1H1,DYSF,FN1,GSN,HSP90B1,HSPA8,HSPG2,ITGB1,KPNB1,MFGE8,MYH10,MYO18A,MYO1C,PGRMC1,PYGB,RAB24,SEC22B,SNCA,STBD1,TGM2,TINAGL1,TLN1,TTN,TUBA4A,TUBB4B,VCL
GO:0043933	protein-containing complex subunit organization	38	1770	0.00076	ENSP00000216218,ENSP00000225964,ENSP00000258341,ENSP00000261448,ENSP00000266718,ENSP00000297268,ENSP00000297848,ENSP00000300527,ENSP00000300574,ENSP00000302961,ENSP00000304408,ENSP00000304669,ENSP00000316029,ENSP00000325146,ENSP00000327801,ENSP00000336762,ENSP00000337838,ENSP00000343690,ENSP00000346839,ENSP00000347041,ENSP00000348965,ENSP00000350132,ENSP00000354681,ENSP00000354923,ENSP00000355180…	ACTN2,ANG,CASQ2,CLTC,COL12A1,COL14A1,COL1A1,COL1A2,COL3A1,COL5A1,COL6A1,COL6A2,CRK,CTNNA1,DMD,DPT,DPYSL3,DYNC1H1,FMOD,FN1,GSN,HSPA4,HSPA8,LAMC1,LUM,OBSL1,OPA1,P4HB,PLN,RTN4,SEC22B,SERPINH1,ST13,STMN1,TGM2,TLN1,TNXB,TTN
GO:0060341	regulation of cellular localization	22	766	0.00081	ENSP00000196371,ENSP00000261448,ENSP00000264335,ENSP00000269141,ENSP00000300231,ENSP00000310491,ENSP00000337838,ENSP00000338345,ENSP00000348965,ENSP00000350132,ENSP00000352834,ENSP00000354490,ENSP00000354923,ENSP00000360293,ENSP00000362071,ENSP00000362924,ENSP00000365663,ENSP00000371267,ENSP00000379350,ENSP00000392330,ENSP00000443495,ENSP00000479606	ACTN2,ARHGAP1,ATP1A2,BCAP31,CASQ2,CDH2,CLTC,DMD,DYNC1H1,GSN,ITGB1,JPH2,MAP1A,MYO1C,NPPA,OXCT1,PLN,RTN4,SNCA,SORBS1,YWHAE,YWHAQ
GO:0070208	protein heterotrimerization	4	14	0.00081	ENSP00000225964,ENSP00000297268,ENSP00000300527,ENSP00000355180	COL1A1,COL1A2,COL6A1,COL6A2
GO:0007017	microtubule-based process	19	605	0.0009	ENSP00000248437,ENSP00000248553,ENSP00000284440,ENSP00000290158,ENSP00000300231,ENSP00000318697,ENSP00000336799,ENSP00000341289,ENSP00000347507,ENSP00000348965,ENSP00000352834,ENSP00000353375,ENSP00000353590,ENSP00000354681,ENSP00000369703,ENSP00000385636,ENSP00000410452,ENSP00000437073,ENSP00000442600	DAG1,DYNC1H1,HSPB1,KPNB1,MAP1A,MAP4,MYH10,MYH7,MYO18A,MYO1C,OBSL1,OPA1,STMN1,TUBA1B,TUBA4A,TUBB2A,TUBB4B,TUBB6,UCHL1
GO:0071345	cellular response to cytokine stimulus	25	953	0.00097	ENSP00000052754,ENSP00000225964,ENSP00000247461,ENSP00000297268,ENSP00000299767,ENSP00000300574,ENSP00000327336,ENSP00000327801,ENSP00000336799,ENSP00000343690,ENSP00000346839,ENSP00000352834,ENSP00000360671,ENSP00000360762,ENSP00000362924,ENSP00000364694,ENSP00000366156,ENSP00000369071,ENSP00000370517,ENSP00000371798,ENSP00000379350,ENSP00000430656,ENSP00000432083,ENSP00000446007,ENSP00000480132	ANKRD1,ASPN,BGN,CA1,CANX,COL1A1,COL1A2,CRK,DCN,DPYSL3,FN1,FSCN1,GSN,HSP90B1,HSPA8,ITGB1,MYO1C,NCAM1,P4HB,PFKP,POSTN,SLC25A5,SRM,TUBA1B,VIM
GO:0055003	cardiac myofibril assembly	4	16	0.0012	ENSP00000353590,ENSP00000385636,ENSP00000431813,ENSP00000467141	CSRP3,MYH10,OBSL1,TTN
GO:0071711	basement membrane organization	4	16	0.0012	ENSP00000216286,ENSP00000364979,ENSP00000379350,ENSP00000442600	COL4A1,DAG1,ITGB1,NID2
GO:1901699	cellular response to nitrogen compound	18	568	0.0012	ENSP00000225964,ENSP00000261448,ENSP00000297268,ENSP00000299767,ENSP00000300574,ENSP00000304408,ENSP00000304669,ENSP00000325527,ENSP00000338345,ENSP00000349320,ENSP00000350310,ENSP00000354681,ENSP00000355180,ENSP00000360293,ENSP00000364979,ENSP00000368678,ENSP00000376475,ENSP00000443495	ACTN2,AGRN,ATP2B4,CACNA2D1,CASQ2,COL1A1,COL1A2,COL3A1,COL4A1,COL6A1,CRK,CTNNA1,FBN1,HSP90B1,OPA1,PRKAR1A,SNCA,SORBS1
GO:0048588	developmental cell growth	7	85	0.0013	ENSP00000211998,ENSP00000347852,ENSP00000365663,ENSP00000369071,ENSP00000379350,ENSP00000388325,ENSP00000480359	ITGB1,LAMB2,NPPA,PDLIM5,POSTN,SORBS2,VCL
GO:0006942	regulation of striated muscle contraction	7	88	0.0015	ENSP00000261448,ENSP00000347507,ENSP00000350132,ENSP00000354490,ENSP00000354923,ENSP00000365663,ENSP00000379210	ATP1A2,CASQ2,DMD,MYH7,MYL3,NPPA,PLN
GO:0071230	cellular response to amino acid stimulus	6	60	0.0016	ENSP00000225964,ENSP00000297268,ENSP00000304408,ENSP00000354681,ENSP00000355180,ENSP00000364979	COL1A1,COL1A2,COL3A1,COL4A1,COL6A1,OPA1
GO:0031103	axon regeneration	4	18	0.0017	ENSP00000265131,ENSP00000304669,ENSP00000388325,ENSP00000442600	CTNNA1,DAG1,LAMB2,TNC
GO:0051239	regulation of multicellular organismal process	51	2788	0.0017	ENSP00000052754,ENSP00000225964,ENSP00000246792,ENSP00000248553,ENSP00000261448,ENSP00000264335,ENSP00000266718,ENSP00000269141,ENSP00000284031,ENSP00000300026,ENSP00000304408,ENSP00000304669,ENSP00000325527,ENSP00000331544,ENSP00000337838,ENSP00000338345,ENSP00000339730,ENSP00000343690,ENSP00000346839,ENSP00000347507,ENSP00000349320,ENSP00000350132,ENSP00000350310,ENSP00000351022,ENSP00000353654…	ABAT,AGRN,ANKRD1,ASPN,ATP1A2,ATP2B4,CACNA2D1,CASQ2,CDH2,CLTC,COL1A1,COL3A1,COL4A2,COL5A1,COMT,CSRP3,CTNNA1,DAG1,DCN,DDAH1,DES,DMD,DPYSL3,FBLN1,FBN1,FN1,HSPB1,HSPB6,HSPG2,ITGB1,JPH2,LAMA2,LUM,MYH7,MYL3,NPPA,OBSL1,OPA1,PDLIM5,PLN,POSTN,PPIB,RRAS,RTN4,SERPINE2,SNCA,THBS4,TPM1,UTRN,VIM,YWHAE
GO:0051493	regulation of cytoskeleton organization	16	477	0.0017	ENSP00000300574,ENSP00000306015,ENSP00000333938,ENSP00000338345,ENSP00000348965,ENSP00000351022,ENSP00000351790,ENSP00000352834,ENSP00000357206,ENSP00000362924,ENSP00000371798,ENSP00000377789,ENSP00000378289,ENSP00000410452,ENSP00000443495,ENSP00000479606	ACTN2,CLTC,CRK,DYNC1H1,FSCN1,GSN,MYO1C,MYPN,NES,NEXN,SNCA,STMN1,SYNPO,SYNPO2,SYNPO2L,TPM1
GO:0061564	axon development	14	377	0.0017	ENSP00000211998,ENSP00000262551,ENSP00000265131,ENSP00000284440,ENSP00000304669,ENSP00000337838,ENSP00000353590,ENSP00000357709,ENSP00000379350,ENSP00000388325,ENSP00000400365,ENSP00000410452,ENSP00000442600,ENSP00000480132	CTNNA1,DAG1,ITGB1,LAMA2,LAMB2,MYH10,NCAM1,OGN,RTN4,S100A6,STMN1,TNC,UCHL1,VCL
GO:0071363	cellular response to growth factor stimulus	16	477	0.0017	ENSP00000225964,ENSP00000248553,ENSP00000261883,ENSP00000261978,ENSP00000296130,ENSP00000297268,ENSP00000300574,ENSP00000304408,ENSP00000311905,ENSP00000325527,ENSP00000338345,ENSP00000347041,ENSP00000352834,ENSP00000353654,ENSP00000360762,ENSP00000369071	ANKRD1,CILP,CLEC3B,COL1A1,COL1A2,COL3A1,COL4A2,CRK,FBN1,FMOD,HSPB1,LTBP2,LTBP4,MYO1C,POSTN,SNCA
GO:0010243	response to organonitrogen compound	23	876	0.0018	ENSP00000225964,ENSP00000261448,ENSP00000297268,ENSP00000299767,ENSP00000300574,ENSP00000304408,ENSP00000304669,ENSP00000325527,ENSP00000338345,ENSP00000349320,ENSP00000350132,ENSP00000350310,ENSP00000354681,ENSP00000355180,ENSP00000360293,ENSP00000362924,ENSP00000364979,ENSP00000365663,ENSP00000376475,ENSP00000379350,ENSP00000379845,ENSP00000442600,ENSP00000443495	ABAT,ACTN2,ATP2B4,CACNA2D1,CASQ2,COL1A1,COL1A2,COL3A1,COL4A1,COL6A1,CRK,CTNNA1,DAG1,FBN1,GSN,HSP90B1,ITGB1,NPPA,OPA1,PLN,PRKAR1A,SNCA,SORBS1
GO:0048514	blood vessel morphogenesis	14	381	0.0018	ENSP00000264036,ENSP00000268150,ENSP00000269141,ENSP00000304408,ENSP00000336762,ENSP00000337838,ENSP00000346839,ENSP00000347665,ENSP00000353654,ENSP00000363827,ENSP00000364979,ENSP00000379350,ENSP00000416330,ENSP00000442600	ANG,CDH2,COL18A1,COL3A1,COL4A1,COL4A2,DAG1,FN1,HSPG2,ITGB1,MCAM,MFGE8,RTN4,TGFBI
GO:0010881	regulation of cardiac muscle contraction by regulation of the release of sequestered calcium ion	4	19	0.0019	ENSP00000261448,ENSP00000350132,ENSP00000354490,ENSP00000354923	ATP1A2,CASQ2,DMD,PLN
GO:0055008	cardiac muscle tissue morphogenesis	6	63	0.0019	ENSP00000347507,ENSP00000351022,ENSP00000360762,ENSP00000379210,ENSP00000386840,ENSP00000467141	ANKRD1,MYH7,MYL3,TPM1,TTN,XIRP2
GO:0032970	regulation of actin filament-based process	13	338	0.002	ENSP00000300574,ENSP00000306015,ENSP00000350132,ENSP00000351022,ENSP00000352834,ENSP00000354490,ENSP00000362924,ENSP00000371798,ENSP00000377789,ENSP00000378289,ENSP00000410452,ENSP00000431813,ENSP00000443495	ACTN2,ATP1A2,CRK,CSRP3,FSCN1,GSN,MYO1C,PLN,STMN1,SYNPO,SYNPO2,SYNPO2L,TPM1
GO:0033239	negative regulation of cellular amine metabolic process	3	6	0.002	ENSP00000338345,ENSP00000350310,ENSP00000354511	ATP2B4,COMT,SNCA
GO:0002576	platelet degranulation	8	129	0.0022	ENSP00000211998,ENSP00000248437,ENSP00000296130,ENSP00000316029,ENSP00000346839,ENSP00000377941,ENSP00000443495,ENSP00000467141	ACTN1,ACTN2,CLEC3B,FN1,TLN1,TTN,TUBA4A,VCL
GO:0048522	positive regulation of cellular process	77	4898	0.0023	ENSP00000052754,ENSP00000196371,ENSP00000217244,ENSP00000225964,ENSP00000248553,ENSP00000256196,ENSP00000258341,ENSP00000261448,ENSP00000264036,ENSP00000264335,ENSP00000265131,ENSP00000266718,ENSP00000268150,ENSP00000269141,ENSP00000277865,ENSP00000284031,ENSP00000296130,ENSP00000300574,ENSP00000304408,ENSP00000304669,ENSP00000306015,ENSP00000310491,ENSP00000325527,ENSP00000331544,ENSP00000336762…	ABAT,ACTN1,ACTN2,AGRN,ANG,ANKRD1,ARHGAP1,ATP2B4,BCAP31,CASQ2,CDH2,CLEC3B,COL18A1,COL1A1,COL3A1,COMT,CRIP2,CRK,CSNK2A1,CSRP3,CTNNA1,DAG1,DCN,DDAH1,DMD,DPYSL3,DYNC1H1,DYNLT3,FAM129A,FBLN1,FBN1,FN1,FSCN1,GLUD1,GSN,HSPA2,HSPA8,HSPB1,ITGB1,JPH2,LAMA2,LAMC1,LUM,MCAM,MFGE8,MYH10,MYO18A,MYO1C,NES,NPPA,OBSCN,OBSL1,OPA1,OXCT1,PDLIM1,POSTN,PRKAR1A,RRAS2,RTN4,S100A6,SERPINE2,SLC25A5,SNCA,SORBS1,STMN1,SVIL,SY…
GO:0001525	angiogenesis	12	297	0.0024	ENSP00000264036,ENSP00000268150,ENSP00000336762,ENSP00000337838,ENSP00000346839,ENSP00000347665,ENSP00000353654,ENSP00000363827,ENSP00000364979,ENSP00000379350,ENSP00000416330,ENSP00000442600	ANG,COL18A1,COL4A1,COL4A2,DAG1,FN1,HSPG2,ITGB1,MCAM,MFGE8,RTN4,TGFBI
GO:0022603	regulation of anatomical structure morphogenesis	24	961	0.0025	ENSP00000052754,ENSP00000246792,ENSP00000248553,ENSP00000284031,ENSP00000300574,ENSP00000331544,ENSP00000337838,ENSP00000339730,ENSP00000346839,ENSP00000351022,ENSP00000353590,ENSP00000353654,ENSP00000354681,ENSP00000360882,ENSP00000363827,ENSP00000364694,ENSP00000369071,ENSP00000379350,ENSP00000385636,ENSP00000442600,ENSP00000452120,ENSP00000468057,ENSP00000479606,ENSP00000480359	ASPN,CLTC,COL4A2,COL5A1,CRK,DAG1,DCN,DDAH1,FBLN1,FN1,HSPB1,HSPB6,HSPG2,ITGA7,ITGB1,MYH10,OBSL1,OPA1,PDLIM5,POSTN,RRAS,RTN4,THBS4,TPM1
GO:0035987	endodermal cell differentiation	5	41	0.0025	ENSP00000325146,ENSP00000346839,ENSP00000353654,ENSP00000355180,ENSP00000452120	COL12A1,COL4A2,COL6A1,FN1,ITGA7
GO:0043269	regulation of ion transport	18	618	0.003	ENSP00000227525,ENSP00000261448,ENSP00000264335,ENSP00000295951,ENSP00000338345,ENSP00000349320,ENSP00000350132,ENSP00000350310,ENSP00000354490,ENSP00000354923,ENSP00000356515,ENSP00000362071,ENSP00000365663,ENSP00000377710,ENSP00000378199,ENSP00000379845,ENSP00000415786,ENSP00000443495	ABAT,ACTN2,ATP1A2,ATP2B4,CACNA2D1,CASQ2,DMD,FHL1,HSPA2,JPH2,NPPA,PLN,SERPINE2,SLMAP,SNCA,TMEM109,UTRN,YWHAE
GO:0048678	response to axon injury	5	43	0.003	ENSP00000265131,ENSP00000304669,ENSP00000343690,ENSP00000388325,ENSP00000442600	CTNNA1,DAG1,DPYSL3,LAMB2,TNC
GO:0007399	nervous system development	42	2206	0.0033	ENSP00000196371,ENSP00000211998,ENSP00000262506,ENSP00000262551,ENSP00000264059,ENSP00000264335,ENSP00000265077,ENSP00000265131,ENSP00000269141,ENSP00000274341,ENSP00000284440,ENSP00000304408,ENSP00000304669,ENSP00000337838,ENSP00000343690,ENSP00000345774,ENSP00000346839,ENSP00000350310,ENSP00000353375,ENSP00000353590,ENSP00000354681,ENSP00000354923,ENSP00000357206,ENSP00000357709,ENSP00000360762…	ABAT,AGRN,ALDH3A2,ANKRD1,ATP2B4,CDH2,COL3A1,COL4A1,CSNK2A2,CTNNA1,DAG1,DMD,DPYSL3,EFHD1,FN1,GSN,HAPLN1,HSPG2,ITGB1,LAMA2,LAMB2,MAP4,MYH10,NCAM1,NES,OBSL1,OGN,OPA1,OXCT1,PDLIM5,POSTN,PRPS1,RTN4,S100A6,SERPINE2,STMN1,TNC,UCHL1,VCAN,VCL,VIM,YWHAE
GO:0030155	regulation of cell adhesion	18	623	0.0033	ENSP00000225964,ENSP00000265131,ENSP00000284322,ENSP00000300574,ENSP00000331544,ENSP00000346839,ENSP00000351022,ENSP00000355330,ENSP00000356515,ENSP00000362924,ENSP00000369071,ENSP00000376475,ENSP00000378769,ENSP00000379845,ENSP00000400365,ENSP00000415786,ENSP00000416330,ENSP00000442600	ABAT,ABI3BP,COL1A1,CRK,DAG1,FBLN1,FN1,GSN,LAMA2,POSTN,PPP1CB,PRKAR1A,SERPINE2,TGFBI,TGM2,TNC,TPM1,UTRN
GO:0009887	animal organ morphogenesis	22	865	0.0035	ENSP00000052754,ENSP00000225964,ENSP00000265131,ENSP00000269141,ENSP00000297268,ENSP00000304408,ENSP00000304669,ENSP00000325527,ENSP00000337838,ENSP00000347507,ENSP00000347665,ENSP00000351022,ENSP00000355330,ENSP00000360762,ENSP00000360882,ENSP00000364685,ENSP00000377710,ENSP00000379210,ENSP00000386840,ENSP00000434412,ENSP00000442600,ENSP00000467141	ANKRD1,CDH2,COL18A1,COL1A1,COL1A2,COL3A1,COL5A1,CTNNA1,DAG1,DCN,FBN1,FHL1,MFAP2,MYH7,MYL3,RTN4,SERPINH1,TGM2,TNC,TPM1,TTN,XIRP2
GO:0032964	collagen biosynthetic process	3	8	0.0035	ENSP00000225964,ENSP00000360882,ENSP00000434412	COL1A1,COL5A1,SERPINH1
GO:0048739	cardiac muscle fiber development	3	8	0.0035	ENSP00000333938,ENSP00000351790,ENSP00000467141	MYPN,NEXN,TTN
GO:0061049	cell growth involved in cardiac muscle cell development	3	8	0.0035	ENSP00000347852,ENSP00000365663,ENSP00000480359	NPPA,PDLIM5,SORBS2
GO:1901698	response to nitrogen compound	24	988	0.0035	ENSP00000225964,ENSP00000261448,ENSP00000297268,ENSP00000299767,ENSP00000300574,ENSP00000304408,ENSP00000304669,ENSP00000325527,ENSP00000338345,ENSP00000349320,ENSP00000350132,ENSP00000350310,ENSP00000354681,ENSP00000355180,ENSP00000360293,ENSP00000362924,ENSP00000364979,ENSP00000365663,ENSP00000368678,ENSP00000376475,ENSP00000379350,ENSP00000379845,ENSP00000442600,ENSP00000443495	ABAT,ACTN2,AGRN,ATP2B4,CACNA2D1,CASQ2,COL1A1,COL1A2,COL3A1,COL4A1,COL6A1,CRK,CTNNA1,DAG1,FBN1,GSN,HSP90B1,ITGB1,NPPA,OPA1,PLN,PRKAR1A,SNCA,SORBS1
GO:0022008	neurogenesis	32	1519	0.0038	ENSP00000211998,ENSP00000262551,ENSP00000264059,ENSP00000264335,ENSP00000265077,ENSP00000265131,ENSP00000269141,ENSP00000284440,ENSP00000304408,ENSP00000304669,ENSP00000337838,ENSP00000343690,ENSP00000346839,ENSP00000353375,ENSP00000353590,ENSP00000354681,ENSP00000354923,ENSP00000357709,ENSP00000360762,ENSP00000362924,ENSP00000368678,ENSP00000369071,ENSP00000379350,ENSP00000385636,ENSP00000388325…	AGRN,ANKRD1,CDH2,COL3A1,CTNNA1,DAG1,DMD,DPYSL3,EFHD1,FN1,GSN,ITGB1,LAMA2,LAMB2,MAP4,MYH10,NCAM1,OBSL1,OGN,OPA1,PDLIM5,POSTN,RTN4,S100A6,SERPINE2,STMN1,TNC,UCHL1,VCAN,VCL,VIM,YWHAE
GO:0043271	negative regulation of ion transport	8	143	0.0039	ENSP00000261448,ENSP00000264335,ENSP00000338345,ENSP00000350132,ENSP00000354490,ENSP00000379845,ENSP00000415786,ENSP00000443495	ABAT,ACTN2,ATP1A2,CASQ2,PLN,SERPINE2,SNCA,YWHAE
GO:0051271	negative regulation of cellular component movement	11	270	0.0039	ENSP00000052754,ENSP00000211998,ENSP00000246792,ENSP00000300574,ENSP00000304408,ENSP00000304669,ENSP00000331544,ENSP00000343690,ENSP00000351022,ENSP00000377941,ENSP00000442600	ACTN1,COL3A1,CRK,CTNNA1,DAG1,DCN,DPYSL3,FBLN1,RRAS,TPM1,VCL
GO:0005977	glycogen metabolic process	5	47	0.004	ENSP00000216962,ENSP00000237642,ENSP00000317904,ENSP00000378769,ENSP00000410833	GBE1,GYS1,PPP1CB,PYGB,STBD1
GO:0051130	positive regulation of cellular component organization	26	1128	0.004	ENSP00000052754,ENSP00000264335,ENSP00000268150,ENSP00000300574,ENSP00000306015,ENSP00000337838,ENSP00000338345,ENSP00000343690,ENSP00000346839,ENSP00000348965,ENSP00000351022,ENSP00000352834,ENSP00000354681,ENSP00000354923,ENSP00000357206,ENSP00000360762,ENSP00000362924,ENSP00000368678,ENSP00000371267,ENSP00000371798,ENSP00000377789,ENSP00000378289,ENSP00000385636,ENSP00000437073,ENSP00000442600…	ACTN2,AGRN,ANKRD1,CRK,DAG1,DCN,DMD,DPYSL3,DYNC1H1,FN1,FSCN1,GSN,MFGE8,MYO18A,MYO1C,NES,OBSL1,OPA1,RTN4,SNCA,SYNPO,SYNPO2,SYNPO2L,TPM1,YWHAE,YWHAQ
GO:0051279	regulation of release of sequestered calcium ion into cytosol	6	75	0.004	ENSP00000261448,ENSP00000338345,ENSP00000350132,ENSP00000354490,ENSP00000354923,ENSP00000362071	ATP1A2,CASQ2,DMD,JPH2,PLN,SNCA
GO:0007492	endoderm development	6	76	0.0042	ENSP00000258341,ENSP00000325146,ENSP00000346839,ENSP00000353654,ENSP00000355180,ENSP00000452120	COL12A1,COL4A2,COL6A1,FN1,ITGA7,LAMC1
GO:1903510	mucopolysaccharide metabolic process	7	109	0.0042	ENSP00000052754,ENSP00000262551,ENSP00000265077,ENSP00000266718,ENSP00000327336,ENSP00000343924,ENSP00000347041	BGN,DCN,FMOD,LUM,OGN,PRELP,VCAN
GO:0038063	collagen-activated tyrosine kinase receptor signaling pathway	3	9	0.0043	ENSP00000225964,ENSP00000353654,ENSP00000364979	COL1A1,COL4A1,COL4A2
GO:0051017	actin filament bundle assembly	5	48	0.0043	ENSP00000299767,ENSP00000343690,ENSP00000360293,ENSP00000371798,ENSP00000377941	ACTN1,DPYSL3,FSCN1,HSP90B1,SORBS1
GO:0007018	microtubule-based movement	11	276	0.0044	ENSP00000248553,ENSP00000284440,ENSP00000290158,ENSP00000300231,ENSP00000347507,ENSP00000348965,ENSP00000352834,ENSP00000353375,ENSP00000353590,ENSP00000354681,ENSP00000437073	DYNC1H1,HSPB1,KPNB1,MAP1A,MAP4,MYH10,MYH7,MYO18A,MYO1C,OPA1,UCHL1
GO:0050808	synapse organization	9	189	0.0046	ENSP00000265131,ENSP00000269141,ENSP00000338345,ENSP00000353590,ENSP00000356515,ENSP00000364979,ENSP00000368678,ENSP00000377789,ENSP00000388325	AGRN,CDH2,COL4A1,LAMB2,MYH10,SNCA,SYNPO,TNC,UTRN
GO:0055017	cardiac muscle tissue growth	4	26	0.0047	ENSP00000347852,ENSP00000365663,ENSP00000376475,ENSP00000480359	NPPA,PDLIM5,PRKAR1A,SORBS2
GO:0048523	negative regulation of cellular process	70	4454	0.0048	ENSP00000052754,ENSP00000211998,ENSP00000216218,ENSP00000217244,ENSP00000225964,ENSP00000227525,ENSP00000246792,ENSP00000248553,ENSP00000261448,ENSP00000261883,ENSP00000262506,ENSP00000262551,ENSP00000264335,ENSP00000265131,ENSP00000269141,ENSP00000284031,ENSP00000284440,ENSP00000295550,ENSP00000299767,ENSP00000300231,ENSP00000300574,ENSP00000304408,ENSP00000304669,ENSP00000310491,ENSP00000325527…	ABAT,ACTN1,ACTN2,ANG,ANKRD1,ARHGAP1,ASPN,ATP2B4,BGN,CASQ2,CDH2,CILP,CLTC,COL18A1,COL1A1,COL3A1,COL5A1,COL6A3,COMT,CRK,CSNK2A1,CSNK2A2,CSRP3,CTNNA1,DAG1,DCN,DDAH1,DMD,DPT,DPYSL3,FAM129A,FBLN1,FBN1,FHL1,FN1,GSN,HSP90B1,HSPA2,HSPA8,HSPB1,HSPB6,HSPG2,ITGB1,JPH2,MAP1A,MAP4,MYO18A,NPPA,OGN,OPA1,POSTN,PRKAR1A,RRAS,RTN4,SEC22B,SERPINE2,SERPINH1,SLC25A5,SNCA,ST13,STMN1,TGFBI,TMEM109,TNC,TPM1,UCHL1,VCL,VIM…
GO:0032410	negative regulation of transporter activity	6	79	0.0049	ENSP00000261448,ENSP00000264335,ENSP00000338345,ENSP00000350132,ENSP00000354490,ENSP00000443495	ACTN2,ATP1A2,CASQ2,PLN,SNCA,YWHAE
GO:0031099	regeneration	8	151	0.005	ENSP00000262506,ENSP00000265131,ENSP00000304669,ENSP00000361512,ENSP00000362924,ENSP00000369071,ENSP00000388325,ENSP00000442600	CSNK2A2,CTNNA1,DAG1,GSN,LAMB2,POSTN,PRPS1,TNC
GO:0001704	formation of primary germ layer	7	115	0.0051	ENSP00000325146,ENSP00000346839,ENSP00000353654,ENSP00000355180,ENSP00000376475,ENSP00000379350,ENSP00000452120	COL12A1,COL4A2,COL6A1,FN1,ITGA7,ITGB1,PRKAR1A
GO:0032940	secretion by cell	23	959	0.0051	ENSP00000211998,ENSP00000216962,ENSP00000217971,ENSP00000237642,ENSP00000247461,ENSP00000248437,ENSP00000261978,ENSP00000290158,ENSP00000296130,ENSP00000304376,ENSP00000311905,ENSP00000316029,ENSP00000341289,ENSP00000346839,ENSP00000348965,ENSP00000353590,ENSP00000354468,ENSP00000362924,ENSP00000377941,ENSP00000415786,ENSP00000432083,ENSP00000443495,ENSP00000467141	ACTN1,ACTN2,CANX,CLEC3B,CYB5R3,DYNC1H1,FN1,GSN,HSPA8,KPNB1,LTBP2,LTBP4,MYH10,PGRMC1,PYGB,RAB24,SERPINE2,STBD1,TLN1,TTN,TUBA4A,TUBB4B,VCL
GO:0033043	regulation of organelle organization	26	1155	0.0051	ENSP00000052754,ENSP00000264335,ENSP00000269141,ENSP00000300574,ENSP00000306015,ENSP00000333938,ENSP00000338345,ENSP00000348965,ENSP00000351022,ENSP00000351790,ENSP00000352834,ENSP00000353375,ENSP00000354681,ENSP00000357206,ENSP00000360671,ENSP00000362924,ENSP00000371267,ENSP00000371798,ENSP00000376475,ENSP00000377789,ENSP00000378289,ENSP00000385636,ENSP00000410452,ENSP00000443495,ENSP00000463393…	ACTN2,CDH2,CLTC,CRK,DCN,DYNC1H1,FSCN1,GSN,MAP4,MYO1C,MYPN,NES,NEXN,OBSL1,OPA1,PRKAR1A,SEC22B,SLC25A5,SNCA,STMN1,SYNPO,SYNPO2,SYNPO2L,TPM1,YWHAE,YWHAQ
GO:0034764	positive regulation of transmembrane transport	9	194	0.0051	ENSP00000338345,ENSP00000349320,ENSP00000354681,ENSP00000354923,ENSP00000360293,ENSP00000362071,ENSP00000365663,ENSP00000378199,ENSP00000443495	ACTN2,CACNA2D1,DMD,HSPA2,JPH2,NPPA,OPA1,SNCA,SORBS1
GO:0048699	generation of neurons	30	1422	0.0051	ENSP00000211998,ENSP00000262551,ENSP00000264059,ENSP00000264335,ENSP00000265131,ENSP00000269141,ENSP00000284440,ENSP00000304408,ENSP00000304669,ENSP00000337838,ENSP00000343690,ENSP00000346839,ENSP00000353375,ENSP00000353590,ENSP00000354681,ENSP00000354923,ENSP00000357709,ENSP00000360762,ENSP00000368678,ENSP00000369071,ENSP00000379350,ENSP00000385636,ENSP00000388325,ENSP00000400365,ENSP00000410452…	AGRN,ANKRD1,CDH2,COL3A1,CTNNA1,DAG1,DMD,DPYSL3,EFHD1,FN1,ITGB1,LAMA2,LAMB2,MAP4,MYH10,NCAM1,OBSL1,OGN,OPA1,PDLIM5,POSTN,RTN4,S100A6,SERPINE2,STMN1,TNC,UCHL1,VCL,VIM,YWHAE
GO:0060314	regulation of ryanodine-sensitive calcium-release channel activity	4	27	0.0051	ENSP00000261448,ENSP00000350132,ENSP00000354923,ENSP00000362071	CASQ2,DMD,JPH2,PLN
GO:1901016	regulation of potassium ion transmembrane transporter activity	5	51	0.0051	ENSP00000261448,ENSP00000264335,ENSP00000365663,ENSP00000377710,ENSP00000443495	ACTN2,CASQ2,FHL1,NPPA,YWHAE
GO:1901701	cellular response to oxygen-containing compound	22	896	0.0051	ENSP00000225964,ENSP00000265131,ENSP00000297268,ENSP00000299767,ENSP00000300574,ENSP00000304408,ENSP00000304669,ENSP00000325527,ENSP00000338345,ENSP00000349320,ENSP00000350310,ENSP00000351022,ENSP00000354681,ENSP00000355180,ENSP00000360293,ENSP00000360762,ENSP00000364979,ENSP00000368678,ENSP00000371554,ENSP00000376475,ENSP00000442600,ENSP00000443495	ACTN2,AGRN,ANKRD1,ATP2B4,CACNA2D1,COL1A1,COL1A2,COL3A1,COL4A1,COL6A1,CRK,CTNNA1,DAG1,FBN1,HSP90B1,OPA1,PRKAR1A,SNCA,SOD3,SORBS1,TNC,TPM1
GO:2001257	regulation of cation channel activity	8	152	0.0051	ENSP00000261448,ENSP00000295951,ENSP00000349320,ENSP00000350132,ENSP00000354923,ENSP00000362071,ENSP00000365663,ENSP00000443495	ACTN2,CACNA2D1,CASQ2,DMD,JPH2,NPPA,PLN,SLMAP
GO:0002028	regulation of sodium ion transport	6	82	0.0054	ENSP00000295951,ENSP00000350310,ENSP00000354490,ENSP00000354923,ENSP00000356515,ENSP00000415786	ATP1A2,ATP2B4,DMD,SERPINE2,SLMAP,UTRN
GO:0051234	establishment of localization	67	4248	0.0058	ENSP00000211998,ENSP00000216962,ENSP00000217971,ENSP00000224807,ENSP00000225964,ENSP00000227525,ENSP00000237642,ENSP00000247461,ENSP00000248437,ENSP00000248553,ENSP00000261448,ENSP00000261978,ENSP00000262418,ENSP00000264335,ENSP00000268150,ENSP00000271064,ENSP00000284440,ENSP00000285381,ENSP00000290158,ENSP00000296130,ENSP00000299767,ENSP00000300231,ENSP00000300574,ENSP00000302961,ENSP00000304376…	ACTN1,ACTN2,ACTR1A,ARHGAP1,ATP1A2,ATP2B4,BCAP31,CA1,CA3,CACNA2D1,CANX,CASQ2,CLEC3B,CLTB,CLTC,COL1A1,CRK,CYB5R3,DYNC1H1,DYSF,FBLN5,FN1,GSN,HBD,HK1,HSP90B1,HSPA4,HSPA8,HSPB1,HSPG2,ITGB1,JPH2,KPNB1,LTBP2,LTBP4,MAP1A,MAP4,MFGE8,MYH10,MYO18A,MYO1C,OPA1,PGRMC1,PLN,PYGB,RAB24,S100A6,SEC22B,SERINC1,SERPINE2,SFXN3,SLC25A5,SLC4A1,SNCA,STBD1,TGM2,TINAGL1,TLN1,TMEM109,TTN,TUBA1B,TUBA4A,TUBB4B,UCHL1,VCL,YWHAE…
GO:0098657	import into cell	17	609	0.0058	ENSP00000247461,ENSP00000268150,ENSP00000271064,ENSP00000299767,ENSP00000300574,ENSP00000309415,ENSP00000310491,ENSP00000338345,ENSP00000349320,ENSP00000350310,ENSP00000352834,ENSP00000354490,ENSP00000355330,ENSP00000362924,ENSP00000363827,ENSP00000379350,ENSP00000479606	ARHGAP1,ATP1A2,ATP2B4,CACNA2D1,CANX,CLTB,CLTC,CRK,GSN,HSP90B1,HSPG2,ITGB1,MFGE8,MYO1C,SNCA,TGM2,TINAGL1
GO:0000904	cell morphogenesis involved in differentiation	15	498	0.006	ENSP00000211998,ENSP00000258341,ENSP00000262551,ENSP00000284440,ENSP00000346839,ENSP00000347665,ENSP00000353590,ENSP00000357709,ENSP00000377941,ENSP00000379350,ENSP00000388325,ENSP00000400365,ENSP00000410452,ENSP00000442600,ENSP00000480132	ACTN1,COL18A1,DAG1,FN1,ITGB1,LAMA2,LAMB2,LAMC1,MYH10,NCAM1,OGN,S100A6,STMN1,UCHL1,VCL
GO:0018146	keratan sulfate biosynthetic process	4	29	0.0061	ENSP00000262551,ENSP00000266718,ENSP00000343924,ENSP00000347041	FMOD,LUM,OGN,PRELP
GO:0031175	neuron projection development	17	616	0.0065	ENSP00000211998,ENSP00000262551,ENSP00000264059,ENSP00000265131,ENSP00000284440,ENSP00000304669,ENSP00000337838,ENSP00000353375,ENSP00000353590,ENSP00000357709,ENSP00000369071,ENSP00000379350,ENSP00000388325,ENSP00000400365,ENSP00000410452,ENSP00000442600,ENSP00000480132	CTNNA1,DAG1,EFHD1,ITGB1,LAMA2,LAMB2,MAP4,MYH10,NCAM1,OGN,POSTN,RTN4,S100A6,STMN1,TNC,UCHL1,VCL
GO:0051495	positive regulation of cytoskeleton organization	9	203	0.0068	ENSP00000306015,ENSP00000348965,ENSP00000351022,ENSP00000352834,ENSP00000357206,ENSP00000362924,ENSP00000377789,ENSP00000378289,ENSP00000443495	ACTN2,DYNC1H1,GSN,MYO1C,NES,SYNPO,SYNPO2,SYNPO2L,TPM1
GO:1904951	positive regulation of establishment of protein localization	13	397	0.0068	ENSP00000196371,ENSP00000264335,ENSP00000277865,ENSP00000336762,ENSP00000352834,ENSP00000353590,ENSP00000360762,ENSP00000369071,ENSP00000371267,ENSP00000379845,ENSP00000392330,ENSP00000437073,ENSP00000467141	ABAT,ANG,ANKRD1,BCAP31,GLUD1,MYH10,MYO18A,MYO1C,OXCT1,POSTN,TTN,YWHAE,YWHAQ
GO:0007417	central nervous system development	21	861	0.0069	ENSP00000196371,ENSP00000262506,ENSP00000264335,ENSP00000265077,ENSP00000269141,ENSP00000274341,ENSP00000304408,ENSP00000337838,ENSP00000345774,ENSP00000350310,ENSP00000353590,ENSP00000357206,ENSP00000362924,ENSP00000363827,ENSP00000364979,ENSP00000379350,ENSP00000379845,ENSP00000388325,ENSP00000410452,ENSP00000415786,ENSP00000446007	ABAT,ALDH3A2,ATP2B4,CDH2,COL3A1,COL4A1,CSNK2A2,GSN,HAPLN1,HSPG2,ITGB1,LAMB2,MYH10,NES,OXCT1,RTN4,SERPINE2,STMN1,VCAN,VIM,YWHAE
GO:0007006	mitochondrial membrane organization	7	123	0.0071	ENSP00000264335,ENSP00000290913,ENSP00000302961,ENSP00000338345,ENSP00000354681,ENSP00000360671,ENSP00000371267	CHCHD6,HSPA4,OPA1,SLC25A5,SNCA,YWHAE,YWHAQ
GO:1902305	regulation of sodium ion transmembrane transport	5	56	0.0071	ENSP00000295951,ENSP00000350310,ENSP00000354490,ENSP00000354923,ENSP00000356515	ATP1A2,ATP2B4,DMD,SLMAP,UTRN
GO:0030208	dermatan sulfate biosynthetic process	3	12	0.0073	ENSP00000052754,ENSP00000265077,ENSP00000327336	BGN,DCN,VCAN
GO:0043500	muscle adaptation	4	31	0.0073	ENSP00000347507,ENSP00000362924,ENSP00000365663,ENSP00000379895	GATM,GSN,MYH7,NPPA
GO:1901137	carbohydrate derivative biosynthetic process	17	625	0.0073	ENSP00000052754,ENSP00000215567,ENSP00000262551,ENSP00000265077,ENSP00000266718,ENSP00000327336,ENSP00000343924,ENSP00000347041,ENSP00000357384,ENSP00000360644,ENSP00000361512,ENSP00000363827,ENSP00000365663,ENSP00000368678,ENSP00000370517,ENSP00000402103,ENSP00000443216	AGRN,BGN,DCN,DPM1,DPM3,FMOD,HK1,HSPG2,LUM,NPPA,OGN,PFKP,PRELP,PRPS1,TECR,TMEM258,VCAN
GO:1905475	regulation of protein localization to membrane	8	163	0.0073	ENSP00000264335,ENSP00000269141,ENSP00000352834,ENSP00000360293,ENSP00000362924,ENSP00000371267,ENSP00000379350,ENSP00000479606	CDH2,CLTC,GSN,ITGB1,MYO1C,SORBS1,YWHAE,YWHAQ
GO:0001501	skeletal system development	14	457	0.0074	ENSP00000225964,ENSP00000265077,ENSP00000266718,ENSP00000268835,ENSP00000274341,ENSP00000297268,ENSP00000300026,ENSP00000304408,ENSP00000325146,ENSP00000325527,ENSP00000343924,ENSP00000369071,ENSP00000416330,ENSP00000434412	COL12A1,COL1A1,COL1A2,COL3A1,FBN1,HAPLN1,LUM,POSTN,PPIB,PRELP,PRPSAP2,SERPINH1,TGFBI,VCAN
GO:0006810	transport	65	4130	0.0074	ENSP00000211998,ENSP00000216962,ENSP00000217971,ENSP00000224807,ENSP00000225964,ENSP00000227525,ENSP00000237642,ENSP00000247461,ENSP00000248437,ENSP00000248553,ENSP00000261448,ENSP00000261978,ENSP00000262418,ENSP00000264335,ENSP00000268150,ENSP00000271064,ENSP00000284440,ENSP00000285381,ENSP00000290158,ENSP00000296130,ENSP00000299767,ENSP00000300231,ENSP00000300574,ENSP00000302961,ENSP00000304376…	ACTN1,ACTN2,ACTR1A,ARHGAP1,ATP1A2,ATP2B4,BCAP31,CA1,CA3,CACNA2D1,CANX,CASQ2,CLEC3B,CLTB,CLTC,COL1A1,CRK,CYB5R3,DYNC1H1,DYSF,FBLN5,FN1,GSN,HBD,HSP90B1,HSPA4,HSPA8,HSPB1,HSPG2,ITGB1,JPH2,KPNB1,LTBP2,LTBP4,MAP1A,MFGE8,MYH10,MYO18A,MYO1C,OPA1,PGRMC1,PLN,PYGB,RAB24,S100A6,SEC22B,SERINC1,SERPINE2,SFXN3,SLC25A5,SLC4A1,SNCA,STBD1,TGM2,TINAGL1,TLN1,TMEM109,TTN,TUBA1B,TUBA4A,TUBB4B,UCHL1,VCL,YWHAE,YWHAQ
GO:0010646	regulation of cell communication	55	3327	0.0074	ENSP00000052754,ENSP00000196371,ENSP00000217244,ENSP00000225964,ENSP00000246792,ENSP00000248553,ENSP00000261448,ENSP00000261883,ENSP00000262506,ENSP00000262551,ENSP00000264335,ENSP00000269141,ENSP00000277865,ENSP00000284440,ENSP00000300231,ENSP00000300574,ENSP00000304408,ENSP00000304669,ENSP00000310491,ENSP00000311905,ENSP00000325527,ENSP00000327336,ENSP00000327801,ENSP00000331544,ENSP00000337838…	ABAT,ANKRD1,ARHGAP1,ASPN,ATP1A2,ATP2B4,BCAP31,BGN,CASQ2,CDH2,CILP,COL1A1,COL3A1,CRK,CSNK2A1,CSNK2A2,CTNNA1,DAG1,DCN,DMD,FBLN1,FBN1,FN1,GLUD1,GSN,HSPB1,ITGB1,JPH2,LAMA2,LTBP4,MAP1A,MYO1C,NCAM1,NPPA,OBSCN,OGN,OPA1,OXCT1,P4HB,PLN,POSTN,RDH11,RRAS,RTN4,SERPINE2,SLC25A5,SNCA,SORBS1,STMN1,SYNPO,TGM2,THBS4,UCHL1,YWHAE,YWHAQ
GO:0048878	chemical homeostasis	23	995	0.0074	ENSP00000052754,ENSP00000224807,ENSP00000261448,ENSP00000262418,ENSP00000264335,ENSP00000295951,ENSP00000299767,ENSP00000310491,ENSP00000325527,ENSP00000338345,ENSP00000349320,ENSP00000350132,ENSP00000350310,ENSP00000354490,ENSP00000354681,ENSP00000355330,ENSP00000362071,ENSP00000376475,ENSP00000377710,ENSP00000392330,ENSP00000402103,ENSP00000410452,ENSP00000431813	ARHGAP1,ATP1A2,ATP2B4,BCAP31,CACNA2D1,CASQ2,CSRP3,DCN,FBN1,FHL1,HK1,HSP90B1,JPH2,OPA1,PLN,PRKAR1A,SFXN3,SLC4A1,SLMAP,SNCA,STMN1,TGM2,YWHAE
GO:2000146	negative regulation of cell motility	10	253	0.0074	ENSP00000052754,ENSP00000211998,ENSP00000246792,ENSP00000300574,ENSP00000304408,ENSP00000304669,ENSP00000331544,ENSP00000343690,ENSP00000351022,ENSP00000442600	COL3A1,CRK,CTNNA1,DAG1,DCN,DPYSL3,FBLN1,RRAS,TPM1,VCL
GO:0007568	aging	10	255	0.0078	ENSP00000052754,ENSP00000247461,ENSP00000304669,ENSP00000338345,ENSP00000343924,ENSP00000353654,ENSP00000354681,ENSP00000362924,ENSP00000379845,ENSP00000442600	ABAT,CANX,COL4A2,CTNNA1,DAG1,DCN,GSN,OPA1,PRELP,SNCA
GO:0060306	regulation of membrane repolarization	4	32	0.0079	ENSP00000261448,ENSP00000264335,ENSP00000349320,ENSP00000365663	CACNA2D1,CASQ2,NPPA,YWHAE
GO:0045055	regulated exocytosis	18	691	0.008	ENSP00000211998,ENSP00000216962,ENSP00000217971,ENSP00000237642,ENSP00000248437,ENSP00000290158,ENSP00000296130,ENSP00000304376,ENSP00000316029,ENSP00000341289,ENSP00000346839,ENSP00000348965,ENSP00000354468,ENSP00000362924,ENSP00000377941,ENSP00000432083,ENSP00000443495,ENSP00000467141	ACTN1,ACTN2,CLEC3B,CYB5R3,DYNC1H1,FN1,GSN,HSPA8,KPNB1,PGRMC1,PYGB,RAB24,STBD1,TLN1,TTN,TUBA4A,TUBB4B,VCL
GO:0018149	peptide cross-linking	5	59	0.0081	ENSP00000052754,ENSP00000304408,ENSP00000327336,ENSP00000346839,ENSP00000355330	BGN,COL3A1,DCN,FN1,TGM2
GO:0031670	cellular response to nutrient	5	59	0.0081	ENSP00000225964,ENSP00000265131,ENSP00000299767,ENSP00000354681,ENSP00000369071	COL1A1,HSP90B1,OPA1,POSTN,TNC
GO:0032414	positive regulation of ion transmembrane transporter activity	6	91	0.0081	ENSP00000349320,ENSP00000354923,ENSP00000362071,ENSP00000365663,ENSP00000378199,ENSP00000443495	ACTN2,CACNA2D1,DMD,HSPA2,JPH2,NPPA
GO:0042391	regulation of membrane potential	13	408	0.0081	ENSP00000052754,ENSP00000261448,ENSP00000264335,ENSP00000295951,ENSP00000338345,ENSP00000349320,ENSP00000350132,ENSP00000354490,ENSP00000354923,ENSP00000365663,ENSP00000377710,ENSP00000379845,ENSP00000443495	ABAT,ACTN2,ATP1A2,CACNA2D1,CASQ2,DCN,DMD,FHL1,NPPA,PLN,SLMAP,SNCA,YWHAE
GO:0046903	secretion	24	1070	0.0081	ENSP00000211998,ENSP00000216962,ENSP00000217971,ENSP00000237642,ENSP00000247461,ENSP00000248437,ENSP00000261978,ENSP00000290158,ENSP00000296130,ENSP00000304376,ENSP00000311905,ENSP00000316029,ENSP00000341289,ENSP00000345008,ENSP00000346839,ENSP00000348965,ENSP00000353590,ENSP00000354468,ENSP00000362924,ENSP00000377941,ENSP00000415786,ENSP00000432083,ENSP00000443495,ENSP00000467141	ACTN1,ACTN2,CANX,CLEC3B,CYB5R3,DYNC1H1,FBLN5,FN1,GSN,HSPA8,KPNB1,LTBP2,LTBP4,MYH10,PGRMC1,PYGB,RAB24,SERPINE2,STBD1,TLN1,TTN,TUBA4A,TUBB4B,VCL
GO:0071496	cellular response to external stimulus	11	305	0.0081	ENSP00000225964,ENSP00000265131,ENSP00000299767,ENSP00000354490,ENSP00000354511,ENSP00000354681,ENSP00000360762,ENSP00000365663,ENSP00000369071,ENSP00000432083,ENSP00000442600	ANKRD1,ATP1A2,COL1A1,COMT,DAG1,HSP90B1,HSPA8,NPPA,OPA1,POSTN,TNC
GO:0030205	dermatan sulfate metabolic process	3	13	0.0082	ENSP00000052754,ENSP00000265077,ENSP00000327336	BGN,DCN,VCAN
GO:0034333	adherens junction assembly	4	33	0.0085	ENSP00000211998,ENSP00000360293,ENSP00000377941,ENSP00000443495	ACTN1,ACTN2,SORBS1,VCL
GO:0048666	neuron development	19	758	0.0085	ENSP00000211998,ENSP00000262551,ENSP00000264059,ENSP00000265131,ENSP00000284440,ENSP00000304669,ENSP00000337838,ENSP00000343690,ENSP00000353375,ENSP00000353590,ENSP00000357709,ENSP00000368678,ENSP00000369071,ENSP00000379350,ENSP00000388325,ENSP00000400365,ENSP00000410452,ENSP00000442600,ENSP00000480132	AGRN,CTNNA1,DAG1,DPYSL3,EFHD1,ITGB1,LAMA2,LAMB2,MAP4,MYH10,NCAM1,OGN,POSTN,RTN4,S100A6,STMN1,TNC,UCHL1,VCL
GO:0048729	tissue morphogenesis	15	522	0.0085	ENSP00000211998,ENSP00000265131,ENSP00000304408,ENSP00000347507,ENSP00000351022,ENSP00000355330,ENSP00000360762,ENSP00000360882,ENSP00000364979,ENSP00000376475,ENSP00000379210,ENSP00000379350,ENSP00000386840,ENSP00000442600,ENSP00000467141	ANKRD1,COL3A1,COL4A1,COL5A1,DAG1,ITGB1,MYH7,MYL3,PRKAR1A,TGM2,TNC,TPM1,TTN,VCL,XIRP2
GO:0023051	regulation of signaling	55	3360	0.0088	ENSP00000052754,ENSP00000196371,ENSP00000217244,ENSP00000225964,ENSP00000246792,ENSP00000248553,ENSP00000261448,ENSP00000261883,ENSP00000262506,ENSP00000262551,ENSP00000264335,ENSP00000269141,ENSP00000277865,ENSP00000284440,ENSP00000300231,ENSP00000300574,ENSP00000304408,ENSP00000304669,ENSP00000310491,ENSP00000311905,ENSP00000325527,ENSP00000327336,ENSP00000327801,ENSP00000331544,ENSP00000337838…	ABAT,ANKRD1,ARHGAP1,ASPN,ATP1A2,ATP2B4,BCAP31,BGN,CASQ2,CDH2,CILP,COL1A1,COL3A1,CRK,CSNK2A1,CSNK2A2,CTNNA1,DAG1,DCN,DMD,FBLN1,FBN1,FN1,GLUD1,GSN,HSPB1,ITGB1,JPH2,LAMA2,LTBP4,MAP1A,MYO1C,NCAM1,NPPA,OBSCN,OGN,OPA1,OXCT1,P4HB,PLN,POSTN,RDH11,RRAS,RTN4,SERPINE2,SLC25A5,SNCA,SORBS1,STMN1,SYNPO,TGM2,THBS4,UCHL1,YWHAE,YWHAQ
GO:1904237	positive regulation of substrate-dependent cell migration, cell attachment to substrate	2	2	0.009	ENSP00000331544,ENSP00000346839	FBLN1,FN1
GO:0042339	keratan sulfate metabolic process	4	34	0.0091	ENSP00000262551,ENSP00000266718,ENSP00000343924,ENSP00000347041	FMOD,LUM,OGN,PRELP
GO:0044272	sulfur compound biosynthetic process	8	172	0.0091	ENSP00000052754,ENSP00000215567,ENSP00000262551,ENSP00000265077,ENSP00000266718,ENSP00000327336,ENSP00000343924,ENSP00000347041	BGN,DCN,FMOD,LUM,OGN,PRELP,TECR,VCAN
GO:1901135	carbohydrate derivative metabolic process	24	1083	0.0091	ENSP00000052754,ENSP00000215567,ENSP00000262551,ENSP00000265077,ENSP00000266718,ENSP00000268835,ENSP00000327336,ENSP00000338345,ENSP00000340466,ENSP00000343924,ENSP00000347041,ENSP00000347507,ENSP00000354490,ENSP00000354681,ENSP00000357384,ENSP00000360644,ENSP00000361512,ENSP00000363827,ENSP00000365663,ENSP00000368678,ENSP00000370517,ENSP00000402103,ENSP00000432083,ENSP00000443216	AGRN,ATP1A2,BGN,DCN,DPM1,DPM3,FMOD,GANAB,HK1,HSPA8,HSPG2,LUM,MYH7,NPPA,OGN,OPA1,PFKP,PRELP,PRPS1,PRPSAP2,SNCA,TECR,TMEM258,VCAN
GO:1904064	positive regulation of cation transmembrane transport	7	131	0.0091	ENSP00000338345,ENSP00000349320,ENSP00000354923,ENSP00000362071,ENSP00000365663,ENSP00000378199,ENSP00000443495	ACTN2,CACNA2D1,DMD,HSPA2,JPH2,NPPA,SNCA
GO:0030207	chondroitin sulfate catabolic process	3	14	0.0094	ENSP00000052754,ENSP00000265077,ENSP00000327336	BGN,DCN,VCAN
GO:0051222	positive regulation of protein transport	12	365	0.0094	ENSP00000196371,ENSP00000264335,ENSP00000277865,ENSP00000336762,ENSP00000352834,ENSP00000353590,ENSP00000360762,ENSP00000369071,ENSP00000379845,ENSP00000392330,ENSP00000437073,ENSP00000467141	ABAT,ANG,ANKRD1,BCAP31,GLUD1,MYH10,MYO18A,MYO1C,OXCT1,POSTN,TTN,YWHAE
GO:0050801	ion homeostasis	18	708	0.0096	ENSP00000052754,ENSP00000224807,ENSP00000261448,ENSP00000262418,ENSP00000264335,ENSP00000295951,ENSP00000299767,ENSP00000310491,ENSP00000338345,ENSP00000349320,ENSP00000350132,ENSP00000350310,ENSP00000354490,ENSP00000355330,ENSP00000362071,ENSP00000377710,ENSP00000392330,ENSP00000431813	ARHGAP1,ATP1A2,ATP2B4,BCAP31,CACNA2D1,CASQ2,CSRP3,DCN,FHL1,HSP90B1,JPH2,PLN,SFXN3,SLC4A1,SLMAP,SNCA,TGM2,YWHAE
GO:0033238	regulation of cellular amine metabolic process	4	35	0.0098	ENSP00000338345,ENSP00000350310,ENSP00000354511,ENSP00000379845	ABAT,ATP2B4,COMT,SNCA
GO:1902903	regulation of supramolecular fiber organization	11	316	0.0098	ENSP00000306015,ENSP00000338345,ENSP00000351022,ENSP00000352834,ENSP00000362924,ENSP00000363827,ENSP00000377789,ENSP00000378289,ENSP00000410452,ENSP00000432083,ENSP00000443495	ACTN2,GSN,HSPA8,HSPG2,MYO1C,SNCA,STMN1,SYNPO,SYNPO2,SYNPO2L,TPM1
GO:0061337	cardiac conduction	5	63	0.01	ENSP00000261448,ENSP00000264335,ENSP00000349320,ENSP00000350132,ENSP00000354490	ATP1A2,CACNA2D1,CASQ2,PLN,YWHAE
GO:0006887	exocytosis	19	774	0.0102	ENSP00000211998,ENSP00000216962,ENSP00000217971,ENSP00000237642,ENSP00000248437,ENSP00000290158,ENSP00000296130,ENSP00000304376,ENSP00000316029,ENSP00000341289,ENSP00000346839,ENSP00000348965,ENSP00000353590,ENSP00000354468,ENSP00000362924,ENSP00000377941,ENSP00000432083,ENSP00000443495,ENSP00000467141	ACTN1,ACTN2,CLEC3B,CYB5R3,DYNC1H1,FN1,GSN,HSPA8,KPNB1,MYH10,PGRMC1,PYGB,RAB24,STBD1,TLN1,TTN,TUBA4A,TUBB4B,VCL
GO:0034613	cellular protein localization	28	1367	0.0103	ENSP00000211998,ENSP00000225964,ENSP00000248553,ENSP00000261978,ENSP00000264335,ENSP00000269141,ENSP00000290158,ENSP00000295951,ENSP00000299767,ENSP00000300231,ENSP00000302961,ENSP00000304669,ENSP00000309415,ENSP00000316029,ENSP00000345008,ENSP00000352834,ENSP00000354923,ENSP00000362924,ENSP00000368678,ENSP00000385636,ENSP00000392330,ENSP00000402103,ENSP00000431813,ENSP00000432083,ENSP00000442600…	ACTN2,AGRN,BCAP31,CDH2,CLTB,CLTC,COL1A1,CSRP3,CTNNA1,DAG1,DMD,FBLN5,GSN,HK1,HSP90B1,HSPA4,HSPA8,HSPB1,KPNB1,LTBP2,MAP1A,MYO1C,OBSCN,OBSL1,SLMAP,TLN1,VCL,YWHAE
GO:0048519	negative regulation of biological process	74	4953	0.0104	ENSP00000052754,ENSP00000211998,ENSP00000216218,ENSP00000217244,ENSP00000225964,ENSP00000227525,ENSP00000246792,ENSP00000248553,ENSP00000261448,ENSP00000261883,ENSP00000262506,ENSP00000262551,ENSP00000264335,ENSP00000265131,ENSP00000269141,ENSP00000284031,ENSP00000284440,ENSP00000295550,ENSP00000299767,ENSP00000300231,ENSP00000300574,ENSP00000304408,ENSP00000304669,ENSP00000310491,ENSP00000325527…	ABAT,ACTN1,ACTN2,ANG,ANKRD1,ARHGAP1,ASPN,ATP1A2,ATP2B4,BGN,CASQ2,CDH2,CILP,CLTC,COL18A1,COL1A1,COL3A1,COL4A2,COL5A1,COL6A3,COMT,CRK,CSNK2A1,CSNK2A2,CSRP3,CTNNA1,DAG1,DCN,DDAH1,DMD,DPT,DPYSL3,FAM129A,FBLN1,FBN1,FHL1,FN1,GSN,HSP90B1,HSPA2,HSPA8,HSPB1,HSPB6,HSPG2,ITGB1,JPH2,MAP1A,MAP4,MYO18A,NPPA,OGN,OPA1,PLN,POSTN,PRKAR1A,RRAS,RTN4,SEC22B,SERPINE2,SERPINH1,SLC25A5,SNCA,ST13,STMN1,TGFBI,THBS4,TMEM10…
GO:0007528	neuromuscular junction development	4	36	0.0105	ENSP00000265131,ENSP00000356515,ENSP00000364979,ENSP00000388325	COL4A1,LAMB2,TNC,UTRN
GO:0051272	positive regulation of cellular component movement	14	482	0.0108	ENSP00000225964,ENSP00000248553,ENSP00000256196,ENSP00000264036,ENSP00000300574,ENSP00000306015,ENSP00000331544,ENSP00000337838,ENSP00000339730,ENSP00000346839,ENSP00000347665,ENSP00000352834,ENSP00000369071,ENSP00000410452	COL18A1,COL1A1,CRK,FBLN1,FN1,HSPB1,MCAM,MYO1C,POSTN,RRAS2,RTN4,STMN1,SYNPO2,THBS4
GO:0065009	regulation of molecular function	54	3322	0.0108	ENSP00000052754,ENSP00000217244,ENSP00000234454,ENSP00000248553,ENSP00000261448,ENSP00000262551,ENSP00000263433,ENSP00000264335,ENSP00000268835,ENSP00000284031,ENSP00000284440,ENSP00000295550,ENSP00000295951,ENSP00000299767,ENSP00000300574,ENSP00000302476,ENSP00000306015,ENSP00000310491,ENSP00000325527,ENSP00000327336,ENSP00000331544,ENSP00000336762,ENSP00000338345,ENSP00000339730,ENSP00000342962…	ACTN2,AGRN,ANG,ARHGAP1,ASPN,ATP1A2,ATP2B4,BCAP31,BGN,CACNA2D1,CASQ2,COL6A3,CRK,CSNK2A1,DAG1,DCN,DDAH1,DMD,DNAJB4,FBLN1,FBN1,FHL1,FN1,GSN,HSP90B1,HSPA2,HSPB1,HSPB2,ITGB1,JPH2,MYL3,NCAM1,NES,NPPA,OBSCN,OGN,PLN,PPP1R12C,PRKAR1A,PRPSAP2,SERINC1,SERPINE2,SERPINH1,SLMAP,SNCA,SPR,STMN1,SYNPO2,THBS4,TPM1,TTN,UCHL1,UTRN,YWHAE
GO:0070482	response to oxygen levels	11	321	0.0108	ENSP00000225964,ENSP00000299767,ENSP00000327801,ENSP00000336762,ENSP00000354681,ENSP00000360305,ENSP00000360762,ENSP00000365663,ENSP00000369071,ENSP00000371554,ENSP00000379845	ABAT,ANG,ANKRD1,COL1A1,HSP90B1,NPPA,OPA1,P4HB,PDLIM1,POSTN,SOD3
GO:0090136	epithelial cell-cell adhesion	3	15	0.0108	ENSP00000211998,ENSP00000304669,ENSP00000339730	CTNNA1,THBS4,VCL
GO:0070201	regulation of establishment of protein localization	17	662	0.0114	ENSP00000196371,ENSP00000264335,ENSP00000277865,ENSP00000331544,ENSP00000336762,ENSP00000346839,ENSP00000352834,ENSP00000353590,ENSP00000360671,ENSP00000360762,ENSP00000369071,ENSP00000371267,ENSP00000379845,ENSP00000392330,ENSP00000432083,ENSP00000437073,ENSP00000467141	ABAT,ANG,ANKRD1,BCAP31,FBLN1,FN1,GLUD1,HSPA8,MYH10,MYO18A,MYO1C,OXCT1,POSTN,SLC25A5,TTN,YWHAE,YWHAQ
GO:0070495	negative regulation of thrombin-activated receptor signaling pathway	2	3	0.0133	ENSP00000338345,ENSP00000410452	SNCA,STMN1
GO:0099010	modification of postsynaptic structure	2	3	0.0133	ENSP00000353590,ENSP00000377789	MYH10,SYNPO
GO:0099641	anterograde axonal protein transport	2	3	0.0133	ENSP00000248553,ENSP00000300231	HSPB1,MAP1A
GO:1901020	negative regulation of calcium ion transmembrane transporter activity	4	39	0.0133	ENSP00000261448,ENSP00000264335,ENSP00000350132,ENSP00000354490	ATP1A2,CASQ2,PLN,YWHAE
GO:2001202	negative regulation of transforming growth factor-beta secretion	2	3	0.0133	ENSP00000331544,ENSP00000346839	FBLN1,FN1
GO:0035239	tube morphogenesis	16	615	0.0136	ENSP00000264036,ENSP00000265131,ENSP00000268150,ENSP00000269141,ENSP00000304408,ENSP00000336762,ENSP00000337838,ENSP00000346839,ENSP00000347665,ENSP00000353654,ENSP00000355330,ENSP00000363827,ENSP00000364979,ENSP00000379350,ENSP00000416330,ENSP00000442600	ANG,CDH2,COL18A1,COL3A1,COL4A1,COL4A2,DAG1,FN1,HSPG2,ITGB1,MCAM,MFGE8,RTN4,TGFBI,TGM2,TNC
GO:0044262	cellular carbohydrate metabolic process	7	144	0.0136	ENSP00000216962,ENSP00000237642,ENSP00000317904,ENSP00000370517,ENSP00000378769,ENSP00000402103,ENSP00000410833	GBE1,GYS1,HK1,PFKP,PPP1CB,PYGB,STBD1
GO:0006874	cellular calcium ion homeostasis	12	388	0.0139	ENSP00000261448,ENSP00000264335,ENSP00000299767,ENSP00000338345,ENSP00000349320,ENSP00000350132,ENSP00000350310,ENSP00000354490,ENSP00000355330,ENSP00000362071,ENSP00000392330,ENSP00000431813	ATP1A2,ATP2B4,BCAP31,CACNA2D1,CASQ2,CSRP3,HSP90B1,JPH2,PLN,SNCA,TGM2,YWHAE
GO:0010810	regulation of cell-substrate adhesion	8	189	0.0142	ENSP00000225964,ENSP00000284322,ENSP00000300574,ENSP00000331544,ENSP00000346839,ENSP00000356515,ENSP00000369071,ENSP00000442600	ABI3BP,COL1A1,CRK,DAG1,FBLN1,FN1,POSTN,UTRN
GO:0019725	cellular homeostasis	19	806	0.0146	ENSP00000261448,ENSP00000262418,ENSP00000264335,ENSP00000299767,ENSP00000300231,ENSP00000310491,ENSP00000327801,ENSP00000338345,ENSP00000349320,ENSP00000350132,ENSP00000350310,ENSP00000354490,ENSP00000354681,ENSP00000354923,ENSP00000355330,ENSP00000362071,ENSP00000392330,ENSP00000402103,ENSP00000431813	ARHGAP1,ATP1A2,ATP2B4,BCAP31,CACNA2D1,CASQ2,CSRP3,DMD,HK1,HSP90B1,JPH2,MAP1A,OPA1,P4HB,PLN,SLC4A1,SNCA,TGM2,YWHAE
GO:0032413	negative regulation of ion transmembrane transporter activity	5	71	0.0147	ENSP00000261448,ENSP00000264335,ENSP00000350132,ENSP00000354490,ENSP00000443495	ACTN2,ATP1A2,CASQ2,PLN,YWHAE
GO:0051223	regulation of protein transport	16	622	0.0148	ENSP00000196371,ENSP00000264335,ENSP00000277865,ENSP00000331544,ENSP00000336762,ENSP00000346839,ENSP00000352834,ENSP00000353590,ENSP00000360671,ENSP00000360762,ENSP00000369071,ENSP00000379845,ENSP00000392330,ENSP00000432083,ENSP00000437073,ENSP00000467141	ABAT,ANG,ANKRD1,BCAP31,FBLN1,FN1,GLUD1,HSPA8,MYH10,MYO18A,MYO1C,OXCT1,POSTN,SLC25A5,TTN,YWHAE
GO:0001666	response to hypoxia	10	288	0.0152	ENSP00000299767,ENSP00000327801,ENSP00000336762,ENSP00000354681,ENSP00000360305,ENSP00000360762,ENSP00000365663,ENSP00000369071,ENSP00000371554,ENSP00000379845	ABAT,ANG,ANKRD1,HSP90B1,NPPA,OPA1,P4HB,PDLIM1,POSTN,SOD3
GO:0048589	developmental growth	11	340	0.0153	ENSP00000211998,ENSP00000265131,ENSP00000347852,ENSP00000362924,ENSP00000365663,ENSP00000369071,ENSP00000376475,ENSP00000379350,ENSP00000388325,ENSP00000442600,ENSP00000480359	DAG1,GSN,ITGB1,LAMB2,NPPA,PDLIM5,POSTN,PRKAR1A,SORBS2,TNC,VCL
GO:0051051	negative regulation of transport	13	450	0.0155	ENSP00000261448,ENSP00000264335,ENSP00000310491,ENSP00000331544,ENSP00000338345,ENSP00000346839,ENSP00000350132,ENSP00000354490,ENSP00000354511,ENSP00000360671,ENSP00000379845,ENSP00000415786,ENSP00000443495	ABAT,ACTN2,ARHGAP1,ATP1A2,CASQ2,COMT,FBLN1,FN1,PLN,SERPINE2,SLC25A5,SNCA,YWHAE
GO:0000902	cell morphogenesis	16	626	0.0156	ENSP00000211998,ENSP00000258341,ENSP00000262551,ENSP00000284440,ENSP00000346839,ENSP00000347665,ENSP00000353590,ENSP00000357709,ENSP00000369071,ENSP00000377941,ENSP00000379350,ENSP00000388325,ENSP00000400365,ENSP00000410452,ENSP00000442600,ENSP00000480132	ACTN1,COL18A1,DAG1,FN1,ITGB1,LAMA2,LAMB2,LAMC1,MYH10,NCAM1,OGN,POSTN,S100A6,STMN1,UCHL1,VCL
GO:0010389	regulation of G2/M transition of mitotic cell cycle	7	149	0.0157	ENSP00000248437,ENSP00000264335,ENSP00000341289,ENSP00000348965,ENSP00000358921,ENSP00000377710,ENSP00000378199	ACTR1A,DYNC1H1,FHL1,HSPA2,TUBA4A,TUBB4B,YWHAE
GO:0050714	positive regulation of protein secretion	9	240	0.0157	ENSP00000196371,ENSP00000277865,ENSP00000336762,ENSP00000353590,ENSP00000360762,ENSP00000369071,ENSP00000379845,ENSP00000437073,ENSP00000467141	ABAT,ANG,ANKRD1,GLUD1,MYH10,MYO18A,OXCT1,POSTN,TTN
GO:0010811	positive regulation of cell-substrate adhesion	6	109	0.0159	ENSP00000284322,ENSP00000300574,ENSP00000331544,ENSP00000346839,ENSP00000356515,ENSP00000442600	ABI3BP,CRK,DAG1,FBLN1,FN1,UTRN
GO:0030335	positive regulation of cell migration	13	452	0.0159	ENSP00000225964,ENSP00000248553,ENSP00000256196,ENSP00000264036,ENSP00000300574,ENSP00000306015,ENSP00000331544,ENSP00000337838,ENSP00000339730,ENSP00000346839,ENSP00000347665,ENSP00000352834,ENSP00000369071	COL18A1,COL1A1,CRK,FBLN1,FN1,HSPB1,MCAM,MYO1C,POSTN,RRAS2,RTN4,SYNPO2,THBS4
GO:0044281	small molecule metabolic process	33	1779	0.0159	ENSP00000052754,ENSP00000196371,ENSP00000215567,ENSP00000234454,ENSP00000262551,ENSP00000265077,ENSP00000266718,ENSP00000268835,ENSP00000277865,ENSP00000284031,ENSP00000325527,ENSP00000327336,ENSP00000327801,ENSP00000338345,ENSP00000343924,ENSP00000345774,ENSP00000347041,ENSP00000347507,ENSP00000354468,ENSP00000354490,ENSP00000354681,ENSP00000360644,ENSP00000361512,ENSP00000364490,ENSP00000365663…	ABAT,ALDH3A2,ALDH4A1,ATP1A2,BGN,CA1,CYB5R3,DCN,DDAH1,DPM1,FBN1,FMOD,GATM,GLUD1,HK1,HSPA8,IVD,LUM,MYH7,NPPA,OGN,OPA1,OXCT1,P4HB,PFKP,PRELP,PRPS1,PRPSAP2,RDH11,SNCA,SPR,TECR,VCAN
GO:0051235	maintenance of location	7	150	0.016	ENSP00000261448,ENSP00000299767,ENSP00000316029,ENSP00000325527,ENSP00000362924,ENSP00000402103,ENSP00000442600	CASQ2,DAG1,FBN1,GSN,HK1,HSP90B1,TLN1
GO:0060322	head development	17	692	0.0164	ENSP00000196371,ENSP00000225964,ENSP00000246792,ENSP00000262506,ENSP00000264335,ENSP00000269141,ENSP00000304408,ENSP00000337838,ENSP00000350310,ENSP00000353590,ENSP00000357206,ENSP00000363827,ENSP00000364979,ENSP00000379350,ENSP00000379845,ENSP00000410452,ENSP00000415786	ABAT,ATP2B4,CDH2,COL1A1,COL3A1,COL4A1,CSNK2A2,HSPG2,ITGB1,MYH10,NES,OXCT1,RRAS,RTN4,SERPINE2,STMN1,YWHAE
GO:0030705	cytoskeleton-dependent intracellular transport	7	151	0.0165	ENSP00000248553,ENSP00000284440,ENSP00000300231,ENSP00000336799,ENSP00000348965,ENSP00000352834,ENSP00000354681	DYNC1H1,HSPB1,MAP1A,MYO1C,OPA1,TUBA1B,UCHL1
GO:0007409	axonogenesis	11	346	0.0166	ENSP00000211998,ENSP00000262551,ENSP00000284440,ENSP00000353590,ENSP00000357709,ENSP00000379350,ENSP00000388325,ENSP00000400365,ENSP00000410452,ENSP00000442600,ENSP00000480132	DAG1,ITGB1,LAMA2,LAMB2,MYH10,NCAM1,OGN,S100A6,STMN1,UCHL1,VCL
GO:0042063	gliogenesis	8	196	0.0166	ENSP00000265077,ENSP00000269141,ENSP00000337838,ENSP00000362924,ENSP00000388325,ENSP00000400365,ENSP00000442600,ENSP00000446007	CDH2,DAG1,GSN,LAMA2,LAMB2,RTN4,VCAN,VIM
GO:0051129	negative regulation of cellular component organization	16	632	0.0166	ENSP00000331544,ENSP00000337838,ENSP00000338345,ENSP00000343690,ENSP00000353375,ENSP00000354681,ENSP00000360671,ENSP00000362924,ENSP00000363827,ENSP00000369071,ENSP00000376475,ENSP00000378199,ENSP00000410452,ENSP00000432083,ENSP00000446007,ENSP00000463393	DPYSL3,FBLN1,GSN,HSPA2,HSPA8,HSPG2,MAP4,OPA1,POSTN,PRKAR1A,RTN4,SEC22B,SLC25A5,SNCA,STMN1,VIM
GO:0055117	regulation of cardiac muscle contraction	5	74	0.0166	ENSP00000261448,ENSP00000350132,ENSP00000354490,ENSP00000354923,ENSP00000365663	ATP1A2,CASQ2,DMD,NPPA,PLN
GO:0098930	axonal transport	4	43	0.0166	ENSP00000248553,ENSP00000284440,ENSP00000300231,ENSP00000354681	HSPB1,MAP1A,OPA1,UCHL1
GO:0007161	calcium-independent cell-matrix adhesion	2	4	0.0176	ENSP00000346839,ENSP00000379350	FN1,ITGB1
GO:0030035	microspike assembly	2	4	0.0176	ENSP00000371798,ENSP00000443495	ACTN2,FSCN1
GO:0032956	regulation of actin cytoskeleton organization	10	297	0.0176	ENSP00000300574,ENSP00000306015,ENSP00000351022,ENSP00000352834,ENSP00000362924,ENSP00000371798,ENSP00000377789,ENSP00000378289,ENSP00000410452,ENSP00000443495	ACTN2,CRK,FSCN1,GSN,MYO1C,STMN1,SYNPO,SYNPO2,SYNPO2L,TPM1
GO:0035995	detection of muscle stretch	2	4	0.0176	ENSP00000431813,ENSP00000467141	CSRP3,TTN
GO:0043462	regulation of ATPase activity	5	76	0.0176	ENSP00000350132,ENSP00000351022,ENSP00000359799,ENSP00000378199,ENSP00000379210	DNAJB4,HSPA2,MYL3,PLN,TPM1
GO:0045963	negative regulation of dopamine metabolic process	2	4	0.0176	ENSP00000338345,ENSP00000354511	COMT,SNCA
GO:0048662	negative regulation of smooth muscle cell proliferation	4	44	0.0176	ENSP00000262551,ENSP00000336762,ENSP00000351022,ENSP00000354511	ANG,COMT,OGN,TPM1
GO:0051208	sequestering of calcium ion	2	4	0.0176	ENSP00000261448,ENSP00000299767	CASQ2,HSP90B1
GO:0006082	organic acid metabolic process	21	959	0.0177	ENSP00000052754,ENSP00000215567,ENSP00000262551,ENSP00000265077,ENSP00000266718,ENSP00000277865,ENSP00000284031,ENSP00000327336,ENSP00000327801,ENSP00000338345,ENSP00000343924,ENSP00000345774,ENSP00000347041,ENSP00000354468,ENSP00000361512,ENSP00000364490,ENSP00000370517,ENSP00000379845,ENSP00000379895,ENSP00000402103,ENSP00000418397	ABAT,ALDH3A2,ALDH4A1,BGN,CYB5R3,DCN,DDAH1,FMOD,GATM,GLUD1,HK1,IVD,LUM,OGN,P4HB,PFKP,PRELP,PRPS1,SNCA,TECR,VCAN
GO:0050790	regulation of catalytic activity	39	2249	0.0179	ENSP00000052754,ENSP00000217244,ENSP00000234454,ENSP00000248553,ENSP00000263433,ENSP00000264335,ENSP00000268835,ENSP00000284031,ENSP00000284440,ENSP00000295550,ENSP00000299767,ENSP00000300574,ENSP00000302476,ENSP00000306015,ENSP00000310491,ENSP00000325527,ENSP00000327336,ENSP00000331544,ENSP00000336762,ENSP00000338345,ENSP00000342962,ENSP00000346839,ENSP00000350132,ENSP00000350310,ENSP00000351022…	AGRN,ANG,ARHGAP1,ASPN,ATP2B4,BCAP31,BGN,COL6A3,CRK,CSNK2A1,DAG1,DCN,DDAH1,DNAJB4,FBLN1,FBN1,FN1,GSN,HSP90B1,HSPA2,HSPB1,HSPB2,ITGB1,MYL3,NES,PLN,PPP1R12C,PRKAR1A,PRPSAP2,SERINC1,SERPINE2,SERPINH1,SNCA,SPR,SYNPO2,TPM1,TTN,UCHL1,YWHAE
GO:0042053	regulation of dopamine metabolic process	3	20	0.0182	ENSP00000338345,ENSP00000354511,ENSP00000379845	ABAT,COMT,SNCA
GO:0009966	regulation of signal transduction	49	3033	0.0187	ENSP00000052754,ENSP00000217244,ENSP00000225964,ENSP00000246792,ENSP00000248553,ENSP00000261448,ENSP00000261883,ENSP00000262506,ENSP00000262551,ENSP00000264335,ENSP00000269141,ENSP00000284440,ENSP00000300574,ENSP00000304408,ENSP00000304669,ENSP00000310491,ENSP00000311905,ENSP00000325527,ENSP00000327336,ENSP00000327801,ENSP00000331544,ENSP00000337838,ENSP00000338345,ENSP00000339730,ENSP00000346839…	ABAT,ANKRD1,ARHGAP1,ASPN,ATP2B4,BCAP31,BGN,CASQ2,CDH2,CILP,COL1A1,COL3A1,CRK,CSNK2A1,CSNK2A2,CTNNA1,DAG1,DCN,DMD,FBLN1,FBN1,FN1,GSN,HSPB1,ITGB1,JPH2,LTBP4,MYO1C,NCAM1,NPPA,OBSCN,OGN,OPA1,P4HB,PLN,POSTN,RDH11,RRAS,RTN4,SERPINE2,SLC25A5,SNCA,SORBS1,STMN1,TGM2,THBS4,UCHL1,YWHAE,YWHAQ
GO:0071260	cellular response to mechanical stimulus	5	78	0.0192	ENSP00000225964,ENSP00000354490,ENSP00000360762,ENSP00000365663,ENSP00000442600	ANKRD1,ATP1A2,COL1A1,DAG1,NPPA
GO:0043270	positive regulation of ion transport	9	252	0.0193	ENSP00000338345,ENSP00000349320,ENSP00000354923,ENSP00000362071,ENSP00000365663,ENSP00000377710,ENSP00000378199,ENSP00000379845,ENSP00000443495	ABAT,ACTN2,CACNA2D1,DMD,FHL1,HSPA2,JPH2,NPPA,SNCA
GO:0086001	cardiac muscle cell action potential	4	46	0.0194	ENSP00000264335,ENSP00000349320,ENSP00000354490,ENSP00000354923	ATP1A2,CACNA2D1,DMD,YWHAE
GO:0050793	regulation of developmental process	41	2416	0.0195	ENSP00000052754,ENSP00000225964,ENSP00000246792,ENSP00000248553,ENSP00000269141,ENSP00000284031,ENSP00000300026,ENSP00000300574,ENSP00000304408,ENSP00000304669,ENSP00000311905,ENSP00000325527,ENSP00000331544,ENSP00000337838,ENSP00000338345,ENSP00000339730,ENSP00000343690,ENSP00000346839,ENSP00000351022,ENSP00000353590,ENSP00000353654,ENSP00000354681,ENSP00000354923,ENSP00000360762,ENSP00000360882…	AGRN,ANKRD1,ASPN,CDH2,CLTC,COL1A1,COL3A1,COL4A2,COL5A1,CRK,CSRP3,CTNNA1,DAG1,DCN,DDAH1,DMD,DPYSL3,FBLN1,FBN1,FN1,HSPB1,HSPB6,HSPG2,ITGA7,ITGB1,JPH2,LAMA2,LTBP4,MYH10,OBSL1,OPA1,PDLIM5,POSTN,PPIB,RRAS,RTN4,SERPINE2,SNCA,THBS4,TPM1,VIM
GO:0120031	plasma membrane bounded cell projection assembly	12	413	0.0196	ENSP00000211998,ENSP00000248437,ENSP00000264335,ENSP00000341289,ENSP00000348965,ENSP00000353590,ENSP00000354923,ENSP00000358921,ENSP00000362924,ENSP00000371798,ENSP00000379350,ENSP00000443495	ACTN2,ACTR1A,DMD,DYNC1H1,FSCN1,GSN,ITGB1,MYH10,TUBA4A,TUBB4B,VCL,YWHAE
GO:2000649	regulation of sodium ion transmembrane transporter activity	4	47	0.0206	ENSP00000295951,ENSP00000354490,ENSP00000354923,ENSP00000356515	ATP1A2,DMD,SLMAP,UTRN
GO:0032990	cell part morphogenesis	13	474	0.0209	ENSP00000211998,ENSP00000262551,ENSP00000284440,ENSP00000353590,ENSP00000354681,ENSP00000357709,ENSP00000369071,ENSP00000379350,ENSP00000388325,ENSP00000400365,ENSP00000410452,ENSP00000442600,ENSP00000480132	DAG1,ITGB1,LAMA2,LAMB2,MYH10,NCAM1,OGN,OPA1,POSTN,S100A6,STMN1,UCHL1,VCL
GO:0006898	receptor-mediated endocytosis	8	209	0.022	ENSP00000247461,ENSP00000271064,ENSP00000299767,ENSP00000309415,ENSP00000338345,ENSP00000363827,ENSP00000379350,ENSP00000479606	CANX,CLTB,CLTC,HSP90B1,HSPG2,ITGB1,SNCA,TINAGL1
GO:1903532	positive regulation of secretion by cell	11	364	0.022	ENSP00000196371,ENSP00000277865,ENSP00000336762,ENSP00000338345,ENSP00000353590,ENSP00000360762,ENSP00000365663,ENSP00000369071,ENSP00000379845,ENSP00000437073,ENSP00000467141	ABAT,ANG,ANKRD1,GLUD1,MYH10,MYO18A,NPPA,OXCT1,POSTN,SNCA,TTN
GO:0043687	post-translational protein modification	11	365	0.0222	ENSP00000258341,ENSP00000265077,ENSP00000265131,ENSP00000268150,ENSP00000269141,ENSP00000299767,ENSP00000325527,ENSP00000327801,ENSP00000346839,ENSP00000385636,ENSP00000388325	CDH2,FBN1,FN1,HSP90B1,LAMB2,LAMC1,MFGE8,OBSL1,P4HB,TNC,VCAN
GO:0051599	response to hydrostatic pressure	2	5	0.0222	ENSP00000347665,ENSP00000350310	ATP2B4,COL18A1
GO:1902083	negative regulation of peptidyl-cysteine S-nitrosylation	2	5	0.0222	ENSP00000350310,ENSP00000354923	ATP2B4,DMD
GO:1904063	negative regulation of cation transmembrane transport	5	82	0.0224	ENSP00000261448,ENSP00000264335,ENSP00000350132,ENSP00000354490,ENSP00000443495	ACTN2,ATP1A2,CASQ2,PLN,YWHAE
GO:0050708	regulation of protein secretion	12	422	0.0225	ENSP00000196371,ENSP00000277865,ENSP00000331544,ENSP00000336762,ENSP00000346839,ENSP00000353590,ENSP00000360671,ENSP00000360762,ENSP00000369071,ENSP00000379845,ENSP00000437073,ENSP00000467141	ABAT,ANG,ANKRD1,FBLN1,FN1,GLUD1,MYH10,MYO18A,OXCT1,POSTN,SLC25A5,TTN
GO:0055082	cellular chemical homeostasis	16	665	0.0237	ENSP00000261448,ENSP00000262418,ENSP00000264335,ENSP00000299767,ENSP00000310491,ENSP00000338345,ENSP00000349320,ENSP00000350132,ENSP00000350310,ENSP00000354490,ENSP00000354681,ENSP00000355330,ENSP00000362071,ENSP00000392330,ENSP00000402103,ENSP00000431813	ARHGAP1,ATP1A2,ATP2B4,BCAP31,CACNA2D1,CASQ2,CSRP3,HK1,HSP90B1,JPH2,OPA1,PLN,SLC4A1,SNCA,TGM2,YWHAE
GO:0000086	G2/M transition of mitotic cell cycle	6	123	0.0241	ENSP00000248437,ENSP00000264335,ENSP00000341289,ENSP00000348965,ENSP00000357206,ENSP00000358921	ACTR1A,DYNC1H1,NES,TUBA4A,TUBB4B,YWHAE
GO:0071295	cellular response to vitamin	3	23	0.0242	ENSP00000225964,ENSP00000265131,ENSP00000369071	COL1A1,POSTN,TNC
GO:0042592	homeostatic process	28	1491	0.0265	ENSP00000052754,ENSP00000224807,ENSP00000261448,ENSP00000262418,ENSP00000264335,ENSP00000269141,ENSP00000295951,ENSP00000299767,ENSP00000300231,ENSP00000310491,ENSP00000325527,ENSP00000327801,ENSP00000336762,ENSP00000338345,ENSP00000349320,ENSP00000350132,ENSP00000350310,ENSP00000354490,ENSP00000354681,ENSP00000354923,ENSP00000355330,ENSP00000362071,ENSP00000376475,ENSP00000377710,ENSP00000392330…	ANG,ARHGAP1,ATP1A2,ATP2B4,BCAP31,CACNA2D1,CASQ2,CDH2,CSRP3,DCN,DMD,FBN1,FHL1,HK1,HSP90B1,JPH2,MAP1A,OPA1,P4HB,PLN,PRKAR1A,SFXN3,SLC4A1,SLMAP,SNCA,STMN1,TGM2,YWHAE
GO:0048041	focal adhesion assembly	3	24	0.0266	ENSP00000360293,ENSP00000377941,ENSP00000443495	ACTN1,ACTN2,SORBS1
GO:0072583	clathrin-dependent endocytosis	3	24	0.0266	ENSP00000247461,ENSP00000309415,ENSP00000479606	CANX,CLTB,CLTC
GO:0010638	positive regulation of organelle organization	14	552	0.0269	ENSP00000052754,ENSP00000264335,ENSP00000306015,ENSP00000348965,ENSP00000351022,ENSP00000352834,ENSP00000354681,ENSP00000357206,ENSP00000362924,ENSP00000371267,ENSP00000371798,ENSP00000377789,ENSP00000378289,ENSP00000443495	ACTN2,DCN,DYNC1H1,FSCN1,GSN,MYO1C,NES,OPA1,SYNPO,SYNPO2,SYNPO2L,TPM1,YWHAE,YWHAQ
GO:0001101	response to acid chemical	10	323	0.0276	ENSP00000225964,ENSP00000265131,ENSP00000297268,ENSP00000304408,ENSP00000347665,ENSP00000350310,ENSP00000354681,ENSP00000355180,ENSP00000362924,ENSP00000364979	ATP2B4,COL18A1,COL1A1,COL1A2,COL3A1,COL4A1,COL6A1,GSN,OPA1,TNC
GO:0003062	regulation of heart rate by chemical signal	2	6	0.0278	ENSP00000264335,ENSP00000351022	TPM1,YWHAE
GO:0019800	peptide cross-linking via chondroitin 4-sulfate glycosaminoglycan	2	6	0.0278	ENSP00000052754,ENSP00000327336	BGN,DCN
GO:0048050	post-embryonic eye morphogenesis	2	6	0.0278	ENSP00000325527,ENSP00000364685	FBN1,MFAP2
GO:0055065	metal ion homeostasis	14	555	0.0278	ENSP00000224807,ENSP00000261448,ENSP00000264335,ENSP00000299767,ENSP00000310491,ENSP00000338345,ENSP00000349320,ENSP00000350132,ENSP00000350310,ENSP00000354490,ENSP00000355330,ENSP00000362071,ENSP00000392330,ENSP00000431813	ARHGAP1,ATP1A2,ATP2B4,BCAP31,CACNA2D1,CASQ2,CSRP3,HSP90B1,JPH2,PLN,SFXN3,SNCA,TGM2,YWHAE
GO:0007179	transforming growth factor beta receptor signaling pathway	5	88	0.0283	ENSP00000261978,ENSP00000297268,ENSP00000304408,ENSP00000311905,ENSP00000347041	COL1A2,COL3A1,FMOD,LTBP2,LTBP4
GO:0032781	positive regulation of ATPase activity	4	53	0.0284	ENSP00000351022,ENSP00000359799,ENSP00000378199,ENSP00000379210	DNAJB4,HSPA2,MYL3,TPM1
GO:0043436	oxoacid metabolic process	20	943	0.0286	ENSP00000052754,ENSP00000215567,ENSP00000262551,ENSP00000265077,ENSP00000266718,ENSP00000277865,ENSP00000284031,ENSP00000327336,ENSP00000327801,ENSP00000338345,ENSP00000343924,ENSP00000345774,ENSP00000347041,ENSP00000354468,ENSP00000364490,ENSP00000370517,ENSP00000379845,ENSP00000379895,ENSP00000402103,ENSP00000418397	ABAT,ALDH3A2,ALDH4A1,BGN,CYB5R3,DCN,DDAH1,FMOD,GATM,GLUD1,HK1,IVD,LUM,OGN,P4HB,PFKP,PRELP,SNCA,TECR,VCAN
GO:0030206	chondroitin sulfate biosynthetic process	3	25	0.0287	ENSP00000052754,ENSP00000265077,ENSP00000327336	BGN,DCN,VCAN
GO:0006875	cellular metal ion homeostasis	13	499	0.0294	ENSP00000261448,ENSP00000264335,ENSP00000299767,ENSP00000310491,ENSP00000338345,ENSP00000349320,ENSP00000350132,ENSP00000350310,ENSP00000354490,ENSP00000355330,ENSP00000362071,ENSP00000392330,ENSP00000431813	ARHGAP1,ATP1A2,ATP2B4,BCAP31,CACNA2D1,CASQ2,CSRP3,HSP90B1,JPH2,PLN,SNCA,TGM2,YWHAE
GO:0032231	regulation of actin filament bundle assembly	5	89	0.0294	ENSP00000306015,ENSP00000351022,ENSP00000377789,ENSP00000378289,ENSP00000410452	STMN1,SYNPO,SYNPO2,SYNPO2L,TPM1
GO:0017144	drug metabolic process	15	622	0.0296	ENSP00000052754,ENSP00000196371,ENSP00000234454,ENSP00000265077,ENSP00000327336,ENSP00000338345,ENSP00000345774,ENSP00000347507,ENSP00000354490,ENSP00000354511,ENSP00000361512,ENSP00000370517,ENSP00000379895,ENSP00000402103,ENSP00000432083	ALDH3A2,ATP1A2,BGN,COMT,DCN,GATM,HK1,HSPA8,MYH7,OXCT1,PFKP,PRPS1,SNCA,SPR,VCAN
GO:0065007	biological regulation	145	11740	0.0296	ENSP00000052754,ENSP00000196371,ENSP00000211998,ENSP00000216218,ENSP00000217244,ENSP00000224807,ENSP00000225964,ENSP00000227525,ENSP00000234454,ENSP00000246792,ENSP00000247461,ENSP00000248437,ENSP00000248553,ENSP00000256196,ENSP00000258341,ENSP00000261448,ENSP00000261883,ENSP00000261978,ENSP00000262418,ENSP00000262506,ENSP00000262551,ENSP00000263433,ENSP00000264036,ENSP00000264335,ENSP00000265131…	ABAT,ABI3BP,ACTN1,ACTN2,ACTR1A,AGRN,ANG,ANKRD1,ARHGAP1,ASPN,ATP1A2,ATP2B4,BCAP31,BGN,CA1,CACNA2D1,CANX,CASQ2,CDH2,CILP,CLEC3B,CLTC,COL18A1,COL1A1,COL1A2,COL3A1,COL4A1,COL4A2,COL5A1,COL6A3,COMT,CRIP2,CRK,CSNK2A1,CSNK2A2,CSRP3,CTNNA1,DAG1,DCN,DDAH1,DES,DMD,DNAJB4,DPM3,DPT,DPYSL3,DTNA,DYNC1H1,DYNLT3,FAM129A,FBLN1,FBLN5,FBN1,FHL1,FLII,FMOD,FN1,FSCN1,GLUD1,GSN,HBD,HK1,HSP90B1,HSPA2,HSPA8,HSPB1,HSPB2,H…
GO:0032963	collagen metabolic process	4	54	0.0297	ENSP00000225964,ENSP00000360882,ENSP00000407685,ENSP00000434412	COL1A1,COL5A1,SERPINH1,TNXB
GO:0022604	regulation of cell morphogenesis	12	442	0.0301	ENSP00000300574,ENSP00000331544,ENSP00000337838,ENSP00000346839,ENSP00000351022,ENSP00000353590,ENSP00000354681,ENSP00000369071,ENSP00000385636,ENSP00000442600,ENSP00000452120,ENSP00000480359	CRK,DAG1,FBLN1,FN1,ITGA7,MYH10,OBSL1,OPA1,PDLIM5,POSTN,RTN4,TPM1
GO:0008217	regulation of blood pressure	7	177	0.031	ENSP00000284031,ENSP00000297268,ENSP00000351022,ENSP00000354490,ENSP00000365663,ENSP00000369071,ENSP00000379845	ABAT,ATP1A2,COL1A2,DDAH1,NPPA,POSTN,TPM1
GO:0014888	striated muscle adaptation	3	26	0.031	ENSP00000347507,ENSP00000362924,ENSP00000365663	GSN,MYH7,NPPA
GO:0045765	regulation of angiogenesis	9	277	0.031	ENSP00000052754,ENSP00000246792,ENSP00000248553,ENSP00000284031,ENSP00000339730,ENSP00000353654,ENSP00000363827,ENSP00000379350,ENSP00000468057	COL4A2,DCN,DDAH1,HSPB1,HSPB6,HSPG2,ITGB1,RRAS,THBS4
GO:0065003	protein-containing complex assembly	28	1514	0.031	ENSP00000216218,ENSP00000225964,ENSP00000258341,ENSP00000261448,ENSP00000297268,ENSP00000300527,ENSP00000300574,ENSP00000302961,ENSP00000304669,ENSP00000316029,ENSP00000327801,ENSP00000336762,ENSP00000337838,ENSP00000343690,ENSP00000346839,ENSP00000347041,ENSP00000348965,ENSP00000350132,ENSP00000354681,ENSP00000354923,ENSP00000355180,ENSP00000355330,ENSP00000362924,ENSP00000385636,ENSP00000443495…	ACTN2,ANG,CASQ2,CLTC,COL1A1,COL1A2,COL6A1,COL6A2,CRK,CTNNA1,DMD,DPYSL3,DYNC1H1,FMOD,FN1,GSN,HSPA4,LAMC1,OBSL1,OPA1,P4HB,PLN,RTN4,SEC22B,ST13,TGM2,TLN1,TTN
GO:0019722	calcium-mediated signaling	6	132	0.0311	ENSP00000261448,ENSP00000350132,ENSP00000354490,ENSP00000354923,ENSP00000362071,ENSP00000392330	ATP1A2,BCAP31,CASQ2,DMD,JPH2,PLN
GO:0048002	antigen processing and presentation of peptide antigen	6	132	0.0311	ENSP00000247461,ENSP00000348965,ENSP00000358921,ENSP00000392330,ENSP00000463393,ENSP00000479606	ACTR1A,BCAP31,CANX,CLTC,DYNC1H1,SEC22B
GO:2001233	regulation of apoptotic signaling pathway	11	388	0.0315	ENSP00000217244,ENSP00000248553,ENSP00000262506,ENSP00000264335,ENSP00000304669,ENSP00000327801,ENSP00000354681,ENSP00000360671,ENSP00000362924,ENSP00000371267,ENSP00000392330	BCAP31,CSNK2A1,CSNK2A2,CTNNA1,GSN,HSPB1,OPA1,P4HB,SLC25A5,YWHAE,YWHAQ
GO:0055080	cation homeostasis	15	629	0.0318	ENSP00000224807,ENSP00000261448,ENSP00000262418,ENSP00000264335,ENSP00000299767,ENSP00000310491,ENSP00000338345,ENSP00000349320,ENSP00000350132,ENSP00000350310,ENSP00000354490,ENSP00000355330,ENSP00000362071,ENSP00000392330,ENSP00000431813	ARHGAP1,ATP1A2,ATP2B4,BCAP31,CACNA2D1,CASQ2,CSRP3,HSP90B1,JPH2,PLN,SFXN3,SLC4A1,SNCA,TGM2,YWHAE
GO:0032768	regulation of monooxygenase activity	4	56	0.0325	ENSP00000234454,ENSP00000284031,ENSP00000338345,ENSP00000350310	ATP2B4,DDAH1,SNCA,SPR
GO:0048812	neuron projection morphogenesis	12	448	0.0325	ENSP00000211998,ENSP00000262551,ENSP00000284440,ENSP00000353590,ENSP00000357709,ENSP00000369071,ENSP00000379350,ENSP00000388325,ENSP00000400365,ENSP00000410452,ENSP00000442600,ENSP00000480132	DAG1,ITGB1,LAMA2,LAMB2,MYH10,NCAM1,OGN,POSTN,S100A6,STMN1,UCHL1,VCL
GO:0006897	endocytosis	13	510	0.033	ENSP00000247461,ENSP00000268150,ENSP00000271064,ENSP00000299767,ENSP00000300574,ENSP00000309415,ENSP00000338345,ENSP00000352834,ENSP00000355330,ENSP00000362924,ENSP00000363827,ENSP00000379350,ENSP00000479606	CANX,CLTB,CLTC,CRK,GSN,HSP90B1,HSPG2,ITGB1,MFGE8,MYO1C,SNCA,TGM2,TINAGL1
GO:0009065	glutamine family amino acid catabolic process	3	27	0.033	ENSP00000277865,ENSP00000284031,ENSP00000364490	ALDH4A1,DDAH1,GLUD1
GO:0030003	cellular cation homeostasis	14	570	0.033	ENSP00000261448,ENSP00000262418,ENSP00000264335,ENSP00000299767,ENSP00000310491,ENSP00000338345,ENSP00000349320,ENSP00000350132,ENSP00000350310,ENSP00000354490,ENSP00000355330,ENSP00000362071,ENSP00000392330,ENSP00000431813	ARHGAP1,ATP1A2,ATP2B4,BCAP31,CACNA2D1,CASQ2,CSRP3,HSP90B1,JPH2,PLN,SLC4A1,SNCA,TGM2,YWHAE
GO:0038089	positive regulation of cell migration by vascular endothelial growth factor signaling pathway	2	7	0.033	ENSP00000248553,ENSP00000352834	HSPB1,MYO1C
GO:0048583	regulation of response to stimulus	58	3882	0.033	ENSP00000052754,ENSP00000196371,ENSP00000217244,ENSP00000225964,ENSP00000246792,ENSP00000248553,ENSP00000261448,ENSP00000261883,ENSP00000262506,ENSP00000262551,ENSP00000264335,ENSP00000269141,ENSP00000284031,ENSP00000284440,ENSP00000297268,ENSP00000299767,ENSP00000300574,ENSP00000304408,ENSP00000304669,ENSP00000310491,ENSP00000311905,ENSP00000325527,ENSP00000327336,ENSP00000327801,ENSP00000331544…	ABAT,ANKRD1,ARHGAP1,ASPN,ATP1A2,ATP2B4,BCAP31,BGN,CASQ2,CDH2,CILP,COL1A1,COL1A2,COL3A1,CRK,CSNK2A1,CSNK2A2,CTNNA1,DAG1,DCN,DDAH1,DMD,FBLN1,FBLN5,FBN1,FN1,GSN,HSP90B1,HSPA8,HSPB1,ITGB1,JPH2,LTBP4,MYH7,MYO1C,NCAM1,NPPA,OBSCN,OGN,OPA1,OXCT1,P4HB,PLN,POSTN,RDH11,RRAS,RTN4,SERPINE2,SLC25A5,SNCA,SORBS1,STMN1,TGM2,THBS4,UCHL1,UTRN,YWHAE,YWHAQ
GO:1902905	positive regulation of supramolecular fiber organization	7	180	0.033	ENSP00000306015,ENSP00000351022,ENSP00000352834,ENSP00000362924,ENSP00000377789,ENSP00000378289,ENSP00000443495	ACTN2,GSN,MYO1C,SYNPO,SYNPO2,SYNPO2L,TPM1
GO:0001654	eye development	10	339	0.0348	ENSP00000325527,ENSP00000350310,ENSP00000353590,ENSP00000354681,ENSP00000357206,ENSP00000360882,ENSP00000364685,ENSP00000364979,ENSP00000388325,ENSP00000446007	ATP2B4,COL4A1,COL5A1,FBN1,LAMB2,MFAP2,MYH10,NES,OPA1,VIM
GO:0042493	response to drug	19	900	0.0348	ENSP00000196371,ENSP00000225964,ENSP00000261448,ENSP00000265131,ENSP00000285381,ENSP00000299767,ENSP00000300574,ENSP00000304669,ENSP00000338345,ENSP00000347665,ENSP00000354490,ENSP00000354511,ENSP00000354681,ENSP00000360671,ENSP00000360762,ENSP00000362924,ENSP00000368678,ENSP00000369654,ENSP00000379845	ABAT,AGRN,ANKRD1,ATP1A2,CA3,CASQ2,COL18A1,COL1A1,COMT,CRK,CTNNA1,GSN,HBD,HSP90B1,OPA1,OXCT1,SLC25A5,SNCA,TNC
GO:1902532	negative regulation of intracellular signal transduction	13	514	0.0348	ENSP00000052754,ENSP00000248553,ENSP00000261448,ENSP00000284440,ENSP00000327336,ENSP00000331544,ENSP00000350310,ENSP00000354681,ENSP00000364694,ENSP00000379350,ENSP00000410452,ENSP00000415786,ENSP00000442600	ASPN,ATP2B4,BGN,CASQ2,DAG1,DCN,FBLN1,HSPB1,ITGB1,OPA1,SERPINE2,STMN1,UCHL1
GO:0050848	regulation of calcium-mediated signaling	5	95	0.0351	ENSP00000261448,ENSP00000350132,ENSP00000350310,ENSP00000354923,ENSP00000362071	ATP2B4,CASQ2,DMD,JPH2,PLN
GO:0097711	ciliary basal body-plasma membrane docking	5	95	0.0351	ENSP00000248437,ENSP00000264335,ENSP00000341289,ENSP00000348965,ENSP00000358921	ACTR1A,DYNC1H1,TUBA4A,TUBB4B,YWHAE
GO:0005975	carbohydrate metabolic process	12	457	0.036	ENSP00000216962,ENSP00000237642,ENSP00000317904,ENSP00000325527,ENSP00000340466,ENSP00000354468,ENSP00000357384,ENSP00000370517,ENSP00000378769,ENSP00000379678,ENSP00000402103,ENSP00000410833	CYB5R3,DPM3,FBN1,GANAB,GBE1,GYS1,HK1,PFKP,PGM5,PPP1CB,PYGB,STBD1
GO:0045185	maintenance of protein location	5	96	0.0363	ENSP00000316029,ENSP00000325527,ENSP00000362924,ENSP00000402103,ENSP00000442600	DAG1,FBN1,GSN,HK1,TLN1
GO:0003007	heart morphogenesis	8	235	0.0364	ENSP00000337838,ENSP00000347507,ENSP00000351022,ENSP00000360762,ENSP00000360882,ENSP00000379210,ENSP00000386840,ENSP00000467141	ANKRD1,COL5A1,MYH7,MYL3,RTN4,TPM1,TTN,XIRP2
GO:0098771	inorganic ion homeostasis	15	643	0.0364	ENSP00000224807,ENSP00000261448,ENSP00000262418,ENSP00000264335,ENSP00000299767,ENSP00000310491,ENSP00000338345,ENSP00000349320,ENSP00000350132,ENSP00000350310,ENSP00000354490,ENSP00000355330,ENSP00000362071,ENSP00000392330,ENSP00000431813	ARHGAP1,ATP1A2,ATP2B4,BCAP31,CACNA2D1,CASQ2,CSRP3,HSP90B1,JPH2,PLN,SFXN3,SLC4A1,SNCA,TGM2,YWHAE
GO:0110053	regulation of actin filament organization	8	235	0.0364	ENSP00000306015,ENSP00000351022,ENSP00000352834,ENSP00000362924,ENSP00000377789,ENSP00000378289,ENSP00000410452,ENSP00000443495	ACTN2,GSN,MYO1C,STMN1,SYNPO,SYNPO2,SYNPO2L,TPM1
GO:1902531	regulation of intracellular signal transduction	31	1764	0.0364	ENSP00000052754,ENSP00000217244,ENSP00000246792,ENSP00000248553,ENSP00000261448,ENSP00000262506,ENSP00000269141,ENSP00000284440,ENSP00000300574,ENSP00000304408,ENSP00000310491,ENSP00000327336,ENSP00000327801,ENSP00000331544,ENSP00000337838,ENSP00000346839,ENSP00000350132,ENSP00000350310,ENSP00000354681,ENSP00000354923,ENSP00000355330,ENSP00000360762,ENSP00000362071,ENSP00000364694,ENSP00000365663…	ANKRD1,ARHGAP1,ASPN,ATP2B4,BCAP31,BGN,CASQ2,CDH2,COL3A1,CRK,CSNK2A1,CSNK2A2,DAG1,DCN,DMD,FBLN1,FN1,HSPB1,ITGB1,JPH2,NPPA,OBSCN,OPA1,P4HB,PLN,RRAS,RTN4,SERPINE2,STMN1,TGM2,UCHL1
GO:0051480	regulation of cytosolic calcium ion concentration	9	289	0.0371	ENSP00000264335,ENSP00000338345,ENSP00000349320,ENSP00000350132,ENSP00000350310,ENSP00000354490,ENSP00000355330,ENSP00000362071,ENSP00000392330	ATP1A2,ATP2B4,BCAP31,CACNA2D1,JPH2,PLN,SNCA,TGM2,YWHAE
GO:0051491	positive regulation of filopodium assembly	3	29	0.0374	ENSP00000343690,ENSP00000368678,ENSP00000371798	AGRN,DPYSL3,FSCN1
GO:0032233	positive regulation of actin filament bundle assembly	4	60	0.038	ENSP00000306015,ENSP00000351022,ENSP00000377789,ENSP00000378289	SYNPO,SYNPO2,SYNPO2L,TPM1
GO:1990138	neuron projection extension	4	60	0.038	ENSP00000211998,ENSP00000369071,ENSP00000379350,ENSP00000388325	ITGB1,LAMB2,POSTN,VCL
GO:0001778	plasma membrane repair	2	8	0.0381	ENSP00000353590,ENSP00000386881	DYSF,MYH10
GO:0044829	positive regulation by host of viral genome replication	2	8	0.0381	ENSP00000300026,ENSP00000432083	HSPA8,PPIB
GO:0051014	actin filament severing	2	8	0.0381	ENSP00000324573,ENSP00000362924	FLII,GSN
GO:0060284	regulation of cell development	18	846	0.0385	ENSP00000269141,ENSP00000300574,ENSP00000304408,ENSP00000304669,ENSP00000325527,ENSP00000331544,ENSP00000337838,ENSP00000343690,ENSP00000346839,ENSP00000354681,ENSP00000354923,ENSP00000360762,ENSP00000369071,ENSP00000385636,ENSP00000415786,ENSP00000442600,ENSP00000446007,ENSP00000480359	ANKRD1,CDH2,COL3A1,CRK,CTNNA1,DAG1,DMD,DPYSL3,FBLN1,FBN1,FN1,OBSL1,OPA1,PDLIM5,POSTN,RTN4,SERPINE2,VIM
GO:0007420	brain development	15	650	0.0386	ENSP00000196371,ENSP00000262506,ENSP00000264335,ENSP00000269141,ENSP00000304408,ENSP00000337838,ENSP00000350310,ENSP00000353590,ENSP00000357206,ENSP00000363827,ENSP00000364979,ENSP00000379350,ENSP00000379845,ENSP00000410452,ENSP00000415786	ABAT,ATP2B4,CDH2,COL3A1,COL4A1,CSNK2A2,HSPG2,ITGB1,MYH10,NES,OXCT1,RTN4,SERPINE2,STMN1,YWHAE
GO:1903827	regulation of cellular protein localization	12	465	0.0393	ENSP00000264335,ENSP00000269141,ENSP00000300231,ENSP00000337838,ENSP00000352834,ENSP00000360293,ENSP00000362924,ENSP00000371267,ENSP00000379350,ENSP00000392330,ENSP00000443495,ENSP00000479606	ACTN2,BCAP31,CDH2,CLTC,GSN,ITGB1,MAP1A,MYO1C,RTN4,SORBS1,YWHAE,YWHAQ
GO:0008360	regulation of cell shape	6	143	0.0403	ENSP00000300574,ENSP00000346839,ENSP00000351022,ENSP00000353590,ENSP00000442600,ENSP00000452120	CRK,DAG1,FN1,ITGA7,MYH10,TPM1
GO:0019221	cytokine-mediated signaling pathway	15	655	0.0409	ENSP00000052754,ENSP00000247461,ENSP00000297268,ENSP00000299767,ENSP00000300574,ENSP00000327336,ENSP00000327801,ENSP00000346839,ENSP00000364694,ENSP00000371798,ENSP00000379350,ENSP00000430656,ENSP00000432083,ENSP00000446007,ENSP00000480132	ASPN,BGN,CA1,CANX,COL1A2,CRK,DCN,FN1,FSCN1,HSP90B1,HSPA8,ITGB1,NCAM1,P4HB,VIM
GO:1900078	positive regulation of cellular response to insulin stimulus	3	31	0.043	ENSP00000352834,ENSP00000354681,ENSP00000360293	MYO1C,OPA1,SORBS1
GO:0014823	response to activity	4	63	0.0434	ENSP00000196371,ENSP00000353654,ENSP00000354681,ENSP00000369071	COL4A2,OPA1,OXCT1,POSTN
GO:2001259	positive regulation of cation channel activity	4	63	0.0434	ENSP00000349320,ENSP00000362071,ENSP00000365663,ENSP00000443495	ACTN2,CACNA2D1,JPH2,NPPA
GO:0007162	negative regulation of cell adhesion	8	245	0.0438	ENSP00000225964,ENSP00000265131,ENSP00000331544,ENSP00000369071,ENSP00000376475,ENSP00000379845,ENSP00000415786,ENSP00000416330	ABAT,COL1A1,FBLN1,POSTN,PRKAR1A,SERPINE2,TGFBI,TNC
GO:0035295	tube development	17	793	0.0443	ENSP00000264036,ENSP00000265131,ENSP00000268150,ENSP00000269141,ENSP00000304408,ENSP00000336762,ENSP00000337838,ENSP00000346839,ENSP00000347665,ENSP00000353654,ENSP00000355330,ENSP00000363827,ENSP00000364979,ENSP00000379350,ENSP00000415786,ENSP00000416330,ENSP00000442600	ANG,CDH2,COL18A1,COL3A1,COL4A1,COL4A2,DAG1,FN1,HSPG2,ITGB1,MCAM,MFGE8,RTN4,SERPINE2,TGFBI,TGM2,TNC
GO:0019896	axonal transport of mitochondrion	2	9	0.0447	ENSP00000284440,ENSP00000354681	OPA1,UCHL1
GO:0032471	negative regulation of endoplasmic reticulum calcium ion concentration	2	9	0.0447	ENSP00000355330,ENSP00000392330	BCAP31,TGM2
GO:0032507	maintenance of protein location in cell	4	64	0.0447	ENSP00000316029,ENSP00000362924,ENSP00000402103,ENSP00000442600	DAG1,GSN,HK1,TLN1
GO:0033240	positive regulation of cellular amine metabolic process	2	9	0.0447	ENSP00000354511,ENSP00000379845	ABAT,COMT
GO:0033622	integrin activation	2	9	0.0447	ENSP00000316029,ENSP00000346839	FN1,TLN1
GO:0034199	activation of protein kinase A activity	2	9	0.0447	ENSP00000325527,ENSP00000376475	FBN1,PRKAR1A
GO:0043589	skin morphogenesis	2	9	0.0447	ENSP00000225964,ENSP00000297268	COL1A1,COL1A2
GO:0048251	elastic fiber assembly	2	9	0.0447	ENSP00000345008,ENSP00000407685	FBLN5,TNXB
GO:1901894	regulation of calcium-transporting ATPase activity	2	9	0.0447	ENSP00000350132,ENSP00000378199	HSPA2,PLN
GO:1990314	cellular response to insulin-like growth factor stimulus	2	9	0.0447	ENSP00000300574,ENSP00000325527	CRK,FBN1
GO:2000026	regulation of multicellular organismal development	32	1876	0.0447	ENSP00000052754,ENSP00000225964,ENSP00000246792,ENSP00000248553,ENSP00000269141,ENSP00000284031,ENSP00000304408,ENSP00000304669,ENSP00000325527,ENSP00000337838,ENSP00000338345,ENSP00000339730,ENSP00000343690,ENSP00000346839,ENSP00000353654,ENSP00000354681,ENSP00000354923,ENSP00000360762,ENSP00000360882,ENSP00000362071,ENSP00000363827,ENSP00000364694,ENSP00000368678,ENSP00000379350,ENSP00000385636…	AGRN,ANKRD1,ASPN,CDH2,CLTC,COL1A1,COL3A1,COL4A2,COL5A1,CTNNA1,DAG1,DCN,DDAH1,DMD,DPYSL3,FBN1,FN1,HSPB1,HSPB6,HSPG2,ITGB1,JPH2,LAMA2,OBSL1,OPA1,PDLIM5,RRAS,RTN4,SERPINE2,SNCA,THBS4,VIM
GO:2000647	negative regulation of stem cell proliferation	2	9	0.0447	ENSP00000304669,ENSP00000331544	CTNNA1,FBLN1
GO:2001135	regulation of endocytic recycling	2	9	0.0447	ENSP00000310491,ENSP00000443495	ACTN2,ARHGAP1
GO:0071229	cellular response to acid chemical	7	196	0.0448	ENSP00000225964,ENSP00000265131,ENSP00000297268,ENSP00000304408,ENSP00000354681,ENSP00000355180,ENSP00000364979	COL1A1,COL1A2,COL3A1,COL4A1,COL6A1,OPA1,TNC
GO:0044087	regulation of cellular component biogenesis	18	867	0.0463	ENSP00000306015,ENSP00000338345,ENSP00000343690,ENSP00000348965,ENSP00000351022,ENSP00000352834,ENSP00000353375,ENSP00000362924,ENSP00000368678,ENSP00000371798,ENSP00000377789,ENSP00000378199,ENSP00000378289,ENSP00000410452,ENSP00000432083,ENSP00000442600,ENSP00000463393,ENSP00000480359	AGRN,DAG1,DPYSL3,DYNC1H1,FSCN1,GSN,HSPA2,HSPA8,MAP4,MYO1C,PDLIM5,SEC22B,SNCA,STMN1,SYNPO,SYNPO2,SYNPO2L,TPM1
GO:0051248	negative regulation of protein metabolic process	21	1075	0.0465	ENSP00000052754,ENSP00000217244,ENSP00000248553,ENSP00000262506,ENSP00000264335,ENSP00000284440,ENSP00000295550,ENSP00000300231,ENSP00000327336,ENSP00000331544,ENSP00000336762,ENSP00000338345,ENSP00000350310,ENSP00000354923,ENSP00000356481,ENSP00000363827,ENSP00000364694,ENSP00000376475,ENSP00000415786,ENSP00000434412,ENSP00000442600	ANG,ASPN,ATP2B4,BGN,COL6A3,CSNK2A1,CSNK2A2,DAG1,DCN,DMD,FAM129A,FBLN1,HSPB1,HSPG2,MAP1A,PRKAR1A,SERPINE2,SERPINH1,SNCA,UCHL1,YWHAE
GO:0014037	Schwann cell differentiation	3	33	0.048	ENSP00000388325,ENSP00000400365,ENSP00000442600	DAG1,LAMA2,LAMB2
GO:0098659	inorganic cation import across plasma membrane	4	66	0.0481	ENSP00000310491,ENSP00000349320,ENSP00000350310,ENSP00000354490	ARHGAP1,ATP1A2,ATP2B4,CACNA2D1
GO:0001933	negative regulation of protein phosphorylation	11	422	0.0484	ENSP00000052754,ENSP00000248553,ENSP00000284440,ENSP00000327336,ENSP00000331544,ENSP00000338345,ENSP00000354923,ENSP00000356481,ENSP00000364694,ENSP00000376475,ENSP00000442600	ASPN,BGN,DAG1,DCN,DMD,FAM129A,FBLN1,HSPB1,PRKAR1A,SNCA,UCHL1
GO:0008104	protein localization	33	1966	0.0484	ENSP00000211998,ENSP00000225964,ENSP00000247461,ENSP00000248553,ENSP00000261978,ENSP00000264335,ENSP00000269141,ENSP00000290158,ENSP00000295951,ENSP00000299767,ENSP00000300231,ENSP00000302961,ENSP00000304376,ENSP00000304669,ENSP00000309415,ENSP00000310491,ENSP00000316029,ENSP00000325527,ENSP00000345008,ENSP00000352834,ENSP00000354923,ENSP00000362924,ENSP00000368678,ENSP00000385636,ENSP00000392330…	ACTN2,AGRN,ARHGAP1,BCAP31,CANX,CDH2,CLTB,CLTC,COL1A1,CSRP3,CTNNA1,DAG1,DMD,FBLN5,FBN1,GSN,HK1,HSP90B1,HSPA4,HSPA8,HSPB1,KPNB1,LTBP2,MAP1A,MYO1C,OBSCN,OBSL1,RAB24,SEC22B,SLMAP,TLN1,VCL,YWHAE
GO:0072330	monocarboxylic acid biosynthetic process	7	200	0.0486	ENSP00000052754,ENSP00000215567,ENSP00000265077,ENSP00000327336,ENSP00000370517,ENSP00000379845,ENSP00000402103	ABAT,BGN,DCN,HK1,PFKP,TECR,VCAN
GO:1901566	organonitrogen compound biosynthetic process	25	1370	0.0494	ENSP00000052754,ENSP00000215567,ENSP00000234454,ENSP00000262551,ENSP00000265077,ENSP00000266718,ENSP00000277865,ENSP00000327336,ENSP00000338345,ENSP00000343924,ENSP00000345774,ENSP00000347041,ENSP00000354923,ENSP00000357384,ENSP00000360644,ENSP00000361512,ENSP00000363827,ENSP00000365663,ENSP00000366156,ENSP00000368678,ENSP00000370517,ENSP00000379845,ENSP00000379895,ENSP00000402103,ENSP00000443216	ABAT,AGRN,ALDH3A2,BGN,DCN,DMD,DPM1,DPM3,FMOD,GATM,GLUD1,HK1,HSPG2,LUM,NPPA,OGN,PFKP,PRELP,PRPS1,SNCA,SPR,SRM,TECR,TMEM258,VCAN
GO:0032269	negative regulation of cellular protein metabolic process	20	1014	0.0499	ENSP00000052754,ENSP00000217244,ENSP00000248553,ENSP00000262506,ENSP00000264335,ENSP00000284440,ENSP00000295550,ENSP00000300231,ENSP00000327336,ENSP00000331544,ENSP00000336762,ENSP00000338345,ENSP00000350310,ENSP00000354923,ENSP00000356481,ENSP00000364694,ENSP00000376475,ENSP00000415786,ENSP00000434412,ENSP00000442600	ANG,ASPN,ATP2B4,BGN,COL6A3,CSNK2A1,CSNK2A2,DAG1,DCN,DMD,FAM129A,FBLN1,HSPB1,MAP1A,PRKAR1A,SERPINE2,SERPINH1,SNCA,UCHL1,YWHAE

## Sheet: Supplementary Table 4C
ID term	term description	observed gene count	background gene count	false discovery rate	matching proteins in your network (IDs)	matching proteins in your network (labels)
GO:0044281	small molecule metabolic process	106	1779	6.08e-46	ENSP00000005178,ENSP00000215565,ENSP00000216185,ENSP00000220764,ENSP00000221418,ENSP00000221476,ENSP00000222553,ENSP00000226253,ENSP00000228740,ENSP00000231887,ENSP00000236959,ENSP00000241337,ENSP00000253382,ENSP00000255381,ENSP00000258424,ENSP00000259037,ENSP00000261733,ENSP00000262030,ENSP00000262878,ENSP00000264932,ENSP00000265395,ENSP00000265462,ENSP00000265594,ENSP00000265838,ENSP00000266041…	AASS,ACAA2,ACAD9,ACADVL,ACAT1,ACSF2,ACSL1,ACSS1,ACSS2,ACSS3,ADCK3,ADH1B,ADSSL1,ALDH1A1,ALDH2,ALDH5A1,ALDH7A1,ALDOA,ALDOC,ATIC,ATP5A1,ATP5B,ATP5J,ATP6V1A,BCO2,CKB,CKM,CKMT2,COX5A,COX5B,CRAT,DBI,DECR1,ECH1,EHHADH,EPHX2,EPRS,ETFDH,FABP3,FABP5,GAMT,GC,GOT1,GPD1,GPD1L,GPD2,GPI,GPT,GSTM2,HADHA,HIBADH,HINT1,HMGCL,HSD17B4,IDH1,IDH2,ITIH4,LARS,LDHA,LDHB,LSS,LTA4H,MCCC1,MCCC2,ME3,MFN1,MPI,MT-CO2,MUT,MYH4,M…
GO:0017144	drug metabolic process	66	622	6.95e-40	ENSP00000215565,ENSP00000221476,ENSP00000226253,ENSP00000253382,ENSP00000255381,ENSP00000258424,ENSP00000259037,ENSP00000261733,ENSP00000262030,ENSP00000264932,ENSP00000265462,ENSP00000265594,ENSP00000265838,ENSP00000266544,ENSP00000269298,ENSP00000270142,ENSP00000273398,ENSP00000274813,ENSP00000297283,ENSP00000297785,ENSP00000299198,ENSP00000301457,ENSP00000306606,ENSP00000314649,ENSP00000315774…	AASS,ACAT1,ACSL1,ACSS1,ACSS2,ACSS3,ADH1B,ADSSL1,ALDH1A1,ALDH2,ALDH5A1,ALDOA,ALDOC,ATP5A1,ATP5B,ATP5J,ATP6V1A,CKB,CKM,CKMT2,COX5A,COX5B,EPHX2,GAMT,GPI,HMGCL,HSD17B4,IDH1,IDH2,LDHA,MAOB,MCCC1,MCCC2,ME3,MT-CO2,MUT,MYH4,MYH6,NDUFA5,NDUFA7,NDUFA8,NDUFA9,NDUFB5,NDUFB6,NDUFB7,NDUFS1,NDUFS2,NDUFS5,NDUFS8,NDUFV1,PCCA,PCCB,PFKM,PGAM2,PKM,PRDX5,PRDX6,SAT2,SDHA,SDHC,SOD1,SUCLA2,SUCLG1,SUCLG2,UQCC3,UQCR10
GO:0006091	generation of precursor metabolites and energy	53	388	2.63e-36	ENSP00000164139,ENSP00000215565,ENSP00000226253,ENSP00000253382,ENSP00000258424,ENSP00000259037,ENSP00000261733,ENSP00000262030,ENSP00000264932,ENSP00000265838,ENSP00000266544,ENSP00000281456,ENSP00000292907,ENSP00000297283,ENSP00000297785,ENSP00000301149,ENSP00000301457,ENSP00000306606,ENSP00000308610,ENSP00000314649,ENSP00000315774,ENSP00000316924,ENSP00000317780,ENSP00000320171,ENSP00000322450…	AASS,ACADVL,ACAT1,ACSS1,ACSS2,ACSS3,ADH1B,ALDH1A1,ALDH2,ALDH5A1,ALDOA,ALDOC,ATP5A1,ATP5B,ATP5J,COX5A,COX5B,COX7A1,ETFDH,GPD1,GPD2,GPI,HMGCL,IDH1,IDH2,LDHA,MAOB,ME3,MT-CO2,NDUFA5,NDUFA7,NDUFA8,NDUFA9,NDUFB5,NDUFB6,NDUFB7,NDUFS1,NDUFS2,NDUFS5,NDUFS8,NDUFV1,PFKM,PGAM2,PKM,PYGM,SDHA,SDHC,SLC25A4,SUCLA2,SUCLG1,SUCLG2,UQCC3,UQCR10
GO:0055114	oxidation-reduction process	72	923	5.15e-36	ENSP00000164139,ENSP00000215565,ENSP00000216185,ENSP00000220764,ENSP00000221418,ENSP00000226253,ENSP00000231887,ENSP00000241337,ENSP00000253382,ENSP00000258424,ENSP00000259037,ENSP00000261733,ENSP00000264613,ENSP00000264932,ENSP00000265395,ENSP00000265462,ENSP00000265838,ENSP00000266544,ENSP00000270142,ENSP00000273550,ENSP00000282541,ENSP00000285093,ENSP00000292907,ENSP00000297283,ENSP00000297785…	AASS,ACAA2,ACAD9,ACADVL,ACAT1,ACSS1,ACSS2,ADH1B,ALDH1A1,ALDH2,ALDH5A1,ALDH7A1,ALDH9A1,ALDOA,ALDOC,BCO2,CHDH,COX5A,COX5B,COX7A1,CP,CRAT,DECR1,ECH1,EHHADH,ETFDH,FTH1,GPD1,GPD1L,GPD2,GPI,GSTM2,HADHA,HIBADH,HSD17B4,HSDL2,IDH1,IDH2,LDHA,LDHB,MAOB,ME3,MT-CO2,NDUFA13,NDUFA5,NDUFA7,NDUFA8,NDUFA9,NDUFB5,NDUFB6,NDUFB7,NDUFS1,NDUFS2,NDUFS5,NDUFS8,NDUFV1,PFKM,PGAM2,PKM,PRDX5,PRDX6,PYGM,SDHA,SDHC,SELENBP1,SOD…
GO:0009117	nucleotide metabolic process	60	576	9.54e-36	ENSP00000215565,ENSP00000222553,ENSP00000226253,ENSP00000236959,ENSP00000253382,ENSP00000255381,ENSP00000258424,ENSP00000259037,ENSP00000262030,ENSP00000262878,ENSP00000264932,ENSP00000265462,ENSP00000265838,ENSP00000266544,ENSP00000273398,ENSP00000282541,ENSP00000297283,ENSP00000301149,ENSP00000301457,ENSP00000304229,ENSP00000308610,ENSP00000315774,ENSP00000316924,ENSP00000317780,ENSP00000320171…	AASS,ACAT1,ACSF2,ACSL1,ACSS1,ACSS2,ADSSL1,ALDOA,ALDOC,ATIC,ATP5A1,ATP5B,ATP5J,ATP6V1A,COX5A,COX5B,DBI,GPD1,GPD1L,GPD2,GPI,HINT1,HMGCL,HSD17B4,IDH1,IDH2,LDHA,LDHB,MCCC2,MFN1,MT-CO2,MYH4,MYH6,NAMPT,NAPRT,NDUFA5,NDUFA7,NDUFA8,NDUFA9,NDUFB5,NDUFB6,NDUFB7,NDUFS1,NDUFS2,NDUFS5,NDUFS8,NDUFV1,NUDT4,PDE3A,PFKM,PGAM2,PKM,PRDX5,SAMHD1,SDHA,SDHC,SUCLA2,SUCLG2,UQCC3,UQCR10
GO:0055086	nucleobase-containing small molecule metabolic process	62	662	9.42e-35	ENSP00000215565,ENSP00000222553,ENSP00000226253,ENSP00000236959,ENSP00000253382,ENSP00000255381,ENSP00000258424,ENSP00000259037,ENSP00000262030,ENSP00000262878,ENSP00000264932,ENSP00000265462,ENSP00000265838,ENSP00000266544,ENSP00000273398,ENSP00000282541,ENSP00000297283,ENSP00000301149,ENSP00000301457,ENSP00000304229,ENSP00000308610,ENSP00000315774,ENSP00000316924,ENSP00000317780,ENSP00000318318…	AASS,ACAT1,ACSF2,ACSL1,ACSS1,ACSS2,ADSSL1,ALDOA,ALDOC,ATIC,ATP5A1,ATP5B,ATP5J,ATP6V1A,COX5A,COX5B,DBI,GAMT,GPD1,GPD1L,GPD2,GPI,HINT1,HMGCL,HSD17B4,IDH1,IDH2,LDHA,LDHB,MCCC2,MFN1,MPI,MT-CO2,MYH4,MYH6,NAMPT,NAPRT,NDUFA5,NDUFA7,NDUFA8,NDUFA9,NDUFB5,NDUFB6,NDUFB7,NDUFS1,NDUFS2,NDUFS5,NDUFS8,NDUFV1,NUDT4,PDE3A,PFKM,PGAM2,PKM,PRDX5,SAMHD1,SDHA,SDHC,SUCLA2,SUCLG2,UQCC3,UQCR10
GO:0006163	purine nucleotide metabolic process	51	442	5.92e-32	ENSP00000215565,ENSP00000226253,ENSP00000236959,ENSP00000253382,ENSP00000255381,ENSP00000258424,ENSP00000259037,ENSP00000262030,ENSP00000262878,ENSP00000264932,ENSP00000265838,ENSP00000266544,ENSP00000273398,ENSP00000297283,ENSP00000301457,ENSP00000304229,ENSP00000315774,ENSP00000316924,ENSP00000317780,ENSP00000320171,ENSP00000322450,ENSP00000332887,ENSP00000333019,ENSP00000338352,ENSP00000343657…	AASS,ACAT1,ACSF2,ACSL1,ACSS1,ACSS2,ADSSL1,ALDOA,ALDOC,ATIC,ATP5A1,ATP5B,ATP5J,ATP6V1A,COX5A,COX5B,DBI,GPI,HINT1,HMGCL,HSD17B4,LDHA,MCCC2,MFN1,MT-CO2,MYH4,MYH6,NDUFA5,NDUFA7,NDUFA8,NDUFA9,NDUFB5,NDUFB6,NDUFB7,NDUFS1,NDUFS2,NDUFS5,NDUFS8,NDUFV1,NUDT4,PDE3A,PFKM,PGAM2,PKM,SAMHD1,SDHA,SDHC,SUCLA2,SUCLG2,UQCC3,UQCR10
GO:0009150	purine ribonucleotide metabolic process	50	425	1.11e-31	ENSP00000215565,ENSP00000226253,ENSP00000236959,ENSP00000253382,ENSP00000255381,ENSP00000258424,ENSP00000259037,ENSP00000262030,ENSP00000264932,ENSP00000265838,ENSP00000266544,ENSP00000273398,ENSP00000297283,ENSP00000301457,ENSP00000304229,ENSP00000315774,ENSP00000316924,ENSP00000317780,ENSP00000320171,ENSP00000322450,ENSP00000332887,ENSP00000333019,ENSP00000338352,ENSP00000343657,ENSP00000345771…	AASS,ACAT1,ACSF2,ACSL1,ACSS1,ACSS2,ADSSL1,ALDOA,ALDOC,ATIC,ATP5A1,ATP5B,ATP5J,ATP6V1A,COX5A,COX5B,DBI,GPI,HINT1,HMGCL,HSD17B4,LDHA,MCCC2,MFN1,MT-CO2,MYH4,MYH6,NDUFA5,NDUFA7,NDUFA8,NDUFA9,NDUFB5,NDUFB6,NDUFB7,NDUFS1,NDUFS2,NDUFS5,NDUFS8,NDUFV1,NUDT4,PDE3A,PFKM,PGAM2,PKM,SDHA,SDHC,SUCLA2,SUCLG2,UQCC3,UQCR10
GO:0072521	purine-containing compound metabolic process	52	478	1.37e-31	ENSP00000215565,ENSP00000226253,ENSP00000236959,ENSP00000253382,ENSP00000255381,ENSP00000258424,ENSP00000259037,ENSP00000262030,ENSP00000262878,ENSP00000264932,ENSP00000265838,ENSP00000266544,ENSP00000273398,ENSP00000297283,ENSP00000301457,ENSP00000304229,ENSP00000315774,ENSP00000316924,ENSP00000317780,ENSP00000320171,ENSP00000322450,ENSP00000332887,ENSP00000333019,ENSP00000338352,ENSP00000343657…	AASS,ACAT1,ACSF2,ACSL1,ACSS1,ACSS2,ADSSL1,ALDOA,ALDOC,ATIC,ATP5A1,ATP5B,ATP5J,ATP6V1A,COX5A,COX5B,DBI,GAMT,GPI,HINT1,HMGCL,HSD17B4,LDHA,MCCC2,MFN1,MT-CO2,MYH4,MYH6,NDUFA5,NDUFA7,NDUFA8,NDUFA9,NDUFB5,NDUFB6,NDUFB7,NDUFS1,NDUFS2,NDUFS5,NDUFS8,NDUFV1,NUDT4,PDE3A,PFKM,PGAM2,PKM,SAMHD1,SDHA,SDHC,SUCLA2,SUCLG2,UQCC3,UQCR10
GO:0019637	organophosphate metabolic process	66	1011	1.04e-28	ENSP00000215565,ENSP00000221476,ENSP00000222553,ENSP00000226253,ENSP00000236959,ENSP00000253382,ENSP00000255381,ENSP00000258424,ENSP00000259037,ENSP00000262030,ENSP00000262878,ENSP00000264932,ENSP00000265462,ENSP00000265838,ENSP00000266544,ENSP00000273398,ENSP00000282541,ENSP00000297258,ENSP00000297283,ENSP00000297785,ENSP00000301149,ENSP00000301457,ENSP00000304229,ENSP00000308610,ENSP00000314649…	AASS,ACAT1,ACSF2,ACSL1,ACSS1,ACSS2,ADSSL1,ALDH1A1,ALDH5A1,ALDOA,ALDOC,ATIC,ATP5A1,ATP5B,ATP5J,ATP6V1A,CKM,COX5A,COX5B,DBI,FABP5,GPD1,GPD1L,GPD2,GPI,HINT1,HMGCL,HSD17B4,IDH1,IDH2,LDHA,LDHB,MCCC2,MFN1,MPI,MT-CO2,MYH4,MYH6,NAMPT,NAPRT,NDUFA5,NDUFA7,NDUFA8,NDUFA9,NDUFB5,NDUFB6,NDUFB7,NDUFS1,NDUFS2,NDUFS5,NDUFS8,NDUFV1,NUDT4,PDE3A,PFKM,PGAM2,PKM,PRDX5,PRDX6,SAMHD1,SDHA,SDHC,SUCLA2,SUCLG2,UQCC3,UQCR10
GO:0019752	carboxylic acid metabolic process	61	854	2.92e-28	ENSP00000216185,ENSP00000220764,ENSP00000221418,ENSP00000221476,ENSP00000226253,ENSP00000228740,ENSP00000231887,ENSP00000236959,ENSP00000241337,ENSP00000253382,ENSP00000264932,ENSP00000265395,ENSP00000265594,ENSP00000265838,ENSP00000266041,ENSP00000274813,ENSP00000285093,ENSP00000297283,ENSP00000299198,ENSP00000312618,ENSP00000314649,ENSP00000315013,ENSP00000316924,ENSP00000320171,ENSP00000331897…	AASS,ACAA2,ACAD9,ACADVL,ACAT1,ACSF2,ACSL1,ACSS1,ACSS2,ADSSL1,ALDH5A1,ALDH7A1,ALDOA,ALDOC,ATIC,BCO2,CKB,CKM,CKMT2,CRAT,DECR1,ECH1,EHHADH,EPHX2,EPRS,ETFDH,FABP3,GAMT,GOT1,GPI,GPT,GSTM2,HADHA,HIBADH,HMGCL,HSD17B4,IDH1,IDH2,ITIH4,LARS,LDHA,LDHB,LTA4H,MCCC1,MCCC2,ME3,MUT,PCCA,PCCB,PFKM,PGAM2,PKM,SARS2,SDHA,SDHC,SUCLA2,SUCLG1,SUCLG2,TST,TXN2,WARS
GO:0051186	cofactor metabolic process	45	467	4.06e-25	ENSP00000222553,ENSP00000226253,ENSP00000236959,ENSP00000241337,ENSP00000253382,ENSP00000265462,ENSP00000265594,ENSP00000265838,ENSP00000266544,ENSP00000270142,ENSP00000274813,ENSP00000282541,ENSP00000297283,ENSP00000301149,ENSP00000308610,ENSP00000311469,ENSP00000314649,ENSP00000316924,ENSP00000320171,ENSP00000325548,ENSP00000331897,ENSP00000342026,ENSP00000343657,ENSP00000345771,ENSP00000355741…	AASS,ACAT1,ACSF2,ACSL1,ACSS1,ACSS2,ADCK3,ALDH5A1,ALDOA,ALDOC,ATIC,CNDP2,DBI,GAMT,GOT1,GPD1,GPD1L,GPD2,GPI,GSTM1,GSTM2,HMGCL,HSD17B4,IDH1,IDH2,LDHA,LDHB,MAOB,MCCC1,MCCC2,MUT,NAMPT,NAPRT,NDUFA9,OPLAH,PCCA,PCCB,PFKM,PGAM2,PKM,PRDX5,PRDX6,SOD1,SUCLA2,SUCLG2
GO:0009167	purine ribonucleoside monophosphate metabolic process	35	230	4.07e-25	ENSP00000215565,ENSP00000226253,ENSP00000236959,ENSP00000255381,ENSP00000258424,ENSP00000259037,ENSP00000262030,ENSP00000264932,ENSP00000266544,ENSP00000273398,ENSP00000297283,ENSP00000301457,ENSP00000315774,ENSP00000317780,ENSP00000320171,ENSP00000322450,ENSP00000332887,ENSP00000333019,ENSP00000338352,ENSP00000345771,ENSP00000354876,ENSP00000356953,ENSP00000356972,ENSP00000362060,ENSP00000362873…	ADSSL1,ALDOA,ALDOC,ATIC,ATP5A1,ATP5B,ATP5J,ATP6V1A,COX5A,COX5B,GPI,LDHA,MT-CO2,MYH4,MYH6,NDUFA5,NDUFA7,NDUFA8,NDUFA9,NDUFB5,NDUFB6,NDUFB7,NDUFS1,NDUFS2,NDUFS5,NDUFS8,NDUFV1,NUDT4,PFKM,PGAM2,PKM,SDHA,SDHC,UQCC3,UQCR10
GO:0009144	purine nucleoside triphosphate metabolic process	34	228	3.71e-24	ENSP00000215565,ENSP00000226253,ENSP00000255381,ENSP00000258424,ENSP00000259037,ENSP00000262030,ENSP00000262878,ENSP00000264932,ENSP00000266544,ENSP00000273398,ENSP00000297283,ENSP00000301457,ENSP00000315774,ENSP00000317780,ENSP00000320171,ENSP00000322450,ENSP00000332887,ENSP00000345771,ENSP00000354876,ENSP00000356953,ENSP00000356972,ENSP00000362060,ENSP00000362873,ENSP00000369176,ENSP00000378669…	ALDOA,ALDOC,ATP5A1,ATP5B,ATP5J,ATP6V1A,COX5A,COX5B,GPI,LDHA,MFN1,MT-CO2,MYH4,MYH6,NDUFA5,NDUFA7,NDUFA8,NDUFA9,NDUFB5,NDUFB6,NDUFB7,NDUFS1,NDUFS2,NDUFS5,NDUFS8,NDUFV1,PFKM,PGAM2,PKM,SAMHD1,SDHA,SDHC,UQCC3,UQCR10
GO:0046034	ATP metabolic process	32	190	3.95e-24	ENSP00000215565,ENSP00000226253,ENSP00000255381,ENSP00000258424,ENSP00000259037,ENSP00000262030,ENSP00000264932,ENSP00000266544,ENSP00000273398,ENSP00000297283,ENSP00000301457,ENSP00000315774,ENSP00000317780,ENSP00000320171,ENSP00000322450,ENSP00000332887,ENSP00000345771,ENSP00000354876,ENSP00000356953,ENSP00000356972,ENSP00000362060,ENSP00000362873,ENSP00000369176,ENSP00000378669,ENSP00000381736…	ALDOA,ALDOC,ATP5A1,ATP5B,ATP5J,ATP6V1A,COX5A,COX5B,GPI,LDHA,MT-CO2,MYH4,MYH6,NDUFA5,NDUFA7,NDUFA8,NDUFA9,NDUFB5,NDUFB6,NDUFB7,NDUFS1,NDUFS2,NDUFS5,NDUFS8,NDUFV1,PFKM,PGAM2,PKM,SDHA,SDHC,UQCC3,UQCR10
GO:0009205	purine ribonucleoside triphosphate metabolic process	33	221	1.79e-23	ENSP00000215565,ENSP00000226253,ENSP00000255381,ENSP00000258424,ENSP00000259037,ENSP00000262030,ENSP00000264932,ENSP00000266544,ENSP00000273398,ENSP00000297283,ENSP00000301457,ENSP00000315774,ENSP00000317780,ENSP00000320171,ENSP00000322450,ENSP00000332887,ENSP00000345771,ENSP00000354876,ENSP00000356953,ENSP00000356972,ENSP00000362060,ENSP00000362873,ENSP00000369176,ENSP00000378669,ENSP00000381736…	ALDOA,ALDOC,ATP5A1,ATP5B,ATP5J,ATP6V1A,COX5A,COX5B,GPI,LDHA,MFN1,MT-CO2,MYH4,MYH6,NDUFA5,NDUFA7,NDUFA8,NDUFA9,NDUFB5,NDUFB6,NDUFB7,NDUFS1,NDUFS2,NDUFS5,NDUFS8,NDUFV1,PFKM,PGAM2,PKM,SDHA,SDHC,UQCC3,UQCR10
GO:0045333	cellular respiration	29	153	4.14e-23	ENSP00000215565,ENSP00000258424,ENSP00000259037,ENSP00000264932,ENSP00000266544,ENSP00000301149,ENSP00000301457,ENSP00000308610,ENSP00000314649,ENSP00000315774,ENSP00000317780,ENSP00000322450,ENSP00000331897,ENSP00000332887,ENSP00000354876,ENSP00000356953,ENSP00000356972,ENSP00000362060,ENSP00000362873,ENSP00000367923,ENSP00000369176,ENSP00000377446,ENSP00000390265,ENSP00000392709,ENSP00000417142…	ALDH5A1,COX5A,COX5B,ETFDH,GPD1,GPD2,IDH1,IDH2,ME3,MT-CO2,NDUFA5,NDUFA7,NDUFA8,NDUFA9,NDUFB5,NDUFB6,NDUFB7,NDUFS1,NDUFS2,NDUFS5,NDUFS8,NDUFV1,SDHA,SDHC,SUCLA2,SUCLG1,SUCLG2,UQCC3,UQCR10
GO:0015980	energy derivation by oxidation of organic compounds	32	217	1.24e-22	ENSP00000164139,ENSP00000215565,ENSP00000258424,ENSP00000259037,ENSP00000264932,ENSP00000266544,ENSP00000301149,ENSP00000301457,ENSP00000308610,ENSP00000314649,ENSP00000315774,ENSP00000317780,ENSP00000322450,ENSP00000331897,ENSP00000332887,ENSP00000345771,ENSP00000354876,ENSP00000356953,ENSP00000356972,ENSP00000362060,ENSP00000362873,ENSP00000367923,ENSP00000369176,ENSP00000377446,ENSP00000390265…	ACADVL,ALDH5A1,COX5A,COX5B,ETFDH,GPD1,GPD2,IDH1,IDH2,ME3,MT-CO2,NDUFA5,NDUFA7,NDUFA8,NDUFA9,NDUFB5,NDUFB6,NDUFB7,NDUFS1,NDUFS2,NDUFS5,NDUFS8,NDUFV1,PFKM,PYGM,SDHA,SDHC,SUCLA2,SUCLG1,SUCLG2,UQCC3,UQCR10
GO:1901135	carbohydrate derivative metabolic process	60	1083	1.57e-22	ENSP00000215565,ENSP00000226253,ENSP00000236959,ENSP00000253382,ENSP00000255381,ENSP00000258424,ENSP00000259037,ENSP00000262030,ENSP00000262878,ENSP00000264932,ENSP00000265838,ENSP00000266041,ENSP00000266544,ENSP00000273398,ENSP00000282541,ENSP00000297283,ENSP00000297785,ENSP00000301149,ENSP00000301457,ENSP00000304229,ENSP00000308610,ENSP00000314649,ENSP00000315774,ENSP00000316924,ENSP00000317780…	AASS,ACAT1,ACSF2,ACSL1,ACSS1,ACSS2,ADSSL1,ALDH1A1,ALDH5A1,ALDOA,ALDOC,ASAH1,ATIC,ATP5A1,ATP5B,ATP5J,ATP6V1A,COX5A,COX5B,DBI,GAMT,GPD1,GPD1L,GPD2,GPI,HINT1,HMGCL,HSD17B4,ITIH4,LDHA,MCCC2,MFN1,MPI,MT-CO2,MYH4,MYH6,NDUFA5,NDUFA7,NDUFA8,NDUFA9,NDUFB5,NDUFB6,NDUFB7,NDUFS1,NDUFS2,NDUFS5,NDUFS8,NDUFV1,NUDT4,PDE3A,PFKM,PGAM2,PKM,SAMHD1,SDHA,SDHC,SUCLA2,SUCLG2,UQCC3,UQCR10
GO:0006732	coenzyme metabolic process	35	297	5.7e-22	ENSP00000222553,ENSP00000226253,ENSP00000236959,ENSP00000253382,ENSP00000265462,ENSP00000265594,ENSP00000265838,ENSP00000266544,ENSP00000282541,ENSP00000297283,ENSP00000301149,ENSP00000308610,ENSP00000316924,ENSP00000320171,ENSP00000331897,ENSP00000343657,ENSP00000345771,ENSP00000355741,ENSP00000363614,ENSP00000365462,ENSP00000367923,ENSP00000377040,ENSP00000378669,ENSP00000379386,ENSP00000390265…	AASS,ACAT1,ACSF2,ACSL1,ACSS1,ACSS2,ADCK3,ALDOA,ALDOC,ATIC,DBI,GAMT,GPD1,GPD1L,GPD2,GPI,HMGCL,HSD17B4,IDH1,IDH2,LDHA,LDHB,MCCC1,MCCC2,NAMPT,NAPRT,NDUFA9,PCCA,PCCB,PFKM,PGAM2,PKM,PRDX5,SUCLA2,SUCLG2
GO:1901564	organonitrogen compound metabolic process	130	5281	1.07e-20	ENSP00000001008,ENSP00000005178,ENSP00000199706,ENSP00000215565,ENSP00000216185,ENSP00000221476,ENSP00000222553,ENSP00000223642,ENSP00000226253,ENSP00000228740,ENSP00000231887,ENSP00000236671,ENSP00000236959,ENSP00000241337,ENSP00000245539,ENSP00000250378,ENSP00000253382,ENSP00000254630,ENSP00000254950,ENSP00000255381,ENSP00000258424,ENSP00000259037,ENSP00000261893,ENSP00000262030,ENSP00000262878…	AASS,ACAT1,ACSF2,ACSL1,ACSS1,ACSS2,ADSSL1,ALDH5A1,ALDH7A1,ALDH9A1,ALDOA,ALDOC,APEH,ART3,ASAH1,ATIC,ATP5A1,ATP5B,ATP5J,ATP6V1A,C5,C6,C6orf211,CHDH,CKB,CKM,CKMT2,CMA1,CNDP2,COX5A,COX5B,CP,CPA3,CRAT,CTSB,CTSD,DBI,EHHADH,EPRS,F2,FABP5,FGF12,FKBP4,GAMT,GOT1,GPD1,GPD1L,GPD2,GPI,GPS1,GPT,GSTM1,GSTM2,HIBADH,HINT1,HMGCL,HSD17B4,IDH1,IDH2,ITIH4,KLHL31,LACTB,LARS,LDHA,LDHB,LTA4H,MAOB,MAPKAPK3,MCCC1,MCCC2,MF…
GO:0022904	respiratory electron transport chain	23	96	3.56e-20	ENSP00000215565,ENSP00000258424,ENSP00000259037,ENSP00000264932,ENSP00000266544,ENSP00000301149,ENSP00000301457,ENSP00000308610,ENSP00000314649,ENSP00000315774,ENSP00000317780,ENSP00000322450,ENSP00000332887,ENSP00000354876,ENSP00000356953,ENSP00000356972,ENSP00000362060,ENSP00000362873,ENSP00000369176,ENSP00000392709,ENSP00000417142,ENSP00000426638,ENSP00000432692	ALDH5A1,COX5A,COX5B,ETFDH,GPD1,GPD2,MT-CO2,NDUFA5,NDUFA7,NDUFA8,NDUFA9,NDUFB5,NDUFB6,NDUFB7,NDUFS1,NDUFS2,NDUFS5,NDUFS8,NDUFV1,SDHA,SDHC,UQCC3,UQCR10
GO:0006796	phosphate-containing compound metabolic process	77	2065	1.48e-19	ENSP00000005178,ENSP00000215565,ENSP00000221476,ENSP00000222553,ENSP00000226253,ENSP00000236959,ENSP00000253382,ENSP00000255381,ENSP00000258424,ENSP00000259037,ENSP00000262030,ENSP00000262878,ENSP00000264657,ENSP00000264932,ENSP00000265462,ENSP00000265838,ENSP00000266544,ENSP00000271620,ENSP00000273398,ENSP00000282541,ENSP00000297258,ENSP00000297283,ENSP00000297785,ENSP00000299198,ENSP00000301149…	AASS,ACAT1,ACSF2,ACSL1,ACSS1,ACSS2,ADCK3,ADSSL1,ALDH1A1,ALDH5A1,ALDOA,ALDOC,ATIC,ATP5A1,ATP5B,ATP5J,ATP6V1A,CKB,CKM,CKMT2,COX5A,COX5B,DBI,EPHX2,FABP5,FGF12,GPD1,GPD1L,GPD2,GPI,GPS1,HINT1,HMGCL,HSD17B4,IDH1,IDH2,LDHA,LDHB,MAPKAPK3,MCCC2,MFN1,MPI,MT-CO2,MYH4,MYH6,MYLK3,NAMPT,NAPRT,NDUFA5,NDUFA7,NDUFA8,NDUFA9,NDUFB5,NDUFB6,NDUFB7,NDUFS1,NDUFS2,NDUFS5,NDUFS8,NDUFV1,NUDT4,PDE3A,PDK4,PFKM,PGAM2,PKM,PRD…
GO:0022900	electron transport chain	26	169	1.13e-18	ENSP00000215565,ENSP00000258424,ENSP00000259037,ENSP00000261733,ENSP00000264932,ENSP00000266544,ENSP00000292907,ENSP00000301149,ENSP00000301457,ENSP00000308610,ENSP00000314649,ENSP00000315774,ENSP00000317780,ENSP00000322450,ENSP00000332887,ENSP00000354876,ENSP00000356953,ENSP00000356972,ENSP00000362060,ENSP00000362873,ENSP00000367309,ENSP00000369176,ENSP00000392709,ENSP00000417142,ENSP00000426638…	ALDH2,ALDH5A1,COX5A,COX5B,COX7A1,ETFDH,GPD1,GPD2,MAOB,MT-CO2,NDUFA5,NDUFA7,NDUFA8,NDUFA9,NDUFB5,NDUFB6,NDUFB7,NDUFS1,NDUFS2,NDUFS5,NDUFS8,NDUFV1,SDHA,SDHC,UQCC3,UQCR10
GO:0006119	oxidative phosphorylation	22	100	1.3e-18	ENSP00000215565,ENSP00000258424,ENSP00000259037,ENSP00000262030,ENSP00000264932,ENSP00000266544,ENSP00000301457,ENSP00000315774,ENSP00000317780,ENSP00000322450,ENSP00000332887,ENSP00000354876,ENSP00000356953,ENSP00000356972,ENSP00000362060,ENSP00000362873,ENSP00000369176,ENSP00000381736,ENSP00000389649,ENSP00000392709,ENSP00000417142,ENSP00000432692	ATP5A1,ATP5B,ATP5J,COX5A,COX5B,MT-CO2,NDUFA5,NDUFA7,NDUFA8,NDUFA9,NDUFB5,NDUFB6,NDUFB7,NDUFS1,NDUFS2,NDUFS5,NDUFS8,NDUFV1,SDHA,SDHC,UQCC3,UQCR10
GO:0032787	monocarboxylic acid metabolic process	36	477	8.78e-17	ENSP00000220764,ENSP00000221418,ENSP00000226253,ENSP00000228740,ENSP00000231887,ENSP00000241337,ENSP00000253382,ENSP00000265594,ENSP00000265838,ENSP00000285093,ENSP00000297283,ENSP00000312618,ENSP00000314649,ENSP00000315013,ENSP00000316924,ENSP00000320171,ENSP00000331897,ENSP00000343657,ENSP00000345771,ENSP00000350314,ENSP00000362817,ENSP00000365462,ENSP00000370023,ENSP00000378669,ENSP00000379386…	ACAA2,ACAD9,ACADVL,ACAT1,ACSF2,ACSL1,ACSS1,ACSS2,ALDH5A1,ALDOA,ALDOC,BCO2,CRAT,DECR1,ECH1,EHHADH,EPHX2,ETFDH,FABP3,GPI,GSTM2,HADHA,HSD17B4,IDH1,IDH2,LDHA,LDHB,LTA4H,MCCC1,MCCC2,ME3,PCCA,PCCB,PFKM,PGAM2,PKM
GO:0042775	mitochondrial ATP synthesis coupled electron transport	19	78	1.05e-16	ENSP00000215565,ENSP00000258424,ENSP00000259037,ENSP00000264932,ENSP00000266544,ENSP00000301457,ENSP00000315774,ENSP00000317780,ENSP00000322450,ENSP00000332887,ENSP00000354876,ENSP00000356953,ENSP00000356972,ENSP00000362060,ENSP00000362873,ENSP00000369176,ENSP00000392709,ENSP00000417142,ENSP00000432692	COX5A,COX5B,MT-CO2,NDUFA5,NDUFA7,NDUFA8,NDUFA9,NDUFB5,NDUFB6,NDUFB7,NDUFS1,NDUFS2,NDUFS5,NDUFS8,NDUFV1,SDHA,SDHC,UQCC3,UQCR10
GO:0043603	cellular amide metabolic process	42	732	9.86e-16	ENSP00000199706,ENSP00000228740,ENSP00000236959,ENSP00000241337,ENSP00000245539,ENSP00000250378,ENSP00000253382,ENSP00000254630,ENSP00000263629,ENSP00000265594,ENSP00000265838,ENSP00000270142,ENSP00000296046,ENSP00000296456,ENSP00000299427,ENSP00000301457,ENSP00000311469,ENSP00000313007,ENSP00000314649,ENSP00000316924,ENSP00000320324,ENSP00000325548,ENSP00000343657,ENSP00000347495,ENSP00000355890…	AASS,ACAT1,ACSF2,ACSL1,ACSS1,ACSS2,ALDH5A1,APEH,ASAH1,ATIC,CMA1,CNDP2,CPA3,DBI,EPRS,GSTM1,GSTM2,HMGCL,HSD17B4,IDH1,LARS,LTA4H,MCCC1,MCCC2,MRPL28,MRPS7,MTIF2,NACA,NDUFA7,NPEPPS,OPLAH,PABPC1,PCCA,PCCB,PTCD3,RPL6,SARS2,SOD1,SUCLA2,SUCLG2,TPP1,WARS
GO:0044282	small molecule catabolic process	31	388	5.69e-15	ENSP00000216185,ENSP00000220764,ENSP00000221418,ENSP00000226253,ENSP00000231887,ENSP00000261733,ENSP00000265395,ENSP00000265594,ENSP00000265838,ENSP00000285093,ENSP00000297283,ENSP00000297785,ENSP00000308610,ENSP00000314649,ENSP00000315013,ENSP00000320171,ENSP00000343657,ENSP00000345771,ENSP00000359539,ENSP00000363614,ENSP00000370023,ENSP00000377040,ENSP00000378408,ENSP00000378669,ENSP00000385828…	AASS,ACAA2,ACADVL,ACAT1,ALDH1A1,ALDH2,ALDH5A1,ALDH7A1,ALDOA,ALDOC,CRAT,DECR1,ECH1,EHHADH,ETFDH,GOT1,GPD2,GPI,GPT,HADHA,HIBADH,HMGCL,HSD17B4,MCCC1,MCCC2,PCCB,PFKM,PGAM2,PKM,TST,TXN2
GO:0008152	metabolic process	169	9569	1.02e-14	ENSP00000001008,ENSP00000005178,ENSP00000164139,ENSP00000199706,ENSP00000215565,ENSP00000216185,ENSP00000220764,ENSP00000221418,ENSP00000221476,ENSP00000222553,ENSP00000223642,ENSP00000226253,ENSP00000228740,ENSP00000231887,ENSP00000236671,ENSP00000236959,ENSP00000241337,ENSP00000245539,ENSP00000250378,ENSP00000253382,ENSP00000254630,ENSP00000254950,ENSP00000255381,ENSP00000258424,ENSP00000259037…	AASS,ACAA2,ACAD9,ACADVL,ACAT1,ACSF2,ACSL1,ACSS1,ACSS2,ACSS3,ADCK3,ADH1B,ADSSL1,ALDH1A1,ALDH2,ALDH5A1,ALDH7A1,ALDH9A1,ALDOA,ALDOC,APEH,ART3,ASAH1,ATIC,ATP5A1,ATP5B,ATP5J,ATP6V1A,BCO2,C5,C6,C6orf211,CHDH,CKB,CKM,CKMT2,CMA1,CNDP2,COX5A,COX5B,COX7A1,CP,CPA3,CRAT,CTSB,CTSD,DBI,DECR1,ECH1,EHHADH,EPHX2,EPRS,ETFDH,EZR,F2,FABP3,FABP5,FGF12,FHL2,FKBP4,FTH1,GAMT,GC,GOT1,GPD1,GPD1L,GPD2,GPI,GPS1,GPT,GSTM1,GS…
GO:0044237	cellular metabolic process	158	8797	2.52e-13	ENSP00000001008,ENSP00000005178,ENSP00000164139,ENSP00000199706,ENSP00000215565,ENSP00000216185,ENSP00000220764,ENSP00000221418,ENSP00000221476,ENSP00000222553,ENSP00000226253,ENSP00000228740,ENSP00000231887,ENSP00000236671,ENSP00000236959,ENSP00000241337,ENSP00000245539,ENSP00000250378,ENSP00000253382,ENSP00000254630,ENSP00000254950,ENSP00000255381,ENSP00000258424,ENSP00000259037,ENSP00000261733…	AASS,ACAA2,ACAD9,ACADVL,ACAT1,ACSF2,ACSL1,ACSS1,ACSS2,ACSS3,ADCK3,ADH1B,ADSSL1,ALDH1A1,ALDH2,ALDH5A1,ALDH7A1,ALDH9A1,ALDOA,ALDOC,APEH,ART3,ASAH1,ATIC,ATP5A1,ATP5B,ATP5J,ATP6V1A,BCO2,C6orf211,CHDH,CKB,CKM,CKMT2,CMA1,CNDP2,COX5A,COX5B,COX7A1,CP,CPA3,CRAT,CTSB,CTSD,DBI,DECR1,ECH1,EHHADH,EPHX2,EPRS,ETFDH,EZR,F2,FABP3,FABP5,FGF12,FHL2,FKBP4,GAMT,GOT1,GPD1,GPD1L,GPD2,GPI,GPS1,GPT,GSTM1,GSTM2,HADHA,HIBA…
GO:0009056	catabolic process	62	1859	5.68e-13	ENSP00000164139,ENSP00000216185,ENSP00000220764,ENSP00000221418,ENSP00000226253,ENSP00000228740,ENSP00000231887,ENSP00000236671,ENSP00000241337,ENSP00000254950,ENSP00000261733,ENSP00000262878,ENSP00000265395,ENSP00000265462,ENSP00000265594,ENSP00000265838,ENSP00000269298,ENSP00000282541,ENSP00000285093,ENSP00000297258,ENSP00000297283,ENSP00000297785,ENSP00000299427,ENSP00000301149,ENSP00000304229…	AASS,ACAA2,ACADVL,ACAT1,ACSL1,ALDH1A1,ALDH2,ALDH5A1,ALDH7A1,ALDOA,ALDOC,BCO2,CHDH,CRAT,CTSB,CTSD,DECR1,ECH1,EHHADH,EPHX2,ETFDH,FABP3,FABP5,GOT1,GPD1,GPD1L,GPD2,GPI,GPT,GSTM1,GSTM2,HADHA,HIBADH,HINT1,HMGCL,HSD17B4,LDHA,LTA4H,MAOB,MCCC1,MCCC2,MFN1,NPEPPS,NUDT4,OPTN,PABPC1,PCCB,PDE3A,PFKM,PGAM2,PKM,PRDX5,PRDX6,PTER,PYGM,RPL6,SAMHD1,SAT2,TPP1,TST,TXN2,VPS4A
GO:0071704	organic substance metabolic process	160	9135	1.45e-12	ENSP00000001008,ENSP00000005178,ENSP00000164139,ENSP00000199706,ENSP00000215565,ENSP00000216185,ENSP00000220764,ENSP00000221418,ENSP00000221476,ENSP00000222553,ENSP00000223642,ENSP00000226253,ENSP00000228740,ENSP00000231887,ENSP00000236671,ENSP00000236959,ENSP00000241337,ENSP00000245539,ENSP00000250378,ENSP00000253382,ENSP00000254630,ENSP00000254950,ENSP00000255381,ENSP00000258424,ENSP00000259037…	AASS,ACAA2,ACAD9,ACADVL,ACAT1,ACSF2,ACSL1,ACSS1,ACSS2,ACSS3,ADCK3,ADH1B,ADSSL1,ALDH1A1,ALDH2,ALDH5A1,ALDH7A1,ALDH9A1,ALDOA,ALDOC,APEH,ART3,ASAH1,ATIC,ATP5A1,ATP5B,ATP5J,ATP6V1A,BCO2,C5,C6,C6orf211,CHDH,CKB,CKM,CKMT2,CMA1,CNDP2,COX5A,COX5B,CP,CPA3,CRAT,CTSB,CTSD,DBI,DECR1,ECH1,EHHADH,EPHX2,EPRS,ETFDH,EZR,F2,FABP3,FABP5,FGF12,FHL2,FKBP4,GAMT,GC,GOT1,GPD1,GPD1L,GPD2,GPI,GPS1,GPT,GSTM1,GSTM2,HADHA,HI…
GO:0044248	cellular catabolic process	57	1646	1.97e-12	ENSP00000164139,ENSP00000216185,ENSP00000220764,ENSP00000221418,ENSP00000226253,ENSP00000228740,ENSP00000231887,ENSP00000236671,ENSP00000241337,ENSP00000254950,ENSP00000261733,ENSP00000262878,ENSP00000265395,ENSP00000265462,ENSP00000265594,ENSP00000265838,ENSP00000285093,ENSP00000297258,ENSP00000297283,ENSP00000299427,ENSP00000304229,ENSP00000308610,ENSP00000311469,ENSP00000313007,ENSP00000314649…	AASS,ACAA2,ACADVL,ACAT1,ACSL1,ALDH2,ALDH5A1,ALDH7A1,ALDOA,ALDOC,BCO2,CHDH,CRAT,CTSB,CTSD,DECR1,ECH1,EHHADH,EPHX2,ETFDH,FABP3,FABP5,GOT1,GPD2,GPI,GPT,GSTM1,GSTM2,HADHA,HIBADH,HINT1,HMGCL,HSD17B4,LDHA,LTA4H,MAOB,MCCC1,MCCC2,MFN1,NPEPPS,NUDT4,OPTN,PABPC1,PCCB,PDE3A,PFKM,PGAM2,PKM,PRDX5,PRDX6,PYGM,RPL6,SAMHD1,TPP1,TST,TXN2,VPS4A
GO:0006733	oxidoreduction coenzyme metabolic process	18	124	2.1e-12	ENSP00000222553,ENSP00000226253,ENSP00000265462,ENSP00000266544,ENSP00000282541,ENSP00000297283,ENSP00000301149,ENSP00000308610,ENSP00000320171,ENSP00000331897,ENSP00000345771,ENSP00000355741,ENSP00000378669,ENSP00000379386,ENSP00000390265,ENSP00000401508,ENSP00000405573,ENSP00000445175	ADCK3,ALDOA,ALDOC,GPD1,GPD1L,GPD2,GPI,IDH1,IDH2,LDHA,LDHB,NAMPT,NAPRT,NDUFA9,PFKM,PGAM2,PKM,PRDX5
GO:0016999	antibiotic metabolic process	18	124	2.1e-12	ENSP00000253382,ENSP00000261733,ENSP00000264932,ENSP00000265462,ENSP00000270142,ENSP00000297785,ENSP00000306606,ENSP00000314649,ENSP00000316924,ENSP00000331897,ENSP00000342026,ENSP00000356953,ENSP00000367309,ENSP00000367923,ENSP00000377446,ENSP00000390265,ENSP00000419325,ENSP00000440246	ACSS1,ACSS2,ADH1B,ALDH1A1,ALDH2,ALDH5A1,IDH1,IDH2,MAOB,ME3,PRDX5,PRDX6,SDHA,SDHC,SOD1,SUCLA2,SUCLG1,SUCLG2
GO:0051188	cofactor biosynthetic process	22	218	2.44e-12	ENSP00000222553,ENSP00000226253,ENSP00000236959,ENSP00000253382,ENSP00000265838,ENSP00000266544,ENSP00000270142,ENSP00000297283,ENSP00000316924,ENSP00000320171,ENSP00000325548,ENSP00000331897,ENSP00000345771,ENSP00000355741,ENSP00000367309,ENSP00000367923,ENSP00000378669,ENSP00000401508,ENSP00000405573,ENSP00000422607,ENSP00000445175,ENSP00000480476	ACAT1,ACSL1,ACSS1,ACSS2,ADCK3,ALDOA,ALDOC,ATIC,CNDP2,GPI,IDH2,LDHA,MAOB,NAMPT,NAPRT,NDUFA9,OPLAH,PFKM,PGAM2,PKM,SOD1,SUCLA2
GO:0006953	acute-phase response	13	45	3.85e-12	ENSP00000255030,ENSP00000259396,ENSP00000264657,ENSP00000266041,ENSP00000278222,ENSP00000308541,ENSP00000321853,ENSP00000348170,ENSP00000376793,ENSP00000384906,ENSP00000394936,ENSP00000416066,ENSP00000436126	CRP,F2,GIG25,HP,ITIH4,ORM1,ORM2,SAA1,SAA2,SAA4,SERPINA1,SERPINF2,STAT3
GO:0006790	sulfur compound metabolic process	26	343	5.32e-12	ENSP00000216185,ENSP00000241337,ENSP00000253382,ENSP00000265594,ENSP00000265838,ENSP00000270142,ENSP00000274813,ENSP00000311469,ENSP00000314649,ENSP00000316924,ENSP00000325548,ENSP00000343657,ENSP00000363614,ENSP00000365462,ENSP00000367923,ENSP00000377040,ENSP00000385828,ENSP00000390265,ENSP00000401831,ENSP00000403536,ENSP00000419027,ENSP00000419325,ENSP00000420914,ENSP00000422607,ENSP00000439012…	AASS,ACAT1,ACSF2,ACSL1,ACSS1,ACSS2,ALDH5A1,CNDP2,DBI,GAMT,GSTM1,GSTM2,HMGCL,HSD17B4,IDH1,MCCC1,MCCC2,MUT,OPLAH,PCCA,PCCB,SOD1,SUCLA2,SUCLG2,TST,TXN2
GO:1901575	organic substance catabolic process	55	1609	9.43e-12	ENSP00000164139,ENSP00000216185,ENSP00000220764,ENSP00000221418,ENSP00000226253,ENSP00000228740,ENSP00000231887,ENSP00000236671,ENSP00000254950,ENSP00000261733,ENSP00000262878,ENSP00000265395,ENSP00000265594,ENSP00000265838,ENSP00000269298,ENSP00000282541,ENSP00000285093,ENSP00000297258,ENSP00000297283,ENSP00000297785,ENSP00000299427,ENSP00000301149,ENSP00000304229,ENSP00000308610,ENSP00000313007…	AASS,ACAA2,ACADVL,ACAT1,ALDH1A1,ALDH2,ALDH5A1,ALDH7A1,ALDOA,ALDOC,BCO2,CHDH,CRAT,CTSB,CTSD,DECR1,ECH1,EHHADH,EPHX2,ETFDH,FABP3,FABP5,GOT1,GPD1,GPD1L,GPD2,GPI,GPT,HADHA,HIBADH,HINT1,HMGCL,HSD17B4,LDHA,LTA4H,MAOB,MCCC1,MCCC2,NPEPPS,NUDT4,PABPC1,PCCB,PDE3A,PFKM,PGAM2,PKM,PRDX6,PYGM,RPL6,SAMHD1,SAT2,TPP1,TST,TXN2,VPS4A
GO:0033108	mitochondrial respiratory chain complex assembly	16	98	1.02e-11	ENSP00000215565,ENSP00000259037,ENSP00000266544,ENSP00000301457,ENSP00000312618,ENSP00000315774,ENSP00000322450,ENSP00000332887,ENSP00000356972,ENSP00000362060,ENSP00000362873,ENSP00000369176,ENSP00000392709,ENSP00000417142,ENSP00000423673,ENSP00000432692	ACAD9,NDUFA13,NDUFA5,NDUFA7,NDUFA8,NDUFA9,NDUFB5,NDUFB6,NDUFB7,NDUFS1,NDUFS2,NDUFS5,NDUFS8,NDUFV1,UQCC3,UQCR10
GO:0046395	carboxylic acid catabolic process	22	237	1.06e-11	ENSP00000216185,ENSP00000220764,ENSP00000221418,ENSP00000231887,ENSP00000265395,ENSP00000265594,ENSP00000265838,ENSP00000285093,ENSP00000314649,ENSP00000315013,ENSP00000343657,ENSP00000359539,ENSP00000363614,ENSP00000370023,ENSP00000377040,ENSP00000378408,ENSP00000385828,ENSP00000387123,ENSP00000419027,ENSP00000420914,ENSP00000426638,ENSP00000438689	AASS,ACAA2,ACADVL,ACAT1,ALDH5A1,ALDH7A1,CRAT,DECR1,ECH1,EHHADH,ETFDH,GOT1,GPT,HADHA,HIBADH,HMGCL,HSD17B4,MCCC1,MCCC2,PCCB,TST,TXN2
GO:0032981	mitochondrial respiratory chain complex I assembly	14	65	1.17e-11	ENSP00000215565,ENSP00000259037,ENSP00000266544,ENSP00000301457,ENSP00000312618,ENSP00000315774,ENSP00000322450,ENSP00000356972,ENSP00000362060,ENSP00000362873,ENSP00000369176,ENSP00000392709,ENSP00000417142,ENSP00000423673	ACAD9,NDUFA13,NDUFA5,NDUFA7,NDUFA8,NDUFA9,NDUFB5,NDUFB6,NDUFB7,NDUFS1,NDUFS2,NDUFS5,NDUFS8,NDUFV1
GO:1901566	organonitrogen compound biosynthetic process	50	1370	1.34e-11	ENSP00000199706,ENSP00000221476,ENSP00000222553,ENSP00000226253,ENSP00000236959,ENSP00000241337,ENSP00000245539,ENSP00000250378,ENSP00000253382,ENSP00000254630,ENSP00000258424,ENSP00000262030,ENSP00000263629,ENSP00000265838,ENSP00000296456,ENSP00000297258,ENSP00000297283,ENSP00000301457,ENSP00000311469,ENSP00000313007,ENSP00000316924,ENSP00000318318,ENSP00000319851,ENSP00000320171,ENSP00000325548…	AASS,ACAT1,ACSL1,ACSS1,ACSS2,ADSSL1,ALDH7A1,ALDH9A1,ALDOA,ALDOC,APEH,ATIC,ATP5A1,ATP5B,ATP5J,CHDH,CKM,CMA1,CNDP2,COX5B,EPRS,FABP5,GAMT,GOT1,GPI,GPT,GSTM1,GSTM2,IDH2,LARS,LDHA,MPI,MRPL28,MRPS7,MTIF2,NACA,NAMPT,NAPRT,NDUFA7,OPLAH,PABPC1,PFKM,PGAM2,PKM,PTCD3,RPL6,SARS2,SUCLA2,UQCC3,WARS
GO:0046496	nicotinamide nucleotide metabolic process	16	107	3.09e-11	ENSP00000222553,ENSP00000226253,ENSP00000265462,ENSP00000282541,ENSP00000297283,ENSP00000301149,ENSP00000308610,ENSP00000320171,ENSP00000331897,ENSP00000345771,ENSP00000378669,ENSP00000379386,ENSP00000390265,ENSP00000401508,ENSP00000405573,ENSP00000445175	ALDOA,ALDOC,GPD1,GPD1L,GPD2,GPI,IDH1,IDH2,LDHA,LDHB,NAMPT,NAPRT,PFKM,PGAM2,PKM,PRDX5
GO:0002526	acute inflammatory response	14	73	4.33e-11	ENSP00000255030,ENSP00000259396,ENSP00000264657,ENSP00000266041,ENSP00000278222,ENSP00000308541,ENSP00000321853,ENSP00000348170,ENSP00000376793,ENSP00000378288,ENSP00000384906,ENSP00000394936,ENSP00000416066,ENSP00000436126	CRP,F2,GIG25,HP,ITIH4,MYLK3,ORM1,ORM2,SAA1,SAA2,SAA4,SERPINA1,SERPINF2,STAT3
GO:0006120	mitochondrial electron transport, NADH to ubiquinone	12	44	5.22e-11	ENSP00000215565,ENSP00000259037,ENSP00000266544,ENSP00000301457,ENSP00000315774,ENSP00000322450,ENSP00000356972,ENSP00000362060,ENSP00000362873,ENSP00000369176,ENSP00000392709,ENSP00000417142	NDUFA5,NDUFA7,NDUFA8,NDUFA9,NDUFB5,NDUFB6,NDUFB7,NDUFS1,NDUFS2,NDUFS5,NDUFS8,NDUFV1
GO:0044283	small molecule biosynthetic process	31	569	6.23e-11	ENSP00000226253,ENSP00000228740,ENSP00000236959,ENSP00000253382,ENSP00000262878,ENSP00000265838,ENSP00000266544,ENSP00000285093,ENSP00000297283,ENSP00000301149,ENSP00000304229,ENSP00000308610,ENSP00000316924,ENSP00000320171,ENSP00000338352,ENSP00000345771,ENSP00000351957,ENSP00000355741,ENSP00000359539,ENSP00000363614,ENSP00000367923,ENSP00000377040,ENSP00000378408,ENSP00000378669,ENSP00000380837…	AASS,ACAA2,ACAT1,ACSS1,ACSS2,ACSS3,ADCK3,ALDOA,ALDOC,ATIC,EPHX2,GAMT,GOT1,GPD1,GPD2,GPI,GPT,HINT1,HMGCL,HSD17B4,LDHA,LSS,LTA4H,NDUFA9,NUDT4,PDE3A,PFKM,PGAM2,PKM,SAMHD1,SUCLA2
GO:0019674	NAD metabolic process	13	66	2.01e-10	ENSP00000222553,ENSP00000226253,ENSP00000282541,ENSP00000297283,ENSP00000301149,ENSP00000308610,ENSP00000320171,ENSP00000345771,ENSP00000378669,ENSP00000379386,ENSP00000401508,ENSP00000405573,ENSP00000445175	ALDOA,ALDOC,GPD1,GPD1L,GPD2,GPI,LDHA,LDHB,NAMPT,NAPRT,PFKM,PGAM2,PKM
GO:0009152	purine ribonucleotide biosynthetic process	18	189	1e-09	ENSP00000226253,ENSP00000236959,ENSP00000253382,ENSP00000258424,ENSP00000262030,ENSP00000265838,ENSP00000297283,ENSP00000316924,ENSP00000320171,ENSP00000333019,ENSP00000345771,ENSP00000378669,ENSP00000381736,ENSP00000389649,ENSP00000405573,ENSP00000422607,ENSP00000432692,ENSP00000445175	ACAT1,ACSL1,ACSS1,ACSS2,ADSSL1,ALDOA,ALDOC,ATIC,ATP5A1,ATP5B,ATP5J,COX5B,GPI,LDHA,PFKM,PGAM2,PKM,UQCC3
GO:0006520	cellular amino acid metabolic process	22	308	1.08e-09	ENSP00000216185,ENSP00000221476,ENSP00000265395,ENSP00000265594,ENSP00000265838,ENSP00000274813,ENSP00000299198,ENSP00000314649,ENSP00000333019,ENSP00000343657,ENSP00000347495,ENSP00000355890,ENSP00000359539,ENSP00000363614,ENSP00000377040,ENSP00000377954,ENSP00000378408,ENSP00000385828,ENSP00000387123,ENSP00000403536,ENSP00000404203,ENSP00000472847	AASS,ACAT1,ADSSL1,ALDH5A1,ALDH7A1,CKB,CKM,CKMT2,EPRS,GAMT,GOT1,GPT,HIBADH,HMGCL,LARS,MCCC1,MCCC2,MUT,SARS2,TST,TXN2,WARS
GO:0009108	coenzyme biosynthetic process	17	167	1.34e-09	ENSP00000222553,ENSP00000226253,ENSP00000236959,ENSP00000253382,ENSP00000265838,ENSP00000266544,ENSP00000297283,ENSP00000316924,ENSP00000320171,ENSP00000331897,ENSP00000345771,ENSP00000355741,ENSP00000378669,ENSP00000401508,ENSP00000405573,ENSP00000422607,ENSP00000445175	ACAT1,ACSL1,ACSS1,ACSS2,ADCK3,ALDOA,ALDOC,ATIC,GPI,IDH2,LDHA,NAMPT,NAPRT,NDUFA9,PFKM,PGAM2,PKM
GO:0009168	purine ribonucleoside monophosphate biosynthetic process	14	98	1.34e-09	ENSP00000226253,ENSP00000236959,ENSP00000258424,ENSP00000262030,ENSP00000297283,ENSP00000320171,ENSP00000333019,ENSP00000345771,ENSP00000378669,ENSP00000381736,ENSP00000389649,ENSP00000405573,ENSP00000432692,ENSP00000445175	ADSSL1,ALDOA,ALDOC,ATIC,ATP5A1,ATP5B,ATP5J,COX5B,GPI,LDHA,PFKM,PGAM2,PKM,UQCC3
GO:0034641	cellular nitrogen compound metabolic process	104	5126	1.84e-09	ENSP00000199706,ENSP00000215565,ENSP00000222553,ENSP00000226253,ENSP00000228740,ENSP00000236959,ENSP00000241337,ENSP00000245539,ENSP00000250378,ENSP00000253382,ENSP00000254630,ENSP00000255381,ENSP00000258424,ENSP00000259037,ENSP00000262030,ENSP00000262878,ENSP00000263629,ENSP00000264657,ENSP00000264932,ENSP00000265462,ENSP00000265594,ENSP00000265838,ENSP00000266544,ENSP00000269298,ENSP00000270142…	AASS,ACAT1,ACSF2,ACSL1,ACSS1,ACSS2,ADSSL1,ALDH5A1,ALDH7A1,ALDH9A1,ALDOA,ALDOC,APEH,ASAH1,ATIC,ATP5A1,ATP5B,ATP5J,ATP6V1A,CHDH,CMA1,CNDP2,COX5A,COX5B,CPA3,CRAT,DBI,EPRS,FHL2,GAMT,GPD1,GPD1L,GPD2,GPI,GPS1,GSTM1,GSTM2,HINT1,HMGCL,HSD17B4,IDH1,IDH2,KLHL31,LARS,LDHA,LDHB,LTA4H,MCCC1,MCCC2,MFN1,MPI,MRPL28,MRPS7,MT-CO2,MTIF2,MYH4,MYH6,NACA,NAMPT,NAPRT,NDUFA5,NDUFA7,NDUFA8,NDUFA9,NDUFB5,NDUFB6,NDUFB7,NDU…
GO:0007005	mitochondrion organization	25	424	1.99e-09	ENSP00000215565,ENSP00000259037,ENSP00000262030,ENSP00000264657,ENSP00000266544,ENSP00000281456,ENSP00000285093,ENSP00000301457,ENSP00000312618,ENSP00000315774,ENSP00000322450,ENSP00000332887,ENSP00000356972,ENSP00000362060,ENSP00000362873,ENSP00000363614,ENSP00000369176,ENSP00000381736,ENSP00000389649,ENSP00000392709,ENSP00000417142,ENSP00000419665,ENSP00000420617,ENSP00000423673,ENSP00000432692	ACAA2,ACAD9,ATP5A1,ATP5B,ATP5J,HMGCL,MFN1,NDUFA13,NDUFA5,NDUFA7,NDUFA8,NDUFA9,NDUFB5,NDUFB6,NDUFB7,NDUFS1,NDUFS2,NDUFS5,NDUFS8,NDUFV1,SLC25A4,SSBP1,STAT3,UQCC3,UQCR10
GO:0009165	nucleotide biosynthetic process	21	291	2.37e-09	ENSP00000222553,ENSP00000226253,ENSP00000236959,ENSP00000253382,ENSP00000258424,ENSP00000262030,ENSP00000265838,ENSP00000297283,ENSP00000316924,ENSP00000320171,ENSP00000331897,ENSP00000333019,ENSP00000345771,ENSP00000378669,ENSP00000381736,ENSP00000389649,ENSP00000401508,ENSP00000405573,ENSP00000422607,ENSP00000432692,ENSP00000445175	ACAT1,ACSL1,ACSS1,ACSS2,ADSSL1,ALDOA,ALDOC,ATIC,ATP5A1,ATP5B,ATP5J,COX5B,GPI,IDH2,LDHA,NAMPT,NAPRT,PFKM,PGAM2,PKM,UQCC3
GO:0006631	fatty acid metabolic process	21	294	2.72e-09	ENSP00000220764,ENSP00000221418,ENSP00000228740,ENSP00000231887,ENSP00000241337,ENSP00000253382,ENSP00000265838,ENSP00000285093,ENSP00000312618,ENSP00000314649,ENSP00000315013,ENSP00000316924,ENSP00000362817,ENSP00000370023,ENSP00000401831,ENSP00000419027,ENSP00000420914,ENSP00000422607,ENSP00000426638,ENSP00000430269,ENSP00000438689	ACAA2,ACAD9,ACADVL,ACAT1,ACSF2,ACSL1,ACSS1,ACSS2,ALDH5A1,CRAT,DECR1,ECH1,EHHADH,EPHX2,ETFDH,FABP3,GSTM2,HADHA,HSD17B4,LTA4H,PCCB
GO:0009060	aerobic respiration	12	71	5.32e-09	ENSP00000258424,ENSP00000264932,ENSP00000317780,ENSP00000331897,ENSP00000332887,ENSP00000354876,ENSP00000356953,ENSP00000367923,ENSP00000377446,ENSP00000390265,ENSP00000419325,ENSP00000440246	COX5A,COX5B,IDH1,IDH2,ME3,MT-CO2,SDHA,SDHC,SUCLA2,SUCLG1,SUCLG2,UQCR10
GO:0044238	primary metabolic process	147	8808	7.56e-09	ENSP00000001008,ENSP00000005178,ENSP00000164139,ENSP00000199706,ENSP00000215565,ENSP00000216185,ENSP00000220764,ENSP00000221418,ENSP00000221476,ENSP00000222553,ENSP00000223642,ENSP00000226253,ENSP00000228740,ENSP00000231887,ENSP00000236671,ENSP00000236959,ENSP00000241337,ENSP00000245539,ENSP00000250378,ENSP00000253382,ENSP00000254630,ENSP00000254950,ENSP00000255381,ENSP00000258424,ENSP00000259037…	AASS,ACAA2,ACAD9,ACADVL,ACAT1,ACSF2,ACSL1,ACSS1,ACSS2,ADSSL1,ALDH1A1,ALDH2,ALDH5A1,ALDH7A1,ALDOA,ALDOC,APEH,ART3,ASAH1,ATIC,ATP5A1,ATP5B,ATP5J,ATP6V1A,BCO2,C5,C6,C6orf211,CKB,CKM,CKMT2,CMA1,CNDP2,COX5A,COX5B,CP,CPA3,CRAT,CTSB,CTSD,DBI,DECR1,ECH1,EHHADH,EPHX2,EPRS,ETFDH,F2,FABP3,FABP5,FGF12,FHL2,FKBP4,GAMT,GC,GOT1,GPD1,GPD1L,GPD2,GPI,GPS1,GPT,GSTM2,HADHA,HIBADH,HINT1,HMGCL,HSD17B4,IDH1,IDH2,KLHL31…
GO:0006754	ATP biosynthetic process	12	75	9.14e-09	ENSP00000226253,ENSP00000258424,ENSP00000262030,ENSP00000297283,ENSP00000320171,ENSP00000345771,ENSP00000378669,ENSP00000381736,ENSP00000389649,ENSP00000405573,ENSP00000432692,ENSP00000445175	ALDOA,ALDOC,ATP5A1,ATP5B,ATP5J,COX5B,GPI,LDHA,PFKM,PGAM2,PKM,UQCC3
GO:0046434	organophosphate catabolic process	15	152	2.43e-08	ENSP00000226253,ENSP00000262878,ENSP00000265838,ENSP00000282541,ENSP00000297283,ENSP00000301149,ENSP00000304229,ENSP00000320171,ENSP00000338352,ENSP00000342026,ENSP00000345771,ENSP00000351957,ENSP00000378669,ENSP00000405573,ENSP00000445175	ACAT1,ALDOA,ALDOC,GPD1,GPD1L,GPI,HINT1,LDHA,NUDT4,PDE3A,PFKM,PGAM2,PKM,PRDX6,SAMHD1
GO:0006734	NADH metabolic process	9	34	3.42e-08	ENSP00000226253,ENSP00000282541,ENSP00000297283,ENSP00000301149,ENSP00000308610,ENSP00000320171,ENSP00000345771,ENSP00000378669,ENSP00000405573	ALDOA,ALDOC,GPD1,GPD1L,GPD2,GPI,PFKM,PGAM2,PKM
GO:0006575	cellular modified amino acid metabolic process	16	185	3.72e-08	ENSP00000221476,ENSP00000236959,ENSP00000241337,ENSP00000270142,ENSP00000299198,ENSP00000311469,ENSP00000314649,ENSP00000315013,ENSP00000319851,ENSP00000325548,ENSP00000346827,ENSP00000387123,ENSP00000390265,ENSP00000403536,ENSP00000404203,ENSP00000480476	ALDH5A1,ALDH7A1,ALDH9A1,ATIC,CHDH,CKB,CKM,CKMT2,CNDP2,CRAT,GAMT,GSTM1,GSTM2,IDH1,OPLAH,SOD1
GO:0006518	peptide metabolic process	25	497	3.8e-08	ENSP00000199706,ENSP00000228740,ENSP00000241337,ENSP00000245539,ENSP00000250378,ENSP00000254630,ENSP00000263629,ENSP00000270142,ENSP00000296046,ENSP00000296456,ENSP00000299427,ENSP00000301457,ENSP00000311469,ENSP00000313007,ENSP00000314649,ENSP00000320324,ENSP00000325548,ENSP00000347495,ENSP00000355890,ENSP00000377954,ENSP00000390265,ENSP00000403172,ENSP00000448035,ENSP00000472847,ENSP00000480476	ALDH5A1,APEH,CMA1,CNDP2,CPA3,EPRS,GSTM1,GSTM2,IDH1,LARS,LTA4H,MRPL28,MRPS7,MTIF2,NACA,NDUFA7,NPEPPS,OPLAH,PABPC1,PTCD3,RPL6,SARS2,SOD1,TPP1,WARS
GO:0044242	cellular lipid catabolic process	15	167	7.44e-08	ENSP00000220764,ENSP00000221418,ENSP00000231887,ENSP00000265838,ENSP00000285093,ENSP00000297258,ENSP00000315013,ENSP00000342026,ENSP00000350314,ENSP00000362817,ENSP00000370023,ENSP00000419027,ENSP00000420914,ENSP00000426638,ENSP00000438689	ACAA2,ACADVL,ACAT1,BCO2,CRAT,DECR1,ECH1,EHHADH,ETFDH,FABP3,FABP5,HADHA,HSD17B4,PCCB,PRDX6
GO:0006635	fatty acid beta-oxidation	10	56	1.03e-07	ENSP00000220764,ENSP00000221418,ENSP00000231887,ENSP00000265838,ENSP00000285093,ENSP00000315013,ENSP00000370023,ENSP00000420914,ENSP00000426638,ENSP00000438689	ACAA2,ACADVL,ACAT1,CRAT,DECR1,ECH1,EHHADH,ETFDH,HADHA,HSD17B4
GO:0009166	nucleotide catabolic process	12	101	1.74e-07	ENSP00000226253,ENSP00000262878,ENSP00000265838,ENSP00000297283,ENSP00000304229,ENSP00000320171,ENSP00000338352,ENSP00000345771,ENSP00000351957,ENSP00000378669,ENSP00000405573,ENSP00000445175	ACAT1,ALDOA,ALDOC,GPI,HINT1,LDHA,NUDT4,PDE3A,PFKM,PGAM2,PKM,SAMHD1
GO:1901605	alpha-amino acid metabolic process	16	209	1.77e-07	ENSP00000221476,ENSP00000265395,ENSP00000265594,ENSP00000265838,ENSP00000274813,ENSP00000299198,ENSP00000314649,ENSP00000333019,ENSP00000343657,ENSP00000359539,ENSP00000363614,ENSP00000377040,ENSP00000378408,ENSP00000387123,ENSP00000403536,ENSP00000404203	AASS,ACAT1,ADSSL1,ALDH5A1,ALDH7A1,CKB,CKM,CKMT2,GAMT,GOT1,GPT,HIBADH,HMGCL,MCCC1,MCCC2,MUT
GO:0019318	hexose metabolic process	14	154	2.12e-07	ENSP00000005178,ENSP00000226253,ENSP00000297258,ENSP00000297283,ENSP00000297785,ENSP00000301149,ENSP00000308610,ENSP00000314649,ENSP00000318318,ENSP00000320171,ENSP00000345771,ENSP00000359539,ENSP00000378669,ENSP00000405573	ALDH1A1,ALDH5A1,ALDOA,ALDOC,FABP5,GOT1,GPD1,GPD2,GPI,MPI,PDK4,PFKM,PGAM2,PKM
GO:0072329	monocarboxylic acid catabolic process	12	106	2.74e-07	ENSP00000220764,ENSP00000221418,ENSP00000231887,ENSP00000265838,ENSP00000285093,ENSP00000314649,ENSP00000315013,ENSP00000370023,ENSP00000419027,ENSP00000420914,ENSP00000426638,ENSP00000438689	ACAA2,ACADVL,ACAT1,ALDH5A1,CRAT,DECR1,ECH1,EHHADH,ETFDH,HADHA,HSD17B4,PCCB
GO:0016310	phosphorylation	39	1236	2.86e-07	ENSP00000005178,ENSP00000215565,ENSP00000221476,ENSP00000226253,ENSP00000258424,ENSP00000259037,ENSP00000262030,ENSP00000264657,ENSP00000264932,ENSP00000266544,ENSP00000297283,ENSP00000299198,ENSP00000301457,ENSP00000315774,ENSP00000317780,ENSP00000320171,ENSP00000322450,ENSP00000332887,ENSP00000345771,ENSP00000354876,ENSP00000355741,ENSP00000356953,ENSP00000356972,ENSP00000362060,ENSP00000362873…	ADCK3,ALDOA,ALDOC,ATP5A1,ATP5B,ATP5J,CKB,CKM,CKMT2,COX5A,COX5B,FGF12,GPI,GPS1,LDHA,MAPKAPK3,MT-CO2,MYLK3,NDUFA5,NDUFA7,NDUFA8,NDUFA9,NDUFB5,NDUFB6,NDUFB7,NDUFS1,NDUFS2,NDUFS5,NDUFS8,NDUFV1,PDK4,PFKM,PGAM2,PKM,SDHA,SDHC,STAT3,UQCC3,UQCR10
GO:0009062	fatty acid catabolic process	11	84	2.87e-07	ENSP00000220764,ENSP00000221418,ENSP00000231887,ENSP00000265838,ENSP00000285093,ENSP00000315013,ENSP00000370023,ENSP00000419027,ENSP00000420914,ENSP00000426638,ENSP00000438689	ACAA2,ACADVL,ACAT1,CRAT,DECR1,ECH1,EHHADH,ETFDH,HADHA,HSD17B4,PCCB
GO:0006807	nitrogen compound metabolic process	137	8349	3.21e-07	ENSP00000001008,ENSP00000005178,ENSP00000199706,ENSP00000215565,ENSP00000216185,ENSP00000221476,ENSP00000222553,ENSP00000223642,ENSP00000226253,ENSP00000228740,ENSP00000231887,ENSP00000236671,ENSP00000236959,ENSP00000241337,ENSP00000245539,ENSP00000250378,ENSP00000253382,ENSP00000254630,ENSP00000254950,ENSP00000255381,ENSP00000258424,ENSP00000259037,ENSP00000261893,ENSP00000262030,ENSP00000262878…	AASS,ACAT1,ACSF2,ACSL1,ACSS1,ACSS2,ADSSL1,ALDH5A1,ALDH7A1,ALDH9A1,ALDOA,ALDOC,APEH,ART3,ASAH1,ATIC,ATP5A1,ATP5B,ATP5J,ATP6V1A,C5,C6,C6orf211,CHDH,CKB,CKM,CKMT2,CMA1,CNDP2,COX5A,COX5B,CP,CPA3,CRAT,CTSB,CTSD,DBI,EHHADH,EPRS,F2,FABP5,FGF12,FHL2,FKBP4,GAMT,GOT1,GPD1,GPD1L,GPD2,GPI,GPS1,GPT,GSTM1,GSTM2,HIBADH,HINT1,HMGCL,HSD17B4,IDH1,IDH2,ITIH4,KLHL31,LACTB,LARS,LDHA,LDHB,LTA4H,MAOB,MAPKAPK3,MCCC1,MCC…
GO:0006099	tricarboxylic acid cycle	8	32	3.68e-07	ENSP00000264932,ENSP00000331897,ENSP00000356953,ENSP00000367923,ENSP00000377446,ENSP00000390265,ENSP00000419325,ENSP00000440246	IDH1,IDH2,ME3,SDHA,SDHC,SUCLA2,SUCLG1,SUCLG2
GO:0006637	acyl-CoA metabolic process	11	88	4.28e-07	ENSP00000253382,ENSP00000265838,ENSP00000316924,ENSP00000363614,ENSP00000367923,ENSP00000377040,ENSP00000401831,ENSP00000419325,ENSP00000420914,ENSP00000422607,ENSP00000439012	AASS,ACAT1,ACSF2,ACSL1,ACSS1,ACSS2,DBI,HMGCL,HSD17B4,SUCLA2,SUCLG2
GO:0019359	nicotinamide nucleotide biosynthetic process	10	68	4.78e-07	ENSP00000222553,ENSP00000226253,ENSP00000297283,ENSP00000320171,ENSP00000331897,ENSP00000345771,ENSP00000378669,ENSP00000401508,ENSP00000405573,ENSP00000445175	ALDOA,ALDOC,GPI,IDH2,LDHA,NAMPT,NAPRT,PFKM,PGAM2,PKM
GO:0006006	glucose metabolic process	12	113	4.8e-07	ENSP00000005178,ENSP00000226253,ENSP00000297258,ENSP00000297283,ENSP00000301149,ENSP00000308610,ENSP00000314649,ENSP00000320171,ENSP00000345771,ENSP00000359539,ENSP00000378669,ENSP00000405573	ALDH5A1,ALDOA,ALDOC,FABP5,GOT1,GPD1,GPD2,GPI,PDK4,PFKM,PGAM2,PKM
GO:0009063	cellular amino acid catabolic process	12	114	5.2e-07	ENSP00000216185,ENSP00000265395,ENSP00000265594,ENSP00000265838,ENSP00000314649,ENSP00000343657,ENSP00000359539,ENSP00000363614,ENSP00000377040,ENSP00000378408,ENSP00000385828,ENSP00000387123	AASS,ACAT1,ALDH5A1,ALDH7A1,GOT1,GPT,HIBADH,HMGCL,MCCC1,MCCC2,TST,TXN2
GO:0090407	organophosphate biosynthetic process	25	577	5.37e-07	ENSP00000221476,ENSP00000222553,ENSP00000226253,ENSP00000236959,ENSP00000253382,ENSP00000258424,ENSP00000262030,ENSP00000265838,ENSP00000282541,ENSP00000297258,ENSP00000297283,ENSP00000301149,ENSP00000316924,ENSP00000320171,ENSP00000331897,ENSP00000333019,ENSP00000345771,ENSP00000378669,ENSP00000381736,ENSP00000389649,ENSP00000401508,ENSP00000405573,ENSP00000422607,ENSP00000432692,ENSP00000445175	ACAT1,ACSL1,ACSS1,ACSS2,ADSSL1,ALDOA,ALDOC,ATIC,ATP5A1,ATP5B,ATP5J,CKM,COX5B,FABP5,GPD1,GPD1L,GPI,IDH2,LDHA,NAMPT,NAPRT,PFKM,PGAM2,PKM,UQCC3
GO:0005975	carbohydrate metabolic process	22	457	6.84e-07	ENSP00000005178,ENSP00000164139,ENSP00000226253,ENSP00000261733,ENSP00000263593,ENSP00000282541,ENSP00000297258,ENSP00000297283,ENSP00000297785,ENSP00000301149,ENSP00000308610,ENSP00000314649,ENSP00000318318,ENSP00000320171,ENSP00000331897,ENSP00000345771,ENSP00000359539,ENSP00000378669,ENSP00000379386,ENSP00000390265,ENSP00000405573,ENSP00000445175	ALDH1A1,ALDH2,ALDH5A1,ALDOA,ALDOC,FABP5,GOT1,GPD1,GPD1L,GPD2,GPI,IDH1,IDH2,LDHA,LDHB,MPI,PDK4,PFKM,PGAM2,PKM,PYGM,SIAE
GO:0006101	citrate metabolic process	8	36	7.44e-07	ENSP00000264932,ENSP00000331897,ENSP00000356953,ENSP00000367923,ENSP00000377446,ENSP00000390265,ENSP00000419325,ENSP00000440246	IDH1,IDH2,ME3,SDHA,SDHC,SUCLA2,SUCLG1,SUCLG2
GO:0006629	lipid metabolic process	37	1192	9.57e-07	ENSP00000220764,ENSP00000221418,ENSP00000228740,ENSP00000231887,ENSP00000241337,ENSP00000253382,ENSP00000261893,ENSP00000262030,ENSP00000265838,ENSP00000282541,ENSP00000285093,ENSP00000297258,ENSP00000297785,ENSP00000299427,ENSP00000301149,ENSP00000312618,ENSP00000314649,ENSP00000315013,ENSP00000316924,ENSP00000342026,ENSP00000350314,ENSP00000351957,ENSP00000362817,ENSP00000363614,ENSP00000370023…	ACAA2,ACAD9,ACADVL,ACAT1,ACSF2,ACSL1,ACSS1,ACSS2,ALDH1A1,ALDH5A1,ASAH1,ATP5A1,ATP5B,BCO2,CRAT,DBI,DECR1,ECH1,EHHADH,EPHX2,ETFDH,FABP3,FABP5,GC,GPD1,GPD1L,GSTM2,HADHA,HMGCL,HSD17B4,LACTB,LSS,LTA4H,PCCB,PDE3A,PRDX6,TPP1
GO:0046394	carboxylic acid biosynthetic process	18	311	9.63e-07	ENSP00000226253,ENSP00000228740,ENSP00000236959,ENSP00000253382,ENSP00000297283,ENSP00000316924,ENSP00000320171,ENSP00000345771,ENSP00000359539,ENSP00000367923,ENSP00000377040,ENSP00000378408,ENSP00000378669,ENSP00000403536,ENSP00000405573,ENSP00000420914,ENSP00000430269,ENSP00000445175	AASS,ACSS1,ACSS2,ALDOA,ALDOC,ATIC,EPHX2,GAMT,GOT1,GPI,GPT,HSD17B4,LDHA,LTA4H,PFKM,PGAM2,PKM,SUCLA2
GO:0045055	regulated exocytosis	27	691	1.02e-06	ENSP00000226253,ENSP00000228740,ENSP00000236671,ENSP00000259396,ENSP00000262776,ENSP00000266041,ENSP00000270142,ENSP00000273550,ENSP00000278407,ENSP00000296456,ENSP00000297258,ENSP00000302621,ENSP00000320171,ENSP00000321853,ENSP00000342026,ENSP00000345672,ENSP00000348170,ENSP00000358307,ENSP00000359025,ENSP00000371152,ENSP00000376793,ENSP00000378669,ENSP00000390265,ENSP00000394936,ENSP00000401508…	ALDOA,ALDOC,APEH,ASAH1,CTSB,CTSD,FABP5,FTH1,GIG25,GPI,HP,IDH1,ITIH4,LGALS3BP,LRG1,LTA4H,NAPRT,NHLRC2,ORM1,ORM2,PKM,PRDX6,SERPINA1,SERPINF2,SERPING1,SOD1,STXBP3
GO:0033875	ribonucleoside bisphosphate metabolic process	12	123	1.04e-06	ENSP00000253382,ENSP00000265838,ENSP00000316924,ENSP00000343657,ENSP00000363614,ENSP00000367923,ENSP00000377040,ENSP00000401831,ENSP00000419325,ENSP00000420914,ENSP00000422607,ENSP00000439012	AASS,ACAT1,ACSF2,ACSL1,ACSS1,ACSS2,DBI,HMGCL,HSD17B4,MCCC2,SUCLA2,SUCLG2
GO:0034032	purine nucleoside bisphosphate metabolic process	12	123	1.04e-06	ENSP00000253382,ENSP00000265838,ENSP00000316924,ENSP00000343657,ENSP00000363614,ENSP00000367923,ENSP00000377040,ENSP00000401831,ENSP00000419325,ENSP00000420914,ENSP00000422607,ENSP00000439012	AASS,ACAT1,ACSF2,ACSL1,ACSS1,ACSS2,DBI,HMGCL,HSD17B4,MCCC2,SUCLA2,SUCLG2
GO:0042398	cellular modified amino acid biosynthetic process	8	41	1.64e-06	ENSP00000221476,ENSP00000236959,ENSP00000319851,ENSP00000325548,ENSP00000346827,ENSP00000387123,ENSP00000403536,ENSP00000480476	ALDH7A1,ALDH9A1,ATIC,CHDH,CKM,CNDP2,GAMT,OPLAH
GO:0003012	muscle system process	17	291	1.89e-06	ENSP00000241337,ENSP00000255381,ENSP00000270142,ENSP00000282541,ENSP00000297283,ENSP00000306163,ENSP00000356828,ENSP00000378669,ENSP00000380489,ENSP00000386041,ENSP00000403536,ENSP00000403902,ENSP00000404203,ENSP00000413496,ENSP00000440045,ENSP00000442795,ENSP00000484398	ALDOA,ANKRD2,ATP2A2,CKMT2,FGF12,GAMT,GPD1L,GSTM2,MB,MYBPC3,MYH4,MYH6,PGAM2,PPP1R13L,RCSD1,SMTN,SOD1
GO:0002443	leukocyte mediated immunity	25	632	2.54e-06	ENSP00000223642,ENSP00000226253,ENSP00000228740,ENSP00000236671,ENSP00000259396,ENSP00000263413,ENSP00000273550,ENSP00000278407,ENSP00000296456,ENSP00000297258,ENSP00000302621,ENSP00000308541,ENSP00000320171,ENSP00000342026,ENSP00000345672,ENSP00000348170,ENSP00000359025,ENSP00000371152,ENSP00000376793,ENSP00000378669,ENSP00000390265,ENSP00000394936,ENSP00000401508,ENSP00000405573,ENSP00000416066	ALDOA,ALDOC,APEH,ASAH1,C5,C6,CTSB,CTSD,F2,FABP5,FTH1,GIG25,GPI,HP,IDH1,LRG1,LTA4H,NAPRT,ORM1,ORM2,PKM,PRDX6,SERPINA1,SERPING1,STXBP3
GO:0002446	neutrophil mediated immunity	22	498	2.54e-06	ENSP00000226253,ENSP00000228740,ENSP00000236671,ENSP00000259396,ENSP00000273550,ENSP00000296456,ENSP00000297258,ENSP00000302621,ENSP00000308541,ENSP00000320171,ENSP00000342026,ENSP00000345672,ENSP00000348170,ENSP00000359025,ENSP00000371152,ENSP00000376793,ENSP00000378669,ENSP00000390265,ENSP00000394936,ENSP00000401508,ENSP00000405573,ENSP00000416066	ALDOA,ALDOC,APEH,ASAH1,CTSB,CTSD,F2,FABP5,FTH1,GIG25,GPI,HP,IDH1,LRG1,LTA4H,NAPRT,ORM1,ORM2,PKM,PRDX6,SERPINA1,STXBP3
GO:0006090	pyruvate metabolic process	9	66	3.72e-06	ENSP00000226253,ENSP00000297283,ENSP00000320171,ENSP00000345771,ENSP00000378669,ENSP00000379386,ENSP00000405573,ENSP00000440246,ENSP00000445175	ALDOA,ALDOC,GPI,LDHA,LDHB,ME3,PFKM,PGAM2,PKM
GO:0043312	neutrophil degranulation	21	485	6.61e-06	ENSP00000226253,ENSP00000228740,ENSP00000236671,ENSP00000259396,ENSP00000273550,ENSP00000296456,ENSP00000297258,ENSP00000302621,ENSP00000320171,ENSP00000342026,ENSP00000345672,ENSP00000348170,ENSP00000359025,ENSP00000371152,ENSP00000376793,ENSP00000378669,ENSP00000390265,ENSP00000394936,ENSP00000401508,ENSP00000405573,ENSP00000416066	ALDOA,ALDOC,APEH,ASAH1,CTSB,CTSD,FABP5,FTH1,GIG25,GPI,HP,IDH1,LRG1,LTA4H,NAPRT,ORM1,ORM2,PKM,PRDX6,SERPINA1,STXBP3
GO:0043933	protein-containing complex subunit organization	45	1770	6.77e-06	ENSP00000001008,ENSP00000199706,ENSP00000215565,ENSP00000220764,ENSP00000245539,ENSP00000254630,ENSP00000254950,ENSP00000259037,ENSP00000262878,ENSP00000263629,ENSP00000265594,ENSP00000265838,ENSP00000266544,ENSP00000296456,ENSP00000301457,ENSP00000312618,ENSP00000314649,ENSP00000315774,ENSP00000320171,ENSP00000321853,ENSP00000322450,ENSP00000326699,ENSP00000332887,ENSP00000343657,ENSP00000345259…	AASS,ACAD9,ACAT1,ALDH5A1,ALDOA,APEH,CLGN,DECR1,EPB41,EPRS,FKBP4,HMGCL,MCCC1,MCCC2,MRPL28,MRPS7,MTIF2,MYBPC3,NDUFA13,NDUFA5,NDUFA7,NDUFA8,NDUFA9,NDUFB5,NDUFB6,NDUFB7,NDUFS1,NDUFS2,NDUFS5,NDUFS8,NDUFV1,PFKM,PKM,PTCD3,RABGGTA,RPL6,SAMHD1,SERPINA1,SERPINF2,SLC9A3R2,STXBP3,TPPP,UQCC3,UQCR10,VPS4A
GO:0009435	NAD biosynthetic process	8	51	6.79e-06	ENSP00000222553,ENSP00000226253,ENSP00000297283,ENSP00000320171,ENSP00000345771,ENSP00000378669,ENSP00000401508,ENSP00000405573	ALDOA,ALDOC,GPI,NAMPT,NAPRT,PFKM,PGAM2,PKM
GO:0043648	dicarboxylic acid metabolic process	10	97	7.83e-06	ENSP00000236959,ENSP00000264932,ENSP00000314649,ENSP00000331897,ENSP00000333019,ENSP00000359539,ENSP00000367923,ENSP00000390265,ENSP00000419325,ENSP00000440246	ADSSL1,ALDH5A1,ATIC,GOT1,IDH1,IDH2,ME3,SDHA,SUCLA2,SUCLG2
GO:1901606	alpha-amino acid catabolic process	10	98	8.42e-06	ENSP00000265395,ENSP00000265594,ENSP00000265838,ENSP00000314649,ENSP00000343657,ENSP00000359539,ENSP00000363614,ENSP00000377040,ENSP00000378408,ENSP00000387123	AASS,ACAT1,ALDH5A1,ALDH7A1,GOT1,GPT,HIBADH,HMGCL,MCCC1,MCCC2
GO:0002576	platelet degranulation	11	129	1.14e-05	ENSP00000259396,ENSP00000262776,ENSP00000266041,ENSP00000270142,ENSP00000278407,ENSP00000321853,ENSP00000358307,ENSP00000376793,ENSP00000378669,ENSP00000394936,ENSP00000416066	ALDOA,GIG25,ITIH4,LGALS3BP,NHLRC2,ORM1,ORM2,SERPINA1,SERPINF2,SERPING1,SOD1
GO:0009987	cellular process	196	14652	1.28e-05	ENSP00000001008,ENSP00000005178,ENSP00000164139,ENSP00000171887,ENSP00000199706,ENSP00000215565,ENSP00000216185,ENSP00000220764,ENSP00000221418,ENSP00000221476,ENSP00000222553,ENSP00000223642,ENSP00000226253,ENSP00000228740,ENSP00000231887,ENSP00000236671,ENSP00000236959,ENSP00000241337,ENSP00000245539,ENSP00000246957,ENSP00000250378,ENSP00000253382,ENSP00000254630,ENSP00000254950,ENSP00000255381…	AASS,ACAA2,ACAD9,ACADVL,ACAT1,ACSF2,ACSL1,ACSS1,ACSS2,ACSS3,ADCK3,ADH1B,ADSSL1,ALDH1A1,ALDH2,ALDH5A1,ALDH7A1,ALDH9A1,ALDOA,ALDOC,ANKRD2,APEH,ART3,ASAH1,ATIC,ATP2A2,ATP5A1,ATP5B,ATP5J,ATP6V1A,BCO2,C5,C6,C6orf211,CHDH,CKB,CKM,CKMT2,CLGN,CMA1,CNDP2,COX5A,COX5B,COX7A1,CP,CPA3,CRAT,CTSB,CTSD,DBI,DECR1,ECH1,EHD2,EHHADH,EML1,EPB41,EPB41L2,EPHX2,EPRS,ETFDH,EZR,F2,FABP3,FABP5,FGF12,FHL2,FKBP4,FTH1,GAMT,GI…
GO:0016052	carbohydrate catabolic process	10	104	1.34e-05	ENSP00000164139,ENSP00000226253,ENSP00000297283,ENSP00000297785,ENSP00000308610,ENSP00000320171,ENSP00000345771,ENSP00000378669,ENSP00000405573,ENSP00000445175	ALDH1A1,ALDOA,ALDOC,GPD2,GPI,LDHA,PFKM,PGAM2,PKM,PYGM
GO:0006096	glycolytic process	7	38	1.35e-05	ENSP00000226253,ENSP00000297283,ENSP00000320171,ENSP00000345771,ENSP00000378669,ENSP00000405573,ENSP00000445175	ALDOA,ALDOC,GPI,LDHA,PFKM,PGAM2,PKM
GO:0006757	ATP generation from ADP	7	39	1.55e-05	ENSP00000226253,ENSP00000297283,ENSP00000320171,ENSP00000345771,ENSP00000378669,ENSP00000405573,ENSP00000445175	ALDOA,ALDOC,GPI,LDHA,PFKM,PGAM2,PKM
GO:0006069	ethanol oxidation	5	12	1.92e-05	ENSP00000253382,ENSP00000261733,ENSP00000297785,ENSP00000306606,ENSP00000316924	ACSS1,ACSS2,ADH1B,ALDH1A1,ALDH2
GO:0006735	NADH regeneration	6	25	2.2e-05	ENSP00000226253,ENSP00000297283,ENSP00000320171,ENSP00000345771,ENSP00000378669,ENSP00000405573	ALDOA,ALDOC,GPI,PFKM,PGAM2,PKM
GO:0061621	canonical glycolysis	6	25	2.2e-05	ENSP00000226253,ENSP00000297283,ENSP00000320171,ENSP00000345771,ENSP00000378669,ENSP00000405573	ALDOA,ALDOC,GPI,PFKM,PGAM2,PKM
GO:0061718	glucose catabolic process to pyruvate	6	25	2.2e-05	ENSP00000226253,ENSP00000297283,ENSP00000320171,ENSP00000345771,ENSP00000378669,ENSP00000405573	ALDOA,ALDOC,GPI,PFKM,PGAM2,PKM
GO:0042866	pyruvate biosynthetic process	7	42	2.32e-05	ENSP00000226253,ENSP00000297283,ENSP00000320171,ENSP00000345771,ENSP00000378669,ENSP00000405573,ENSP00000445175	ALDOA,ALDOC,GPI,LDHA,PFKM,PGAM2,PKM
GO:1901360	organic cyclic compound metabolic process	89	4963	2.47e-05	ENSP00000215565,ENSP00000222553,ENSP00000226253,ENSP00000236959,ENSP00000241337,ENSP00000253382,ENSP00000255381,ENSP00000258424,ENSP00000259037,ENSP00000262030,ENSP00000262878,ENSP00000264657,ENSP00000264932,ENSP00000265462,ENSP00000265594,ENSP00000265838,ENSP00000266544,ENSP00000273398,ENSP00000274813,ENSP00000282541,ENSP00000285093,ENSP00000297283,ENSP00000301149,ENSP00000301457,ENSP00000304229…	AASS,ACAA2,ACAT1,ACSF2,ACSL1,ACSS1,ACSS2,ADSSL1,ALDOA,ALDOC,ATIC,ATP5A1,ATP5B,ATP5J,ATP6V1A,COX5A,COX5B,DBI,EPHX2,EPRS,FHL2,GAMT,GC,GPD1,GPD1L,GPD2,GPI,GPS1,GSTM1,GSTM2,HINT1,HMGCL,HSD17B4,IDH1,IDH2,KLHL31,LARS,LDHA,LDHB,LSS,MAOB,MCCC1,MCCC2,MFN1,MPI,MT-CO2,MUT,MYH4,MYH6,NACA,NAMPT,NAPRT,NDUFA5,NDUFA7,NDUFA8,NDUFA9,NDUFB5,NDUFB6,NDUFB7,NDUFS1,NDUFS2,NDUFS5,NDUFS8,NDUFV1,NUDT2,NUDT4,PABPC1,PCCA,PC…
GO:0006936	muscle contraction	14	244	2.67e-05	ENSP00000255381,ENSP00000282541,ENSP00000297283,ENSP00000306163,ENSP00000356828,ENSP00000378669,ENSP00000380489,ENSP00000386041,ENSP00000403536,ENSP00000403902,ENSP00000404203,ENSP00000413496,ENSP00000442795,ENSP00000484398	ALDOA,ANKRD2,CKMT2,FGF12,GAMT,GPD1L,MB,MYBPC3,MYH4,MYH6,PGAM2,PPP1R13L,RCSD1,SMTN
GO:0043604	amide biosynthetic process	20	495	2.98e-05	ENSP00000199706,ENSP00000236959,ENSP00000245539,ENSP00000253382,ENSP00000254630,ENSP00000263629,ENSP00000265838,ENSP00000296456,ENSP00000301457,ENSP00000313007,ENSP00000316924,ENSP00000325548,ENSP00000347495,ENSP00000355890,ENSP00000377954,ENSP00000403172,ENSP00000422607,ENSP00000448035,ENSP00000472847,ENSP00000480476	ACAT1,ACSL1,ACSS1,ACSS2,APEH,ATIC,CNDP2,EPRS,LARS,MRPL28,MRPS7,MTIF2,NACA,NDUFA7,OPLAH,PABPC1,PTCD3,RPL6,SARS2,WARS
GO:0065003	protein-containing complex assembly	39	1514	2.98e-05	ENSP00000001008,ENSP00000215565,ENSP00000220764,ENSP00000245539,ENSP00000259037,ENSP00000262878,ENSP00000265594,ENSP00000265838,ENSP00000266544,ENSP00000301457,ENSP00000312618,ENSP00000314649,ENSP00000315774,ENSP00000320171,ENSP00000322450,ENSP00000326699,ENSP00000332887,ENSP00000343657,ENSP00000345259,ENSP00000345771,ENSP00000353785,ENSP00000355890,ENSP00000356972,ENSP00000359025,ENSP00000362060…	AASS,ACAD9,ACAT1,ALDH5A1,ALDOA,CLGN,DECR1,EPB41,EPRS,FKBP4,HMGCL,MCCC1,MCCC2,MRPS7,MYBPC3,NDUFA13,NDUFA5,NDUFA7,NDUFA8,NDUFA9,NDUFB5,NDUFB6,NDUFB7,NDUFS1,NDUFS2,NDUFS5,NDUFS8,NDUFV1,PFKM,PKM,RABGGTA,RPL6,SAMHD1,SERPINA1,SLC9A3R2,STXBP3,TPPP,UQCC3,UQCR10
GO:0044255	cellular lipid metabolic process	29	946	3.09e-05	ENSP00000220764,ENSP00000221418,ENSP00000228740,ENSP00000231887,ENSP00000241337,ENSP00000253382,ENSP00000265838,ENSP00000282541,ENSP00000285093,ENSP00000297258,ENSP00000297785,ENSP00000301149,ENSP00000312618,ENSP00000314649,ENSP00000315013,ENSP00000316924,ENSP00000342026,ENSP00000350314,ENSP00000362817,ENSP00000370023,ENSP00000371152,ENSP00000401831,ENSP00000419027,ENSP00000420914,ENSP00000422607…	ACAA2,ACAD9,ACADVL,ACAT1,ACSF2,ACSL1,ACSS1,ACSS2,ALDH1A1,ALDH5A1,ASAH1,BCO2,CRAT,DBI,DECR1,ECH1,EHHADH,EPHX2,ETFDH,FABP3,FABP5,GPD1,GPD1L,GSTM2,HADHA,HSD17B4,LTA4H,PCCB,PRDX6
GO:0006094	gluconeogenesis	7	46	3.79e-05	ENSP00000226253,ENSP00000297283,ENSP00000301149,ENSP00000308610,ENSP00000359539,ENSP00000378669,ENSP00000405573	ALDOA,ALDOC,GOT1,GPD1,GPD2,GPI,PGAM2
GO:0019320	hexose catabolic process	7	49	5.48e-05	ENSP00000226253,ENSP00000297283,ENSP00000297785,ENSP00000320171,ENSP00000345771,ENSP00000378669,ENSP00000405573	ALDH1A1,ALDOA,ALDOC,GPI,PFKM,PGAM2,PKM
GO:0002366	leukocyte activation involved in immune response	22	616	5.92e-05	ENSP00000226253,ENSP00000228740,ENSP00000236671,ENSP00000259396,ENSP00000264657,ENSP00000273550,ENSP00000296456,ENSP00000297258,ENSP00000302621,ENSP00000320171,ENSP00000342026,ENSP00000345672,ENSP00000348170,ENSP00000359025,ENSP00000371152,ENSP00000376793,ENSP00000378669,ENSP00000390265,ENSP00000394936,ENSP00000401508,ENSP00000405573,ENSP00000416066	ALDOA,ALDOC,APEH,ASAH1,CTSB,CTSD,FABP5,FTH1,GIG25,GPI,HP,IDH1,LRG1,LTA4H,NAPRT,ORM1,ORM2,PKM,PRDX6,SERPINA1,STAT3,STXBP3
GO:0002252	immune effector process	28	927	6.02e-05	ENSP00000223642,ENSP00000226253,ENSP00000228740,ENSP00000236671,ENSP00000255030,ENSP00000259396,ENSP00000262878,ENSP00000263413,ENSP00000264657,ENSP00000273550,ENSP00000278407,ENSP00000296456,ENSP00000297258,ENSP00000302621,ENSP00000308541,ENSP00000320171,ENSP00000342026,ENSP00000345672,ENSP00000348170,ENSP00000359025,ENSP00000371152,ENSP00000376793,ENSP00000378669,ENSP00000390265,ENSP00000394936…	ALDOA,ALDOC,APEH,ASAH1,C5,C6,CRP,CTSB,CTSD,F2,FABP5,FTH1,GIG25,GPI,HP,IDH1,LRG1,LTA4H,NAPRT,ORM1,ORM2,PKM,PRDX6,SAMHD1,SERPINA1,SERPING1,STAT3,STXBP3
GO:0006749	glutathione metabolic process	7	52	7.55e-05	ENSP00000241337,ENSP00000270142,ENSP00000311469,ENSP00000314649,ENSP00000325548,ENSP00000390265,ENSP00000480476	ALDH5A1,CNDP2,GSTM1,GSTM2,IDH1,OPLAH,SOD1
GO:0006768	biotin metabolic process	4	7	8.49e-05	ENSP00000265594,ENSP00000343657,ENSP00000365462,ENSP00000419027	MCCC1,MCCC2,PCCA,PCCB
GO:0009083	branched-chain amino acid catabolic process	5	18	8.56e-05	ENSP00000265395,ENSP00000265594,ENSP00000265838,ENSP00000343657,ENSP00000363614	ACAT1,HIBADH,HMGCL,MCCC1,MCCC2
GO:0072330	monocarboxylic acid biosynthetic process	12	200	9.07e-05	ENSP00000226253,ENSP00000228740,ENSP00000253382,ENSP00000297283,ENSP00000316924,ENSP00000320171,ENSP00000345771,ENSP00000378669,ENSP00000405573,ENSP00000420914,ENSP00000430269,ENSP00000445175	ACSS1,ACSS2,ALDOA,ALDOC,EPHX2,GPI,HSD17B4,LDHA,LTA4H,PFKM,PGAM2,PKM
GO:0006941	striated muscle contraction	9	111	0.00014	ENSP00000282541,ENSP00000297283,ENSP00000356828,ENSP00000378669,ENSP00000380489,ENSP00000386041,ENSP00000403902,ENSP00000413496,ENSP00000442795	ALDOA,FGF12,GPD1L,MB,MYBPC3,MYH6,PGAM2,PPP1R13L,RCSD1
GO:0046483	heterocycle metabolic process	83	4716	0.00014	ENSP00000215565,ENSP00000222553,ENSP00000226253,ENSP00000236959,ENSP00000253382,ENSP00000255381,ENSP00000258424,ENSP00000259037,ENSP00000262030,ENSP00000262878,ENSP00000264657,ENSP00000264932,ENSP00000265462,ENSP00000265594,ENSP00000265838,ENSP00000266544,ENSP00000273398,ENSP00000274813,ENSP00000282541,ENSP00000297283,ENSP00000301149,ENSP00000301457,ENSP00000304229,ENSP00000308610,ENSP00000313007…	AASS,ACAT1,ACSF2,ACSL1,ACSS1,ACSS2,ADSSL1,ALDOA,ALDOC,ATIC,ATP5A1,ATP5B,ATP5J,ATP6V1A,COX5A,COX5B,DBI,EPHX2,EPRS,FHL2,GAMT,GPD1,GPD1L,GPD2,GPI,GPS1,HINT1,HMGCL,HSD17B4,IDH1,IDH2,KLHL31,LARS,LDHA,LDHB,MCCC1,MCCC2,MFN1,MPI,MT-CO2,MUT,MYH4,MYH6,NACA,NAMPT,NAPRT,NDUFA5,NDUFA7,NDUFA8,NDUFA9,NDUFB5,NDUFB6,NDUFB7,NDUFS1,NDUFS2,NDUFS5,NDUFS8,NDUFV1,NUDT2,NUDT4,PABPC1,PCCA,PCCB,PDE3A,PERM1,PFKM,PGAM2,PKM,…
GO:0006979	response to oxidative stress	16	373	0.00015	ENSP00000216185,ENSP00000265462,ENSP00000270142,ENSP00000306163,ENSP00000315774,ENSP00000342026,ENSP00000348170,ENSP00000356972,ENSP00000368455,ENSP00000380489,ENSP00000390265,ENSP00000401508,ENSP00000426638,ENSP00000440045,ENSP00000445175,ENSP00000457733	ANKRD2,ATP2A2,ETFDH,HP,IDH1,LDHA,MB,NAPRT,NDUFS2,NDUFS8,NUDT2,PRDX5,PRDX6,SLC25A24,SOD1,TXN2
GO:0009081	branched-chain amino acid metabolic process	5	21	0.00015	ENSP00000265395,ENSP00000265594,ENSP00000265838,ENSP00000343657,ENSP00000363614	ACAT1,HIBADH,HMGCL,MCCC1,MCCC2
GO:0006725	cellular aromatic compound metabolic process	83	4754	0.00018	ENSP00000215565,ENSP00000222553,ENSP00000226253,ENSP00000236959,ENSP00000241337,ENSP00000253382,ENSP00000255381,ENSP00000258424,ENSP00000259037,ENSP00000262030,ENSP00000262878,ENSP00000264657,ENSP00000264932,ENSP00000265462,ENSP00000265838,ENSP00000266544,ENSP00000273398,ENSP00000274813,ENSP00000282541,ENSP00000297283,ENSP00000301149,ENSP00000301457,ENSP00000304229,ENSP00000308610,ENSP00000311469…	AASS,ACAT1,ACSF2,ACSL1,ACSS1,ACSS2,ADSSL1,ALDOA,ALDOC,ATIC,ATP5A1,ATP5B,ATP5J,ATP6V1A,COX5A,COX5B,DBI,EPHX2,EPRS,FHL2,GAMT,GPD1,GPD1L,GPD2,GPI,GPS1,GSTM1,GSTM2,HINT1,HMGCL,HSD17B4,IDH1,IDH2,KLHL31,LARS,LDHA,LDHB,MAOB,MCCC2,MFN1,MPI,MT-CO2,MUT,MYH4,MYH6,NACA,NAMPT,NAPRT,NDUFA5,NDUFA7,NDUFA8,NDUFA9,NDUFB5,NDUFB6,NDUFB7,NDUFS1,NDUFS2,NDUFS5,NDUFS8,NDUFV1,NUDT2,NUDT4,PABPC1,PDE3A,PERM1,PFKM,PGAM2,PKM…
GO:0006950	response to stress	63	3267	0.00018	ENSP00000005178,ENSP00000216185,ENSP00000223642,ENSP00000241337,ENSP00000246957,ENSP00000255030,ENSP00000259396,ENSP00000262776,ENSP00000262878,ENSP00000263277,ENSP00000263413,ENSP00000264657,ENSP00000265462,ENSP00000265838,ENSP00000266041,ENSP00000270142,ENSP00000278222,ENSP00000278407,ENSP00000285093,ENSP00000291700,ENSP00000299427,ENSP00000306163,ENSP00000308541,ENSP00000311469,ENSP00000315774…	ACAA2,ACADVL,ACAT1,ADSSL1,ANKRD2,ATP2A2,C5,C6,C6orf211,CRP,EHD2,EPHX2,EPRS,ETFDH,F2,FGF12,GIG25,GOT1,GPS1,GSTM1,GSTM2,HMGCL,HP,IDH1,ITIH4,LARS,LDHA,LGALS3BP,MB,MT-CO2,MYH6,MYLK3,NACA,NAPRT,NDUFS2,NDUFS8,NPEPPS,NUDT2,OPTN,ORM1,ORM2,PDK4,PKM,PRDX5,PRDX6,RCSD1,RRAGA,RRAGD,S100B,SAA1,SAA2,SAA4,SAMHD1,SERPINA1,SERPINF2,SERPING1,SLC25A24,SOD1,STAT3,STXBP3,TPP1,TRAP1,TXN2
GO:0007006	mitochondrial membrane organization	9	123	0.0003	ENSP00000262030,ENSP00000264657,ENSP00000281456,ENSP00000285093,ENSP00000381736,ENSP00000389649,ENSP00000420617,ENSP00000423673,ENSP00000432692	ACAA2,ATP5A1,ATP5B,ATP5J,MFN1,NDUFA13,SLC25A4,STAT3,UQCC3
GO:0006105	succinate metabolic process	4	11	0.00031	ENSP00000264932,ENSP00000314649,ENSP00000367923,ENSP00000419325	ALDH5A1,SDHA,SUCLA2,SUCLG2
GO:0006600	creatine metabolic process	4	11	0.00031	ENSP00000221476,ENSP00000299198,ENSP00000403536,ENSP00000404203	CKB,CKM,CKMT2,GAMT
GO:0006625	protein targeting to peroxisome	7	68	0.00033	ENSP00000221418,ENSP00000231887,ENSP00000315013,ENSP00000363614,ENSP00000390265,ENSP00000420914,ENSP00000430269	CRAT,ECH1,EHHADH,EPHX2,HMGCL,HSD17B4,IDH1
GO:0034308	primary alcohol metabolic process	7	69	0.00036	ENSP00000253382,ENSP00000261733,ENSP00000297785,ENSP00000301149,ENSP00000306606,ENSP00000308610,ENSP00000316924	ACSS1,ACSS2,ADH1B,ALDH1A1,ALDH2,GPD1,GPD2
GO:0017000	antibiotic biosynthetic process	4	12	0.00039	ENSP00000253382,ENSP00000270142,ENSP00000316924,ENSP00000367309	ACSS1,ACSS2,MAOB,SOD1
GO:0006083	acetate metabolic process	3	3	0.00042	ENSP00000253382,ENSP00000314649,ENSP00000316924	ACSS1,ACSS2,ALDH5A1
GO:1901615	organic hydroxy compound metabolic process	16	420	0.00054	ENSP00000253382,ENSP00000261733,ENSP00000285093,ENSP00000297785,ENSP00000301149,ENSP00000306606,ENSP00000308610,ENSP00000316924,ENSP00000338352,ENSP00000359539,ENSP00000367309,ENSP00000379386,ENSP00000380837,ENSP00000420914,ENSP00000421725,ENSP00000445175	ACAA2,ACSS1,ACSS2,ADH1B,ALDH1A1,ALDH2,GC,GOT1,GPD1,GPD2,HSD17B4,LDHA,LDHB,LSS,MAOB,NUDT4
GO:0072593	reactive oxygen species metabolic process	8	103	0.00055	ENSP00000005178,ENSP00000265462,ENSP00000270142,ENSP00000342026,ENSP00000367309,ENSP00000392709,ENSP00000423673,ENSP00000430269	EPHX2,MAOB,NDUFA13,NDUFS1,PDK4,PRDX5,PRDX6,SOD1
GO:0030866	cortical actin cytoskeleton organization	5	30	0.00063	ENSP00000254950,ENSP00000263277,ENSP00000338481,ENSP00000345259,ENSP00000356042	EHD2,EPB41,EPB41L2,EZR,VPS4A
GO:0046903	secretion	28	1070	0.00064	ENSP00000226253,ENSP00000228740,ENSP00000236671,ENSP00000259396,ENSP00000262776,ENSP00000266041,ENSP00000270142,ENSP00000273550,ENSP00000278407,ENSP00000296456,ENSP00000297258,ENSP00000302621,ENSP00000320171,ENSP00000321853,ENSP00000342026,ENSP00000345672,ENSP00000348170,ENSP00000354876,ENSP00000358307,ENSP00000359025,ENSP00000371152,ENSP00000376793,ENSP00000378669,ENSP00000390265,ENSP00000394936…	ALDOA,ALDOC,APEH,ASAH1,CTSB,CTSD,FABP5,FTH1,GIG25,GPI,HP,IDH1,ITIH4,LGALS3BP,LRG1,LTA4H,MT-CO2,NAPRT,NHLRC2,ORM1,ORM2,PKM,PRDX6,SERPINA1,SERPINF2,SERPING1,SOD1,STXBP3
GO:0006139	nucleobase-containing compound metabolic process	78	4551	0.0007	ENSP00000215565,ENSP00000222553,ENSP00000226253,ENSP00000236959,ENSP00000253382,ENSP00000255381,ENSP00000258424,ENSP00000259037,ENSP00000262030,ENSP00000262878,ENSP00000264657,ENSP00000264932,ENSP00000265462,ENSP00000265838,ENSP00000266544,ENSP00000273398,ENSP00000282541,ENSP00000297283,ENSP00000301149,ENSP00000301457,ENSP00000304229,ENSP00000308610,ENSP00000313007,ENSP00000315774,ENSP00000316924…	AASS,ACAT1,ACSF2,ACSL1,ACSS1,ACSS2,ADSSL1,ALDOA,ALDOC,ATIC,ATP5A1,ATP5B,ATP5J,ATP6V1A,COX5A,COX5B,DBI,EPRS,FHL2,GAMT,GPD1,GPD1L,GPD2,GPI,GPS1,HINT1,HMGCL,HSD17B4,IDH1,IDH2,KLHL31,LARS,LDHA,LDHB,MCCC2,MFN1,MPI,MT-CO2,MYH4,MYH6,NACA,NAMPT,NAPRT,NDUFA5,NDUFA7,NDUFA8,NDUFA9,NDUFB5,NDUFB6,NDUFB7,NDUFS1,NDUFS2,NDUFS5,NDUFS8,NDUFV1,NUDT2,NUDT4,PABPC1,PDE3A,PERM1,PFKM,PGAM2,PKM,PPP1R13L,PRDX5,RPL6,SAMHD1…
GO:0043043	peptide biosynthetic process	15	386	0.00075	ENSP00000199706,ENSP00000245539,ENSP00000254630,ENSP00000263629,ENSP00000296456,ENSP00000301457,ENSP00000313007,ENSP00000325548,ENSP00000347495,ENSP00000355890,ENSP00000377954,ENSP00000403172,ENSP00000448035,ENSP00000472847,ENSP00000480476	APEH,CNDP2,EPRS,LARS,MRPL28,MRPS7,MTIF2,NACA,NDUFA7,OPLAH,PABPC1,PTCD3,RPL6,SARS2,WARS
GO:0006954	inflammatory response	17	482	0.00076	ENSP00000223642,ENSP00000255030,ENSP00000259396,ENSP00000264657,ENSP00000265462,ENSP00000266041,ENSP00000278222,ENSP00000308541,ENSP00000321853,ENSP00000348170,ENSP00000376793,ENSP00000378288,ENSP00000384906,ENSP00000394936,ENSP00000416066,ENSP00000430269,ENSP00000436126	C5,CRP,EPHX2,F2,GIG25,HP,ITIH4,MYLK3,ORM1,ORM2,PRDX5,SAA1,SAA2,SAA4,SERPINA1,SERPINF2,STAT3
GO:0006810	transport	72	4130	0.00092	ENSP00000001008,ENSP00000221418,ENSP00000226253,ENSP00000228740,ENSP00000231887,ENSP00000236671,ENSP00000254950,ENSP00000255030,ENSP00000258424,ENSP00000259396,ENSP00000261187,ENSP00000262030,ENSP00000262776,ENSP00000263277,ENSP00000264613,ENSP00000264657,ENSP00000266041,ENSP00000266544,ENSP00000270142,ENSP00000273398,ENSP00000273550,ENSP00000278407,ENSP00000281456,ENSP00000285093,ENSP00000292907…	ACAA2,ACSL1,ALDOA,ALDOC,APEH,ASAH1,ATP2A2,ATP5A1,ATP5B,ATP5J,ATP6V1A,CA4,COX5A,COX5B,COX7A1,CP,CRAT,CRP,CTSB,CTSD,ECH1,EHD2,EHHADH,EPHX2,EPRS,EZR,F2,FABP3,FABP5,FKBP4,FTH1,GC,GIG25,GPI,HMGCL,HP,HSD17B4,IDH1,ITIH4,LARS,LGALS3BP,LRG1,LTA4H,MAPKAPK3,MB,MT-CO2,NACA,NAPRT,NDUFA13,NDUFA9,NHLRC2,NOSTRIN,OPTN,ORM1,ORM2,PKM,PRDX6,RPL6,SAA1,SELENBP1,SERPINA1,SERPINF2,SERPING1,SLC16A7,SLC25A24,SLC25A4,SOD1,…
GO:0006552	leucine catabolic process	3	5	0.0011	ENSP00000265594,ENSP00000343657,ENSP00000363614	HMGCL,MCCC1,MCCC2
GO:0006577	amino-acid betaine metabolic process	4	17	0.0011	ENSP00000315013,ENSP00000319851,ENSP00000346827,ENSP00000387123	ALDH7A1,ALDH9A1,CHDH,CRAT
GO:0042776	mitochondrial ATP synthesis coupled proton transport	4	17	0.0011	ENSP00000258424,ENSP00000262030,ENSP00000381736,ENSP00000389649	ATP5A1,ATP5B,ATP5J,COX5B
GO:0019439	aromatic compound catabolic process	16	453	0.0012	ENSP00000226253,ENSP00000262878,ENSP00000265838,ENSP00000297283,ENSP00000304229,ENSP00000313007,ENSP00000320171,ENSP00000338352,ENSP00000345771,ENSP00000351957,ENSP00000367309,ENSP00000378669,ENSP00000403172,ENSP00000405573,ENSP00000430269,ENSP00000445175	ACAT1,ALDOA,ALDOC,EPHX2,GPI,HINT1,LDHA,MAOB,NUDT4,PABPC1,PDE3A,PFKM,PGAM2,PKM,RPL6,SAMHD1
GO:1901565	organonitrogen compound catabolic process	25	958	0.0017	ENSP00000216185,ENSP00000228740,ENSP00000236671,ENSP00000254950,ENSP00000262878,ENSP00000265395,ENSP00000265594,ENSP00000265838,ENSP00000269298,ENSP00000299427,ENSP00000304229,ENSP00000314649,ENSP00000319851,ENSP00000320324,ENSP00000338352,ENSP00000343657,ENSP00000345672,ENSP00000351957,ENSP00000359539,ENSP00000363614,ENSP00000367309,ENSP00000377040,ENSP00000378408,ENSP00000385828,ENSP00000387123	AASS,ACAT1,ALDH5A1,ALDH7A1,CHDH,CTSB,CTSD,GOT1,GPT,HIBADH,HINT1,HMGCL,LTA4H,MAOB,MCCC1,MCCC2,NPEPPS,NUDT4,PDE3A,SAMHD1,SAT2,TPP1,TST,TXN2,VPS4A
GO:0008015	blood circulation	14	373	0.0018	ENSP00000250378,ENSP00000255030,ENSP00000270142,ENSP00000278407,ENSP00000282541,ENSP00000296046,ENSP00000321853,ENSP00000351957,ENSP00000378288,ENSP00000386041,ENSP00000403902,ENSP00000413496,ENSP00000430269,ENSP00000442795	CMA1,CPA3,CRP,EPHX2,FGF12,GPD1L,MYBPC3,MYH6,MYLK3,PDE3A,PPP1R13L,SERPINF2,SERPING1,SOD1
GO:1901137	carbohydrate derivative biosynthetic process	19	625	0.0018	ENSP00000226253,ENSP00000236959,ENSP00000253382,ENSP00000258424,ENSP00000262030,ENSP00000265838,ENSP00000297283,ENSP00000316924,ENSP00000318318,ENSP00000320171,ENSP00000333019,ENSP00000345771,ENSP00000378669,ENSP00000381736,ENSP00000389649,ENSP00000405573,ENSP00000422607,ENSP00000432692,ENSP00000445175	ACAT1,ACSL1,ACSS1,ACSS2,ADSSL1,ALDOA,ALDOC,ATIC,ATP5A1,ATP5B,ATP5J,COX5B,GPI,LDHA,MPI,PFKM,PGAM2,PKM,UQCC3
GO:0006081	cellular aldehyde metabolic process	6	64	0.0019	ENSP00000297785,ENSP00000331897,ENSP00000346827,ENSP00000350314,ENSP00000387123,ENSP00000390265	ALDH1A1,ALDH7A1,ALDH9A1,BCO2,IDH1,IDH2
GO:0006072	glycerol-3-phosphate metabolic process	3	7	0.0022	ENSP00000282541,ENSP00000301149,ENSP00000308610	GPD1,GPD1L,GPD2
GO:0006551	leucine metabolic process	3	7	0.0022	ENSP00000265594,ENSP00000343657,ENSP00000363614	HMGCL,MCCC1,MCCC2
GO:0006578	amino-acid betaine biosynthetic process	3	7	0.0022	ENSP00000319851,ENSP00000346827,ENSP00000387123	ALDH7A1,ALDH9A1,CHDH
GO:0007007	inner mitochondrial membrane organization	5	41	0.0022	ENSP00000262030,ENSP00000381736,ENSP00000389649,ENSP00000423673,ENSP00000432692	ATP5A1,ATP5B,ATP5J,NDUFA13,UQCC3
GO:0030258	lipid modification	11	245	0.0022	ENSP00000220764,ENSP00000221418,ENSP00000231887,ENSP00000265838,ENSP00000285093,ENSP00000315013,ENSP00000370023,ENSP00000420914,ENSP00000426638,ENSP00000430269,ENSP00000438689	ACAA2,ACADVL,ACAT1,CRAT,DECR1,ECH1,EHHADH,EPHX2,ETFDH,HADHA,HSD17B4
GO:0042135	neurotransmitter catabolic process	4	21	0.0022	ENSP00000314649,ENSP00000319851,ENSP00000367309,ENSP00000387123	ALDH5A1,ALDH7A1,CHDH,MAOB
GO:0031032	actomyosin structure organization	7	97	0.0023	ENSP00000254950,ENSP00000338481,ENSP00000345259,ENSP00000378288,ENSP00000386041,ENSP00000401437,ENSP00000442795	EPB41,EPB41L2,LDB3,MYBPC3,MYH6,MYLK3,VPS4A
GO:1901361	organic cyclic compound catabolic process	16	484	0.0023	ENSP00000226253,ENSP00000262878,ENSP00000265838,ENSP00000297283,ENSP00000304229,ENSP00000313007,ENSP00000320171,ENSP00000338352,ENSP00000345771,ENSP00000351957,ENSP00000367309,ENSP00000378669,ENSP00000403172,ENSP00000405573,ENSP00000430269,ENSP00000445175	ACAT1,ALDOA,ALDOC,EPHX2,GPI,HINT1,LDHA,MAOB,NUDT4,PABPC1,PDE3A,PFKM,PGAM2,PKM,RPL6,SAMHD1
GO:0044270	cellular nitrogen compound catabolic process	15	441	0.0028	ENSP00000226253,ENSP00000262878,ENSP00000265838,ENSP00000297283,ENSP00000304229,ENSP00000313007,ENSP00000320171,ENSP00000338352,ENSP00000345771,ENSP00000351957,ENSP00000378669,ENSP00000385828,ENSP00000403172,ENSP00000405573,ENSP00000445175	ACAT1,ALDOA,ALDOC,GPI,HINT1,LDHA,NUDT4,PABPC1,PDE3A,PFKM,PGAM2,PKM,RPL6,SAMHD1,TST
GO:0006195	purine nucleotide catabolic process	5	44	0.0029	ENSP00000262878,ENSP00000265838,ENSP00000304229,ENSP00000338352,ENSP00000351957	ACAT1,HINT1,NUDT4,PDE3A,SAMHD1
GO:0034655	nucleobase-containing compound catabolic process	14	394	0.0029	ENSP00000226253,ENSP00000262878,ENSP00000265838,ENSP00000297283,ENSP00000304229,ENSP00000313007,ENSP00000320171,ENSP00000338352,ENSP00000345771,ENSP00000351957,ENSP00000378669,ENSP00000403172,ENSP00000405573,ENSP00000445175	ACAT1,ALDOA,ALDOC,GPI,HINT1,LDHA,NUDT4,PABPC1,PDE3A,PFKM,PGAM2,PKM,RPL6,SAMHD1
GO:0016192	vesicle-mediated transport	36	1699	0.003	ENSP00000226253,ENSP00000228740,ENSP00000236671,ENSP00000254950,ENSP00000255030,ENSP00000259396,ENSP00000262776,ENSP00000263277,ENSP00000266041,ENSP00000270142,ENSP00000273550,ENSP00000278407,ENSP00000296456,ENSP00000297258,ENSP00000302621,ENSP00000308541,ENSP00000320171,ENSP00000321853,ENSP00000342026,ENSP00000345672,ENSP00000348170,ENSP00000356042,ENSP00000358307,ENSP00000359025,ENSP00000368022…	ALDOA,ALDOC,APEH,ASAH1,CRP,CTSB,CTSD,EHD2,EZR,F2,FABP5,FTH1,GIG25,GPI,HP,IDH1,ITIH4,LGALS3BP,LRG1,LTA4H,MAPKAPK3,NAPRT,NHLRC2,NOSTRIN,OPTN,ORM1,ORM2,PKM,PRDX6,SAA1,SERPINA1,SERPINF2,SERPING1,SOD1,STXBP3,VPS4A
GO:0051193	regulation of cofactor metabolic process	6	71	0.003	ENSP00000005178,ENSP00000264657,ENSP00000297283,ENSP00000301149,ENSP00000348170,ENSP00000354876	GPD1,HP,MT-CO2,PDK4,PGAM2,STAT3
GO:1902600	proton transmembrane transport	8	137	0.0031	ENSP00000258424,ENSP00000262030,ENSP00000273398,ENSP00000292907,ENSP00000317780,ENSP00000354876,ENSP00000381736,ENSP00000389649	ATP5A1,ATP5B,ATP5J,ATP6V1A,COX5A,COX5B,COX7A1,MT-CO2
GO:0046951	ketone body biosynthetic process	3	9	0.0037	ENSP00000265838,ENSP00000363614,ENSP00000449535	ACAT1,ACSS3,HMGCL
GO:1904263	positive regulation of TORC1 signaling	3	9	0.0037	ENSP00000358423,ENSP00000369899,ENSP00000377954	LARS,RRAGA,RRAGD
GO:0006839	mitochondrial transport	10	223	0.004	ENSP00000258424,ENSP00000262030,ENSP00000264657,ENSP00000281456,ENSP00000285093,ENSP00000381736,ENSP00000385828,ENSP00000389649,ENSP00000423673,ENSP00000457733	ACAA2,ATP5A1,ATP5B,ATP5J,COX5B,NDUFA13,SLC25A24,SLC25A4,STAT3,TST
GO:0022607	cellular component assembly	45	2343	0.004	ENSP00000001008,ENSP00000171887,ENSP00000215565,ENSP00000220764,ENSP00000245539,ENSP00000254950,ENSP00000259037,ENSP00000262878,ENSP00000265594,ENSP00000265838,ENSP00000266544,ENSP00000301457,ENSP00000312618,ENSP00000314649,ENSP00000315774,ENSP00000320171,ENSP00000322450,ENSP00000326699,ENSP00000332887,ENSP00000343657,ENSP00000345259,ENSP00000345771,ENSP00000353785,ENSP00000355890,ENSP00000356042…	AASS,ACAD9,ACAT1,ALDH5A1,ALDOA,CLGN,DECR1,EPB41,EPRS,EZR,FKBP4,HMGCL,LDB3,MCCC1,MCCC2,MRPS7,MYBPC3,MYH6,MYLK3,NDUFA13,NDUFA5,NDUFA7,NDUFA8,NDUFA9,NDUFB5,NDUFB6,NDUFB7,NDUFS1,NDUFS2,NDUFS5,NDUFS8,NDUFV1,PFKM,PKM,RABGGTA,RPL6,SAMHD1,SERPINA1,SLC9A3R2,STXBP3,TNS1,TPPP,UQCC3,UQCR10,VPS4A
GO:0006412	translation	13	362	0.0043	ENSP00000199706,ENSP00000245539,ENSP00000254630,ENSP00000263629,ENSP00000296456,ENSP00000301457,ENSP00000313007,ENSP00000347495,ENSP00000355890,ENSP00000377954,ENSP00000403172,ENSP00000448035,ENSP00000472847	APEH,EPRS,LARS,MRPL28,MRPS7,MTIF2,NACA,NDUFA7,PABPC1,PTCD3,RPL6,SARS2,WARS
GO:0046459	short-chain fatty acid metabolic process	3	10	0.0046	ENSP00000253382,ENSP00000314649,ENSP00000316924	ACSS1,ACSS2,ALDH5A1
GO:0006084	acetyl-CoA metabolic process	4	27	0.0048	ENSP00000253382,ENSP00000265838,ENSP00000316924,ENSP00000377040	AASS,ACAT1,ACSS1,ACSS2
GO:0009719	response to endogenous stimulus	30	1353	0.0049	ENSP00000001008,ENSP00000005178,ENSP00000216185,ENSP00000241337,ENSP00000264657,ENSP00000265838,ENSP00000270142,ENSP00000273398,ENSP00000291700,ENSP00000301149,ENSP00000320171,ENSP00000345672,ENSP00000351957,ENSP00000355890,ENSP00000356042,ENSP00000358423,ENSP00000359025,ENSP00000359539,ENSP00000362817,ENSP00000367309,ENSP00000369899,ENSP00000370023,ENSP00000377954,ENSP00000380489,ENSP00000386041…	ACAT1,ACSL1,ATP6V1A,CTSB,EPM2AIP1,EPRS,EZR,FABP3,FGF12,FHL2,FKBP4,GOT1,GPD1,GSTM2,HADHA,IDH1,LARS,MAOB,MB,MYH6,PDE3A,PDK4,PKM,RRAGA,RRAGD,S100B,SOD1,STAT3,STXBP3,TXN2
GO:0019216	regulation of lipid metabolic process	13	373	0.0054	ENSP00000005178,ENSP00000261893,ENSP00000270142,ENSP00000297258,ENSP00000308541,ENSP00000362817,ENSP00000376793,ENSP00000380837,ENSP00000386665,ENSP00000390265,ENSP00000422607,ENSP00000430269,ENSP00000438689	ACADVL,ACSL1,EPHX2,F2,FABP3,FABP5,FHL2,GIG25,IDH1,LACTB,LSS,PDK4,SOD1
GO:0060047	heart contraction	6	81	0.0054	ENSP00000270142,ENSP00000282541,ENSP00000386041,ENSP00000403902,ENSP00000413496,ENSP00000442795	FGF12,GPD1L,MYBPC3,MYH6,PPP1R13L,SOD1
GO:0042178	xenobiotic catabolic process	3	11	0.0057	ENSP00000241337,ENSP00000311469,ENSP00000422607	ACSL1,GSTM1,GSTM2
GO:0044539	long-chain fatty acid import into cell	3	11	0.0057	ENSP00000355890,ENSP00000362817,ENSP00000422607	ACSL1,EPRS,FABP3
GO:1990542	mitochondrial transmembrane transport	6	83	0.006	ENSP00000258424,ENSP00000262030,ENSP00000381736,ENSP00000385828,ENSP00000389649,ENSP00000423673	ATP5A1,ATP5B,ATP5J,COX5B,NDUFA13,TST
GO:0062012	regulation of small molecule metabolic process	12	332	0.0064	ENSP00000005178,ENSP00000264657,ENSP00000270142,ENSP00000297258,ENSP00000297283,ENSP00000301149,ENSP00000354876,ENSP00000362817,ENSP00000380837,ENSP00000406027,ENSP00000430269,ENSP00000438689	ACADVL,EPHX2,EPM2AIP1,FABP3,FABP5,GPD1,LSS,MT-CO2,PDK4,PGAM2,SOD1,STAT3
GO:0006066	alcohol metabolic process	11	285	0.0065	ENSP00000253382,ENSP00000261733,ENSP00000285093,ENSP00000297785,ENSP00000301149,ENSP00000306606,ENSP00000308610,ENSP00000316924,ENSP00000338352,ENSP00000359539,ENSP00000380837	ACAA2,ACSS1,ACSS2,ADH1B,ALDH1A1,ALDH2,GOT1,GPD1,GPD2,LSS,NUDT4
GO:0006996	organelle organization	55	3131	0.0065	ENSP00000215565,ENSP00000221418,ENSP00000231887,ENSP00000245539,ENSP00000254950,ENSP00000259037,ENSP00000262030,ENSP00000263277,ENSP00000263629,ENSP00000264657,ENSP00000266544,ENSP00000270142,ENSP00000281456,ENSP00000285093,ENSP00000299427,ENSP00000301457,ENSP00000312618,ENSP00000315013,ENSP00000315774,ENSP00000322450,ENSP00000332887,ENSP00000334314,ENSP00000338481,ENSP00000345259,ENSP00000353785…	ACAA2,ACAD9,ALDOA,ATP2A2,ATP5A1,ATP5B,ATP5J,CRAT,ECH1,EHD2,EHHADH,EML1,EPB41,EPB41L2,EPHX2,EZR,GPS1,HMGCL,HSD17B4,IDH1,LDB3,MFN1,MRPS7,MTIF2,MYBPC3,MYH6,MYLK3,NDUFA13,NDUFA5,NDUFA7,NDUFA8,NDUFA9,NDUFB5,NDUFB6,NDUFB7,NDUFS1,NDUFS2,NDUFS5,NDUFS8,NDUFV1,OPTN,PALLD,RPL6,SERPINA1,SLC25A4,SOD1,SSBP1,STAT3,SUN1,TACC2,TPP1,TPPP,UQCC3,UQCR10,VPS4A
GO:1902224	ketone body metabolic process	3	12	0.0068	ENSP00000265838,ENSP00000363614,ENSP00000449535	ACAT1,ACSS3,HMGCL
GO:0009154	purine ribonucleotide catabolic process	4	31	0.0073	ENSP00000265838,ENSP00000304229,ENSP00000338352,ENSP00000351957	ACAT1,HINT1,NUDT4,PDE3A
GO:0042407	cristae formation	4	31	0.0073	ENSP00000262030,ENSP00000381736,ENSP00000389649,ENSP00000432692	ATP5A1,ATP5B,ATP5J,UQCC3
GO:0042743	hydrogen peroxide metabolic process	4	31	0.0073	ENSP00000265462,ENSP00000270142,ENSP00000342026,ENSP00000367309	MAOB,PRDX5,PRDX6,SOD1
GO:0034622	cellular protein-containing complex assembly	21	832	0.0075	ENSP00000001008,ENSP00000215565,ENSP00000245539,ENSP00000259037,ENSP00000266544,ENSP00000301457,ENSP00000312618,ENSP00000315774,ENSP00000322450,ENSP00000332887,ENSP00000353785,ENSP00000356972,ENSP00000362060,ENSP00000362873,ENSP00000369176,ENSP00000392709,ENSP00000403172,ENSP00000417142,ENSP00000423673,ENSP00000432692,ENSP00000442795	ACAD9,FKBP4,MRPS7,MYBPC3,NDUFA13,NDUFA5,NDUFA7,NDUFA8,NDUFA9,NDUFB5,NDUFB6,NDUFB7,NDUFS1,NDUFS2,NDUFS5,NDUFS8,NDUFV1,RPL6,TPPP,UQCC3,UQCR10
GO:0006085	acetyl-CoA biosynthetic process	3	13	0.0081	ENSP00000253382,ENSP00000265838,ENSP00000316924	ACAT1,ACSS1,ACSS2
GO:0001775	cell activation	24	1024	0.0084	ENSP00000226253,ENSP00000228740,ENSP00000236671,ENSP00000259396,ENSP00000264657,ENSP00000273550,ENSP00000296456,ENSP00000297258,ENSP00000302621,ENSP00000308541,ENSP00000320171,ENSP00000342026,ENSP00000345672,ENSP00000348170,ENSP00000359025,ENSP00000371152,ENSP00000376793,ENSP00000378669,ENSP00000384906,ENSP00000390265,ENSP00000394936,ENSP00000401508,ENSP00000405573,ENSP00000416066	ALDOA,ALDOC,APEH,ASAH1,CTSB,CTSD,F2,FABP5,FTH1,GIG25,GPI,HP,IDH1,LRG1,LTA4H,NAPRT,ORM1,ORM2,PKM,PRDX6,SAA1,SERPINA1,STAT3,STXBP3
GO:0006097	glyoxylate cycle	2	2	0.0085	ENSP00000331897,ENSP00000390265	IDH1,IDH2
GO:0006127	glycerophosphate shuttle	2	2	0.0085	ENSP00000301149,ENSP00000308610	GPD1,GPD2
GO:0019285	glycine betaine biosynthetic process from choline	2	2	0.0085	ENSP00000319851,ENSP00000387123	ALDH7A1,CHDH
GO:0019413	acetate biosynthetic process	2	2	0.0085	ENSP00000253382,ENSP00000316924	ACSS1,ACSS2
GO:0019427	acetyl-CoA biosynthetic process from acetate	2	2	0.0085	ENSP00000253382,ENSP00000316924	ACSS1,ACSS2
GO:0019542	propionate biosynthetic process	2	2	0.0085	ENSP00000253382,ENSP00000316924	ACSS1,ACSS2
GO:0031455	glycine betaine metabolic process	2	2	0.0085	ENSP00000319851,ENSP00000387123	ALDH7A1,CHDH
GO:0046168	glycerol-3-phosphate catabolic process	2	2	0.0085	ENSP00000282541,ENSP00000301149	GPD1,GPD1L
GO:1990748	cellular detoxification	6	90	0.0085	ENSP00000241337,ENSP00000265462,ENSP00000270142,ENSP00000311469,ENSP00000342026,ENSP00000348170	GSTM1,GSTM2,HP,PRDX5,PRDX6,SOD1
GO:0065008	regulation of biological quality	60	3559	0.0089	ENSP00000005178,ENSP00000216185,ENSP00000241337,ENSP00000250378,ENSP00000255030,ENSP00000262030,ENSP00000263277,ENSP00000264613,ENSP00000264657,ENSP00000265462,ENSP00000270142,ENSP00000273398,ENSP00000273550,ENSP00000278407,ENSP00000281456,ENSP00000282541,ENSP00000285093,ENSP00000291700,ENSP00000296046,ENSP00000297258,ENSP00000297785,ENSP00000299198,ENSP00000299427,ENSP00000308541,ENSP00000313007…	ACAA2,ACADVL,ALDH1A1,ALDH5A1,ALDH7A1,ALDH9A1,ALDOA,ATP2A2,ATP5B,ATP6V1A,BCO2,CHDH,CKB,CMA1,CP,CPA3,CRP,EHD2,EPB41,EPHX2,EZR,F2,FABP3,FABP5,FGF12,FTH1,GIG25,GOT1,GPD1L,GPI,GSTM2,HSD17B4,LARS,LSS,MAOB,MB,MT-CO2,MYH6,MYLK3,NDUFS1,NHLRC2,PABPC1,PDE3A,PDK4,PFKM,PPP1R13L,PRDX5,PRDX6,S100B,SAA1,SERPINA1,SERPINF2,SERPING1,SLC25A4,SOD1,STAT3,STXBP3,SUN1,TPP1,TXN2
GO:2000377	regulation of reactive oxygen species metabolic process	8	169	0.0097	ENSP00000246957,ENSP00000255030,ENSP00000264657,ENSP00000270142,ENSP00000308541,ENSP00000348170,ENSP00000350314,ENSP00000354876	BCO2,CRP,F2,HP,MT-CO2,SOD1,STAT3,TRAP1
GO:0032868	response to insulin	9	213	0.0101	ENSP00000005178,ENSP00000273398,ENSP00000320171,ENSP00000355890,ENSP00000359025,ENSP00000359539,ENSP00000362817,ENSP00000370023,ENSP00000406027	ATP6V1A,EPM2AIP1,EPRS,FABP3,GOT1,HADHA,PDK4,PKM,STXBP3
GO:0032965	regulation of collagen biosynthetic process	4	35	0.0101	ENSP00000265462,ENSP00000308541,ENSP00000321853,ENSP00000359539	F2,GOT1,PRDX5,SERPINF2
GO:0044272	sulfur compound biosynthetic process	8	172	0.0107	ENSP00000241337,ENSP00000253382,ENSP00000265838,ENSP00000311469,ENSP00000316924,ENSP00000325548,ENSP00000422607,ENSP00000480476	ACAT1,ACSL1,ACSS1,ACSS2,CNDP2,GSTM1,GSTM2,OPLAH
GO:0006000	fructose metabolic process	3	15	0.0108	ENSP00000226253,ENSP00000297785,ENSP00000378669	ALDH1A1,ALDOA,ALDOC
GO:0006123	mitochondrial electron transport, cytochrome c to oxygen	3	15	0.0108	ENSP00000258424,ENSP00000317780,ENSP00000354876	COX5A,COX5B,MT-CO2
GO:0033540	fatty acid beta-oxidation using acyl-CoA oxidase	3	15	0.0108	ENSP00000231887,ENSP00000315013,ENSP00000420914	CRAT,EHHADH,HSD17B4
GO:0044085	cellular component biogenesis	46	2556	0.0112	ENSP00000001008,ENSP00000171887,ENSP00000215565,ENSP00000220764,ENSP00000245539,ENSP00000254950,ENSP00000259037,ENSP00000262878,ENSP00000265594,ENSP00000265838,ENSP00000266544,ENSP00000301457,ENSP00000312618,ENSP00000314649,ENSP00000315774,ENSP00000318318,ENSP00000320171,ENSP00000322450,ENSP00000326699,ENSP00000332887,ENSP00000343657,ENSP00000345259,ENSP00000345771,ENSP00000353785,ENSP00000355890…	AASS,ACAD9,ACAT1,ALDH5A1,ALDOA,CLGN,DECR1,EPB41,EPRS,EZR,FKBP4,HMGCL,LDB3,MCCC1,MCCC2,MPI,MRPS7,MYBPC3,MYH6,MYLK3,NDUFA13,NDUFA5,NDUFA7,NDUFA8,NDUFA9,NDUFB5,NDUFB6,NDUFB7,NDUFS1,NDUFS2,NDUFS5,NDUFS8,NDUFV1,PFKM,PKM,RABGGTA,RPL6,SAMHD1,SERPINA1,SLC9A3R2,STXBP3,TNS1,TPPP,UQCC3,UQCR10,VPS4A
GO:0006116	NADH oxidation	2	3	0.0129	ENSP00000301149,ENSP00000308610	GPD1,GPD2
GO:0019541	propionate metabolic process	2	3	0.0129	ENSP00000253382,ENSP00000316924	ACSS1,ACSS2
GO:0045214	sarcomere organization	4	38	0.0129	ENSP00000378288,ENSP00000386041,ENSP00000401437,ENSP00000442795	LDB3,MYBPC3,MYH6,MYLK3
GO:0070458	cellular detoxification of nitrogen compound	2	3	0.0129	ENSP00000241337,ENSP00000311469	GSTM1,GSTM2
GO:0009058	biosynthetic process	74	4714	0.0131	ENSP00000199706,ENSP00000221476,ENSP00000222553,ENSP00000226253,ENSP00000228740,ENSP00000236959,ENSP00000241337,ENSP00000245539,ENSP00000250378,ENSP00000253382,ENSP00000254630,ENSP00000258424,ENSP00000262030,ENSP00000262878,ENSP00000263629,ENSP00000264657,ENSP00000265838,ENSP00000266544,ENSP00000270142,ENSP00000282541,ENSP00000285093,ENSP00000296456,ENSP00000297258,ENSP00000297283,ENSP00000301149…	AASS,ACAA2,ACAT1,ACSL1,ACSS1,ACSS2,ACSS3,ADCK3,ADSSL1,ALDH7A1,ALDH9A1,ALDOA,ALDOC,APEH,ATIC,ATP5A1,ATP5B,ATP5J,CHDH,CKM,CMA1,CNDP2,COX5B,EPHX2,EPRS,FABP5,FHL2,GAMT,GOT1,GPD1,GPD1L,GPD2,GPI,GPT,GSTM1,GSTM2,HINT1,HMGCL,HSD17B4,IDH2,KLHL31,LARS,LDHA,LSS,LTA4H,MAOB,MPI,MRPL28,MRPS7,MTIF2,NACA,NAMPT,NAPRT,NDUFA7,NDUFA9,NUDT4,OPLAH,PABPC1,PDE3A,PERM1,PFKM,PGAM2,PKM,PPP1R13L,PTCD3,RPL6,SAMHD1,SARS2,SOD1…
GO:0097164	ammonium ion metabolic process	8	179	0.0131	ENSP00000269298,ENSP00000297258,ENSP00000315013,ENSP00000319851,ENSP00000346827,ENSP00000367309,ENSP00000387123,ENSP00000439012	ALDH7A1,ALDH9A1,CHDH,CRAT,DBI,FABP5,MAOB,SAT2
GO:0006605	protein targeting	11	318	0.0132	ENSP00000221418,ENSP00000231887,ENSP00000254950,ENSP00000315013,ENSP00000363614,ENSP00000377954,ENSP00000390265,ENSP00000403172,ENSP00000420914,ENSP00000423673,ENSP00000430269	CRAT,ECH1,EHHADH,EPHX2,HMGCL,HSD17B4,IDH1,LARS,NDUFA13,RPL6,VPS4A
GO:0010712	regulation of collagen metabolic process	4	39	0.0139	ENSP00000265462,ENSP00000308541,ENSP00000321853,ENSP00000359539	F2,GOT1,PRDX5,SERPINF2
GO:0010310	regulation of hydrogen peroxide metabolic process	3	17	0.0141	ENSP00000264657,ENSP00000348170,ENSP00000354876	HP,MT-CO2,STAT3
GO:0001676	long-chain fatty acid metabolic process	6	104	0.0155	ENSP00000228740,ENSP00000241337,ENSP00000312618,ENSP00000420914,ENSP00000422607,ENSP00000430269	ACAD9,ACSL1,EPHX2,GSTM2,HSD17B4,LTA4H
GO:0006103	2-oxoglutarate metabolic process	3	18	0.0161	ENSP00000331897,ENSP00000359539,ENSP00000390265	GOT1,IDH1,IDH2
GO:0046716	muscle cell cellular homeostasis	3	18	0.0161	ENSP00000270142,ENSP00000345771,ENSP00000378669	ALDOA,PFKM,SOD1
GO:0051179	localization	80	5233	0.0161	ENSP00000001008,ENSP00000171887,ENSP00000221418,ENSP00000223642,ENSP00000226253,ENSP00000228740,ENSP00000231887,ENSP00000236671,ENSP00000254950,ENSP00000255030,ENSP00000258424,ENSP00000259396,ENSP00000261187,ENSP00000262030,ENSP00000262776,ENSP00000263277,ENSP00000264613,ENSP00000264657,ENSP00000266041,ENSP00000266544,ENSP00000270142,ENSP00000273398,ENSP00000273550,ENSP00000278222,ENSP00000278407…	ACAA2,ACSL1,ALDOA,ALDOC,APEH,ASAH1,ATP2A2,ATP5A1,ATP5B,ATP5J,ATP6V1A,C5,CA4,COX5A,COX5B,COX7A1,CP,CRAT,CRP,CTSB,CTSD,ECH1,EHD2,EHHADH,EPHX2,EPRS,EZR,F2,FABP3,FABP5,FKBP4,FTH1,GC,GIG25,GPI,HMGCL,HP,HSD17B4,IDH1,ITIH4,LARS,LGALS3BP,LRG1,LTA4H,MAPKAPK3,MB,MFN1,MT-CO2,NACA,NAPRT,NDUFA13,NDUFA9,NHLRC2,NOSTRIN,OPTN,ORM1,ORM2,PALLD,PKM,PRDX6,RPL6,RRAGA,RRAGD,SAA1,SAA2,SAA4,SELENBP1,SERPINA1,SERPINF2,SER…
GO:0071417	cellular response to organonitrogen compound	14	485	0.0161	ENSP00000005178,ENSP00000241337,ENSP00000264657,ENSP00000270142,ENSP00000273398,ENSP00000301149,ENSP00000320171,ENSP00000351957,ENSP00000355890,ENSP00000356042,ENSP00000358423,ENSP00000359539,ENSP00000369899,ENSP00000377954	ATP6V1A,EPRS,EZR,GOT1,GPD1,GSTM2,LARS,PDE3A,PDK4,PKM,RRAGA,RRAGD,SOD1,STAT3
GO:0071616	acyl-CoA biosynthetic process	4	41	0.0161	ENSP00000253382,ENSP00000265838,ENSP00000316924,ENSP00000422607	ACAT1,ACSL1,ACSS1,ACSS2
GO:0042592	homeostatic process	30	1491	0.0178	ENSP00000005178,ENSP00000216185,ENSP00000241337,ENSP00000250378,ENSP00000262030,ENSP00000264613,ENSP00000264657,ENSP00000265462,ENSP00000270142,ENSP00000273398,ENSP00000273550,ENSP00000282541,ENSP00000297258,ENSP00000299198,ENSP00000299427,ENSP00000308541,ENSP00000342026,ENSP00000345771,ENSP00000358307,ENSP00000359539,ENSP00000362817,ENSP00000376793,ENSP00000378669,ENSP00000380489,ENSP00000384906…	ACADVL,ALDOA,ATP2A2,ATP5B,ATP6V1A,CKB,CMA1,CP,EPHX2,F2,FABP3,FABP5,FGF12,FTH1,GIG25,GOT1,GPD1L,GSTM2,MB,NHLRC2,PDK4,PFKM,PPP1R13L,PRDX5,PRDX6,SAA1,SOD1,STAT3,TPP1,TXN2
GO:0006955	immune response	31	1560	0.018	ENSP00000223642,ENSP00000226253,ENSP00000228740,ENSP00000236671,ENSP00000259396,ENSP00000262878,ENSP00000263413,ENSP00000264657,ENSP00000273550,ENSP00000278407,ENSP00000291700,ENSP00000296456,ENSP00000297258,ENSP00000302621,ENSP00000308541,ENSP00000320171,ENSP00000342026,ENSP00000345672,ENSP00000348170,ENSP00000355890,ENSP00000359025,ENSP00000368022,ENSP00000371152,ENSP00000376793,ENSP00000378669…	ALDOA,ALDOC,APEH,ASAH1,C5,C6,CTSB,CTSD,EPRS,F2,FABP5,FTH1,GIG25,GPI,HP,IDH1,LRG1,LTA4H,NAPRT,OPTN,ORM1,ORM2,PKM,PRDX6,S100B,SAA1,SAMHD1,SERPINA1,SERPING1,STAT3,STXBP3
GO:0006121	mitochondrial electron transport, succinate to ubiquinone	2	4	0.0181	ENSP00000264932,ENSP00000356953	SDHA,SDHC
GO:0018916	nitrobenzene metabolic process	2	4	0.0181	ENSP00000241337,ENSP00000311469	GSTM1,GSTM2
GO:0030029	actin filament-based process	14	493	0.0181	ENSP00000254950,ENSP00000255381,ENSP00000263277,ENSP00000282541,ENSP00000338481,ENSP00000345259,ENSP00000356042,ENSP00000378288,ENSP00000378669,ENSP00000386041,ENSP00000401437,ENSP00000413496,ENSP00000425556,ENSP00000442795	ALDOA,EHD2,EPB41,EPB41L2,EZR,FGF12,GPD1L,LDB3,MYBPC3,MYH4,MYH6,MYLK3,PALLD,VPS4A
GO:0060048	cardiac muscle contraction	5	73	0.0181	ENSP00000282541,ENSP00000386041,ENSP00000403902,ENSP00000413496,ENSP00000442795	FGF12,GPD1L,MYBPC3,MYH6,PPP1R13L
GO:1901568	fatty acid derivative metabolic process	7	148	0.0181	ENSP00000228740,ENSP00000265838,ENSP00000363614,ENSP00000420914,ENSP00000422607,ENSP00000430269,ENSP00000449535	ACAT1,ACSL1,ACSS3,EPHX2,HMGCL,HSD17B4,LTA4H
GO:1901700	response to oxygen-containing compound	29	1427	0.0181	ENSP00000005178,ENSP00000216185,ENSP00000250378,ENSP00000264657,ENSP00000265462,ENSP00000270142,ENSP00000273398,ENSP00000301149,ENSP00000320171,ENSP00000348170,ENSP00000351957,ENSP00000355890,ENSP00000356042,ENSP00000358423,ENSP00000359025,ENSP00000359539,ENSP00000362817,ENSP00000363614,ENSP00000367309,ENSP00000369899,ENSP00000370023,ENSP00000377954,ENSP00000380489,ENSP00000396467,ENSP00000406027…	ACSL1,ATP2A2,ATP6V1A,CMA1,EPM2AIP1,EPRS,EZR,FABP3,GOT1,GPD1,HADHA,HMGCL,HP,LARS,LDHA,MAOB,MAPKAPK3,MB,NDUFA13,PDE3A,PDK4,PKM,PRDX5,RRAGA,RRAGD,SOD1,STAT3,STXBP3,TXN2
GO:0009725	response to hormone	20	854	0.02	ENSP00000001008,ENSP00000005178,ENSP00000216185,ENSP00000264657,ENSP00000265838,ENSP00000273398,ENSP00000291700,ENSP00000320171,ENSP00000345672,ENSP00000355890,ENSP00000359025,ENSP00000359539,ENSP00000362817,ENSP00000367309,ENSP00000370023,ENSP00000380489,ENSP00000386665,ENSP00000390265,ENSP00000406027,ENSP00000422607	ACAT1,ACSL1,ATP6V1A,CTSB,EPM2AIP1,EPRS,FABP3,FHL2,FKBP4,GOT1,HADHA,IDH1,MAOB,MB,PDK4,PKM,S100B,STAT3,STXBP3,TXN2
GO:0090075	relaxation of muscle	3	20	0.0202	ENSP00000241337,ENSP00000270142,ENSP00000440045	ATP2A2,GSTM2,SOD1
GO:0052548	regulation of endopeptidase activity	12	393	0.0208	ENSP00000223642,ENSP00000264657,ENSP00000265462,ENSP00000266041,ENSP00000278407,ENSP00000305731,ENSP00000321853,ENSP00000372155,ENSP00000376793,ENSP00000382356,ENSP00000416066,ENSP00000423673	C5,COL28A1,CST1,GIG25,ITIH4,NDUFA13,PRDX5,PSME1,SERPINA1,SERPINF2,SERPING1,STAT3
GO:0010951	negative regulation of endopeptidase activity	9	242	0.0209	ENSP00000223642,ENSP00000265462,ENSP00000266041,ENSP00000278407,ENSP00000305731,ENSP00000321853,ENSP00000376793,ENSP00000382356,ENSP00000416066	C5,COL28A1,CST1,GIG25,ITIH4,PRDX5,SERPINA1,SERPINF2,SERPING1
GO:0042737	drug catabolic process	6	113	0.0216	ENSP00000261733,ENSP00000265462,ENSP00000265838,ENSP00000342026,ENSP00000367309,ENSP00000377040	AASS,ACAT1,ALDH2,MAOB,PRDX5,PRDX6
GO:0072594	establishment of protein localization to organelle	12	396	0.0218	ENSP00000221418,ENSP00000231887,ENSP00000254950,ENSP00000264657,ENSP00000315013,ENSP00000363614,ENSP00000377954,ENSP00000390265,ENSP00000403172,ENSP00000420914,ENSP00000423673,ENSP00000430269	CRAT,ECH1,EHHADH,EPHX2,HMGCL,HSD17B4,IDH1,LARS,NDUFA13,RPL6,STAT3,VPS4A
GO:1901576	organic substance biosynthetic process	72	4656	0.0218	ENSP00000199706,ENSP00000221476,ENSP00000222553,ENSP00000226253,ENSP00000228740,ENSP00000236959,ENSP00000241337,ENSP00000245539,ENSP00000250378,ENSP00000253382,ENSP00000254630,ENSP00000258424,ENSP00000262030,ENSP00000262878,ENSP00000263629,ENSP00000264657,ENSP00000265838,ENSP00000266544,ENSP00000282541,ENSP00000285093,ENSP00000296456,ENSP00000297258,ENSP00000297283,ENSP00000301149,ENSP00000301457…	AASS,ACAA2,ACAT1,ACSL1,ACSS1,ACSS2,ACSS3,ADCK3,ADSSL1,ALDH7A1,ALDH9A1,ALDOA,ALDOC,APEH,ATIC,ATP5A1,ATP5B,ATP5J,CHDH,CKM,CMA1,CNDP2,COX5B,EPHX2,EPRS,FABP5,FHL2,GAMT,GOT1,GPD1,GPD1L,GPD2,GPI,GPT,GSTM1,GSTM2,HINT1,HMGCL,HSD17B4,IDH2,KLHL31,LARS,LDHA,LSS,LTA4H,MPI,MRPL28,MRPS7,MTIF2,NACA,NAMPT,NAPRT,NDUFA7,NDUFA9,NUDT4,OPLAH,PABPC1,PDE3A,PERM1,PFKM,PGAM2,PKM,PPP1R13L,PTCD3,RPL6,SAMHD1,SARS2,SSBP1,STA…
GO:0009068	aspartate family amino acid catabolic process	3	21	0.0225	ENSP00000359539,ENSP00000377040,ENSP00000387123	AASS,ALDH7A1,GOT1
GO:0042730	fibrinolysis	3	21	0.0225	ENSP00000278407,ENSP00000308541,ENSP00000321853	F2,SERPINF2,SERPING1
GO:0051289	protein homotetramerization	5	78	0.0229	ENSP00000220764,ENSP00000262878,ENSP00000314649,ENSP00000320171,ENSP00000378669	ALDH5A1,ALDOA,DECR1,PKM,SAMHD1
GO:0019725	cellular homeostasis	19	806	0.0233	ENSP00000216185,ENSP00000241337,ENSP00000250378,ENSP00000262030,ENSP00000264613,ENSP00000265462,ENSP00000270142,ENSP00000273398,ENSP00000273550,ENSP00000299198,ENSP00000308541,ENSP00000342026,ENSP00000345771,ENSP00000358307,ENSP00000359539,ENSP00000378669,ENSP00000384906,ENSP00000430269,ENSP00000440045	ALDOA,ATP2A2,ATP5B,ATP6V1A,CKB,CMA1,CP,EPHX2,F2,FTH1,GOT1,GSTM2,NHLRC2,PFKM,PRDX5,PRDX6,SAA1,SOD1,TXN2
GO:0006102	isocitrate metabolic process	2	5	0.0238	ENSP00000331897,ENSP00000390265	IDH1,IDH2
GO:0006104	succinyl-CoA metabolic process	2	5	0.0238	ENSP00000367923,ENSP00000419325	SUCLA2,SUCLG2
GO:0051262	protein tetramerization	7	157	0.0238	ENSP00000220764,ENSP00000262878,ENSP00000314649,ENSP00000320171,ENSP00000363614,ENSP00000377040,ENSP00000378669	AASS,ALDH5A1,ALDOA,DECR1,HMGCL,PKM,SAMHD1
GO:1904778	positive regulation of protein localization to cell cortex	2	5	0.0238	ENSP00000338481,ENSP00000345259	EPB41,EPB41L2
GO:0016043	cellular component organization	78	5163	0.0243	ENSP00000001008,ENSP00000171887,ENSP00000199706,ENSP00000215565,ENSP00000220764,ENSP00000221418,ENSP00000231887,ENSP00000245539,ENSP00000250378,ENSP00000254630,ENSP00000254950,ENSP00000259037,ENSP00000262030,ENSP00000262878,ENSP00000263277,ENSP00000263629,ENSP00000264657,ENSP00000265594,ENSP00000265838,ENSP00000266544,ENSP00000270142,ENSP00000281456,ENSP00000285093,ENSP00000291700,ENSP00000296456…	AASS,ACAA2,ACAD9,ACAT1,ALDH5A1,ALDOA,APEH,ATP2A2,ATP5A1,ATP5B,ATP5J,CLGN,CMA1,CRAT,DECR1,ECH1,EHD2,EHHADH,EML1,EPB41,EPB41L2,EPHX2,EPRS,EZR,FKBP4,GPS1,HMGCL,HSD17B4,IDH1,LARS,LDB3,MCCC1,MCCC2,MFN1,MRPL28,MRPS7,MTIF2,MYBPC3,MYH6,MYLK3,NDUFA13,NDUFA5,NDUFA7,NDUFA8,NDUFA9,NDUFB5,NDUFB6,NDUFB7,NDUFS1,NDUFS2,NDUFS5,NDUFS8,NDUFV1,OPTN,PALLD,PFKM,PKM,PTCD3,RABGGTA,RPL6,S100B,SAMHD1,SERPINA1,SERPINF2,SLC…
GO:0003081	regulation of systemic arterial blood pressure by renin-angiotensin	3	22	0.0245	ENSP00000250378,ENSP00000296046,ENSP00000321853	CMA1,CPA3,SERPINF2
GO:0006766	vitamin metabolic process	6	117	0.0245	ENSP00000265594,ENSP00000274813,ENSP00000343657,ENSP00000365462,ENSP00000419027,ENSP00000421725	GC,MCCC1,MCCC2,MUT,PCCA,PCCB
GO:0006418	tRNA aminoacylation for protein translation	4	48	0.025	ENSP00000347495,ENSP00000355890,ENSP00000377954,ENSP00000472847	EPRS,LARS,SARS2,WARS
GO:0006767	water-soluble vitamin metabolic process	5	81	0.0257	ENSP00000265594,ENSP00000274813,ENSP00000343657,ENSP00000365462,ENSP00000419027	MCCC1,MCCC2,MUT,PCCA,PCCB
GO:0042402	cellular biogenic amine catabolic process	3	23	0.027	ENSP00000269298,ENSP00000319851,ENSP00000387123	ALDH7A1,CHDH,SAT2
GO:1901570	fatty acid derivative biosynthetic process	5	82	0.027	ENSP00000228740,ENSP00000265838,ENSP00000363614,ENSP00000422607,ENSP00000449535	ACAT1,ACSL1,ACSS3,HMGCL,LTA4H
GO:0070252	actin-mediated cell contraction	5	84	0.0295	ENSP00000255381,ENSP00000282541,ENSP00000386041,ENSP00000413496,ENSP00000442795	FGF12,GPD1L,MYBPC3,MYH4,MYH6
GO:0010728	regulation of hydrogen peroxide biosynthetic process	2	6	0.03	ENSP00000264657,ENSP00000354876	MT-CO2,STAT3
GO:0042426	choline catabolic process	2	6	0.03	ENSP00000319851,ENSP00000387123	ALDH7A1,CHDH
GO:0030449	regulation of complement activation	4	52	0.0318	ENSP00000223642,ENSP00000263413,ENSP00000278407,ENSP00000308541	C5,C6,F2,SERPING1
GO:0098869	cellular oxidant detoxification	5	86	0.0318	ENSP00000241337,ENSP00000265462,ENSP00000270142,ENSP00000342026,ENSP00000348170	GSTM2,HP,PRDX5,PRDX6,SOD1
GO:0042133	neurotransmitter metabolic process	5	87	0.0331	ENSP00000314649,ENSP00000319851,ENSP00000346827,ENSP00000367309,ENSP00000387123	ALDH5A1,ALDH7A1,ALDH9A1,CHDH,MAOB
GO:0006952	defense response	25	1234	0.0347	ENSP00000223642,ENSP00000255030,ENSP00000259396,ENSP00000262776,ENSP00000262878,ENSP00000263413,ENSP00000264657,ENSP00000265462,ENSP00000266041,ENSP00000278222,ENSP00000278407,ENSP00000291700,ENSP00000308541,ENSP00000321853,ENSP00000348170,ENSP00000355890,ENSP00000359025,ENSP00000368022,ENSP00000376793,ENSP00000378288,ENSP00000384906,ENSP00000394936,ENSP00000416066,ENSP00000430269,ENSP00000436126	C5,C6,CRP,EPHX2,EPRS,F2,GIG25,HP,ITIH4,LGALS3BP,MYLK3,OPTN,ORM1,ORM2,PRDX5,S100B,SAA1,SAA2,SAA4,SAMHD1,SERPINA1,SERPINF2,SERPING1,STAT3,STXBP3
GO:0010714	positive regulation of collagen metabolic process	3	26	0.0354	ENSP00000265462,ENSP00000308541,ENSP00000321853	F2,PRDX5,SERPINF2
GO:0032967	positive regulation of collagen biosynthetic process	3	26	0.0354	ENSP00000265462,ENSP00000308541,ENSP00000321853	F2,PRDX5,SERPINF2
GO:0044275	cellular carbohydrate catabolic process	3	26	0.0354	ENSP00000164139,ENSP00000308610,ENSP00000345771	GPD2,PFKM,PYGM
GO:0051196	regulation of coenzyme metabolic process	4	54	0.0354	ENSP00000005178,ENSP00000264657,ENSP00000297283,ENSP00000301149	GPD1,PDK4,PGAM2,STAT3
GO:0090181	regulation of cholesterol metabolic process	4	54	0.0354	ENSP00000270142,ENSP00000380837,ENSP00000430269,ENSP00000438689	ACADVL,EPHX2,LSS,SOD1
GO:2000257	regulation of protein activation cascade	4	54	0.0354	ENSP00000223642,ENSP00000263413,ENSP00000278407,ENSP00000308541	C5,C6,F2,SERPING1
GO:0030388	fructose 1,6-bisphosphate metabolic process	2	7	0.0366	ENSP00000226253,ENSP00000378669	ALDOA,ALDOC
GO:0071233	cellular response to leucine	2	7	0.0366	ENSP00000358423,ENSP00000377954	LARS,RRAGD
GO:0006140	regulation of nucleotide metabolic process	5	90	0.0368	ENSP00000005178,ENSP00000264657,ENSP00000297283,ENSP00000301149,ENSP00000354876	GPD1,MT-CO2,PDK4,PGAM2,STAT3
GO:0009066	aspartate family amino acid metabolic process	4	55	0.0368	ENSP00000333019,ENSP00000359539,ENSP00000377040,ENSP00000387123	AASS,ADSSL1,ALDH7A1,GOT1
GO:0070887	cellular response to chemical stimulus	45	2672	0.0368	ENSP00000001008,ENSP00000005178,ENSP00000223642,ENSP00000241337,ENSP00000250378,ENSP00000262878,ENSP00000264657,ENSP00000265462,ENSP00000270142,ENSP00000273398,ENSP00000278222,ENSP00000285093,ENSP00000291700,ENSP00000299427,ENSP00000301149,ENSP00000306163,ENSP00000311469,ENSP00000320171,ENSP00000320324,ENSP00000333019,ENSP00000342026,ENSP00000345672,ENSP00000348170,ENSP00000351957,ENSP00000355890…	ACAA2,ACADVL,ACSL1,ADSSL1,ANKRD2,ATP2A2,ATP6V1A,C5,CMA1,CTSB,EPHX2,EPRS,EZR,FGF12,FHL2,FKBP4,GOT1,GPD1,GSTM1,GSTM2,HP,LARS,MYH6,MYLK3,NDUFA13,NPEPPS,NUDT2,OPTN,PDE3A,PDK4,PKM,PRDX5,PRDX6,RRAGA,RRAGD,S100B,SAA1,SAA2,SAA4,SAMHD1,SLC25A24,SOD1,STAT3,STXBP3,TPP1
GO:0046890	regulation of lipid biosynthetic process	7	174	0.0372	ENSP00000005178,ENSP00000270142,ENSP00000297258,ENSP00000362817,ENSP00000380837,ENSP00000390265,ENSP00000438689	ACADVL,FABP3,FABP5,IDH1,LSS,PDK4,SOD1
GO:0071840	cellular component organization or biogenesis	79	5342	0.0372	ENSP00000001008,ENSP00000171887,ENSP00000199706,ENSP00000215565,ENSP00000220764,ENSP00000221418,ENSP00000231887,ENSP00000245539,ENSP00000250378,ENSP00000254630,ENSP00000254950,ENSP00000259037,ENSP00000262030,ENSP00000262878,ENSP00000263277,ENSP00000263629,ENSP00000264657,ENSP00000265594,ENSP00000265838,ENSP00000266544,ENSP00000270142,ENSP00000281456,ENSP00000285093,ENSP00000291700,ENSP00000296456…	AASS,ACAA2,ACAD9,ACAT1,ALDH5A1,ALDOA,APEH,ATP2A2,ATP5A1,ATP5B,ATP5J,CLGN,CMA1,CRAT,DECR1,ECH1,EHD2,EHHADH,EML1,EPB41,EPB41L2,EPHX2,EPRS,EZR,FKBP4,GPS1,HMGCL,HSD17B4,IDH1,LARS,LDB3,MCCC1,MCCC2,MFN1,MPI,MRPL28,MRPS7,MTIF2,MYBPC3,MYH6,MYLK3,NDUFA13,NDUFA5,NDUFA7,NDUFA8,NDUFA9,NDUFB5,NDUFB6,NDUFB7,NDUFS1,NDUFS2,NDUFS5,NDUFS8,NDUFV1,OPTN,PALLD,PFKM,PKM,PTCD3,RABGGTA,RPL6,S100B,SAMHD1,SERPINA1,SERPINF2…
GO:0042594	response to starvation	7	175	0.0379	ENSP00000005178,ENSP00000265838,ENSP00000333019,ENSP00000358423,ENSP00000363614,ENSP00000369899,ENSP00000377954	ACAT1,ADSSL1,HMGCL,LARS,PDK4,RRAGA,RRAGD
GO:0050716	positive regulation of interleukin-1 secretion	3	27	0.0379	ENSP00000259396,ENSP00000384906,ENSP00000394936	ORM1,ORM2,SAA1
GO:1901136	carbohydrate derivative catabolic process	7	175	0.0379	ENSP00000262878,ENSP00000265838,ENSP00000282541,ENSP00000301149,ENSP00000304229,ENSP00000338352,ENSP00000351957	ACAT1,GPD1,GPD1L,HINT1,NUDT4,PDE3A,SAMHD1
GO:2001171	positive regulation of ATP biosynthetic process	3	27	0.0379	ENSP00000264657,ENSP00000301149,ENSP00000354876	GPD1,MT-CO2,STAT3
GO:0046320	regulation of fatty acid oxidation	3	28	0.0409	ENSP00000005178,ENSP00000362817,ENSP00000438689	ACADVL,FABP3,PDK4
GO:0044249	cellular biosynthetic process	69	4567	0.043	ENSP00000199706,ENSP00000222553,ENSP00000226253,ENSP00000228740,ENSP00000236959,ENSP00000241337,ENSP00000245539,ENSP00000253382,ENSP00000254630,ENSP00000258424,ENSP00000262030,ENSP00000262878,ENSP00000263629,ENSP00000264657,ENSP00000265838,ENSP00000266544,ENSP00000270142,ENSP00000282541,ENSP00000296456,ENSP00000297258,ENSP00000297283,ENSP00000301149,ENSP00000301457,ENSP00000304229,ENSP00000311469…	AASS,ACAT1,ACSL1,ACSS1,ACSS2,ACSS3,ADCK3,ADSSL1,ALDH7A1,ALDH9A1,ALDOA,ALDOC,APEH,ATIC,ATP5A1,ATP5B,ATP5J,CHDH,CNDP2,COX5B,EPHX2,EPRS,FABP5,FHL2,GAMT,GOT1,GPD1,GPD1L,GPI,GPT,GSTM1,GSTM2,HINT1,HMGCL,HSD17B4,IDH2,KLHL31,LARS,LDHA,LTA4H,MAOB,MPI,MRPL28,MRPS7,MTIF2,NACA,NAMPT,NAPRT,NDUFA7,NDUFA9,NUDT4,OPLAH,PABPC1,PDE3A,PERM1,PFKM,PGAM2,PKM,PPP1R13L,PTCD3,RPL6,SAMHD1,SARS2,SOD1,SSBP1,STAT3,SUCLA2,UQCC…
GO:0010727	negative regulation of hydrogen peroxide metabolic process	2	8	0.0434	ENSP00000264657,ENSP00000348170	HP,STAT3
GO:0050665	hydrogen peroxide biosynthetic process	2	8	0.0434	ENSP00000270142,ENSP00000367309	MAOB,SOD1
GO:1990253	cellular response to leucine starvation	2	8	0.0434	ENSP00000358423,ENSP00000377954	LARS,RRAGD
GO:0055001	muscle cell development	6	137	0.045	ENSP00000378288,ENSP00000386041,ENSP00000386665,ENSP00000401437,ENSP00000440045,ENSP00000442795	ATP2A2,FHL2,LDB3,MYBPC3,MYH6,MYLK3
GO:0006739	NADP metabolic process	3	30	0.0477	ENSP00000265462,ENSP00000331897,ENSP00000390265	IDH1,IDH2,PRDX5
GO:0010243	response to organonitrogen compound	19	876	0.0477	ENSP00000005178,ENSP00000241337,ENSP00000264657,ENSP00000270142,ENSP00000273398,ENSP00000301149,ENSP00000320171,ENSP00000351957,ENSP00000355890,ENSP00000356042,ENSP00000358423,ENSP00000359025,ENSP00000359539,ENSP00000362817,ENSP00000369899,ENSP00000370023,ENSP00000377954,ENSP00000406027,ENSP00000445175	ATP6V1A,EPM2AIP1,EPRS,EZR,FABP3,GOT1,GPD1,GSTM2,HADHA,LARS,LDHA,PDE3A,PDK4,PKM,RRAGA,RRAGD,SOD1,STAT3,STXBP3
