# Supplementary material for: Multi-omics integration identifies key upstream regulators of pathomechanisms in hypertrophic cardiomyopathy due to truncating MYBPC3 mutations
Source: Clin Epigenetics. 2021 Mar 23;13:61. doi: 10.1186/s13148-021-01043-3 (PMC7989210; doi:10.1186/s13148-021-01043-3)
Supplement: Supplementary file 13 — Additional file 13: Table S5 (A) Unsupervised analysis (O2PLS) ranking DNA regions that contributed to the separation between HCM and control hearts. (B) Unsupervised analysis (O2PLS) ranking genes that contributed to the separation between HCM and control hearts [file 13148_2021_1043_MOESM13_ESM.xlsx]

## Sheet: Supplementary Table 5A
Region ID (H3K27ac ChIP-seq)	Weight
447	0.0164108
49847	0.015737
49849	0.0155548
49848	0.0151591
46556	0.0143344
32647	0.0142862
19797	0.0142652
37667	0.0141415
10181	0.0138807
49081	0.0137808
22489	0.01375
13833	0.0134575
13363	0.0132375
43896	0.0130897
24385	0.0130754
45658	0.0129694
2591	0.0127664
40836	0.0126702
24351	0.0125736
33453	0.012527
10759	0.0124863
43890	0.0124023
14956	0.012402
36627	0.0123418
26257	0.0123408
4410	0.0123068
32927	0.0122833
19946	0.012282
24380	0.0122271
34062	0.012108
12207	0.0120744
32454	0.0120495
5805	0.0120239
45203	0.0119865
19634	0.0119053
39957	0.0118784
29127	0.0118742
5650	0.0118659
26828	0.0117731
46555	0.0117555
8565	0.0117187
8441	0.0117023
445	0.0116648
35601	0.0116646
15339	0.0115828
34120	0.0115579
7668	0.0115533
35383	0.011483
32936	0.0114734
33290	0.0114716
14219	0.0114565
13740	0.0114402
2268	0.0114328
35409	0.0114239
13350	0.0114095
29122	0.011395
36182	0.0113852
48768	0.0113759
19304	0.0113708
4411	0.0113579
39769	0.0113413
26210	0.0113402
3400	0.0113397
29121	0.0113365
48370	0.0113221
22367	0.0113014
8562	0.011272
12635	0.0112687
24344	0.0112675
19326	0.0112291
23363	0.0112197
3740	0.0112139
446	0.011206
37416	0.0112036
21161	0.011197
28280	0.0111903
43790	0.0111833
15344	0.0111703
30485	0.0111642
23065	0.0111635
22325	0.0111573
37666	0.0111341
36181	0.0111141
18759	0.0110828
5878	0.0110684
33917	0.0110639
26507	0.0110615
14295	0.0110549
5877	0.0110406
29851	0.0110353
30661	0.0110344
10032	0.0110302
29051	0.0110255
4420	0.0110105
27228	0.0110012
2273	0.0109865
25304	0.0109593
23928	0.0109585
25109	0.0109538
35762	0.0109324
28241	0.0109316
4408	0.0109177
25604	0.0108984
23914	0.0108928
41982	0.0108769
39774	0.0108563
15006	0.0108512
9221	0.0108347
12197	0.0108305
7735	0.010829
22445	0.0108201
22651	0.0108163
2479	0.0108161
49956	0.0108142
20159	0.0107956
34043	0.010795
12476	0.0107931
28936	0.0107911
30487	0.010791
14530	0.0107735
5749	0.01074
23909	0.0107397
39474	0.0107288
24304	0.0106834
36051	0.010675
43892	0.0106601
20010	0.0106556
48833	0.0106404
10960	0.0106333
45062	0.0106293
18411	0.0106196
36059	0.0106094
8564	0.0106046
7582	0.0105955
6647	0.0105931
16929	0.010587
36604	0.0105755
14201	0.010549
23939	0.010549
37384	0.0105484
19565	0.0105414
24367	0.0105288
481	0.010526
16754	0.0105031
7953	0.0104946
19327	0.0104798
32480	0.0104766
4421	0.0104738
25560	0.0104694
26827	0.0104689
32177	0.0104342
19023	0.0104205
5780	0.0104152
41407	0.0104093
11027	0.0104068
20959	0.0103993
17071	0.01039
45380	0.0103852
30559	0.0103846
2903	0.0103775
18973	0.0103763
27353	0.0103744
26415	0.0103722
33283	0.0103705
38162	0.0103689
7320	0.0103675
9882	0.0103628
5427	0.0103617
41413	0.0103495
5429	0.0103491
44999	0.0103466
33956	0.0103429
37126	0.0103424
12250	0.0103402
9361	0.0103379
17919	0.0103364
46397	0.0103232
29124	0.0103195
28361	0.0103144
8703	0.0103137
34412	0.0103117
34662	0.010309
35275	0.0103065
49210	0.0102982
26247	0.0102971
30598	0.0102955
44617	0.0102938
15932	0.0102889
660	0.0102822
7794	0.0102744
3399	0.0102714
18115	0.010271
14465	0.0102626
38101	0.0102605
34207	0.0102599
11767	0.0102575
29175	0.0102517
13343	0.0102429
19244	0.0102429
31824	0.0102408
35479	0.0102302
15134	0.010228
12276	0.0102128
10858	0.0102046
33986	0.0102032
19241	0.0102013
36199	0.0101969
8773	0.0101935
23929	0.010193
15649	0.0101922
432	0.0101788
11699	0.0101693
19839	0.0101657
39581	0.010163
1655	0.0101601
8741	0.0101577
1812	0.0101478
13638	0.0101313
49080	0.0101289
20672	0.0101249
36550	0.010121
16763	0.0101133
31868	0.0101109
33091	0.0101084
26545	0.0101035
9626	0.0100967
26414	0.0100952
47151	0.0100934
25030	0.0100853
14962	0.0100755
43337	0.0100718
17067	0.0100658
44619	0.0100618
13751	0.0100587
1234	0.0100523
26105	0.0100458
15346	0.0100225
16466	0.0100189
15343	0.0100186
15934	0.0100172
16500	0.0100166
43575	0.0100117
41633	0.0100113
17069	0.0100076
12233	0.0100073
23225	0.0100041
4941	0.0100004
25828	0.00998936
37342	0.00998838
20529	0.00998611
1405	0.00998249
10860	0.009976
29629	0.00997574
45071	0.00997154
7879	0.00995723
35547	0.00995606
34894	0.00995141
12895	0.0099447
36061	0.00994123
8423	0.009941
31863	0.00993895
45031	0.00993618
21365	0.00993355
10467	0.0099334
21217	0.00993198
12012	0.0099314
41716	0.00992628
26502	0.00992548
36904	0.00992427
36105	0.009918
33349	0.00991757
38284	0.00991455
41154	0.00991234
9522	0.00991134
11028	0.00991018
48373	0.00990968
32168	0.00990216
24563	0.00990099
9889	0.00989758
35049	0.00989544
11716	0.00989276
16044	0.00989192
9869	0.00989013
43894	0.00987942
28417	0.00987763
49982	0.00987749
43849	0.00987663
35279	0.00987648
16591	0.00987195
49083	0.00987141
21370	0.00986946
39476	0.00986938
8961	0.00986322
3470	0.0098626
5430	0.00986054
38630	0.00985964
1991	0.00984786
13687	0.00984755
48296	0.00984472
27997	0.00984465
17072	0.00983994
13515	0.00983972
23810	0.00983259
46445	0.00983192
12896	0.0098244
18698	0.00982174
23279	0.00981959
39268	0.00981926
1753	0.0098129
15345	0.00981161
42935	0.00981005
7194	0.00980632
12892	0.00980555
15507	0.00980046
23811	0.00979893
1400	0.00979871
30662	0.00979757
23863	0.00979681
33975	0.00979574
44643	0.00979456
13699	0.00978785
48769	0.00978725
47337	0.0097845
486	0.00977492
30520	0.0097688
29125	0.00976807
16751	0.00976509
22308	0.00976453
36185	0.00976239
27757	0.0097619
30635	0.00976053
41574	0.00976013
5735	0.00975555
4000	0.00975442
31906	0.00975415
28340	0.00975211
39992	0.00975108
4042	0.00974852
24206	0.00974381
9624	0.00974122
6704	0.00974069
37498	0.0097385
29123	0.00973833
39444	0.0097368
23834	0.00973339
3799	0.00973096
6005	0.00973088
35277	0.00973042
17910	0.00972981
19810	0.00972934
9437	0.00972919
28831	0.00972861
3332	0.00972784
15025	0.00972765
47839	0.00972384
49586	0.0097194
19773	0.00971633
38383	0.0097162
20604	0.00970196
15553	0.00970105
1867	0.00969766
2910	0.0096955
19324	0.00969434
37337	0.00969218
7496	0.00969021
33853	0.00968902
35852	0.00968816
5403	0.00968733
45141	0.00968613
28345	0.00968565
18911	0.00968443
37650	0.00967927
23412	0.009676
28401	0.00967526
28336	0.00967321
23518	0.00967244
39638	0.00966868
16873	0.00966589
11934	0.00966414
45032	0.00966303
9121	0.00966231
14217	0.00966179
30681	0.00966115
11508	0.00966023
2032	0.00965952
19723	0.0096572
23908	0.00965559
40339	0.00965423
30084	0.0096538
49111	0.00965287
9662	0.00965037
21275	0.00964211
1399	0.00963794
48293	0.00963454
32572	0.00963209
30636	0.00962993
19365	0.00962982
9830	0.0096272
2570	0.0096272
39316	0.0096269
5940	0.00962154
24467	0.0096211
7501	0.00961985
48326	0.00961591
34083	0.00961437
2029	0.0096129
24040	0.00960982
22994	0.00960893
9156	0.00960459
33983	0.00960302
27844	0.00960179
9829	0.00960078
49178	0.00960065
39773	0.00959788
9760	0.00959752
30634	0.00959605
27649	0.00959533
7126	0.00959252
2042	0.00959011
20673	0.0095853
37341	0.00958153
10602	0.00957292
21824	0.00957266
25005	0.00956879
6004	0.00956818
17893	0.00956573
39716	0.00956555
16691	0.00956254
35221	0.00956073
49113	0.00955141
23273	0.00954409
11378	0.00954262
16494	0.00954252
7948	0.00954082
431	0.00954081
37266	0.0095401
2518	0.00953931
37268	0.0095372
33920	0.00953541
7738	0.00953495
12208	0.00953427
49206	0.00953172
9684	0.00953017
12894	0.00952849
39446	0.00952476
45258	0.00952438
33976	0.00952125
13163	0.00952061
21162	0.00951922
27596	0.00951748
12241	0.00951375
16761	0.0095136
12968	0.0095126
40431	0.00950773
1779	0.00950749
4409	0.0095069
5343	0.00950537
16454	0.009496
12623	0.00949517
35235	0.00949406
42085	0.00949252
24606	0.0094911
19256	0.00949071
1329	0.00948704
40324	0.00948336
37414	0.0094822
20675	0.00947655
34424	0.00947471
11555	0.00947067
38102	0.00946942
28382	0.0094678
3995	0.00946682
4377	0.00946215
9785	0.0094617
4375	0.0094608
33237	0.00946071
21667	0.00945925
13532	0.00945875
36810	0.00945628
49674	0.00944374
13713	0.00944267
29033	0.00943936
7759	0.00943823
41569	0.00943686
34688	0.00943313
19331	0.00943005
39964	0.00942899
12199	0.00942739
35911	0.00942453
41244	0.0094212
35053	0.00942035
8162	0.00941971
12295	0.0094196
3998	0.00941849
11945	0.00941797
11533	0.00941644
24306	0.00941493
45000	0.00941434
11753	0.00941292
45421	0.00941137
35870	0.00941068
16155	0.0094093
20160	0.0094038
40633	0.00940261
24668	0.00940133
3736	0.0093986
22732	0.00939468
9866	0.00939408
36069	0.00939405
21371	0.00939057
14556	0.00938851
28751	0.00938761
12737	0.0093858
7275	0.0093851
8254	0.00938426
15893	0.00938322
26417	0.00938072
17344	0.00937102
14304	0.00936924
24605	0.0093642
19398	0.00936348
10788	0.00936342
36601	0.00936282
7195	0.00936206
40415	0.00936115
15337	0.00936109
38432	0.00935782
26499	0.00935635
10825	0.00935619
32154	0.00935409
22857	0.00935315
6520	0.00935093
35450	0.00934814
8926	0.00934666
38914	0.00934637
13142	0.00934561
1698	0.00934501
39315	0.00934186
3053	0.00934146
10775	0.00934047
30676	0.00933904
6267	0.00933663
20871	0.00933562
28339	0.00933218
27788	0.00933012
45030	0.00932519
35984	0.00932345
7078	0.00932293
27771	0.00932001
483	0.00931905
45264	0.00931785
50680	0.00931743
42367	0.00931386
33977	0.00931336
654	0.00931302
29014	0.00931168
44989	0.00930741
12632	0.00930661
27841	0.00930538
34084	0.00930398
4748	0.00930165
48569	0.0093008
22153	0.00929939
11146	0.00929935
11586	0.00929797
2812	0.00929741
13994	0.00929721
46584	0.00929639
12211	0.00929624
20679	0.00929434
22304	0.00929273
29503	0.00929003
22312	0.00928925
10436	0.00928684
4119	0.00928669
36808	0.00928396
40326	0.00927836
31580	0.00927464
7635	0.00927381
49645	0.00927301
8704	0.00927266
24753	0.00927199
22399	0.00926981
48824	0.00926931
9072	0.00926919
11029	0.0092674
28825	0.00926466
16903	0.00926305
33484	0.00926303
45887	0.0092611
13252	0.00925908
10943	0.0092584
44616	0.0092555
1875	0.0092513
32447	0.00924996
5983	0.00924924
35629	0.00924693
10973	0.00924654
13978	0.00923815
50728	0.00923604
48829	0.00923486
36060	0.00923339
14035	0.00923045
26266	0.00922937
8030	0.00922891
15670	0.00922696
23447	0.00922592
36183	0.00922403
46640	0.00922385
5338	0.00922005
12816	0.00921741
27358	0.00921706
33249	0.00921549
3886	0.00921535
23927	0.00921285
41723	0.00921178
9991	0.00921115
7107	0.00920953
17719	0.00920817
4232	0.00920756
30591	0.0092038
9879	0.00920359
335	0.00920268
13996	0.00920262
37540	0.00920219
428	0.00919672
18832	0.00919629
1398	0.00919628
13345	0.0091955
3559	0.00919448
16920	0.00919398
16141	0.00919177
1239	0.00918886
14661	0.00918666
14678	0.00918283
3711	0.00918221
9622	0.00917766
9548	0.00917752
15042	0.00917715
10571	0.00917693
10862	0.00917535
1878	0.00917417
39313	0.00917365
3392	0.00917274
32049	0.00917187
32243	0.00917165
21216	0.00916876
23973	0.00916777
44461	0.0091649
33471	0.00916269
5438	0.00915962
12239	0.0091587
47621	0.00915733
25147	0.00915561
25733	0.00915497
17905	0.00915375
4354	0.00915176
13867	0.00915168
14279	0.00915051
25021	0.00914885
14353	0.00914759
45533	0.00914755
48358	0.00914557
15927	0.00914371
48321	0.00914369
32445	0.00914368
22014	0.00914268
13430	0.00913949
11858	0.00913743
20671	0.00913737
9798	0.00913573
10972	0.00913562
38846	0.00913252
32834	0.00913138
34581	0.0091301
19314	0.00912917
8228	0.00912871
463	0.00912853
25641	0.00912833
17916	0.00912815
41000	0.0091277
41130	0.00912746
16703	0.00912722
32455	0.00912656
22960	0.00912556
8552	0.0091246
10970	0.00912455
11894	0.00912392
14120	0.0091239
2442	0.00912382
45001	0.00912253
8543	0.00912227
38635	0.00912139
46939	0.00912019
15001	0.00911766
36605	0.0091173
14354	0.00911689
44076	0.00911546
21360	0.00911243
7163	0.00911092
4040	0.00910838
34165	0.00910706
13721	0.00910393
25029	0.00910344
25279	0.00910322
15664	0.0091027
37336	0.00910185
34456	0.00910163
15005	0.00909844
18657	0.00909806
15663	0.00909754
44740	0.00909745
20069	0.0090973
25034	0.00909614
15746	0.00909401
36068	0.00909272
15010	0.00909197
5723	0.00908963
12001	0.00908891
29344	0.00908888
18618	0.00908875
5727	0.0090884
17904	0.00908345
336	0.00908116
16882	0.00908087
4373	0.00908024
29129	0.00908023
49672	0.00907902
36129	0.00907814
42865	0.00907789
26253	0.00907635
2349	0.0090745
39070	0.00907377
7274	0.0090735
23203	0.0090709
23478	0.00907089
44615	0.00906922
16442	0.00906895
12474	0.00906507
36436	0.00906375
21272	0.0090625
15218	0.00905998
9721	0.00905973
44261	0.00905906
3790	0.00905701
36136	0.00905686
26456	0.00905427
448	0.0090532
28448	0.00905291
33620	0.00905221
23980	0.0090458
34365	0.00904271
3996	0.00904103
8706	0.0090401
27836	0.00903954
22254	0.0090386
27361	0.00903786
29134	0.00903573
48399	0.00903509
43844	0.00903366
13169	0.00903259
38330	0.00903184
6648	0.00903138
13998	0.00903066
18757	0.00902963
14491	0.00902936
8625	0.00902911
43793	0.00902842
27760	0.00902662
28418	0.00902562
10211	0.00902511
16900	0.00902346
28576	0.00902202
12006	0.00901848
18783	0.00901833
29112	0.0090151
9445	0.00901309
49995	0.0090122
28383	0.00901187
41629	0.00900953
50266	0.00900897
43845	0.00900852
2745	0.00900409
9845	0.00900404
36972	0.00900215
32277	0.00900073
34656	0.00899988
36165	0.00899958
27394	0.00899942
17943	0.00899859
48403	0.00899763
30354	0.00899522
27809	0.00899215
33468	0.00899215
28639	0.00899038
21739	0.00898905
49966	0.0089887
39710	0.00898851
3128	0.00898681
33211	0.0089849
25001	0.00898466
13569	0.00898189
13161	0.00897988
3999	0.00897882
42329	0.00897881
2569	0.00897868
482	0.00897867
25131	0.00897538
16876	0.00897454
34405	0.00897301
655	0.00897184
16775	0.00897118
32195	0.00897017
32924	0.00896931
32438	0.00896907
18439	0.0089679
22175	0.00896725
47728	0.00896642
37651	0.00896496
22984	0.00896477
44295	0.00896331
10869	0.00896283
3564	0.00896107
41634	0.00896033
10670	0.00895913
20158	0.00895693
32571	0.00895674
6538	0.00895289
20916	0.0089524
33040	0.00895227
1948	0.00895088
13836	0.00894546
28980	0.00894417
14057	0.00894046
37383	0.00893885
46320	0.00893526
21374	0.00892946
14223	0.00892742
2749	0.00892725
15428	0.00892681
5466	0.00892565
35054	0.00892452
21001	0.00892432
12837	0.00892392
16363	0.00891878
20575	0.00891687
12213	0.00891629
13189	0.00891527
45025	0.00891487
39765	0.00891445
4700	0.00891194
34726	0.00891082
37160	0.00891075
45869	0.00890677
46654	0.00890504
8929	0.00890256
38121	0.00890237
28353	0.00890063
45145	0.00889935
41001	0.00889719
3630	0.008893
13826	0.00889294
2771	0.00889286
14285	0.00889215
49202	0.00889106
15894	0.00888658
26560	0.00888593
23830	0.00888422
39290	0.00888386
484	0.00888346
38931	0.00888265
16774	0.00888259
13352	0.00888214
20563	0.00887842
45114	0.00887828
43851	0.00887738
29048	0.00887728
6002	0.00887616
42084	0.00887585
49986	0.00887494
13814	0.00887267
15763	0.00887168
41930	0.00886919
7671	0.00886712
37564	0.00886467
22287	0.00886396
29734	0.00886388
13334	0.00886178
49323	0.00886017
4545	0.00885999
10849	0.00885976
25127	0.00885843
16252	0.00885798
50220	0.00885766
24717	0.00885638
14083	0.00885603
23758	0.00885518
36890	0.0088544
9759	0.00885139
39443	0.00885114
25002	0.00884938
24067	0.00884914
32147	0.00884762
32153	0.00884629
35429	0.00884531
14823	0.00884423
903	0.00884166
4422	0.00883889
19933	0.00883821
8022	0.00883554
18958	0.00883414
46560	0.00883347
13494	0.00883271
34695	0.00883186
8958	0.0088316
24303	0.00882964
45002	0.00882781
3964	0.00882593
36107	0.00882481
37114	0.00882451
19143	0.00882292
29882	0.00882143
32833	0.00881929
24368	0.00881883
28984	0.00881808
41384	0.00881639
12739	0.0088149
18308	0.00881476
21898	0.00881395
19065	0.00881363
32570	0.00881347
25026	0.0088128
8647	0.00881176
23072	0.00881012
15332	0.00881001
17334	0.00880913
22650	0.00880832
24604	0.00880423
12305	0.00880318
50037	0.00880318
24667	0.00880174
15211	0.00879842
13066	0.00879761
15936	0.00879758
37579	0.00879574
418	0.00879472
10599	0.00879461
30350	0.00879291
21059	0.00879222
34419	0.00879131
22652	0.00879009
48325	0.00878801
13341	0.00878693
41981	0.00878648
49740	0.00878548
45526	0.00878394
35390	0.00877969
14311	0.0087794
25955	0.00877901
13742	0.00877809
20723	0.00877804
44578	0.0087777
41206	0.00877762
13202	0.00877644
39990	0.00877621
35916	0.00877415
19321	0.00877388
26509	0.00877297
1688	0.0087721
28295	0.00877205
7273	0.00877126
19371	0.00876969
24596	0.00876922
10997	0.00876895
36443	0.00876873
7952	0.00876848
38365	0.00876773
29762	0.00876703
22322	0.00876529
11079	0.00876497
16773	0.00876469
39410	0.00876454
15669	0.00876359
25238	0.00876083
1394	0.00876052
31687	0.00875828
6530	0.00875538
7106	0.00875526
12622	0.00875344
22288	0.00875152
36729	0.00875118
9982	0.00874975
45428	0.00874666
32203	0.00874581
15340	0.0087449
6906	0.00874464
37975	0.00874423
2059	0.00874375
26252	0.00874309
42318	0.00874134
29017	0.00874097
23073	0.00874083
5874	0.00874016
10871	0.00873902
29018	0.0087389
22916	0.00873864
25132	0.00873712
26442	0.00873656
32262	0.00873649
13145	0.00873618
7750	0.00873554
5256	0.00873365
42633	0.0087328
27268	0.0087324
25141	0.00873125
4741	0.00873027
22307	0.00872666
46218	0.00872625
5952	0.00872611
33985	0.00872547
21835	0.00872224
22329	0.00872212
18715	0.00872099
4427	0.00872026
11928	0.00871805
9266	0.00871578
1331	0.00871487
28640	0.0087136
34185	0.0087129
8240	0.0087113
44464	0.00871125
1126	0.00870953
26853	0.00870931
27751	0.00870824
32308	0.00870775
45290	0.00870767
14673	0.00870706
19328	0.00870448
45205	0.00870203
15312	0.00870201
7062	0.00870126
15757	0.00870118
15000	0.0087007
16039	0.00869943
6646	0.00869849
13086	0.00869845
32174	0.00869755
49649	0.00869655
42376	0.00869608
19261	0.00869556
42278	0.00869383
16998	0.00869087
6508	0.00869041
30425	0.00869035
48903	0.00868996
42597	0.00868731
25878	0.00868456
33621	0.00868305
22989	0.00868207
42890	0.00867909
14785	0.00867905
32178	0.00867868
202	0.00867801
30557	0.00867663
338	0.00867648
25418	0.00867616
35955	0.00867514
44903	0.00867313
4264	0.00867312
3519	0.00867254
47764	0.00867253
28940	0.0086724
17709	0.00867203
9696	0.00867191
14569	0.00867027
2860	0.00866902
5795	0.00866757
32813	0.00866739
19583	0.00866646
1730	0.00866625
49741	0.00866482
6911	0.0086641
33955	0.00866385
14715	0.00866305
18959	0.00866123
5875	0.00866082
49985	0.00865737
24389	0.00865726
25826	0.00865709
47957	0.00865655
34200	0.00865629
50257	0.00865501
2496	0.00865473
31953	0.00865329
18730	0.00865307
49978	0.00865216
19655	0.00865206
48047	0.00865196
29461	0.00864932
35495	0.00864808
49160	0.00864745
24593	0.00864626
281	0.00864529
22255	0.00864341
48028	0.00864315
9101	0.00864299
13816	0.00864242
32263	0.00864201
45250	0.00864188
16779	0.00864115
19399	0.0086398
11430	0.00863718
261	0.00863658
9716	0.00863647
39707	0.0086353
12232	0.00863509
41806	0.00863477
14309	0.00863433
9435	0.00863396
37991	0.00863268
3408	0.008632
45719	0.00863137
24998	0.0086302
30186	0.00862984
4920	0.00862897
16272	0.00862847
32530	0.00862709
35192	0.00862704
14107	0.00862673
32152	0.00862643
3456	0.00862561
385	0.00862543
48402	0.00862501
6108	0.00862395
49980	0.00862328
5905	0.0086232
41568	0.00862283
44791	0.00862091
22379	0.00861952
46740	0.00861948
41635	0.00861916
15298	0.00861877
36701	0.00861833
3092	0.00861814
31577	0.00861715
18623	0.00861688
9460	0.00861499
32938	0.00861453
32292	0.00861285
23950	0.00861145
9867	0.0086102
5724	0.00860892
22193	0.00860883
37267	0.0086082
24150	0.00860703
13351	0.00860532
5538	0.00860518
30069	0.00860502
39309	0.0086048
29010	0.00860307
39435	0.00860216
26558	0.00860172
25714	0.00860159
15232	0.0086012
16795	0.00859994
24561	0.00859852
23052	0.00859798
601	0.00859773
21368	0.00859736
26861	0.00859695
18658	0.00859675
39291	0.00859643
12080	0.00859598
28313	0.00859202
25068	0.00858879
26269	0.00858749
1868	0.00858688
19422	0.00858578
16048	0.00858548
5793	0.00858031
1061	0.00857992
9983	0.00857955
40559	0.00857931
45010	0.00857887
16128	0.00857881
7540	0.00857864
12009	0.00857833
39775	0.00857811
10774	0.00857809
28716	0.0085776
34394	0.00857693
32575	0.00857508
8029	0.00857245
48359	0.00857154
15509	0.00857101
48051	0.00857078
49960	0.00857038
12133	0.00856783
41980	0.00856751
10786	0.00856609
4728	0.00856554
38685	0.00856545
3791	0.00856488
34677	0.00856456
7954	0.00856302
11557	0.00856241
39836	0.00856134
28827	0.00855974
29672	0.00855746
25738	0.0085569
12740	0.00855613
40505	0.00855607
17321	0.00855593
28913	0.0085549
49071	0.00855401
48376	0.00855279
42938	0.00855189
44996	0.00855123
19197	0.0085506
5845	0.00855051
30606	0.00854886
30616	0.00854778
30396	0.00854494
23904	0.00854295
23956	0.00854167
2028	0.00854165
30414	0.00854164
43436	0.00854148
39764	0.00854091
32950	0.00853847
13348	0.00853643
6362	0.00853618
15626	0.00853526
27366	0.00853438
15348	0.00853376
48070	0.00853347
32191	0.00853308
225	0.00853291
20722	0.00852995
16883	0.00852979
14224	0.00852926
10797	0.00852878
11022	0.00852873
27357	0.00852806
27846	0.00852535
47378	0.00852379
11904	0.00852342
49958	0.00852226
41520	0.00852047
35417	0.00852026
27463	0.00851839
35339	0.00851799
24145	0.00851774
32186	0.0085156
5533	0.00851538
18607	0.00851412
11941	0.0085118
14789	0.00851141
31865	0.00850997
13801	0.00850923
29062	0.00850851
30617	0.00850849
44577	0.00850677
26346	0.00850671
6509	0.00850627
17925	0.00850623
29040	0.0085061
9569	0.00850554
12832	0.00850398
41402	0.00850394
39068	0.00850314
41734	0.00850271
1876	0.00850242
12825	0.00850169
45262	0.00850099
26586	0.00849958
14889	0.00849939
35419	0.00849886
16437	0.00849883
39270	0.0084987
2375	0.00849852
46396	0.00849661
23905	0.0084956
4230	0.00849464
7536	0.008494
13881	0.00849355
8092	0.00849161
2097	0.00849119
23173	0.0084903
2905	0.00848993
38907	0.00848919
9656	0.00848816
6653	0.00848765
17803	0.00848752
44808	0.00848736
32841	0.00848668
1397	0.00848592
13542	0.00848467
9692	0.00848438
29881	0.00848431
10595	0.00848429
49259	0.00848248
19263	0.00848238
27487	0.00848225
39475	0.00848215
16145	0.00848177
15665	0.00848061
31852	0.00847998
2234	0.00847935
41718	0.00847594
15618	0.00847528
15342	0.00847113
13250	0.00847105
18633	0.00847024
23272	0.00846943
49048	0.00846871
16056	0.00846813
41702	0.00846654
12469	0.0084664
43378	0.00846555
12003	0.00846327
38216	0.00846228
35474	0.00846141
9995	0.00846087
25003	0.00845982
48593	0.00845924
2274	0.00845698
45056	0.00845693
7077	0.0084566
28429	0.0084556
15295	0.00845495
15565	0.0084549
8517	0.0084544
24156	0.00845288
27062	0.00845267
32189	0.00845157
13718	0.00845147
14290	0.00845135
16927	0.00845083
26074	0.00845063
27080	0.00845001
23960	0.00844886
2249	0.00844779
30507	0.00844766
974	0.00844759
187	0.00844717
22398	0.00844661
4826	0.00844546
10237	0.00844513
20018	0.00844425
12636	0.00844382
46070	0.00844293
14037	0.00844176
40446	0.00844077
21940	0.00844052
2034	0.00844011
14238	0.00843989
29501	0.0084392
13752	0.00843862
47856	0.00843845
34182	0.00843523
34696	0.00843514
18634	0.00843358
11148	0.00843196
48766	0.00843083
48283	0.0084284
22376	0.00842721
22170	0.00842456
39781	0.00842347
961	0.00842309
16984	0.00842169
42344	0.00842161
35956	0.00842111
50016	0.00842066
12899	0.00841955
24378	0.00841689
27320	0.00841651
41518	0.00841603
17804	0.00841554
33481	0.00841462
11897	0.00841379
40178	0.00841338
6334	0.00841234
48294	0.00841221
30387	0.00840944
7289	0.0084082
10617	0.00840754
25133	0.00840681
686	0.00840634
11499	0.00840617
14887	0.00840551
33494	0.00840531
35706	0.0084044
46832	0.0084041
13856	0.00840299
41385	0.00840206
2573	0.00840184
5839	0.00840161
45945	0.00839941
2739	0.00839926
15807	0.00839827
43604	0.00839807
10640	0.00839729
26970	0.0083966
28915	0.00839555
42110	0.00839519
36596	0.00839441
29774	0.00839429
38327	0.00839394
34765	0.00839078
16875	0.0083901
2685	0.00838909
38826	0.00838876
16152	0.00838863
4205	0.00838747
38619	0.00838727
31903	0.00838592
2524	0.0083859
47765	0.00838501
4639	0.00838476
15351	0.00838436
49443	0.00838327
14292	0.00838292
36204	0.00838087
49834	0.00838003
25333	0.00837938
38287	0.00837922
9992	0.00837894
38521	0.00837839
15089	0.00837734
4406	0.00837611
12215	0.00837441
35066	0.00837385
37512	0.00837382
32080	0.0083738
49536	0.00837331
32050	0.00837264
7605	0.00837168
28413	0.00836963
11008	0.00836886
15568	0.00836885
4699	0.00836843
9268	0.00836812
30801	0.00836792
45429	0.00836765
15667	0.00836736
23350	0.00836724
8694	0.00836672
25734	0.00836516
17895	0.00836489
20186	0.0083642
41403	0.00836376
29894	0.00836355
951	0.00836338
26427	0.00836266
11178	0.00836167
10540	0.00836066
27359	0.00836002
32797	0.00835898
38908	0.00835897
49120	0.00835879
11738	0.00835878
11180	0.00835869
13338	0.00835736
15555	0.00835684
34845	0.00835668
16386	0.00835622
30620	0.00835274
20824	0.0083521
46508	0.00835143
31864	0.00835138
9247	0.00835127
7665	0.00834955
49069	0.00834795
32182	0.00834679
44705	0.00834262
441	0.00834216
15368	0.00834158
30311	0.00834029
491	0.00833804
21983	0.00833796
12897	0.00833778
19043	0.00833762
28686	0.00833731
13541	0.00833712
21285	0.00833648
12720	0.00833637
17976	0.00833577
30926	0.00833521
41715	0.00833265
43579	0.00833233
20808	0.00833217
9881	0.0083319
14998	0.00833093
15766	0.00833033
8708	0.00832887
25148	0.00832694
11915	0.00832677
36980	0.00832523
48994	0.00832351
12719	0.00832314
33973	0.00832311
9931	0.00832301
26942	0.00832287
1979	0.00832104
16735	0.00832088
34356	0.00831984
50132	0.00831964
28169	0.00831957
16416	0.00831921
36806	0.00831895
14821	0.00831822
40951	0.00831818
28815	0.00831813
12055	0.00831731
16287	0.00831684
14064	0.00831679
33234	0.0083134
26409	0.00831306
46778	0.00831272
38510	0.00831267
25812	0.00831244
12052	0.00831168
42271	0.00831162
13151	0.00831075
5784	0.00831047
2256	0.00830979
19813	0.00830872
15333	0.00830862
32499	0.00830851
1990	0.00830849
43508	0.00830629
30770	0.00830545
29131	0.00830485
35278	0.00830479
41802	0.00830322
41482	0.00830073
17930	0.00830066
5991	0.00829935
12240	0.00829917
35060	0.00829742
39623	0.00829663
38174	0.00829588
21002	0.00829573
9069	0.0082931
14698	0.00829272
15890	0.00829232
3989	0.00829192
30409	0.00829059
46317	0.00829048
45939	0.00829028
42912	0.00828896
10544	0.00828627
15021	0.00828535
11922	0.00828497
36976	0.0082849
13191	0.00828476
24182	0.00828431
32801	0.00828414
47912	0.00828366
20691	-0.00828348
9492	0.00828154
6592	0.00828113
39314	0.00828106
6331	0.00828096
38910	0.00827836
27855	0.00827684
49964	0.00827662
44215	0.00827402
34204	0.00827262
38629	0.00827184
40998	0.00827147
10459	0.00827017
39175	0.00826919
45259	0.0082689
45076	0.00826857
23267	0.00826857
48457	0.00826742
32232	0.00826662
44527	0.00826661
49671	0.00826464
20000	0.00826461
12158	0.00826445
695	0.00826401
11033	0.00826355
3632	0.00826248
16253	0.00826228
20852	0.00826213
35226	0.00826176
25908	0.00826133
5985	0.00826109
33852	0.00825952
11568	0.00825855
23665	0.00825804
45378	0.00825722
14939	0.00825679
48360	0.00825564
38118	0.00825532
38803	0.00825514
44255	0.00825498
30964	0.00825383
19426	0.00825369
2460	0.00825114
28405	0.00825085
14321	0.00824989
12704	0.00824972
14953	0.00824958
26655	0.00824947
49998	0.00824931
25879	0.00824735
44529	0.00824714
49954	0.00824704
35765	0.00824628
14561	0.00824624
492	0.00824607
9233	0.00824606
5210	0.00824533
21367	0.00824503
26848	0.00824458
45303	0.0082442
12525	0.00824356
28362	0.00824282
19311	0.00823901
50085	0.00823899
9234	0.00823898
37211	0.00823822
45117	0.00823821
27851	0.00823767
38624	0.00823755
3838	0.00823718
47105	0.00823628
35280	0.00823608
31925	0.00823558
36807	0.00823266
29161	0.00823095
459	0.0082304
8995	0.00822985
45523	0.00822942
12826	0.00822932
28347	0.00822899
2095	0.00822882
45388	0.00822821
6573	0.00822788
43622	0.00822721
13244	0.00822575
8576	0.00822533
14052	0.00822456
13964	0.0082237
28372	0.00822367
7072	0.00822336
10772	0.00822319
39884	0.00822233
40059	0.00822218
44673	0.00822206
1912	0.00822144
40293	0.00822136
36833	0.00822125
24390	0.00822086
11025	0.00822
11892	0.0082193
4372	0.00821529
6510	0.00821527
3416	0.00821489
38829	0.00821446
26625	0.0082144
25535	0.00821433
27747	0.00821389
13141	0.0082136
5120	0.00821288
39659	0.00821216
42847	0.00821057
18458	0.0082104
20556	0.00821036
26565	0.00820937
29059	0.00820828
2738	0.00820744
4636	0.00820742
35021	0.00820742
7096	0.00820742
16724	0.00820669
21185	0.0082058
11550	0.00820551
50775	0.00820525
22974	0.00820503
16985	0.00820351
27455	0.00820205
29039	0.0082016
14435	0.00820148
49668	0.00819926
26589	0.00819899
23074	0.00819741
36819	0.00819708
21167	0.00819669
31926	0.00819562
41724	0.0081946
28718	0.00819408
50242	0.00819252
28938	0.00819197
35455	0.00819194
2493	0.00819184
37117	0.00819166
25829	0.0081916
42971	0.00819093
337	0.00819078
15706	0.0081903
16772	0.00818944
13539	0.00818768
6513	0.00818766
29022	0.00818741
22865	0.0081869
34417	0.00818678
48198	0.00818584
45009	0.00818572
11358	0.00818385
32951	0.00818361
9833	0.00818312
12789	0.00818277
26930	0.00818188
21380	0.00818181
15326	0.00818122
41632	0.00818009
50023	0.00817996
15572	0.00817832
9816	0.00817809
27824	0.00817741
21964	0.00817568
29618	0.0081754
6279	0.00817538
18446	0.00817531
27356	0.00817487
35340	0.00817463
16291	0.00817258
476	0.00817163
4002	0.0081712
41931	0.00817049
27856	0.00817042
5770	0.00816961
21381	0.00816906
38411	0.00816827
40685	0.00816803
22271	0.00816778
26886	0.00816713
33855	0.00816616
4371	0.00816604
10777	0.00816511
34500	0.00816473
20724	0.00816384
37263	0.00816269
12228	0.00816156
33978	0.00816051
29523	0.00815898
26264	0.00815861
6107	0.00815859
16433	0.0081578
21373	0.00815751
4043	0.00815671
4751	0.00815655
33571	0.00815653
33412	0.00815644
17103	0.00815614
43882	0.00815545
2414	0.00815535
18742	0.00815223
37972	0.00815193
25631	0.00815166
5574	0.00815095
29165	0.00815095
4019	0.00815031
47659	0.00815009
49994	0.00815006
2061	0.00814933
14787	0.00814906
24999	0.00814894
12344	0.00814794
42036	0.0081479
40296	0.0081478
14954	0.00814692
45208	0.00814686
2571	0.00814681
22648	0.00814592
5260	0.00814535
32574	0.00814479
10866	0.00814455
3473	0.00814317
50703	0.00814317
24152	0.00814221
22280	0.00814132
22963	0.00814124
10570	0.00814118
10743	0.00814043
40841	0.00813927
17832	0.00813891
33477	0.00813882
16736	0.0081387
35939	0.00813857
12016	0.0081372
28166	0.00813621
41202	0.00813571
46927	0.00813477
5703	0.00813458
8646	0.00813335
5821	0.00813274
31323	0.00813221
37331	0.00813174
29554	0.00813169
32804	0.00813151
44822	0.00813076
10770	0.00813055
18605	0.00812978
44840	0.00812963
16388	0.00812945
32577	0.00812881
36813	0.00812847
31722	0.00812676
24466	0.00812533
1371	0.00812422
19447	0.00812413
12716	0.00812372
16693	0.00812332
46102	0.00812309
27853	0.00812285
31411	0.00812272
3402	0.00812218
25004	0.008122
1735	0.00812169
38911	0.00812044
5914	0.00811985
2684	0.008119
19468	0.00811806
45520	0.00811804
4356	0.008116
10993	0.00811546
6909	0.00811431
32333	0.00811423
39587	0.0081139
14751	0.00811368
26885	0.00811352
5542	0.00811351
50719	0.0081133
23647	0.00811324
43843	0.00811269
24173	0.00811259
13714	0.00811113
35869	0.00810943
13712	0.00810769
7276	0.0081069
32044	0.00810653
36973	0.00810579
10784	0.00810457
40097	0.00810426
13727	0.00810415
6361	0.00810356
38314	0.00810298
19258	0.00810292
29736	0.00810224
20180	0.00810157
15313	0.00810115
1978	0.00810098
46789	0.00810088
38633	0.00809979
49054	0.00809903
46605	0.00809902
17090	0.00809883
22310	0.00809827
3619	0.00809769
14788	0.00809689
23202	0.00809667
26217	0.00809636
5311	0.00809624
28304	0.00809571
26172	0.00809536
7341	0.00809477
31578	0.0080943
19054	0.0080941
29927	0.00809288
10146	0.0080924
26265	0.00809152
41004	0.0080914
45079	0.00809044
30758	0.0080904
50692	0.00808958
45215	0.00808949
24985	0.00808767
10806	0.00808722
8570	0.00808709
47101	0.00808617
29730	0.00808607
9102	0.00808451
6593	0.00808128
2017	0.00808081
637	0.00807966
1953	0.00807934
19322	0.00807895
33052	0.00807806
12834	0.00807792
34981	0.00807554
44809	0.00807485
3779	0.00807481
519	0.00807464
43796	0.00807349
8091	0.0080726
26449	0.0080725
41570	0.00807147
26213	0.00807107
18845	0.00807039
26102	0.0080699
11214	0.00806954
717	0.00806923
6719	0.00806848
35488	0.00806801
15338	0.00806625
7198	0.008066
18956	0.00806585
34473	0.0080656
17132	0.0080655
1769	0.00806436
32919	0.00806325
7504	0.00806309
16432	0.00806268
15855	0.00806099
49319	0.00806092
33451	0.00806045
49011	0.00806004
8540	0.00805943
28236	0.00805841
41630	0.00805805
19362	0.00805801
42445	0.0080575
14464	0.00805749
12312	0.00805735
27866	0.00805732
29060	0.0080559
17886	0.00805539
27790	0.00805491
35211	0.00805488
378	0.00805439
42338	0.00805417
13302	0.00805266
17589	0.00805197
31990	0.00805167
8959	0.00805131
44463	0.00805127
36814	0.00805095
12236	0.00804969
15077	0.00804954
29527	0.00804932
14901	0.00804912
17173	0.00804817
20184	0.00804722
5295	0.00804683
3837	0.00804635
22446	0.00804603
15294	0.00804505
15008	0.00804363
3759	0.00804341
32448	0.00804163
29174	0.00804126
35055	0.00804118
11310	0.00804112
46738	0.00804111
10236	0.00804105
45774	0.00804089
34675	0.00803926
32909	0.00803919
19766	0.00803887
26245	0.00803797
15688	0.00803777
46882	0.00803675
24481	0.00803616
18521	0.0080349
18863	0.00803457
16492	0.00803418
18424	0.00803378
30431	0.00803358
30161	0.00803307
41368	0.0080318
6575	0.00802994
35857	0.00802952
45005	0.00802951
1387	0.00802885
49989	0.00802831
29233	0.00802829
30776	0.00802649
17692	0.00802643
24386	0.00802559
38175	0.00802543
31022	0.00802538
9649	0.00802446
28621	0.00802365
1232	0.00802363
19928	0.00802352
29068	0.00802343
36595	0.0080221
20012	0.00802101
27472	0.00802093
12481	0.00802039
25319	0.00802022
38430	0.00802019
9005	0.00801963
[truncated: 31,643 more rows]

## Sheet: Supplementary Table 5B
Gene ID (RNA-seq)	Weight
ENSG00000120937	0.0650656
ENSG00000115163	0.057487
ENSG00000179542	0.0561221
ENSG00000100095	0.0542756
ENSG00000188536	0.0529618
ENSG00000171885	-0.0528202
ENSG00000145244	-0.052755
ENSG00000244734	0.0519904
ENSG00000184544	-0.0517829
ENSG00000259001	0.051393
ENSG00000120049	-0.0506455
ENSG00000156265	0.0493707
ENSG00000225526	0.0483624
ENSG00000175206	0.0481037
ENSG00000236958	0.047564
ENSG00000202198	0.0474474
ENSG00000251705	0.0458091
ENSG00000170162	0.0455402
ENSG00000206172	0.044981
ENSG00000134240	-0.0448902
ENSG00000265356	-0.0438703
ENSG00000269900	0.0428036
ENSG00000106483	0.0419205
ENSG00000165449	0.0413937
ENSG00000253369	-0.0412171
ENSG00000198692	0.0408242
ENSG00000163082	-0.0406168
ENSG00000228812	0.0401617
ENSG00000129824	0.0399792
ENSG00000111249	0.0393743
ENSG00000099957	0.0393497
ENSG00000164283	0.0391194
ENSG00000124713	-0.038876
ENSG00000233485	0.0385244
ENSG00000138795	0.038498
ENSG00000137968	0.0384941
ENSG00000114374	0.038286
ENSG00000147041	0.0381051
ENSG00000197299	-0.0379706
ENSG00000139767	0.0373198
ENSG00000227051	0.037135
ENSG00000078725	0.0369203
ENSG00000100206	0.0368767
ENSG00000175356	0.0368146
ENSG00000258486	0.036754
ENSG00000107623	0.0361122
ENSG00000197616	-0.0360597
ENSG00000234665	-0.0359793
ENSG00000267577	0.0355986
ENSG00000158023	0.0355649
ENSG00000164879	0.0355648
ENSG00000154277	0.0354543
ENSG00000246985	0.0347042
ENSG00000181195	0.0344755
ENSG00000118298	-0.0343788
ENSG00000260484	-0.0343661
ENSG00000241781	0.0342823
ENSG00000237624	0.0339031
ENSG00000164694	0.033821
ENSG00000184348	0.033783
ENSG00000007908	-0.0337152
ENSG00000130222	0.0336439
ENSG00000173114	-0.0335881
ENSG00000121005	0.0334963
ENSG00000148677	0.033464
ENSG00000138755	0.0334145
ENSG00000150551	0.0331423
ENSG00000142748	-0.032979
ENSG00000240045	0.0327927
ENSG00000019169	-0.0327169
ENSG00000170369	0.0326341
ENSG00000170549	0.0323654
ENSG00000114279	-0.0323454
ENSG00000173432	-0.0322099
ENSG00000017373	0.0320907
ENSG00000101608	0.0320732
ENSG00000008394	-0.0318726
ENSG00000124253	-0.0317124
ENSG00000167772	-0.0313817
ENSG00000188257	-0.0313701
ENSG00000067048	0.0313553
ENSG00000232110	0.0313117
ENSG00000232002	-0.0312506
ENSG00000175699	0.0311941
ENSG00000205795	0.0311844
ENSG00000145681	0.0310759
ENSG00000232480	0.0310583
ENSG00000164220	0.0309427
ENSG00000222414	0.0306016
ENSG00000157404	0.0305371
ENSG00000073670	-0.0305171
ENSG00000154096	0.0305114
ENSG00000229694	0.0304168
ENSG00000016402	-0.0304166
ENSG00000182177	0.0302552
ENSG00000144893	0.030221
ENSG00000198768	0.0302173
ENSG00000229807	-0.0302015
ENSG00000174697	-0.0300602
ENSG00000265150	0.0300037
ENSG00000164418	-0.0299305
ENSG00000164509	0.0299047
ENSG00000156475	0.0298763
ENSG00000237686	0.0297198
ENSG00000140557	0.0297174
ENSG00000188897	0.029644
ENSG00000152527	0.0294007
ENSG00000122641	0.0293892
ENSG00000229221	0.0293593
ENSG00000128045	0.0293308
ENSG00000186231	-0.0292953
ENSG00000115290	-0.0292809
ENSG00000171476	-0.0291997
ENSG00000016391	-0.0291832
ENSG00000182379	0.0291354
ENSG00000140459	0.0290765
ENSG00000181631	0.028974
ENSG00000198734	-0.0288172
ENSG00000134709	-0.02874
ENSG00000139289	0.0287266
ENSG00000138207	-0.0286694
ENSG00000162998	0.0285736
ENSG00000270066	0.0285034
ENSG00000133107	-0.0284831
ENSG00000130037	0.0284024
ENSG00000183615	-0.0283661
ENSG00000214900	0.0283357
ENSG00000091137	0.0281884
ENSG00000233864	0.0281301
ENSG00000118523	0.0281269
ENSG00000108691	-0.0280505
ENSG00000133794	-0.0280381
ENSG00000185565	-0.0280237
ENSG00000151365	-0.0279987
ENSG00000200434	0.0279225
ENSG00000214401	0.0278026
ENSG00000135472	-0.0278
ENSG00000239002	0.0277805
ENSG00000178772	0.0277168
ENSG00000181092	-0.0276544
ENSG00000229116	0.0275998
ENSG00000132326	0.0275676
ENSG00000272323	0.0275558
ENSG00000232352	0.0275396
ENSG00000227082	0.0275169
ENSG00000154080	-0.0274599
ENSG00000092969	0.0273923
ENSG00000124772	-0.0273897
ENSG00000039537	-0.0273779
ENSG00000092529	0.0272907
ENSG00000237463	0.0271811
ENSG00000106631	0.0271776
ENSG00000110492	0.0270507
ENSG00000106236	-0.0270329
ENSG00000184674	0.0268907
ENSG00000211896	-0.0268465
ENSG00000263874	0.0268394
ENSG00000134121	-0.0268199
ENSG00000124882	-0.0267558
ENSG00000152086	-0.0266789
ENSG00000076826	-0.0265878
ENSG00000057657	0.02653
ENSG00000124343	0.0264682
ENSG00000112280	0.0264519
ENSG00000138587	0.0264486
ENSG00000143167	0.0263899
ENSG00000143768	0.0263825
ENSG00000101892	0.0263599
ENSG00000258708	0.0262869
ENSG00000180440	-0.026272
ENSG00000012817	0.0261811
ENSG00000158859	-0.0261457
ENSG00000261342	-0.0260768
ENSG00000170439	-0.0260701
ENSG00000234028	0.0260691
ENSG00000171101	0.0260618
ENSG00000157734	-0.0260203
ENSG00000225938	0.0259469
ENSG00000266469	0.0258853
ENSG00000255020	0.0258167
ENSG00000148377	0.025715
ENSG00000152939	-0.0255961
ENSG00000090530	0.0255465
ENSG00000153446	0.0255017
ENSG00000224536	0.0254961
ENSG00000161509	0.0254638
ENSG00000120051	0.0254529
ENSG00000170561	0.0253738
ENSG00000138193	0.0252952
ENSG00000157429	0.0252744
ENSG00000184194	0.0252718
ENSG00000101825	0.0252678
ENSG00000230102	0.0252099
ENSG00000131002	0.025175
ENSG00000171303	-0.0250478
ENSG00000126803	0.0250057
ENSG00000202538	0.0250034
ENSG00000197444	0.0249964
ENSG00000158481	0.0249712
ENSG00000007062	0.0249429
ENSG00000180730	0.0249142
ENSG00000132681	0.0249107
ENSG00000162009	-0.0249062
ENSG00000138622	-0.0248513
ENSG00000186310	0.0248399
ENSG00000105374	0.0248182
ENSG00000158008	0.0247832
ENSG00000130513	0.0247628
ENSG00000167964	0.0247004
ENSG00000103316	0.0246761
ENSG00000067601	0.0245953
ENSG00000125675	0.0245604
ENSG00000111664	0.0245599
ENSG00000129450	-0.0245458
ENSG00000176728	0.0244964
ENSG00000179133	0.0244885
ENSG00000087076	0.0244866
ENSG00000257150	0.0244862
ENSG00000196549	0.024477
ENSG00000270607	0.0244458
ENSG00000179639	0.024421
ENSG00000125730	-0.0243989
ENSG00000249816	-0.0242909
ENSG00000140519	0.0241763
ENSG00000210107	-0.0241446
ENSG00000236714	-0.0240246
ENSG00000229666	0.0239743
ENSG00000231013	0.0239573
ENSG00000166819	-0.0238958
ENSG00000115085	0.0238808
ENSG00000186493	0.0238482
ENSG00000138356	-0.0236085
ENSG00000233117	0.0236006
ENSG00000168619	0.0235604
ENSG00000184557	-0.0235338
ENSG00000250878	0.023442
ENSG00000099194	-0.0233814
ENSG00000165929	-0.0233787
ENSG00000159640	0.0233691
ENSG00000169436	0.0233418
ENSG00000090920	-0.0233398
ENSG00000171345	-0.0233262
ENSG00000254636	0.0233134
ENSG00000175820	0.0232828
ENSG00000236581	0.0232784
ENSG00000139329	0.023276
ENSG00000273145	0.0232737
ENSG00000211893	-0.0232718
ENSG00000213694	-0.023271
ENSG00000271833	0.0232628
ENSG00000078098	0.0232236
ENSG00000135454	0.0231387
ENSG00000206561	0.0231267
ENSG00000133110	0.0231267
ENSG00000218018	0.0231022
ENSG00000149633	0.0230887
ENSG00000263155	-0.0230885
ENSG00000157103	0.0230775
ENSG00000260947	0.0230099
ENSG00000112562	0.0229836
ENSG00000160469	0.0228572
ENSG00000170579	0.0228468
ENSG00000261195	0.0228024
ENSG00000267385	-0.022793
ENSG00000188488	-0.0227915
ENSG00000006071	0.0227559
ENSG00000168329	0.0227511
ENSG00000152767	0.0227266
ENSG00000110400	-0.0227264
ENSG00000187288	-0.0226441
ENSG00000250392	0.0226237
ENSG00000109265	0.0225983
ENSG00000258940	0.0225879
ENSG00000019505	-0.0225807
ENSG00000171462	0.0225479
ENSG00000130700	-0.0225289
ENSG00000226026	0.0225179
ENSG00000224020	0.0225108
ENSG00000166428	0.0224986
ENSG00000137959	0.0224661
ENSG00000198963	-0.0224496
ENSG00000241556	-0.0223561
ENSG00000189350	-0.0223527
ENSG00000210144	-0.0223432
ENSG00000203734	0.0223228
ENSG00000250775	0.0223204
ENSG00000224689	0.0222587
ENSG00000162595	-0.0222573
ENSG00000258274	0.0222478
ENSG00000272899	0.0222185
ENSG00000078018	0.0222048
ENSG00000103021	0.0222026
ENSG00000223638	0.0221953
ENSG00000143595	0.0221811
ENSG00000184672	-0.022168
ENSG00000237742	-0.0221425
ENSG00000260572	0.0221287
ENSG00000089199	-0.0220977
ENSG00000253552	-0.0220566
ENSG00000226833	0.0220292
ENSG00000205771	0.0220258
ENSG00000273001	0.0219539
ENSG00000136960	0.0219533
ENSG00000067646	0.0219156
ENSG00000245849	0.0219117
ENSG00000171502	0.021906
ENSG00000136928	-0.0219024
ENSG00000157578	0.0218832
ENSG00000164089	-0.0218792
ENSG00000270021	0.0218665
ENSG00000112077	-0.0218369
ENSG00000172828	-0.0218351
ENSG00000187773	0.0218238
ENSG00000082196	0.0218156
ENSG00000235505	0.0217951
ENSG00000145335	0.0217882
ENSG00000064886	-0.0217722
ENSG00000180660	0.0217712
ENSG00000171766	0.021771
ENSG00000255146	0.0217654
ENSG00000138311	0.0217504
ENSG00000246528	0.0217233
ENSG00000033122	-0.0216962
ENSG00000253837	-0.0216909
ENSG00000153233	0.0216879
ENSG00000170891	0.0216671
ENSG00000156414	-0.0216352
ENSG00000266304	0.02159
ENSG00000163220	-0.0215666
ENSG00000186496	0.0215473
ENSG00000116690	0.0215216
ENSG00000096968	0.0214537
ENSG00000213963	0.0214511
ENSG00000246100	0.0214205
ENSG00000259520	0.0213977
ENSG00000255504	0.0213797
ENSG00000273259	-0.021377
ENSG00000113645	-0.0213728
ENSG00000168993	0.0213709
ENSG00000162494	0.0213515
ENSG00000179136	0.0213409
ENSG00000049246	0.0212961
ENSG00000235652	0.0212788
ENSG00000273486	0.0212711
ENSG00000267206	-0.0212708
ENSG00000241764	0.0212646
ENSG00000115828	0.0212604
ENSG00000108405	0.0212568
ENSG00000235295	0.0212526
ENSG00000259687	0.021233
ENSG00000176697	0.0212088
ENSG00000243742	0.0211953
ENSG00000267279	0.0211719
ENSG00000159208	0.0211607
ENSG00000111913	0.0211479
ENSG00000135426	0.0211174
ENSG00000145779	-0.0211141
ENSG00000185761	0.0210737
ENSG00000226853	0.0210712
ENSG00000124479	0.0210395
ENSG00000272715	0.0210395
ENSG00000228265	0.021032
ENSG00000169126	0.0210298
ENSG00000118292	0.0210207
ENSG00000145736	-0.0210095
ENSG00000144406	0.0209833
ENSG00000134594	0.0209704
ENSG00000227825	-0.0209588
ENSG00000163739	-0.0209582
ENSG00000211890	-0.0209463
ENSG00000137331	0.0209187
ENSG00000075886	-0.0209151
ENSG00000182107	0.0209087
ENSG00000163406	-0.0209003
ENSG00000175164	0.0208965
ENSG00000224165	0.0208921
ENSG00000198797	-0.020876
ENSG00000105048	0.0208104
ENSG00000234719	0.0208022
ENSG00000185669	-0.0207702
ENSG00000260023	0.0207642
ENSG00000260317	0.0207494
ENSG00000165478	-0.0207337
ENSG00000154027	0.0207335
ENSG00000081803	-0.0207024
ENSG00000189136	0.0207009
ENSG00000106624	0.0206981
ENSG00000143546	-0.0206953
ENSG00000177465	0.0206906
ENSG00000261253	-0.0206893
ENSG00000198830	0.0206667
ENSG00000135919	0.0206514
ENSG00000241135	-0.0206373
ENSG00000270346	-0.020625
ENSG00000118777	0.0205761
ENSG00000260625	0.0205741
ENSG00000166473	0.0205287
ENSG00000271324	0.0205247
ENSG00000152128	0.020498
ENSG00000230772	0.0204924
ENSG00000226696	0.0204529
ENSG00000253395	0.0203949
ENSG00000159212	0.0203899
ENSG00000116396	0.0203851
ENSG00000261115	-0.0203814
ENSG00000248599	0.0203502
ENSG00000169181	0.0203362
ENSG00000175874	0.020325
ENSG00000170807	0.0203235
ENSG00000167703	0.0203077
ENSG00000196353	-0.0202903
ENSG00000204282	0.0202876
ENSG00000188687	0.0202566
ENSG00000089356	-0.0202009
ENSG00000198517	0.0201944
ENSG00000158014	0.0201859
ENSG00000099984	-0.0201799
ENSG00000273148	0.0201666
ENSG00000263053	0.0201442
ENSG00000256540	-0.0201316
ENSG00000132915	0.0201282
ENSG00000272030	0.0201277
ENSG00000265542	-0.0201257
ENSG00000235205	0.0201019
ENSG00000237807	-0.0200579
ENSG00000273295	0.0200389
ENSG00000236682	0.020021
ENSG00000238741	0.0200153
ENSG00000147003	0.0199629
ENSG00000163040	0.0199619
ENSG00000164532	-0.0199567
ENSG00000261713	-0.019956
ENSG00000264868	-0.0199351
ENSG00000163273	-0.0199206
ENSG00000102924	0.0199181
ENSG00000105270	0.0199142
ENSG00000125869	0.0198527
ENSG00000179294	0.0198258
ENSG00000233622	0.019823
ENSG00000165623	0.0198226
ENSG00000103569	-0.0198157
ENSG00000101144	-0.0198149
ENSG00000050438	0.0198088
ENSG00000144619	0.019807
ENSG00000159387	0.0198008
ENSG00000172458	0.0197973
ENSG00000197992	0.019778
ENSG00000175894	-0.0197758
ENSG00000160862	-0.0197727
ENSG00000215375	0.019762
ENSG00000144285	-0.0196957
ENSG00000078053	0.0196942
ENSG00000228436	0.0196895
ENSG00000184661	-0.0196868
ENSG00000211448	0.0196859
ENSG00000124243	0.019678
ENSG00000139438	-0.0196647
ENSG00000157601	0.0196144
ENSG00000107014	0.0196078
ENSG00000253320	0.0196065
ENSG00000103528	0.0195875
ENSG00000197191	0.0195842
ENSG00000111452	-0.0195586
ENSG00000220848	0.0195341
ENSG00000122176	0.0195281
ENSG00000258920	0.0195249
ENSG00000183682	0.0195114
ENSG00000235349	0.0194992
ENSG00000204136	0.0194924
ENSG00000184925	0.019492
ENSG00000163235	-0.0194785
ENSG00000150281	0.0194684
ENSG00000105894	0.019457
ENSG00000135917	-0.0194566
ENSG00000175175	-0.0194285
ENSG00000206538	-0.019418
ENSG00000228798	0.0193933
ENSG00000259556	0.0193689
ENSG00000123689	-0.0193677
ENSG00000229828	0.0193146
ENSG00000165490	-0.0192907
ENSG00000139364	-0.0192686
ENSG00000106366	0.0192313
ENSG00000148848	-0.0192258
ENSG00000084674	-0.0191803
ENSG00000104883	0.0191794
ENSG00000165548	-0.0191626
ENSG00000185847	0.0191618
ENSG00000237310	0.0191335
ENSG00000137825	-0.0191133
ENSG00000135643	0.0191123
ENSG00000270112	0.0190901
ENSG00000272198	0.0190566
ENSG00000248174	0.019039
ENSG00000087495	-0.0190251
ENSG00000223784	0.0190236
ENSG00000172156	-0.0190204
ENSG00000197971	0.0189908
ENSG00000229644	-0.0189857
ENSG00000271826	0.0189757
ENSG00000133317	-0.0189728
ENSG00000272944	0.0189693
ENSG00000224699	0.0189593
ENSG00000243466	-0.0189571
ENSG00000147255	0.0189568
ENSG00000235904	0.0189398
ENSG00000272009	0.0189394
ENSG00000198542	0.0189336
ENSG00000237512	0.0189149
ENSG00000169245	0.0189047
ENSG00000140090	-0.0188975
ENSG00000263335	0.018893
ENSG00000150667	0.0188911
ENSG00000268816	0.0188832
ENSG00000162383	0.0188524
ENSG00000272168	0.0188465
ENSG00000181104	0.018842
ENSG00000121957	-0.0188419
ENSG00000156466	0.0188409
ENSG00000188825	0.0188124
ENSG00000114646	0.0187976
ENSG00000115641	-0.0187732
ENSG00000130203	0.0187703
ENSG00000091844	0.018766
ENSG00000119650	0.0187624
ENSG00000152822	0.0187609
ENSG00000232995	0.0187601
ENSG00000101187	-0.0187524
ENSG00000224358	0.0187474
ENSG00000184588	-0.0187314
ENSG00000184564	-0.0187272
ENSG00000177409	0.0187157
ENSG00000184811	-0.0187141
ENSG00000272010	0.0187081
ENSG00000153904	0.0186944
ENSG00000267381	0.0186871
ENSG00000204584	0.0186839
ENSG00000106819	0.0186796
ENSG00000164841	0.0186634
ENSG00000269194	0.0186532
ENSG00000116254	0.0186482
ENSG00000221944	0.0186198
ENSG00000166106	-0.0186059
ENSG00000244227	0.0186057
ENSG00000224397	-0.0186009
ENSG00000179523	0.0185832
ENSG00000229715	0.0185712
ENSG00000271918	0.0185708
ENSG00000254718	0.0185589
ENSG00000108018	-0.0185569
ENSG00000138379	0.0185526
ENSG00000146592	0.0185389
ENSG00000179083	0.0185369
ENSG00000125966	0.0185281
ENSG00000161570	0.0185118
ENSG00000152377	-0.0185069
ENSG00000166257	0.0185022
ENSG00000120324	0.0184877
ENSG00000233098	0.018478
ENSG00000166922	0.0184762
ENSG00000268913	0.0184644
ENSG00000235663	0.0184534
ENSG00000122877	0.0184513
ENSG00000187608	0.0184426
ENSG00000254387	0.0184353
ENSG00000262580	0.0184272
ENSG00000149809	0.018407
ENSG00000156096	-0.0183799
ENSG00000118156	0.0183783
ENSG00000021300	0.018378
ENSG00000272195	0.0183583
ENSG00000246223	-0.0183491
ENSG00000189292	0.0183464
ENSG00000182132	0.0183254
ENSG00000166317	0.0183095
ENSG00000183287	0.0182946
ENSG00000226094	0.0182728
ENSG00000225648	0.0182524
ENSG00000152726	0.0182416
ENSG00000112182	0.0182213
ENSG00000186466	-0.0182199
ENSG00000130234	0.0181652
ENSG00000065923	-0.0181393
ENSG00000254682	0.0180998
ENSG00000164270	0.018081
ENSG00000133818	0.0180608
ENSG00000258603	0.0180451
ENSG00000173227	0.0180332
ENSG00000258949	0.0180207
ENSG00000197165	0.0180168
ENSG00000164106	0.0180143
ENSG00000156471	-0.018006
ENSG00000150471	0.018004
ENSG00000123572	0.0180039
ENSG00000188707	0.0179957
ENSG00000261324	0.0179955
ENSG00000131080	0.0179725
ENSG00000100068	0.0179712
ENSG00000227544	0.0179567
ENSG00000183454	-0.0179552
ENSG00000137878	-0.0179385
ENSG00000078549	-0.0179373
ENSG00000201098	0.0179369
ENSG00000006327	0.0179133
ENSG00000185641	0.0179003
ENSG00000198597	0.017882
ENSG00000173868	0.0178723
ENSG00000137880	-0.0178699
ENSG00000260604	0.017865
ENSG00000213190	0.0178622
ENSG00000225889	0.0178481
ENSG00000156535	-0.0178466
ENSG00000142973	-0.0178423
ENSG00000180015	-0.0178286
ENSG00000226958	0.0178228
ENSG00000164308	0.0177928
ENSG00000107518	0.0177788
ENSG00000230587	0.017777
ENSG00000143816	0.0177758
ENSG00000260526	0.0177532
ENSG00000072274	-0.0177532
ENSG00000107968	-0.0177466
ENSG00000099725	0.0177329
ENSG00000111907	0.0177295
ENSG00000143994	0.017725
ENSG00000163092	0.0177097
ENSG00000244625	0.0177048
ENSG00000230513	0.0176985
ENSG00000163687	0.0176909
ENSG00000138378	0.0176907
ENSG00000168824	-0.0176867
ENSG00000232600	0.0176785
ENSG00000237973	-0.0176623
ENSG00000166153	0.0176495
ENSG00000259863	0.017645
ENSG00000231999	0.0176335
ENSG00000128965	0.0176304
ENSG00000212232	0.0176271
ENSG00000170837	0.0176255
ENSG00000163704	0.0175966
ENSG00000175352	0.0175936
ENSG00000171791	0.0175925
ENSG00000225062	0.0175887
ENSG00000179399	-0.0175836
ENSG00000162461	-0.017578
ENSG00000160883	-0.0175625
ENSG00000164932	0.0175477
ENSG00000140104	0.0175465
ENSG00000132821	-0.0175442
ENSG00000102287	0.0175433
ENSG00000116039	0.0175424
ENSG00000187672	0.0175408
ENSG00000157514	0.0175256
ENSG00000125398	0.0175126
ENSG00000134716	0.0175124
ENSG00000080644	0.0175082
ENSG00000134201	0.0175058
ENSG00000100100	0.0175007
ENSG00000249087	0.0174972
ENSG00000183878	0.0174968
ENSG00000234160	0.0174943
ENSG00000174938	0.0174799
ENSG00000232611	0.017478
ENSG00000167554	0.0174693
ENSG00000216895	0.0174619
ENSG00000272086	0.0174618
ENSG00000118849	-0.0174537
ENSG00000113396	0.0174428
ENSG00000224729	0.0174301
ENSG00000138316	0.017428
ENSG00000113389	0.0174277
ENSG00000056736	-0.017425
ENSG00000182557	0.0173873
ENSG00000164591	0.0173738
ENSG00000130201	0.0173554
ENSG00000196275	0.0173552
ENSG00000204381	0.0173531
ENSG00000226200	0.0173325
ENSG00000236751	0.017323
ENSG00000172322	-0.0173163
ENSG00000179300	0.0172977
ENSG00000172748	0.0172934
ENSG00000116985	0.0172801
ENSG00000143632	0.017254
ENSG00000245317	0.0172501
ENSG00000233429	-0.0172393
ENSG00000111087	0.0172381
ENSG00000147231	0.0172346
ENSG00000150625	0.0172318
ENSG00000272941	0.0172223
ENSG00000141314	-0.017219
ENSG00000196754	0.0172134
ENSG00000267811	0.0172103
ENSG00000135116	0.017197
ENSG00000188086	0.017188
ENSG00000182791	0.0171861
ENSG00000047578	0.0171707
ENSG00000143353	0.0171673
ENSG00000134602	-0.017125
ENSG00000188338	0.0171197
ENSG00000165694	-0.0171135
ENSG00000168952	-0.0171008
ENSG00000179636	-0.0170947
ENSG00000169385	-0.0170938
ENSG00000182397	0.0170833
ENSG00000262222	0.0170582
ENSG00000005243	0.0170523
ENSG00000229931	0.0170478
ENSG00000013588	-0.0170473
ENSG00000076344	0.0170393
ENSG00000175832	0.0170274
ENSG00000186354	-0.0170104
ENSG00000165197	-0.0170043
ENSG00000257242	0.0169877
ENSG00000266066	-0.0169865
ENSG00000139410	0.016961
ENSG00000269821	0.0169583
ENSG00000113805	-0.0169545
ENSG00000225649	0.0169507
ENSG00000171970	0.0169453
ENSG00000184838	0.0169377
ENSG00000101440	0.01692
ENSG00000230084	0.016913
ENSG00000264462	-0.0169014
ENSG00000230438	0.016888
ENSG00000101251	0.016866
ENSG00000150275	0.0168642
ENSG00000251602	0.0168635
ENSG00000113369	0.0168437
ENSG00000237187	0.0168402
ENSG00000255182	0.0168344
ENSG00000225383	0.0168201
ENSG00000213402	0.0168164
ENSG00000101104	0.0168042
ENSG00000131470	0.0167913
ENSG00000113296	0.0167886
ENSG00000160999	-0.0167816
ENSG00000246430	0.0167686
ENSG00000162975	0.0167606
ENSG00000171819	0.0167593
ENSG00000251867	0.0167592
ENSG00000237350	-0.0167548
ENSG00000149599	0.0167409
ENSG00000101134	0.0167042
ENSG00000222041	0.0166924
ENSG00000130595	0.0166878
ENSG00000213760	0.0166839
ENSG00000074047	0.0166782
ENSG00000262155	0.0166756
ENSG00000177791	0.0166682
ENSG00000168734	0.0166652
ENSG00000180999	-0.0166635
ENSG00000273142	0.0166573
ENSG00000185559	-0.0166563
ENSG00000131620	0.0166557
ENSG00000261054	0.0166449
ENSG00000203999	0.0166422
ENSG00000008516	0.0166365
ENSG00000172965	0.0166323
ENSG00000136514	0.0166295
ENSG00000111245	0.0166263
ENSG00000197991	-0.0166168
ENSG00000132688	0.0166155
ENSG00000162630	-0.0166054
ENSG00000165246	0.0166035
ENSG00000103269	0.0165993
ENSG00000163898	0.01659
ENSG00000211897	-0.0165771
ENSG00000260027	-0.016566
ENSG00000004776	0.0165555
ENSG00000182771	0.0165488
ENSG00000266053	0.0165488
ENSG00000000005	0.0165468
ENSG00000113494	-0.0165456
ENSG00000119508	-0.016545
ENSG00000254552	0.016536
ENSG00000164972	0.0165011
ENSG00000172578	0.0164927
ENSG00000228506	0.0164912
ENSG00000140853	0.0164873
ENSG00000177570	0.0164781
ENSG00000110092	0.0164642
ENSG00000211934	-0.0164578
ENSG00000255458	0.0164543
ENSG00000115107	-0.0164505
ENSG00000178386	0.0164466
ENSG00000162706	-0.0164435
ENSG00000137501	0.0164098
ENSG00000185924	-0.016408
ENSG00000118971	0.0163916
ENSG00000272143	0.0163857
ENSG00000171657	0.0163848
ENSG00000091831	0.0163588
ENSG00000247134	0.0163465
ENSG00000260918	0.0163453
ENSG00000270820	0.0163378
ENSG00000106077	0.0163264
ENSG00000188176	-0.0163253
ENSG00000182255	0.0163211
ENSG00000263096	-0.016319
ENSG00000149328	-0.0163084
ENSG00000183569	0.0162958
ENSG00000064201	0.0162861
ENSG00000159871	-0.0162833
ENSG00000127083	0.0162829
ENSG00000177144	-0.0162826
ENSG00000155011	0.0162816
ENSG00000177354	0.0162754
ENSG00000160867	-0.0162677
ENSG00000259480	-0.0162595
ENSG00000158104	-0.0162545
ENSG00000115468	0.0162489
ENSG00000183186	-0.0162406
ENSG00000174469	0.0162339
ENSG00000272221	0.0162247
ENSG00000198932	0.0162237
ENSG00000127241	0.0162095
ENSG00000236208	0.0162047
ENSG00000134824	0.0162029
ENSG00000005513	0.0161763
ENSG00000086717	-0.0161708
ENSG00000261787	-0.0161513
ENSG00000203288	0.0161505
ENSG00000143194	0.0161499
ENSG00000143320	0.0161495
ENSG00000255967	-0.0161479
ENSG00000265485	0.0161331
ENSG00000185697	0.016125
ENSG00000128655	-0.0161196
ENSG00000054938	-0.0161103
ENSG00000183196	0.0161093
ENSG00000204228	0.0161036
ENSG00000105122	0.0160988
ENSG00000249846	0.016098
ENSG00000115361	0.0160876
ENSG00000204644	-0.0160821
ENSG00000204947	0.0160775
ENSG00000210049	0.0160679
ENSG00000117586	-0.0160575
ENSG00000273382	0.016054
ENSG00000266903	-0.0160515
ENSG00000179954	0.0160458
ENSG00000122733	0.016043
ENSG00000133985	0.0160232
ENSG00000255248	0.0160127
ENSG00000226686	0.0159685
ENSG00000259728	0.0159605
ENSG00000115758	0.0159565
ENSG00000189056	-0.0159476
ENSG00000198785	-0.0159413
ENSG00000222040	0.0159257
ENSG00000272841	0.015919
ENSG00000067445	0.0159
ENSG00000104413	0.0158986
ENSG00000260136	0.01589
ENSG00000047849	0.0158846
ENSG00000200087	0.0158843
ENSG00000126709	0.015877
ENSG00000134917	0.0158744
ENSG00000198033	-0.0158676
ENSG00000172508	0.0158589
ENSG00000196358	0.0158448
ENSG00000136689	-0.0158372
ENSG00000250327	0.0158091
ENSG00000181350	0.0158015
ENSG00000205084	0.0158003
ENSG00000176597	0.0157953
ENSG00000174437	-0.0157849
ENSG00000108641	0.0157835
ENSG00000198088	0.0157709
ENSG00000228274	0.0157695
ENSG00000272016	0.0157568
ENSG00000171160	0.0157488
ENSG00000162882	0.0157432
ENSG00000124491	-0.0157349
ENSG00000112137	-0.0157285
ENSG00000182916	0.0157264
ENSG00000169306	-0.0157256
ENSG00000186827	0.0157204
ENSG00000079931	0.0156968
ENSG00000135547	-0.0156864
ENSG00000168032	0.0156842
ENSG00000251022	0.0156794
ENSG00000182103	0.0156687
ENSG00000236144	0.0156647
ENSG00000236404	0.0156583
ENSG00000264063	-0.0156526
ENSG00000235162	0.015652
ENSG00000163630	0.0156519
ENSG00000166482	0.0156409
ENSG00000182732	0.0156354
ENSG00000004777	0.0156063
ENSG00000118785	-0.0155924
ENSG00000041982	0.015588
ENSG00000174501	0.0155863
ENSG00000272913	0.0155818
ENSG00000197766	-0.0155784
ENSG00000233894	0.0155723
ENSG00000080031	0.0155712
ENSG00000151322	0.0155668
ENSG00000119737	0.0155604
ENSG00000106133	0.0155582
ENSG00000243024	0.0155523
ENSG00000183077	0.0155381
ENSG00000215246	0.0155361
ENSG00000116191	-0.0155247
ENSG00000268205	0.0155145
ENSG00000072422	0.0155128
ENSG00000115602	-0.0155044
ENSG00000205334	0.0154968
ENSG00000179715	0.0154661
ENSG00000120645	0.0154655
ENSG00000174326	0.0154484
ENSG00000115257	0.0154469
ENSG00000084636	0.0154394
ENSG00000140563	-0.0154256
ENSG00000130770	0.0154229
ENSG00000248927	0.0154209
ENSG00000236155	0.0154076
ENSG00000186162	0.0154049
ENSG00000146216	0.0153998
ENSG00000263740	0.015399
ENSG00000271737	0.0153986
ENSG00000183250	0.0153926
ENSG00000137821	0.015383
ENSG00000259882	0.0153788
ENSG00000251562	0.015374
ENSG00000254469	0.0153738
ENSG00000251247	0.0153419
ENSG00000129988	-0.0153419
ENSG00000260448	0.0153383
ENSG00000260977	-0.0153378
ENSG00000254703	-0.0153334
ENSG00000210154	0.0153306
ENSG00000162620	0.0153223
ENSG00000205038	-0.0153152
ENSG00000254109	0.0153114
ENSG00000263370	0.0152889
ENSG00000163083	0.0152884
ENSG00000105696	0.0152704
ENSG00000129991	0.0152692
ENSG00000232656	0.0152648
ENSG00000260018	0.0152529
ENSG00000179270	-0.0152525
ENSG00000162241	0.0152297
ENSG00000224420	0.0152168
ENSG00000250981	-0.0152086
ENSG00000247137	0.015208
ENSG00000175115	0.0152043
ENSG00000178462	-0.0152034
ENSG00000070193	-0.0152033
ENSG00000099365	0.0152013
ENSG00000169085	0.0151985
ENSG00000268433	0.0151919
ENSG00000178233	-0.0151908
ENSG00000204387	0.0151891
ENSG00000130173	-0.0151886
ENSG00000185436	-0.0151823
ENSG00000223561	0.0151806
ENSG00000128262	-0.0151774
ENSG00000163046	-0.0151663
ENSG00000263809	0.0151658
ENSG00000135914	0.0151623
ENSG00000231770	0.01515
ENSG00000164761	0.0151397
ENSG00000123453	0.0151391
ENSG00000259523	0.0151333
ENSG00000100505	0.0151246
ENSG00000145649	0.0151232
ENSG00000158486	-0.0151214
ENSG00000234690	0.015107
ENSG00000271538	0.0151058
ENSG00000214194	0.015098
ENSG00000167646	0.0150949
ENSG00000159784	-0.0150934
ENSG00000198842	0.0150863
ENSG00000261664	0.0150849
ENSG00000089091	0.0150692
ENSG00000196843	0.0150613
ENSG00000224424	0.0150595
ENSG00000160307	-0.0150553
ENSG00000054277	-0.0150549
ENSG00000151746	0.0150499
ENSG00000170382	0.0150463
ENSG00000204580	0.0150384
ENSG00000165917	0.0150363
ENSG00000233585	-0.0150114
ENSG00000265096	0.0150089
ENSG00000081791	0.0149917
ENSG00000119681	0.0149905
ENSG00000107165	0.0149897
ENSG00000094804	-0.0149824
ENSG00000151892	-0.01498
ENSG00000148600	-0.0149781
ENSG00000155066	0.0149639
ENSG00000223768	0.0149618
ENSG00000236548	0.0149528
ENSG00000259877	0.0149526
ENSG00000051341	-0.0149506
ENSG00000243679	0.0149485
ENSG00000269609	0.014946
ENSG00000246339	0.0149313
ENSG00000197561	-0.0149303
ENSG00000089847	0.0149155
ENSG00000181649	-0.0149145
ENSG00000133878	0.014914
ENSG00000133048	-0.0148956
ENSG00000255310	0.0148929
ENSG00000074621	0.0148815
ENSG00000165511	0.0148749
ENSG00000100170	-0.0148437
ENSG00000135077	-0.0148398
ENSG00000270959	0.0148397
ENSG00000134070	0.0148149
ENSG00000244055	0.0148028
ENSG00000256525	0.0147735
ENSG00000162650	0.0147724
ENSG00000134762	-0.0147599
ENSG00000153714	0.0147529
ENSG00000144834	0.0147519
ENSG00000251102	-0.0147509
ENSG00000171984	0.0147352
ENSG00000125740	-0.0147318
ENSG00000178776	0.014722
ENSG00000203546	0.0147209
ENSG00000245146	0.01471
ENSG00000115963	0.0147045
ENSG00000269155	0.0146888
ENSG00000255883	-0.0146848
ENSG00000234452	0.0146748
ENSG00000232931	0.0146651
ENSG00000246731	0.014658
ENSG00000170629	-0.0146571
ENSG00000270039	0.0146552
ENSG00000145675	0.0146515
ENSG00000169964	0.0146487
ENSG00000188153	0.014646
ENSG00000234664	0.0146157
ENSG00000079257	0.0146088
ENSG00000184254	0.0145896
ENSG00000159173	0.0145889
ENSG00000143127	0.0145884
ENSG00000264107	0.0145718
ENSG00000138180	-0.0145645
ENSG00000175445	0.0145552
ENSG00000102524	0.0145524
ENSG00000162997	0.0145523
ENSG00000257327	0.0145452
ENSG00000205871	0.0145443
ENSG00000230124	0.0145321
ENSG00000095319	0.0145292
ENSG00000174599	0.0145184
ENSG00000145365	-0.0145103
ENSG00000105963	0.014507
ENSG00000137054	0.0144944
ENSG00000137941	0.0144913
ENSG00000132321	0.0144873
ENSG00000238083	0.0144755
ENSG00000273329	0.0144659
ENSG00000104691	0.0144634
ENSG00000124602	0.0144624
ENSG00000163435	-0.014451
ENSG00000175264	0.0144492
ENSG00000138400	0.0144386
ENSG00000022267	0.0144386
ENSG00000223825	0.0144384
ENSG00000095303	-0.0144379
ENSG00000099974	-0.0144261
ENSG00000272540	0.0144063
ENSG00000181218	0.0144045
ENSG00000211892	-0.0144023
ENSG00000235257	0.014386
ENSG00000226944	0.0143645
ENSG00000107736	0.0143451
ENSG00000177410	0.0143437
ENSG00000229292	0.0143433
ENSG00000272769	-0.0143402
ENSG00000210196	-0.0143257
ENSG00000257261	0.0143236
ENSG00000204764	0.0143211
ENSG00000128596	0.01432
ENSG00000163624	-0.014313
ENSG00000239521	-0.0143128
ENSG00000007255	0.0143052
ENSG00000225614	0.0143031
ENSG00000133800	-0.0142955
ENSG00000112379	0.0142951
ENSG00000120738	0.0142907
ENSG00000266865	0.0142829
ENSG00000183671	0.0142672
ENSG00000124191	0.0142655
ENSG00000159685	0.0142652
ENSG00000115596	-0.0142626
ENSG00000123975	0.0142573
ENSG00000166707	0.0142563
ENSG00000070718	0.0142497
ENSG00000108821	0.0142419
ENSG00000065675	-0.0142416
ENSG00000073605	0.0142281
ENSG00000123505	-0.0142278
ENSG00000243926	0.014227
ENSG00000124875	-0.0142228
ENSG00000119125	-0.0142133
ENSG00000106823	0.0141987
ENSG00000179912	0.0141878
ENSG00000241570	0.0141873
ENSG00000116525	0.014185
ENSG00000162373	0.0141826
ENSG00000196502	0.0141817
ENSG00000258851	0.0141801
ENSG00000103154	0.0141725
ENSG00000162783	0.0141698
ENSG00000129194	0.0141678
ENSG00000146859	0.0141674
ENSG00000069712	0.0141607
ENSG00000144488	0.0141596
ENSG00000257511	0.0141556
ENSG00000240024	0.014141
ENSG00000260186	-0.0141358
ENSG00000213741	0.0141315
ENSG00000150045	0.0141279
ENSG00000204623	0.0141224
ENSG00000165312	0.0141169
ENSG00000235823	0.0141123
ENSG00000261372	0.0141039
ENSG00000150048	0.014103
ENSG00000231767	0.0140998
ENSG00000235655	0.0140966
ENSG00000223678	0.0140927
ENSG00000088826	0.014092
ENSG00000256667	0.0140889
ENSG00000260000	0.0140868
ENSG00000260065	-0.0140854
ENSG00000102452	-0.0140779
ENSG00000251429	0.0140747
ENSG00000203645	0.0140692
ENSG00000168135	0.014069
ENSG00000130592	0.014065
ENSG00000267127	0.0140533
ENSG00000260267	0.0140516
ENSG00000166148	-0.0140405
ENSG00000176531	0.0140389
ENSG00000169891	-0.0140223
ENSG00000270605	0.014022
ENSG00000168502	0.0140182
ENSG00000137343	0.0140141
ENSG00000223508	0.0140042
ENSG00000027869	-0.0139971
ENSG00000133874	-0.013987
ENSG00000183117	0.0139849
ENSG00000099958	0.013977
ENSG00000257815	0.0139721
ENSG00000152582	0.0139678
ENSG00000166523	0.0139659
ENSG00000171792	0.0139649
ENSG00000228624	0.0139616
ENSG00000179406	0.0139573
ENSG00000258311	-0.0139567
ENSG00000054690	-0.0139557
ENSG00000236423	-0.0139546
ENSG00000178562	-0.013949
ENSG00000140961	0.0139395
ENSG00000204655	-0.013937
ENSG00000251580	0.0139354
ENSG00000242358	0.013935
ENSG00000226471	0.0139311
ENSG00000248986	0.0139263
ENSG00000185437	0.0139224
ENSG00000216588	-0.0139212
ENSG00000225978	0.0139165
ENSG00000272079	0.0139114
ENSG00000258676	-0.0139066
ENSG00000164815	0.0139014
ENSG00000114812	0.0138974
ENSG00000230979	0.0138972
ENSG00000106714	-0.0138955
ENSG00000130208	0.013893
ENSG00000134333	-0.0138924
ENSG00000064300	-0.0138916
ENSG00000060558	-0.0138888
ENSG00000161381	0.0138814
ENSG00000270069	0.0138779
ENSG00000006534	0.0138751
ENSG00000105516	0.0138731
ENSG00000263731	0.0138666
ENSG00000175229	0.0138522
ENSG00000143549	0.0138438
ENSG00000186577	0.0138409
ENSG00000257122	0.0138386
ENSG00000144837	-0.0138364
ENSG00000113070	0.0138242
ENSG00000167083	-0.0138241
ENSG00000156222	0.0138212
ENSG00000255517	0.013808
ENSG00000136244	-0.0138061
ENSG00000136378	-0.0138053
ENSG00000059915	0.0137981
ENSG00000255103	-0.013792
ENSG00000074706	0.0137783
ENSG00000203875	0.0137774
ENSG00000065609	-0.0137752
ENSG00000125534	0.0137678
ENSG00000236719	0.0137658
ENSG00000137672	0.0137563
ENSG00000239467	0.0137479
ENSG00000171962	0.0137468
ENSG00000105643	0.0137456
ENSG00000132530	0.0137428
ENSG00000272821	0.0137411
ENSG00000154451	0.0137369
ENSG00000205221	-0.0137331
ENSG00000267583	0.0137311
ENSG00000213684	-0.0137197
ENSG00000006282	0.0137196
ENSG00000215513	0.0137195
ENSG00000234912	0.0137163
ENSG00000204950	0.0137161
ENSG00000136235	0.0137074
ENSG00000151131	0.0137063
ENSG00000182759	-0.013705
ENSG00000267683	0.0136999
ENSG00000119943	0.0136981
ENSG00000185839	-0.013695
ENSG00000079263	-0.0136918
ENSG00000182492	0.0136902
ENSG00000224389	-0.0136868
ENSG00000037280	0.0136845
ENSG00000198216	-0.0136774
ENSG00000272695	0.0136683
ENSG00000204540	0.0136674
ENSG00000166183	-0.0136671
ENSG00000214110	-0.0136663
ENSG00000245975	0.0136601
ENSG00000183513	0.0136462
ENSG00000272091	0.0136461
ENSG00000235381	0.0136426
ENSG00000122574	0.0136401
ENSG00000215845	0.013637
ENSG00000248713	-0.0136346
ENSG00000253210	0.0136336
ENSG00000222020	0.0136333
ENSG00000138346	0.013632
ENSG00000100987	0.0136318
ENSG00000267640	0.0136247
ENSG00000260807	0.0136206
ENSG00000171724	0.0136129
ENSG00000176386	0.0136088
ENSG00000100147	-0.0136079
ENSG00000183765	-0.0135923
ENSG00000124635	0.0135901
ENSG00000253731	-0.0135834
ENSG00000204334	0.0135694
ENSG00000052795	0.0135622
ENSG00000157214	-0.0135615
ENSG00000235703	0.0135522
ENSG00000105989	-0.0135486
ENSG00000154864	0.0135468
ENSG00000154175	0.0135437
ENSG00000160321	0.0135418
ENSG00000086991	0.0135406
ENSG00000235316	0.0135393
ENSG00000124813	0.0135344
ENSG00000186340	0.0135334
ENSG00000197948	0.0135243
ENSG00000008311	-0.0135231
ENSG00000154040	0.0135214
ENSG00000154721	0.013516
ENSG00000112936	-0.0135152
ENSG00000116717	0.0135144
ENSG00000270681	0.0135116
ENSG00000187626	0.0135053
ENSG00000262454	0.0134911
ENSG00000206159	0.013478
ENSG00000155096	0.013469
ENSG00000231113	-0.0134672
ENSG00000131095	0.0134645
ENSG00000140830	0.0134472
ENSG00000259972	0.0134433
ENSG00000182197	0.0134412
ENSG00000188523	-0.0134367
ENSG00000196284	0.0134314
ENSG00000115239	0.0134261
ENSG00000164300	-0.0134249
ENSG00000262686	0.0134204
ENSG00000102048	0.0134078
ENSG00000126773	0.013407
ENSG00000131386	-0.0134069
ENSG00000141622	0.0133937
ENSG00000105707	0.0133935
ENSG00000137573	0.013389
ENSG00000102053	0.0133878
ENSG00000156049	0.0133792
ENSG00000180573	0.0133691
ENSG00000024862	0.013368
ENSG00000173933	0.0133644
ENSG00000119632	0.0133633
ENSG00000145384	-0.0133591
ENSG00000197536	0.0133582
ENSG00000214748	0.0133561
ENSG00000188243	0.0133545
ENSG00000099977	0.0133477
ENSG00000099999	0.0133461
ENSG00000120057	-0.0133435
ENSG00000236740	0.0133387
ENSG00000164946	0.0133295
ENSG00000215527	0.0133283
ENSG00000054219	0.0133253
ENSG00000241684	0.0133151
ENSG00000070882	-0.0133128
ENSG00000169228	0.0133086
ENSG00000183597	0.0133079
ENSG00000178917	-0.0133065
ENSG00000217648	-0.013303
ENSG00000131401	0.0132989
ENSG00000204397	0.0132982
ENSG00000205485	0.0132981
ENSG00000108556	0.0132919
ENSG00000168453	0.0132896
ENSG00000235217	0.0132868
ENSG00000185220	0.0132761
ENSG00000226278	-0.0132677
ENSG00000231663	0.0132627
ENSG00000170390	0.0132596
ENSG00000180525	-0.0132584
ENSG00000166963	0.0132569
ENSG00000272734	0.0132428
ENSG00000204520	0.0132413
ENSG00000044524	0.0132326
ENSG00000175265	0.0132295
ENSG00000112164	-0.0132241
ENSG00000152092	0.013222
ENSG00000132465	-0.0132181
ENSG00000221817	0.0132168
ENSG00000145491	0.013212
ENSG00000124251	0.0132102
ENSG00000108278	0.0132095
ENSG00000107611	0.0132044
ENSG00000171017	-0.0131913
ENSG00000223396	0.0131893
ENSG00000124749	0.0131873
ENSG00000164530	0.013184
ENSG00000239951	-0.0131757
ENSG00000256618	0.0131743
ENSG00000260077	0.0131698
ENSG00000171864	0.0131668
ENSG00000049089	0.0131502
ENSG00000149575	0.0131352
ENSG00000105855	-0.0131275
ENSG00000244513	0.013119
ENSG00000227195	-0.0131175
ENSG00000205786	0.0131163
ENSG00000254141	0.0131044
ENSG00000261925	0.0131007
ENSG00000219626	0.0130877
ENSG00000175785	-0.0130853
ENSG00000135480	-0.0130835
ENSG00000204420	0.0130715
ENSG00000247950	0.0130675
ENSG00000267365	0.0130658
ENSG00000187068	0.013062
ENSG00000099860	0.0130498
ENSG00000097046	-0.0130466
ENSG00000215440	0.0130441
ENSG00000145708	0.0130381
ENSG00000168273	0.0130339
ENSG00000018280	-0.0130286
ENSG00000189171	0.0130219
ENSG00000136250	0.0130154
ENSG00000167244	0.0130132
ENSG00000115523	0.0130131
ENSG00000116981	0.013011
ENSG00000187955	0.0130099
ENSG00000174407	0.0130071
ENSG00000164604	0.0130031
ENSG00000125611	0.0129959
ENSG00000137691	0.0129949
ENSG00000167723	0.0129946
ENSG00000180801	0.0129889
ENSG00000187116	-0.0129781
ENSG00000169604	0.0129751
ENSG00000146555	-0.0129644
ENSG00000260400	0.0129626
ENSG00000162711	0.0129625
ENSG00000260658	0.012948
ENSG00000166033	0.0129468
ENSG00000206052	0.0129432
ENSG00000260404	0.0129387
ENSG00000257800	0.0129383
ENSG00000142207	0.0129351
ENSG00000130032	0.0129346
ENSG00000109452	0.0129323
ENSG00000214199	0.0129303
ENSG00000101457	0.0129278
ENSG00000172057	0.0129212
ENSG00000204305	0.0129182
ENSG00000141744	-0.0129119
ENSG00000176438	-0.012909
ENSG00000105664	0.0128945
ENSG00000263006	0.0128923
ENSG00000213722	0.012892
ENSG00000109771	-0.0128901
ENSG00000214087	0.0128858
ENSG00000105383	0.0128821
ENSG00000010219	0.0128789
ENSG00000185614	0.0128775
ENSG00000123560	-0.0128746
ENSG00000254481	0.0128698
ENSG00000184208	0.012866
ENSG00000140285	-0.0128632
ENSG00000171659	0.0128622
ENSG00000183486	0.012859
ENSG00000124429	-0.0128575
ENSG00000267871	0.0128511
ENSG00000211898	-0.0128466
ENSG00000257303	0.0128453
ENSG00000055813	-0.0128447
ENSG00000153563	0.0128425
ENSG00000175857	0.0128373
ENSG00000160284	0.0128276
ENSG00000189320	0.0128174
ENSG00000164405	0.012816
ENSG00000179766	0.0128059
ENSG00000173535	-0.0127985
ENSG00000212443	0.0127979
ENSG00000205643	0.0127948
ENSG00000148824	0.01279
ENSG00000143847	0.0127833
ENSG00000174899	-0.0127806
ENSG00000176971	0.0127804
ENSG00000162148	0.0127764
ENSG00000145936	0.0127762
ENSG00000173295	0.012771
ENSG00000090447	0.0127702
ENSG00000264235	0.0127696
ENSG00000249679	0.0127689
ENSG00000076770	-0.0127595
ENSG00000165966	0.0127581
ENSG00000272156	0.0127533
ENSG00000115310	0.0127531
ENSG00000272654	0.0127438
ENSG00000224058	0.0127436
ENSG00000108924	0.0127393
ENSG00000169291	-0.0127335
ENSG00000184313	0.0127248
ENSG00000135749	0.0127242
ENSG00000142871	0.012724
ENSG00000272146	0.0127228
ENSG00000162881	0.0127224
ENSG00000173566	0.0127187
ENSG00000174348	0.0127141
ENSG00000184792	0.0127134
ENSG00000162994	0.01271
ENSG00000112695	0.0127079
ENSG00000131370	0.0126972
ENSG00000117632	0.0126962
ENSG00000249307	-0.012696
ENSG00000250497	-0.0126911
ENSG00000264469	-0.0126852
ENSG00000233527	0.0126831
ENSG00000081692	0.0126826
ENSG00000198825	0.0126773
ENSG00000079616	0.0126736
ENSG00000255153	0.0126708
ENSG00000159648	-0.0126703
ENSG00000272918	0.0126702
ENSG00000172345	0.0126682
ENSG00000196376	0.012655
ENSG00000121413	0.0126479
ENSG00000230530	0.0126469
ENSG00000127954	-0.0126414
ENSG00000095587	0.0126326
ENSG00000203727	0.0126252
ENSG00000125378	0.0126251
ENSG00000171471	0.0126184
ENSG00000140463	0.0126136
ENSG00000165410	0.0126085
ENSG00000100027	0.0126076
ENSG00000169249	0.0126042
ENSG00000251615	0.0125933
ENSG00000263272	0.0125879
ENSG00000267414	0.0125875
ENSG00000244041	0.0125737
ENSG00000145703	0.0125707
ENSG00000170262	-0.0125702
ENSG00000186326	-0.0125701
ENSG00000228889	0.0125699
ENSG00000064205	-0.0125645
ENSG00000187479	-0.0125637
ENSG00000167178	0.0125625
ENSG00000142675	0.012561
ENSG00000106125	0.0125589
ENSG00000261474	0.0125549
ENSG00000162849	-0.0125499
ENSG00000170271	0.0125471
ENSG00000187922	-0.0125434
ENSG00000120833	0.0125389
ENSG00000129749	-0.0125386
ENSG00000232070	0.0125376
ENSG00000144366	-0.012536
ENSG00000212670	0.0125289
ENSG00000164181	-0.0125276
ENSG00000258701	0.0125202
ENSG00000179388	0.012512
ENSG00000151773	0.0125085
ENSG00000164142	-0.0125037
ENSG00000117305	0.0125022
ENSG00000050426	0.0125006
ENSG00000198838	0.0125001
ENSG00000175701	0.0124952
ENSG00000247199	0.012491
ENSG00000138639	0.0124892
ENSG00000197134	0.012482
ENSG00000100351	0.0124752
ENSG00000159403	-0.0124736
ENSG00000082684	0.0124722
ENSG00000153956	0.0124707
ENSG00000182752	0.0124639
ENSG00000099338	0.0124634
ENSG00000107338	0.0124633
ENSG00000065989	-0.0124575
ENSG00000073282	0.0124564
ENSG00000253771	0.0124505
ENSG00000234072	0.0124491
ENSG00000184307	-0.0124485
ENSG00000188818	-0.0124468
ENSG00000245468	0.0124341
ENSG00000108771	0.0124252
ENSG00000168907	-0.0124227
ENSG00000175048	0.012422
ENSG00000075618	0.0124197
ENSG00000273373	0.0124149
ENSG00000197380	0.012409
ENSG00000182742	-0.012407
ENSG00000160345	0.0124058
ENSG00000255135	0.0124049
ENSG00000124216	0.0124041
ENSG00000196616	-0.0124017
ENSG00000180822	0.0123967
ENSG00000235587	-0.0123927
ENSG00000137038	0.0123879
ENSG00000135272	0.0123854
ENSG00000239776	0.0123836
ENSG00000187372	-0.0123828
ENSG00000204851	0.0123819
ENSG00000261490	0.012381
ENSG00000198873	-0.0123805
ENSG00000118689	0.0123719
ENSG00000083457	0.0123719
ENSG00000272960	0.0123694
ENSG00000106610	0.0123589
ENSG00000229019	0.0123584
ENSG00000107984	0.012358
ENSG00000168079	-0.0123575
ENSG00000183876	-0.0123521
ENSG00000170634	0.0123495
ENSG00000146063	0.0123478
ENSG00000112357	0.0123407
ENSG00000269696	0.0123333
ENSG00000224687	0.0123317
ENSG00000234444	0.012331
ENSG00000172296	-0.0123261
ENSG00000111331	0.0123213
ENSG00000161692	0.0123149
ENSG00000187134	-0.0123121
ENSG00000117122	0.0123086
ENSG00000164742	-0.0123055
ENSG00000113108	0.0123052
ENSG00000131188	0.0123048
ENSG00000228328	-0.0123046
ENSG00000257499	0.0123041
ENSG00000163814	-0.0122951
ENSG00000224616	0.0122939
ENSG00000121060	-0.0122848
ENSG00000181513	0.0122832
ENSG00000256995	-0.0122714
ENSG00000160349	0.0122584
ENSG00000137177	0.0122573
ENSG00000151640	0.0122571
ENSG00000180479	0.0122563
ENSG00000204850	0.0122508
ENSG00000181016	0.0122449
ENSG00000166206	-0.0122448
ENSG00000235437	0.0122407
ENSG00000145882	0.0122355
ENSG00000076555	-0.012235
ENSG00000128918	0.0122335
ENSG00000102886	0.0122301
ENSG00000269990	0.0122219
ENSG00000258738	0.0122201
ENSG00000203799	0.0122191
ENSG00000272512	0.0122169
ENSG00000164758	0.0122107
ENSG00000258498	-0.0122097
ENSG00000143387	0.012209
ENSG00000247809	0.0122065
ENSG00000141738	-0.0121957
ENSG00000259826	0.0121845
ENSG00000108272	0.0121844
ENSG00000177989	0.0121812
ENSG00000214425	-0.0121785
ENSG00000133134	0.0121781
ENSG00000230191	-0.0121775
ENSG00000273372	-0.0121775
ENSG00000271959	0.012176
ENSG00000204815	0.0121739
ENSG00000205791	0.0121679
ENSG00000177675	0.0121669
ENSG00000041515	0.0121592
ENSG00000137955	0.0121573
ENSG00000273237	-0.0121564
ENSG00000105784	-0.0121522
ENSG00000188859	-0.0121521
ENSG00000135905	0.0121423
ENSG00000172613	0.0121421
ENSG00000076706	0.0121379
ENSG00000175463	0.0121378
ENSG00000183549	-0.0121335
ENSG00000254017	0.0121276
ENSG00000253368	0.0121251
ENSG00000152642	-0.0121248
ENSG00000259802	0.0121242
ENSG00000006074	-0.0121218
ENSG00000139318	0.0121217
ENSG00000261088	0.0121211
ENSG00000176454	-0.01212
ENSG00000137563	-0.0121191
ENSG00000184682	-0.0121187
ENSG00000147697	0.012113
ENSG00000248866	0.0121126
ENSG00000183675	0.0121115
ENSG00000254837	0.0121109
ENSG00000272047	0.0121069
ENSG00000198003	0.0120987
ENSG00000123500	0.0120966
ENSG00000198918	0.0120934
ENSG00000177432	0.012088
ENSG00000111850	0.0120791
ENSG00000121797	-0.0120788
ENSG00000196963	0.0120674
ENSG00000267317	0.0120638
ENSG00000120254	0.0120601
ENSG00000162746	0.0120597
ENSG00000247595	0.0120593
ENSG00000120458	0.0120589
ENSG00000125319	-0.012058
ENSG00000174137	0.0120488
ENSG00000235641	0.012046
ENSG00000070404	0.0120405
ENSG00000109586	0.012038
ENSG00000250222	0.0120297
ENSG00000175315	-0.0120144
ENSG00000243680	0.0119981
ENSG00000070540	0.0119946
ENSG00000257038	0.0119908
ENSG00000214535	0.0119891
ENSG00000188916	0.0119853
ENSG00000173258	0.0119769
ENSG00000169583	-0.0119758
ENSG00000163873	-0.0119755
ENSG00000105926	-0.0119681
ENSG00000161800	-0.0119649
ENSG00000101132	0.0119611
ENSG00000171368	-0.0119516
ENSG00000165698	0.0119496
ENSG00000259030	0.0119479
ENSG00000168002	0.0119476
ENSG00000136944	0.0119423
ENSG00000172062	0.01194
ENSG00000175938	0.0119391
ENSG00000267064	-0.0119384
ENSG00000214456	-0.011937
ENSG00000148841	0.0119354
ENSG00000254002	-0.0119253
ENSG00000143603	0.0119243
ENSG00000204147	0.0119136
ENSG00000010310	0.0119125
ENSG00000003137	0.0118922
ENSG00000110848	0.0118897
ENSG00000176399	-0.0118888
ENSG00000173530	-0.0118879
ENSG00000261662	-0.0118836
ENSG00000170860	0.0118723
ENSG00000268713	0.0118693
ENSG00000171812	0.0118664
ENSG00000197405	0.0118655
ENSG00000101871	0.0118602
ENSG00000117174	0.0118595
ENSG00000186868	0.0118594
ENSG00000265148	0.0118524
ENSG00000129521	0.0118518
ENSG00000138685	0.0118486
ENSG00000147010	-0.0118461
ENSG00000154736	-0.0118444
ENSG00000156384	0.0118441
ENSG00000151327	0.0118416
ENSG00000111684	-0.0118401
ENSG00000265778	0.0118371
ENSG00000100379	0.0118342
ENSG00000157368	0.0118275
ENSG00000164104	0.0118267
ENSG00000119403	0.011826
ENSG00000267475	0.0118252
ENSG00000198039	0.0118224
ENSG00000250891	-0.0118192
ENSG00000173638	-0.0118186
ENSG00000250303	0.0118147
ENSG00000179772	0.0118142
ENSG00000033327	0.0118136
ENSG00000165275	0.0118121
ENSG00000171051	-0.011812
ENSG00000237977	0.0118071
ENSG00000253549	0.0118033
ENSG00000179168	-0.0118021
ENSG00000168386	0.0117982
ENSG00000271551	0.0117954
ENSG00000188404	0.0117895
ENSG00000152359	0.011789
ENSG00000127507	0.011785
ENSG00000188004	0.0117847
ENSG00000272645	0.0117712
ENSG00000135931	0.0117682
ENSG00000108309	0.011751
ENSG00000237172	0.0117492
ENSG00000165323	0.0117455
ENSG00000161265	0.0117445
ENSG00000166483	0.011736
ENSG00000112175	-0.0117272
ENSG00000111404	0.0117249
ENSG00000225731	0.0117139
ENSG00000163633	0.011713
ENSG00000213866	-0.0117122
ENSG00000256940	-0.0117099
ENSG00000260025	0.0117063
ENSG00000114841	0.0117049
ENSG00000180096	0.0117023
ENSG00000154589	0.0116991
ENSG00000150628	0.0116923
ENSG00000236609	0.0116883
ENSG00000242516	-0.0116877
ENSG00000172985	0.0116862
ENSG00000189316	0.0116832
ENSG00000204396	0.0116733
ENSG00000070778	0.0116617
ENSG00000117614	0.0116613
ENSG00000250957	0.0116547
ENSG00000180425	0.0116507
ENSG00000231419	0.0116505
ENSG00000142279	0.01165
ENSG00000237377	-0.0116458
ENSG00000224081	-0.011643
ENSG00000123243	0.0116418
ENSG00000213967	0.0116379
ENSG00000135842	0.0116373
ENSG00000261549	-0.0116142
ENSG00000147378	0.011612
ENSG00000228247	0.0116116
ENSG00000134297	0.0116097
ENSG00000141404	0.0115979
ENSG00000129214	0.0115974
ENSG00000166407	-0.0115903
ENSG00000198839	0.0115865
ENSG00000146540	0.0115846
ENSG00000134323	0.0115844
ENSG00000092929	0.0115843
ENSG00000133106	0.0115827
ENSG00000253842	0.0115823
ENSG00000251637	0.0115818
ENSG00000113068	0.0115744
ENSG00000272631	0.0115672
ENSG00000189337	0.0115616
ENSG00000215386	0.0115514
ENSG00000136003	0.0115492
ENSG00000146425	0.0115481
ENSG00000197321	0.0115452
ENSG00000183506	0.0115447
ENSG00000228594	0.0115436
ENSG00000179855	0.0115372
ENSG00000164440	0.0115265
ENSG00000151014	-0.0115263
ENSG00000168685	0.0115193
ENSG00000106686	0.0115105
ENSG00000197180	0.0115097
ENSG00000250786	0.0115062
ENSG00000273456	0.0115044
ENSG00000164403	0.0114981
ENSG00000224958	0.0114981
ENSG00000270504	0.0114878
ENSG00000253982	0.0114861
ENSG00000240344	0.0114764
ENSG00000178623	-0.0114732
ENSG00000169710	-0.0114731
ENSG00000088726	0.0114654
ENSG00000197956	0.0114642
ENSG00000211598	-0.0114578
ENSG00000183690	-0.0114566
ENSG00000267160	0.0114539
ENSG00000205544	0.0114467
ENSG00000048707	-0.0114325
ENSG00000230487	0.011428
ENSG00000056277	0.0114248
ENSG00000188157	0.0114245
ENSG00000176387	0.0114159
ENSG00000110811	0.0114149
ENSG00000157036	0.0114117
ENSG00000100003	-0.0114104
ENSG00000114790	0.0114102
ENSG00000137101	0.0114074
ENSG00000131591	0.0114073
ENSG00000058404	0.0114053
ENSG00000271721	0.0114002
ENSG00000231160	0.0113988
ENSG00000093072	0.0113944
ENSG00000140511	0.01139
ENSG00000020577	0.0113828
ENSG00000135333	0.011378
ENSG00000107130	0.0113768
ENSG00000184678	0.0113768
ENSG00000133661	0.0113762
ENSG00000125898	-0.0113716
ENSG00000159388	0.0113701
ENSG00000114853	0.0113699
ENSG00000175220	0.0113679
ENSG00000135097	0.0113674
ENSG00000175920	0.0113649
ENSG00000110090	-0.0113638
ENSG00000165084	0.0113632
ENSG00000171858	0.0113588
ENSG00000163545	0.0113551
ENSG00000147443	-0.0113535
ENSG00000171703	0.01135
ENSG00000182257	0.011342
ENSG00000164619	-0.0113416
ENSG00000113448	-0.0113342
ENSG00000179603	0.011334
ENSG00000100902	0.0113291
ENSG00000260793	0.0113259
ENSG00000232818	0.0113257
ENSG00000085563	-0.0113254
ENSG00000174403	0.0113235
ENSG00000234773	0.0113206
ENSG00000151632	-0.011312
ENSG00000075702	0.0113042
ENSG00000173598	-0.0113038
ENSG00000166780	0.0113016
ENSG00000100399	-0.0113015
ENSG00000186615	0.0112989
ENSG00000164038	0.0112989
ENSG00000165071	0.0112988
ENSG00000224152	0.0112966
ENSG00000176659	-0.0112958
ENSG00000090565	0.0112947
ENSG00000196172	0.0112916
ENSG00000023445	-0.0112913
ENSG00000236914	0.0112912
ENSG00000185950	0.011289
ENSG00000124731	-0.0112853
ENSG00000129009	0.0112843
ENSG00000070371	0.0112835
ENSG00000154767	0.0112825
ENSG00000100105	0.0112789
ENSG00000255366	0.0112783
ENSG00000180921	0.0112766
ENSG00000102081	0.0112765
ENSG00000254510	-0.0112735
ENSG00000272523	0.0112697
ENSG00000197119	0.0112671
ENSG00000231889	0.0112647
ENSG00000111678	0.011262
ENSG00000254473	0.0112572
ENSG00000112293	0.0112568
ENSG00000271643	0.0112542
ENSG00000248508	0.0112513
ENSG00000149089	0.0112492
ENSG00000262877	0.011242
ENSG00000184384	0.0112416
ENSG00000241014	-0.0112331
ENSG00000111196	0.0112327
ENSG00000099326	0.0112324
ENSG00000139974	0.0112301
ENSG00000166532	0.0112274
ENSG00000160299	-0.0112259
ENSG00000185909	0.0112259
ENSG00000158457	0.0112252
ENSG00000120669	0.0112212
ENSG00000169020	0.0112179
ENSG00000257337	0.0112133
ENSG00000179085	0.0112123
ENSG00000176204	-0.0112098
ENSG00000249042	0.0112062
ENSG00000137970	0.0112048
ENSG00000183891	0.0112048
ENSG00000203747	-0.0112044
ENSG00000159216	0.0112012
ENSG00000268032	-0.011199
ENSG00000176209	0.0111981
ENSG00000117245	0.0111975
ENSG00000091986	0.0111896
ENSG00000196159	0.0111883
ENSG00000154620	0.0111871
ENSG00000127252	0.0111835
ENSG00000247400	0.011182
ENSG00000261616	-0.0111801
ENSG00000227540	0.0111799
ENSG00000247416	0.0111797
ENSG00000105204	0.0111761
ENSG00000219928	0.0111749
ENSG00000153291	0.0111731
ENSG00000181873	0.0111722
ENSG00000112290	-0.0111719
ENSG00000100625	0.0111702
ENSG00000236017	-0.0111631
ENSG00000173163	0.0111593
ENSG00000124780	0.0111528
ENSG00000137764	0.0111469
ENSG00000184110	0.0111413
ENSG00000198886	0.0111409
ENSG00000077522	0.0111391
ENSG00000269996	0.0111319
ENSG00000141456	0.0111292
ENSG00000100450	0.0111291
ENSG00000175591	-0.011123
ENSG00000143198	0.0111229
ENSG00000272288	0.0111206
ENSG00000137269	0.0111194
ENSG00000244701	-0.0111123
ENSG00000248187	-0.0111067
ENSG00000144810	0.0111042
ENSG00000180354	0.0111033
ENSG00000215595	-0.011098
ENSG00000141837	0.0110967
ENSG00000123119	0.011085
ENSG00000148834	0.0110767
ENSG00000108947	0.0110747
ENSG00000129474	0.0110741
ENSG00000060656	-0.0110731
ENSG00000138646	0.0110706
ENSG00000268006	0.0110702
ENSG00000159917	0.0110675
ENSG00000177752	0.0110656
ENSG00000164008	0.0110579
ENSG00000112667	0.0110574
ENSG00000260432	-0.0110539
ENSG00000214293	0.011052
ENSG00000251459	0.011048
ENSG00000253426	0.011045
ENSG00000146215	0.011043
ENSG00000162576	0.0110385
ENSG00000158813	-0.0110333
ENSG00000182013	0.0110324
ENSG00000214548	0.0110304
ENSG00000197062	0.0110288
ENSG00000247092	0.0110285
ENSG00000196312	-0.0110258
ENSG00000143195	0.0110251
ENSG00000068885	0.0110235
ENSG00000244627	0.0110222
ENSG00000273033	0.0110141
ENSG00000254453	0.0110124
ENSG00000245025	0.0110082
ENSG00000121361	-0.0110049
ENSG00000134853	-0.0109986
ENSG00000005022	0.0109959
ENSG00000146094	-0.0109917
ENSG00000110328	0.0109912
ENSG00000203650	0.0109877
ENSG00000196436	-0.0109852
ENSG00000163521	0.0109835
ENSG00000243199	0.0109832
ENSG00000130294	0.0109821
ENSG00000170085	0.0109795
ENSG00000126458	0.0109791
ENSG00000267470	0.0109731
ENSG00000162496	0.0109702
ENSG00000173209	0.0109684
ENSG00000140009	0.010967
ENSG00000137218	0.0109666
ENSG00000177640	0.0109664
ENSG00000171241	0.0109655
ENSG00000170624	-0.0109643
ENSG00000069702	-0.0109622
ENSG00000243716	0.0109596
ENSG00000165443	0.0109588
ENSG00000120162	-0.0109573
ENSG00000225791	0.0109544
ENSG00000180953	0.0109541
ENSG00000167074	0.0109532
ENSG00000107719	0.0109506
ENSG00000266964	0.0109496
ENSG00000129204	0.0109496
ENSG00000170315	0.0109446
ENSG00000084693	0.010943
ENSG00000239828	0.01094
ENSG00000182667	0.0109399
ENSG00000140993	0.0109397
ENSG00000111341	0.0109377
ENSG00000236844	0.0109352
ENSG00000110723	-0.0109345
ENSG00000129282	0.0109276
ENSG00000255200	-0.0109235
[truncated: 13,883 more rows]
