# Supplementary material for: Multi-omics integration identifies key upstream regulators of pathomechanisms in hypertrophic cardiomyopathy due to truncating MYBPC3 mutations
Source: Clin Epigenetics. 2021 Mar 23;13:61. doi: 10.1186/s13148-021-01043-3 (PMC7989210; doi:10.1186/s13148-021-01043-3)
Supplement: Supplementary file 14 — Additional file 14: Table S6 (A) The overlapping genes between differentially expressed genes using DESeq2 and the top 2,000 genes that discriminate HCM from control hearts using O2PLS. (B) Enriched GO terms and pathways by the overlapping genes. (C) Enriched GO terms and pathways by a subset of the overlapping genes, which showed the same changing direction at their protein levels in HCM hearts when compared with controls [file 13148_2021_1043_MOESM14_ESM.xlsx]

## Sheet: Supplementary Table 6A
Overlapping genes between DESeq2 and O2PLS analysis	Changing direction in HCM versus controls
SLITRK4	+
C14orf132	+
DELE1	+
CRYM	+
SEZ6L	+
ADAMTSL5	+
HSPA2	+
CENPA	+
FARP1	+
UCHL1	+
THY1	+
SOCS2-AS1	+
CTF1	+
PIK3IP1	+
SFRP4	+
TSPAN32	+
PRR16	+
B4GALNT1	+
DMC1	+
WDR66	+
P2RX6	+
LOC105378663	+
CUX2	+
LEF1	+
TANGO2	+
HSD17B14	+
BRINP1	+
ST8SIA2	+
MAFK	+
MYL7	+
ISCU	+
SDSL	+
DLK2	+
BRSK1	+
DUSP26	+
SYTL5	+
TTC9	+
SMOC2	+
TNNT1	+
DIO2	+
LOC107985194	+
FRZB	+
ASB18	+
COPZ2	+
RHOBTB1	+
KCNC4	+
HTRA1	+
HBB	+
PKIG	+
LAMA5-AS1	+
TGFB2-AS1	+
ACE2	+
NXPH4	+
MYOZ3	+
METTL21EP	+
TMEM140	+
LINC01278	+
GATM	+
PENK	+
SYNPO2L	+
LOC101929705	+
IRX6	+
CCND1	+
CA3	+
PLEKHB1	+
HMGCL	+
ALDH3B1	+
CCDC113	+
ORMDL3	+
TRNP1	+
TNFRSF4	+
PACS1	+
MLLT11	+
WIPF3	+
OXCT2P1	+
DNTTIP1	+
POLR1E	+
PHLDA1	+
SRRM4	+
PPDPF	+
MYL2	+
TNNI3	+
MIR4435-2HG	+
ARRDC3	+
ZBTB47	+
F2R	+
SIGLEC17P	+
COL16A1	+
CST2	+
THBS4	+
HIST1H2AC	+
SNCA	+
DOK7	+
PLCE1	+
RGS11	+
GNB3	+
TM7SF2	+
TPD52L1	+
MAP2	+
WIPI1	+
LOC100506688	+
JMJD4	+
MORN4	+
SLC16A9	+
HMGN2	+
CYTOR	+
NPR3	+
ATP1A4	+
F2RL2	+
IL17D	+
TXNL4B	+
P3H2	+
OGDHL	+
LOC100505774	+
LOC100129129	+
EXT1	+
LINC01588	+
SBDSP1	+
ABHD11	+
DDAH2	+
AFMID	+
C16orf45	+
HBA1	+
DWORF	+
C4orf36	+
EIF2AK3-DT	+
CYP2T1P	+
FMOD	+
LOC101927752	+
MAP2K5	+
LMOD2	+
ENPP2	+
MCAM	+
KANSL1-AS1	+
LOC101927417	+
ARHGAP1	+
ESM1	+
ATAT1	+
IER5	+
PPP2R2B	+
SULT1A1	+
HIST2H2BE	+
SGCG	+
KIAA1755	+
GRID1	+
C5orf56	+
CAPN3	+
C9orf24	+
CIART	+
CYP2J2	+
DDR1	+
AEBP1	+
LEFTY2	+
RPS10	+
CTGF	+
MASP1	+
DOK5	+
LINC00484	+
SMIM30	+
TRIM41	+
CLIP3	+
IDI2-AS1	+
CYP11A1	+
CLBA1	+
ODC1	+
HBA2	+
C10orf71	+
MAP3K7CL	+
RAB11FIP3	+
SLC26A4	+
LINC00888	+
LINC00672	+
C1orf198	+
LOC101928731	+
LOC643072	+
SFTA1P	+
MTURN	+
SEMA3B-AS1	+
LINC01460	+
LINC00702	+
RND3	+
RASL11B	+
ABCC8	+
DCLK2	+
SYF2	+
PTPRR	+
IL31RA	+
LPP-AS2	+
SLC30A2	+
NUP188	+
GRIA3	+
RAB26	+
UNC5B-AS1	+
HSPB6	+
TMEM30B	+
QPCT	+
LOC100506725	+
ATP5IF1	+
ST6GALNAC4	+
ZDHHC14	+
ZNF853	+
GDF15	+
ASIP	+
ADAP1	+
SNAPIN	+
DACT3	+
DEPP1	+
MYOZ1	+
LINC02502	+
C6orf48	+
LYPLAL1	+
LRRC8C-DT	+
CLU	+
ADAM18	+
XG	+
GADD45A	+
MYBL1	+
DHRS3	+
INPP5F	+
VGLL2	+
DUSP15	+
LYPD1	+
HAAO	+
ZNF436-AS1	+
MAP4	+
LCN12	+
GADD45G	+
P3H3	+
CCDC197	+
C16orf89	+
PHF19	+
AP3M2	+
ZSCAN18	+
AK5	+
LRRC49	+
MGST3	+
TMEM147-AS1	+
EIF3J-DT	+
HSD17B8	+
MYL5	+
KCNJ4	+
NT5C2	+
EFHD1	+
YPEL1	+
FCER1A	+
NDP	+
FBXL12	+
TTC39A	+
IFT43	+
ARID5A	+
LINC02028	+
COA5	+
DNPH1	+
BCAS4	+
SKA2	+
UBB	+
SPATA4	+
AGBL5	+
KLHDC8B	+
DDT	+
PELP1	+
CYS1	+
KCNMB4	+
PEX11G	+
RIPOR2	+
IDI2	+
PCBD1	+
ARMS2	+
DBP	+
UQCRQ	+
DYRK4	+
CAMK2B	+
TMCO3	+
JAK2	+
MEAF6	+
GAS6-DT	+
TMEM231	+
LTBP2	+
BBS4	+
C5orf38	+
CCDC28A	+
SLC38A3	+
TNRC6C-AS1	+
PLEKHA4	+
CASP17P	+
VLDLR-AS1	+
HIST3H2A	+
B3GNT9	+
ACTA1	+
MDK	+
PEX7	+
GPR27	+
TRAM2-AS1	+
PFDN1	+
KCNMB1	+
C1orf54	+
TMEM74	+
MPC1	+
TPM3	+
LOC101929759	+
SORBS2	+
TSC22D3	+
MFAP4	+
FRMD3	+
ADGRL3	+
SEL1L2	+
UBBP4	+
LOC112268098	+
NPIPB2	+
SCUBE2	+
LOC100288846	+
UCMA	+
VXN	+
FADS2	+
ACYP2	+
LETMD1	+
SLC25A45	+
GPR173	+
TCEA2	+
NAV2-AS2	+
GLRX	+
RERGL	+
NKG7	+
CATSPER2P1	+
ATP1B4	+
SOCS2	+
AZIN1	+
MED12L	+
AQP10	+
RAB24	+
RPLP0P2	+
RABGGTB	+
PCNX4	+
MIR100HG	+
SMARCD3	+
SH3D19	+
ITPRIP	+
ASPN	+
MRPL46	+
STARD13-AS	+
ETV4	+
C7orf50	+
IGSF1	+
NPPA	+
SAMD12	+
SMIM19	+
SNAPC5	+
MDFIC	+
GRM1	+
ZRSR2	+
FOXS1	+
ZNF541	+
B9D1	+
MTCL1	+
GPNMB	+
ARHGAP24	+
MTLN	+
NES	+
KIAA1211	+
LSP1	+
GABRE	+
KIF22	+
DIPK1C	+
TGFB2	+
TMEM42	+
GALNT18	+
SHB	+
LOC283335	+
KCNJ2-AS1	+
ADHFE1	+
BGN	+
GADD45B	+
ZNF277	+
COMMD6	+
CATIP-AS1	+
LSM3	+
LOC100291105	+
PER3	+
SMIM4	+
LOC101927974	+
CHCHD6	+
LOC100507437	+
MKRN2OS	+
PFDN4	+
PER2	+
PI16	+
RAD9A	+
ATP6V1G2	+
FSCN1	+
HJV	+
R3HDM2	+
TMEM44-AS1	+
PPP1R15A	+
LAYN	+
SEMA5B	+
MIR1-1HG-AS1	+
CTHRC1	+
RRAS	+
CYSRT1	+
TYRP1	+
LINP1	+
LOC400499	+
HRASLS	+
U2AF1L4	+
LOC101927702	+
ATP5ME	+
COX7A2L	+
LOC101928847	+
MIR99AHG	+
BCL2	+
TDRKH-AS1	+
AMPH	+
APIP	+
CCDC168	+
TSTD3	+
PLD4	+
DMAC1	+
SPATA20	+
SHISA2	+
PHLDB3	+
APOE	+
CD27-AS1	+
KIF1A	+
TBCA	+
PYROXD2	+
P2RX1	+
COL9A1	+
PSMG4	+
CHCHD5	+
C11orf71	+
CDPF1	+
SNHG18	+
ARL16	+
SCN2B	+
MAEL	+
URB1	+
SPACA9	+
CREG2	+
FAM177A1	+
LRRC1	+
CLIC6	+
NACA	+
LINC01619	+
WTIP	+
MRPL40	+
LOC100270804	+
RLN2	+
GDF6	+
MYL12A	+
DYRK1B	+
KLHDC9	+
SETD9	+
TSPAN9	+
SMIM8	+
EXTL1	+
HMGB2	+
RGS6	+
LOC102724889	+
DNAAF3	+
GTF2H5	+
SERPINE2	+
TTLL7	+
TBC1D7	+
PROM1	+
MNS1	+
LINC01220	+
P2RY13	+
C12orf45	+
PPFIA4	+
IFI6	+
RHNO1	+
LINC01405	+
ARRDC2	+
TRAPPC6A	+
AZIN1-AS1	+
FIBIN	+
SLC25A21-AS1	+
XPA	+
MBP	+
SLC1A7	+
VAT1L	+
FRS3	+
BMP8A	+
COX7A2	+
S100A13	+
MRPL57	+
KIAA0556	+
RHCG	+
FOXN3-AS1	+
SOX15	+
TMEM163	+
CYTL1	+
LINC00900	+
C12orf57	+
NRIP3	+
TMEM143	+
ZNF610	+
LINC01270	+
ACTN2	+
LUM	+
LOC101929704	+
C1QTNF1-AS1	+
LOC101927418	+
PPIL3	+
FLJ42969	+
BOLA3	+
S100A6	+
SHLD1	+
MFAP2	+
DERL3	+
ITGBL1	+
IRX1	+
CARNS1	+
CPLX1	+
PTRHD1	+
ISG15	+
MICA	+
LAMTOR5-AS1	+
LOC105371115	+
CXCL9	+
PCOLCE-AS1	+
LINC-PINT	+
SCG5	+
COL22A1	+
BORCS8	+
DDAH1	+
ZNF57	+
ALKAL2	+
TIGD1	+
FAM133A	+
ITGA10	+
NDUFA11	+
KTN1-AS1	+
MSTN	+
NUDT14	+
SLC27A6	+
RENBP	+
PTPN21	+
STAG3L4	+
ERICH2	+
GPA33	+
TGFB3	+
COX14	+
KIF13A	+
LCA5L	+
RUNX2	+
C19orf48	+
C1QTNF3	+
LOC100506302	+
TMBIM4	+
STMN1	+
MED30	+
B3GNT5	+
MIR181A2HG	+
TMEM126B	+
C5orf46	+
LINC02482	+
SAMD4A	+
LINC02268	+
RAB20	+
OMD	+
SMIM29	+
SDHAF4	+
CHD5	+
SLC25A5	+
CRISPLD1	+
ADAM19	+
PRRT3	+
ITGAE	+
CNKSR1	+
CSPG5	+
NAP1L3	+
SNHG20	+
LINC01186	+
PLXDC1	+
CCDC74A	+
COX7B	+
ADA2	+
ZFAS1	+
LYRM9	+
PRR34	+
CERS4	+
UQCC2	+
UNC80	+
CDC26	+
ZNF844	+
GAB2	+
PLS3-AS1	+
GTF2IRD2	+
ARHGAP33	+
ORC5	+
CLEC2B	+
FAM228B	+
SLC44A5	+
LOC101929243	+
PCDH15	+
RAB33A	+
ZNF365	+
LOH12CR2	+
TSPOAP1-AS1	+
EDA2R	+
LRRC52-AS1	+
ACOT4	+
EXOG	+
CBLN1	+
LOC107105282	+
TRAPPC2L	+
MAB21L1	+
SH3RF3	+
UNC13D	+
RIN3	+
ARMC4	+
LTBP1	+
SRP14-AS1	+
FLJ45513	+
TMC6	+
IRX2	+
CLEC1A	+
NSG1	-
CCDC134	-
NALCN	-
PCDHGA6	-
LOC100507156	-
SH2D2A	-
RGS9BP	-
NOCT	-
WWC1	-
ELANE	-
SLC19A3	-
F5	-
SLCO2A1	-
AQP9	-
SSTR5	-
CNTNAP3	-
SENCR	-
CDHR1	-
CDCP1	-
PDK4	-
FAIM2	-
TCF24	-
LRRTM4	-
TGFA	-
TOGARAM2	-
SMIM25	-
LRP2BP	-
PLA1A	-
IL6	-
SDK1	-
TRIP13	-
SAA1	-
HMGCS2	-
EXPH5	-
GRB7	-
LINC01550	-
C1R	-
MCTP2	-
AKR1C1	-
FAAH	-
FXYD3	-
CTSG	-
DIO3OS	-
MBNL3	-
LRRC7	-
SLC24A4	-
FASN	-
SCN1A	-
FKBP11	-
VEGFD	-
PRLR	-
CASTOR3	-
LRRC8E	-
ARSI	-
ITGB8	-
SLC16A10	-
IFNLR1	-
LOC100287036	-
PQLC2L	-
STK26	-
IL17RB	-
GRIN2A	-
IL1RN	-
CHRDL2	-
ADH1B	-
RNASE2	-
CHST7	-
HEPACAM	-
EFHC2	-
FGF10	-
PTGS1	-
HK3	-
LILRA6	-
RALYL	-
ADCYAP1R1	-
ITPKA	-
MYZAP	-
SPTLC3	-
TDRD9	-
EREG	-
SLC15A2	-
PTGS2	-
BLOC1S1-RDH5	-
ABCB1	-
PLP1	-
GABRB3	-
TUBA3E	-
RAP1GAP	-
FGFR4	-
LONRF3	-
ZNF852	-
NGFR	-
FCGR3A	-
REPS2	-
DISP1	-
TPPP	-
ZDHHC23	-
MIR663AHG	-
PRIMA1	-
GTF2H2	-
CPNE5	-
GCHFR	-
TMEM63C	-
HAVCR2	-
RACGAP1	-
LINC00881	-
PDE11A	-
DLK1	-
PKHD1L1	-
CHADL	-
CDS1	-
GABBR2	-
VSTM2L	-
CXCL1	-
SLC46A1	-
ADAMTS7	-
ELF3	-
CCL2	-
LCN6	-
RELN	-
PHACTR3	-
CCDC85A	-
RTN4RL1	-
FGF7	-
KCNN2	-
DMRTA1	-
CADM3	-
GRIK3	-
IL1RL1	-
AQP4	-
KRT19	-
PCDH20	-
RETSAT	-
CNTN3	-
SERTM1	-
MPP6	-
PRR26	-
VGLL3	-
ERBB3	-
SLC9A7	-
CFD	-
BMP7	-
ADCY1	-
HMOX1	-
GPD1	-
IL10RA	-
VSIG4	-
EDA	-
TUBA3D	-
ADAMTS5	-
RHAG	-
FAM160A1	-
TNFRSF10D	-
BIRC3	-
LYVE1	-
CAMSAP3	-
KCNK3	-
TSPEAR	-
C2CD4C	-
TRIM25	-
HMOX2	-
AOX1	-
ANGPTL4	-
DNAH3	-
BMP5	-
OSBPL3	-
VIT	-
C11orf96	-
ISPD	-
MYLK3	-
AZGP1	-
TFRC	-
ADAMTS4	-
PTPRU	-
LPCAT4	-
RORB	-
SERPINA5	-
MARVELD2	-
C4orf54	-
SGCD	-
GPR180	-
SIGLEC9	-
GPRC5A	-
C1orf105	-
P2RY2	-
PLA2G2A	-
CCL11	-
NUDT4B	-
PCNT	-
F13A1	-
FRK	-
LSAMP	-
SORCS1	-
KCNJ8	-
VPS13D	-
SYNE3	-
GATA5	-
IL6R	-
ADAMTS15	-
SH3KBP1	-
TMX4	-
LRRN3	-
HEY2	-
FOSB	-
GPSM2	-
PDGFRA	-
DPY19L2P2	-
SLC25A34	-
C7	-
IL20RA	-
PLIN5	-
SNAI3	-
LBH	-
PDE4A	-
TRPC4	-
SNX22	-
CPNE4	-
DHRS7C	-
SPOCK1	-
C6	-
LOC403323	-
TMEM132B	-
TC2N	-
HCN4	-
HOOK1	-
GRK5	-
LINC01844	-
TNFAIP8	-
GFPT2	-
FAM167B	-
AIF1L	-
TGFBR3	-
SERINC5	-
AMD1	-
PDE4B	-
GALNT15	-
SLC5A1	-
STEAP2	-
TMEM178B	-
RALGPS2	-
GRIN3A	-
FHL2	-
SHE	-
ACACB	-
LDHA	-
CD109	-
APOB	-
FAM124A	-
RARRES1	-
MARCO	-
NCEH1	-
KLHL32	-
MGST1	-
GNMT	-
CLGN	-
SMTNL2	-
CPT1A	-
OPN3	-
STEAP3	-
C3	-
GRIK2	-
FAM222A	-
AASS	-
BLM	-
SYT13	-
PLEKHH1	-
SLCO4A1	-
PHACTR1	-
G0S2	-
STEAP4	-
STXBP6	-
GPD1L	-
GCOM1	-
NECTIN1	-
CHL1	-
RNF122	-
NR4A3	-
GRB14	-
SGPP2	-
TBX20	-
NUDT4	-
LPCAT3	-
ETNPPL	-
CORIN	-
LINC01880	-
CHGB	-
PDE4D	-
CDCA2	-
NPTX2	-
ZNF252P	-
MAP3K8	-
B3GALT2	-
CA14	-
FCN3	-
SOCS3	-
SELE	-
ATP2A2	-
ADAM11	-
CHDH	-
CADPS2	-
PTDSS1	-
METTL7B	-
ADGRD1	-
FGF12	-
ARNTL	-
S1PR3	-
MYH6	-
KCNIP2	-

## Sheet: Supplementary Table 6B
Category	ID	Name	Source	p-value	q-value Bonferroni	q-value FDR B&H	q-value FDR B&Y	Hit Count in Query List	Hit Count in Genome	Hit in Query List
GO: Molecular Function	GO:0008201	heparin binding		1.782e-08	2.599e-05	2.599e-05	0.0002043	26	180	MDK,SAA1,CCL2,FGF7,FGF10,FGF12,FGFR4,GPNMB,APOB,APOE,SMOC2,MSTN,ADA2,BMP7,ADAMTS15,ADAMTS5,TGFBR3,THBS4,SERPINA5,SERPINE2,RTN4RL1,ADAMTSL5,CCN2,CTSG,ELANE,LTBP2
GO: Molecular Function	GO:0005539	glycosaminoglycan binding		7.561e-08	0.0001102	5.512e-05	0.0004334	30	246	MDK,SAA1,CCL2,FGF7,FGF10,FGF12,FGFR4,GPNMB,APOB,APOE,LAYN,SMOC2,MSTN,ADA2,BGN,LYVE1,BMP7,ADAMTS15,ADAMTS5,TGFBR3,THBS4,SERPINA5,VIT,SERPINE2,RTN4RL1,ADAMTSL5,CCN2,CTSG,ELANE,LTBP2
GO: Molecular Function	GO:1901681	sulfur compound binding		1.186e-07	0.0001729	5.765e-05	0.0004533	32	279	ACACB,MDK,SAA1,MGST1,LRRTM4,CCL2,FGF7,FGF10,FGF12,FGFR4,GPNMB,APOB,APOE,OGDHL,SMOC2,GNMT,MSTN,ADA2,BMP7,ADAMTS15,ADAMTS5,TGFBR3,THBS4,SERPINA5,HMGCL,SERPINE2,RTN4RL1,ADAMTSL5,CCN2,CTSG,ELANE,LTBP2
GO: Molecular Function	GO:0008083	growth factor activity		2.84e-07	0.0004141	0.0001035	0.000814	23	167	EREG,MDK,FGF7,FGF10,FGF12,VEGFD,CSPG5,MSTN,ADA2,BMP5,BMP7,CXCL1,TGFA,TGFB2,TGFB3,LEFTY2,THBS4,GDF6,BMP8A,GDF15,CCN2,IL6,IL6R
GO: Molecular Function	GO:0005160	transforming growth factor beta receptor binding		8.684e-06	0.01266	0.00241	0.01895	11	54	RASL11B,MSTN,BMP5,BMP7,TGFB2,TGFB3,LEFTY2,TGFBR3,GDF6,BMP8A,GDF15
GO: Molecular Function	GO:0042803	protein homodimerization activity		9.917e-06	0.01446	0.00241	0.01895	70	1018	ERBB3,EXT1,ACTN2,IL17D,FAAH,S100A6,S100A13,FASN,MGST1,VEGFD,AOX1,INPP5F,APOE,DNPH1,ZNF365,DLK2,DMRTA1,CADM3,MYH6,KIF1A,STK26,BCL2,NDP,MSTN,ADA2,BLM,GPD1L,FIBIN,NGFR,SLC9A7,MTCL1,GPD1,NPR3,CAMK2B,GRB14,CRPPA,GRIK2,CLIC6,ODC1,CBLN1,TFRC,TGFB2,HEY2,PCBD1,TPD52L1,PDGFRA,GDF6,PEX7,HMGCL,HMOX1,PLEKHB1,C16orf89,TYRP1,GDF15,XPA,DNTTIP1,CRYM,HSPB6,PRLR,IL6R,RAB11FIP3,MASP1,PTGS2,GADD45A,NECTIN1,KCNN2,RAP1…
GO: Molecular Function	GO:0043177	organic acid binding		2.583e-05	0.03766	0.005329	0.0419	31	342	ACACB,ACTN2,CCL2,LRRC7,SELE,P3H3,SNCA,LAYN,SLC46A1,GCHFR,GNMT,LYVE1,GRIA3,GRID1,GRIK2,GRIK3,GRIN2A,GRM1,HBA1,HBA2,HBB,SERPINA5,DDAH2,DDAH1,HMGCL,RELN,LCN12,AKR1C1,GRIN3A,P3H2,ST8SIA2
GO: Molecular Function	GO:0015075	ion transmembrane transporter activity		2.924e-05	0.04263	0.005329	0.0419	75	1150	ACTN2,KCNIP2,S100A6,SLC24A4,SCN1A,SCN2B,CCL2,FGF12,LRRC7,LRRC8E,RHCG,SLC25A5,AQP9,SLC1A7,SLC5A1,SLC15A2,SLCO2A1,MPC1,ATP1A4,ATP2A2,UNC80,SLC16A10,SLC25A45,GABRB3,GABRE,ATP5ME,ATP6V1G2,SLC46A1,STRIT1,GPD1L,ABCC8,GLRX,SLC9A7,KCNMB4,SLC38A3,NPPA,SLC19A3,GRIA3,GRID1,GRIK2,GRIK3,CLIC6,GRIN2A,TFRC,ATP1B4,P2RX1,P2RX6,COX7A2L,TNNI3,PDE4B,PDE4D,SLC26A4,TRPC4,TMC6,ABCB1,NALCN,FXYD3,HSPA2,COX7A2,COX7B,RELN,…
GO: Molecular Function	GO:0015318	inorganic molecular entity transmembrane transporter activity		4.859e-05	0.07084	0.007871	0.06189	71	1089	ACTN2,KCNIP2,SLC24A4,SCN1A,SCN2B,CCL2,FGF12,LRRC7,LRRC8E,AQP4,AQP9,SLC1A7,SLC5A1,SLC15A2,SLCO2A1,MPC1,ATP1A4,ATP2A2,UNC80,SLC16A10,GABRB3,GABRE,ATP5ME,ATP6V1G2,SLC46A1,STRIT1,GPD1L,ABCC8,GLRX,SLC9A7,KCNMB4,SLC38A3,NPPA,SLC19A3,GRIA3,GRID1,GRIK2,GRIK3,CLIC6,GRIN2A,TFRC,ATP1B4,P2RX1,P2RX6,COX7A2L,TNNI3,PDE4B,PDE4D,SLC26A4,TRPC4,TMC6,ABCB1,NALCN,FXYD3,HSPA2,COX7A2,COX7B,RELN,SLC30A2,KCNC4,KCNJ4,KCNJ…
GO: Molecular Function	GO:0022857	transmembrane transporter activity		0.0001112	0.1621	0.01391	0.1094	82	1340	ACTN2,KCNIP2,S100A6,SLC24A4,SCN1A,SCN2B,CCL2,FGF12,LRRC7,LRRC8E,RHCG,SLC25A5,AQP4,AQP9,SLC1A7,SLC5A1,SLC15A2,SLCO2A1,MPC1,SNCA,ATP1A4,ATP2A2,UNC80,SLC16A10,SLC25A45,GABRB3,GABRE,ATP5ME,ATP6V1G2,AZGP1,CPLX1,SLC46A1,BCL2,STRIT1,GPD1L,ABCC8,GLRX,SLC9A7,KCNMB4,SLC38A3,NPPA,SLC19A3,GRIA3,GRID1,GRIK2,GRIK3,CLIC6,GRIN2A,TFRC,ATP1B4,P2RX1,P2RX6,COX7A2L,TNNI3,DISP1,PDE4B,PDE4D,SLC26A4,TRPC4,TMC6,ABCB1,NAL…
GO: Molecular Function	GO:0005102	signaling receptor binding		0.0001138	0.1659	0.01391	0.1094	105	1817	EREG,ACTN2,ADAM11,IL17D,MDK,F2R,S100A13,SAA1,CXCL9,CCL2,FGF7,FGF10,FGF12,LRRC7,CCL11,ARRDC3,GPNMB,FHL2,VEGFD,MED30,APOB,APOE,ALKAL2,FRK,ARNTL,ASIP,CSPG5,NSG1,DLK2,RASL11B,SMARCD3,SNCA,ATP2A2,MARCO,NES,ADAM18,FRS3,NDP,MSTN,ADA2,ARID5A,SOCS2,BMP5,BMP7,PER2,NGFR,C3,MICA,NPPA,CAPN3,GRB14,ESM1,CLIC6,GRIN2A,ADAMTS5,GRM1,CXCL1,TGFA,TGFB2,TGFB3,LEFTY2,TGFBR3,THBS4,THY1,P2RY2,NXPH4,PDE4D,PDGFRA,GDF6,PENK,…
GO: Molecular Function	GO:0005215	transporter activity		0.0001145	0.167	0.01391	0.1094	90	1505	ACTN2,KCNIP2,S100A6,SLC24A4,SCN1A,SCN2B,CCL2,FGF12,LRRC7,LRRC8E,RHCG,SLC25A5,SLC27A6,APOB,APOE,AQP4,AQP9,SLC1A7,SLC5A1,SLC15A2,SLCO2A1,MPC1,SNCA,ATP1A4,ATP2A2,UNC80,SLC16A10,SLC25A45,GABRB3,GABRE,ATP5ME,ATP6V1G2,AZGP1,CPLX1,SLC46A1,BCL2,STRIT1,GPD1L,ABCC8,GLRX,SLC9A7,KCNMB4,SLC38A3,NPPA,SLC19A3,GRIA3,GRID1,GRIK2,GRIK3,CLIC6,GRIN2A,TFRC,ATP1B4,P2RX1,P2RX6,COX7A2L,HBA1,HBA2,TNNI3,HBB,DISP1,PDE4B,PD…
GO: Molecular Function	GO:0042802	identical protein binding		0.0001364	0.1989	0.01451	0.1141	113	1995	ERBB3,ACACB,MNS1,IER5,EXT1,ACTN2,IL17D,ACYP2,KCNIP2,FAAH,S100A6,S100A13,FASN,HOOK1,MGST1,PLIN5,C1QTNF3,FHL2,VEGFD,RHCG,NUDT14,AOX1,INPP5F,APOE,DNPH1,AQP4,ZNF365,SCUBE2,DACT3,DLK2,DMRTA1,SNCA,GABRB3,CADM3,MYH6,KIF1A,STK26,FRS3,BCL2,NDP,GNMT,MSTN,ADA2,BLM,GPD1L,GADD45G,PER2,FIBIN,NGFR,SLC9A7,MTCL1,SDK1,GPD1,NPR3,CAMK2B,TRIM41,RALYL,GRB7,GRB14,CRPPA,GRIK2,CLIC6,ODC1,GRM1,CBLN1,TFRC,TGFB2,TGFB3,P2RX6…
GO: Molecular Function	GO:0048018	receptor ligand activity		0.0001394	0.2032	0.01451	0.1141	38	497	EREG,IL17D,MDK,SAA1,CXCL9,CCL2,FGF7,FGF10,FGF12,CCL11,GPNMB,VEGFD,CSPG5,NDP,MSTN,ADA2,BMP5,BMP7,NPPA,CXCL1,TGFA,TGFB2,TGFB3,LEFTY2,THBS4,GDF6,PENK,HMGB2,CHGB,SEMA5B,BMP8A,GDF15,CTF1,CCN2,IL1RN,IL6,IL6R,RLN2
GO: Molecular Function	GO:0030546	signaling receptor activator activity		0.0001708	0.249	0.01577	0.124	38	502	EREG,IL17D,MDK,SAA1,CXCL9,CCL2,FGF7,FGF10,FGF12,CCL11,GPNMB,VEGFD,CSPG5,NDP,MSTN,ADA2,BMP5,BMP7,NPPA,CXCL1,TGFA,TGFB2,TGFB3,LEFTY2,THBS4,GDF6,PENK,HMGB2,CHGB,SEMA5B,BMP8A,GDF15,CTF1,CCN2,IL1RN,IL6,IL6R,RLN2
GO: Molecular Function	GO:0019838	growth factor binding		0.0001746	0.2546	0.01577	0.124	20	199	ERBB3,EREG,CD109,S100A13,FGFR4,NGFR,ESM1,GPRC5A,TGFA,TGFB3,TGFBR3,IL1RL1,PDGFRA,CCN2,IL1RN,IL6R,IL10RA,HTRA1,LTBP1,LTBP2
GO: Molecular Function	GO:0031406	carboxylic acid binding		0.0001839	0.2681	0.01577	0.124	28	329	ACACB,ACTN2,CCL2,LRRC7,SELE,P3H3,SNCA,LAYN,SLC46A1,GCHFR,GNMT,LYVE1,GRIA3,GRID1,GRIK2,GRIK3,GRIN2A,GRM1,SERPINA5,DDAH2,DDAH1,HMGCL,RELN,LCN12,AKR1C1,GRIN3A,P3H2,ST8SIA2
GO: Molecular Function	GO:0030545	receptor regulator activity		0.0002388	0.3482	0.0187	0.147	40	547	EREG,IL17D,MDK,SAA1,CXCL9,CCL2,FGF7,FGF10,FGF12,CCL11,GPNMB,VEGFD,CSPG5,NDP,MSTN,ADA2,BMP5,BMP7,NPPA,CXCL1,TGFA,TGFB2,TGFB3,LEFTY2,THBS4,GDF6,PENK,HMGB2,CHGB,SEMA5B,BMP8A,GDF15,CTF1,CCN2,IGSF1,IL1RN,IL6,IL6R,LYPD1,RLN2
GO: Molecular Function	GO:0008823	cupric reductase activity		0.0002566	0.3741	0.0187	0.147	3	4	STEAP2,STEAP4,STEAP3
GO: Molecular Function	GO:0052851	ferric-chelate reductase (NADPH) activity		0.0002566	0.3741	0.0187	0.147	3	4	STEAP2,STEAP4,STEAP3
GO: Molecular Function	GO:0005126	cytokine receptor binding		0.0004259	0.6209	0.02957	0.2325	26	312	CXCL9,CCL2,CCL11,VEGFD,RASL11B,NES,MSTN,SOCS2,BMP5,BMP7,NGFR,CXCL1,TGFB2,TGFB3,LEFTY2,TGFBR3,GDF6,BMP8A,GDF15,CTF1,IL1RN,IL6,IL6R,DDT,JAK2,EDA
GO: Molecular Function	GO:0008324	cation transmembrane transporter activity		0.0005284	0.7704	0.03455	0.2717	57	898	ACTN2,KCNIP2,SLC24A4,SCN1A,SCN2B,CCL2,FGF12,LRRC7,RHCG,SLC5A1,SLC15A2,ATP1A4,ATP2A2,UNC80,SLC25A45,ATP5ME,ATP6V1G2,SLC46A1,STRIT1,GPD1L,ABCC8,GLRX,SLC9A7,KCNMB4,SLC38A3,NPPA,GRIA3,GRIK2,GRIK3,GRIN2A,TFRC,ATP1B4,P2RX1,P2RX6,COX7A2L,TNNI3,PDE4B,PDE4D,TRPC4,NALCN,FXYD3,HSPA2,COX7A2,COX7B,RELN,SLC30A2,KCNC4,KCNJ4,KCNJ8,KCNK3,KCNMB1,KCNN2,GRIN3A,TMCO3,HCN4,TMEM63C,RHAG
GO: Molecular Function	GO:0008066	glutamate receptor activity		0.00056	0.8164	0.03455	0.2717	11	84	ACTN2,CCL2,LRRC7,GRIA3,GRID1,GRIK2,GRIK3,GRIN2A,GRM1,RELN,GRIN3A
GO: Molecular Function	GO:0015267	channel activity		0.0005747	0.8379	0.03455	0.2717	47	705	ACTN2,KCNIP2,SLC24A4,SCN1A,SCN2B,CCL2,FGF12,LRRC7,LRRC8E,AQP4,AQP9,UNC80,GABRB3,GABRE,BCL2,GPD1L,ABCC8,KCNMB4,NPPA,GRIA3,GRID1,GRIK2,GRIK3,CLIC6,GRIN2A,P2RX1,P2RX6,TNNI3,PDE4B,PDE4D,TRPC4,TMC6,ABCB1,NALCN,FXYD3,RELN,KCNC4,KCNJ4,KCNJ8,KCNK3,KCNMB1,KCNN2,GRIN3A,AQP10,HCN4,TMEM63C,RHAG
GO: Molecular Function	GO:0022803	passive transmembrane transporter activity		0.0005925	0.8638	0.03455	0.2717	47	706	ACTN2,KCNIP2,SLC24A4,SCN1A,SCN2B,CCL2,FGF12,LRRC7,LRRC8E,AQP4,AQP9,UNC80,GABRB3,GABRE,BCL2,GPD1L,ABCC8,KCNMB4,NPPA,GRIA3,GRID1,GRIK2,GRIK3,CLIC6,GRIN2A,P2RX1,P2RX6,TNNI3,PDE4B,PDE4D,TRPC4,TMC6,ABCB1,NALCN,FXYD3,RELN,KCNC4,KCNJ4,KCNJ8,KCNK3,KCNMB1,KCNN2,GRIN3A,AQP10,HCN4,TMEM63C,RHAG
GO: Molecular Function	GO:0051373	FATZ binding		0.0006217	0.9065	0.03486	0.2741	3	5	ACTN2,MYOZ1,MYOZ3
GO: Molecular Function	GO:0019955	cytokine binding		0.0008197	1	0.04426	0.348	17	176	CD109,IL17RB,IL31RA,IL20RA,TGFB3,TGFBR3,IL1RL1,EDA2R,TNFRSF4,HJV,IL1RN,PRLR,IL6R,IL10RA,IFNLR1,ELANE,LTBP1
GO: Molecular Function	GO:0004970	ionotropic glutamate receptor activity		0.0009505	1	0.04921	0.3869	10	76	ACTN2,CCL2,LRRC7,GRIA3,GRID1,GRIK2,GRIK3,GRIN2A,RELN,GRIN3A
GO: Molecular Function	GO:0005230	extracellular ligand-gated ion channel activity		0.001004	1	0.04921	0.3869	14	133	ACTN2,CCL2,LRRC7,GABRB3,GABRE,GRIA3,GRID1,GRIK2,GRIK3,GRIN2A,P2RX1,P2RX6,RELN,GRIN3A
GO: Molecular Function	GO:0016597	amino acid binding		0.001069	1	0.04921	0.3869	15	149	ACTN2,CCL2,LRRC7,GCHFR,GNMT,GRIA3,GRID1,GRIK2,GRIK3,GRIN2A,GRM1,DDAH2,DDAH1,RELN,GRIN3A
GO: Molecular Function	GO:1904315	transmitter-gated ion channel activity involved in regulation of postsynaptic membrane potential		0.00108	1	0.04921	0.3869	8	52	GABRB3,GABRE,GRIA3,GRID1,GRIK2,GRIK3,GRIN2A,GRIN3A
GO: Molecular Function	GO:0042887	amide transmembrane transporter activity		0.00108	1	0.04921	0.3869	8	52	AQP9,SLC15A2,AZGP1,SLC46A1,SLC38A3,SLC19A3,DISP1,AQP10
GO: Molecular Function	GO:0022890	inorganic cation transmembrane transporter activity		0.001131	1	0.04999	0.393	53	847	ACTN2,KCNIP2,SLC24A4,SCN1A,SCN2B,CCL2,FGF12,LRRC7,SLC5A1,SLC15A2,ATP1A4,ATP2A2,UNC80,ATP5ME,ATP6V1G2,SLC46A1,STRIT1,GPD1L,ABCC8,GLRX,SLC9A7,KCNMB4,NPPA,GRIA3,GRIK2,GRIK3,GRIN2A,TFRC,ATP1B4,P2RX1,P2RX6,COX7A2L,TNNI3,PDE4B,PDE4D,TRPC4,NALCN,FXYD3,HSPA2,COX7A2,COX7B,RELN,SLC30A2,KCNC4,KCNJ4,KCNJ8,KCNK3,KCNMB1,KCNN2,GRIN3A,TMCO3,HCN4,TMEM63C
GO: Biological Process	GO:0003012	muscle system process		1.278e-08	8.758e-05	8.758e-05	0.0008241	49	523	ACTA1,ACTN2,KCNIP2,F2R,SCN1A,SCN2B,GTF2IRD2,FGF12,SORBS2,PI16,SGCD,INPP5F,LMOD2,MYL12A,ATP2A2,MYH6,MYL2,MYL5,GATM,C12orf57,MSTN,STRIT1,GPD1L,ABCC8,NPPA,CAMK2B,P2RX1,P2RX6,HEY2,TNNI3,TNNT1,TPM3,PDE4B,PDE4D,HMOX1,MYL7,MYOZ1,GATA5,HSPB6,CCN2,PTGS1,PTGS2,KCNJ8,KCNN2,TBX20,HCN4,NR4A3,ACE2,PLCE1
GO: Biological Process	GO:0006811	ion transport		2.601e-08	0.0001783	8.914e-05	0.0008388	124	1956	ACACB,ACTN2,KCNIP2,F2R,ADCYAP1R1,S100A6,FCER1A,SLC24A4,SCN1A,SCN2B,CXCL9,CCL2,FGF12,LRRC7,FGFR4,SYT13,LRRC8E,RHCG,SFRP4,SLC25A5,SLC27A6,PPFIA4,UQCC2,APOE,AQP9,SLC1A7,SLC5A1,ARHGAP1,SLC15A2,SLCO2A1,DHRS7C,RACGAP1,MPC1,UQCRQ,SNCA,ATP1A4,ATP2A2,UNC80,SLC16A10,SLC25A45,GABRB3,GABRE,ATP5ME,ATP6V1G2,CPLX1,SLC46A1,BCL2,STRIT1,GPD1L,PER2,ABCC8,GLRX,SLC9A7,KCNMB4,SLC38A3,CA3,NPPA,CAMK2B,CAPN3,SLC19A3,GRIA…
GO: Biological Process	GO:0008015	blood circulation		3.17e-07	0.002173	0.0004428	0.004167	51	615	KCNIP2,F2R,F5,SCN1A,SCN2B,FGF12,SGCD,SGCG,APOE,CORIN,ATP1A4,ATP2A2,MYH6,MYL2,BBS4,STRIT1,GPD1L,PER2,KCNMB4,GNB3,NPPA,NPR3,TGFB2,TGFBR3,P2RX1,P2RY2,HEY2,TNNI3,TNNT1,HBB,PDE4B,PDE4D,DDAH1,HMOX1,FXYD3,CCN2,CTSG,CYP2J2,PTGS1,PTGS2,JAK2,MYLK3,KCNJ4,KCNJ8,KCNK3,KCNMB1,KCNN2,TBX20,HCN4,RENBP,ACE2
GO: Biological Process	GO:0009968	negative regulation of signal transduction		3.537e-07	0.002425	0.0004428	0.004167	98	1513	ERBB3,EREG,TBC1D7,CD109,MDK,ADCY1,H2BC21,PLIN5,FGF10,C1QTNF3,ARRDC3,FHL2,SFRP4,SLC25A5,INPP5F,APOE,ARNTL,FRZB,DACT3,DLK2,RASL11B,SNCA,FAIM2,IFI6,MARCO,RGS11,DLK1,BCL2,SSTR5,MSTN,GPD1L,SOCS2,BMP5,BMP7,GLRX,CASTOR3,NGFR,WWC1,NPR3,CAMK2B,GRK5,SOCS3,GRB7,GRB14,SHISA2,GRIK3,GPRC5A,RUNX2,CBLN1,TGFA,TGFB2,TGFB3,TGFBR3,GTF2H2,THY1,HEY2,IL1RL1,PDE4B,PDE4D,DHRS3,HMGB2,HMOX1,PPP1R15A,TNFRSF4,PIK3IP1,DUSP26,…
GO: Biological Process	GO:0044057	regulation of system process		4.077e-07	0.002795	0.0004428	0.004167	57	727	KCNIP2,F2R,FCGR3A,SCN2B,GTF2IRD2,FGF10,FGF12,C1QTNF3,FGFR4,PI16,CORIN,ATP1A4,ATP2A2,MYH6,MYL2,MYL5,C12orf57,MSTN,STRIT1,GPD1L,PER2,ABCC8,NGFR,KCNMB4,NPPA,CUX2,NPTX2,CAMK2B,GRIN2A,GRM1,CBLN1,TGFB2,P2RX1,HEY2,TNNI3,TNNT1,PDE4B,PDE4D,FXYD3,GATA5,HSPB6,CCN2,IL6,RAB11FIP3,RELN,CYP2J2,PTGS1,PTGS2,JAK2,KCNC4,KCNJ4,KCNK3,KCNN2,HCN4,NR4A3,ACE2,PLCE1
GO: Biological Process	GO:0003013	circulatory system process		4.923e-07	0.003374	0.0004428	0.004167	51	624	KCNIP2,F2R,F5,SCN1A,SCN2B,FGF12,SGCD,SGCG,APOE,CORIN,ATP1A4,ATP2A2,MYH6,MYL2,BBS4,STRIT1,GPD1L,PER2,KCNMB4,GNB3,NPPA,NPR3,TGFB2,TGFBR3,P2RX1,P2RY2,HEY2,TNNI3,TNNT1,HBB,PDE4B,PDE4D,DDAH1,HMOX1,FXYD3,CCN2,CTSG,CYP2J2,PTGS1,PTGS2,JAK2,MYLK3,KCNJ4,KCNJ8,KCNK3,KCNMB1,KCNN2,TBX20,HCN4,RENBP,ACE2
GO: Biological Process	GO:0035633	maintenance of permeability of blood-brain barrier		5.088e-07	0.003488	0.0004428	0.004167	5	6	MBP,ABCC8,IL6,PTGS1,PTGS2
GO: Biological Process	GO:0034220	ion transmembrane transport		5.859e-07	0.004016	0.0004428	0.004167	95	1469	ACACB,ACTN2,KCNIP2,F2R,S100A6,SLC24A4,SCN1A,SCN2B,CXCL9,CCL2,FGF12,LRRC7,LRRC8E,RHCG,SLC25A5,UQCC2,AQP9,SLC1A7,SLC5A1,SLC15A2,SLCO2A1,DHRS7C,MPC1,UQCRQ,SNCA,ATP1A4,ATP2A2,UNC80,SLC16A10,SLC25A45,GABRB3,GABRE,ATP5ME,ATP6V1G2,SLC46A1,STRIT1,GPD1L,PER2,ABCC8,GLRX,SLC9A7,KCNMB4,SLC38A3,NPPA,CAPN3,SLC19A3,GRIA3,GRID1,GRIK2,GRIK3,CLIC6,GRIN2A,TFRC,TGFB2,ATP1B4,THY1,P2RX1,P2RX6,ISCU,COX7A2L,TNNI3,PDE4B,…
GO: Biological Process	GO:0010648	negative regulation of cell communication		5.86e-07	0.004017	0.0004428	0.004167	103	1632	ERBB3,EREG,TBC1D7,CD109,MDK,ADCY1,H2BC21,PLIN5,FGF10,C1QTNF3,ARRDC3,FHL2,SFRP4,SLC25A5,INPP5F,APOE,ARNTL,FRZB,DACT3,DLK2,RASL11B,SNCA,FAIM2,IFI6,MARCO,RGS11,DLK1,BCL2,SSTR5,MSTN,GPD1L,SOCS2,BMP5,BMP7,ABCC8,GLRX,CASTOR3,NGFR,WWC1,NPR3,CAMK2B,GRK5,SOCS3,GRB7,GRB14,SHISA2,GRIK2,GRIK3,GPRC5A,RUNX2,CBLN1,TGFA,TGFB2,TGFB3,TGFBR3,GTF2H2,THY1,HEY2,IL1RL1,PDE4B,PDE4D,DHRS3,HMGB2,HMOX1,PPP1R15A,TNFRSF4,PIK…
GO: Biological Process	GO:0023057	negative regulation of signaling		6.569e-07	0.004503	0.0004428	0.004167	103	1636	ERBB3,EREG,TBC1D7,CD109,MDK,ADCY1,H2BC21,PLIN5,FGF10,C1QTNF3,ARRDC3,FHL2,SFRP4,SLC25A5,INPP5F,APOE,ARNTL,FRZB,DACT3,DLK2,RASL11B,SNCA,FAIM2,IFI6,MARCO,RGS11,DLK1,BCL2,SSTR5,MSTN,GPD1L,SOCS2,BMP5,BMP7,ABCC8,GLRX,CASTOR3,NGFR,WWC1,NPR3,CAMK2B,GRK5,SOCS3,GRB7,GRB14,SHISA2,GRIK2,GRIK3,GPRC5A,RUNX2,CBLN1,TGFA,TGFB2,TGFB3,TGFBR3,GTF2H2,THY1,HEY2,IL1RL1,PDE4B,PDE4D,DHRS3,HMGB2,HMOX1,PPP1R15A,TNFRSF4,PIK…
GO: Biological Process	GO:0022008	neurogenesis		7.106e-07	0.004871	0.0004428	0.004167	114	1867	ERBB3,MAP2,MAP4,CDHR1,ETV4,EXT1,ATAT1,MDK,KCNIP2,ADCY1,S100A6,CCL2,FGF10,LRRC7,CCL11,VEGFD,CAMSAP3,INPP5F,APOE,ALKAL2,CPNE5,ZNF365,EFHC2,ARNTL,EFHD1,CSPG5,RACGAP1,CORIN,SMARCD3,UQCRQ,BRSK1,FAIM2,PHACTR1,CHL1,GABRB3,DOK5,SOX15,SPOCK1,SRRM4,STK26,BBS4,BCL2,C12orf57,SOCS2,PROM1,BMP5,BMP7,PER2,ABCC8,NGFR,C3,DCLK2,SDK1,ADGRL3,DDR1,CUX2,NPTX2,CAMK2B,VXN,GRB7,CRPPA,GRIN2A,RUNX2,CBLN1,TGFB2,THBS4,THY1,P2…
GO: Biological Process	GO:0070252	actin-mediated cell contraction		9.545e-07	0.006543	0.0005453	0.005131	19	133	ACTA1,ACTN2,SCN1A,SCN2B,FGF12,SGCD,ATP2A2,MYH6,MYL2,STRIT1,GPD1L,TNNI3,TNNT1,TPM3,PDE4B,PDE4D,KCNJ8,KCNN2,HCN4
GO: Biological Process	GO:0048585	negative regulation of response to stimulus		1.165e-06	0.007984	0.0006142	0.005779	116	1928	ERBB3,EREG,TBC1D7,CD109,MDK,ADCY1,SAA1,H2BC21,PLIN5,CCL2,FGF10,C1QTNF3,ARRDC3,FHL2,SFRP4,SLC25A5,SHLD1,INPP5F,APOE,ARNTL,FRZB,DACT3,DLK2,RASL11B,SNCA,FAIM2,IFI6,MARCO,BBS4,RGS11,DLK1,BCL2,SSTR5,MSTN,GPD1L,SOCS2,BMP5,BMP7,ABCC8,GLRX,CASTOR3,NGFR,MICA,WWC1,NPR3,CAMK2B,GRK5,SOCS3,GRB7,GRB14,SHISA2,GRIK3,GPRC5A,RUNX2,CBLN1,TGFA,TGFB2,TGFB3,HAVCR2,TGFBR3,GTF2H2,THY1,HEY2,IL1RL1,PDE4B,PDE4D,DDAH1,HK3,D…
GO: Biological Process	GO:0006936	muscle contraction		1.391e-06	0.009534	0.000681	0.006408	36	388	ACTA1,ACTN2,KCNIP2,F2R,SCN1A,SCN2B,FGF12,SGCD,LMOD2,MYL12A,ATP2A2,MYH6,MYL2,MYL5,C12orf57,STRIT1,GPD1L,NPPA,P2RX1,P2RX6,TNNI3,TNNT1,TPM3,PDE4B,PDE4D,MYL7,HSPB6,CCN2,PTGS1,PTGS2,KCNJ8,KCNN2,TBX20,HCN4,ACE2,PLCE1
GO: Biological Process	GO:0048699	generation of neurons		1.629e-06	0.01116	0.0007443	0.007004	107	1752	MAP2,MAP4,CDHR1,ETV4,EXT1,ATAT1,MDK,KCNIP2,ADCY1,S100A6,LRRC7,CCL11,VEGFD,CAMSAP3,INPP5F,APOE,ALKAL2,CPNE5,ZNF365,EFHC2,ARNTL,EFHD1,RACGAP1,CORIN,SMARCD3,UQCRQ,BRSK1,FAIM2,PHACTR1,CHL1,GABRB3,DOK5,SOX15,SPOCK1,SRRM4,STK26,BBS4,BCL2,C12orf57,SOCS2,PROM1,BMP5,BMP7,PER2,ABCC8,NGFR,C3,DCLK2,SDK1,ADGRL3,DDR1,CUX2,NPTX2,CAMK2B,VXN,GRB7,CRPPA,RUNX2,CBLN1,TGFB2,THBS4,THY1,P2RY2,HEY2,MTURN,ARHGAP33,PCNT,S…
GO: Biological Process	GO:0055085	transmembrane transport		2.406e-06	0.01649	0.001007	0.00948	110	1830	ERBB3,ACACB,ACTN2,KCNIP2,F2R,S100A6,SLC24A4,SLC44A5,SCN1A,SCN2B,CXCL9,CCL2,FGF12,LRRC7,LRRC8E,RHCG,SLC25A5,UQCC2,AQP4,AQP9,SLC1A7,SLC5A1,AZIN1,SLC15A2,SLCO2A1,DHRS7C,MPC1,UQCRQ,SNCA,ATP1A4,ATP2A2,UNC80,SLC16A10,SLC25A45,GABRB3,GABRE,ATP5ME,ATP6V1G2,AZGP1,CPLX1,SLC46A1,BCL2,STRIT1,GPD1L,PER2,ABCC8,GLRX,SLC9A7,C3,KCNMB4,SLC38A3,NPPA,CAPN3,SLC19A3,GRIA3,GRID1,GRIK2,GRIK3,CLIC6,GRIN2A,TFRC,TGFB2,ATP1…
GO: Biological Process	GO:0042391	regulation of membrane potential		2.498e-06	0.01713	0.001007	0.00948	43	517	ACTN2,KCNIP2,SCN1A,SCN2B,FGF12,MTLN,SNCA,ATP1A4,ATP2A2,IFI6,GABRB3,GABRE,BCL2,GPD1L,GLRX,NGFR,KCNMB4,MLLT11,NPPA,CUX2,GRIA3,GRID1,GRIK2,GRIK3,GRIN2A,GRM1,CBLN1,P2RX1,P2RX6,PDE4D,UBB,NALCN,IL1RN,IL6,RELN,KCNC4,KCNJ8,KCNK3,KCNN2,GRIN3A,ATP5IF1,HCN4,RNF122
GO: Biological Process	GO:0050801	ion homeostasis		3.22e-06	0.02207	0.001226	0.01154	64	909	F2R,F2RL2,ADCYAP1R1,SAA1,SLC24A4,SCN2B,CXCL9,CCL2,FGF12,CCL11,FGFR4,RHCG,SFRP4,SGCD,APOE,RAB20,DHRS7C,MTLN,CORIN,SNCA,ATP1A4,ATP2A2,IFI6,UNC80,ATP6V1G2,SLC46A1,BCL2,GPD1L,NGFR,SLC9A7,MLLT11,C7,CAPN3,GRIK2,GRIN2A,GRM1,TFRC,TGFB2,THY1,P2RX1,P2RY2,ISCU,TNNI3,SNAPIN,PDE4D,PDGFRA,PDK4,SLC26A4,TRPC4,CA14,HMOX1,HMOX2,HJV,STEAP2,SLC30A2,JAK2,KCNK3,HCN4,STEAP4,S1PR3,RHAG,ELANE,STEAP3,PLCE1
GO: Biological Process	GO:0030048	actin filament-based movement		3.43e-06	0.02351	0.001238	0.01165	20	158	ACTA1,ACTN2,SCN1A,SCN2B,FGF12,SGCD,ATP2A2,MYH6,MYL2,STRIT1,GPD1L,TNNI3,TNNT1,TPM3,PDE4B,PDE4D,WIPF3,KCNJ8,KCNN2,HCN4
GO: Biological Process	GO:0060047	heart contraction		4.812e-06	0.03299	0.001649	0.01552	30	311	KCNIP2,SCN1A,SCN2B,FGF12,SGCD,SGCG,CORIN,ATP1A4,ATP2A2,MYH6,MYL2,STRIT1,GPD1L,NPPA,TGFB2,HEY2,TNNI3,TNNT1,PDE4B,PDE4D,FXYD3,CCN2,CYP2J2,JAK2,KCNJ4,KCNJ8,KCNK3,KCNN2,HCN4,ACE2
GO: Biological Process	GO:0060048	cardiac muscle contraction		6.54e-06	0.04483	0.002135	0.02009	19	151	SCN1A,SCN2B,FGF12,SGCD,ATP2A2,MYH6,MYL2,STRIT1,GPD1L,NPPA,TNNI3,TNNT1,PDE4B,PDE4D,CCN2,KCNJ8,KCNN2,HCN4,ACE2
GO: Biological Process	GO:0046903	secretion		7.747e-06	0.05311	0.002414	0.02271	108	1835	ERBB3,MBP,CD109,ACTN2,MDK,F2R,F5,ADCY1,F13A1,S100A13,SAA1,FCER1A,MGST1,FGF7,FGF10,LRRC7,C1QTNF3,FGFR4,ALDH3B1,VEGFD,SYT13,IL17RB,SLC25A5,SCG5,PPFIA4,UQCC2,APOE,AQP9,SLC1A7,FRK,ARNTL,STXBP6,CSPG5,NSG1,CORIN,SNCA,BRSK1,MCTP2,ATP2A2,SLC16A10,SIGLEC9,EXPH5,CPLX1,UNC13D,CCND1,SSTR5,ADA2,ARID5A,SOCS2,RAB24,PER2,ABCC8,GLRX,C3,KCNMB4,DDR1,NPPA,NPR3,GPR27,CBLN1,CXCL1,TGFB2,TGFB3,LEFTY2,HAVCR2,P2RX1,P2RY2,…
GO: Biological Process	GO:0003015	heart process		8.481e-06	0.05814	0.002528	0.02379	30	320	KCNIP2,SCN1A,SCN2B,FGF12,SGCD,SGCG,CORIN,ATP1A4,ATP2A2,MYH6,MYL2,STRIT1,GPD1L,NPPA,TGFB2,HEY2,TNNI3,TNNT1,PDE4B,PDE4D,FXYD3,CCN2,CYP2J2,JAK2,KCNJ4,KCNJ8,KCNK3,KCNN2,HCN4,ACE2
GO: Biological Process	GO:0048646	anatomical structure formation involved in morphogenesis		1.045e-05	0.0716	0.002983	0.02807	85	1365	EREG,ACTA1,MBP,SYNPO2L,CD109,MCAM,EXT1,ACTN2,RRAS,MDK,MFAP2,SLC24A4,CXCL9,CCL2,FGF10,CCL11,FGFR4,GPNMB,FHL2,VEGFD,SHB,LMOD2,SMARCD3,FAIM2,MYH6,MYL2,BBS4,UNC13D,SMOC2,PROM1,BMP5,BMP7,ABCC8,NGFR,C3,C6,SDK1,CAPN3,ESM1,SH2D2A,CBLN1,TGFA,TGFB2,TGFB3,TGFBR3,THBS4,THY1,DYRK1B,HEY2,TNNT1,DDAH1,PDGFRA,ENPP2,HMOX1,MYOZ1,CTHRC1,GDF15,GATA5,IRX6,IRX1,SYF2,HSPB6,CCN2,IL1RN,MAP2K5,IL6,RELN,HTRA1,RIPOR2,ARHGAP2…
GO: Biological Process	GO:0007167	enzyme linked receptor protein signaling pathway		1.102e-05	0.07556	0.003022	0.02844	73	1123	CNKSR1,ERBB3,EREG,CD109,CCL2,FGF7,FGF10,NCEH1,FGF12,FGFR4,VEGFD,IL31RA,SFRP4,FMOD,SHB,FRK,RASL11B,SNCA,IFI6,DOK5,MYH6,ATP6V1G2,FRS3,SMOC2,MSTN,SOCS2,BMP5,BMP7,GLRX,NGFR,DDR1,NPPA,SOCS3,GRB7,GRB14,ESM1,SHISA2,SH2D2A,GPRC5A,RUNX2,TGFA,TGFB2,TGFB3,LEFTY2,TGFBR3,REPS2,PDGFRA,PDK4,GDF6,UBB,BMP8A,HJV,CHRDL2,GDF15,SH3KBP1,CTF1,CCN2,IGSF1,PRLR,HTRA1,ASPN,GAB2,JAK2,PTPRR,TBX20,NR4A3,DUSP15,STMN1,PTPRU,LTB…
GO: Biological Process	GO:0000165	MAPK cascade		1.282e-05	0.08791	0.003381	0.03182	69	1048	ERBB3,EREG,MBP,ACTN2,RRAS,F2R,SAA1,FCER1A,CCL2,FGF7,FGF10,FGF12,LRRC7,C1QTNF3,CCL11,FGFR4,GPNMB,IL31RA,SFRP4,APOE,ALKAL2,SH3RF3,MARCO,DOK5,GADD45B,STK26,FRS3,MSTN,BMP5,BMP7,GADD45G,NGFR,C3,WWC1,GRIK2,GRM1,TGFA,TGFB2,TGFB3,LEFTY2,HAVCR2,TGFBR3,EDA2R,TPD52L1,PDGFRA,GDF6,DUSP26,UBB,UCHL1,PLA2G2A,BMP8A,MDFIC,MAP3K8,GDF15,CCN2,IL1RN,MAP2K5,IL6,IL6R,GADD45A,DDT,JAK2,PTPRR,LBH,DUSP15,APIP,ACE2,ELANE,PLC…
GO: Biological Process	GO:0043408	regulation of MAPK cascade		1.539e-05	0.1055	0.003907	0.03676	59	857	RRAS,F2R,SAA1,FCER1A,CCL2,FGF10,C1QTNF3,CCL11,FGFR4,GPNMB,SFRP4,APOE,ALKAL2,SH3RF3,MARCO,DOK5,GADD45B,MSTN,BMP5,BMP7,GADD45G,NGFR,C3,WWC1,GRIK2,GRM1,TGFA,TGFB2,TGFB3,LEFTY2,HAVCR2,TGFBR3,EDA2R,TPD52L1,PDGFRA,GDF6,DUSP26,UBB,UCHL1,PLA2G2A,BMP8A,MDFIC,MAP3K8,GDF15,CCN2,IL1RN,MAP2K5,IL6,IL6R,GADD45A,DDT,JAK2,PTPRR,LBH,DUSP15,APIP,ACE2,ELANE,PLCE1
GO: Biological Process	GO:0098655	cation transmembrane transport		1.724e-05	0.1182	0.004221	0.03972	73	1138	ACTN2,KCNIP2,F2R,SLC24A4,SCN1A,SCN2B,CXCL9,CCL2,FGF12,LRRC7,RHCG,UQCC2,SLC5A1,SLC15A2,DHRS7C,UQCRQ,SNCA,ATP1A4,ATP2A2,UNC80,SLC25A45,ATP5ME,ATP6V1G2,SLC46A1,STRIT1,GPD1L,ABCC8,GLRX,SLC9A7,KCNMB4,SLC38A3,NPPA,CAPN3,GRIA3,GRIK2,GRIK3,GRIN2A,TFRC,TGFB2,ATP1B4,THY1,P2RX1,P2RX6,ISCU,COX7A2L,TNNI3,PDE4B,PDE4D,TRPC4,NALCN,FXYD3,HSPA2,COX7A2,COX7B,NDUFA11,RELN,STEAP2,SLC30A2,KCNC4,KCNJ4,KCNJ8,KCNK3,KCNMB…
GO: Biological Process	GO:0001934	positive regulation of protein phosphorylation		1.828e-05	0.1253	0.004238	0.03988	73	1140	ERBB3,EREG,F2R,ADCY1,SAA1,FCER1A,CCL2,FGF7,FGF10,C1QTNF3,CCL11,FGFR4,GPNMB,VEGFD,IL31RA,APOE,ALKAL2,SNCA,SH3RF3,MARCO,DOK5,GADD45B,STK26,CCND1,BCL2,MSTN,BMP5,BMP7,GADD45G,NGFR,C3,WWC1,DOK7,SOCS3,GPRC5A,GRM1,TGFA,TGFB2,TGFB3,LEFTY2,HAVCR2,THBS4,EDA2R,TPD52L1,PDGFRA,ENPP2,GDF6,PPP1R15A,UBB,CLU,PLA2G2A,BMP8A,HSPA2,MDFIC,MAP3K8,GDF15,CLIP3,LRRN3,CTF1,CCN2,IL1RN,MAP2K5,IL6,PRLR,IL6R,RELN,PTGS2,GADD45A…
GO: Biological Process	GO:0023014	signal transduction by protein phosphorylation		1.855e-05	0.1272	0.004238	0.03988	69	1060	ERBB3,EREG,MBP,ACTN2,RRAS,F2R,SAA1,FCER1A,CCL2,FGF7,FGF10,FGF12,LRRC7,C1QTNF3,CCL11,FGFR4,GPNMB,IL31RA,SFRP4,APOE,ALKAL2,SH3RF3,MARCO,DOK5,GADD45B,STK26,FRS3,MSTN,BMP5,BMP7,GADD45G,NGFR,C3,WWC1,GRIK2,GRM1,TGFA,TGFB2,TGFB3,LEFTY2,HAVCR2,TGFBR3,EDA2R,TPD52L1,PDGFRA,GDF6,DUSP26,UBB,UCHL1,PLA2G2A,BMP8A,MDFIC,MAP3K8,GDF15,CCN2,IL1RN,MAP2K5,IL6,IL6R,GADD45A,DDT,JAK2,PTPRR,LBH,DUSP15,APIP,ACE2,ELANE,PLC…
GO: Biological Process	GO:0140352	export from cell		2.257e-05	0.1547	0.00499	0.04696	101	1731	MBP,CD109,ACTN2,MDK,KCNIP2,F2R,F5,ADCY1,F13A1,S100A13,SAA1,FCER1A,MGST1,FGF7,FGF10,LRRC7,C1QTNF3,FGFR4,ALDH3B1,VEGFD,SYT13,IL17RB,SLC25A5,SCG5,PPFIA4,UQCC2,APOE,SLC1A7,FRK,ARNTL,STXBP6,SLC15A2,CSPG5,NSG1,SNCA,BRSK1,ATP1A4,MCTP2,ATP2A2,SLC16A10,SIGLEC9,EXPH5,CPLX1,UNC13D,SSTR5,ADA2,ARID5A,RAB24,PER2,ABCC8,GLRX,C3,KCNMB4,NPPA,GPR27,CBLN1,CXCL1,TGFB2,TGFB3,LEFTY2,HAVCR2,P2RX1,P2RY2,IL1RL1,HBB,DISP1,…
GO: Biological Process	GO:0042327	positive regulation of phosphorylation		2.911e-05	0.1996	0.006199	0.05834	75	1197	ERBB3,EREG,F2R,ADCY1,SAA1,FCER1A,CCL2,FGF7,FGF10,C1QTNF3,CCL11,FGFR4,GPNMB,VEGFD,IL31RA,APOE,ALKAL2,SNCA,SH3RF3,MARCO,DOK5,GADD45B,STK26,CCND1,BCL2,MSTN,BMP5,BMP7,GADD45G,NGFR,C3,WWC1,GPD1,DOK7,SOCS3,GPRC5A,GRM1,TGFA,TGFB2,TGFB3,LEFTY2,HAVCR2,THBS4,ISCU,EDA2R,TPD52L1,PDGFRA,ENPP2,GDF6,PPP1R15A,UBB,CLU,PLA2G2A,BMP8A,HSPA2,MDFIC,MAP3K8,GDF15,CLIP3,LRRN3,CTF1,CCN2,IL1RN,MAP2K5,IL6,PRLR,IL6R,RELN,PTG…
GO: Biological Process	GO:0055001	muscle cell development		2.984e-05	0.2046	0.006199	0.05834	23	228	ACTA1,SYNPO2L,ACTN2,FHL2,SORBS2,PI16,SGCD,LMOD2,ATP2A2,MYH6,MYL2,NACA,BCL2,NPPA,CAPN3,HEY2,TNNT1,PDGFRA,MYOZ1,UCHL1,RIPOR2,MYLK3,KRT19
GO: Biological Process	GO:0055002	striated muscle cell development		3.077e-05	0.2109	0.006204	0.05838	22	213	ACTA1,SYNPO2L,ACTN2,FHL2,SORBS2,PI16,SGCD,LMOD2,MYH6,MYL2,NACA,BCL2,NPPA,CAPN3,HEY2,TNNT1,PDGFRA,MYOZ1,UCHL1,RIPOR2,MYLK3,KRT19
GO: Biological Process	GO:0048871	multicellular organismal homeostasis		3.244e-05	0.2224	0.006239	0.05871	41	537	ACACB,CDHR1,F2R,ADCY1,CRACD,MFAP2,FCGR3A,FGF7,ARRDC3,AQP4,ARNTL,AZGP1,GATM,IL20RA,BBS4,DLK1,BCL2,ARMS2,PROM1,GADD45G,PER2,NPR3,ADAMTS5,TFRC,PDK4,CYTL1,UBB,BMP8A,COL9A1,G0S2,CCN2,IL1RN,IL6,PRLR,PTGS2,JAK2,PCDH15,DIO2,NR4A3,STMN1,RHAG
GO: Biological Process	GO:0032940	secretion by cell		3.276e-05	0.2246	0.006239	0.05871	98	1683	MBP,CD109,ACTN2,MDK,F2R,F5,ADCY1,F13A1,S100A13,SAA1,FCER1A,MGST1,FGF7,FGF10,LRRC7,C1QTNF3,FGFR4,ALDH3B1,VEGFD,SYT13,IL17RB,SLC25A5,SCG5,PPFIA4,UQCC2,APOE,SLC1A7,FRK,ARNTL,STXBP6,CSPG5,NSG1,SNCA,BRSK1,MCTP2,ATP2A2,SLC16A10,SIGLEC9,EXPH5,CPLX1,UNC13D,SSTR5,ADA2,ARID5A,RAB24,PER2,ABCC8,GLRX,C3,KCNMB4,NPPA,GPR27,CBLN1,CXCL1,TGFB2,TGFB3,LEFTY2,HAVCR2,P2RX1,P2RY2,IL1RL1,HBB,DISP1,SNAPIN,HK3,TMC6,HMOX1,…
GO: Biological Process	GO:1903522	regulation of blood circulation		3.398e-05	0.233	0.006296	0.05925	30	344	KCNIP2,F2R,SCN2B,CORIN,ATP1A4,ATP2A2,MYH6,MYL2,STRIT1,GPD1L,PER2,KCNMB4,NPPA,TGFB2,P2RX1,HEY2,TNNI3,PDE4B,PDE4D,FXYD3,CCN2,CYP2J2,PTGS1,PTGS2,JAK2,KCNJ4,KCNK3,KCNN2,HCN4,ACE2
GO: Biological Process	GO:0030029	actin filament-based process		4.287e-05	0.2939	0.007598	0.07149	56	829	ACTA1,SYNPO2L,ACTN2,MDK,CRACD,SCN1A,SCN2B,FGF7,FGF10,FGF12,CCL11,SELE,SORBS2,SGCD,LMOD2,RND3,RACGAP1,FSCN1,ATP2A2,SMTNL2,PHACTR1,MYH6,MYL2,BBS4,BCL2,STRIT1,GPD1L,CAMK2B,CAPN3,CXCL1,TGFB2,TGFB3,TNNI3,TNNT1,FRMD3,TPM3,PDE4B,PDE4D,PDGFRA,WIPF3,PFDN1,MYOZ1,SH3KBP1,CCN2,AIF1L,ITPKA,JAK2,MYLK3,RHOBTB1,KCNJ8,PCDH15,KCNN2,HCN4,KRT19,STMN1,FARP1
GO: Biological Process	GO:0042325	regulation of phosphorylation		4.323e-05	0.2963	0.007598	0.07149	102	1781	ERBB3,EREG,CD109,RRAS,F2R,ADCY1,SAA1,FCER1A,CCL2,FGF7,FGF10,C1QTNF3,CCL11,FGFR4,GPNMB,VEGFD,IL31RA,SFRP4,SHB,UQCC2,INPP5F,APOE,ALKAL2,SNCA,SH3RF3,MARCO,PHACTR1,DOK5,GADD45B,STK26,CCND1,BCL2,MSTN,BLM,GPD1L,SOCS2,BMP5,BMP7,GADD45G,NGFR,C3,WWC1,GPD1,DOK7,SOCS3,GRIK2,GPRC5A,GRM1,TGFA,TGFB2,TGFB3,LEFTY2,HAVCR2,PKIG,TGFBR3,THBS4,THY1,ISCU,COX7A2L,NUP188,EDA2R,TPD52L1,PDE4D,PDGFRA,ENPP2,GDF6,PPP1R15A,TN…
GO: Biological Process	GO:0010562	positive regulation of phosphorus metabolic process		4.751e-05	0.3257	0.007943	0.07475	78	1277	ERBB3,EREG,F2R,ADCY1,ADCYAP1R1,SAA1,FCER1A,CCL2,FGF7,FGF10,C1QTNF3,CCL11,FGFR4,GPNMB,VEGFD,IL31RA,APOE,ALKAL2,SNCA,SH3RF3,MARCO,DOK5,GADD45B,STK26,CCND1,BCL2,MSTN,BMP5,BMP7,GADD45G,NGFR,C3,WWC1,GPD1,DOK7,SOCS3,GPRC5A,GRM1,TGFA,TGFB2,TGFB3,LEFTY2,HAVCR2,THBS4,ISCU,EDA2R,TPD52L1,PDGFRA,ENPP2,GDF6,PPP1R15A,DUSP26,UBB,CLU,PLA2G2A,BMP8A,HSPA2,MDFIC,MAP3K8,GDF15,CLIP3,LRRN3,CTF1,CCN2,IL1RN,MAP2K5,IL6,P…
GO: Biological Process	GO:0045937	positive regulation of phosphate metabolic process		4.751e-05	0.3257	0.007943	0.07475	78	1277	ERBB3,EREG,F2R,ADCY1,ADCYAP1R1,SAA1,FCER1A,CCL2,FGF7,FGF10,C1QTNF3,CCL11,FGFR4,GPNMB,VEGFD,IL31RA,APOE,ALKAL2,SNCA,SH3RF3,MARCO,DOK5,GADD45B,STK26,CCND1,BCL2,MSTN,BMP5,BMP7,GADD45G,NGFR,C3,WWC1,GPD1,DOK7,SOCS3,GPRC5A,GRM1,TGFA,TGFB2,TGFB3,LEFTY2,HAVCR2,THBS4,ISCU,EDA2R,TPD52L1,PDGFRA,ENPP2,GDF6,PPP1R15A,DUSP26,UBB,CLU,PLA2G2A,BMP8A,HSPA2,MDFIC,MAP3K8,GDF15,CLIP3,LRRN3,CTF1,CCN2,IL1RN,MAP2K5,IL6,P…
GO: Biological Process	GO:0030182	neuron differentiation		5.71e-05	0.3914	0.008467	0.07967	92	1579	MAP2,MAP4,CDHR1,ETV4,EXT1,ATAT1,MDK,KCNIP2,ADCY1,S100A6,LRRC7,VEGFD,CAMSAP3,INPP5F,APOE,ALKAL2,CPNE5,ZNF365,EFHC2,EFHD1,CORIN,UQCRQ,BRSK1,FAIM2,PHACTR1,CHL1,GABRB3,DOK5,SOX15,SPOCK1,SRRM4,STK26,BBS4,BCL2,C12orf57,SOCS2,PROM1,BMP5,BMP7,NGFR,C3,DCLK2,SDK1,DDR1,CUX2,NPTX2,CAMK2B,VXN,GRB7,CRPPA,RUNX2,CBLN1,TGFB2,THBS4,THY1,P2RY2,HEY2,MTURN,ARHGAP33,SNAPIN,GDF6,UBB,SERPINE2,SEMA5B,CLU,UCHL1,CTHRC1,PLP…
GO: Biological Process	GO:0098771	inorganic ion homeostasis		5.746e-05	0.3939	0.008467	0.07967	56	838	F2R,F2RL2,ADCYAP1R1,SAA1,SLC24A4,CXCL9,CCL2,CCL11,FGFR4,RHCG,SFRP4,SGCD,APOE,RAB20,DHRS7C,MTLN,CORIN,SNCA,ATP1A4,ATP2A2,ATP6V1G2,SLC46A1,BCL2,SLC9A7,C7,CAPN3,GRIK2,GRIN2A,GRM1,TFRC,TGFB2,THY1,P2RX1,P2RY2,ISCU,TNNI3,SNAPIN,PDE4D,PDGFRA,PDK4,SLC26A4,TRPC4,CA14,HMOX1,HMOX2,HJV,STEAP2,SLC30A2,JAK2,KCNK3,STEAP4,S1PR3,RHAG,ELANE,STEAP3,PLCE1
GO: Biological Process	GO:0014888	striated muscle adaptation		5.776e-05	0.3959	0.008467	0.07967	11	68	ACTA1,GTF2IRD2,INPP5F,ATP2A2,MYH6,MSTN,NPPA,CAMK2B,HEY2,TNNT1,MYOZ1
GO: Biological Process	GO:0043410	positive regulation of MAPK cascade		5.793e-05	0.3971	0.008467	0.07967	44	607	F2R,SAA1,FCER1A,CCL2,FGF10,C1QTNF3,CCL11,FGFR4,GPNMB,APOE,ALKAL2,SH3RF3,MARCO,DOK5,GADD45B,GADD45G,NGFR,C3,WWC1,GRM1,TGFA,TGFB2,TGFB3,HAVCR2,EDA2R,TPD52L1,PDGFRA,GDF6,UBB,PLA2G2A,MDFIC,MAP3K8,GDF15,CCN2,IL1RN,MAP2K5,IL6,IL6R,GADD45A,DDT,JAK2,DUSP15,ELANE,PLCE1
GO: Biological Process	GO:0086003	cardiac muscle cell contraction		5.805e-05	0.3979	0.008467	0.07967	12	80	SCN1A,SCN2B,FGF12,SGCD,ATP2A2,STRIT1,GPD1L,PDE4B,PDE4D,KCNJ8,KCNN2,HCN4
GO: Biological Process	GO:0030239	myofibril assembly		5.805e-05	0.3979	0.008467	0.07967	12	80	ACTA1,SYNPO2L,ACTN2,LMOD2,MYH6,MYL2,CAPN3,TNNT1,PDGFRA,MYOZ1,MYLK3,KRT19
GO: Biological Process	GO:0019220	regulation of phosphate metabolic process		6.283e-05	0.4307	0.008972	0.08443	111	1994	ERBB3,EREG,CD109,RRAS,F2R,ADCY1,ADCYAP1R1,SAA1,FCER1A,CCL2,FGF7,FGF10,C1QTNF3,CCL11,FGFR4,GPNMB,VEGFD,IL31RA,SFRP4,SHB,CAMSAP3,UQCC2,INPP5F,APOE,ALKAL2,SNCA,SH3RF3,MARCO,PHACTR1,DOK5,GADD45B,STK26,CCND1,BCL2,MSTN,BLM,GPD1L,SOCS2,BMP5,BMP7,GADD45G,NGFR,C3,GNB3,WWC1,GPD1,DOK7,SOCS3,GRIK2,GPRC5A,GRM1,TGFA,TGFB2,TGFB3,LEFTY2,HAVCR2,PKIG,TGFBR3,THBS4,THY1,ISCU,COX7A2L,NUP188,EDA2R,TPD52L1,PDE4D,PDGFRA…
GO: Biological Process	GO:0051174	regulation of phosphorus metabolic process		6.413e-05	0.4396	0.008972	0.08443	111	1995	ERBB3,EREG,CD109,RRAS,F2R,ADCY1,ADCYAP1R1,SAA1,FCER1A,CCL2,FGF7,FGF10,C1QTNF3,CCL11,FGFR4,GPNMB,VEGFD,IL31RA,SFRP4,SHB,CAMSAP3,UQCC2,INPP5F,APOE,ALKAL2,SNCA,SH3RF3,MARCO,PHACTR1,DOK5,GADD45B,STK26,CCND1,BCL2,MSTN,BLM,GPD1L,SOCS2,BMP5,BMP7,GADD45G,NGFR,C3,GNB3,WWC1,GPD1,DOK7,SOCS3,GRIK2,GPRC5A,GRM1,TGFA,TGFB2,TGFB3,LEFTY2,HAVCR2,PKIG,TGFBR3,THBS4,THY1,ISCU,COX7A2L,NUP188,EDA2R,TPD52L1,PDE4D,PDGFRA…
GO: Biological Process	GO:0006941	striated muscle contraction		6.646e-05	0.4556	0.009112	0.08574	20	193	SCN1A,SCN2B,FGF12,SGCD,ATP2A2,MYH6,MYL2,C12orf57,STRIT1,GPD1L,NPPA,TNNI3,TNNT1,PDE4B,PDE4D,CCN2,KCNJ8,KCNN2,HCN4,ACE2
GO: Biological Process	GO:0055080	cation homeostasis		7.124e-05	0.4883	0.009575	0.09011	55	825	F2R,F2RL2,ADCYAP1R1,SAA1,SLC24A4,CXCL9,CCL2,CCL11,RHCG,SGCD,APOE,RAB20,DHRS7C,MTLN,CORIN,SNCA,ATP1A4,ATP2A2,UNC80,ATP6V1G2,SLC46A1,BCL2,SLC9A7,C7,CAPN3,GRIK2,GRIN2A,GRM1,TFRC,TGFB2,THY1,P2RX1,P2RY2,ISCU,TNNI3,SNAPIN,PDE4D,PDGFRA,PDK4,SLC26A4,TRPC4,CA14,HMOX1,HMOX2,HJV,STEAP2,SLC30A2,JAK2,KCNK3,STEAP4,S1PR3,RHAG,ELANE,STEAP3,PLCE1
GO: Biological Process	GO:0008610	lipid biosynthetic process		7.447e-05	0.5105	0.009818	0.09238	51	748	SPTLC3,ACACB,B3GNT5,ACOT4,FASN,MGST1,SLC44A5,PLIN5,FGF7,FGFR4,ALDH3B1,PLEKHA4,APOB,INPP5F,APOE,B3GALT2,B4GALNT1,LPCAT4,GPD1L,SOCS2,BMP5,C3,GPD1,SOCS3,CRPPA,P2RX1,TM7SF2,SERINC5,CDS1,PDK4,PEX7,HMGCS2,FADS2,PLA2G2A,PLP1,SGPP2,ETNPPL,OSBPL3,PRLR,CYP11A1,PTDSS1,IDI2,PTGS1,PTGS2,CERS4,HSD17B8,ORMDL3,LPCAT3,ST8SIA2,HSD17B14,PLCE1
GO: Biological Process	GO:0006812	cation transport		7.898e-05	0.5414	0.01022	0.09613	84	1423	ACTN2,KCNIP2,F2R,ADCYAP1R1,FCER1A,SLC24A4,SCN1A,SCN2B,CXCL9,CCL2,FGF12,LRRC7,SYT13,RHCG,UQCC2,SLC5A1,ARHGAP1,SLC15A2,DHRS7C,UQCRQ,SNCA,ATP1A4,ATP2A2,UNC80,SLC25A45,ATP5ME,ATP6V1G2,SLC46A1,BCL2,STRIT1,GPD1L,ABCC8,GLRX,SLC9A7,KCNMB4,SLC38A3,NPPA,CAMK2B,CAPN3,GRIA3,GRIK2,GRIK3,GRIN2A,TFRC,TGFB2,ATP1B4,THY1,P2RX1,P2RX6,ISCU,COX7A2L,TNNI3,PDE4B,PDE4D,TRPC4,SERPINE2,NALCN,FXYD3,HSPA2,COX7A2,COX7B,NDUFA…
GO: Biological Process	GO:0072359	circulatory system development		8.985e-05	0.6159	0.01141	0.1073	79	1323	ERBB3,EREG,ACACB,SYNPO2L,MCAM,ACTN2,RRAS,MDK,CCL2,FGF10,FGF12,CCL11,GPNMB,FHL2,VEGFD,FOXS1,SORBS2,PI16,SGCD,SGCG,SHB,APOB,APOE,B9D1,SMARCD3,MYH6,ADAM19,MYL2,NACA,BBS4,NDP,SMOC2,DNAAF3,BMP5,BMP7,ABCC8,NGFR,C3,C6,NPPA,SOCS3,ESM1,SH2D2A,TGFA,TGFB2,TGFB3,TGFBR3,BORCS8,THBS4,THY1,HEY2,TNNI3,PCNT,DDAH1,DHRS3,PDGFRA,ENPP2,HMOX1,GATA5,HSPB6,CCN2,MAP2K5,IL6,IL6R,ARHGAP24,PTGS2,ITGB8,MYLK3,KCNJ8,TMEM231,TB…
GO: Biological Process	GO:0010862	positive regulation of pathway-restricted SMAD protein phosphorylation		9.822e-05	0.6733	0.01218	0.1147	9	49	MSTN,BMP5,BMP7,TGFB2,TGFB3,LEFTY2,GDF6,BMP8A,GDF15
GO: Biological Process	GO:0001932	regulation of protein phosphorylation		9.953e-05	0.6823	0.01218	0.1147	93	1625	ERBB3,EREG,CD109,RRAS,F2R,ADCY1,SAA1,FCER1A,CCL2,FGF7,FGF10,C1QTNF3,CCL11,FGFR4,GPNMB,VEGFD,IL31RA,SFRP4,SHB,INPP5F,APOE,ALKAL2,SNCA,SH3RF3,MARCO,DOK5,GADD45B,STK26,CCND1,BCL2,MSTN,BLM,GPD1L,BMP5,BMP7,GADD45G,NGFR,C3,WWC1,DOK7,SOCS3,GRIK2,GPRC5A,GRM1,TGFA,TGFB2,TGFB3,LEFTY2,HAVCR2,PKIG,TGFBR3,THBS4,THY1,EDA2R,TPD52L1,PDE4D,PDGFRA,ENPP2,GDF6,PPP1R15A,TNFRSF4,DUSP26,UBB,CLU,UCHL1,PLA2G2A,BMP8A,HSPA…
GO: Biological Process	GO:0048878	chemical homeostasis		0.0001175	0.8051	0.01413	0.1329	79	1334	F2R,F2RL2,ADCY1,ADCYAP1R1,SAA1,SLC24A4,SCN2B,CXCL9,CCL2,FGF7,FGF12,C1QTNF3,CCL11,FGFR4,RHCG,SFRP4,SGCD,APOB,APOE,RAB20,AQP4,AQP9,DHRS7C,MTLN,CORIN,SNCA,ATP1A4,ATP2A2,IFI6,UNC80,ATP6V1G2,SLC46A1,BCL2,SSTR5,GPD1L,ABCC8,NGFR,SLC9A7,MLLT11,C7,GPR27,CAPN3,GRIK2,GRIN2A,GRM1,TFRC,TGFB2,THY1,P2RX1,P2RY2,ISCU,TNNI3,SNAPIN,PDE4D,HK3,PDGFRA,PDK4,SLC26A4,TRPC4,CA14,HMOX1,HMOX2,HJV,IL6,STEAP2,SLC30A2,AKR1C1,J…
GO: Biological Process	GO:0031401	positive regulation of protein modification process		0.0001254	0.8597	0.01482	0.1395	81	1379	ERBB3,EREG,TBC1D7,F2R,ADCY1,SAA1,FCER1A,CCL2,FGF7,FGF10,C1QTNF3,CCL11,FGFR4,ARRDC3,GPNMB,VEGFD,IL31RA,BIRC3,APOE,ALKAL2,ARNTL,SNCA,SH3RF3,MARCO,DOK5,GADD45B,STK26,CCND1,BCL2,MSTN,ARID5A,BMP5,BMP7,GADD45G,NGFR,C3,WWC1,DOK7,SOCS3,GPRC5A,GRM1,TGFA,TGFB2,TGFB3,LEFTY2,HAVCR2,THBS4,EDA2R,TPD52L1,PDGFRA,ENPP2,GDF6,PPP1R15A,DUSP26,UBB,CLU,PLA2G2A,BMP8A,HSPA2,MDFIC,MAP3K8,GDF15,CLIP3,LRRN3,CTF1,CCN2,IL1RN…
GO: Biological Process	GO:0090257	regulation of muscle system process		0.0001444	0.9898	0.01678	0.1579	26	303	F2R,GTF2IRD2,PI16,ATP2A2,MYL2,MYL5,C12orf57,MSTN,STRIT1,ABCC8,NPPA,CAMK2B,P2RX1,TNNI3,TNNT1,PDE4B,PDE4D,GATA5,HSPB6,CCN2,PTGS1,PTGS2,HCN4,NR4A3,ACE2,PLCE1
GO: Biological Process	GO:0043269	regulation of ion transport		0.0001638	1	0.01871	0.1761	53	812	ACTN2,KCNIP2,F2R,ADCYAP1R1,SCN1A,SCN2B,CXCL9,CCL2,FGF12,LRRC7,FGFR4,SYT13,SFRP4,APOE,DHRS7C,SNCA,GABRE,BCL2,STRIT1,GPD1L,PER2,ABCC8,GLRX,SLC38A3,NPPA,CAMK2B,CAPN3,GRIA3,CLIC6,GRIN2A,TGFB2,THY1,P2RX1,P2RY2,ISCU,PDE4B,PDE4D,TRPC4,ABCB1,SERPINE2,NALCN,FXYD3,HSPA2,IL1RN,RELN,PTGS2,KCNC4,KCNJ4,KCNJ8,KCNMB1,KCNN2,HCN4,ACE2
GO: Biological Process	GO:0015669	gas transport		0.0001935	1	0.02143	0.2016	6	23	AQP4,HBA1,HBA2,HBB,CA14,RHAG
GO: Biological Process	GO:0006937	regulation of muscle contraction		0.0001969	1	0.02143	0.2016	19	193	F2R,ATP2A2,MYL2,MYL5,C12orf57,STRIT1,NPPA,P2RX1,TNNI3,TNNT1,PDE4B,PDE4D,HSPB6,CCN2,PTGS1,PTGS2,HCN4,ACE2,PLCE1
GO: Biological Process	GO:0007610	behavior		0.0001995	1	0.02143	0.2016	49	739	MDK,ADCY1,SCN1A,FGF12,CCL11,ARRDC3,AMPH,INPP5F,APOE,ASIP,DMRTA1,SNCA,BRSK1,CHL1,GATM,BBS4,BCL2,C12orf57,PER3,ABCC8,GNB3,SDK1,ADGRL3,CUX2,NPTX2,GRID1,GRIK2,GRIN2A,GRM1,THBS4,SEZ6L,CIART,PENK,SERPINE2,UCHL1,GDF15,CPT1A,IL1RN,IL6,RELN,CYP11A1,BRINP1,PTGS1,PTGS2,LYPD1,PCDH15,NR4A3,ACE2,LSAMP
GO: Biological Process	GO:0030001	metal ion transport		0.0002018	1	0.02143	0.2016	63	1022	ACTN2,KCNIP2,F2R,ADCYAP1R1,SLC24A4,SCN1A,SCN2B,CXCL9,CCL2,FGF12,SLC5A1,ARHGAP1,DHRS7C,SNCA,ATP1A4,ATP2A2,ATP6V1G2,SLC46A1,BCL2,STRIT1,GPD1L,ABCC8,GLRX,SLC9A7,KCNMB4,SLC38A3,NPPA,CAMK2B,CAPN3,GRIK2,GRIK3,GRIN2A,TFRC,TGFB2,ATP1B4,THY1,P2RX1,ISCU,TNNI3,PDE4B,PDE4D,TRPC4,SERPINE2,NALCN,FXYD3,HSPA2,CCN2,STEAP2,SLC30A2,PTGS2,KCNC4,KCNJ4,KCNJ8,NECTIN1,KCNK3,KCNMB1,KCNN2,TMEM163,GRIN3A,HCN4,STEAP4,STEAP3…
GO: Biological Process	GO:0007267	cell-cell signaling		0.0002032	1	0.02143	0.2016	104	1899	EREG,MBP,MDK,KCNIP2,F2R,ADCY1,SCN1A,SCN2B,CXCL9,CCL2,FGF7,FGF10,FGF12,C1QTNF3,FGFR4,GPNMB,AMPH,SORBS2,SFRP4,SLC25A5,SCG5,PPFIA4,PLEKHA4,UQCC2,APOE,ARNTL,ASIP,CSPG5,FRZB,NSG1,DACT3,SNCA,BRSK1,MCTP2,ATP2A2,SLC16A10,GABRB3,GABRE,MYH6,CPLX1,CCND1,NDP,SSTR5,PER2,ABCC8,GLRX,NGFR,C3,KCNMB4,NPPA,CUX2,NPTX2,GPR27,CAMK2B,GRK5,GRIA3,GRID1,SHISA2,GRIK2,GRIK3,GRIN2A,GRM1,CBLN1,THY1,P2RX1,P2RY2,P2RX6,SNAPIN,PD…
GO: Biological Process	GO:0008016	regulation of heart contraction		0.0002219	1	0.02291	0.2156	24	277	KCNIP2,SCN2B,CORIN,ATP1A4,ATP2A2,MYH6,MYL2,STRIT1,GPD1L,NPPA,TGFB2,HEY2,TNNI3,PDE4B,PDE4D,FXYD3,CCN2,CYP2J2,JAK2,KCNJ4,KCNK3,KCNN2,HCN4,ACE2
GO: Biological Process	GO:0048666	neuron development		0.000225	1	0.02291	0.2156	76	1298	MAP2,MAP4,CDHR1,ETV4,EXT1,ATAT1,MDK,KCNIP2,ADCY1,S100A6,LRRC7,CAMSAP3,INPP5F,APOE,ALKAL2,CPNE5,ZNF365,EFHC2,EFHD1,UQCRQ,BRSK1,PHACTR1,CHL1,GABRB3,DOK5,SPOCK1,SRRM4,STK26,BBS4,BCL2,C12orf57,BMP5,BMP7,NGFR,C3,DCLK2,SDK1,DDR1,CUX2,NPTX2,CAMK2B,GRB7,CRPPA,TGFB2,THBS4,THY1,P2RY2,MTURN,ARHGAP33,SNAPIN,UBB,SERPINE2,SEMA5B,CLU,UCHL1,CTHRC1,PLP1,SH3KBP1,RTN4RL1,VSTM2L,CTF1,IL6,RELN,RIPOR2,GAB2,ITPKA,JAK2,…
GO: Biological Process	GO:0098706	iron ion import across cell outer membrane		0.0002273	1	0.02291	0.2156	3	4	STEAP2,STEAP4,STEAP3
GO: Biological Process	GO:0022610	biological adhesion		0.0002469	1	0.02426	0.2283	86	1516	ERBB3,CDHR1,MBP,CNTNAP3,MCAM,ACTN2,MDK,MFAP4,SAA1,CCL2,LRRC7,CCL11,GPNMB,SELE,SHB,CAMSAP3,ITGA10,AQP4,MYL12A,RND3,STXBP6,CSPG5,ATP2A2,CHL1,CADM3,ADAM19,SPOCK1,SIGLEC9,AZGP1,UNC13D,BCL2,SMOC2,BLM,BMP5,LYVE1,BMP7,SDK1,ADGRL3,DDR1,PCDHGA6,OMD,CBLN1,TFRC,TGFB2,HAVCR2,THBS4,THY1,CNTN3,HBB,PDGFRA,ENPP2,VSIG4,VIT,HEPACAM,DUSP26,ITGBL1,SERPINE2,COL16A1,MAP3K8,XG,GATA5,PCDH20,VSTM2L,CCN2,IL1RN,MAP2K5,IL6,…
GO: Biological Process	GO:0060389	pathway-restricted SMAD protein phosphorylation		0.0002477	1	0.02426	0.2283	10	67	MSTN,BMP5,BMP7,TGFB2,TGFB3,LEFTY2,TGFBR3,GDF6,BMP8A,GDF15
GO: Biological Process	GO:0061448	connective tissue development		0.000254	1	0.02452	0.2308	26	314	MDK,ARRDC3,SCUBE2,FRZB,BBS4,ARID5A,BGN,BMP5,BMP7,CHADL,RUNX2,TGFB2,ADAMTS7,DYRK1B,GDF6,CYTL1,VIT,UBB,BMP8A,COL9A1,CHRDL2,CCN2,IL6R,ITGB8,LINC-PINT,LUM
GO: Biological Process	GO:0060078	regulation of postsynaptic membrane potential		0.0002633	1	0.02507	0.2359	17	166	SNCA,GABRB3,GABRE,NGFR,CUX2,GRIA3,GRID1,GRIK2,GRIK3,GRIN2A,GRM1,CBLN1,P2RX1,P2RX6,RELN,KCNC4,GRIN3A
GO: Biological Process	GO:0043524	negative regulation of neuron apoptotic process		0.0002713	1	0.02548	0.2397	18	182	ERBB3,MDK,F2R,CCL2,APOE,SNCA,FAIM2,CHL1,GABRB3,NES,BCL2,NGFR,GRIK2,TGFB3,HMOX1,VSTM2L,JAK2,NR4A3
GO: Biological Process	GO:0007178	transmembrane receptor protein serine/threonine kinase signaling pathway		0.0002786	1	0.0256	0.2409	30	387	CD109,CCL2,FGF10,NCEH1,SFRP4,FMOD,RASL11B,MYH6,MSTN,BMP5,BMP7,RUNX2,TGFB2,TGFB3,LEFTY2,TGFBR3,GDF6,UBB,BMP8A,HJV,CHRDL2,GDF15,IGSF1,HTRA1,ASPN,TBX20,DUSP15,LTBP1,LTBP2,LEF1
GO: Biological Process	GO:0043501	skeletal muscle adaptation		0.0002801	1	0.0256	0.2409	7	34	ACTA1,GTF2IRD2,ATP2A2,MSTN,CAMK2B,TNNT1,MYOZ1
GO: Biological Process	GO:0007141	male meiosis I		0.0003176	1	0.02828	0.2661	6	25	MYBL1,DMC1,TRIP13,UBB,HSPA2,TDRD9
GO: Biological Process	GO:0002693	positive regulation of cellular extravasation		0.0003176	1	0.02828	0.2661	6	25	MDK,CCL2,THY1,XG,RIPOR2,ELANE
GO: Biological Process	GO:0007155	cell adhesion		0.0003367	1	0.02959	0.2785	85	1509	ERBB3,CDHR1,MBP,CNTNAP3,MCAM,ACTN2,MDK,MFAP4,SAA1,CCL2,LRRC7,CCL11,GPNMB,SELE,SHB,CAMSAP3,ITGA10,AQP4,MYL12A,RND3,STXBP6,CSPG5,ATP2A2,CHL1,CADM3,ADAM19,SPOCK1,SIGLEC9,AZGP1,UNC13D,BCL2,SMOC2,BLM,BMP5,LYVE1,BMP7,SDK1,ADGRL3,DDR1,PCDHGA6,OMD,CBLN1,TFRC,TGFB2,HAVCR2,THBS4,THY1,CNTN3,HBB,PDGFRA,ENPP2,VSIG4,VIT,HEPACAM,DUSP26,ITGBL1,SERPINE2,COL16A1,MAP3K8,XG,GATA5,PCDH20,VSTM2L,CCN2,IL1RN,MAP2K5,IL6,…
GO: Biological Process	GO:0032989	cellular component morphogenesis		0.0003582	1	0.03108	0.2925	75	1297	MAP2,CDHR1,ACTA1,SYNPO2L,ETV4,EXT1,ACTN2,MDK,ADCY1,S100A6,S100A13,MFAP2,CCL2,CCL11,APOE,CPNE5,LMOD2,ZNF365,RND3,CSPG5,BRSK1,PHACTR1,CHL1,DOK5,NES,MYH6,MYL2,STK26,UNC13D,BCL2,C12orf57,BMP7,NGFR,DDR1,CUX2,CAMK2B,CAPN3,GRB7,CRPPA,TGFB2,THBS4,THY1,SH3D19,MAEL,TNNT1,ARHGAP33,PDGFRA,ENPP2,VIT,UBB,MYOZ1,SEMA5B,CLU,UCHL1,SH3KBP1,RTN4RL1,SYNE3,WTIP,VSTM2L,IL6,RELN,RIPOR2,GAB2,ITPKA,MYLK3,RHOBTB1,NECTIN1,P…
GO: Biological Process	GO:0019755	one-carbon compound transport		0.0003668	1	0.03135	0.295	5	17	AQP4,AQP9,CA14,AQP10,RHAG
GO: Biological Process	GO:0006629	lipid metabolic process		0.0003762	1	0.03135	0.295	83	1471	SPTLC3,ACACB,B3GNT5,ACOT4,FAAH,ADH1B,FASN,MGST1,SLC44A5,MGST3,PLA1A,PLIN5,FGF7,NCEH1,FGFR4,ALDH3B1,FHL2,SLC27A6,PLEKHA4,APOB,INPP5F,APOE,SMARCD3,ST6GALNAC4,SNCA,B3GALT2,B4GALNT1,LPCAT4,BBS4,GPD1L,SOCS2,BMP5,PER2,SULT1A1,C3,GNB3,GPD1,SOCS3,CRPPA,P2RX1,TM7SF2,SERINC5,CDS1,DHRS3,PDGFRA,PDK4,ENPP2,PEX7,HMGCL,HMGCS2,PIK3IP1,TYRP1,CLU,FADS2,PLA2G2A,PLP1,G0S2,SGPP2,ETNPPL,CPT1A,OSBPL3,IL1RN,PRLR,CYP2J2,…
GO: Biological Process	GO:0034762	regulation of transmembrane transport		0.0003794	1	0.03135	0.295	43	641	ERBB3,ACTN2,KCNIP2,F2R,SCN1A,SCN2B,CXCL9,CCL2,FGF12,LRRC7,AZIN1,DHRS7C,SNCA,BCL2,STRIT1,GPD1L,PER2,ABCC8,GLRX,C3,NPPA,CAPN3,GRIA3,CLIC6,GRIN2A,TGFB2,THY1,ISCU,PDE4B,PDE4D,ABCB1,NALCN,FXYD3,HSPA2,CLIP3,RELN,KCNC4,KCNJ4,KCNJ8,KCNMB1,KCNN2,HCN4,NR4A3
GO: Biological Process	GO:0017144	drug metabolic process		0.0003796	1	0.03135	0.295	49	760	ADH1B,ALDH3B1,CARNS1,AMD1,AOX1,UQCC2,CSPG5,NT5C2,UQCRQ,SNCA,ATP5ME,GATM,SLC46A1,GCHFR,GNMT,ADA2,BGN,BMP5,SULT1A1,SLC19A3,GRIN2A,TGFB2,ISCU,HAAO,COX7A2L,HBA1,HBA2,HBB,PCBD1,SDSL,DDAH2,DDAH1,HMGCL,HMGCS2,TYRP1,CLU,FADS2,COX7A2,COX7B,NDUFA11,IL6,CYP2J2,CYP11A1,AKR1C1,PTGS2,JAK2,RENBP,APIP,AASS
GO: Biological Process	GO:0009967	positive regulation of signal transduction		0.0003926	1	0.03203	0.3014	99	1823	ERBB3,EREG,SYNPO2L,F2R,F2RL2,ADCYAP1R1,S100A13,SAA1,FCER1A,CCL2,FGF7,FGF10,C1QTNF3,CCL11,FGFR4,GPNMB,IL31RA,SFRP4,SHB,PLEKHA4,BIRC3,APOE,ALKAL2,ARHGAP1,ARNTL,SCUBE2,SH3RF3,MARCO,DOK5,GADD45B,IL20RA,BCL2,SMOC2,MSTN,SOCS2,BMP5,BMP7,GADD45G,GLRX,NGFR,C3,MLLT11,WWC1,NPPA,CUX2,GPR27,CAMK2B,SOCS3,GRB7,GRB14,ESM1,SH2D2A,GRIN2A,GRM1,TGFA,TGFB2,TGFB3,LEFTY2,HAVCR2,TGFBR3,DISP1,EDA2R,TPD52L1,PDGFRA,GDF6,HM…
GO: Biological Process	GO:0048753	pigment granule organization		0.0003995	1	0.03221	0.3031	6	26	ASIP,KIF13A,BCL2,SNAPIN,TYRP1,TRAPPC6A
GO: Biological Process	GO:0072132	mesenchyme morphogenesis		0.0004249	1	0.03359	0.3161	9	59	ACTA1,BMP5,BMP7,TGFB2,TGFB3,HEY2,GATA5,TBX20,LEF1
GO: Biological Process	GO:1901615	organic hydroxy compound metabolic process		0.0004263	1	0.03359	0.3161	40	586	ACACB,ADCYAP1R1,ADH1B,FASN,FGFR4,ALDH3B1,APOB,APOE,ASIP,SNCA,SLC16A10,BCL2,BMP5,PER2,SULT1A1,GNB3,GPD1,GRIN2A,TGFB2,NUDT4,TM7SF2,PCBD1,DHRS3,HMGCS2,TYRP1,SGPP2,CRYM,OSBPL3,RELN,CYP11A1,SLCO4A1,IDI2,RETSAT,AKR1C1,DDT,ITPKA,DIO2,PLD4,LDHA,PLCE1
GO: Biological Process	GO:0043062	extracellular structure organization		0.0004568	1	0.03558	0.3348	36	511	MFAP2,MFAP4,AEBP1,NCEH1,FGFR4,FMOD,ITGA10,APOB,APOE,FSCN1,ADAM19,SMOC2,BGN,BMP7,ABCC8,DDR1,CHADL,ADAMTS5,TGFB2,PDGFRA,COL22A1,HMOX1,VIT,PLA2G2A,COL9A1,COL16A1,ADAMTS4,CCN2,CTSG,IL6,HTRA1,ITGAE,ITGB8,ELANE,ELF3,LUM
GO: Biological Process	GO:0098662	inorganic cation transmembrane transport		0.000476	1	0.03609	0.3396	60	993	ACTN2,KCNIP2,F2R,SLC24A4,SCN1A,SCN2B,CXCL9,FGF12,UQCC2,SLC5A1,SLC15A2,DHRS7C,UQCRQ,SNCA,ATP1A4,ATP2A2,ATP5ME,ATP6V1G2,SLC46A1,STRIT1,GPD1L,ABCC8,GLRX,SLC9A7,KCNMB4,NPPA,CAPN3,GRIK2,GRIK3,GRIN2A,TFRC,TGFB2,THY1,ISCU,COX7A2L,TNNI3,PDE4B,PDE4D,TRPC4,NALCN,FXYD3,HSPA2,COX7A2,COX7B,NDUFA11,STEAP2,SLC30A2,KCNC4,KCNJ4,KCNJ8,KCNK3,KCNMB1,KCNN2,TMEM163,GRIN3A,TMCO3,HCN4,STEAP4,STEAP3,PLCE1
GO: Biological Process	GO:0043500	muscle adaptation		0.0004805	1	0.03609	0.3396	16	159	ACTA1,GTF2IRD2,PI16,INPP5F,ATP2A2,MYH6,GATM,MSTN,NPPA,CAMK2B,HEY2,TNNT1,HMOX1,MYOZ1,GATA5,NR4A3
GO: Biological Process	GO:0045214	sarcomere organization		0.0004829	1	0.03609	0.3396	9	60	SYNPO2L,ACTN2,LMOD2,MYH6,CAPN3,TNNT1,MYOZ1,MYLK3,KRT19
GO: Biological Process	GO:0061384	heart trabecula morphogenesis		0.0004843	1	0.03609	0.3396	7	37	FHL2,NACA,BMP5,BMP7,TGFB2,TGFBR3,HEY2
GO: Biological Process	GO:0035637	multicellular organismal signaling		0.0004914	1	0.03622	0.3408	20	224	KCNIP2,SCN1A,SCN2B,FGF12,CORIN,ATP1A4,ATP2A2,KCNMB4,NPPA,GRIK2,P2RX1,PDE4D,FXYD3,IL6,KCNC4,KCNJ4,KCNK3,KCNN2,HCN4,ACE2
GO: Biological Process	GO:0099536	synaptic signaling		0.0005114	1	0.03729	0.3509	56	913	MBP,KCNIP2,F2R,ADCY1,SCN1A,SCN2B,CCL2,FGF12,AMPH,SORBS2,PPFIA4,APOE,CSPG5,NSG1,SNCA,BRSK1,MCTP2,ATP2A2,GABRB3,GABRE,CPLX1,NGFR,KCNMB4,CUX2,NPTX2,CAMK2B,GRIA3,GRID1,GRIK2,GRIK3,GRIN2A,GRM1,CBLN1,P2RX1,P2RY2,P2RX6,SNAPIN,PDE4A,PENK,SERPINE2,PLP1,RAB26,GABBR2,CADPS2,IL6,RELN,PTGS2,ITPKA,JAK2,LYPD1,KCNC4,KCNK3,KCNMB1,KCNN2,GRIN3A,FARP1
GO: Biological Process	GO:0042476	odontogenesis		0.0005332	1	0.03848	0.3621	15	145	SLC24A4,FGF10,BMP7,NGFR,TSPEAR,ADAMTS5,RUNX2,TGFB2,TGFB3,PDGFRA,HTRA1,ASPN,NECTIN1,EDA,LEF1
GO: Biological Process	GO:0070318	positive regulation of G0 to G1 transition		0.0005515	1	0.03938	0.3706	3	5	SOX15,CCN2,RHNO1
GO: Biological Process	GO:0003203	endocardial cushion morphogenesis		0.000574	1	0.04029	0.3791	7	38	BMP5,BMP7,TGFB2,TGFB3,HEY2,GATA5,TBX20
GO: Biological Process	GO:0018958	phenol-containing compound metabolic process		0.000576	1	0.04029	0.3791	13	116	ASIP,SNCA,SLC16A10,BCL2,SULT1A1,GRIN2A,TGFB2,TYRP1,CRYM,RELN,SLCO4A1,DDT,DIO2
GO: Biological Process	GO:0099505	regulation of presynaptic membrane potential		0.0006004	1	0.04063	0.3824	4	11	GRIK2,GRIK3,GRIN2A,KCNC4
GO: Biological Process	GO:0003272	endocardial cushion formation		0.0006117	1	0.04063	0.3824	6	28	BMP5,BMP7,TGFB2,TGFB3,HEY2,TBX20
GO: Biological Process	GO:0021695	cerebellar cortex development		0.0006185	1	0.04063	0.3824	9	62	MDK,ZNF365,UQCRQ,FAIM2,CBLN1,SEZ6L,PCNT,SERPINE2,TRNP1
GO: Biological Process	GO:0034765	regulation of ion transmembrane transport		0.0006226	1	0.04063	0.3824	37	539	ACTN2,KCNIP2,F2R,SCN1A,SCN2B,CXCL9,CCL2,FGF12,LRRC7,DHRS7C,SNCA,STRIT1,GPD1L,PER2,ABCC8,GLRX,NPPA,CAPN3,GRIA3,CLIC6,GRIN2A,TGFB2,THY1,ISCU,PDE4B,PDE4D,ABCB1,NALCN,FXYD3,HSPA2,RELN,KCNC4,KCNJ4,KCNJ8,KCNMB1,KCNN2,HCN4
GO: Biological Process	GO:0099537	trans-synaptic signaling		0.0006243	1	0.04063	0.3824	55	900	MBP,KCNIP2,F2R,ADCY1,SCN1A,SCN2B,CCL2,FGF12,AMPH,PPFIA4,APOE,CSPG5,NSG1,SNCA,BRSK1,MCTP2,ATP2A2,GABRB3,GABRE,CPLX1,NGFR,KCNMB4,CUX2,NPTX2,CAMK2B,GRIA3,GRID1,GRIK2,GRIK3,GRIN2A,GRM1,CBLN1,P2RX1,P2RY2,P2RX6,SNAPIN,PDE4A,PENK,SERPINE2,PLP1,RAB26,GABBR2,CADPS2,IL6,RELN,PTGS2,ITPKA,JAK2,LYPD1,KCNC4,KCNK3,KCNMB1,KCNN2,GRIN3A,FARP1
GO: Biological Process	GO:0098660	inorganic ion transmembrane transport		0.0006269	1	0.04063	0.3824	64	1088	ACTN2,KCNIP2,F2R,SLC24A4,SCN1A,SCN2B,CXCL9,FGF12,UQCC2,SLC5A1,SLC15A2,DHRS7C,UQCRQ,SNCA,ATP1A4,ATP2A2,GABRB3,GABRE,ATP5ME,ATP6V1G2,SLC46A1,STRIT1,GPD1L,ABCC8,GLRX,SLC9A7,KCNMB4,NPPA,CAPN3,GRIK2,GRIK3,CLIC6,GRIN2A,TFRC,TGFB2,THY1,ISCU,COX7A2L,TNNI3,PDE4B,PDE4D,SLC26A4,TRPC4,NALCN,FXYD3,HSPA2,COX7A2,COX7B,NDUFA11,STEAP2,SLC30A2,KCNC4,KCNJ4,KCNJ8,KCNK3,KCNMB1,KCNN2,TMEM163,GRIN3A,TMCO3,HCN4,STEAP4,S…
GO: Biological Process	GO:0006935	chemotaxis		0.0006316	1	0.04063	0.3824	45	697	ETV4,EXT1,MDK,SAA1,CXCL9,CCL2,FGF7,FGF10,CCL11,GPNMB,VEGFD,CHL1,DOK5,SMOC2,MSTN,BMP7,NGFR,GRB7,CRPPA,CXCL1,TGFB2,THBS4,PDE4B,PDE4D,PDGFRA,ENPP2,HMGB2,SEMA5B,SH3KBP1,RTN4RL1,VSTM2L,IL1RN,IL6,IL6R,RELN,RIPOR2,DDT,GAB2,NECTIN1,RAP1GAP,NR4A3,RNASE2,ELANE,LSP1,LEF1
GO: Biological Process	GO:0001503	ossification		0.000633	1	0.04063	0.3824	32	444	EXT1,MDK,FASN,GPNMB,FHL2,SCUBE2,DLK1,BCL2,BMP5,BMP7,RUNX2,OMD,TGFB2,TGFB3,TGFBR3,P2RY2,DHRS3,PENK,PEX7,CTHRC1,BMP8A,NOCT,CHRDL2,ISG15,CCN2,IL6,IL6R,ASPN,PTGS2,UCMA,RORB,LEF1
GO: Biological Process	GO:0090092	regulation of transmembrane receptor protein serine/threonine kinase signaling pathway		0.0006429	1	0.04063	0.3824	22	263	CD109,FGF10,SFRP4,RASL11B,MSTN,BMP5,BMP7,TGFB2,TGFB3,LEFTY2,TGFBR3,GDF6,UBB,BMP8A,HJV,CHRDL2,GDF15,IGSF1,HTRA1,ASPN,TBX20,LTBP1
GO: Biological Process	GO:0010035	response to inorganic substance		0.0006457	1	0.04063	0.3824	42	638	ACTA1,KCNIP2,ADCY1,S100A13,SYT13,FOSB,APOB,CPNE5,AQP9,SNCA,STK26,GATM,CCND1,BCL2,BLM,BMP7,FIBIN,ABCC8,GLRX,KCNMB4,CAMK2B,CAPN3,GRIN2A,TFRC,ZNF277,HAAO,HBA1,HBA2,HBB,HK3,PENK,HMOX1,IL6,CYP11A1,SLC30A2,PTGS2,KCNK3,PCDH15,KCNMB1,NR4A3,LDHA,CPNE4
GO: Biological Process	GO:0010715	regulation of extracellular matrix disassembly		0.0006461	1	0.04063	0.3824	5	19	FGFR4,FSCN1,DDR1,TGFB2,IL6
GO: Biological Process	GO:0042330	taxis		0.0006904	1	0.04302	0.4049	45	700	ETV4,EXT1,MDK,SAA1,CXCL9,CCL2,FGF7,FGF10,CCL11,GPNMB,VEGFD,CHL1,DOK5,SMOC2,MSTN,BMP7,NGFR,GRB7,CRPPA,CXCL1,TGFB2,THBS4,PDE4B,PDE4D,PDGFRA,ENPP2,HMGB2,SEMA5B,SH3KBP1,RTN4RL1,VSTM2L,IL1RN,IL6,IL6R,RELN,RIPOR2,DDT,GAB2,NECTIN1,RAP1GAP,NR4A3,RNASE2,ELANE,LSP1,LEF1
GO: Biological Process	GO:0043086	negative regulation of catalytic activity		0.0007047	1	0.04352	0.4095	58	967	ACACB,MAP2,CD109,ADCY1,PLIN5,PI16,SCG5,SHB,CAMSAP3,BIRC3,APOE,SNCA,IFI6,MARCO,PHACTR1,GADD45B,NES,SPOCK1,P2RY13,BBS4,GCHFR,SSTR5,MSTN,BMP7,GADD45G,NGFR,C3,NPR3,SOCS3,GRIK3,GPRC5A,TGFB2,PKIG,THY1,TNNI3,SERPINA5,PPP1R15A,PIK3IP1,DUSP26,SERPINE2,MYOZ1,UCHL1,TNFAIP8,GABBR2,PHACTR3,CST2,ITPRIP,MAP2K5,IL6,PTGS2,GADD45A,ATP5IF1,RARRES1,RENBP,S1PR3,FARP1,ANGPTL4,LEF1
GO: Biological Process	GO:0045823	positive regulation of heart contraction		0.0007272	1	0.04411	0.4151	8	51	ATP2A2,STRIT1,NPPA,TGFB2,HEY2,PDE4D,CCN2,ACE2
GO: Biological Process	GO:0003197	endocardial cushion development		0.0007272	1	0.04411	0.4151	8	51	ERBB3,BMP5,BMP7,TGFB2,TGFB3,HEY2,GATA5,TBX20
GO: Biological Process	GO:0044283	small molecule biosynthetic process		0.0007408	1	0.04451	0.4189	48	763	ACACB,ACOT4,ADCYAP1R1,FASN,FCER1A,MGST1,MGST3,C1QTNF3,FGFR4,CARNS1,AMD1,APOB,APOE,DNPH1,CSPG5,NT5C2,SNCA,GATM,GNMT,ADA2,BGN,BMP5,PER2,GPD1,NUDT4,TM7SF2,HAAO,SERINC5,PCBD1,PDE4A,PDE4B,PDE4D,PDK4,HMGCL,HMGCS2,FADS2,PLP1,OSBPL3,IL6,IDI2,PTGS1,PTGS2,ITPKA,HSD17B8,LDHA,APIP,AASS,PLCE1
GO: Biological Process	GO:0099565	chemical synaptic transmission, postsynaptic		0.0007468	1	0.04451	0.4189	18	198	SNCA,GABRB3,GABRE,NGFR,CUX2,NPTX2,GRIA3,GRID1,GRIK2,GRIK3,GRIN2A,GRM1,CBLN1,P2RX1,P2RX6,RELN,LYPD1,GRIN3A
GO: Biological Process	GO:0032496	response to lipopolysaccharide		0.0007684	1	0.04491	0.4226	27	356	F2R,MGST1,FCGR3A,CXCL9,CCL2,FGF10,SELE,APOB,SNCA,ATP2A2,ARID5A,TRIM41,CXCL1,HAVCR2,PDE4B,PDE4D,PENK,HMGB2,NOCT,IL1RN,CTSG,IL6,IL10RA,PTGS2,JAK2,KCNJ8,ELANE
GO: Biological Process	GO:0044092	negative regulation of molecular function		0.0007731	1	0.04491	0.4226	76	1354	ACACB,MAP2,CD109,ACTN2,ADCY1,CYS1,PLIN5,FGF12,FOXS1,SFRP4,PI16,SCG5,SHB,CAMSAP3,BIRC3,APOE,SNCA,IFI6,MARCO,PHACTR1,GADD45B,NES,SPOCK1,P2RY13,BBS4,GCHFR,SSTR5,MSTN,COMMD6,BMP7,GADD45G,PER2,NGFR,C3,NPR3,SOCS3,GRIK3,GPRC5A,TGFB2,HAVCR2,PKIG,THY1,HEY2,TNNI3,SERPINA5,HMOX1,PPP1R15A,TNFRSF4,PIK3IP1,DUSP26,SERPINE2,MYOZ1,UCHL1,TNFAIP8,GABBR2,PHACTR3,CST2,ITPRIP,IGSF1,IL1RN,MAP2K5,IL6,RIPOR2,PTGS2,GADD45…
GO: Biological Process	GO:0060393	regulation of pathway-restricted SMAD protein phosphorylation		0.0007837	1	0.04491	0.4226	9	64	MSTN,BMP5,BMP7,TGFB2,TGFB3,LEFTY2,GDF6,BMP8A,GDF15
GO: Biological Process	GO:1902533	positive regulation of intracellular signal transduction		0.0007879	1	0.04491	0.4226	65	1119	ERBB3,EREG,SYNPO2L,F2R,F2RL2,ADCYAP1R1,S100A13,SAA1,FCER1A,CCL2,FGF7,FGF10,C1QTNF3,CCL11,FGFR4,GPNMB,BIRC3,APOE,ALKAL2,SH3RF3,MARCO,DOK5,GADD45B,IL20RA,BCL2,GADD45G,GLRX,NGFR,C3,WWC1,NPPA,GRM1,TGFA,TGFB2,TGFB3,HAVCR2,EDA2R,TPD52L1,PDGFRA,GDF6,HMOX1,UBB,CLU,PLA2G2A,MDFIC,MAP3K8,GDF15,CHD5,CCN2,IL1RN,MAP2K5,IL6,IL6R,RELN,TRIM25,GADD45A,DDT,JAK2,C10orf71,RAD9A,DUSP15,EDA,ELANE,STEAP3,PLCE1
GO: Biological Process	GO:0007435	salivary gland morphogenesis		0.0007928	1	0.04491	0.4226	7	40	FGF7,FGF10,BMP7,TGFB2,TGFB3,IL6,EDA
GO: Biological Process	GO:0030049	muscle filament sliding		0.0007928	1	0.04491	0.4226	7	40	ACTA1,ACTN2,MYH6,MYL2,TNNI3,TNNT1,TPM3
GO: Biological Process	GO:0051216	cartilage development		0.0008079	1	0.04539	0.4272	20	233	MDK,SCUBE2,FRZB,ARID5A,BGN,BMP5,BMP7,CHADL,RUNX2,TGFB2,ADAMTS7,GDF6,CYTL1,VIT,BMP8A,COL9A1,CHRDL2,CCN2,ITGB8,LUM
GO: Biological Process	GO:0034764	positive regulation of transmembrane transport		0.0008427	1	0.04629	0.4356	21	251	ERBB3,ACTN2,KCNIP2,F2R,CXCL9,CCL2,AZIN1,SNCA,STRIT1,ABCC8,GLRX,C3,NPPA,CAPN3,THY1,ABCB1,HSPA2,CLIP3,RELN,KCNMB1,NR4A3
GO: Biological Process	GO:0007268	chemical synaptic transmission		0.0008441	1	0.04629	0.4356	54	891	MBP,KCNIP2,F2R,ADCY1,SCN1A,SCN2B,CCL2,FGF12,AMPH,PPFIA4,APOE,CSPG5,NSG1,SNCA,BRSK1,MCTP2,ATP2A2,GABRB3,GABRE,CPLX1,NGFR,KCNMB4,CUX2,NPTX2,CAMK2B,GRIA3,GRID1,GRIK2,GRIK3,GRIN2A,GRM1,CBLN1,P2RX1,P2RY2,P2RX6,SNAPIN,PDE4A,PENK,SERPINE2,PLP1,RAB26,GABBR2,CADPS2,IL6,RELN,PTGS2,ITPKA,JAK2,LYPD1,KCNC4,KCNK3,KCNMB1,KCNN2,GRIN3A
GO: Biological Process	GO:0098916	anterograde trans-synaptic signaling		0.0008441	1	0.04629	0.4356	54	891	MBP,KCNIP2,F2R,ADCY1,SCN1A,SCN2B,CCL2,FGF12,AMPH,PPFIA4,APOE,CSPG5,NSG1,SNCA,BRSK1,MCTP2,ATP2A2,GABRB3,GABRE,CPLX1,NGFR,KCNMB4,CUX2,NPTX2,CAMK2B,GRIA3,GRID1,GRIK2,GRIK3,GRIN2A,GRM1,CBLN1,P2RX1,P2RY2,P2RX6,SNAPIN,PDE4A,PENK,SERPINE2,PLP1,RAB26,GABBR2,CADPS2,IL6,RELN,PTGS2,ITPKA,JAK2,LYPD1,KCNC4,KCNK3,KCNMB1,KCNN2,GRIN3A
GO: Biological Process	GO:0051781	positive regulation of cell division		0.0008715	1	0.04741	0.4462	11	92	EREG,MDK,FGF7,VEGFD,RACGAP1,SSTR5,TGFA,TGFB2,TGFB3,THBS4,LBH
GO: Biological Process	GO:0014706	striated muscle tissue development		0.0008826	1	0.04764	0.4483	33	472	ERBB3,VGLL2,ACTA1,ACTN2,FHL2,SORBS2,PI16,SGCD,SGCG,UQCC2,ARNTL,SOX15,MYH6,MYL2,NACA,BCL2,MSTN,BMP5,BMP7,NPPA,CAPN3,TGFB2,TGFBR3,HEY2,TNNI3,PDGFRA,MYOZ1,GATA5,RIPOR2,MYLK3,TBX20,TSC22D3,LEF1
GO: Biological Process	GO:0006820	anion transport		0.000897	1	0.04783	0.45	45	709	ACACB,SLC24A4,FGFR4,LRRC8E,SFRP4,SLC25A5,SLC27A6,PPFIA4,APOE,AQP9,SLC1A7,SLCO2A1,RACGAP1,MPC1,SNCA,SLC16A10,GABRB3,GABRE,CPLX1,SLC46A1,PER2,SLC9A7,SLC38A3,CA3,SLC19A3,CLIC6,P2RY2,HBA1,HBA2,HBB,SLC26A4,TRPC4,CA14,ABCB1,PLA2G2A,FXYD3,CPT1A,IL1RN,TMEM30B,LCN12,SLCO4A1,AKR1C1,SLC16A9,RHAG,ACE2
GO: Biological Process	GO:0031032	actomyosin structure organization		0.0009	1	0.04783	0.45	19	218	ACTA1,SYNPO2L,ACTN2,LMOD2,RACGAP1,PHACTR1,MYH6,MYL2,BBS4,CAPN3,TGFB3,TNNT1,FRMD3,PDGFRA,MYOZ1,CCN2,MYLK3,KRT19,STMN1
GO: Biological Process	GO:0033993	response to lipid		0.0009227	1	0.04837	0.4552	59	999	ACTA1,MDK,F2R,ADCY1,ADCYAP1R1,MGST1,FCGR3A,CXCL9,CCL2,FGF10,FGFR4,FHL2,SELE,FOSB,APOB,ARNTL,SNCA,ATP2A2,CCND1,BCL2,SSTR5,MSTN,ARID5A,SOCS2,BMP7,FIBIN,GLRX,TRIM41,CXCL1,TGFB2,TGFB3,HAVCR2,TGFBR3,PDE4B,PDE4D,PDK4,PENK,HMGB2,HMGCL,CLU,NOCT,CPT1A,CCN2,IL1RN,CTSG,IL6,IL10RA,TRIM25,BRINP1,PTGS2,JAK2,KCNJ8,KCNMB1,LBH,NR4A3,PTPRU,ELANE,RORB,LEF1
GO: Biological Process	GO:0033275	actin-myosin filament sliding		0.0009244	1	0.04837	0.4552	7	41	ACTA1,ACTN2,MYH6,MYL2,TNNI3,TNNT1,TPM3
GO: Biological Process	GO:0072523	purine-containing compound catabolic process		0.0009454	1	0.04884	0.4596	8	53	AOX1,DNPH1,NT5C2,ADA2,NUDT4,PDE4A,PDE4B,PDE4D
GO: Biological Process	GO:0060395	SMAD protein signal transduction		0.0009475	1	0.04884	0.4596	10	79	NCEH1,MSTN,BMP5,BMP7,TGFB2,TGFB3,LEFTY2,GDF6,BMP8A,GDF15
GO: Cellular Component	GO:0062023	collagen-containing extracellular matrix		1.115e-09	8.922e-07	8.922e-07	6.479e-06	48	474	ADAM11,MDK,F13A1,S100A6,S100A13,MFAP2,MFAP4,AEBP1,FGF10,FMOD,APOE,ADAM19,AZGP1,NDP,SMOC2,BGN,BMP7,ADAMTS15,NPPA,CHADL,ADAMTS5,OMD,CBLN1,TGFB2,TGFB3,LEFTY2,THBS4,SERPINA5,COL22A1,VIT,SERPINE2,CLU,CTHRC1,COL9A1,COL16A1,ADAMTS4,GDF15,ADAMTSL5,CCN2,CTSG,RELN,HTRA1,ASPN,P3H2,ELANE,LTBP1,LTBP2,LUM
GO: Cellular Component	GO:0005887	integral component of plasma membrane		4.33e-09	3.464e-06	1.621e-06	1.177e-05	114	1710	ERBB3,EREG,CDHR1,CLEC1A,KCNIP2,F2R,F2RL2,ADCY1,ADCYAP1R1,FCER1A,SLC24A4,SCN1A,SCN2B,LRRTM4,LRRC7,FGFR4,GPNMB,SYT13,IL17RB,SELE,LRRC8E,RHCG,SLC25A5,SGCD,SGCG,ITGA10,AQP4,AQP9,SLC1A7,SLC5A1,SLC15A2,SLCO2A1,CSPG5,CORIN,ATP1A4,ATP2A2,MARCO,SLC16A10,GABRB3,GABRE,CADM3,SIGLEC9,SSTR5,TSPAN9,PROM1,LYVE1,ABCC8,NGFR,KCNMB4,MICA,NKG7,C6,C7,SLC38A3,ADGRD1,ADGRL3,DDR1,NPR3,PCDHGA6,SLC19A3,GRIA3,GRID1,GRIK2,GR…
GO: Cellular Component	GO:0031012	extracellular matrix		6.159e-09	4.927e-06	1.621e-06	1.177e-05	54	598	ADAM11,MDK,F13A1,S100A6,S100A13,MFAP2,MFAP4,AEBP1,LRRTM4,FGF10,FMOD,APOE,ADAM19,AZGP1,NDP,SMOC2,BGN,BMP7,ADAMTS15,NPPA,CHADL,ADAMTS5,OMD,CBLN1,TGFB2,TGFB3,LEFTY2,TGFBR3,THBS4,IL1RL1,SERPINA5,COL22A1,VIT,SERPINE2,CLU,CTHRC1,COL9A1,COL16A1,ADAMTS4,GDF15,RTN4RL1,LRRN3,ADAMTSL5,CCN2,CTSG,RELN,HTRA1,ASPN,UCMA,P3H2,ELANE,LTBP1,LTBP2,LUM
GO: Cellular Component	GO:0031226	intrinsic component of plasma membrane		8.106e-09	6.485e-06	1.621e-06	1.177e-05	117	1790	ERBB3,EREG,CDHR1,CLEC1A,KCNIP2,F2R,F2RL2,ADCY1,ADCYAP1R1,FCER1A,SLC24A4,SCN1A,SCN2B,LRRTM4,LRRC7,FGFR4,GPNMB,SYT13,IL17RB,SELE,LRRC8E,RHCG,SLC25A5,SGCD,SGCG,ITGA10,AQP4,AQP9,SLC1A7,SLC5A1,SLC15A2,SLCO2A1,CSPG5,CORIN,ATP1A4,ATP2A2,MARCO,SLC16A10,GABRB3,GABRE,CADM3,SIGLEC9,SSTR5,TSPAN9,PROM1,LYVE1,ABCC8,NGFR,KCNMB4,MICA,NKG7,C6,C7,SLC38A3,ADGRD1,ADGRL3,DDR1,NPR3,PCDHGA6,SLC19A3,GRIA3,GRID1,GRIK2,GR…
GO: Cellular Component	GO:0009986	cell surface		4.22e-05	0.03376	0.005679	0.04124	66	1036	MBP,CD109,MCAM,F2R,ADCYAP1R1,FCER1A,FCGR3A,CXCL9,FGF10,IL17RB,IL31RA,SFRP4,PPFIA4,APOE,AQP4,SCUBE2,CSPG5,CORIN,ADAM19,LAYN,AZGP1,SLC46A1,DLK1,NDP,TNFRSF10D,BGN,PROM1,ADAMTS15,NGFR,C3,MICA,TSPEAR,GRIN2A,TFRC,TGFA,TGFB2,TGFB3,HAVCR2,TGFBR3,THY1,P2RX1,ADAMTS7,IL1RL1,SERPINA5,PDGFRA,TRPC4,ABCB1,TNFRSF4,ITGBL1,SERPINE2,CLU,HSPA2,HJV,RTN4RL1,CTSG,IL6,PRLR,IL6R,ITGAE,ITGB8,KCNC4,KCNN2,ATP5IF1,TSPAN32,AC…
GO: Cellular Component	GO:1902495	transmembrane transporter complex		4.988e-05	0.03991	0.005679	0.04124	29	337	KCNIP2,SCN1A,SCN2B,LRRTM4,LRRC7,LRRC8E,ATP1A4,ATP2A2,UNC80,GABRB3,GABRE,ABCC8,KCNMB4,GRIA3,GRIK2,GRIK3,CLIC6,GRIN2A,ATP1B4,PDE4B,PDE4D,TRPC4,HSPA2,KCNC4,KCNJ4,KCNJ8,KCNMB1,GRIN3A,HCN4
GO: Cellular Component	GO:0031091	platelet alpha granule		5.018e-05	0.04014	0.005679	0.04124	13	92	CD109,ACTN2,F5,F13A1,VEGFD,SNCA,TGFB2,TGFB3,LEFTY2,SERPINA5,SERPINE2,CLU,CFD
GO: Cellular Component	GO:0043292	contractile fiber		6.939e-05	0.05551	0.005679	0.04124	24	259	ACTA1,SYNPO2L,ACTN2,SCN1A,FHL2,SORBS2,MYZAP,LMOD2,CHL1,MYH6,MYL2,MYL5,CAPN3,TNNI3,TNNT1,TPM3,PDE4B,MYL7,MYOZ1,KCNJ8,C10orf71,KCNN2,KRT19,MYOZ3
GO: Cellular Component	GO:0030017	sarcomere		7.099e-05	0.05679	0.005679	0.04124	22	227	ACTA1,SYNPO2L,ACTN2,SCN1A,FHL2,SORBS2,MYZAP,LMOD2,CHL1,MYH6,MYL2,CAPN3,TNNI3,TNNT1,TPM3,PDE4B,MYL7,MYOZ1,C10orf71,KCNN2,KRT19,MYOZ3
GO: Cellular Component	GO:1990351	transporter complex		7.584e-05	0.06067	0.005679	0.04124	29	345	KCNIP2,SCN1A,SCN2B,LRRTM4,LRRC7,LRRC8E,ATP1A4,ATP2A2,UNC80,GABRB3,GABRE,ABCC8,KCNMB4,GRIA3,GRIK2,GRIK3,CLIC6,GRIN2A,ATP1B4,PDE4B,PDE4D,TRPC4,HSPA2,KCNC4,KCNJ4,KCNJ8,KCNMB1,GRIN3A,HCN4
GO: Cellular Component	GO:0071682	endocytic vesicle lumen		7.82e-05	0.06256	0.005679	0.04124	6	20	SAA1,APOB,APOE,HBA1,HBA2,HBB
GO: Cellular Component	GO:0030016	myofibril		8.519e-05	0.06815	0.005679	0.04124	23	246	ACTA1,SYNPO2L,ACTN2,SCN1A,FHL2,SORBS2,MYZAP,LMOD2,CHL1,MYH6,MYL2,CAPN3,TNNI3,TNNT1,TPM3,PDE4B,MYL7,MYOZ1,KCNJ8,C10orf71,KCNN2,KRT19,MYOZ3
GO: Cellular Component	GO:0034702	ion channel complex		0.0002114	0.1691	0.01301	0.09447	26	313	KCNIP2,SCN1A,SCN2B,LRRTM4,LRRC7,LRRC8E,UNC80,GABRB3,GABRE,ABCC8,KCNMB4,GRIA3,GRIK2,GRIK3,CLIC6,GRIN2A,PDE4B,PDE4D,TRPC4,HSPA2,KCNC4,KCNJ4,KCNJ8,KCNMB1,GRIN3A,HCN4
GO: Cellular Component	GO:0034703	cation channel complex		0.0002661	0.2129	0.01521	0.1105	21	232	KCNIP2,SCN1A,SCN2B,LRRTM4,UNC80,ABCC8,KCNMB4,GRIA3,GRIK2,GRIK3,GRIN2A,PDE4B,PDE4D,TRPC4,HSPA2,KCNC4,KCNJ4,KCNJ8,KCNMB1,GRIN3A,HCN4
GO: Cellular Component	GO:0001527	microfibril		0.0003812	0.3049	0.02033	0.1476	4	10	MFAP2,MFAP4,ADAMTSL5,LTBP1
GO: Cellular Component	GO:0043005	neuron projection		0.000691	0.5528	0.03455	0.2509	88	1624	MORN4,MAP2,MAP4,CDHR1,MBP,ACTN2,ATAT1,ADCY1,ADCYAP1R1,SCN1A,CCL2,LRRC7,AMPH,IL31RA,SORBS2,INPP5F,APOE,CPNE5,NSG1,SNCA,BRSK1,FSCN1,UNC80,SAMD4A,CHL1,GABRB3,GABRE,KIF1A,SPOCK1,CPLX1,BBS4,RGS11,GCHFR,PROM1,GLRX,AP3M2,NGFR,GNB3,ADGRL3,NPTX2,CAMK2B,TSPEAR,GRIA3,GRIK2,GRIK3,GRIN2A,GRM1,TGFB2,THY1,P2RX1,P2RX6,ARHGAP33,TPM3,SNAPIN,PDE4B,DHRS3,PDGFRA,OPN3,PENK,PLEKHB1,MYL7,HEPACAM,UBB,CLU,UCHL1,SH3KBP1,GA…
GO: Cellular Component	GO:0099512	supramolecular fiber		0.0008	0.64	0.03754	0.2726	83	1521	MORN4,MNS1,MAP2,MAP4,ACTA1,SYNPO2L,TUBA3E,SKA2,ACTN2,ATAT1,MFAP2,MFAP4,SAA1,CYS1,HOOK1,SCN1A,LRRC7,FHL2,DNAH3,SORBS2,CAMSAP3,APOE,MYZAP,LMOD2,SLC5A1,EFHC2,RACGAP1,SNCA,FSCN1,KIF13A,SMTNL2,CHL1,NES,MYH6,MYL2,MYL5,KIF1A,LCA5L,SLC46A1,PROM1,DCLK2,MTCL1,TBCA,DDR1,NPTX2,TUBA3D,CAPN3,TPPP,TSPEAR,SPACA9,TNNI3,TNNT1,PCNT,TPM3,WDR66,PDE4B,PDGFRA,SLC26A4,WIPF3,MYL7,MYOZ1,ADAMTSL5,OSBPL3,CTSG,RIPOR2,LRRC49,…
GO: Cellular Component	GO:0030054	cell junction		0.0009149	0.7319	0.03754	0.2726	75	1352	CNKSR1,SYNPO2L,RPS10,MCAM,ACTN2,RRAS,ATAT1,ADCYAP1R1,SCN1A,LRRTM4,LRRC7,FGFR4,FHL2,AMPH,IL31RA,SORBS2,CAMSAP3,MYZAP,AQP4,SLC5A1,RND3,STXBP6,SNCA,BRSK1,FSCN1,ATP2A2,FAIM2,SAMD4A,PHACTR1,GABRB3,GABRE,CADM3,LAYN,CCND1,TSPAN9,NGFR,SDK1,ADGRL3,CAMK2B,DOK7,GRB7,GRIA3,GRID1,GRIK2,GRIK3,GRIN2A,CBLN1,HAVCR2,THY1,P2RX6,SNAPIN,PDGFRA,TRPC4,ABCB1,HEPACAM,ITGBL1,SH3KBP1,GABBR2,WTIP,CADPS2,ARHGAP24,AIF1L,ITGB8…
GO: Cellular Component	GO:0099081	supramolecular polymer		0.0009157	0.7326	0.03754	0.2726	83	1528	MORN4,MNS1,MAP2,MAP4,ACTA1,SYNPO2L,TUBA3E,SKA2,ACTN2,ATAT1,MFAP2,MFAP4,SAA1,CYS1,HOOK1,SCN1A,LRRC7,FHL2,DNAH3,SORBS2,CAMSAP3,APOE,MYZAP,LMOD2,SLC5A1,EFHC2,RACGAP1,SNCA,FSCN1,KIF13A,SMTNL2,CHL1,NES,MYH6,MYL2,MYL5,KIF1A,LCA5L,SLC46A1,PROM1,DCLK2,MTCL1,TBCA,DDR1,NPTX2,TUBA3D,CAPN3,TPPP,TSPEAR,SPACA9,TNNI3,TNNT1,PCNT,TPM3,WDR66,PDE4B,PDGFRA,SLC26A4,WIPF3,MYL7,MYOZ1,ADAMTSL5,OSBPL3,CTSG,RIPOR2,LRRC49,…
GO: Cellular Component	GO:0099080	supramolecular complex		0.0009514	0.7611	0.03754	0.2726	83	1530	MORN4,MNS1,MAP2,MAP4,ACTA1,SYNPO2L,TUBA3E,SKA2,ACTN2,ATAT1,MFAP2,MFAP4,SAA1,CYS1,HOOK1,SCN1A,LRRC7,FHL2,DNAH3,SORBS2,CAMSAP3,APOE,MYZAP,LMOD2,SLC5A1,EFHC2,RACGAP1,SNCA,FSCN1,KIF13A,SMTNL2,CHL1,NES,MYH6,MYL2,MYL5,KIF1A,LCA5L,SLC46A1,PROM1,DCLK2,MTCL1,TBCA,DDR1,NPTX2,TUBA3D,CAPN3,TPPP,TSPEAR,SPACA9,TNNI3,TNNT1,PCNT,TPM3,WDR66,PDE4B,PDGFRA,SLC26A4,WIPF3,MYL7,MYOZ1,ADAMTSL5,OSBPL3,CTSG,RIPOR2,LRRC49,…
GO: Cellular Component	GO:0031093	platelet alpha granule lumen		0.001032	0.8257	0.03754	0.2726	9	67	ACTN2,F5,F13A1,VEGFD,TGFB2,TGFB3,LEFTY2,CLU,CFD
GO: Cellular Component	GO:0097427	microtubule bundle		0.001044	0.8352	0.03754	0.2726	3	6	ATAT1,MTCL1,TPPP
GO: Cellular Component	GO:0045211	postsynaptic membrane		0.001079	0.8633	0.03754	0.2726	29	405	ERBB3,ACTN2,F2R,ADCY1,LRRTM4,LRRC7,SLC1A7,CSPG5,NSG1,FAIM2,GABRB3,GABRE,NPTX2,GRIA3,GRID1,GRIK2,GRIK3,GRIN2A,GRM1,CBLN1,P2RX1,P2RX6,GABBR2,CADPS2,LYPD1,KCNC4,KCNJ4,GRIN3A,FARP1
GO: Cellular Component	GO:0030018	Z disc		0.001456	1	0.04665	0.3388	14	145	SYNPO2L,ACTN2,SCN1A,FHL2,SORBS2,MYZAP,MYH6,CAPN3,PDE4B,MYOZ1,C10orf71,KCNN2,KRT19,MYOZ3
GO: Cellular Component	GO:0098688	parallel fiber to Purkinje cell synapse		0.001458	1	0.04665	0.3388	6	33	CADM3,GRIA3,GRIN2A,CBLN1,P2RX6,CADPS2
GO: Cellular Component	GO:0014801	longitudinal sarcoplasmic reticulum		0.001544	1	0.04723	0.343	2	2	DHRS7C,ATP2A2
GO: Cellular Component	GO:0036477	somatodendritic compartment		0.001594	1	0.04723	0.343	62	1096	MAP2,MBP,ACTN2,ADCY1,SCN1A,CCL2,LRRC7,SORBS2,APOB,INPP5F,APOE,CPNE5,NSG1,SNCA,FSCN1,SAMD4A,CHL1,KIF1A,CPLX1,RGS11,GCHFR,GLRX,NGFR,GNB3,NPTX2,CAMK2B,GRIA3,GRIK2,GRIK3,GRIN2A,GRM1,TGFB2,TGFB3,THY1,P2RX6,ARHGAP33,SEZ6L,PDE4B,PENK,MYL7,UBB,SERPINE2,CLU,UCHL1,RTN4RL1,IL6R,RELN,CYP11A1,BRINP1,ITPKA,KCNC4,KCNJ4,NECTIN1,KCNN2,GRIN3A,PDE11A,RAP1GAP,HCN4,PLXDC1,TTLL7,FARP1,LTBP1
GO: Cellular Component	GO:0005865	striated muscle thin filament		0.001713	1	0.048	0.3486	6	34	ACTA1,ACTN2,LMOD2,TNNI3,TNNT1,TPM3
GO: Cellular Component	GO:0019866	organelle inner membrane		0.00174	1	0.048	0.3486	38	596	CHDH,SLC25A34,MGST1,SLC25A5,UQCC2,CHCHD6,EFHD1,MTLN,MPC1,UQCRQ,SNCA,IFI6,SLC25A45,ATP5ME,TMEM126B,GATM,DMAC1,ATP1B4,P2RX1,P2RX6,TM7SF2,COX7A2L,DPY19L2P2,PDK4,HMGCL,HMGCS2,MRPL57,CLU,LETMD1,COX7A2,COX7B,CPT1A,NDUFA11,MRPL40,CYP11A1,EXOG,MRPL46,SDHAF4
Domain	IPR015615	TGF-beta-rel	InterPro	4.158e-06	0.01359	0.006251	0.05419	9	32	MSTN,BMP5,BMP7,TGFB2,TGFB3,LEFTY2,GDF6,BMP8A,GDF15
Domain	PF00688	TGFb_propeptide	Pfam	1.265e-05	0.04134	0.006251	0.05419	8	28	MSTN,BMP5,BMP7,TGFB2,TGFB3,LEFTY2,GDF6,BMP8A
Domain	IPR001111	TGF-b_N	InterPro	1.265e-05	0.04134	0.006251	0.05419	8	28	MSTN,BMP5,BMP7,TGFB2,TGFB3,LEFTY2,GDF6,BMP8A
Domain	PS00250	TGF_BETA_1	PROSITE	1.53e-05	0.05001	0.006251	0.05419	9	37	MSTN,BMP5,BMP7,TGFB2,TGFB3,LEFTY2,GDF6,BMP8A,GDF15
Domain	IPR001839	TGF-b_C	InterPro	1.53e-05	0.05001	0.006251	0.05419	9	37	MSTN,BMP5,BMP7,TGFB2,TGFB3,LEFTY2,GDF6,BMP8A,GDF15
Domain	PS51362	TGF_BETA_2	PROSITE	1.53e-05	0.05001	0.006251	0.05419	9	37	MSTN,BMP5,BMP7,TGFB2,TGFB3,LEFTY2,GDF6,BMP8A,GDF15
Domain	PF00019	TGF_beta	Pfam	1.53e-05	0.05001	0.006251	0.05419	9	37	MSTN,BMP5,BMP7,TGFB2,TGFB3,LEFTY2,GDF6,BMP8A,GDF15
Domain	SM00204	TGFB	SMART	1.53e-05	0.05001	0.006251	0.05419	9	37	MSTN,BMP5,BMP7,TGFB2,TGFB3,LEFTY2,GDF6,BMP8A,GDF15
Domain	IPR028082	Peripla_BP_I	InterPro	2.419e-05	0.07907	0.008785	0.07616	9	39	NPR3,GRIA3,GRID1,GRIK2,GRIK3,GRIN2A,GRM1,GABBR2,GRIN3A
Domain	IPR017948	TGFb_CS	InterPro	3.694e-05	0.1207	0.01169	0.1013	8	32	MSTN,BMP5,BMP7,TGFB2,TGFB3,LEFTY2,GDF6,BMP8A
Domain	SM00918	Lig_chan-Glu_bd	SMART	6.08e-05	0.1987	0.01169	0.1013	6	18	GRIA3,GRID1,GRIK2,GRIK3,GRIN2A,GRIN3A
Domain	SM00079	PBPe	SMART	6.08e-05	0.1987	0.01169	0.1013	6	18	GRIA3,GRID1,GRIK2,GRIK3,GRIN2A,GRIN3A
Domain	PF10613	Lig_chan-Glu_bd	Pfam	6.08e-05	0.1987	0.01169	0.1013	6	18	GRIA3,GRID1,GRIK2,GRIK3,GRIN2A,GRIN3A
Domain	IPR019594	Glu/Gly-bd	InterPro	6.08e-05	0.1987	0.01169	0.1013	6	18	GRIA3,GRID1,GRIK2,GRIK3,GRIN2A,GRIN3A
Domain	IPR001320	Iontro_rcpt	InterPro	6.08e-05	0.1987	0.01169	0.1013	6	18	GRIA3,GRID1,GRIK2,GRIK3,GRIN2A,GRIN3A
Domain	IPR001508	Iono_rcpt_met	InterPro	6.08e-05	0.1987	0.01169	0.1013	6	18	GRIA3,GRID1,GRIK2,GRIK3,GRIN2A,GRIN3A
Domain	PF00060	Lig_chan	Pfam	6.08e-05	0.1987	0.01169	0.1013	6	18	GRIA3,GRID1,GRIK2,GRIK3,GRIN2A,GRIN3A
Domain	IPR024824	GADD45	InterPro	7.456e-05	0.2437	0.01354	0.1174	3	3	GADD45B,GADD45G,GADD45A
Domain	IPR029034	Cystine-knot_cytokine	InterPro	9.051e-05	0.2958	0.01479	0.1282	11	67	IL17D,VEGFD,MSTN,BMP5,BMP7,TGFB2,TGFB3,LEFTY2,GDF6,BMP8A,GDF15
Domain	2.10.90.10	-	Gene3D	9.051e-05	0.2958	0.01479	0.1282	11	67	IL17D,VEGFD,MSTN,BMP5,BMP7,TGFB2,TGFB3,LEFTY2,GDF6,BMP8A,GDF15
Domain	PF01094	ANF_receptor	Pfam	0.0001128	0.3687	0.01676	0.1453	8	37	NPR3,GRIA3,GRID1,GRIK2,GRIK3,GRIN2A,GRM1,GABBR2
Domain	IPR001828	ANF_lig-bd_rcpt	InterPro	0.0001128	0.3687	0.01676	0.1453	8	37	NPR3,GRIA3,GRID1,GRIK2,GRIK3,GRIN2A,GRM1,GABBR2
Pathway	M5889	Ensemble of genes encoding extracellular matrix and extracellular matrix-associated proteins	MSigDB C2 BIOCARTA (v6.0)	2.184e-09	4.699e-06	4.699e-06	3.878e-05	84	1028	EREG,CD109,CLEC1A,ADAM11,IL17D,MDK,F13A1,S100A6,S100A13,MFAP2,MFAP4,AEBP1,CXCL9,CCL2,FGF7,FGF10,FGF12,C1QTNF3,CCL11,VEGFD,SFRP4,FMOD,P3H3,FCN3,SCUBE2,CSPG5,FRZB,ADAM19,SPOCK1,ADAM18,SMOC2,MSTN,BGN,BMP5,BMP7,ADAMTS15,TSPEAR,ESM1,CHADL,ADAMTS5,OMD,CBLN1,CXCL1,TGFA,TGFB2,TGFB3,LEFTY2,THBS4,ADAMTS7,SERPINA5,GDF6,COL22A1,VIT,PIK3IP1,SERPINE2,SEMA5B,CTHRC1,BMP8A,COL9A1,COL16A1,CHRDL2,ADAMTS4,GDF15,ADAM…
Pathway	M5885	Ensemble of genes encoding ECM-associated proteins including ECM-affilaited proteins, ECM regulators and secreted factors	MSigDB C2 BIOCARTA (v6.0)	1.321e-06	0.002842	0.001421	0.01172	60	753	EREG,CD109,CLEC1A,ADAM11,IL17D,MDK,F13A1,S100A6,S100A13,CXCL9,CCL2,FGF7,FGF10,FGF12,C1QTNF3,CCL11,VEGFD,SFRP4,P3H3,FCN3,SCUBE2,CSPG5,FRZB,ADAM19,ADAM18,MSTN,BMP5,BMP7,ADAMTS15,ADAMTS5,CBLN1,CXCL1,TGFA,TGFB2,TGFB3,LEFTY2,ADAMTS7,SERPINA5,GDF6,PIK3IP1,SERPINE2,SEMA5B,BMP8A,CHRDL2,ADAMTS4,GDF15,ADAMTSL5,CST2,CTF1,IL1RN,CTSG,IL6,MASP1,HTRA1,CLEC2B,PLXDC1,EDA,P3H2,ANGPTL4,ELANE
Pathway	M5883	Genes encoding secreted soluble factors	MSigDB C2 BIOCARTA (v6.0)	3.549e-06	0.007637	0.002546	0.02101	34	344	EREG,IL17D,MDK,S100A6,S100A13,CXCL9,CCL2,FGF7,FGF10,FGF12,CCL11,VEGFD,SFRP4,SCUBE2,FRZB,MSTN,BMP5,BMP7,CBLN1,CXCL1,TGFA,TGFB2,TGFB3,LEFTY2,GDF6,PIK3IP1,BMP8A,CHRDL2,GDF15,CTF1,IL1RN,IL6,EDA,ANGPTL4
Pathway	83073	Complement and coagulation cascades	BioSystems: KEGG	2.405e-05	0.05176	0.01294	0.1068	13	79	F2R,F2RL2,F5,F13A1,C1R,C3,C6,C7,SERPINA5,VSIG4,CLU,MASP1,CFD
Pathway	1270252	Molecules associated with elastic fibres	BioSystems: REACTOME	3.209e-05	0.06907	0.01381	0.114	8	31	MFAP2,MFAP4,BMP7,TGFB2,TGFB3,ITGB8,LTBP1,LTBP2
Pathway	M5882	Genes encoding proteoglycans	MSigDB C2 BIOCARTA (v6.0)	8.249e-05	0.1775	0.02864	0.2363	8	35	FMOD,SPOCK1,BGN,ESM1,CHADL,OMD,ASPN,LUM
Pathway	M917	Complement Pathway	MSigDB C2 BIOCARTA (v6.0)	9.364e-05	0.2015	0.02864	0.2363	6	19	C1R,C3,C6,C7,MASP1,CFD
Pathway	SMP00359	Diltiazem Pathway	SMPDB	0.0001198	0.2577	0.02864	0.2363	10	57	ATP1A4,ATP2A2,MYH6,MYL2,ABCC8,TNNI3,TPM3,KCNJ4,KCNJ8,HCN4
Pathway	SMP00375	Verapamil Pathway	SMPDB	0.0001198	0.2577	0.02864	0.2363	10	57	ATP1A4,ATP2A2,MYH6,MYL2,ABCC8,TNNI3,TPM3,KCNJ4,KCNJ8,HCN4
Pathway	1269868	Muscle contraction	BioSystems: REACTOME	0.0001478	0.318	0.0318	0.2624	21	204	ACTN2,KCNIP2,SCN1A,SCN2B,FGF12,MYL12A,CORIN,ATP1A4,ATP2A2,MYH6,MYL2,MYL5,NPPA,CAMK2B,TNNI3,TNNT1,TPM3,MYL7,FXYD3,KCNJ4,KCNK3
Pathway	114229	Hypertrophic cardiomyopathy (HCM)	BioSystems: KEGG	0.0001788	0.3847	0.03255	0.2686	12	83	SGCD,SGCG,ITGA10,ATP2A2,MYH6,MYL2,TGFB2,TGFB3,TNNI3,TPM3,IL6,ITGB8
Pathway	152665	Malaria	BioSystems: KEGG	0.0001815	0.3906	0.03255	0.2686	9	49	CCL2,SELE,TGFB2,TGFB3,THBS4,HBA1,HBA2,HBB,IL6
Pubmed	24952961	A high-resolution spatiotemporal atlas of gene expression of the developing mouse brain.	Pubmed	8.666e-21	8.145e-16	8.145e-16	9.796e-15	113	1849	ERBB3,EREG,MAP2,CDHR1,MBP,CD109,ETV4,KCNIP2,ADCY1,ADCYAP1R1,FAAH,MFAP4,MGST3,FGF7,FGF10,FGF12,FGFR4,VEGFD,FOXS1,SFRP4,SGCD,SCG5,VAT1L,APOE,AQP4,SLC5A1,ARNTL,STXBP6,FRZB,SNCA,CHL1,GABRB3,B3GALT2,GABRE,CADM3,NES,ADAM19,LAYN,DLK1,BCL2,SMOC2,MSTN,PROM1,BMP5,BMP7,PER2,NGFR,KCNMB4,CA3,DDR1,CUX2,GRIA3,GRID1,GRIK2,GRIK3,GRIN2A,RUNX2,GRM1,TGFA,TGFB2,TGFB3,LEFTY2,TGFBR3,HEY2,MAEL,TNNT1,PCBD1,NXPH4,PCNT,TPD…
Pubmed	27626380	High-throughput discovery of novel developmental phenotypes.	Pubmed	1.566e-12	1.472e-07	7.358e-08	8.85e-07	86	1623	LYPLAL1,CD109,MCAM,SKA2,MDK,F13A1,ADCYAP1R1,AFMID,S100A6,MFAP4,SLC24A4,MGST3,CXCL9,COA5,FGF7,FGF10,FGFR4,GPNMB,ALDH3B1,IL31RA,SORBS2,NUDT14,P3H3,FOSB,RAB20,CPNE5,RND3,CDC26,NSG1,DACT3,ATP2A2,NES,GATM,IL20RA,BBS4,SMOC2,RAB24,ADAMTS15,NGFR,C3,NKG7,ADGRD1,ADGRL3,GRK5,VXN,TPPP,GRB7,PKIG,ZDHHC23,P2RX6,MTURN,ARHGAP33,SEZ6L,SNAPIN,SDSL,PDK4,PENK,TRIP13,C16orf89,MYOZ1,CLU,GPSM2,HJV,PPDPF,MAP3K8,GDF15,PPP…
Pubmed	20237496	New genetic associations detected in a host response study to hepatitis B vaccine.	Pubmed	4.706e-12	4.423e-07	1.474e-07	1.773e-06	55	825	CHDH,IL17D,F2R,F13A1,SAA1,FCER1A,CXCL9,CCL2,CCL11,ALDH3B1,VEGFD,IL17RB,IL31RA,BIRC3,FCN3,IFI6,MARCO,CADM3,SIGLEC9,IL20RA,BCL2,TNFRSF10D,MSTN,BLM,SOCS2,BMP7,NGFR,C3,MICA,C6,C7,SOCS3,ESM1,CXCL1,TGFB2,TGFB3,IL1RL1,SNAPIN,HEPACAM,BMP8A,GDF15,PPP2R2B,CCN2,IL1RN,IL6R,IL10RA,AIF1L,ITGAE,ITGB8,GAB2,CLEC2B,EDA,IFNLR1,RLN2,LSP1
Pubmed	12975309	The secreted protein discovery initiative (SPDI), a large-scale effort to identify novel human secreted and transmembrane proteins: a bioinformatics assessment.	Pubmed	2.196e-11	2.064e-06	5.159e-07	6.206e-06	60	987	CLEC1A,SCN2B,LRRTM4,C1QTNF3,GPNMB,C5orf46,IL17RB,IL31RA,PI16,ITGA10,ALKAL2,FCN3,LCN6,DLK2,GALNT15,CADM3,LAYN,SIGLEC9,ADAM18,IL20RA,TNFRSF10D,ARID5A,LYVE1,PRRT3,B3GNT9,SHISA2,OMD,TMX4,FAM124A,NXPH4,EDA2R,SEZ6L,DHRS3,VSIG4,CA14,CYTL1,VIT,C16orf89,SEMA5B,CTHRC1,CHRDL2,ADAMTS4,CDCP1,LRRN3,ITPRIP,ASPN,AIF1L,STEAP2,RETSAT,LYPD1,TMCO3,TMEM231,CRISPLD1,PLD4,METTL7B,ACE2,ANGPTL4,ST8SIA2,TMEM143,HSD17B14
Pubmed	24194600	The International Mouse Phenotyping Consortium Web Portal, a unified point of access for knockout mice and related phenotyping data.	Pubmed	2.964e-11	2.786e-06	5.571e-07	6.701e-06	62	1047	RIN3,LYPLAL1,MCAM,SKA2,ADAM11,MDK,ADCYAP1R1,AFMID,S100A6,SLC24A4,FGF7,FGF10,FGFR4,GPNMB,IL31RA,SORBS2,NUDT14,P3H3,RAB20,CPNE5,NSG1,FSCN1,ATP2A2,NES,IL20RA,BBS4,SLC46A1,SMOC2,C12orf57,RAB24,C3,NKG7,DOK7,TPPP,ODC1,TGFB3,ZDHHC23,MTURN,ARHGAP33,SNAPIN,PDK4,PENK,HMGN2,TRIP13,YPEL1,C16orf89,HJV,CRYM,SYNE3,IL6R,TMEM30B,MASP1,PHF19,AIF1L,ITGAE,RAD9A,METTL7B,PTPRU,VPS13D,ELF3,LUM,SNX22
Pubmed	28005267	Human gingiva transcriptome during wound healing.	Pubmed	5.771e-11	5.423e-06	9.039e-07	1.087e-05	18	107	FCGR3A,SELE,SFRP4,ASIP,CORIN,FAIM2,LYVE1,ADAMTS15,MIR4435-2HG,TSPEAR,GRIK3,HK3,VSIG4,CTHRC1,ADAMTS4,CCN2,IL6,CYTOR
Pubmed	23533145	In-depth proteomic analyses of exosomes isolated from expressed prostatic secretions in urine.	Pubmed	1.945e-10	1.828e-05	2.482e-06	2.985e-05	61	1070	ACTA1,ACTN2,H2AC6,SAA1,FASN,FCGR3A,RHCG,APOB,APOE,DNPH1,CPNE5,ARHGAP1,FRK,CHL1,AZGP1,STK26,GATM,BGN,GPD1L,PROM1,LYVE1,H2AW,C1R,C3,C6,C7,GNB3,NPR3,GPRC5A,OMD,THBS4,THY1,HBA1,HBA2,HBB,PCBD1,SERPINA5,DDAH2,DDAH1,ABCB1,C16orf89,UBB,CLU,QPCT,PLA2G2A,GDF15,RTN4RL1,CRYM,CTSG,AKR1C1,DDT,CFD,CRISPLD1,STEAP4,LDHA,ACE2,RNASE2,ELANE,LTBP2,CPNE4,LUM
Pubmed	15342556	Sequence comparison of human and mouse genes reveals a homologous block structure in the promoter regions.	Pubmed	2.113e-10	1.986e-05	2.482e-06	2.985e-05	69	1293	B3GNT5,TBC1D7,CD109,SNAPC5,ETV4,ATAT1,F13A1,ADH1B,MFAP4,FHL2,SYT13,SCG5,BCAS4,NUDT4B,NT5C2,OGDHL,MCTP2,GADD45B,ATP6V1G2,SIGLEC9,EXPH5,TMEM126B,C12orf57,BLM,GLRX,C3,SLC38A3,HAVCR2,NUDT4,ISCU,EDA2R,COX14,PCNT,TPD52L1,PENK,VSIG4,PEX7,CA14,HMOX1,HMOX2,DUSP26,ITGBL1,UBB,CLU,UCHL1,TNFAIP8,CHST7,PPDPF,MAP3K8,SH3KBP1,PPP2R2B,MRPL40,CADPS2,PRLR,ASPN,FBXL12,MAP3K7CL,LYPD1,TXNL4B,CRISPLD1,RAP1GAP,ATP5IF1,HC…
Pubmed	24154525	Conserved molecular signatures of neurogenesis in the hippocampal subgranular zone of rodents and primates.	Pubmed	1.159e-09	0.0001089	1.21e-05	0.0001456	30	349	MBP,ATAT1,FASN,MGST3,FGF12,SGCD,APOE,CPNE5,AQP4,CSPG5,SPOCK1,CPLX1,H2AW,CUX2,THBS4,CDS1,PLEKHB1,HEPACAM,SERPINE2,CLU,PLP1,COX7B,CADPS2,RELN,STEAP2,PTGS1,DIO2,PDE11A,STMN1,LSAMP
Pubmed	27068509	Extracellular matrix remodelling in response to venous hypertension: proteomics of human varicose veins.	Pubmed	1.583e-09	0.0001488	1.488e-05	0.0001789	19	146	MCAM,S100A6,S100A13,MFAP4,AEBP1,FMOD,APOB,APOE,AZGP1,BGN,CLU,CTHRC1,COL16A1,CTSG,HTRA1,ASPN,LTBP1,LTBP2,LUM
Pubmed	24667918	Differential effects of Tat proteins derived from HIV-1 subtypes B and recombinant CRF02_AG on human brain microvascular endothelial cells: implications for blood-brain barrier dysfunction.	Pubmed	3.002e-09	0.0002822	2.565e-05	0.0003085	16	105	F13A1,ADH1B,TC2N,PLA1A,CCL2,FGF7,FGF10,C3,C7,NPR3,SLC19A3,ESM1,CXCL1,PCDH15,STEAP4,RORB
Pubmed	23376485	Proteomic analysis of podocyte exosome-enriched fraction from normal human urine.	Pubmed	3.712e-09	0.0003488	2.907e-05	0.0003496	81	1744	MAP4,LYPLAL1,RPS10,ACTN2,RRAS,S100A6,S100A13,MFAP4,CYS1,MGST3,PLA1A,FCGR3A,PTRHD1,ALDH3B1,NUDT14,SLC25A5,PI16,APOE,DNPH1,SLC5A1,MYL12A,RND3,ARHGAP1,FRK,EFHD1,DLK2,AZGP1,NACA,GATM,BGN,GPD1L,PROM1,LYVE1,GLRX,C3,C7,SDK1,TBCA,GPD1,DDR1,NPR3,GPRC5A,HAVCR2,TGFBR3,THY1,HAAO,HBA1,HBA2,HBB,PCBD1,SERPINA5,SDSL,DDAH2,DDAH1,SLC26A4,VSIG4,ABCB1,PIK3IP1,C16orf89,GPR180,UBB,CLU,UCHL1,QPCT,GDF15,COX7A2,CRYM,IL1R…
Pubmed	11238910	Cardiomyopathy in Irx4-deficient mice is preceded by abnormal ventricular gene expression.	Pubmed	4.264e-09	0.0004007	3.083e-05	0.0003708	9	26	ACTA1,FGF12,ATP2A2,MYH6,MYL2,NPPA,MYL7,IRX1,IRX2
Pubmed	28611215	Genome-wide CRISPR screen identifies HNRNPL as a prostate cancer dependency regulating RNA splicing.	Pubmed	5.651e-09	0.0005311	3.447e-05	0.0004146	72	1489	SPTLC3,MAP2,MAP4,MBP,SAMD12,ATAT1,KCNIP2,ADCY1,PLEKHH1,AFMID,LRRC7,AMD1,SHB,CAMSAP3,CHCHD6,C7orf50,PACS1,EFHD1,NT5C2,MPP6,MCTP2,SH3RF3,GABRE,KIF1A,CCND1,SMOC2,TSPAN9,ABCC8,SLC9A7,KIAA0556,DCLK2,ADGRD1,DDR1,CAMK2B,GRIK2,GTF2H2,PCNX4,SERINC5,NXPH4,FRMD3,PCNT,CDS1,PDE4D,DHRS3,TMC6,TRIP13,TNFAIP8,RTN4RL1,CPT1A,DNTTIP1,VSTM2L,IL6R,PTDSS1,STEAP2,GALNT18,DDT,JAK2,PTPRR,TXNL4B,KCNN2,MIR99AHG,CLBA1,SLC16A…
Pubmed	24006456	Extracellular matrix secretion by cardiac fibroblasts: role of microRNA-29b and microRNA-30c.	Pubmed	5.865e-09	0.0005511	3.447e-05	0.0004146	23	230	CD109,MFAP4,PLA1A,AEBP1,CCL2,VEGFD,FMOD,FRZB,BGN,C3,ADAMTS5,TGFB2,ADAMTS7,GDF6,ITGBL1,SERPINE2,CLU,CTHRC1,CCN2,HTRA1,LTBP1,LTBP2,LUM
Pubmed	20634891	Maternal genes and facial clefts in offspring: a comprehensive search for genetic associations in two population-based cleft studies from Scandinavia.	Pubmed	5.869e-09	0.0005516	3.447e-05	0.0004146	28	331	F13A1,ADH1B,FGF7,FGF10,FGF12,C1QTNF3,FGFR4,APOB,APOE,FSCN1,CHL1,GABRB3,MYL2,GNMT,SULT1A1,CUX2,RUNX2,TGFA,TGFB2,TGFB3,LEFTY2,TGFBR3,PDGFRA,PEX7,ABCB1,GABBR2,NECTIN1,LEF1
Pubmed	15340161	Signal peptide prediction based on analysis of experimentally verified cleavage sites.	Pubmed	1.79e-08	0.001682	9.894e-05	0.00119	24	264	MDK,MFAP4,FGFR4,IL17RB,IL31RA,FCN3,FRZB,CADM3,AZGP1,IL20RA,DLK1,TNFRSF10D,PRRT3,SHISA2,CXCL1,IL1RL1,VSIG4,CYTL1,PIK3IP1,SERPINE2,CTHRC1,CHRDL2,CST2,IL10RA
Pubmed	15226823	Genomic analysis of mouse retinal development.	Pubmed	2.12e-08	0.001992	0.0001107	0.001331	52	957	MAP2,CDHR1,ATAT1,ARRDC3,SLC25A5,SCG5,SLC1A7,MTLN,RACGAP1,MPC1,PHACTR1,GABRB3,NES,CPLX1,CCND1,BMP7,RAB24,NGFR,KIAA0556,SLC38A3,DDR1,TGFA,THY1,SERINC5,CDS1,WDR66,DDAH1,PDGFRA,HMGB2,HMGN2,COL22A1,CHGB,DUSP26,CLU,LETMD1,COL16A1,CPT1A,CLIP3,CRYM,RGS9BP,HSPB6,TRNP1,LRRC49,SLCO4A1,DBP,CDCA2,PTPRR,DIO2,WIPI1,STMN1,RORB,MAB21L1
Pubmed	20562862	A mouse knockout library for secreted and transmembrane proteins.	Pubmed	2.669e-08	0.002508	0.000132	0.001588	30	400	CLEC1A,IL17D,SCN2B,LRRTM4,C1QTNF3,C5orf46,IL31RA,LCN6,CADM3,LAYN,ADAM18,SHISA2,NXPH4,SEZ6L,DHRS3,CYTL1,VIT,C16orf89,CTHRC1,CHRDL2,CDCP1,LRRN3,ASPN,STEAP2,RETSAT,LYPD1,TMCO3,CRISPLD1,ACE2,HSD17B14
Pubmed	15031101	Analysis of genes from inner ear developmental-stage cDNA subtraction reveals molecular regionalization of the otic capsule.	Pubmed	4.547e-08	0.004273	0.0002137	0.00257	9	33	MDK,TGFB2,PDE4B,HMGN2,CYTL1,CLU,COL9A1,LYPD1,LUM
Pubmed	19834535	Sequential use of transcriptional profiling, expression quantitative trait mapping, and gene association implicates MMP20 in human kidney aging.	Pubmed	7.656e-08	0.007195	0.0003426	0.004121	14	99	MAP4,ADCY1,GPNMB,MPC1,FIBIN,C3,C7,CLIC6,ADAMTS5,TGFB2,THBS4,COX7A2L,RGS6,RARRES1
Pubmed	19948975	Integrative predictive model of coronary artery calcification in atherosclerosis.	Pubmed	1.186e-07	0.01115	0.0005066	0.006094	21	229	ACTA1,F5,F13A1,ADH1B,SORCS1,CCL2,CCL11,SELE,APOB,APOE,ARMS2,C3,GNB3,NPPA,PDE4D,RGS9BP,IL1RN,IL6,HTRA1,PTGS1,PTGS2
Pubmed	16314518	Mammalian E4 is required for cardiac development and maintenance of the nervous system.	Pubmed	1.291e-07	0.01213	0.0005275	0.006345	6	12	ACTN2,MYH6,MYL2,NPPA,MYL7,GATA5
Pubmed	17207965	hORFeome v3.1: a resource of human open reading frames representing over 10,000 human genes.	Pubmed	1.395e-07	0.01311	0.0005462	0.00657	74	1677	VGLL2,TBC1D7,TMEM74,TUBA3E,SKA2,IFT43,MFAP4,H2BC21,MGST3,PLA1A,FCGR3A,PTRHD1,CXCL9,ARRDC3,SMIM19,SLC25A5,VAT1L,AQP4,FAM228B,CDC26,CCDC74A,FAIM2,SLC25A45,B3GALT2,GABRE,DLK1,TNFRSF10D,C9orf24,CA3,SERTM1,TUBA3D,RALYL,C19orf48,ESM1,HAVCR2,GTF2H2,P2RX1,MAEL,NXPH4,EDA2R,COX14,CENPA,CIART,PEX7,DUSP26,QPCT,TNFAIP8,C11orf71,HJV,MEAF6,LETMD1,NRIP3,DNTTIP1,STAG3L4,CST2,PHF19,FBXL12,DELE1,IDI2,TXNL4B,SPATA4,…
Pubmed	18614015	A mitochondrial protein compendium elucidates complex I disease biology.	Pubmed	1.697e-07	0.01595	0.0006379	0.007673	50	965	ACACB,CHDH,SLC25A34,ACYP2,FASN,COA5,SLC25A5,UQCC2,EFHD1,MPC1,UQCRQ,SLC25A45,ATP5ME,GATM,BCL2,SMIM4,ADHFE1,RAB24,GLRX,GPD1,DEPP1,ISCU,COX7A2L,COX14,SDSL,DDAH1,HK3,PDK4,HMGCL,HMGCS2,ABCB1,DUSP26,MRPL57,LETMD1,COX7A2,COX7B,CPT1A,NDUFA11,MRPL40,ABHD11,CYP11A1,DELE1,EXOG,HSD17B8,ATP5IF1,LDHA,AASS,TMEM143,MRPL46,SDHAF4
Pubmed	8827514	Genetic regulation of cholesterol homeostasis: chromosomal organization of candidate genes.	Pubmed	1.832e-07	0.01722	0.0006623	0.007966	14	106	CCL2,APOB,APOE,ASIP,C3,SLC38A3,NPPA,HMGCS2,HMOX1,CLU,PLA2G2A,PLP1,PTGS1,PTGS2
Pubmed	16335952	Human plasma N-glycoproteome analysis by immunoaffinity subtraction, hydrazide chemistry, and mass spectrometry.	Pubmed	1.999e-07	0.01878	0.0006831	0.008217	22	257	CD109,F5,F13A1,MFAP4,APOB,FCN3,MARCO,CHL1,AZGP1,LYVE1,C1R,C3,C6,C7,TFRC,CNTN3,SERPINA5,CLU,CHST7,IL1RN,NECTIN1,LUM
Pubmed	31536960	Rewiring of the Human Mitochondrial Interactome during Neuronal Reprogramming Reveals Regulators of the Respirasome and Neurogenesis.	Pubmed	2.035e-07	0.01913	0.0006831	0.008217	46	858	LYPLAL1,MCAM,FASN,MGST1,MGST3,PTRHD1,SLC25A5,APOE,MYL12A,UQCRQ,ATP2A2,ATP5ME,PROM1,MLLT11,TBCA,GPRC5A,TFRC,C1orf198,THY1,TMX4,COX7A2L,DDAH2,DDAH1,HMGCL,PFDN4,HMOX2,UCHL1,HSPA2,RAB26,COX7A2,COX7B,SPATA20,CPT1A,NDUFA11,ISG15,ABHD11,KCNMB1,DIO2,LDHA,BOLA3,AASS,P3H2,ELANE,LTBP2,LUM,LONRF3
Pubmed	20424473	L-type voltage-dependent calcium channel alpha subunit 1C is a novel candidate gene associated with secondary hyperparathyroidism: an application of haplotype-based analysis for multiple linked single nucleotide polymorphisms.	Pubmed	2.837e-07	0.02666	0.0009193	0.01106	16	144	FGF10,AQP9,SLC1A7,SLC5A1,SLC15A2,SLCO2A1,BMP7,TFRC,TGFBR3,PDGFRA,BMP8A,GABBR2,IL10RA,KCNJ4,KCNMB1,LTBP2
Pubmed	28729659	Identification of a hybrid myocardial zone in the mammalian heart after birth.	Pubmed	3.001e-07	0.0282	0.0009401	0.01131	4	4	NPPA,NPR3,HEY2,TNNI3
Pubmed	18554416	Identification of transcripts with enriched expression in the developing and adult pancreas.	Pubmed	3.581e-07	0.03365	0.001086	0.01306	35	577	ACTN2,MDK,FKBP11,FAAH,MFAP2,MGST3,C12orf45,SYT13,CDC26,FRZB,TTC39A,ATP2A2,NACA,RGS11,GNMT,BGN,GADD45G,ABCC8,ADAMTS15,NPPA,P2RX1,TNNI3,PCBD1,CHGB,MYL7,CLU,FXYD3,CCN2,PTDSS1,KCNMB1,RAP1GAP,S1PR3,ACE2,ELF3,IRX2
Pubmed	21491433	Cell-type-specific consequences of Reelin deficiency in the mouse neocortex, hippocampus, and amygdala.	Pubmed	5.068e-07	0.04763	0.001488	0.0179	12	83	RASL11B,DLK1,FAM160A1,SERTM1,VXN,NXPH4,CCN2,PRLR,RELN,PDE11A,PTPRU,RORB
Pubmed	20734064	A large-scale candidate gene association study of age at menarche and age at natural menopause.	Pubmed	6.366e-07	0.05982	0.001767	0.02126	22	275	B3GNT5,F5,APOE,DOK5,SSTR5,MSTN,BMP5,BMP7,SULT1A1,ABCC8,GNB3,TGFB2,TGFB3,LEFTY2,TGFBR3,GDF6,PENK,GABBR2,IL1RN,IL6,PRLR,CYP11A1
Pubmed	28675425	Foxc2 influences alveolar epithelial cell differentiation during lung development.	Pubmed	6.586e-07	0.06189	0.001767	0.02126	6	15	FGF7,FGF10,LYVE1,TGFB2,TGFB3,LEF1
Pubmed	17468400	Essential roles of the bHLH transcription factor Hrt2 in repression of atrial gene expression and maintenance of postnatal cardiac function.	Pubmed	6.586e-07	0.06189	0.001767	0.02126	6	15	ACTA1,MYH6,MYL2,NPPA,HEY2,MYL7
Pubmed	20551380	Proteomics characterization of extracellular space components in the human aorta.	Pubmed	6.77e-07	0.06362	0.001767	0.02126	13	101	MFAP4,AEBP1,FMOD,APOE,FRZB,BGN,CLU,CTSG,HTRA1,ASPN,LTBP1,LTBP2,LUM
Pubmed	28327460	Comprehensive proteomic characterization of stem cell-derived extracellular matrices.	Pubmed	7.507e-07	0.07054	0.001907	0.02293	12	86	MDK,MFAP2,AEBP1,BGN,SERPINA5,SERPINE2,COL16A1,GDF15,CCN2,HTRA1,LTBP1,LTBP2
Pubmed	26487682	Knockout of Lmod2 results in shorter thin filaments followed by dilated cardiomyopathy and juvenile lethality.	Pubmed	7.923e-07	0.07446	0.001959	0.02357	5	9	ACTA1,LMOD2,ATP2A2,MYH6,NPPA
Pubmed	16169070	A human protein-protein interaction network: a resource for annotating the proteome.	Pubmed	1.09e-06	0.1025	0.002628	0.03161	71	1675	ERBB3,MAP4,RPS10,ACTN2,ADAM11,MDK,S100A13,H2AC6,MGST3,CCL11,SORBS2,SLC27A6,SCG5,CAMSAP3,PLEKHA4,CCDC113,PELP1,RACGAP1,MPC1,UQCRQ,FSCN1,MYL2,NACA,FRS3,LSM3,C6,SLC38A3,WWC1,GPD1,TCEA2,DDR1,ADAP1,TRIM41,SOCS3,SPACA9,HBA1,HBA2,TNNT1,HBB,SERPINA5,TPD52L1,SNAPIN,PFDN1,HMGCL,CHGB,HMOX2,PPP1R15A,TRIP13,UBB,UCHL1,PLA2G2A,FXYD3,GABBR2,SYNE3,ISG15,PHACTR3,IL6,FBXL12,ITGAE,GADD45A,CFD,AK5,KIF22,RAP1GAP,WIPI1…
Pubmed	24595293	Ccm3, a gene associated with cerebral cavernous malformations, is required for neuronal migration.	Pubmed	1.215e-06	0.1142	0.002854	0.03433	7	25	MAP2,NES,CUX2,CCN2,RELN,TMEM163,RORB
Pubmed	19240061	Coeliac disease-associated risk variants in TNFAIP3 and REL implicate altered NF-kappaB signalling.	Pubmed	1.324e-06	0.1245	0.003036	0.03652	21	265	ERBB3,SORBS2,CHCHD6,SLC15A2,MARCO,NGFR,DMAC1,SH2D2A,ORC5,P2RX6,HAAO,PDE4B,TYRP1,ITGBL1,IRX1,IL6,CYP11A1,GALNT18,PCDH15,LBH,IFNLR1
Pubmed	22008794	Integrated microarray and ChIP analysis identifies multiple Foxa2 dependent target genes in the notochord.	Pubmed	1.389e-06	0.1305	0.003062	0.03683	15	143	F5,KLHL32,RAB20,ERICH2,CHL1,CA3,GRIK3,MTURN,SDSL,COL22A1,VIT,CLU,CCN2,IGSF1,HTRA1
Pubmed	28383060	Phosphodiesterase 4B negatively regulates endotoxin-activated interleukin-1 receptor antagonist responses in macrophages.	Pubmed	1.438e-06	0.1351	0.003062	0.03683	4	5	PDE4A,PDE4B,PDE4D,IL1RN
Pubmed	8798433	Primary structure, neural-specific expression, and chromosomal localization of Cux-2, a second murine homeobox gene related to Drosophila cut.	Pubmed	1.438e-06	0.1351	0.003062	0.03683	4	5	ATP5ME,AZGP1,CUX2,MAFK
Pubmed	23383108	Modulation of cytokine release and gene expression by the immunosuppressive domain of gp41 of HIV-1.	Pubmed	1.471e-06	0.1382	0.003062	0.03683	13	108	EREG,CXCL9,CCL2,GPNMB,SCG5,AQP9,SLC16A10,NDP,CXCL1,VSIG4,G0S2,IL6,PTGS2
Pubmed	11572777	A murine model of Holt-Oram syndrome defines roles of the T-box transcription factor Tbx5 in cardiogenesis and disease.	Pubmed	1.565e-06	0.1471	0.003062	0.03683	6	17	MYH6,MYL2,NPPA,HEY2,MYL7,TBX20
Pubmed	25079316	Glial origin of mesenchymal stem cells in a tooth model system.	Pubmed	1.565e-06	0.1471	0.003062	0.03683	6	17	ERBB3,MBP,NGFR,THY1,UCHL1,PLP1
Pubmed	26493106	APC controls asymmetric Wnt/?-catenin signaling and cardiomyocyte proliferation gradient in the heart.	Pubmed	1.629e-06	0.1531	0.003062	0.03683	7	26	MYH6,MYL2,CCND1,NPPA,PDGFRA,MYL7,TBX20
Pubmed	22130515	Tbx2 and Tbx3 induce atrioventricular myocardial development and endocardial cushion formation.	Pubmed	1.629e-06	0.1531	0.003062	0.03683	7	26	MDK,FRZB,NPPA,TGFB2,HCN4,LUM,LEF1
Pubmed	19282863	Association of candidate gene polymorphisms with chronic kidney disease in Japanese individuals with hypertension.	Pubmed	1.629e-06	0.1531	0.003062	0.03683	7	26	APOB,APOE,PDE4D,HMOX1,IL6,PTGS1,KCNMB1
Pubmed	23251661	Novel genetic loci identified for the pathophysiology of childhood obesity in the Hispanic population.	Pubmed	1.883e-06	0.177	0.00347	0.04174	42	815	ERBB3,VGLL3,CD109,EXT1,FCER1A,NCEH1,LRRC7,FMOD,SGCD,SCG5,SAMD4A,CHL1,LAYN,SRRM4,SDK1,GRK5,PYROXD2,SLC19A3,GRIK2,PKHD1L1,TGFA,PCBD1,PDE4D,TRPC4,PFDN4,HMOX1,ITGBL1,SRP14-AS1,XPA,CPT1A,IL1RN,IL10RA,TMEM30B,ARHGAP24,PTDSS1,C2CD4C,KCNN2,MIR99AHG,GRIN3A,ARMC4,TTLL7,FARP1
Pubmed	21983003	Myocardial Tbx20 regulates early atrioventricular canal formation and endocardial epithelial-mesenchymal transition via Bmp2.	Pubmed	2.155e-06	0.2025	0.003847	0.04628	7	27	MYH6,BMP7,NPPA,TGFB2,HEY2,MYL7,TBX20
Pubmed	19729601	Candidate gene polymorphisms for ischemic stroke.	Pubmed	2.182e-06	0.205	0.003847	0.04628	10	64	F5,F13A1,CCL2,CCL11,SELE,APOB,APOE,NPPA,IL1RN,IL6
Pubmed	19056482	Association of a polymorphism of the apolipoprotein E gene with chronic kidney disease in Japanese individuals with metabolic syndrome.	Pubmed	2.211e-06	0.2078	0.003847	0.04628	11	79	CCL11,SELE,APOB,APOE,ABCC8,GNB3,PDE4D,HMOX1,CTSG,PTGS1,PTGS2
Pubmed	28846746	CTCF counter-regulates cardiomyocyte development and maturation programs in the embryonic heart.	Pubmed	2.301e-06	0.2162	0.003861	0.04644	6	18	NPPA,TNNI3,TNNT1,IRX1,PTGS1,IRX2
Pubmed	16059910	Transcriptome analysis of the murine forelimb and hindlimb autopod.	Pubmed	2.301e-06	0.2162	0.003861	0.04644	6	18	MBP,FRZB,BMP5,BMP7,CBLN1,TBX20
Pubmed	22682244	Multifocal epithelial tumors and field cancerization from loss of mesenchymal CSL signaling.	Pubmed	2.77e-06	0.2603	0.00422	0.05076	12	97	EREG,MDK,S100A6,FGF10,VEGFD,MSTN,BMP7,TGFA,TGFB2,TGFB3,LEFTY2,IL6
Pubmed	12122109	The Polycomb-group gene Rae28 sustains Nkx2.5/Csx expression and is essential for cardiac morphogenesis.	Pubmed	2.794e-06	0.2626	0.00422	0.05076	5	11	ATP2A2,MYH6,MYL2,NPPA,MYL7
Pubmed	16374517	Inactivation of focal adhesion kinase in cardiomyocytes promotes eccentric cardiac hypertrophy and fibrosis in mice.	Pubmed	2.794e-06	0.2626	0.00422	0.05076	5	11	ACTA1,ATP2A2,MYH6,MYL2,NPPA
Pubmed	10926765	Patterning the embryonic heart: identification of five mouse Iroquois homeobox genes in the developing heart.	Pubmed	2.794e-06	0.2626	0.00422	0.05076	5	11	ATP2A2,MYL2,NPPA,IRX1,IRX2
Pubmed	15901664	Tbx20 is essential for cardiac chamber differentiation and repression of Tbx2.	Pubmed	2.815e-06	0.2646	0.00422	0.05076	7	28	FGF10,MYH6,MYL2,NPPA,HEY2,MYL7,TBX20
Pubmed	22723691	Tlx1/3 and Ptf1a control the expression of distinct sets of transmitter and peptide receptor genes in the developing dorsal spinal cord.	Pubmed	2.843e-06	0.2672	0.00422	0.05076	11	81	ADCYAP1R1,GABRB3,GABRE,SSTR5,GRIA3,GRIK2,GRIK3,GRIN2A,GRM1,GABBR2,GRIN3A
Pubmed	20201926	Human variation in alcohol response is influenced by variation in neuronal signaling genes.	Pubmed	2.852e-06	0.268	0.00422	0.05076	16	171	ACTA1,ACTN2,MYL5,CPLX1,SSTR5,TBCA,GRK5,TGFA,TGFB2,PDE4B,PDE4D,AKR1C1,PTPRR,PCDH15,RORB,PLCE1
Pubmed	8125298	Oligo-capping: a simple method to replace the cap structure of eukaryotic mRNAs with oligoribonucleotides.	Pubmed	2.874e-06	0.2701	0.00422	0.05076	76	1885	CNKSR1,TBC1D7,ATAT1,MFAP2,MGST3,PLA1A,FCGR3A,GTF2IRD2,FGFR4,VEGFD,SORBS2,FOSB,AQP4,MYL12A,TMBIM4,ZSCAN18,RACGAP1,OGDHL,KIF13A,GALNT15,ADAM18,NACA,NAP1L3,GATM,GCHFR,TSPAN9,BGN,PROM1,C1R,C9orf24,MICA,CAMK2B,PYROXD2,GRB7,SH2D2A,OMD,TGFBR3,ORC5,NUDT4,POLR1E,TMX4,HBA1,TNNI3,FRMD3,DHRS3,PDK4,PFDN1,CHGB,HMOX2,PPP1R15A,SERPINE2,HJV,MEAF6,LETMD1,GDF15,SPATA20,IGSF1,CTSG,IL6R,CYP11A1,LRRC49,RETSAT,TXNL4B,L…
Pubmed	19578796	Association of genetic variants with chronic kidney disease in individuals with different lipid profiles.	Pubmed	2.995e-06	0.2815	0.00433	0.05209	15	152	CCL11,SELE,APOE,CCND1,BLM,ABCC8,GNB3,NPPA,THBS4,PDE4D,HMOX1,CTSG,IL6,CYP2J2,PTGS2
Pubmed	22095278	RP58/ZNF238 directly modulates proneurogenic gene levels and is required for neuronal differentiation and brain expansion.	Pubmed	3.296e-06	0.3098	0.004694	0.05645	6	19	MAP2,NES,CUX2,CCN2,RELN,RORB
Pubmed	19056867	Large-scale proteomics and phosphoproteomics of urinary exosomes.	Pubmed	3.998e-06	0.3757	0.00545	0.06555	48	1017	RRAS,ADCY1,S100A6,FASN,ALDH3B1,RHCG,AOX1,APOE,DNPH1,CPNE5,SLC5A1,ARHGAP1,FRK,SLC15A2,BGN,PROM1,GPD1,CUX2,GRID1,CLIC6,GPRC5A,TGFBR3,THY1,SERINC5,HBB,PCBD1,CYSRT1,SERPINA5,DDAH2,DDAH1,SLC26A4,ABCB1,C16orf89,DUSP26,CLU,HSPA2,CRYM,IL1RN,CTSG,AIF1L,ITGB8,DDT,CFD,RENBP,LDHA,ACE2,VPS13D,ELANE
Pubmed	21411511	Rhythmic diurnal gene expression in human adipose tissue from individuals who are lean, overweight, and type 2 diabetic.	Pubmed	4.233e-06	0.3978	0.00545	0.06555	4	6	ARNTL,PER3,PER2,DBP
Pubmed	11090542	Multiple transcriptional domains, with distinct left and right components, in the atrial chambers of the developing heart.	Pubmed	4.233e-06	0.3978	0.00545	0.06555	4	6	ATP2A2,MYL2,NPPA,MYL7
Pubmed	11830573	Elevated transforming growth factor beta2 enhances apoptosis and contributes to abnormal outflow tract and aortic sac development in retinoic X receptor alpha knockout embryos.	Pubmed	4.233e-06	0.3978	0.00545	0.06555	4	6	MYL2,TGFB2,TGFB3,MYL7
Pubmed	24523933	Fc? receptor-mediated inflammation inhibits axon regeneration.	Pubmed	4.233e-06	0.3978	0.00545	0.06555	4	6	FCER1A,FCGR3A,B4GALNT1,C3
Pubmed	8093006	Interaction of the small interstitial proteoglycans biglycan, decorin and fibromodulin with transforming growth factor beta.	Pubmed	4.233e-06	0.3978	0.00545	0.06555	4	6	FMOD,BGN,TGFB2,TGFB3
Pubmed	15504324	Close homolog of L1 modulates area-specific neuronal positioning and dendrite orientation in the cerebral cortex.	Pubmed	4.233e-06	0.3978	0.00545	0.06555	4	6	MAP2,CHL1,NES,RELN
Pubmed	8288233	Linkage mapping of 40 randomly isolated liver cDNA clones in the mouse.	Pubmed	4.41e-06	0.4144	0.0056	0.06736	10	69	APOB,APOE,ASIP,C3,SLC38A3,NPPA,CLU,PLP1,PTGS1,PTGS2
Pubmed	22159717	The matrisome: in silico definition and in vivo characterization by proteomics of normal and tumor extracellular matrices.	Pubmed	4.475e-06	0.4205	0.005607	0.06745	15	157	F13A1,S100A13,MFAP2,MFAP4,ADAM19,BGN,THBS4,COL16A1,ADAMTSL5,HTRA1,ASPN,ELANE,LTBP1,LTBP2,LUM
Pubmed	14633990	NRSF regulates the fetal cardiac gene program and maintains normal cardiac structure and function.	Pubmed	4.698e-06	0.4415	0.005734	0.06897	5	12	ACTA1,ATP2A2,MYL2,NPPA,HCN4
Pubmed	25299188	BAF200 is required for heart morphogenesis and coronary artery development.	Pubmed	4.698e-06	0.4415	0.005734	0.06897	5	12	ACTN2,MYL2,LYVE1,TNNI3,MYL7
Pubmed	11076863	DNA cloning using in vitro site-specific recombination.	Pubmed	5.645e-06	0.5305	0.006751	0.0812	40	794	MORN4,ADAM11,KCNIP2,F5,TC2N,SYT13,LRRC8E,SORBS2,CCDC113,CSPG5,RACGAP1,GALNT15,CCND1,NDP,BGN,PROM1,PER2,SLC38A3,CAMK2B,DEPP1,SOCS3,GRM1,THY1,IL1RL1,HBB,ABCB1,PLA2G2A,IGSF1,PRLR,ABHD11,MAP3K7CL,AIF1L,GADD45A,LBH,HSD17B8,C1orf54,STMN1,FARP1,LPCAT3,STEAP3
Pubmed	26332085	Chronic Alcohol Exposure and the Circadian Clock Mutation Exert Tissue-Specific Effects on Gene Expression in Mouse Hippocampus, Liver, and Proximal Colon.	Pubmed	5.742e-06	0.5396	0.006751	0.0812	10	71	CCL2,ARNTL,CCND1,PER3,PER2,PDE4B,NOCT,IL6,DBP,PTGS2
Pubmed	16710414	The DNA sequence and biological annotation of human chromosome 1.	Pubmed	5.747e-06	0.5401	0.006751	0.0812	48	1031	LYPLAL1,IER5,EXTL1,FAAH,S100A6,S100A13,MFAP2,H2BC21,HOOK1,MGST3,C1orf105,LRRC7,SELE,ATP1A4,B3GALT2,CADM3,H2AW,PER3,MLLT11,FAM167B,NPPA,SH2D2A,TGFBR3,C1orf198,MAEL,TPM3,DHRS3,CIART,OPN3,HMGN2,CA14,TNFRSF4,PLA2G2A,BMP8A,MEAF6,COL16A1,ADAMTS4,G0S2,SYF2,CHD5,IL6R,PTGS2,KCNC4,SHE,C1orf54,STMN1,TTLL7,VPS13D
Pubmed	21900206	A directed protein interaction network for investigating intracellular signal transduction.	Pubmed	5.861e-06	0.5508	0.0068	0.08179	51	1123	RIN3,MAP4,CHDH,RPS10,MDK,CCDC85A,F13A1,CCL11,AMPH,SORBS2,CAMSAP3,FRZB,SNCA,FSCN1,GADD45G,GLRX,NGFR,WWC1,DDR1,ADAP1,PYROXD2,SOCS3,GRB7,SPACA9,ODC1,HAAO,HBA1,TNNT1,TPM3,DDAH2,PFDN1,HMGCL,CHGB,HMOX2,SEMA5B,PLA2G2A,FXYD3,SH3KBP1,CRYM,PHACTR3,MAP2K5,MASP1,AKR1C1,GADD45A,CDCA2,URB1,RAD9A,RAP1GAP,ATP5IF1,MYOZ3,STMN1
Pubmed	21832049	Interactions of pathological hallmark proteins: tubulin polymerization promoting protein/p25, beta-amyloid, and alpha-synuclein.	Pubmed	5.965e-06	0.5606	0.006837	0.08223	75	1891	MAP2,ZRSR2,TBC1D7,RPS10,TIGD1,ETV4,ATAT1,KLHL32,PRR16,PLA1A,FCGR3A,C1orf105,COA5,FGF12,FHL2,FOXS1,MED30,PHLDA1,SGCG,CHCHD6,C7orf50,VAT1L,ZNF365,ZSCAN18,DLK2,RASL11B,SNCA,MCTP2,IFI6,TRAPPC2L,SMTNL2,MYL5,STK26,TMEM126B,NDP,MSTN,GADD45G,DMAC1,SERTM1,TCEA2,TRIM41,SOCS3,TPPP,CDPF1,HAVCR2,ZDHHC23,P2RY2,P2RX6,IL1RL1,MTURN,PDE4D,CIART,VSIG4,HMGB2,HMGCS2,CHGB,MYOZ1,C11orf71,HSPA2,RAB26,LETMD1,ETNPPL,SYF2,…
Pubmed	21289070	DOT1L regulates dystrophin expression and is critical for cardiac function.	Pubmed	6.335e-06	0.5953	0.007004	0.08424	6	21	ACTA1,ACTN2,SGCD,SGCG,MYH6,NPPA
Pubmed	23063798	Myocardial Mycn is essential for mouse ventricular wall morphogenesis.	Pubmed	6.335e-06	0.5953	0.007004	0.08424	6	21	ACTA1,MYH6,MYL2,CCND1,TNNI3,MYL7
Pubmed	25382142	Mice with megalencephalic leukoencephalopathy with cysts: a developmental angle.	Pubmed	6.335e-06	0.5953	0.007004	0.08424	6	21	MBP,AQP4,NES,PDGFRA,HEPACAM,PLP1
Pubmed	19263529	Genetic risk factors in recurrent venous thromboembolism: A multilocus, population-based, prospective approach.	Pubmed	6.433e-06	0.6046	0.00703	0.08456	9	57	F5,CCL11,SELE,APOB,APOE,C3,GNB3,NPPA,IL6
Pubmed	20503287	Interleukin-9 polymorphism in infants with respiratory syncytial virus infection: an opposite effect in boys and girls.	Pubmed	6.792e-06	0.6383	0.007337	0.08825	17	204	FCER1A,CXCL9,CCL2,CCL11,SOCS2,NGFR,C3,SOCS3,CXCL1,TGFB2,HAVCR2,IL1RN,IL6,IL6R,IL10RA,PTGS2,JAK2
Pubmed	19258923	Genetic susceptibility to respiratory syncytial virus bronchiolitis in preterm children is associated with airway remodeling genes and innate immune genes.	Pubmed	7.248e-06	0.6812	0.007734	0.09303	17	205	FCER1A,CXCL9,CCL2,CCL11,SOCS2,NGFR,C3,SOCS3,CXCL1,TGFB2,HAVCR2,IL1RN,IL6,IL6R,IL10RA,PTGS2,JAK2
Pubmed	23364326	The transcription factor Otx2 regulates choroid plexus development and function.	Pubmed	7.379e-06	0.6935	0.007734	0.09303	7	32	ETV4,FGF12,CCND1,PROM1,SHISA2,PENK,RELN
Pubmed	17703412	Genetic susceptibility to respiratory syncytial virus bronchiolitis is predominantly associated with innate immune genes.	Pubmed	8.244e-06	0.7747	0.007734	0.09303	17	207	FCER1A,CXCL9,CCL2,CCL11,SOCS2,NGFR,C3,SOCS3,CXCL1,TGFB2,HAVCR2,IL1RN,IL6,IL6R,IL10RA,PTGS2,JAK2
Pubmed	20673868	A genetic association study of maternal and fetal candidate genes that predispose to preterm prelabor rupture of membranes (PROM).	Pubmed	8.418e-06	0.7911	0.007734	0.09303	16	186	F5,F13A1,CCL2,VEGFD,SELE,APOB,APOE,GNB3,NPPA,THBS4,IL1RN,IL6,IL6R,IL10RA,PTGS1,PTGS2
Pubmed	20877624	Genetic variants in nuclear-encoded mitochondrial genes influence AIDS progression.	Pubmed	8.504e-06	0.7992	0.007734	0.09303	44	926	ACACB,CHDH,SLC25A34,ACYP2,FASN,UQCC2,EFHD1,OGDHL,MPC1,UQCRQ,ATP5ME,GATM,BCL2,ADHFE1,RAB24,GLRX,DEPP1,ISCU,COX7A2L,COX14,SDSL,DDAH1,HK3,PDK4,HMGCL,HMGCS2,DUSP26,MRPL57,LETMD1,COX7A2,CPT1A,MRPL40,ABHD11,CYP11A1,DELE1,EXOG,HSD17B8,ATP5IF1,ARMC4,LDHA,AASS,TMEM143,MRPL46,SDHAF4
Pubmed	7873878	Intracisternal A-type particle elements as genetic markers: detection by repeat element viral element amplified locus-PCR.	Pubmed	8.539e-06	0.8025	0.007734	0.09303	6	22	FCER1A,ASIP,GPD1,NPPA,ODC1,HMGCL
Pubmed	15843407	T-box genes coordinate regional rates of proliferation and regional specification during cardiogenesis.	Pubmed	8.539e-06	0.8025	0.007734	0.09303	6	22	MYL2,BMP5,BMP7,NPPA,MYL7,TBX20
Pubmed	14718574	The human plasma proteome: a nonredundant list developed by combination of four separate sources.	Pubmed	8.846e-06	0.8313	0.007734	0.09303	15	166	ETV4,F5,SAA1,APOB,APOE,FCN3,ARHGAP1,AZGP1,C1R,NPPA,SERPINA5,CLU,IL6,IL6R,LUM
Pubmed	24859004	The ability of inner-cell-mass cells to self-renew as embryonic stem cells is acquired following epiblast specification.	Pubmed	8.987e-06	0.8446	0.007734	0.09303	11	91	FGF10,FGFR4,BMP5,SOCS3,TGFB2,LEFTY2,TGFBR3,PDGFRA,IL6,JAK2,LEF1
Pubmed	20452482	Identification of fetal and maternal single nucleotide polymorphisms in candidate genes that predispose to spontaneous preterm labor with intact membranes.	Pubmed	9.009e-06	0.8467	0.007734	0.09303	16	187	F5,F13A1,CCL2,VEGFD,SELE,APOB,APOE,GNB3,NPPA,THBS4,IL1RN,IL6,IL6R,IL10RA,PTGS1,PTGS2
Pubmed	19259132	Multilocus analysis of age-related macular degeneration.	Pubmed	9.694e-06	0.9111	0.007734	0.09303	4	7	APOE,ARMS2,C3,HTRA1
Pubmed	10930463	Specific sequence motif of 8-Cys repeats of TGF-beta binding proteins, LTBPs, creates a hydrophobic interaction surface for binding of small latent TGF-beta.	Pubmed	9.694e-06	0.9111	0.007734	0.09303	4	7	TGFB2,TGFB3,LTBP1,LTBP2
Pubmed	20381870	Progression of geographic atrophy and genotype in age-related macular degeneration.	Pubmed	9.694e-06	0.9111	0.007734	0.09303	4	7	APOE,ARMS2,C3,HTRA1
Pubmed	19086053	Identification of new putative susceptibility genes for several psychiatric disorders by association analysis of regulatory and non-synonymous SNPs of 306 genes involved in neurotransmission and neurodevelopment.	Pubmed	9.698e-06	0.9114	0.007734	0.09303	21	301	ACTN2,ADCYAP1R1,FAAH,SLC1A7,GABRB3,GABRE,NGFR,GNB3,NPPA,NPR3,GRIA3,GRIK2,GRIK3,GRIN2A,CNTN3,PENK,ABCB1,GABBR2,PRLR,RELN,GRIN3A
Pubmed	12082592	Multi-locus interactions predict risk for post-PTCA restenosis: an approach to the genetic analysis of common complex disease.	Pubmed	9.932e-06	0.9334	0.007734	0.09303	9	60	F5,CCL11,SELE,APOB,APOE,GNB3,NPPA,IL1RN,IL6
Pubmed	15902305	Morphogenesis of the right ventricle requires myocardial expression of Gata4.	Pubmed	1.132e-05	1	0.007734	0.09303	6	23	MYH6,MYL2,CCND1,NPPA,MYL7,GATA5
Pubmed	19238444	The genomic basis of cerebral palsy: a HuGE systematic literature review.	Pubmed	1.132e-05	1	0.007734	0.09303	7	34	F5,SELE,APOE,GNB3,NPPA,IL6,PTGS2
Pubmed	26120030	Foxf2 Is Required for Brain Pericyte Differentiation and Development and Maintenance of the Blood-Brain Barrier.	Pubmed	1.132e-05	1	0.007734	0.09303	7	34	FOXS1,AQP4,TGFB2,TGFB3,TGFBR3,ITGB8,LEF1
Pubmed	21703224	T-quaternary structure of oxy human adult hemoglobin in the presence of two allosteric effectors, L35 and IHP.	Pubmed	1.292e-05	1	0.007734	0.09303	3	3	HBA1,HBA2,HBB
Pubmed	21843656	Gadd45a, Gadd45b and Gadd45g expression during mouse embryonic development.	Pubmed	1.292e-05	1	0.007734	0.09303	3	3	GADD45B,GADD45G,GADD45A
Pubmed	15585880	Nonredundant function of phosphodiesterases 4D and 4B in neutrophil recruitment to the site of inflammation.	Pubmed	1.292e-05	1	0.007734	0.09303	3	3	PDE4A,PDE4B,PDE4D
Pubmed	24074341	Comparative haematological parameters of HbAA and HbAS genotype children infected with Plasmodium falciparum malaria in Yemen.	Pubmed	1.292e-05	1	0.007734	0.09303	3	3	HBA1,HBA2,HBB
Pubmed	2113569	Radial component of CNS myelin: junctional subunit structure and supramolecular assembly.	Pubmed	1.292e-05	1	0.007734	0.09303	3	3	MBP,PLP1,EDA
Pubmed	30343691	Pro-inflammatory cytokines IL-6 and CCL2 suppress expression of circadian gene Period2 in mammary epithelial cells.	Pubmed	1.292e-05	1	0.007734	0.09303	3	3	CCL2,PER2,IL6
Pubmed	18276775	Simvastatin protects against amyloid beta and HIV-1 Tat-induced promoter activities of inflammatory genes in brain endothelial cells.	Pubmed	1.292e-05	1	0.007734	0.09303	3	3	CCL2,SELE,IL6
Pubmed	9202403	The last proline of Box 1 is essential for association with JAK2 and functional activation of the prolactin receptor.	Pubmed	1.292e-05	1	0.007734	0.09303	3	3	SOCS2,PRLR,JAK2
Pubmed	14701858	Rescue of female infertility from the loss of cyclooxygenase-2 by compensatory up-regulation of cyclooxygenase-1 is a function of genetic makeup.	Pubmed	1.292e-05	1	0.007734	0.09303	3	3	PLA2G2A,PTGS1,PTGS2
Pubmed	24635037	Capturing the hemoglobin allosteric transition in a single crystal form.	Pubmed	1.292e-05	1	0.007734	0.09303	3	3	HBA1,HBA2,HBB
Pubmed	16034090	Specific role of phosphodiesterase 4B in lipopolysaccharide-induced signaling in mouse macrophages.	Pubmed	1.292e-05	1	0.007734	0.09303	3	3	PDE4A,PDE4B,PDE4D
Pubmed	1115799	Two new hemoglobins. Hemoglobin Alabama (beta39(C5)Gln leads to Lys) and hemoglobin Montgomery (alpha 48(CD 6) Leu leads to Arg).	Pubmed	1.292e-05	1	0.007734	0.09303	3	3	HBA1,HBA2,HBB
Pubmed	10594919	Neurosteroid progesterone is up-regulated in the brain of jimpy and shiverer mice.	Pubmed	1.292e-05	1	0.007734	0.09303	3	3	MBP,PLP1,EDA
Pubmed	11724557	Control of heme reactivity by diffusion: structural basis and functional characterization in hemoglobin mutants.	Pubmed	1.292e-05	1	0.007734	0.09303	3	3	HBA1,HBA2,HBB
Pubmed	18508768	Critical role of PDE4D in beta2-adrenoceptor-dependent cAMP signaling in mouse embryonic fibroblasts.	Pubmed	1.292e-05	1	0.007734	0.09303	3	3	PDE4A,PDE4B,PDE4D
Pubmed	24555506	The upstream conserved regions (UCRs) mediate homo- and hetero-oligomerization of type 4 cyclic nucleotide phosphodiesterases (PDE4s).	Pubmed	1.292e-05	1	0.007734	0.09303	3	3	PDE4A,PDE4B,PDE4D
Pubmed	29752408	Interleukin-6-mediated trans-signaling inhibits transforming growth factor-? signaling in trabecular meshwork cells.	Pubmed	1.292e-05	1	0.007734	0.09303	3	3	TGFB2,IL6,IL6R
Pubmed	9830011	Crystal structure of deoxy-human hemoglobin beta6 Glu --> Trp. Implications for the structure and formation of the sickle cell fiber.	Pubmed	1.292e-05	1	0.007734	0.09303	3	3	HBA1,HBA2,HBB
Pubmed	25345762	A case-control study on proinflammatory genetic polymorphisms on sudden sensorineural hearing loss.	Pubmed	1.292e-05	1	0.007734	0.09303	3	3	CCL2,SELE,IL6
Pubmed	18568776	Expression of multidrug resistance genes in normal and cancer stem cells.	Pubmed	1.292e-05	1	0.007734	0.09303	3	3	BCL2,PROM1,ABCB1
Pubmed	23948778	Prolactin promotes normal liver growth, survival, and regeneration in rodents: effects on hepatic IL-6, suppressor of cytokine signaling-3, and angiogenesis.	Pubmed	1.292e-05	1	0.007734	0.09303	3	3	SOCS3,IL6,PRLR
Pubmed	23372705	The transcription factor Runx2 is under circadian control in the suprachiasmatic nucleus and functions in the control of rhythmic behavior.	Pubmed	1.292e-05	1	0.007734	0.09303	3	3	ARNTL,PER2,RUNX2
Pubmed	6644819	Structure of human oxyhaemoglobin at 2.1 A resolution.	Pubmed	1.292e-05	1	0.007734	0.09303	3	3	HBA1,HBA2,HBB
Pubmed	23606611	Sex difference in daily rhythms of clock gene expression in the aged human cerebral cortex.	Pubmed	1.292e-05	1	0.007734	0.09303	3	3	ARNTL,PER3,PER2
Pubmed	20621720	Autocrine IL-6 regulates GRO-alpha production in thymic epithelial cells.	Pubmed	1.292e-05	1	0.007734	0.09303	3	3	CXCL1,IL6,JAK2
Pubmed	16849634	GRB14, GPD1, and GDF8 as potential network collaborators in weight loss-induced improvements in insulin action in human skeletal muscle.	Pubmed	1.292e-05	1	0.007734	0.09303	3	3	MSTN,GPD1,GRB14
Pubmed	27377386	Visualizing the Bohr effect in hemoglobin: neutron structure of equine cyanomethemoglobin in the R state and comparison with human deoxyhemoglobin in the T state.	Pubmed	1.292e-05	1	0.007734	0.09303	3	3	HBA1,HBA2,HBB
Pubmed	22541814	Thrombin induces heme oxygenase-1 expression in human synovial fibroblasts through protease-activated receptor signaling pathways.	Pubmed	1.292e-05	1	0.007734	0.09303	3	3	F2R,F2RL2,HMOX1
Pubmed	23349856	Characterization of adult ?- and ?-globin elevated by hydrogen peroxide in cervical cancer cells that play a cytoprotective role against oxidative insults.	Pubmed	1.292e-05	1	0.007734	0.09303	3	3	HBA1,HBA2,HBB
Pubmed	10213096	Cyclic AMP phosphodiesterases are localized in regions of the mouse brain associated with reinforcement, movement, and affect.	Pubmed	1.292e-05	1	0.007734	0.09303	3	3	PDE4A,PDE4B,PDE4D
Pubmed	10930828	Genetically crosslinked hemoglobin: a structural study.	Pubmed	1.292e-05	1	0.007734	0.09303	3	3	HBA1,HBA2,HBB
Pubmed	9441940	The use of electron tomography for structural analysis of disordered protein arrays.	Pubmed	1.292e-05	1	0.007734	0.09303	3	3	HBA1,HBA2,HBB
Pubmed	25238043	The correlation of ?-globin gene mutations and the XmnI polymorphism with clinical severity of Hb E/?-thalassemia.	Pubmed	1.292e-05	1	0.007734	0.09303	3	3	HBA1,HBA2,HBB
Pubmed	10390349	Modulation of ligand binding in engineered human hemoglobin distal pocket.	Pubmed	1.292e-05	1	0.007734	0.09303	3	3	HBA1,HBA2,HBB
Pubmed	19384922	ABCB1 is predominantly expressed in human fetal neural stem/progenitor cells at an early development stage.	Pubmed	1.292e-05	1	0.007734	0.09303	3	3	NES,PROM1,ABCB1
Pubmed	9894000	Structural and functional properties of human hemoglobins reassembled after synthesis in Escherichia coli.	Pubmed	1.292e-05	1	0.007734	0.09303	3	3	HBA1,HBA2,HBB
Pubmed	12372778	Three GADD45 isoforms contribute to hypertonic stress phenotype of murine renal inner medullary cells.	Pubmed	1.292e-05	1	0.007734	0.09303	3	3	GADD45B,GADD45G,GADD45A
Pubmed	1552945	A human recombinant haemoglobin designed for use as a blood substitute.	Pubmed	1.292e-05	1	0.007734	0.09303	3	3	HBA1,HBA2,HBB
Pubmed	18517031	Inter-individual differences in habitual sleep timing and entrained phase of endogenous circadian rhythms of BMAL1, PER2 and PER3 mRNA in human leukocytes.	Pubmed	1.292e-05	1	0.007734	0.09303	3	3	ARNTL,PER3,PER2
Pubmed	22183073	Relationship between maternal hemoglobin concentration and neonatal birth weight.	Pubmed	1.292e-05	1	0.007734	0.09303	3	3	HBA1,HBA2,HBB
Pubmed	10651981	Possible involvement of enhanced prostaglandin E2 production in the photosensitivity in xeroderma pigmentosum group A model mice.	Pubmed	1.292e-05	1	0.007734	0.09303	3	3	XPA,PTGS1,PTGS2
Pubmed	23095280	Myosin light chain phosphorylation is critical for adaptation to cardiac stress.	Pubmed	1.292e-05	1	0.007734	0.09303	3	3	MYL2,MYLK3,TMEM163
Pubmed	29523263	Aberrant pro-atrial natriuretic peptide/corin/natriuretic peptide receptor signaling is present in maternal vascular endothelium in preeclampsia.	Pubmed	1.292e-05	1	0.007734	0.09303	3	3	CORIN,NPPA,NPR3
Pubmed	15835899	Crystallographic evidence for a new ensemble of ligand-induced allosteric transitions in hemoglobin: the T-to-T(high) quaternary transitions.	Pubmed	1.292e-05	1	0.007734	0.09303	3	3	HBA1,HBA2,HBB
Pubmed	25757568	Multitarget fatty acid amide hydrolase/cyclooxygenase blockade suppresses intestinal inflammation and protects against nonsteroidal anti-inflammatory drug-dependent gastrointestinal damage.	Pubmed	1.292e-05	1	0.007734	0.09303	3	3	FAAH,PTGS1,PTGS2
Pubmed	1512262	A third quaternary structure of human hemoglobin A at 1.7-A resolution.	Pubmed	1.292e-05	1	0.007734	0.09303	3	3	HBA1,HBA2,HBB
Pubmed	19246912	No genetic association between polymorphisms of heme oxygenase 1 and 2 and Alzheimer's disease in a Japanese population.	Pubmed	1.292e-05	1	0.007734	0.09303	3	3	APOE,HMOX1,HMOX2
Pubmed	19843387	Alpha globin gene numbers: an important modifier of HbE/beta thalassemia.	Pubmed	1.292e-05	1	0.007734	0.09303	3	3	HBA1,HBA2,HBB
Pubmed	15262964	Gadd45 proteins induce G2/M arrest and modulate apoptosis in kidney cells exposed to hyperosmotic stress.	Pubmed	1.292e-05	1	0.007734	0.09303	3	3	GADD45B,GADD45G,GADD45A
Pubmed	17404263	Differential expression and function of phosphodiesterase 4 (PDE4) subtypes in human primary CD4+ T cells: predominant role of PDE4D.	Pubmed	1.292e-05	1	0.007734	0.09303	3	3	PDE4A,PDE4B,PDE4D
Pubmed	24104471	Gadd45 in modulation of solid tumors and leukemia.	Pubmed	1.292e-05	1	0.007734	0.09303	3	3	GADD45B,GADD45G,GADD45A
Pubmed	20565961	Tgfbeta2 and 3 are coexpressed with their extracellular regulator Ltbp1 in the early limb bud and modulate mesodermal outgrowth and BMP signaling in chicken embryos.	Pubmed	1.292e-05	1	0.007734	0.09303	3	3	TGFB2,TGFB3,LTBP1
Pubmed	20628624	Evaluation of candidate stromal epithelial cross-talk genes identifies association between risk of serous ovarian cancer and TERT, a cancer susceptibility "hot-spot".	Pubmed	1.356e-05	1	0.008067	0.09703	15	172	ERBB3,MFAP4,CXCL9,CCL11,IFI6,C3,CXCL1,TGFB2,TGFB3,THBS4,ISG15,CCN2,IL6,PTGS1,PTGS2
Pubmed	19453261	High-density association study of 383 candidate genes for volumetric BMD at the femoral neck and lumbar spine among older men.	Pubmed	1.409e-05	1	0.008329	0.1002	24	383	EXT1,GPNMB,SFRP4,FOSB,FRZB,CCND1,DLK1,BCL2,MSTN,BGN,BMP7,RUNX2,TGFB2,TGFB3,TGFBR3,CHRDL2,CCN2,IL1RN,IL6,IL6R,CYP11A1,LTBP1,LTBP2,LEF1
Pubmed	25037231	Extracellular matrix signatures of human primary metastatic colon cancers and their metastases to liver.	Pubmed	1.515e-05	1	0.008901	0.1071	14	153	F13A1,S100A6,MFAP2,MFAP4,AEBP1,BGN,CBLN1,COL9A1,COL16A1,CTSG,ASPN,ELANE,LTBP1,LUM
Pubmed	16985003	Large-scale analysis of ion channel gene expression in the mouse heart during perinatal development.	Pubmed	1.623e-05	1	0.009401	0.1131	13	134	KCNIP2,ATP2A2,ABCC8,KCNMB4,P2RX1,P2RX6,KCNC4,KCNJ4,KCNJ8,KCNK3,KCNMB1,KCNN2,HCN4
Pubmed	19884258	Elucidation of the transcription network governing mammalian sex determination by exploiting strain-specific susceptibility to sex reversal.	Pubmed	1.632e-05	1	0.009401	0.1131	8	49	EREG,SMOC2,SOCS2,CBLN1,TFRC,TPD52L1,SERPINE2,RTN4RL1
Pubmed	20485444	Common polymorphisms in ITGA2, PON1 and THBS2 are associated with coronary atherosclerosis in a candidate gene association study of the Chinese Han population.	Pubmed	1.636e-05	1	0.009401	0.1131	12	115	CXCL9,CCL2,SELE,TGFB2,TGFB3,THBS4,PDGFRA,HMOX1,HMOX2,TNFRSF4,IL1RN,IL6
Pubmed	27559042	Glycoproteomics Reveals Decorin Peptides With Anti-Myostatin Activity in Human Atrial Fibrillation.	Pubmed	1.665e-05	1	0.009401	0.1131	11	97	FMOD,APOE,AZGP1,MSTN,BGN,NPPA,CLU,CTSG,ASPN,LTBP2,LUM
Pubmed	9136932	GATA4 transcription factor is required for ventral morphogenesis and heart tube formation.	Pubmed	1.681e-05	1	0.009401	0.1131	5	15	MYH6,MYL2,NPPA,TNNI3,MYL7
Pubmed	28732025	Hand factor ablation causes defective left ventricular chamber development and compromised adult cardiac function.	Pubmed	1.681e-05	1	0.009401	0.1131	5	15	MYL2,NPPA,HEY2,TBX20,IRX2
Pubmed	18215621	SOX5 controls the sequential generation of distinct corticofugal neuron subtypes.	Pubmed	1.681e-05	1	0.009401	0.1131	5	15	CUX2,CRYM,CCN2,RELN,RORB
Pubmed	17273929	Mapping of QTLs for oral alcohol self-administration in B6.C and B6.I quasi-congenic RQI strains.	Pubmed	1.681e-05	1	0.009401	0.1131	5	15	LRRTM4,STXBP6,GNB3,GPR27,KCNJ8
Pubmed	19131662	A meta-analysis of candidate gene polymorphisms and ischemic stroke in 6 study populations: association of lymphotoxin-alpha in nonhypertensive patients.	Pubmed	1.703e-05	1	0.00947	0.1139	9	64	F5,CCL11,SELE,APOB,APOE,C3,GNB3,NPPA,IL6
Pubmed	11125038	Database resources of the National Center for Biotechnology Information.	Pubmed	1.77e-05	1	0.009784	0.1177	64	1587	MNS1,LYPLAL1,TBC1D7,SYNPO2L,SNAPC5,SNAI3,CCDC85A,IFT43,CXCL9,NCEH1,C1QTNF3,KLHDC8B,FOXS1,SFRP4,CAMSAP3,PLEKHA4,UQCC2,ZNF365,SLC1A7,EFHC2,ARHGAP1,ARRDC2,SAMD4A,SLC16A10,CADM3,GADD45B,KIF1A,NAP1L3,C12orf57,PRRT3,C9orf24,NKG7,ADAP1,SOCS3,TFRC,PKIG,NUDT4,SH3D19,MAEL,SERINC5,FRMD3,SDSL,CA14,HEPACAM,ITGBL1,TRAPPC6A,LETMD1,CHRDL2,PCDH20,CLIP3,ARHGAP24,LRRC49,STEAP2,RETSAT,MYLK3,TMEM163,EXOG,METTL7B,RALG…
Pubmed	23898208	Induction of IL-17 and nonclassical T-cell activation by HIV-Tat protein.	Pubmed	1.836e-05	1	0.01007	0.1211	11	98	SAMD12,NCEH1,GPNMB,FSCN1,SOCS2,SOCS3,CXCL1,IL6,AK5,LONRF3,GPA33
Pubmed	20881960	Hundreds of variants clustered in genomic loci and biological pathways affect human height.	Pubmed	1.843e-05	1	0.01007	0.1211	16	198	LYPLAL1,VGLL2,MFAP2,FGFR4,LOC101928731,SOCS2,MICA,NPR3,TGFB2,SERPINE2,JMJD4,ZFAS1,GFPT2,PDE11A,LTBP1,LTBP2
Pubmed	17202846	Association of common promoter polymorphisms of MCP1 with hepatitis B virus clearance.	Pubmed	1.903e-05	1	0.01019	0.1226	4	8	CCL2,THBS4,ABCB1,PTGS2
Pubmed	11118473	Sensitive nonradioactive detection of mRNA in tissue sections: novel application of the whole-mount in situ hybridization protocol.	Pubmed	1.903e-05	1	0.01019	0.1226	4	8	MYL2,NPPA,IRX1,IRX2
Pubmed	12432070	Essential role of citron kinase in cytokinesis of spermatogenic precursors.	Pubmed	1.903e-05	1	0.01019	0.1226	4	8	MYBL1,CCND1,DMC1,CLGN
Pubmed	26100917	Endocardial Brg1 disruption illustrates the developmental origins of semilunar valve disease.	Pubmed	1.909e-05	1	0.01019	0.1226	6	25	ADAMTS5,TGFB2,ENPP2,CTHRC1,GATA5,PLCE1
Pubmed	18614564	Proteomics analysis identifies phosphorylation-dependent alpha-synuclein protein interactions.	Pubmed	2.029e-05	1	0.01077	0.1295	14	157	MAP2,MAP4,RPS10,MGST3,UQCRQ,SNCA,BRSK1,CAMK2B,TPPP,THY1,COX7A2L,COX7A2,NDUFA11,LSAMP
Pubmed	24680892	AcvR1-mediated BMP signaling in second heart field is required for arterial pole development: implications for myocardial differentiation and regional identity.	Pubmed	2.04e-05	1	0.01077	0.1295	7	37	ETV4,FGF10,MYH6,NPPA,TGFB2,MYL7,TBX20
Pubmed	22967998	Placental PPAR? regulates spatiotemporally diverse genes and a unique metabolic network.	Pubmed	2.058e-05	1	0.0108	0.13	13	137	VGLL3,F13A1,NT5C2,TGFB3,CDS1,ABCB1,CLU,SGPP2,PRLR,TSC22D3,RALGPS2,ANGPTL4,ST8SIA2
Pubmed	19794400	Intact lipid rafts regulate HIV-1 Tat protein-induced activation of the Rho signaling and upregulation of P-glycoprotein in brain endothelial cells.	Pubmed	2.397e-05	1	0.01238	0.1489	5	16	MYL12A,MYL2,MYL5,ABCB1,MYL7
Pubmed	20161734	Causal relationship of susceptibility genes to ischemic stroke: comparison to ischemic heart disease and biochemical determinants.	Pubmed	2.397e-05	1	0.01238	0.1489	5	16	F5,F13A1,APOE,PDE4D,IL6
Pubmed	22158708	Polycomb repressive complex 2 regulates normal development of the mouse heart.	Pubmed	2.397e-05	1	0.01238	0.1489	5	16	ATP2A2,NPPA,TNNI3,MYL7,HCN4
Pubmed	27133129	Chronic Activation of ?2 AMPK Induces Obesity and Reduces ? Cell Function.	Pubmed	2.433e-05	1	0.0125	0.1503	6	26	FASN,MGST1,HK3,PDGFRA,CPT1A,LDHA
Pubmed	30201295	Myocardial ?-Catenin-BMP2 signaling promotes mesenchymal cell proliferation during endocardial cushion formation.	Pubmed	2.45e-05	1	0.01251	0.1505	7	38	CCND1,BMP5,BMP7,TGFB2,TGFB3,HEY2,TBX20
Pubmed	16537572	Nell1-deficient mice have reduced expression of extracellular matrix proteins causing cranial and vertebral defects.	Pubmed	2.661e-05	1	0.01352	0.1626	16	204	MDK,AEBP1,FGFR4,CSPG5,SPOCK1,FRS3,BGN,BMP5,BMP7,ADAMTS5,RUNX2,THBS4,SEMA5B,COL9A1,COL16A1,RELN
Pubmed	19789190	A gene-based risk score for lung cancer susceptibility in smokers and ex-smokers.	Pubmed	2.734e-05	1	0.01382	0.1662	12	121	CCND1,BCL2,SULT1A1,HAVCR2,ABCB1,SERPINE2,XPA,CCN2,IL6,PTGS2,GADD45A,ELANE
Pubmed	17213182	Identification of genes related to Parkinson's disease using expressed sequence tags.	Pubmed	2.903e-05	1	0.01459	0.1755	10	85	AQP4,LOC100506725,MICA,GRIK3,TFRC,HAAO,MTURN,CADPS2,DBP,RERGL
Pubmed	19334288	Three-dimensional visualization of testis cord morphogenesis, a novel tubulogenic mechanism in development.	Pubmed	3.008e-05	1	0.01504	0.1808	15	184	MFAP2,MFAP4,ADAM19,SMOC2,GPD1,ADAMTS5,PCNT,PDGFRA,COL9A1,NDUFA11,HTRA1,DDT,KCNJ8,ACE2,LTBP1
Pubmed	18448089	Lamination of the cerebral cortex is disturbed in Gli3 mutant mice.	Pubmed	3.067e-05	1	0.01525	0.1834	6	27	MAP2,NES,CUX2,TGFA,RELN,RORB
Pubmed	22516433	Proteomic analysis of microvesicles from plasma of healthy donors reveals high individual variability.	Pubmed	3.244e-05	1	0.01604	0.193	13	143	ACTA1,F13A1,APOE,FCN3,C1R,C3,TFRC,HBA1,HBA2,HBB,CLU,HSPA2,ANGPTL4
Pubmed	10588868	A role for p75 neurotrophin receptor in the control of hair follicle morphogenesis.	Pubmed	3.331e-05	1	0.0162	0.1949	5	17	FGF7,BCL2,NGFR,TGFB2,UCHL1
Pubmed	22461901	Bmp7 regulates the survival, proliferation, and neurogenic properties of neural progenitor cells during corticogenesis in the mouse.	Pubmed	3.331e-05	1	0.0162	0.1949	5	17	MAP2,NES,BMP5,BMP7,RELN
Pubmed	10521784	Submandibular gland morphogenesis: stage-specific expression of TGF-alpha/EGF, IGF, TGF-beta, TNF, and IL-6 signal transduction in normal embryonic mice and the phenotypic effects of TGF-beta2, TGF-beta3, and EGF-r null mutations.	Pubmed	3.331e-05	1	0.0162	0.1949	5	17	TGFA,TGFB2,TGFB3,IL6,IL6R
Pubmed	11520674	Gene and cluster-specific expression of the Iroquois family members during mouse development.	Pubmed	3.362e-05	1	0.0162	0.1949	4	9	ATP2A2,IRX6,IRX1,IRX2
Pubmed	11164852	Molecular characterization of the ventricular conduction system in the developing mouse heart: topographical correlation in normal and congenitally malformed hearts.	Pubmed	3.362e-05	1	0.0162	0.1949	4	9	MYH6,MYL2,TNNI3,MYL7
Pubmed	15342483	TGFbeta superfamily signals are required for morphogenesis of the kidney mesenchyme progenitor population.	Pubmed	3.398e-05	1	0.01629	0.196	8	54	MSTN,BMP5,BMP7,TGFB2,TGFB3,TGFBR3,GDF6,GDF15
Pubmed	22560297	Congenital asplenia in mice and humans with mutations in a Pbx/Nkx2-5/p15 module.	Pubmed	3.534e-05	1	0.01686	0.2028	14	165	CCND1,BMP5,BMP7,CAMK2B,TGFB2,TGFB3,TGFBR3,GDF6,IL6,GADD45A,TMEM163,RAD9A,LTBP1,LTBP2
Pubmed	28159809	Cardiac Med1 deletion promotes early lethality, cardiac remodeling, and transcriptional reprogramming.	Pubmed	3.826e-05	1	0.01816	0.2184	6	28	MYH6,NPPA,TGFB2,TGFB3,CPT1A,CCN2
Pubmed	15146195	Time-controlled transcardiac perfusion cross-linking for the study of protein interactions in complex tissues.	Pubmed	4.108e-05	1	0.01856	0.2233	7	41	MBP,APOE,CADM3,CLU,PLP1,NECTIN1,LSAMP
Pubmed	16381901	The LIFEdb database in 2006.	Pubmed	4.415e-05	1	0.01856	0.2233	35	720	MORN4,KCNIP2,TC2N,SYT13,LRRC8E,SORBS2,CCDC113,RACGAP1,GALNT15,CCND1,NDP,BGN,PROM1,SLC38A3,CAMK2B,DEPP1,SOCS3,THY1,IL1RL1,HBB,ABCB1,PLA2G2A,IGSF1,PRLR,ABHD11,MAP3K7CL,AIF1L,GADD45A,LBH,HSD17B8,C1orf54,STMN1,FARP1,LPCAT3,STEAP3
Pubmed	20637190	O-fucosylation of thrombospondin type 1 repeats restricts epithelial to mesenchymal transition (EMT) and maintains epiblast pluripotency during mouse gastrulation.	Pubmed	4.459e-05	1	0.01856	0.2233	9	72	ADAMTS15,C6,ADAMTS5,LEFTY2,ADAMTS7,SEMA5B,ADAMTS4,ADAMTSL5,CCN2
Pubmed	27019112	Genetic lineage tracing identifies endocardial origin of liver vasculature.	Pubmed	4.524e-05	1	0.01856	0.2233	5	18	NPR3,TNNI3,PDGFRA,TMEM163,KRT19
Pubmed	15489336	From ORFeome to biology: a functional genomics pipeline.	Pubmed	4.666e-05	1	0.01856	0.2233	35	722	MORN4,KCNIP2,TC2N,SYT13,LRRC8E,SORBS2,CCDC113,RACGAP1,GALNT15,CCND1,NDP,BGN,PROM1,SLC38A3,CAMK2B,DEPP1,SOCS3,THY1,IL1RL1,HBB,ABCB1,PLA2G2A,IGSF1,PRLR,ABHD11,MAP3K7CL,AIF1L,GADD45A,LBH,HSD17B8,C1orf54,STMN1,FARP1,LPCAT3,STEAP3
Pubmed	19295509	Genetic and clinical predictors of sexual dysfunction in citalopram-treated depressed patients.	Pubmed	4.958e-05	1	0.01856	0.2233	3	4	GRIA3,GRIK2,GRIN3A
Pubmed	10508692	The ins and outs of circadian timekeeping.	Pubmed	4.958e-05	1	0.01856	0.2233	3	4	PER3,PER2,DBP
Pubmed	27590203	FGF and EDA pathways control initiation and branching of distinct subsets of developing nasal glands.	Pubmed	4.958e-05	1	0.01856	0.2233	3	4	FGF7,FGF10,EDA
Pubmed	23082219	Regulated proteolytic processing of Reelin through interplay of tissue plasminogen activator (tPA), ADAMTS-4, ADAMTS-5, and their modulators.	Pubmed	4.958e-05	1	0.01856	0.2233	3	4	ADAMTS5,ADAMTS4,RELN
Pubmed	19657833	Description of two new alpha variants: Hb Canuts [alpha85(F6)Asp-->His (alpha1)] and Hb Ambroise Pare [alpha117(GH5)Phe-->Ile (alpha2)]; two new beta variants: Hb Beaujolais [beta84(EF8)Thr-->Asn] and Hb Monplaisir [beta147 (Tyr-Lys-Leu-Ala-Phe-Phe-Leu-Leu-Ser-Asn-Phe-Tyr-158-COOH)] and one new delta variant: Hb (A2)North Africa [delta59(E3)Lys-->Met].	Pubmed	4.958e-05	1	0.01856	0.2233	3	4	HBA1,HBA2,HBB
Pubmed	9371714	Molecular cloning and transient expression in COS7 cells of a novel human PDE4B cAMP-specific phosphodiesterase, HSPDE4B3.	Pubmed	4.958e-05	1	0.01856	0.2233	3	4	PDE4A,PDE4B,PDE4D
Pubmed	16597604	Effects of expression of p53 and Gadd45 on osmotic tolerance of renal inner medullary cells.	Pubmed	4.958e-05	1	0.01856	0.2233	3	4	GADD45B,GADD45G,GADD45A
Pubmed	19926874	Vascular smooth muscle cell apoptosis induces interleukin-1-directed inflammation: effects of hyperlipidemia-mediated inhibition of phagocytosis.	Pubmed	4.958e-05	1	0.01856	0.2233	3	4	CCL2,APOE,IL6
Pubmed	19740759	Peroxidase activity of hemoglobin-haptoglobin complexes: covalent aggregation and oxidative stress in plasma and macrophages.	Pubmed	4.958e-05	1	0.01856	0.2233	3	4	HBA1,HBA2,HBB
Pubmed	21969583	Tissue-intrinsic dysfunction of circadian clock confers transplant arteriosclerosis.	Pubmed	4.958e-05	1	0.01856	0.2233	3	4	ARNTL,PER3,PER2
Pubmed	6683087	Separation of zeta (zeta) and various gamma (gamma) chains of human embryonic hemoglobin Portland I by reverse-phase high-performance liquid chromatography.	Pubmed	4.958e-05	1	0.01856	0.2233	3	4	HBA1,HBA2,HBB
Pubmed	20238042	Proteomic and genomic biomarkers for age-related macular degeneration.	Pubmed	4.958e-05	1	0.01856	0.2233	3	4	ARMS2,C3,HTRA1
Pubmed	22217103	Comparison of ?-adrenergic and glucocorticoid signaling on clock gene and osteoblast-related gene expressions in human osteoblast.	Pubmed	4.958e-05	1	0.01856	0.2233	3	4	ARNTL,PER3,PER2
Pubmed	12716909	CR6-interacting factor 1 interacts with Gadd45 family proteins and modulates the cell cycle.	Pubmed	4.958e-05	1	0.01856	0.2233	3	4	GADD45B,GADD45G,GADD45A
Pubmed	11603807	Alpha-synuclein has an altered conformation and shows a tight intermolecular interaction with ubiquitin in Lewy bodies.	Pubmed	4.958e-05	1	0.01856	0.2233	3	4	SNCA,UBB,UCHL1
Pubmed	22946044	Role of phosphodiesterases in the shaping of sub-plasma-membrane cAMP oscillations and pulsatile insulin secretion.	Pubmed	4.958e-05	1	0.01856	0.2233	3	4	PDE4A,PDE4B,PDE4D
Pubmed	9827804	A family of stress-inducible GADD45-like proteins mediate activation of the stress-responsive MTK1/MEKK4 MAPKKK.	Pubmed	4.958e-05	1	0.01856	0.2233	3	4	GADD45B,GADD45G,GADD45A
Pubmed	28330776	Topical application of glycolic acid suppresses the UVB induced IL-6, IL-8, MCP-1 and COX-2 inflammation by modulating NF-?B signaling pathway in keratinocytes and mice skin.	Pubmed	4.958e-05	1	0.01856	0.2233	3	4	CCL2,IL6,PTGS2
Pubmed	8413254	A family of human phosphodiesterases homologous to the dunce learning and memory gene product of Drosophila melanogaster are potential targets for antidepressant drugs.	Pubmed	4.958e-05	1	0.01856	0.2233	3	4	PDE4A,PDE4B,PDE4D
Pubmed	10455112	Inhibition and restoration of prolactin signal transduction by suppressors of cytokine signaling.	Pubmed	4.958e-05	1	0.01856	0.2233	3	4	SOCS2,PRLR,JAK2
Pubmed	27060751	Dimethyl ester of bilirubin exhibits anti-inflammatory activity through inhibition of secretory phospholipase A2, lipoxygenase and cyclooxygenase.	Pubmed	4.958e-05	1	0.01856	0.2233	3	4	PLA2G2A,PTGS1,PTGS2
Pubmed	20301608	Alpha-Thalassemia	Pubmed	4.958e-05	1	0.01856	0.2233	3	4	HBA1,HBA2,HBB
Pubmed	16649168	Patterning the heart, a template for human cardiomyocyte development.	Pubmed	4.958e-05	1	0.01856	0.2233	3	4	MYL2,NPPA,MYL7
Pubmed	11468283	Inositol 1,4,5-trisphosphate 3-kinase A associates with F-actin and dendritic spines via its N terminus.	Pubmed	4.958e-05	1	0.01856	0.2233	3	4	ACTA1,CAMK2B,ITPKA
Pubmed	12643284	Activation of myelin genes during transdifferentiation from melanoma to glial cell phenotype.	Pubmed	4.958e-05	1	0.01856	0.2233	3	4	MBP,IL6,IL6R
Pubmed	3457014	Type beta transforming growth factor in human platelets: release during platelet degranulation and action on vascular smooth muscle cells.	Pubmed	4.958e-05	1	0.01856	0.2233	3	4	TGFB2,TGFB3,LEFTY2
Pubmed	27168152	Endotoxin Disrupts Circadian Rhythms in Macrophages via Reactive Oxygen Species.	Pubmed	4.958e-05	1	0.01856	0.2233	3	4	ARNTL,PER3,PER2
Pubmed	22355375	Osteoadherin accumulates in the predentin towards the mineralization front in the developing tooth.	Pubmed	4.958e-05	1	0.01856	0.2233	3	4	FMOD,BGN,OMD
Pubmed	11839681	Inhibition of PDE3B augments PDE4 inhibitor-induced apoptosis in a subset of patients with chronic lymphocytic leukemia.	Pubmed	4.958e-05	1	0.01856	0.2233	3	4	PDE4A,PDE4B,PDE4D
Pubmed	27690690	Dissociation of Molecular and Endocrine Circadian Rhythms in Male Mice Lacking Bmal1 in the Adrenal Cortex.	Pubmed	4.958e-05	1	0.01856	0.2233	3	4	ARNTL,PER2,CYP11A1
Pubmed	14506720	Calpain 3 cleaves filamin C and regulates its ability to interact with gamma- and delta-sarcoglycans.	Pubmed	4.958e-05	1	0.01856	0.2233	3	4	SGCD,SGCG,CAPN3
Pubmed	15644445	Phosphodiesterase 4D is required for beta2 adrenoceptor subtype-specific signaling in cardiac myocytes.	Pubmed	4.958e-05	1	0.01856	0.2233	3	4	PDE4A,PDE4B,PDE4D
Pubmed	12752375	Neuronal lineage-specific induction of phospholipase Cepsilon expression in the developing mouse brain.	Pubmed	4.958e-05	1	0.01856	0.2233	3	4	MAP2,NES,PLCE1
Pubmed	19110031	Cell-specific loss of kappa-opioid receptors in oligodendrocytes of the dysmyelinating jimpy mouse.	Pubmed	4.958e-05	1	0.01856	0.2233	3	4	ASIP,PLP1,EDA
Pubmed	19202148	Assessing susceptibility to age-related macular degeneration with proteomic and genomic biomarkers.	Pubmed	4.958e-05	1	0.01856	0.2233	3	4	ARMS2,C3,HTRA1
Pubmed	30730845	Associations between second-trimester amniotic fluid levels of ADAMTS4, ADAMTS5, IL-6, and TNF-? and spontaneous preterm delivery in singleton pregnancies.	Pubmed	4.958e-05	1	0.01856	0.2233	3	4	ADAMTS5,ADAMTS4,IL6
Pubmed	21490132	Celecoxib inhibits interleukin-6/interleukin-6 receptor-induced JAK2/STAT3 phosphorylation in human hepatocellular carcinoma cells.	Pubmed	4.958e-05	1	0.01856	0.2233	3	4	IL6,IL6R,JAK2
Pubmed	21670503	Phosphodiesterase 4B in the cardiac L-type Ca²? channel complex regulates Ca²? current and protects against ventricular arrhythmias in mice.	Pubmed	4.958e-05	1	0.01856	0.2233	3	4	PDE4A,PDE4B,PDE4D
Pubmed	24732776	Ibudilast (AV411), and its AV1013 analog, reduce HIV-1 replication and neuronal death induced by HIV-1 and morphine.	Pubmed	4.958e-05	1	0.01856	0.2233	3	4	PDE4A,PDE4B,PDE4D
Pubmed	10457363	Role and interaction of connective tissue growth factor with transforming growth factor-beta in persistent fibrosis: A mouse fibrosis model.	Pubmed	4.958e-05	1	0.01856	0.2233	3	4	TGFB2,TGFB3,CCN2
Pubmed	19845562	Analysis of complement factor H Y402H, LOC387715, HTRA1 polymorphisms and ApoE alleles with susceptibility to age-related macular degeneration in Hungarian patients.	Pubmed	4.958e-05	1	0.01856	0.2233	3	4	APOE,ARMS2,HTRA1
Pubmed	18190796	KIBRA interacts with discoidin domain receptor 1 to modulate collagen-induced signalling.	Pubmed	4.958e-05	1	0.01856	0.2233	3	4	WWC1,DDR1,PRLR
Pubmed	17827158	Mechanisms for asporin function and regulation in articular cartilage.	Pubmed	4.958e-05	1	0.01856	0.2233	3	4	TGFB2,TGFB3,ASPN
Pubmed	19375854	A reciprocal relationship exists between non-steroidal anti-inflammatory drug-activated gene-1 (NAG-1) and cyclooxygenase-2.	Pubmed	4.958e-05	1	0.01856	0.2233	3	4	GDF15,PTGS1,PTGS2
Pubmed	23337555	Pharmacogenetics for genes associated with age-related macular degeneration in the Comparison of AMD Treatments Trials (CATT).	Pubmed	4.958e-05	1	0.01856	0.2233	3	4	ARMS2,C3,HTRA1
Pubmed	20503266	Allergy and glioma risk: test of association by genotype.	Pubmed	4.958e-05	1	0.01856	0.2233	3	4	IL1RL1,PDE4D,ORMDL3
Pubmed	11435706	Cloning and chromosome mapping of human and chicken Iroquois (IRX) genes.	Pubmed	4.958e-05	1	0.01856	0.2233	3	4	IRX6,IRX1,IRX2
Pubmed	30183107	Dynamical comparison between myoglobin and hemoglobin.	Pubmed	4.958e-05	1	0.01856	0.2233	3	4	HBA1,HBA2,HBB
Pubmed	9171826	Regulation of cardiac mesodermal and neural crest development by the bHLH transcription factor, dHAND.	Pubmed	5.5e-05	1	0.01965	0.2364	4	10	MYH6,MYL2,NPPA,MYL7
Pubmed	15601824	Polybromo protein BAF180 functions in mammalian cardiac chamber maturation.	Pubmed	5.5e-05	1	0.01965	0.2364	4	10	S100A13,MYL2,NPPA,MYL7
Pubmed	18498095	Expression of TGF-betas in the embryonic nervous system: analysis of interbalance between isoforms.	Pubmed	5.5e-05	1	0.01965	0.2364	4	10	MAP2,NES,TGFB2,TGFB3
Pubmed	8499655	Mapping of multiple mouse loci related to the farnesyl pyrophosphate synthetase gene.	Pubmed	5.5e-05	1	0.01965	0.2364	4	10	APOB,C3,NPPA,PLP1
Pubmed	20425806	Vascular at-risk genotypes and disease severity in Lebanese sickle cell disease patients.	Pubmed	5.5e-05	1	0.01965	0.2364	4	10	F5,F13A1,APOB,APOE
Pubmed	19906129	A prospective case-control study analyzes 12 thrombophilic gene mutations in Turkish couples with recurrent pregnancy loss.	Pubmed	5.5e-05	1	0.01965	0.2364	4	10	F5,F13A1,APOB,APOE
Pubmed	14706682	Genetic polymorphisms associated with thrombophilia and vascular disease in women with unexplained late intrauterine fetal death: a multicenter study.	Pubmed	5.5e-05	1	0.01965	0.2364	4	10	F5,F13A1,APOB,APOE
Pubmed	17111197	A comprehensive analysis of 12 thrombophilic mutations and related parameters in patients with inflammatory bowel disease: data from Turkey.	Pubmed	5.5e-05	1	0.01965	0.2364	4	10	F5,F13A1,APOB,APOE
Pubmed	16528748	Suggestive evidence for association of the circadian genes PERIOD3 and ARNTL with bipolar disorder.	Pubmed	5.5e-05	1	0.01965	0.2364	4	10	ARNTL,PER3,PER2,DBP
Pubmed	22705344	Heritability and genome-wide association study to assess genetic differences between advanced age-related macular degeneration subtypes.	Pubmed	5.5e-05	1	0.01965	0.2364	4	10	MBP,ARMS2,C3,HTRA1
Pubmed	26897459	A novel conditional mouse model for Nkx2-5 reveals transcriptional regulation of cardiac ion channels.	Pubmed	5.5e-05	1	0.01965	0.2364	4	10	ATP2A2,MYL2,NPPA,TNNI3
Pubmed	19072566	Prevalence of prothrombotic polymorphisms in Greece.	Pubmed	5.5e-05	1	0.01965	0.2364	4	10	F5,F13A1,APOB,APOE
Pubmed	19336370	Determination of genetic predisposition to patent ductus arteriosus in preterm infants.	Pubmed	5.566e-05	1	0.01982	0.2383	12	130	F5,F13A1,BIRC3,APOB,APOE,GABBR2,IL1RN,IL6,IL10RA,CYP11A1,PTGS1,PTGS2
Pubmed	8043949	Genetic mapping of 40 cDNA clones on the mouse genome by PCR.	Pubmed	5.654e-05	1	0.02005	0.2412	7	43	ACTA1,FASN,HMGN2,CHGB,IL6,CFD,LDHA
Pubmed	27166947	The Chromatin Remodeling Complex Chd4/NuRD Controls Striated Muscle Identity and Metabolic Homeostasis.	Pubmed	5.767e-05	1	0.02032	0.2445	8	58	ACTA1,CORIN,MYH6,NPPA,HEY2,TNNI3,TNNT1,MYLK3
Pubmed	28346476	Reduced dosage of ?-catenin provides significant rescue of cardiac outflow tract anomalies in a Tbx1 conditional null mouse model of 22q11.2 deletion syndrome.	Pubmed	5.796e-05	1	0.02032	0.2445	6	30	FGF10,SMARCD3,MYH6,NPPA,TNNI3,TBX20
Pubmed	21880664	Restrictive loss of plakoglobin in cardiomyocytes leads to arrhythmogenic cardiomyopathy.	Pubmed	5.796e-05	1	0.02032	0.2445	6	30	CCND1,BCL2,NPPA,TGFB2,TGFB3,IL6
Pubmed	21187450	Dragon (repulsive guidance molecule b) inhibits IL-6 expression in macrophages.	Pubmed	6.022e-05	1	0.02081	0.2503	5	19	CCL2,BMP5,BMP7,HJV,IL6
Pubmed	11245568	Embryonic retinoic acid synthesis is essential for heart morphogenesis in the mouse.	Pubmed	6.022e-05	1	0.02081	0.2503	5	19	MYH6,MYL2,LEFTY2,MYL7,GATA5
Pubmed	24840128	A cardiomyocyte-specific Wdr1 knockout demonstrates essential functional roles for actin disassembly during myocardial growth and maintenance in mice.	Pubmed	6.022e-05	1	0.02081	0.2503	5	19	ACTA1,ACTN2,MYH6,NPPA,TNNI3
Pubmed	30700554	Myocardial-specific ablation of	Pubmed	6.022e-05	1	0.02081	0.2503	5	19	ACTA1,MYH6,MYL2,NPPA,TNNI3
Pubmed	12666204	Expression and misexpression of members of the FGF and TGFbeta families of growth factors in the developing mouse pancreas.	Pubmed	6.537e-05	1	0.0225	0.2707	8	59	FGF7,FGF10,FGF12,FGFR4,BMP5,BMP7,TGFB2,TGFB3
Pubmed	19336475	Integrated associations of genotypes with multiple blood biomarkers linked to coronary heart disease risk.	Pubmed	6.871e-05	1	0.02357	0.2834	9	76	APOB,APOE,C3,TGFB3,HMOX1,IL1RN,IL6,IL6R,CFD
Pubmed	15843414	Murine T-box transcription factor Tbx20 acts as a repressor during heart development, and is essential for adult heart integrity, function and adaptation.	Pubmed	7.046e-05	1	0.02399	0.2886	6	31	ATP2A2,MYH6,MYL2,NPPA,MYL7,TBX20
Pubmed	16554359	Activation of Notch1 signaling in cardiogenic mesoderm induces abnormal heart morphogenesis in mouse.	Pubmed	7.046e-05	1	0.02399	0.2886	6	31	MYH6,MYL2,CCND1,NPPA,HEY2,MYL7
Pubmed	26238476	Spatiotemporal regulation of GLI target genes in the mammalian limb bud.	Pubmed	7.397e-05	1	0.0251	0.3018	15	199	IER5,HOOK1,MED30,STXBP6,DLK1,C12orf57,DIPK1C,TPD52L1,PPDPF,XPA,GATA5,TMEM30B,RALGPS2,LTBP1,LUM
Pubmed	12690205	Human chromosome 7: DNA sequence and biology.	Pubmed	7.504e-05	1	0.02537	0.3051	28	536	ADCY1,ADCYAP1R1,AEBP1,GPNMB,AMPH,LMOD2,SMARCD3,MPP6,AZGP1,CASTOR3,TMEM178B,NPTX2,CAMK2B,CRPPA,ORC5,ZNF277,MTURN,PDK4,ABCB1,OSBPL3,IL6,RELN,ITGB8,TBX20,MAFK,AASS,LINC-PINT,TMEM140
Pubmed	12421715	Gene expression profiles of mouse submandibular gland development: FGFR1 regulates branching morphogenesis in vitro through BMP- and FGF-dependent mechanisms.	Pubmed	7.875e-05	1	0.02634	0.3168	5	20	FGF7,FGF10,FGFR4,DLK1,BMP7
Pubmed	25515659	Spontaneous development of hepatocellular carcinoma with cancer stem cell properties in PR-SET7-deficient livers.	Pubmed	7.875e-05	1	0.02634	0.3168	5	20	FGF7,PROM1,CCN2,IL6,KRT19
Pubmed	16920270	Neuronal production and precursor proliferation defects in the neocortex of mice with loss of function in the canonical Wnt signaling pathway.	Pubmed	7.875e-05	1	0.02634	0.3168	5	20	MAP2,NES,CUX2,RELN,LEF1
Pubmed	28675934	Characterization of the Extracellular Matrix of Normal and Diseased Tissues Using Proteomics.	Pubmed	8.037e-05	1	0.02678	0.3221	12	135	F13A1,S100A6,MFAP2,MFAP4,AEBP1,BGN,CTHRC1,COL16A1,CTSG,ASPN,LTBP1,LUM
Pubmed	12796502	Podocan, a novel small leucine-rich repeat protein expressed in the sclerotic glomerular lesion of experimental HIV-associated nephropathy.	Pubmed	8.483e-05	1	0.02746	0.3302	4	11	FMOD,BGN,OMD,LUM
Pubmed	12124778	GADD45b and GADD45g are cdc2/cyclinB1 kinase inhibitors with a role in S and G2/M cell cycle checkpoints induced by genotoxic stress.	Pubmed	8.483e-05	1	0.02746	0.3302	4	11	GADD45B,CCND1,GADD45G,GADD45A
Pubmed	17519332	Canonical Wnt signaling functions in second heart field to promote right ventricular growth.	Pubmed	8.483e-05	1	0.02746	0.3302	4	11	FGF10,SMARCD3,TGFB2,MYL7
Pubmed	8581564	Death of cultured human neuroblastoma cells induced by HIV-1 gp120 is prevented by NMDA receptor antagonists and inhibitors of nitric oxide and cyclooxygenase.	Pubmed	8.483e-05	1	0.02746	0.3302	4	11	GRIN2A,PTGS1,PTGS2,GRIN3A
Pubmed	27909010	ApoER2 Controls Not Only Neuronal Migration in the Intermediate Zone But Also Termination of Migration in the Developing Cerebral Cortex.	Pubmed	8.483e-05	1	0.02746	0.3302	4	11	MAP2,NES,RELN,RORB
Pubmed	19644155	Evaluation of the genetic background of standard-immunosuppressant-related toxicity in a cohort of 200 paediatric renal allograft recipients--a retrospective study.	Pubmed	8.483e-05	1	0.02746	0.3302	4	11	CCL2,ABCB1,IL1RN,IL6
Pubmed	15361625	Advanced cardiac morphogenesis does not require heart tube fusion.	Pubmed	8.483e-05	1	0.02746	0.3302	4	11	FGF10,MYL2,TNNI3,MYL7
Pubmed	17234970	Molecular pathway for the localized formation of the sinoatrial node.	Pubmed	8.483e-05	1	0.02746	0.3302	4	11	NPPA,TNNI3,MYL7,HCN4
Pubmed	19571125	Selective cortical layering abnormalities and behavioral deficits in cortex-specific Pax6 knock-out mice.	Pubmed	8.502e-05	1	0.02746	0.3302	6	32	MBP,NES,CUX2,PLP1,RELN,RORB
Pubmed	28671696	Spatiotemporal profile of postsynaptic interactomes integrates components of complex brain disorders.	Pubmed	8.634e-05	1	0.02779	0.3342	41	928	TBC1D7,MDK,TMEM132B,HOOK1,LRRC7,SORBS2,CAMSAP3,PELP1,ZSCAN18,NT5C2,RACGAP1,BRSK1,FSCN1,PHACTR1,NES,MTCL1,CAMK2B,TPPP,GRIA3,GRIK2,GRIK3,GRIN2A,GRM1,SH3D19,PCNT,PDE4A,PDE4B,TRPC4,CLU,PLP1,SH3KBP1,SPATA20,GABBR2,RGS6,WTIP,OSBPL3,ARHGAP24,KCNJ4,EXOG,HCN4,FARP1
Pubmed	7873877	Identification and genetic mapping of 151 dispersed members of 16 ribosomal protein multigene families in the mouse.	Pubmed	8.84e-05	1	0.02835	0.341	7	46	MBP,FGFR4,ASIP,GPD1,ODC1,HMGN2,ABCB1
Pubmed	26465331	Characterization of the Cardiac Overexpression of HSPB2 Reveals Mitochondrial and Myogenic Roles Supported by a Cardiac HspB2 Interactome.	Pubmed	9.261e-05	1	0.0296	0.3561	12	137	ACTA1,FHL2,SLC25A5,OGDHL,UQCRQ,ATP5ME,MYH6,NACA,BGN,COX7A2L,TNNI3,NDUFA11
Pubmed	19839995	Association study of 21 circadian genes with bipolar I disorder, schizoaffective disorder, and schizophrenia.	Pubmed	0.0001014	1	0.03219	0.3872	5	21	ARNTL,PER3,PER2,DBP,RORB
Pubmed	19217427	AMP-activated protein kinase phosphorylates retinoblastoma protein to control mammalian brain development.	Pubmed	0.0001014	1	0.03219	0.3872	5	21	ACACB,MAP2,MBP,NES,GABBR2
Pubmed	14760718	Screening for N-glycosylated proteins by liquid chromatography mass spectrometry.	Pubmed	0.0001018	1	0.0322	0.3873	7	47	APOB,AZGP1,C3,C7,SERPINA5,CLU,LUM
Pubmed	15475267	Gene discovery by microarray: identification of novel genes induced during growth factor-mediated muscle cell survival and differentiation.	Pubmed	0.0001052	1	0.0322	0.3873	8	63	ERBB3,SYNPO2L,F2R,C1QTNF3,PPFIA4,GATM,HJV,LBH
Pubmed	17474147	Systematic identification of SH3 domain-mediated human protein-protein interactions by peptide array target screening.	Pubmed	0.0001121	1	0.0322	0.3873	20	330	RIN3,MAP4,EXTL1,RRAS,F2RL2,PPFIA4,SLCO2A1,SMARCD3,KIF13A,C6,CENPA,HMGN2,SH3KBP1,MAP2K5,JAK2,URB1,KIF22,HCN4,DUSP15,LTBP2
Pubmed	26378152	LKB1 deletion causes early changes in atrial channel expression and electrophysiology prior to atrial fibrillation.	Pubmed	0.0001213	1	0.0322	0.3873	6	34	ACACB,ATP2A2,MYH6,CCN2,KCNJ8,KCNK3
Pubmed	11713228	Cytokine-inducible SH2-containing protein suppresses PRL signaling by binding the PRL receptor.	Pubmed	0.0001218	1	0.0322	0.3873	3	5	SOCS3,PRLR,JAK2
Pubmed	9620692	Oligodendrocyte population dynamics and the role of PDGF in vivo.	Pubmed	0.0001218	1	0.0322	0.3873	3	5	MBP,PDGFRA,PLP1
Pubmed	18508827	Haem oxygenase-1 plays a central role in NNK-mediated lung carcinogenesis.	Pubmed	0.0001218	1	0.0322	0.3873	3	5	BIRC3,BCL2,HMOX1
Pubmed	22004471	Genome-wide significant association between alcohol dependence and a variant in the ADH gene cluster.	Pubmed	0.0001218	1	0.0322	0.3873	3	5	ADH1B,SGCG,GPD1L
Pubmed	25450958	Comparative analysis of developmentally regulated expressions of Gadd45a, Gadd45b, and Gadd45g in the mouse and marmoset cerebral cortex.	Pubmed	0.0001218	1	0.0322	0.3873	3	5	GADD45B,GADD45G,GADD45A
Pubmed	18385073	Novel allele of crybb2 in the mouse and its expression in the brain.	Pubmed	0.0001218	1	0.0322	0.3873	3	5	SCG5,CAPN3,STMN1
Pubmed	18506028	C3G regulates cortical neuron migration, preplate splitting and radial glial cell attachment.	Pubmed	0.0001218	1	0.0322	0.3873	3	5	MAP2,NES,RELN
Pubmed	18665050	Heme oxygenase-1 induction in macrophages by a hemoglobin-based oxygen carrier reduces endotoxin-stimulated cytokine secretion.	Pubmed	0.0001218	1	0.0322	0.3873	3	5	CCL2,HMOX1,IL6
Pubmed	30271984	Activated protein C reverses epigenetically sustained p66	Pubmed	0.0001218	1	0.0322	0.3873	3	5	F2R,F2RL2,APOE
Pubmed	17916326	Membrane interactions of hemoglobin variants, HbA, HbE, HbF and globin subunits of HbA: effects of aminophospholipids and cholesterol.	Pubmed	0.0001218	1	0.0322	0.3873	3	5	HBA1,HBA2,HBB
Pubmed	8586960	A mouse homolog of dunce, a gene important for learning and memory in Drosophila, is preferentially expressed in olfactory receptor neurons.	Pubmed	0.0001218	1	0.0322	0.3873	3	5	PDE4A,PDE4B,PDE4D
Pubmed	16474407	Rhythmic CLOCK-BMAL1 binding to multiple E-box motifs drives circadian Dbp transcription and chromatin transitions.	Pubmed	0.0001218	1	0.0322	0.3873	3	5	ARNTL,PER2,DBP
Pubmed	24385426	Gene model 129 (Gm129) encodes a novel transcriptional repressor that modulates circadian gene expression.	Pubmed	0.0001218	1	0.0322	0.3873	3	5	ARNTL,PER2,CIART
Pubmed	21113167	The histone methyltransferase MLL1 permits the oscillation of circadian gene expression.	Pubmed	0.0001218	1	0.0322	0.3873	3	5	ARNTL,PER2,DBP
Pubmed	15375804	Prevention of head and neck cancer: current status and future prospects.	Pubmed	0.0001218	1	0.0322	0.3873	3	5	CCND1,PTGS1,PTGS2
Pubmed	18620607	Fragmentation of decorin, biglycan, lumican and keratocan is elevated in degenerate human meniscus, knee and hip articular cartilages compared with age-matched macroscopically normal and control tissues.	Pubmed	0.0001218	1	0.0322	0.3873	3	5	FMOD,BGN,LUM
Pubmed	25136113	IL-6/STAT3 promotes regeneration of airway ciliated cells from basal stem cells.	Pubmed	0.0001218	1	0.0322	0.3873	3	5	SOCS3,PDGFRA,IL6
Pubmed	16908628	An oligodendrocyte-specific zinc-finger transcription regulator cooperates with Olig2 to promote oligodendrocyte differentiation.	Pubmed	0.0001218	1	0.0322	0.3873	3	5	MBP,PDGFRA,PLP1
Pubmed	11159543	Expression, purification, and characterization of human hemoglobins Gower-1 (zeta(2)epsilon(2)), Gower-2 (alpha(2)epsilon(2)), and Portland-2 (zeta(2)beta(2)) assembled in complex transgenic-knockout mice.	Pubmed	0.0001218	1	0.0322	0.3873	3	5	HBA1,HBA2,HBB
Pubmed	15509702	Genetic influences on ovulation of primary oocytes in LT/Sv strain mice.	Pubmed	0.0001218	1	0.0322	0.3873	3	5	MAP2,BCL2,SERPINE2
Pubmed	18848976	Candidate EDA targets revealed by expression profiling of primary keratinocytes from Tabby mutant mice.	Pubmed	0.0001218	1	0.0322	0.3873	3	5	ASIP,BMP7,EDA
Pubmed	21953030	Analysis of acute-phase proteins, AHSG, C3, CLI, HP and SAA, reveals distinctive expression patterns associated with breast, colorectal and lung cancer.	Pubmed	0.0001218	1	0.0322	0.3873	3	5	SAA1,C3,CLU
Pubmed	12843397	Altered patterns of sleep and behavioral adaptability in NPAS2-deficient mice.	Pubmed	0.0001218	1	0.0322	0.3873	3	5	ARNTL,PER3,PER2
Pubmed	24552666	Genes encoding proteoglycans are associated with the risk of anterior cruciate ligament ruptures.	Pubmed	0.0001218	1	0.0322	0.3873	3	5	FMOD,BGN,LUM
Pubmed	21652625	Interaction between LIS1 and PDE4, and its role in cytoplasmic dynein function.	Pubmed	0.0001218	1	0.0322	0.3873	3	5	PDE4A,PDE4B,PDE4D
Pubmed	8081873	Structure, genetic mapping, and expression of the mouse Hgf/scatter factor gene.	Pubmed	0.0001218	1	0.0322	0.3873	3	5	ABCB1,IL6,RELN
Pubmed	25071214	Epigenetic coordination of embryonic heart transcription by dynamically regulated long noncoding RNAs.	Pubmed	0.0001218	1	0.0322	0.3873	3	5	ACTA1,ATP2A2,NPPA
Pubmed	12629673	Recruitment of intra- and extracardiac cells into the myocardial lineage during mouse development.	Pubmed	0.0001218	1	0.0322	0.3873	3	5	ATP2A2,MYH6,MYL2
Pubmed	25349050	Cell-specific and developmental expression of lectican-cleaving proteases in mouse hippocampus and neocortex.	Pubmed	0.0001218	1	0.0322	0.3873	3	5	ADAMTS15,ADAMTS5,ADAMTS4
Pubmed	10446263	jumonji gene is essential for the neurulation and cardiac development of mouse embryos with a C3H/He background.	Pubmed	0.0001218	1	0.0322	0.3873	3	5	MYH6,MYL2,MYL7
Pubmed	10427098	ZASP: a new Z-band alternatively spliced PDZ-motif protein.	Pubmed	0.0001218	1	0.0322	0.3873	3	5	ACTN2,MYOZ1,MYOZ3
Pubmed	23331954	The regulatory roles of small leucine-rich proteoglycans in extracellular matrix assembly.	Pubmed	0.0001218	1	0.0322	0.3873	3	5	FMOD,BGN,LUM
Pubmed	9010342	Changes in levels of mRNAs of transforming growth factor (TGF)-beta1, -beta2, -beta3, TGF-beta type II receptor and sulfated glycoprotein-2 during apoptosis of mouse uterine epithelium.	Pubmed	0.0001218	1	0.0322	0.3873	3	5	TGFB2,TGFB3,CLU
Pubmed	30242047	Molecular and Genetic Evidence for the PDGFR?-Independent Population of Oligodendrocyte Progenitor Cells in the Developing Mouse Brain.	Pubmed	0.0001218	1	0.0322	0.3873	3	5	MBP,PDGFRA,PLP1
Pubmed	9853961	Bmp-2 downstream targets in mesenchymal development identified by subtractive cloning from recombinant mesenchymal progenitors (C3H10T1/2).	Pubmed	0.0001218	1	0.0322	0.3873	3	5	DHRS3,ENPP2,G0S2
Pubmed	19687358	Hypercoagulability inhibits monocyte transendothelial migration through protease-activated receptor-1-, phospholipase-Cbeta-, phosphoinositide 3-kinase-, and nitric oxide-dependent signaling in monocytes and promotes plaque stability.	Pubmed	0.0001218	1	0.0322	0.3873	3	5	F2R,F5,APOE
Pubmed	16034137	Bacterial induction of TNF-alpha converting enzyme expression and IL-6 receptor alpha shedding regulates airway inflammatory signaling.	Pubmed	0.0001218	1	0.0322	0.3873	3	5	CCL2,IL6,IL6R
Pubmed	10330429	Distinct roles of prostaglandin H synthases 1 and 2 in T-cell development.	Pubmed	0.0001218	1	0.0322	0.3873	3	5	THY1,PTGS1,PTGS2
Pubmed	5962396	A comparison of the mutagenic effectiveness of chronic neutron- and gamma-irradiation of mouse spermatogonia.	Pubmed	0.0001218	1	0.0322	0.3873	3	5	ASIP,BMP5,TYRP1
Pubmed	21943708	Mechanisms of mannose-binding lectin-associated serine proteases-1/3 activation of the alternative pathway of complement.	Pubmed	0.0001218	1	0.0322	0.3873	3	5	C3,MASP1,CFD
Pubmed	12618859	Genetic polymorphisms in Spanish rheumatoid arthritis patients: an association and linkage study.	Pubmed	0.0001218	1	0.0322	0.3873	3	5	FCGR3A,IL1RN,IL6
Pubmed	8106553	Betaglycan can act as a dual modulator of TGF-beta access to signaling receptors: mapping of ligand binding and GAG attachment sites.	Pubmed	0.0001218	1	0.0322	0.3873	3	5	TGFB2,TGFB3,TGFBR3
Pubmed	9742149	Requirement for early-generated neurons recognized by monoclonal antibody lot1 in the formation of lateral olfactory tract.	Pubmed	0.0001218	1	0.0322	0.3873	3	5	MAP2,GRM1,RELN
Pubmed	17272867	Few associations of candidate genes with nonsyndromic orofacial clefts in the population of Lithuania.	Pubmed	0.0001218	1	0.0322	0.3873	3	5	GABRB3,TGFA,TGFB3
Pubmed	24944008	MicroRNA-100-5p indirectly modulates the expression of Il6, Ptgs1/2 and Tlr4 mRNA in the mouse follicular dendritic cell-like cell line, FL-Y.	Pubmed	0.0001218	1	0.0322	0.3873	3	5	IL6,PTGS1,PTGS2
Pubmed	19168721	Interaction of vascular smooth muscle cells and monocytes by soluble factors synergistically enhances IL-6 and MCP-1 production.	Pubmed	0.0001218	1	0.0322	0.3873	3	5	CCL2,APOE,IL6
Pubmed	1450512	Mouse microsatellites from a flow-sorted 4:6 Robertsonian chromosome.	Pubmed	0.0001249	1	0.0322	0.3873	4	12	BCL2,NGFR,NPPA,TYRP1
Pubmed	31042497	SEMA6D regulates perinatal cardiomyocyte proliferation and maturation in mice.	Pubmed	0.0001249	1	0.0322	0.3873	4	12	ACTA1,CCND1,TNNI3,MYL7
Pubmed	11950896	Overexpression of Polycomb-group gene rae28 in cardiomyocytes does not complement abnormal cardiac morphogenesis in mice lacking rae28 but causes dilated cardiomyopathy.	Pubmed	0.0001249	1	0.0322	0.3873	4	12	ACTA1,MYH6,MYL2,NPPA
Pubmed	8009369	Chromosome localizations of genes for five cAMP-specific phosphodiesterases in man and mouse.	Pubmed	0.0001249	1	0.0322	0.3873	4	12	PDE4A,PDE4B,PDE4D,TYRP1
Pubmed	10807864	Jumonji, a nuclear protein that is necessary for normal heart development.	Pubmed	0.0001249	1	0.0322	0.3873	4	12	MYH6,MYL2,NPPA,MYL7
Pubmed	1794049	Mononucleotide repeats are an abundant source of length variants in mouse genomic DNA.	Pubmed	0.0001249	1	0.0322	0.3873	4	12	CCL2,ODC1,THY1,IL6
Pubmed	17332425	CHF1/Hey2 plays a pivotal role in left ventricular maturation through suppression of ectopic atrial gene expression.	Pubmed	0.0001249	1	0.0322	0.3873	4	12	MYL2,NPPA,HEY2,MYL7
Pubmed	17823370	Pitx2c and Nkx2-5 are required for the formation and identity of the pulmonary myocardium.	Pubmed	0.0001249	1	0.0322	0.3873	4	12	ATP2A2,TNNI3,TBX20,HCN4
Pubmed	27499296	Mitochondrial Protein Interaction Mapping Identifies Regulators of Respiratory Chain Function.	Pubmed	0.0001269	1	0.0322	0.3873	23	413	CHDH,MGST1,NCEH1,SLC25A5,UQCC2,CHCHD6,EFHD1,UQCRQ,ATP5ME,RAB24,ISCU,COX7A2L,DDAH1,MRPL57,COX7A2,SPATA20,CPT1A,NDUFA11,MRPL40,ABHD11,BOLA3,MRPL46,SDHAF4
Pubmed	9136933	Requirement of the transcription factor GATA4 for heart tube formation and ventral morphogenesis.	Pubmed	0.0001287	1	0.0322	0.3873	5	22	APOE,MYH6,NPPA,MYL7,GATA5
Pubmed	12768436	Characterization of 458 single nucleotide polymorphisms of disease candidate genes in the Korean population.	Pubmed	0.0001287	1	0.0322	0.3873	5	22	SELE,DLK1,NGFR,NPR3,IL1RN
Pubmed	20399730	The apical complex couples cell fate and cell survival to cerebral cortical development.	Pubmed	0.0001287	1	0.0322	0.3873	5	22	MAP2,NES,CUX2,PCNT,RELN
Pubmed	8075499	Maps from two interspecific backcross DNA panels available as a community genetic mapping resource.	Pubmed	0.0001335	1	0.0322	0.3873	7	49	ACTA1,FASN,ASIP,NPPA,CLU,PLP1,CFD
Pubmed	14759258	An unappreciated role for RNA surveillance.	Pubmed	0.0001386	1	0.0322	0.3873	10	102	MAP2,MAP4,ADAM11,IL17RB,IL1RL1,PDE4A,MAP3K7CL,SNHG32,TSPAN32,LEF1
Pubmed	18973680	Microarray analysis of Foxa2 mutant mouse embryos reveals novel gene expression and inductive roles for the gastrula organizer and its derivatives.	Pubmed	0.0001395	1	0.0322	0.3873	18	284	MDK,MFAP2,MGST1,SCN2B,AMPH,SCG5,EFHD1,FRZB,PROM1,RAB24,NPTX2,PKIG,MYL7,GPR180,CTHRC1,CCDC28A,COX7B,HTRA1
Pubmed	19322201	Ubiquitin-mediated proteolysis of HuR by heat shock.	Pubmed	0.0001407	1	0.0322	0.3873	63	1671	ACACB,AFMID,TC2N,MGST3,SETD9,AMD1,SLC27A6,PHLDA1,R3HDM2,AZIN1,ATP2A2,IFI6,SPOCK1,EXPH5,STK26,LPCAT4,FRS3,CCND1,TSPAN9,GPD1L,PER2,PPIL3,TUBA3D,TGFA,TGFB3,TGFBR3,C1orf198,SH3D19,COX7A2L,MTURN,TPM3,DDAH1,DHRS3,U2AF1L4,HMGB2,HMOX1,GPR180,SERPINE2,MEAF6,ADAMTS4,CCDC28A,SH3KBP1,IRX1,NRIP3,ADAMTSL5,OSBPL3,CCN2,PTDSS1,AIF1L,TXNL4B,DIO2,TMCO3,RHNO1,TSC22D3,ZDHHC14,DUSP15,APIP,ORMDL3,FARP1,LRRC1,MARVELD2,T…
Pubmed	18676816	Laminin-511 is an epithelial message promoting dermal papilla development and function during early hair morphogenesis.	Pubmed	0.0001435	1	0.0322	0.3873	6	35	NES,PROM1,PDGFRA,SERPINE2,EDA,LEF1
Pubmed	22407321	MEGF10 and MEGF11 mediate homotypic interactions required for mosaic spacing of retinal neurons.	Pubmed	0.0001435	1	0.0322	0.3873	6	35	GALNT15,ABCC8,TGFB3,NRIP3,CCN2,HTRA1
Pubmed	18513389	New application of intelligent agents in sporadic amyotrophic lateral sclerosis identifies unexpected specific genetic background.	Pubmed	0.0001435	1	0.0322	0.3873	6	35	F5,SELE,APOB,APOE,GNB3,NPPA
Pubmed	16284245	Fezl regulates the differentiation and axon targeting of layer 5 subcortical projection neurons in cerebral cortex.	Pubmed	0.0001605	1	0.0322	0.3873	11	124	NPR3,GRB14,OPN3,SERPINE2,SEMA5B,CRYM,RELN,TMEM163,PTPRU,RORB,LUM
Pubmed	20301690	Brugada Syndrome	Pubmed	0.0001613	1	0.0322	0.3873	5	23	SCN2B,FGF12,GPD1L,KCNJ8,HCN4
Pubmed	25875176	Functional synergy between cholecystokinin receptors CCKAR and CCKBR in mammalian brain development.	Pubmed	0.0001613	1	0.0322	0.3873	5	23	BMP7,CUX2,CCN2,RELN,RORB
Pubmed	8464923	Chromosomal localization of glutamate receptor genes: relationship to familial amyotrophic lateral sclerosis and other neurological disorders of mice and humans.	Pubmed	0.0001613	1	0.0322	0.3873	5	23	GRIA3,GRIK2,GRIK3,THY1,IL1RN
Pubmed	15963767	Expression of Fgf and Tgfbeta signaling related genes during embryonic endochondral ossification.	Pubmed	0.0001729	1	0.0322	0.3873	7	51	FGF7,FGF10,FGF12,FGFR4,BMP7,TGFB2,TGFB3
Pubmed	11829488	Evolution of the regulators of G-protein signaling multigene family in mouse and human.	Pubmed	0.0001729	1	0.0322	0.3873	7	51	FGFR4,MYBL1,RGS11,TGFB2,TYRP1,RGS6,IL6
Pubmed	20859245	Glutamatergic gene variants impact the clinical profile of efficacy and side effects of haloperidol.	Pubmed	0.0001771	1	0.0322	0.3873	4	13	GRIA3,GRIK2,GRIK3,GRM1
Pubmed	19726871	MicroRNA-208a is a regulator of cardiac hypertrophy and conduction in mice.	Pubmed	0.0001771	1	0.0322	0.3873	4	13	MYH6,MSTN,NPPA,TMEM163
Pubmed	22343712	CIP, a cardiac Isl1-interacting protein, represses cardiomyocyte hypertrophy.	Pubmed	0.0001771	1	0.0322	0.3873	4	13	ACTN2,MYH6,NPPA,TNNI3
Pubmed	21447557	Coordinated regulation of differentiation and proliferation of embryonic cardiomyocytes by a jumonji (Jarid2)-cyclin D1 pathway.	Pubmed	0.0001771	1	0.0322	0.3873	4	13	MYH6,MYL2,CCND1,NPPA
Pubmed	12024206	Prokineticin 2 transmits the behavioural circadian rhythm of the suprachiasmatic nucleus.	Pubmed	0.0001771	1	0.0322	0.3873	4	13	ARNTL,PER3,PER2,DBP
Pubmed	16702235	M line-deficient titin causes cardiac lethality through impaired maturation of the sarcomere.	Pubmed	0.0001771	1	0.0322	0.3873	4	13	FHL2,NPPA,TGFB2,MAP2K5
Pubmed	21125652	Peripheral contributions to olfactory bulb cell populations (migrations towards the olfactory bulb).	Pubmed	0.0001771	1	0.0322	0.3873	4	13	MAP2,NES,NGFR,THY1
Pubmed	7628699	Myogenic and morphogenetic defects in the heart tubes of murine embryos lacking the homeo box gene Nkx2-5.	Pubmed	0.0001771	1	0.0322	0.3873	4	13	MYH6,MYL2,TNNI3,MYL7
Pubmed	18840685	SOX5 postmitotically regulates migration, postmigratory differentiation, and projections of subplate and deep-layer neocortical neurons.	Pubmed	0.0001771	1	0.0322	0.3873	4	13	MAP2,CCN2,RELN,RORB
Pubmed	28771943	Overexpression of integrin ?11 induces cardiac fibrosis in mice.	Pubmed	0.0001771	1	0.0322	0.3873	4	13	MYH6,TGFB2,TGFB3,GDF15
Pubmed	15076187	Genetic influences on blood pressure within the Stanislas Cohort.	Pubmed	0.0001771	1	0.0322	0.3873	4	13	F5,SELE,APOB,APOE
Pubmed	16151852	Apoptosis, proliferation and gene expression patterns in mouse developing tongue.	Pubmed	0.0001771	1	0.0322	0.3873	4	13	FGF7,FGF10,BMP5,BMP7
Pubmed	20484876	Synopsis of preterm birth genetic association studies: the preterm birth genetics knowledge base (PTBGene).	Pubmed	0.0001771	1	0.0322	0.3873	4	13	F5,IL1RN,IL6,IL6R
Pubmed	19860767	Genetic cardiovascular risk factors and age-related macular degeneration.	Pubmed	0.0001771	1	0.0322	0.3873	4	13	F5,F13A1,APOB,APOE
Pubmed	25621764	Translation of 5' leaders is pervasive in genes resistant to eIF2 repression.	Pubmed	0.0001771	1	0.0322	0.3873	4	13	AZIN1,C19orf48,PCNX4,PPP1R15A
Pubmed	19559392	A candidate gene association study of 77 polymorphisms in migraine.	Pubmed	0.0001958	1	0.0322	0.3873	7	52	F5,CCL11,SELE,C3,GNB3,NPPA,IL6
Pubmed	16330018	Brg1 is required for murine neural stem cell maintenance and gliogenesis.	Pubmed	0.0001998	1	0.0322	0.3873	5	24	MBP,NES,PDGFRA,PLP1,RELN
Pubmed	25382630	Type III transforming growth factor beta receptor regulates vascular and osteoblast development during palatogenesis.	Pubmed	0.0001998	1	0.0322	0.3873	5	24	LYVE1,RUNX2,TGFB2,TGFB3,TGFBR3
Pubmed	20185815	Hedgehog signaling in pancreas epithelium regulates embryonic organ formation and adult beta-cell function.	Pubmed	0.0001998	1	0.0322	0.3873	5	24	FGF10,CCND1,BMP5,BMP7,LEF1
Pubmed	21655085	FGF signaling regulates the number of posterior taste papillae by controlling progenitor field size.	Pubmed	0.0001998	1	0.0322	0.3873	5	24	FGF7,FGF10,FGFR4,BMP7,TMEM163
Pubmed	15136142	Runx2 mediates FGF signaling from epithelium to mesenchyme during tooth morphogenesis.	Pubmed	0.0001998	1	0.0322	0.3873	5	24	FGF10,ASIP,RUNX2,EDA,LEF1
Pubmed	16892058	The Rho-GTPase cdc42 regulates neural progenitor fate at the apical surface.	Pubmed	0.0001998	1	0.0322	0.3873	5	24	MAP2,F2RL2,NES,PROM1,CUX2
Pubmed	19058789	A common variant in DRD3 receptor is associated with autism spectrum disorder.	Pubmed	0.0002274	1	0.0322	0.3873	11	129	ADCY1,SCG5,GABRB3,BCL2,PER2,NPTX2,CAMK2B,GRIN2A,CADPS2,IL1RN,RELN
Pubmed	20167925	Zac1 is an essential transcription factor for cardiac morphogenesis.	Pubmed	0.0002393	1	0.0322	0.3873	3	6	MYL2,NPPA,MYL7
Pubmed	11157754	Type III TGF-beta receptor-independent signalling of TGF-beta2 via TbetaRII-B, an alternatively spliced TGF-beta type II receptor.	Pubmed	0.0002393	1	0.0322	0.3873	3	6	TGFB2,TGFB3,TGFBR3
Pubmed	19117936	Prediction model for prevalence and incidence of advanced age-related macular degeneration based on genetic, demographic, and environmental variables.	Pubmed	0.0002393	1	0.0322	0.3873	3	6	ARMS2,C3,HTRA1
Pubmed	17994314	Haemostatic genetic variants, ABO blood group and bleeding risk during oral anticoagulant treatment after cerebral ischaemia of arterial origin.	Pubmed	0.0002393	1	0.0322	0.3873	3	6	F5,F13A1,APOE
Pubmed	9989497	A molecular mechanism regulating rhythmic output from the suprachiasmatic circadian clock.	Pubmed	0.0002393	1	0.0322	0.3873	3	6	ARNTL,PER3,PER2
Pubmed	20870940	Essential role of complement mannose-binding lectin-associated serine proteases-1/3 in the murine collagen antibody-induced model of inflammatory arthritis.	Pubmed	0.0002393	1	0.0322	0.3873	3	6	C3,MASP1,CFD
Pubmed	11275690	Interleukin-6 signaling and embryonic mouse submandibular salivary gland morphogenesis.	Pubmed	0.0002393	1	0.0322	0.3873	3	6	BCL2,IL6,IL6R
Pubmed	19182256	Exploring functional candidate genes for genetic association in german patients with pseudoexfoliation syndrome and pseudoexfoliation glaucoma.	Pubmed	0.0002393	1	0.0322	0.3873	3	6	MFAP2,CLU,LTBP2
Pubmed	7852346	The soluble exoplasmic domain of the type II transforming growth factor (TGF)-beta receptor. A heterogeneously glycosylated protein with high affinity and selectivity for TGF-beta ligands.	Pubmed	0.0002393	1	0.0322	0.3873	3	6	TGFB2,TGFB3,TGFBR3
Pubmed	12666199	Differential expression of decorin and biglycan genes during palatogenesis in normal and retinoic acid-treated mice.	Pubmed	0.0002393	1	0.0322	0.3873	3	6	BGN,TGFB2,TGFB3
Pubmed	16469306	Evidence for motoneuron lineage-specific regulation of Olig2 in the vertebrate neural tube.	Pubmed	0.0002393	1	0.0322	0.3873	3	6	MBP,PDGFRA,PLP1
Pubmed	27105433	Inhibition of Hb Binding to GP1b? Abrogates Hb-Mediated Thrombus Formation on Immobilized VWF and Collagen under Physiological Shear Stress.	Pubmed	0.0002393	1	0.0322	0.3873	3	6	HBA1,HBA2,HBB
Pubmed	16444434	Effect of various genetic polymorphisms on the incidence and outcome of severe sepsis.	Pubmed	0.0002393	1	0.0322	0.3873	3	6	F5,CTSG,IL6
Pubmed	17409491	Characterization of the molecular clock in mouse peritoneal macrophages.	Pubmed	0.0002393	1	0.0322	0.3873	3	6	CCL2,ARNTL,IL6
Pubmed	17182786	Collapsin response mediator protein 1 mediates reelin signaling in cortical neuronal migration.	Pubmed	0.0002393	1	0.0322	0.3873	3	6	MAP2,NES,RELN
Pubmed	9889194	Mutational analyses of the SOCS proteins suggest a dual domain requirement but distinct mechanisms for inhibition of LIF and IL-6 signal transduction.	Pubmed	0.0002393	1	0.0322	0.3873	3	6	SOCS2,SOCS3,JAK2
Pubmed	14750904	Phosphorylation of clock protein PER1 regulates its circadian degradation in normal human fibroblasts.	Pubmed	0.0002393	1	0.0322	0.3873	3	6	ARNTL,PER3,PER2
Pubmed	15534175	Meta-analysis of genetic studies in ischemic stroke: thirty-two genes involving approximately 18,000 cases and 58,000 controls.	Pubmed	0.0002393	1	0.0322	0.3873	3	6	F5,F13A1,APOE
Pubmed	15617678	Role of presenilin-1 in cortical lamination and survival of Cajal-Retzius neurons.	Pubmed	0.0002393	1	0.0322	0.3873	3	6	MAP2,NES,RELN
Pubmed	18923023	Distinct roles of PDE4 and PDE10A in the regulation of cAMP/PKA signaling in the striatum.	Pubmed	0.0002393	1	0.0322	0.3873	3	6	PDE4A,PDE4B,PDE4D
Pubmed	20408909	Comparison of Iroquois gene expression in limbs/fins of vertebrate embryos.	Pubmed	0.0002393	1	0.0322	0.3873	3	6	IRX6,IRX1,IRX2
Pubmed	19661236	Plasma complement components and activation fragments: associations with age-related macular degeneration genotypes and phenotypes.	Pubmed	0.0002393	1	0.0322	0.3873	3	6	AMD1,ARMS2,C3
Pubmed	23516551	Gadd45g is essential for primary sex determination, male fertility and testis development.	Pubmed	0.0002393	1	0.0322	0.3873	3	6	GADD45B,GADD45G,GADD45A
Pubmed	10777583	SOCS3 exerts its inhibitory function on interleukin-6 signal transduction through the SHP2 recruitment site of gp130.	Pubmed	0.0002393	1	0.0322	0.3873	3	6	SOCS3,IL6,IL6R
Pubmed	26390289	Regional differences in WT-1 and Tcf21 expression during ventricular development: implications for myocardial compaction.	Pubmed	0.0002393	1	0.0322	0.3873	3	6	TNNI3,PDGFRA,MYL7
Pubmed	28886335	Macromolecular Assemblies of the Mammalian Circadian Clock.	Pubmed	0.0002393	1	0.0322	0.3873	3	6	ARNTL,PER3,PER2
Pubmed	9988221	Molecular bases for circadian clocks.	Pubmed	0.0002393	1	0.0322	0.3873	3	6	ARNTL,PER3,PER2
Pubmed	20083684	Failure of postnatal ductus arteriosus closure in prostaglandin transporter-deficient mice.	Pubmed	0.0002393	1	0.0322	0.3873	3	6	SLCO2A1,PTGS1,PTGS2
Pubmed	24272803	Small leucine-rich proteoglycans exhibit unique spatiotemporal expression profiles during cardiac valve development.	Pubmed	0.0002393	1	0.0322	0.3873	3	6	FMOD,BGN,LUM
Pubmed	28258213	Nectin-4 co-stimulates the prolactin receptor by interacting with SOCS1 and inhibiting its activity on the JAK2-STAT5a signaling pathway.	Pubmed	0.0002393	1	0.0322	0.3873	3	6	PRLR,JAK2,NECTIN1
Pubmed	30295604	BRCT domains of the DNA damage checkpoint proteins TOPBP1/Rad4 display distinct specificities for phosphopeptide ligands.	Pubmed	0.0002393	1	0.0322	0.3873	3	6	BLM,RHNO1,RAD9A
Pubmed	10370142	Regulated expression patterns of IRX-2, an Iroquois-class homeobox gene, in the human breast.	Pubmed	0.0002393	1	0.0322	0.3873	3	6	IRX6,IRX1,IRX2
Pubmed	15044949	GADD45beta/GADD45gamma and MEKK4 comprise a genetic pathway mediating STAT4-independent IFNgamma production in T cells.	Pubmed	0.0002393	1	0.0322	0.3873	3	6	GADD45B,GADD45G,GADD45A
Pubmed	20829506	Matrix metalloproteinase 2 and 9 dysfunction underlie vascular stiffness in circadian clock mutant mice.	Pubmed	0.0002393	1	0.0322	0.3873	3	6	ARNTL,PER3,PER2
Pubmed	11042145	Organization of mouse Iroquois homeobox genes in two clusters suggests a conserved regulation and function in vertebrate development.	Pubmed	0.0002393	1	0.0322	0.3873	3	6	IRX6,IRX1,IRX2
Pubmed	18467625	Transcription factor Tbx3 is required for the specification of the atrioventricular conduction system.	Pubmed	0.0002433	1	0.0322	0.3873	4	14	NPPA,TNNI3,TBX20,HCN4
Pubmed	22241839	Excitatory glutamate is essential for development and maintenance of the piloneural mechanoreceptor.	Pubmed	0.0002433	1	0.0322	0.3873	4	14	NES,GRIK2,GRIK3,GRM1
Pubmed	14667410	Isl1 identifies a cardiac progenitor population that proliferates prior to differentiation and contributes a majority of cells to the heart.	Pubmed	0.0002433	1	0.0322	0.3873	4	14	FGF10,MYL2,BMP7,MYL7
Pubmed	26324903	Noncanonical role of transferrin receptor 1 is essential for intestinal homeostasis.	Pubmed	0.0002433	1	0.0322	0.3873	4	14	LYVE1,TFRC,TGFB2,TGFB3
Pubmed	21665990	Common variants near FRK/COL10A1 and VEGFA are associated with advanced age-related macular degeneration.	Pubmed	0.0002433	1	0.0322	0.3873	4	14	FRK,ARMS2,C3,HTRA1
Pubmed	21839733	GATA5 interacts with GATA4 and GATA6 in outflow tract development.	Pubmed	0.0002433	1	0.0322	0.3873	4	14	BMP7,NPPA,GATA5,TBX20
Pubmed	20080568	c-Abl tyrosine kinase regulates cardiac growth and development.	Pubmed	0.0002433	1	0.0322	0.3873	4	14	MYH6,CCND1,NPPA,CCN2
Pubmed	16873583	Basement membrane attachment is dispensable for radial glial cell fate and for proliferation, but affects positioning of neuronal subtypes.	Pubmed	0.0002433	1	0.0322	0.3873	4	14	NES,CUX2,RELN,RORB
Pubmed	20204402	Analysis of common germline polymorphisms as prognostic factors in patients with lymph node-positive breast cancer.	Pubmed	0.0002433	1	0.0322	0.3873	4	14	CCND1,SULT1A1,GNB3,PTGS2
Pubmed	22522171	Id proteins synchronize stemness and anchorage to the niche of neural stem cells.	Pubmed	0.000245	1	0.0322	0.3873	5	25	MBP,NES,CCND1,PDGFRA,RAP1GAP
Pubmed	15767668	GATA6 is essential for embryonic development of the liver but dispensable for early heart formation.	Pubmed	0.000245	1	0.0322	0.3873	5	25	ACTA1,MYH6,MYL2,NPPA,MYL7
Pubmed	25805134	Submandibular parasympathetic gangliogenesis requires sprouty-dependent Wnt signals from epithelial progenitors.	Pubmed	0.000245	1	0.0322	0.3873	5	25	ERBB3,FGF7,FGF10,TMEM163,KRT19
Pubmed	21362171	An expression profile analysis of ES cell-derived definitive endodermal cells and Pdx1-expressing cells.	Pubmed	0.000245	1	0.0322	0.3873	5	25	FHL2,APOE,NPTX2,PCBD1,LBH
Pubmed	27518902	HIRA Is Required for Heart Development and Directly Regulates Tnni2 and Tnnt3.	Pubmed	0.000245	1	0.0322	0.3873	5	25	ACTA1,LYVE1,TNNT1,GATA5,KRT19
Pubmed	20536507	Independent predictive roles of eotaxin Ala23Thr, paraoxonase 2 Ser311Cys and beta-adrenergic receptor Trp64Arg polymorphisms on cardiac disease in Type 2 Diabetes--an 8-year prospective cohort analysis of 1297 patients.	Pubmed	0.0002489	1	0.0322	0.3873	7	54	CCL11,SELE,APOB,APOE,GNB3,NPPA,IL6
Pubmed	19243017	Novel features of boundary cap cells revealed by the analysis of newly identified molecular markers.	Pubmed	0.0002489	1	0.0322	0.3873	7	54	PROM1,TMEM178B,NPR3,RUNX2,HEY2,CTHRC1,PTPRR
Pubmed	27689697	Mtu1-Mediated Thiouridine Formation of Mitochondrial tRNAs Is Required for Mitochondrial Translation and Is Involved in Reversible Infantile Liver Injury.	Pubmed	0.0002551	1	0.0322	0.3873	9	90	ACACB,MGST3,AOX1,APOE,HMGCL,HMGCS2,CPT1A,PTGS1,PTGS2
Pubmed	16189514	Towards a proteome-scale map of the human protein-protein interaction network.	Pubmed	0.0002599	1	0.0322	0.3873	59	1573	CNKSR1,MNS1,SNAPC5,FASN,HOOK1,FOXS1,SORBS2,PHLDA1,BIRC3,C7orf50,DNPH1,CCDC197,ARHGAP1,NT5C2,DLK2,RASL11B,TRAPPC2L,DOK5,GNMT,LSM3,SOCS2,H2AW,GADD45G,PPIL3,TCEA2,TUBA3D,TRIM41,CAPN3,DEPP1,RALYL,BORCS8,PCNX4,HEY2,HAAO,FAM124A,COX7A2L,TNNT1,PCBD1,TPM3,SDSL,DDAH2,TRIP13,UBB,RAB33A,MYOZ1,TNFAIP8,HSPA2,TRAPPC6A,MEAF6,ISG15,MAP3K7CL,GADD45A,KCNMB1,TSC22D3,KRT19,RENBP,APIP,HSD17B14,SNX22
Pubmed	29031500	Transcription and Signaling Regulators in Developing Neuronal Subtypes of Mouse and Human Enteric Nervous System.	Pubmed	0.000263	1	0.0322	0.3873	16	248	ERBB3,MDK,FGF10,ARNTL,CSPG5,BMP5,BMP7,NGFR,CUX2,TGFB2,TGFB3,GDF6,CCN2,LBH,TBX20,LEF1
Pubmed	27503909	Gsk3? and Tomm20 are substrates of the SCFFbxo7/PARK15 ubiquitin ligase associated with Parkinson's disease.	Pubmed	0.0002664	1	0.0322	0.3873	24	463	ATAT1,MDK,S100A13,FASN,TC2N,C1orf105,CXCL9,FGF10,LRRC8E,FMOD,SLC25A5,PHLDA1,CHCHD6,ERICH2,SMOC2,PDE4D,HMGB2,HMGCS2,UBB,LETMD1,CLIP3,SPATA4,MIR1-1HG-AS1,RORB
Pubmed	21931791	Defining the molecular character of the developing and adult kidney podocyte.	Pubmed	0.0002665	1	0.0322	0.3873	6	39	GADD45B,NES,GADD45G,NPR3,ARHGAP24,GADD45A
Pubmed	25814554	Phospho-tyrosine dependent protein-protein interaction network.	Pubmed	0.000295	1	0.0322	0.3873	22	410	RIN3,FGF12,C1QTNF3,SETD9,UQCC2,CCDC74A,DOK5,STK26,FRS3,ARID5A,DOK7,SOCS3,GRB7,GRB14,SH2D2A,LEFTY2,SERPINA5,PLEKHB1,MYOZ1,LETMD1,VSTM2L,SHE
Pubmed	29853617	Bmp2 and Notch cooperate to pattern the embryonic endocardium.	Pubmed	0.0002976	1	0.0322	0.3873	5	26	MYL2,NPPA,TGFB2,HEY2,TBX20
Pubmed	25810530	The Wnt effector transcription factor 7-like 2 positively regulates oligodendrocyte differentiation in a manner independent of Wnt/?-catenin signaling.	Pubmed	0.0002976	1	0.0322	0.3873	5	26	MBP,CCND1,PDGFRA,PLP1,LEF1
Pubmed	25082703	Modeling digits. Digit patterning is controlled by a Bmp-Sox9-Wnt Turing network modulated by morphogen gradients.	Pubmed	0.0002976	1	0.0322	0.3873	5	26	ETV4,BMP7,SHISA2,TGFB2,LEF1
Pubmed	26416771	Maternal bile acid transporter deficiency promotes neonatal demise.	Pubmed	0.0003131	1	0.0322	0.3873	7	56	FGFR4,FOSB,ABCB1,SLCO4A1,PTGS2,NR4A3,LDHA
Pubmed	20468060	Genetic pathway-based hierarchical clustering analysis of older adults with cognitive complaints and amnestic mild cognitive impairment using clinical and neuroimaging phenotypes.	Pubmed	0.0003257	1	0.0322	0.3873	4	15	APOE,BCL2,ABCB1,IL6
Pubmed	17804598	Long form of latent TGF-beta binding protein 1 (Ltbp1L) is essential for cardiac outflow tract septation and remodeling.	Pubmed	0.0003257	1	0.0322	0.3873	4	15	TGFB2,TGFB3,CCN2,LTBP1
Pubmed	24115331	Pax6 mediates ß-catenin signaling for self-renewal and neurogenesis by neocortical radial glial stem cells.	Pubmed	0.0003257	1	0.0322	0.3873	4	15	MBP,NES,CCN2,RELN
Pubmed	12183685	Quantitative trait loci affecting initial sensitivity and acute functional tolerance to ethanol-induced ataxia and brain cAMP signaling in BXD recombinant inbred mice.	Pubmed	0.0003257	1	0.0322	0.3873	4	15	ADCY1,CAMK2B,TGFA,TYRP1
Pubmed	26472242	Muscleblind-like 1 is required for normal heart valve development in vivo.	Pubmed	0.0003257	1	0.0322	0.3873	4	15	BGN,TGFB2,TGFB3,TYRP1
Pubmed	16247769	Expression and functional analysis of genes deregulated in mouse placental overgrowth models: Car2 and Ncam1.	Pubmed	0.0003257	1	0.0322	0.3873	4	15	SLC25A5,GATM,CA3,SH3KBP1
Pubmed	30606613	Developmental Heterogeneity of Microglia and Brain Myeloid Cells Revealed by Deep Single-Cell RNA Sequencing.	Pubmed	0.0003257	1	0.0322	0.3873	4	15	MBP,GPNMB,APOE,PDGFRA
Pubmed	12490199	Neurogenin3 participates in gliogenesis in the developing vertebrate spinal cord.	Pubmed	0.0003257	1	0.0322	0.3873	4	15	MAP2,MBP,PDGFRA,PLP1
Pubmed	15226263	Cardiac outflow tract defects in mice lacking ALK2 in neural crest cells.	Pubmed	0.0003257	1	0.0322	0.3873	4	15	BMP5,BMP7,TGFB2,TGFB3
Pubmed	11341749	Candidate gene polymorphisms in cardiovascular disease: a comparative study of frequencies between a French and an Italian population.	Pubmed	0.0003257	1	0.0322	0.3873	4	15	F5,SELE,APOB,APOE
Pubmed	31260032	Identification of Genes With Enriched Expression in Early Developing Mouse Cone Photoreceptors.	Pubmed	0.0003257	1	0.0322	0.3873	4	15	CDHR1,MFAP4,CADM3,LYPD1
Pubmed	9481670	Adjacent asparagines in the NR2-subunit of the NMDA receptor channel control the voltage-dependent block by extracellular Mg2+.	Pubmed	0.0003257	1	0.0322	0.3873	4	15	ACTN2,CAMK2B,GRIA3,GRIN2A
Pubmed	18448675	Cardiac developmental defects and eccentric right ventricular hypertrophy in cardiomyocyte focal adhesion kinase (FAK) conditional knockout mice.	Pubmed	0.0003257	1	0.0322	0.3873	4	15	ACTA1,MYL2,NPPA,GATA5
Pubmed	22090424	DelK32-lamin A/C has abnormal location and induces incomplete tissue maturation and severe metabolic defects leading to premature death.	Pubmed	0.0003257	1	0.0322	0.3873	4	15	ACACB,MYH6,NPPA,MYL7
Pubmed	24469813	Genetic dissection of plexin signaling in vivo.	Pubmed	0.0003257	1	0.0322	0.3873	4	15	MAP2,RRAS,NES,RELN
Pubmed	24650916	Cardiogenic genes expressed in cardiac fibroblasts contribute to heart development and repair.	Pubmed	0.0003257	1	0.0322	0.3873	4	15	MYH6,THY1,GATA5,TBX20
Pubmed	15459098	Tbx2 is essential for patterning the atrioventricular canal and for morphogenesis of the outflow tract during heart development.	Pubmed	0.0003257	1	0.0322	0.3873	4	15	FGF10,MYL2,NPPA,MYL7
Pubmed	28195173	Foxa2 identifies a cardiac progenitor population with ventricular differentiation potential.	Pubmed	0.0003257	1	0.0322	0.3873	4	15	MYL2,THY1,PDGFRA,HCN4
Pubmed	16341674	Transcriptome analysis of human gastric cancer.	Pubmed	0.00034	1	0.0322	0.3873	34	770	ERBB3,MDK,S100A13,GPNMB,FHL2,PSMG4,C7orf50,DNPH1,STXBP6,AZGP1,LOC101927974,TMEM126B,FRS3,CCND1,C12orf57,ADAP1,C19orf48,DMC1,SH3D19,HMGB2,DERL3,MEAF6,SNHG18,G0S2,SPATA20,PHF19,SLCO4A1,ZFAS1,KCNC4,TXNL4B,RHNO1,RAP1GAP,RARRES1,FARP1
Pubmed	19479237	Phenotype-genotype interactions on renal function in type 2 diabetes: an analysis using structural equation modelling.	Pubmed	0.0003499	1	0.0322	0.3873	7	57	CCL11,SELE,APOB,APOE,GNB3,NPPA,IL6
Pubmed	21768366	Genetic analysis of specific and redundant roles for p38alpha and p38beta MAPKs during mouse development.	Pubmed	0.0003582	1	0.0322	0.3873	5	27	MYH6,MYL2,CCND1,NPPA,GATA5
Pubmed	16385451	A scan of chromosome 10 identifies a novel locus showing strong association with late-onset Alzheimer disease.	Pubmed	0.0003596	1	0.0322	0.3873	22	416	CDHR1,SYNPO2L,KCNIP2,SORCS1,INPP5F,ZNF365,NT5C2,OGDHL,GRK5,PYROXD2,DEPP1,PCBD1,MAP3K8,ITPRIP,HTRA1,IDI2,AKR1C1,RHOBTB1,PCDH15,SLC16A9,ARMC4,PLCE1
Pubmed	20406964	Risk of meningioma and common variation in genes related to innate immunity.	Pubmed	0.0003891	1	0.0322	0.3873	14	207	MBP,F5,FCER1A,CCL2,CCL11,SELE,ADAM19,SOCS2,C3,C6,C7,ADAP1,SOCS3,MASP1
Pubmed	24623722	Systematic identification of pathological lamin A interactors.	Pubmed	0.0004075	1	0.0322	0.3873	19	337	TMEM74,CLEC1A,FCER1A,MGST3,TMEM42,NKG7,TCEA2,TFRC,COX14,HMOX1,HMOX2,NALCN,FXYD3,PLP1,SLC30A2,AQP10,RHAG,ORMDL3,TMEM140
Pubmed	19423540	Common variation in genes related to innate immunity and risk of adult glioma.	Pubmed	0.0004084	1	0.0322	0.3873	14	208	MBP,F5,FCER1A,CCL2,CCL11,SELE,ADAM19,SOCS2,C3,C6,C7,ADAP1,SOCS3,MASP1
Pubmed	9016303	Glutamate receptors in cortical plasticity: molecular and cellular biology.	Pubmed	0.0004116	1	0.0322	0.3873	3	7	GRIA3,GRIK2,GRIK3
Pubmed	17875669	The prepattern transcription factor Irx3 directs nephron segment identity.	Pubmed	0.0004116	1	0.0322	0.3873	3	7	IRX6,IRX1,IRX2
Pubmed	9786991	Neuronal differentiation of precursors in the neocortical ventricular zone is triggered by BMP.	Pubmed	0.0004116	1	0.0322	0.3873	3	7	BMP5,BMP7,GDF6
Pubmed	22308401	YAP1, the nuclear target of Hippo signaling, stimulates heart growth through cardiomyocyte proliferation but not hypertrophy.	Pubmed	0.0004116	1	0.0322	0.3873	3	7	MYL2,TNNI3,MYL7
Pubmed	11498536	Oligomerization of human Gadd45a protein.	Pubmed	0.0004116	1	0.0322	0.3873	3	7	GADD45B,GADD45G,GADD45A
Pubmed	15308783	Proinflammatory genetic profiles in subjects with history of ischemic stroke.	Pubmed	0.0004116	1	0.0322	0.3873	3	7	CCL2,SELE,IL6
Pubmed	20056442	Association of the 98T ELAM-1 polymorphism with increased bleeding after cardiac surgery.	Pubmed	0.0004116	1	0.0322	0.3873	3	7	SELE,IL1RN,IL6
Pubmed	10848613	Developmental expression of latent transforming growth factor beta binding protein 2 and its requirement early in mouse development.	Pubmed	0.0004116	1	0.0322	0.3873	3	7	TGFB2,TGFB3,LTBP2
Pubmed	17634193	Inhibition of Tgf beta signaling by endogenous retinoic acid is essential for primary lung bud induction.	Pubmed	0.0004116	1	0.0322	0.3873	3	7	FGF10,TGFB2,TGFB3
Pubmed	20352049	Differential expression of the circadian clock in maternal and embryonic tissues of mice.	Pubmed	0.0004116	1	0.0322	0.3873	3	7	ARNTL,PER2,DBP
Pubmed	9344848	Cloning and characterization of novel CIS family genes.	Pubmed	0.0004116	1	0.0322	0.3873	3	7	SOCS2,SOCS3,JAK2
Pubmed	10374907	Janus kinases and their role in growth and disease.	Pubmed	0.0004116	1	0.0322	0.3873	3	7	SOCS2,SOCS3,JAK2
Pubmed	10973963	Identification of a functional domain in a GADD45-mediated G2/M checkpoint.	Pubmed	0.0004116	1	0.0322	0.3873	3	7	GADD45B,GADD45G,GADD45A
Pubmed	13877379	A chemically-induced variegated-type position effect in the mouse.	Pubmed	0.0004116	1	0.0322	0.3873	3	7	ASIP,BMP5,TYRP1
Pubmed	9004034	Differentiation and integrity of cardiac muscle cells are impaired in the absence of beta 1 integrin.	Pubmed	0.0004116	1	0.0322	0.3873	3	7	MYH6,MYL2,NPPA
Pubmed	20450826	Clock gene expression in gravid uterus and extra-embryonic tissues during late gestation in the mouse.	Pubmed	0.0004116	1	0.0322	0.3873	3	7	ARNTL,PER2,DBP
Pubmed	27333774	Sphingosine 1-phosphate receptor-1 in cardiomyocytes is required for normal cardiac development.	Pubmed	0.0004116	1	0.0322	0.3873	3	7	ACTN2,NPPA,MYL7
Pubmed	10196137	Interaction of heterotrimeric G protein Galphao with Purkinje cell protein-2. Evidence for a novel nucleotide exchange factor.	Pubmed	0.0004116	1	0.0322	0.3873	3	7	GPSM2,PTPRU,LDHA
Pubmed	20861866	Genome-wide association identifies SKIV2L and MYRIP as protective factors for age-related macular degeneration.	Pubmed	0.0004116	1	0.0322	0.3873	3	7	ARMS2,C3,HTRA1
Pubmed	18519586	Deletion of vascular endothelial growth factor C (VEGF-C) and VEGF-D is not equivalent to VEGF receptor 3 deletion in mouse embryos.	Pubmed	0.0004116	1	0.0322	0.3873	3	7	VEGFD,LYVE1,KRT19
Pubmed	23303681	Effects of TGFbeta2 on wild-type and Tgfbr3 knockout mouse fetal testis.	Pubmed	0.0004116	1	0.0322	0.3873	3	7	TGFB2,TGFB3,TGFBR3
Pubmed	22766235	Different expression patterns of Phactr family members in normal and injured mouse brain.	Pubmed	0.0004116	1	0.0322	0.3873	3	7	PHACTR1,NES,PHACTR3
Pubmed	23583582	Cyclin dependent kinase 5 is required for the normal development of oligodendrocytes and myelin formation.	Pubmed	0.0004116	1	0.0322	0.3873	3	7	MBP,PDGFRA,PLP1
Pubmed	15107502	Phactrs 1-4: A family of protein phosphatase 1 and actin regulatory proteins.	Pubmed	0.0004116	1	0.0322	0.3873	3	7	ACTA1,PHACTR1,PHACTR3
Pubmed	23546644	Analysis of the molecular pathophysiology of sleep disorders relevant to a disturbed biological clock.	Pubmed	0.0004116	1	0.0322	0.3873	3	7	ARNTL,PER3,PER2
Pubmed	27532821	The Dual-specificity phosphatase Dusp15 is regulated by Sox10 and Myrf in Myelinating Oligodendrocytes.	Pubmed	0.0004116	1	0.0322	0.3873	3	7	MBP,PLP1,DUSP15
Pubmed	19326473	Natriuretic peptide system gene variants are associated with ventricular dysfunction after coronary artery bypass grafting.	Pubmed	0.0004116	1	0.0322	0.3873	3	7	CORIN,NPPA,NPR3
Pubmed	14679171	Epithelial-mesenchymal transition and its implications for fibrosis.	Pubmed	0.0004116	1	0.0322	0.3873	3	7	BMP7,TGFB2,TGFB3
Pubmed	11782400	Role of FGF10/FGFR2b signaling during mammary gland development in the mouse embryo.	Pubmed	0.0004116	1	0.0322	0.3873	3	7	FGF7,FGF10,LEF1
Pubmed	18816849	Fgf16 is required for cardiomyocyte proliferation in the mouse embryonic heart.	Pubmed	0.0004116	1	0.0322	0.3873	3	7	MYH6,MYL2,NPPA
Pubmed	9651535	Glutamate receptors: brain function and signal transduction.	Pubmed	0.0004116	1	0.0322	0.3873	3	7	GRIA3,GRIK2,GRIK3
Pubmed	9748265	Sequence characteristics, subcellular localization, and substrate specificity of DYRK-related kinases, a novel family of dual specificity protein kinases.	Pubmed	0.0004116	1	0.0322	0.3873	3	7	H2BC21,DYRK4,DYRK1B
Pubmed	24760528	Vitamin D deficiency causes airway hyperresponsiveness, increases airway smooth muscle mass, and reduces TGF-? expression in the lungs of female BALB/c mice.	Pubmed	0.0004116	1	0.0322	0.3873	3	7	TGFB2,TGFB3,TGFBR3
Pubmed	21285316	Impairment of peripheral circadian clocks precedes metabolic abnormalities in ob/ob mice.	Pubmed	0.0004116	1	0.0322	0.3873	3	7	ARNTL,PER2,DBP
Pubmed	8863127	Distribution of a reeler gene-related antigen in the developing cerebellum: an immunohistochemical study with an allogeneic antibody CR-50 on normal and reeler mice.	Pubmed	0.0004116	1	0.0322	0.3873	3	7	MAP2,NES,RELN
Pubmed	11731698	Embryonic submandibular gland morphogenesis: stage-specific protein localization of FGFs, BMPs, Pax6 and Pax9 in normal mice and abnormal SMG phenotypes in FgfR2-IIIc(+/Delta), BMP7(-/-) and Pax6(-/-) mice.	Pubmed	0.0004263	1	0.0322	0.3873	4	16	FGF7,FGF10,FGFR4,BMP7
Pubmed	20643125	Enlarged lateral ventricles and aberrant behavior in mice overexpressing PDGF-B in embryonic neural stem cells.	Pubmed	0.0004263	1	0.0322	0.3873	4	16	MAP2,NES,PROM1,PDGFRA
Pubmed	20466812	MicroRNA-140 plays dual roles in both cartilage development and homeostasis.	Pubmed	0.0004263	1	0.0322	0.3873	4	16	ADAMTS5,COL9A1,ADAMTS4,ASPN
Pubmed	30466882	Early Correction of N-Methyl-D-Aspartate Receptor Function Improves Autistic-like Social Behaviors in Adult Shank2	Pubmed	0.0004263	1	0.0322	0.3873	4	16	CAMK2B,GRIN2A,GRM1,GRIN3A
Pubmed	24145799	Genetic rescue of Muenke syndrome model hearing loss reveals prolonged FGF-dependent plasticity in cochlear supporting cell fates.	Pubmed	0.0004263	1	0.0322	0.3873	4	16	ETV4,FGF10,NGFR,HEY2
Pubmed	16124007	Slow and fast fiber isoform gene expression is systematically altered in skeletal muscle of the Sox6 mutant, p100H.	Pubmed	0.0004263	1	0.0322	0.3873	4	16	ACTA1,ATP2A2,MYL2,TNNT1
Pubmed	19693801	PER2 variantion is associated with depression vulnerability.	Pubmed	0.0004263	1	0.0322	0.3873	4	16	ARNTL,PER3,PER2,DBP
Pubmed	9445485	Comparative sequence analysis of a gene-rich cluster at human chromosome 12p13 and its syntenic region in mouse chromosome 6.	Pubmed	0.0004263	1	0.0322	0.3873	4	16	P3H3,C12orf57,GNB3,LPCAT3
Pubmed	18628400	Transcriptional coactivators PGC-1alpha and PGC-lbeta control overlapping programs required for perinatal maturation of the heart.	Pubmed	0.0004263	1	0.0322	0.3873	4	16	ATP2A2,MYH6,NPPA,PDK4
Pubmed	23754746	Epigenetic functions of smchd1 repress gene clusters on the inactive X chromosome and on autosomes.	Pubmed	0.0004601	1	0.0322	0.3873	6	43	C1QTNF3,TMEM126B,EDA2R,RAB33A,SH3KBP1,TMEM163
Pubmed	21116278	Genome-wide association with MRI atrophy measures as a quantitative trait locus for Alzheimer's disease.	Pubmed	0.0004601	1	0.0322	0.3873	6	43	F13A1,SLC44A5,MGST3,BIRC3,STXBP6,FARP1
Pubmed	25336743	Arid3b is essential for second heart field cell deployment and heart patterning.	Pubmed	0.0004601	1	0.0322	0.3873	6	43	VGLL2,MYL2,NPPA,TGFB2,HEY2,TBX20
Pubmed	28705898	Cellular heterogeneity in the ureteric progenitor niche and distinct profiles of branching morphogenesis in organ development.	Pubmed	0.0004864	1	0.0322	0.3873	10	119	ETV4,MDK,SLC27A6,P3H3,NSG1,CCND1,SOCS2,CHADL,SERPINE2,STMN1
Pubmed	19423573	A protein interaction network for the large conductance Ca(2+)-activated K(+) channel in the mouse cochlea.	Pubmed	0.000489	1	0.0322	0.3873	11	141	MBP,MGST1,APOE,CADM3,DDAH1,UCHL1,HSPA2,AIF1L,METTL7B,STMN1,LDHA
Pubmed	30635555	Single-cell transcriptomic analysis of mouse neocortical development.	Pubmed	0.0004938	1	0.0322	0.3873	12	164	MFAP4,SYT13,AQP4,DOK5,NES,PDGFRA,PENK,CRYM,RELN,HTRA1,KCNJ8,GRIN3A
Pubmed	15525990	Baf60c is essential for function of BAF chromatin remodelling complexes in heart development.	Pubmed	0.0005071	1	0.0322	0.3873	5	29	FGF10,SMARCD3,MYL2,NPPA,TBX20
Pubmed	23455636	Seven new loci associated with age-related macular degeneration.	Pubmed	0.0005071	1	0.0322	0.3873	5	29	APOE,ARMS2,C3,DDR1,HTRA1
Pubmed	23012479	Impact of lactobacilli on orally acquired listeriosis.	Pubmed	0.0005195	1	0.0322	0.3873	9	99	CXCL9,CCL2,VEGFD,C3,CA3,PENK,ISG15,PRLR,CFD
Pubmed	17322895	Hdac2 regulates the cardiac hypertrophic response by modulating Gsk3 beta activity.	Pubmed	0.0005472	1	0.0322	0.3873	4	17	ACTA1,INPP5F,MYH6,NPPA
Pubmed	20970343	Nucleoredoxin sustains Wnt/?-catenin signaling by retaining a pool of inactive dishevelled protein.	Pubmed	0.0005472	1	0.0322	0.3873	4	17	FGF10,NGFR,RUNX2,TGFB2
Pubmed	24850809	Genetic determinants of P wave duration and PR segment.	Pubmed	0.0005472	1	0.0322	0.3873	4	17	IL17D,FADS2,ARHGAP24,EXOG
Pubmed	9876177	Abrogation of the Cripto gene in mouse leads to failure of postgastrulation morphogenesis and lack of differentiation of cardiomyocytes.	Pubmed	0.0005472	1	0.0322	0.3873	4	17	MYH6,MYL2,NPPA,MYL7
Pubmed	21315259	Reelin regulates cadherin function via Dab1/Rap1 to control neuronal migration and lamination in the neocortex.	Pubmed	0.0005472	1	0.0322	0.3873	4	17	MAP2,NES,CUX2,RELN
Pubmed	21068310	BMP signaling is necessary for patterning the sensory and nonsensory regions of the developing mammalian cochlea.	Pubmed	0.0005472	1	0.0322	0.3873	4	17	FGF10,BMP5,BMP7,HEY2
Pubmed	27725084	Calcium handling precedes cardiac differentiation to initiate the first heartbeat.	Pubmed	0.0005472	1	0.0322	0.3873	4	17	ACTN2,ATP2A2,MYH6,HCN4
Pubmed	15464586	GATA4 is a dosage-sensitive regulator of cardiac morphogenesis.	Pubmed	0.0005472	1	0.0322	0.3873	4	17	MYL2,CCND1,NPPA,MYL7
Pubmed	18927546	Lp(a) and risk of recurrent cardiac events in obese postinfarction patients.	Pubmed	0.0005472	1	0.0322	0.3873	4	17	F13A1,APOB,APOE,IL6
Pubmed	19641107	Neuronal 3',3,5-triiodothyronine (T3) uptake and behavioral phenotype of mice deficient in Mct8, the neuronal T3 transporter mutated in Allan-Herndon-Dudley syndrome.	Pubmed	0.0005472	1	0.0322	0.3873	4	17	MAP2,SLC16A10,NGFR,SLCO4A1
Pubmed	16890158	Sprouty genes control diastema tooth development via bidirectional antagonism of epithelial-mesenchymal FGF signaling.	Pubmed	0.0005472	1	0.0322	0.3873	4	17	ETV4,FGF10,TMEM163,LEF1
Pubmed	29688375	CITGeneDB: a comprehensive database of human and mouse genes enhancing or suppressing cold-induced thermogenesis validated by perturbation experiments in mice.	Pubmed	0.0005507	1	0.0322	0.3873	11	143	MFAP2,ARRDC3,ARNTL,GADD45G,PER2,NPR3,ADAMTS5,G0S2,PRLR,JAK2,DIO2
Pubmed	22758658	COX-2 mRNA is increased in oesophageal mucosal cells by a proton pump inhibitor.	Pubmed	0.0005557	1	0.0322	0.3873	2	2	PTGS1,PTGS2
Pubmed	17069755	A ubiquitin E3 ligase Efp is up-regulated by interferons and conjugated with ISG15.	Pubmed	0.0005557	1	0.0322	0.3873	2	2	ISG15,TRIM25
Pubmed	18026953	Coinheritance of the different copy numbers of alpha-globin gene modifies severity of beta-thalassemia/Hb E disease.	Pubmed	0.0005557	1	0.0322	0.3873	2	2	HBA2,HBB
Pubmed	30369484	Association of ADAMTS4 and ADAMTS5 polymorphisms with musculoskeletal degenerative diseases: a systematic review and meta-analysis.	Pubmed	0.0005557	1	0.0322	0.3873	2	2	ADAMTS5,ADAMTS4
Pubmed	23590659	Diagnostic testing for ?-globin gene disorders in a heterogeneous North American population.	Pubmed	0.0005557	1	0.0322	0.3873	2	2	HBA1,HBA2
Pubmed	16150050	Cyclooxygenase-1 haplotype modulates platelet response to aspirin.	Pubmed	0.0005557	1	0.0322	0.3873	2	2	PTGS1,PTGS2
Pubmed	1975428	A truncated human chromosome 16 associated with alpha thalassaemia is stabilized by addition of telomeric repeat (TTAGGG)n.	Pubmed	0.0005557	1	0.0322	0.3873	2	2	HBA1,HBA2
Pubmed	12591723	Abnormal interleukin 10Ralpha expression contributes to the maintenance of elevated cyclooxygenase-2 in non-small cell lung cancer cells.	Pubmed	0.0005557	1	0.0322	0.3873	2	2	IL10RA,PTGS2
Pubmed	27503167	Development of myotendinous-like junctions that anchor cardiac valves requires fibromodulin and lumican.	Pubmed	0.0005557	1	0.0322	0.3873	2	2	FMOD,LUM
Pubmed	6452630	Cloning and complete nucleotide sequence of human 5'-alpha-globin gene.	Pubmed	0.0005557	1	0.0322	0.3873	2	2	HBA1,HBA2
Pubmed	17310346	Interleukin-6 directly influences proliferation and invasion potential of head and neck cancer cells.	Pubmed	0.0005557	1	0.0322	0.3873	2	2	IL6,IL6R
Pubmed	26316481	The Hematological and Molecular Spectrum of ?-Thalassemias in Turkey: The Hacettepe Experience.	Pubmed	0.0005557	1	0.0322	0.3873	2	2	HBA1,HBA2
Pubmed	21075281	Protein quality control during erythropoiesis and hemoglobin synthesis.	Pubmed	0.0005557	1	0.0322	0.3873	2	2	HBA1,HBB
Pubmed	27620974	APOE and KIBRA Interactions on Brain Functional Connectivity in Healthy Young Adults.	Pubmed	0.0005557	1	0.0322	0.3873	2	2	APOE,WWC1
Pubmed	23536693	Mycoplasma fermentans MALP-2 induces heme oxygenase-1 expression via mitogen-activated protein kinases and Nrf2 pathways to modulate cyclooxygenase 2 expression in human monocytes.	Pubmed	0.0005557	1	0.0322	0.3873	2	2	HMOX1,PTGS2
Pubmed	24022467	COX-1 (PTGS1) and COX-2 (PTGS2) polymorphisms, NSAID interactions, and risk of colon and rectal cancers in two independent populations.	Pubmed	0.0005557	1	0.0322	0.3873	2	2	PTGS1,PTGS2
Pubmed	17394396	Molecular analysis of alpha/beta-thalassemia in a southern Chinese population.	Pubmed	0.0005557	1	0.0322	0.3873	2	2	HBA1,HBB
Pubmed	21903937	Phosphodiesterase 4D regulates baseline sarcoplasmic reticulum Ca2+ release and cardiac contractility, independently of L-type Ca2+ current.	Pubmed	0.0005557	1	0.0322	0.3873	2	2	ATP2A2,PDE4D
Pubmed	19833730	Structural characterization of mouse neutrophil serine proteases and identification of their substrate specificities: relevance to mouse models of human inflammatory diseases.	Pubmed	0.0005557	1	0.0322	0.3873	2	2	CTSG,ELANE
Pubmed	28432083	Optimal CD4 T cell priming after LPS-based adjuvanticity with CD134 costimulation relies on CXCL9 production.	Pubmed	0.0005557	1	0.0322	0.3873	2	2	CXCL9,TNFRSF4
Pubmed	24728031	Functional FCGR3A 158 V/F and IL-6 -174 C/G polymorphisms predict response to biologic therapy in patients with rheumatoid arthritis: a meta-analysis.	Pubmed	0.0005557	1	0.0322	0.3873	2	2	FCGR3A,IL6
Pubmed	23891883	High resolution whole brain imaging of anatomical variation in XO, XX, and XY mice.	Pubmed	0.0005557	1	0.0322	0.3873	2	2	ASIP,EDA
Pubmed	22738435	Identification and characterization of two novel and differentially expressed isoforms of human ?2- and ?1-globin genes.	Pubmed	0.0005557	1	0.0322	0.3873	2	2	HBA1,HBA2
Pubmed	16787386	Zymosan-induced glycerylprostaglandin and prostaglandin synthesis in resident peritoneal macrophages: roles of cyclo-oxygenase-1 and -2.	Pubmed	0.0005557	1	0.0322	0.3873	2	2	PTGS1,PTGS2
Pubmed	15263079	Acetaminophen-induced hypothermia in mice is mediated by a prostaglandin endoperoxide synthase 1 gene-derived protein.	Pubmed	0.0005557	1	0.0322	0.3873	2	2	PTGS1,PTGS2
Pubmed	10728394	Expression of secreted frizzled related proteins 3 and 4 in human ventricular myocardium correlates with apoptosis related gene expression.	Pubmed	0.0005557	1	0.0322	0.3873	2	2	SFRP4,FRZB
Pubmed	22559824	Expression of heme oxygenase in the eutopic and ectopic endometrium in patients with adenomyosis.	Pubmed	0.0005557	1	0.0322	0.3873	2	2	HMOX1,HMOX2
Pubmed	12496842	Characterization of the FGF axis and identification of a novel FGFR1iiic isoform during prostate cancer progression in the TRAMP model.	Pubmed	0.0005557	1	0.0322	0.3873	2	2	FGF7,FGF10
Pubmed	1375903	Expression of transforming growth factor-beta isoforms (beta 2 and beta 3) in the mouse uterus: analysis of the periimplantation period and effects of ovarian steroids.	Pubmed	0.0005557	1	0.0322	0.3873	2	2	TGFB2,TGFB3
Pubmed	15017020	Atrial natriuretic peptide gene polymorphisms and risk of ischemic stroke in humans.	Pubmed	0.0005557	1	0.0322	0.3873	2	2	NPPA,NPR3
Pubmed	30809313	Monoclonal Antibody against CXCL1 (HL2401) as a Novel Agent in Suppressing IL6 Expression and Tumoral Growth.	Pubmed	0.0005557	1	0.0322	0.3873	2	2	CXCL1,IL6
Pubmed	11076963	Differential expression of lumican and fibromodulin regulate collagen fibrillogenesis in developing mouse tendons.	Pubmed	0.0005557	1	0.0322	0.3873	2	2	FMOD,LUM
Pubmed	29109438	VSIG4 inhibits proinflammatory macrophage activation by reprogramming mitochondrial pyruvate metabolism.	Pubmed	0.0005557	1	0.0322	0.3873	2	2	C3,VSIG4
Pubmed	12089156	A syndrome of joint laxity and impaired tendon integrity in lumican- and fibromodulin-deficient mice.	Pubmed	0.0005557	1	0.0322	0.3873	2	2	FMOD,LUM
Pubmed	19261853	Membrane-associated farnesylated UCH-L1 promotes alpha-synuclein neurotoxicity and is a therapeutic target for Parkinson's disease.	Pubmed	0.0005557	1	0.0322	0.3873	2	2	SNCA,UCHL1
Pubmed	12748876	The clinical role of interleukin-6 and interleukin-6 soluble receptor in human follicular fluids.	Pubmed	0.0005557	1	0.0322	0.3873	2	2	IL6,IL6R
Pubmed	11409167	Assessment of protein gene product 9.5 as a marker of neural crest-derived precursor cells in the developing enteric nervous system.	Pubmed	0.0005557	1	0.0322	0.3873	2	2	NGFR,UCHL1
Pubmed	21047676	Phosphodiesterase 4B is essential for T(H)2-cell function and development of airway hyperresponsiveness in allergic asthma.	Pubmed	0.0005557	1	0.0322	0.3873	2	2	PDE4A,PDE4B
Pubmed	16170381	Hematopoietic cells from Gadd45a- and Gadd45b-deficient mice are sensitized to genotoxic-stress-induced apoptosis.	Pubmed	0.0005557	1	0.0322	0.3873	2	2	GADD45B,GADD45A
Pubmed	12665558	Isolation of hepatoblasts based on the expression of Dlk/Pref-1.	Pubmed	0.0005557	1	0.0322	0.3873	2	2	DLK1,KRT19
Pubmed	9362331	Cyclooxygenase-2 is expressed in bladder during fetal development and stimulated by outlet obstruction.	Pubmed	0.0005557	1	0.0322	0.3873	2	2	PTGS1,PTGS2
Pubmed	24904279	The sodium leak channel, NALCN, in health and disease.	Pubmed	0.0005557	1	0.0322	0.3873	2	2	UNC80,NALCN
Pubmed	27076484	The Association Between Clusterin and APOE Polymorphisms and Late-Onset Alzheimer Disease in a Turkish Cohort.	Pubmed	0.0005557	1	0.0322	0.3873	2	2	APOE,CLU
Pubmed	10691782	Intracellular localization of dimethylarginine dimethylaminohydrolase overexpressed in an endothelial cell line.	Pubmed	0.0005557	1	0.0322	0.3873	2	2	DDAH2,DDAH1
Pubmed	21952825	Characterization of splice variants of the genes encoding human mitochondrial HMG-CoA lyase and HMG-CoA synthase, the main enzymes of the ketogenesis pathway.	Pubmed	0.0005557	1	0.0322	0.3873	2	2	HMGCL,HMGCS2
Pubmed	23073173	Bicalutamide-induced hypoxia potentiates RUNX2-mediated Bcl-2 expression resulting in apoptosis resistance.	Pubmed	0.0005557	1	0.0322	0.3873	2	2	BCL2,RUNX2
Pubmed	16636063	Gadd45a and Gadd45b protect hematopoietic cells from UV-induced apoptosis via distinct signaling pathways, including p38 activation and JNK inhibition.	Pubmed	0.0005557	1	0.0322	0.3873	2	2	GADD45B,GADD45A
Pubmed	12478370	Tgfbeta2 -/- Tgfbeta3 -/- double knockout mice display severe midline fusion defects and early embryonic lethality.	Pubmed	0.0005557	1	0.0322	0.3873	2	2	TGFB2,TGFB3
Pubmed	9332392	Cloning of mouse FGF10 and up-regulation of its gene expression during wound healing.	Pubmed	0.0005557	1	0.0322	0.3873	2	2	FGF7,FGF10
Pubmed	16508779	High glucose alters the expression of genes involved in proliferation and cell-fate specification of embryonic neural stem cells.	Pubmed	0.0005557	1	0.0322	0.3873	2	2	MAP2,NES
Pubmed	12901521	The influence of apolipoprotein B and E gene polymorphisms on the response to simvastatin therapy in patients with hyperlipidemia.	Pubmed	0.0005557	1	0.0322	0.3873	2	2	APOB,APOE
Pubmed	29168665	The clinicopathological parameters significance of CD133 and Nestin in epithelial ovarian cancer: a meta-analysis.	Pubmed	0.0005557	1	0.0322	0.3873	2	2	NES,PROM1
Pubmed	25645360	The Effect of Cadmium on COX-1 and COX-2 Gene, Protein Expression, and Enzymatic Activity in THP-1 Macrophages.	Pubmed	0.0005557	1	0.0322	0.3873	2	2	PTGS1,PTGS2
Pubmed	19887674	The contribution of cyclooxygenase-1 and -2 to persistent thromboxane biosynthesis in aspirin-treated essential thrombocythemia: implications for antiplatelet therapy.	Pubmed	0.0005557	1	0.0322	0.3873	2	2	PTGS1,PTGS2
Pubmed	25799324	Depression-associated ARNTL and PER2 genetic variants in psychotic disorders.	Pubmed	0.0005557	1	0.0322	0.3873	2	2	ARNTL,PER2
Pubmed	25149102	Cyclooxygenase-2-dependent oxidative stress mediates palmitate-induced impairment of endothelium-dependent relaxations in mouse arteries.	Pubmed	0.0005557	1	0.0322	0.3873	2	2	PTGS1,PTGS2
Pubmed	11106625	Alteration of tropomyosin function and folding by a nemaline myopathy-causing mutation.	Pubmed	0.0005557	1	0.0322	0.3873	2	2	ACTA1,TPM3
Pubmed	19205707	Genetic polymorphisms in the cyclooxygenase-1 and cyclooxygenase-2 genes and risk of colorectal adenoma.	Pubmed	0.0005557	1	0.0322	0.3873	2	2	PTGS1,PTGS2
Pubmed	23392112	Elevated SOCS3 and altered IL-6 signaling is associated with age-related human muscle stem cell dysfunction.	Pubmed	0.0005557	1	0.0322	0.3873	2	2	SOCS3,IL6
Pubmed	25261684	Protease activated receptor-1 mediates cytotoxicity during ischemia using in vivo and in vitro models.	Pubmed	0.0005557	1	0.0322	0.3873	2	2	F2R,F2RL2
Pubmed	12070165	Identification of the proteoglycan binding site in apolipoprotein B48.	Pubmed	0.0005557	1	0.0322	0.3873	2	2	APOB,BGN
Pubmed	26926165	A PTH-responsive circadian clock operates in ex vivo mouse femur fracture healing site.	Pubmed	0.0005557	1	0.0322	0.3873	2	2	ARNTL,PER2
Pubmed	22761857	Satellite cells derived from obese humans with type 2 diabetes and differentiated into myocytes in vitro exhibit abnormal response to IL-6.	Pubmed	0.0005557	1	0.0322	0.3873	2	2	IL6,IL6R
Pubmed	15319356	Estrogen up-regulates hepatic expression of suppressors of cytokine signaling-2 and -3 in vivo and in vitro.	Pubmed	0.0005557	1	0.0322	0.3873	2	2	SOCS2,SOCS3
Pubmed	19688743	Gadd45b and Gadd45g are important for anti-tumor immune responses.	Pubmed	0.0005557	1	0.0322	0.3873	2	2	GADD45B,GADD45G
Pubmed	17898129	Interleukin-6 receptor gene variations, plasma interleukin-6 levels, and type 2 diabetes in U.S. Women.	Pubmed	0.0005557	1	0.0322	0.3873	2	2	IL6,IL6R
Pubmed	12413693	Salivary cystatins induce interleukin-6 expression via cell surface molecules in human gingival fibroblasts.	Pubmed	0.0005557	1	0.0322	0.3873	2	2	CST2,IL6
Pubmed	19815520	Alpha-actinin2 cytoskeletal protein is required for the functional membrane localization of a Ca2+-activated K+ channel (SK2 channel).	Pubmed	0.0005557	1	0.0322	0.3873	2	2	ACTN2,KCNN2
Pubmed	7558001	Cloning and mapping of the U2af1-rs2 gene with a high transmission distortion in interspecific backcross progeny.	Pubmed	0.0005557	1	0.0322	0.3873	2	2	ZRSR2,PLP1
Pubmed	27046040	Phosphorylated Heat Shock Protein 20 (HSPB6) Regulates Transforming Growth Factor-?-Induced Migration and Invasion of Hepatocellular Carcinoma Cells.	Pubmed	0.0005557	1	0.0322	0.3873	2	2	TGFA,HSPB6
Pubmed	22366371	Aberrant expression of Fc?RIIIA (CD16) contributes to the development of atherosclerosis.	Pubmed	0.0005557	1	0.0322	0.3873	2	2	FCGR3A,APOE
Pubmed	23593036	Functional IL6R 358Ala allele impairs classical IL-6 receptor signaling and influences risk of diverse inflammatory diseases.	Pubmed	0.0005557	1	0.0322	0.3873	2	2	IL6,IL6R
Pubmed	23739922	Protease-activated receptors (PAR)-1 and -3 drive epithelial-mesenchymal transition of alveolar epithelial cells - potential role in lung fibrosis.	Pubmed	0.0005557	1	0.0322	0.3873	2	2	F2R,F2RL2
Pubmed	26516203	The role of adipose tissue asymmetric dimethylarginine/dimethylarginine dimethylaminohydrolase pathway in adipose tissue phenotype and metabolic abnormalities in subtotally nephrectomized rats.	Pubmed	0.0005557	1	0.0322	0.3873	2	2	DDAH2,DDAH1
Pubmed	25082878	Ser70 phosphorylation of Bcl-2 by selective tyrosine nitration of PP2A-B56? stabilizes its antiapoptotic activity.	Pubmed	0.0005557	1	0.0322	0.3873	2	2	BCL2,PPP2R2B
Pubmed	25027842	LincRNAs MONC and MIR100HG act as oncogenes in acute megakaryoblastic leukemia.	Pubmed	0.0005557	1	0.0322	0.3873	2	2	MIR100HG,MIR99AHG
Pubmed	8364540	A physical map of the C6 and C7 complement component gene region on chromosome 5p13.	Pubmed	0.0005557	1	0.0322	0.3873	2	2	C6,C7
Pubmed	20373031	Association between apolipoprotein ?4 allele, factor V Leiden, and plasma lipid and lipoprotein levels with sickle cell disease in Southern Iran.	Pubmed	0.0005557	1	0.0322	0.3873	2	2	F5,APOE
Pubmed	30229833	Suppressed CCL2 expression inhibits the proliferation of leukemia cells via the cell cycle protein Cyclin D1: preliminary in vitro data.	Pubmed	0.0005557	1	0.0322	0.3873	2	2	CCL2,CCND1
Pubmed	17548705	MIC1 and IL1RN genetic variation and advanced prostate cancer risk.	Pubmed	0.0005557	1	0.0322	0.3873	2	2	GDF15,IL1RN
Pubmed	19671870	Prognostic significance of interleukin-6 single nucleotide polymorphism genotypes in neuroblastoma: rs1800795 (promoter) and rs8192284 (receptor).	Pubmed	0.0005557	1	0.0322	0.3873	2	2	IL6,IL6R
Pubmed	24387269	Cyclooxygenase-2 and B-cell lymphoma-2 expression in cystitis glandularis and primary vesicle adenocarcinoma.	Pubmed	0.0005557	1	0.0322	0.3873	2	2	BCL2,PTGS2
Pubmed	6244294	Nucleotide sequence of the coding portion of human alpha globin messenger RNA.	Pubmed	0.0005557	1	0.0322	0.3873	2	2	HBA1,HBA2
Pubmed	27479651	The expression of P-glycoprotein in leukemia cells is associated with the upregulated expression of nestin, a class 6 filament protein.	Pubmed	0.0005557	1	0.0322	0.3873	2	2	NES,ABCB1
Pubmed	1695131	Chromosomal localization of two human genes inducible by interferons, double-stranded RNA, and viruses.	Pubmed	0.0005557	1	0.0322	0.3873	2	2	IFI6,ISG15
Pubmed	19959238	The membrane attack complex of complement drives the progression of atherosclerosis in apolipoprotein E knockout mice.	Pubmed	0.0005557	1	0.0322	0.3873	2	2	APOE,C6
Pubmed	11920472	Expression of cyclooxygenase-1 and cyclooxygenase-2 in bronchial epithelium and nonsmall cell lung carcinoma.	Pubmed	0.0005557	1	0.0322	0.3873	2	2	PTGS1,PTGS2
Pubmed	23850620	Differential COX-2 induction by viral and bacterial PAMPs: Consequences for cytokine and interferon responses and implications for anti-viral COX-2 directed therapies.	Pubmed	0.0005557	1	0.0322	0.3873	2	2	PTGS1,PTGS2
Pubmed	16189289	Expression and function of COX isoforms in renal medulla: evidence for regulation of salt sensitivity and blood pressure.	Pubmed	0.0005557	1	0.0322	0.3873	2	2	PTGS1,PTGS2
Pubmed	25721605	Cancer-mediated adipose reversion promotes cancer cell migration via IL-6 and MCP-1.	Pubmed	0.0005557	1	0.0322	0.3873	2	2	CCL2,IL6
Pubmed	26006043	Suppression of methylmercury-induced IL-6 and MCP-1 expressions by N-acetylcysteine in U-87MG human astrocytoma cells.	Pubmed	0.0005557	1	0.0322	0.3873	2	2	CCL2,IL6
Pubmed	25194333	Relationship between dimethylarginine dimethylaminohydrolase gene variants and asymmetric dimethylarginine in patients with rheumatoid arthritis.	Pubmed	0.0005557	1	0.0322	0.3873	2	2	DDAH2,DDAH1
Pubmed	27726182	The intrinsic microglial clock system regulates interleukin-6 expression.	Pubmed	0.0005557	1	0.0322	0.3873	2	2	ARNTL,IL6
Pubmed	24866382	Induction of T helper 2 responses against human apolipoprotein B100 does not affect atherosclerosis in ApoE-/- mice.	Pubmed	0.0005557	1	0.0322	0.3873	2	2	APOB,APOE
Pubmed	18769447	SOCS2: inhibitor of JAK2V617F-mediated signal transduction.	Pubmed	0.0005557	1	0.0322	0.3873	2	2	SOCS2,JAK2
Pubmed	20667498	The interleukin-6 gene -572C/G promoter polymorphism modifies Alzheimer's risk in APOE epsilon 4 carriers.	Pubmed	0.0005557	1	0.0322	0.3873	2	2	APOE,IL6
Pubmed	17325857	Overexpression of SOCS-2 and SOCS-3 genes reverses erythroid overgrowth and IGF-I hypersensitivity of primary polycythemia vera (PV) cells.	Pubmed	0.0005557	1	0.0322	0.3873	2	2	SOCS2,SOCS3
Pubmed	22609818	Genetic polymorphisms of HO-1 and COX-1 are associated with aspirin resistance defined by light transmittance aggregation in Chinese Han patients.	Pubmed	0.0005557	1	0.0322	0.3873	2	2	HMOX1,PTGS1
Pubmed	18042673	Crystal structures of the two major aggrecan degrading enzymes, ADAMTS4 and ADAMTS5.	Pubmed	0.0005557	1	0.0322	0.3873	2	2	ADAMTS5,ADAMTS4
Pubmed	25224969	Delayed cutaneous wound closure in HO-2 deficient mice despite normal HO-1 expression.	Pubmed	0.0005557	1	0.0322	0.3873	2	2	HMOX1,HMOX2
Pubmed	20967239	Emergence of noise-induced oscillations in the central circadian pacemaker.	Pubmed	0.0005557	1	0.0322	0.3873	2	2	ARNTL,PER2
Pubmed	16920729	Dimethylarginine dimethylaminohydrolase (DDAH) regulates trophoblast invasion and motility through effects on nitric oxide.	Pubmed	0.0005557	1	0.0322	0.3873	2	2	DDAH2,DDAH1
Pubmed	21321193	Interleukin 6 signaling promotes anti-aquaporin 4 autoantibody production from plasmablasts in neuromyelitis optica.	Pubmed	0.0005557	1	0.0322	0.3873	2	2	AQP4,IL6
Pubmed	22972803	Prolonged exposure to methylglyoxal causes disruption of vascular KATP channel by mRNA instability.	Pubmed	0.0005557	1	0.0322	0.3873	2	2	ABCC8,KCNJ8
Pubmed	11809691	Cyclooxygenase-1 is up-regulated in cervical carcinomas: autocrine/paracrine regulation of cyclooxygenase-2, prostaglandin e receptors, and angiogenic factors by cyclooxygenase-1.	Pubmed	0.0005557	1	0.0322	0.3873	2	2	PTGS1,PTGS2
Pubmed	16014038	MCP-1 is up-regulated in unstressed and stressed HO-1 knockout mice: Pathophysiologic correlates.	Pubmed	0.0005557	1	0.0322	0.3873	2	2	CCL2,HMOX1
Pubmed	28446616	Early immune responses are independent of RGC dysfunction in glaucoma with complement component C3 being protective.	Pubmed	0.0005557	1	0.0322	0.3873	2	2	GPNMB,C3
Pubmed	25245339	Interleukin-6, soluble interleukin-6 receptor/interleukin-6 complex and insulin resistance in obese children and adolescents.	Pubmed	0.0005557	1	0.0322	0.3873	2	2	IL6,IL6R
Pubmed	19755711	Differential interactions of FGFs with heparan sulfate control gradient formation and branching morphogenesis.	Pubmed	0.0005557	1	0.0322	0.3873	2	2	FGF7,FGF10
Pubmed	21931690	Upregulation of hemoglobin expression by oxidative stress in hepatocytes and its implication in nonalcoholic steatohepatitis.	Pubmed	0.0005557	1	0.0322	0.3873	2	2	HBA1,HBB
Pubmed	16723712	Age-dependent effect of myostatin blockade on disease severity in a murine model of limb-girdle muscular dystrophy.	Pubmed	0.0005557	1	0.0322	0.3873	2	2	SGCD,MSTN
Pubmed	27837619	Expression of Nestin and CD133 in serous ovarian carcinoma.	Pubmed	0.0005557	1	0.0322	0.3873	2	2	NES,PROM1
Pubmed	23233679	Versican processing by a disintegrin-like and metalloproteinase domain with thrombospondin-1 repeats proteinases-5 and -15 facilitates myoblast fusion.	Pubmed	0.0005557	1	0.0322	0.3873	2	2	ADAMTS15,ADAMTS5
Pubmed	9211822	Functional analysis in vivo of the double mutant mouse deficient in both proteolipid protein (PLP) and myelin basic protein (MBP) in the central nervous system.	Pubmed	0.0005557	1	0.0322	0.3873	2	2	MBP,PLP1
Pubmed	21488974	Sensor materials for the detection of human neutrophil elastase and cathepsin G activity in wound fluid.	Pubmed	0.0005557	1	0.0322	0.3873	2	2	CTSG,ELANE
Pubmed	21478098	Expression of cyclooxygenase-1 and cyclooxygenase-2 in normal and pathological human oral mucosa.	Pubmed	0.0005557	1	0.0322	0.3873	2	2	PTGS1,PTGS2
Pubmed	27856455	Map3k8 Modulates Monocyte State and Atherogenesis in ApoE-/- Mice.	Pubmed	0.0005557	1	0.0322	0.3873	2	2	APOE,MAP3K8
Pubmed	7391545	X-linked polydactyly (Xpl), a new mutation in the mouse.	Pubmed	0.0005557	1	0.0322	0.3873	2	2	PLP1,EDA
Pubmed	18853460	Common variation in GRB-associated Binding Protein 2 (GAB2) and increased risk for Alzheimer dementia.	Pubmed	0.0005557	1	0.0322	0.3873	2	2	APOE,GAB2
Pubmed	21252539	IL-6-174 G/C and ApoE gene polymorphisms in Alzheimer's and vascular dementia patients attending the cognitive disorder clinic of the All India Institute of Medical Sciences, New Delhi.	Pubmed	0.0005557	1	0.0322	0.3873	2	2	APOE,IL6
Pubmed	15837514	The design of coiled-coil structures and assemblies.	Pubmed	0.0005557	1	0.0322	0.3873	2	2	CCDC74A,CCDC168
Pubmed	27343265	Localization of corin and atrial natriuretic peptide expression in human renal segments.	Pubmed	0.0005557	1	0.0322	0.3873	2	2	CORIN,NPPA
Pubmed	10493931	Identification of two human dimethylarginine dimethylaminohydrolases with distinct tissue distributions and homology with microbial arginine deiminases.	Pubmed	0.0005557	1	0.0322	0.3873	2	2	DDAH2,DDAH1
Pubmed	7615398	Hb Anamosa or alpha 2(111)(G18)Ala-->Val beta 2 (alpha 2 mutation) and Hb Mulhacen or alpha 2(123)(H6)Ala-->Ser beta 2 (alpha 1 mutation) are two silent, stable variants detected by sequencing of amplified DNA.	Pubmed	0.0005557	1	0.0322	0.3873	2	2	HBA1,HBA2
Pubmed	1721567	Shiverer jimpy double mutant mice. V. Correlation of genotype and myelin proteins.	Pubmed	0.0005557	1	0.0322	0.3873	2	2	MBP,PLP1
Pubmed	29298733	Progressive striatonigral degeneration in a transgenic mouse model of multiple system atrophy: translational implications for interventional therapies.	Pubmed	0.0005557	1	0.0322	0.3873	2	2	SNCA,PLP1
Pubmed	16081878	Expanding the febrigenic role of cyclooxygenase-2 to the previously overlooked responses.	Pubmed	0.0005557	1	0.0322	0.3873	2	2	PTGS1,PTGS2
Pubmed	17105783	Expression and regulation of prostaglandin E synthase isoforms in human myometrium with labour.	Pubmed	0.0005557	1	0.0322	0.3873	2	2	PTGS1,PTGS2
Pubmed	28883619	Tertiary and quaternary structural basis of oxygen affinity in human hemoglobin as revealed by multiscale simulations.	Pubmed	0.0005557	1	0.0322	0.3873	2	2	HBA1,HBB
Pubmed	19491722	Analyses of single nucleotide polymorphisms and haplotype linkage of LOC387715 and the HTRA1 gene in exudative age-related macular degeneration in a Chinese cohort.	Pubmed	0.0005557	1	0.0322	0.3873	2	2	ARMS2,HTRA1
Pubmed	27820700	The transcription factor NR4A3 controls CD103+ dendritic cell migration.	Pubmed	0.0005557	1	0.0322	0.3873	2	2	ITGAE,NR4A3
Pubmed	26091465	Heme Oxygenase 1 and 2 Common Genetic Variants and Risk for Essential Tremor.	Pubmed	0.0005557	1	0.0322	0.3873	2	2	HMOX1,HMOX2
Pubmed	10192392	Interacting loci cause severe iris atrophy and glaucoma in DBA/2J mice.	Pubmed	0.0005557	1	0.0322	0.3873	2	2	GPNMB,TYRP1
Pubmed	11978731	Abnormal collagen fibrils in tendons of biglycan/fibromodulin-deficient mice lead to gait impairment, ectopic ossification, and osteoarthritis.	Pubmed	0.0005557	1	0.0322	0.3873	2	2	FMOD,BGN
Pubmed	20302621	Ubiquitin carboxy-terminal hydrolase L1 (UCHL1) S18Y polymorphism in Alzheimer's disease.	Pubmed	0.0005557	1	0.0322	0.3873	2	2	APOE,UCHL1
Pubmed	20888920	Association between GAB2 haplotype and higher glucose metabolism in Alzheimer's disease-affected brain regions in cognitively normal APOE?4 carriers.	Pubmed	0.0005557	1	0.0322	0.3873	2	2	APOE,GAB2
Pubmed	2037305	The mouse polycystic kidney disease mutation (cpk) is located on proximal chromosome 12.	Pubmed	0.0005557	1	0.0322	0.3873	2	2	CYS1,ODC1
Pubmed	8217522	Regional and developmental variations of GFAP and actin mRNA levels in the CNS of jimpy and shiverer mutant mice.	Pubmed	0.0005557	1	0.0322	0.3873	2	2	MBP,PLP1
Pubmed	16912190	Discoidin domain receptor 1 receptor tyrosine kinase induces cyclooxygenase-2 and promotes chemoresistance through nuclear factor-kappaB pathway activation.	Pubmed	0.0005557	1	0.0322	0.3873	2	2	DDR1,PTGS2
Pubmed	9630216	Cyclooxygenase regulates angiogenesis induced by colon cancer cells.	Pubmed	0.0005557	1	0.0322	0.3873	2	2	PTGS1,PTGS2
Pubmed	12657090	Interleukin-6-174 G/C promoter gene polymorphism C allele reduces Alzheimer's disease risk.	Pubmed	0.0005557	1	0.0322	0.3873	2	2	APOE,IL6
Pubmed	17126308	Factor V Leiden and apolipoprotein E genotypes in severe femoropopliteal atherosclerosis with restenosis.	Pubmed	0.0005557	1	0.0322	0.3873	2	2	F5,APOE
Pubmed	8980683	The crystal structure of horse deoxyhaemoglobin trapped in the high-affinity (R) state.	Pubmed	0.0005557	1	0.0322	0.3873	2	2	HBA2,HBB
Pubmed	31359244	TGF-?2 antagonizes IL-6-promoted cell survival.	Pubmed	0.0005557	1	0.0322	0.3873	2	2	TGFB2,IL6
Pubmed	22518005	Kidney injury accelerates cystogenesis via pathways modulated by heme oxygenase and complement.	Pubmed	0.0005557	1	0.0322	0.3873	2	2	C3,HMOX1
Pubmed	19359777	Microcytic hypochromic anemia patients with thalassemia: genotyping approach.	Pubmed	0.0005557	1	0.0322	0.3873	2	2	HBA1,HBB
Pubmed	12664596	Determination of cyclooxygenase and arachidonic acid metabolites in invasive human prostate cancer cells.	Pubmed	0.0005557	1	0.0322	0.3873	2	2	PTGS1,PTGS2
Pubmed	1536575	Prostaglandin endoperoxide synthase gene structure: identification of the transcriptional start site and 5'-flanking regulatory sequences.	Pubmed	0.0005557	1	0.0322	0.3873	2	2	PTGS1,PTGS2
Pubmed	26714766	Polymorphisms in the IL-6 and IL-6R receptor genes as new diagnostic biomarkers of acute appendicitis: a study on two candidate genes in pediatric patients with acute appendicitis.	Pubmed	0.0005557	1	0.0322	0.3873	2	2	IL6,IL6R
Pubmed	21490101	Analysis of interferon signaling by infectious hepatitis C virus clones with substitutions of core amino acids 70 and 91.	Pubmed	0.0005557	1	0.0322	0.3873	2	2	SOCS3,IL6
Pubmed	30971765	Role of Per3, a circadian clock gene, in embryonic development of mouse cerebral cortex.	Pubmed	0.0005557	1	0.0322	0.3873	2	2	PER3,RORB
Pubmed	15469418	Exploration of multilocus effects in a highly polymorphic gene, the apolipoprotein (APOB) gene, in relation to plasma apoB levels.	Pubmed	0.0005557	1	0.0322	0.3873	2	2	APOB,APOE
Pubmed	12657565	Key enzymes for renal prostaglandin synthesis: site-specific expression in rodent kidney (rat, mouse).	Pubmed	0.0005557	1	0.0322	0.3873	2	2	PTGS1,PTGS2
Pubmed	27683113	ESM1 mediates NGFR-induced invasion and metastasis in murine oral squamous cell carcinoma.	Pubmed	0.0005557	1	0.0322	0.3873	2	2	NGFR,ESM1
Pubmed	17933965	Dimethylarginine dimethylaminohydrolase (DDAH): expression, regulation, and function in the cardiovascular and renal systems.	Pubmed	0.0005557	1	0.0322	0.3873	2	2	DDAH2,DDAH1
Pubmed	21150878	Association between ORMDL3, IL1RL1 and a deletion on chromosome 17q21 with asthma risk in Australia.	Pubmed	0.0005557	1	0.0322	0.3873	2	2	IL1RL1,ORMDL3
Pubmed	18049952	Disease-related quantitation of TGF-beta3 in human aqueous humor.	Pubmed	0.0005557	1	0.0322	0.3873	2	2	TGFB2,TGFB3
Pubmed	11790768	Phosphorylation-dependent functional coupling of hSlo calcium-dependent potassium channel and its hbeta 4 subunit.	Pubmed	0.0005557	1	0.0322	0.3873	2	2	KCNMB4,KCNMB1
Pubmed	19436308	The prolyl 3-hydroxylases P3H2 and P3H3 are novel targets for epigenetic silencing in breast cancer.	Pubmed	0.0005557	1	0.0322	0.3873	2	2	P3H3,P3H2
Pubmed	11073809	Astrocytic alterations in interleukin-6/Soluble interleukin-6 receptor alpha double-transgenic mice.	Pubmed	0.0005557	1	0.0322	0.3873	2	2	IL6,IL6R
Pubmed	8661062	Scn2b, a voltage-gated sodium channel beta2 gene on mouse chromosome 9.	Pubmed	0.0005557	1	0.0322	0.3873	2	2	SCN2B,IL10RA
Pubmed	11857554	Apolipoprotein B and apolipoprotein E genotypes and sporadic holoprosencephaly.	Pubmed	0.0005557	1	0.0322	0.3873	2	2	APOB,APOE
Pubmed	15504548	Modulation of the expression and activity of cyclooxygenases in normal and accelerated erythropoiesis.	Pubmed	0.0005557	1	0.0322	0.3873	2	2	PTGS1,PTGS2
Pubmed	19065273	Sequence variants in HTRA1 and LOC387715/ARMS2 and phenotype and response to photodynamic therapy in neovascular age-related macular degeneration in populations from Israel.	Pubmed	0.0005557	1	0.0322	0.3873	2	2	ARMS2,HTRA1
Pubmed	17724704	Mutations and polymorphisms in hemoglobin genes and the risk of pulmonary hypertension and death in sickle cell disease.	Pubmed	0.0005557	1	0.0322	0.3873	2	2	HBA1,HBB
Pubmed	27706574	Polymorphisms in ADAMTS4 and ADAMTS5 are not linked to susceptibility to knee osteoarthritis in the Turkish population.	Pubmed	0.0005557	1	0.0322	0.3873	2	2	ADAMTS5,ADAMTS4
Pubmed	20357271	Differential expression of the enzymatic system controlling synthesis, metabolism, and transport of PGF2 alpha in human fetal membranes.	Pubmed	0.0005557	1	0.0322	0.3873	2	2	SLCO2A1,PTGS1
Pubmed	20061361	Tumor formation in a mouse model of colitis-associated colon cancer does not require COX-1 or COX-2 expression.	Pubmed	0.0005557	1	0.0322	0.3873	2	2	PTGS1,PTGS2
Pubmed	23916117	Aluminium, carbonyls and cytokines in human nipple aspirate fluids: Possible relationship between inflammation, oxidative stress and breast cancer microenvironment.	Pubmed	0.0005557	1	0.0322	0.3873	2	2	CCL2,IL6
Pubmed	1177322	Three-dimensional fourier synthesis of human deoxyhaemoglobin at 2-5 A resolution: refinement of the atomic model.	Pubmed	0.0005557	1	0.0322	0.3873	2	2	HBA1,HBB
Pubmed	17977913	Cyclooxygenase mRNA expression in human patellar tendon at rest and after exercise.	Pubmed	0.0005557	1	0.0322	0.3873	2	2	PTGS1,PTGS2
Pubmed	20215859	Assessing prostate cancer growth with mRNA of spermine metabolic enzymes.	Pubmed	0.0005557	1	0.0322	0.3873	2	2	AMD1,AZIN1
Pubmed	17938173	Distinguishing aggrecan loss from aggrecan proteolysis in ADAMTS-4 and ADAMTS-5 single and double deficient mice.	Pubmed	0.0005557	1	0.0322	0.3873	2	2	ADAMTS5,ADAMTS4
Pubmed	20800651	Serum anti-inflammatory markers in general population subjects with elevated depressive symptoms.	Pubmed	0.0005557	1	0.0322	0.3873	2	2	IL1RN,IL6
Pubmed	11956193	Inhibition of ADAM-TS4 and ADAM-TS5 prevents aggrecan degradation in osteoarthritic cartilage.	Pubmed	0.0005557	1	0.0322	0.3873	2	2	ADAMTS5,ADAMTS4
Pubmed	29991527	Promotes Invasion through a 3'-Hairpin Structure and Associates with Prognosis in Glioblastoma.	Pubmed	0.0005557	1	0.0322	0.3873	2	2	MIR4435-2HG,CYTOR
Pubmed	2752146	Locus assignment of two alpha-globin structural mutants from the Caribbean basin: alpha Fort de France (alpha 45 Arg) and alpha Spanish Town (alpha 27 Val).	Pubmed	0.0005557	1	0.0322	0.3873	2	2	HBA1,HBA2
Pubmed	23982842	Complement factor C3a alters proteasome function in human RPE cells and in an animal model of age-related RPE degeneration.	Pubmed	0.0005557	1	0.0322	0.3873	2	2	CCL2,C3
Pubmed	16127269	Release of interleukin-6 and its soluble receptors by activated peripheral blood monocytes is elevated in hypocholesterolemic hemodialysis patients.	Pubmed	0.0005557	1	0.0322	0.3873	2	2	IL6,IL6R
Pubmed	29500864	Association between serum autotaxin or phosphatidylserine-specific phospholipase A1 levels and melanoma.	Pubmed	0.0005557	1	0.0322	0.3873	2	2	PLA1A,ENPP2
Pubmed	21252205	Risk- and non-risk-associated variants at the 10q26 AMD locus influence ARMS2 mRNA expression but exclude pathogenic effects due to protein deficiency.	Pubmed	0.0005557	1	0.0322	0.3873	2	2	ARMS2,HTRA1
Pubmed	12183660	Distinct roles for cyclooxygenases 1 and 2 in interleukin-1-induced behavioral changes.	Pubmed	0.0005557	1	0.0322	0.3873	2	2	PTGS1,PTGS2
Pubmed	29752723	Mimetics of suppressor of cytokine signaling 3: Novel potential therapeutics in triple breast cancer.	Pubmed	0.0005557	1	0.0322	0.3873	2	2	SOCS3,JAK2
Pubmed	28981549	Retinal pathology in the PPCD1 mouse.	Pubmed	0.0005557	1	0.0322	0.3873	2	2	GPNMB,TYRP1
Pubmed	6083474	Interaction between human myelin basic protein and lipophilin.	Pubmed	0.0005557	1	0.0322	0.3873	2	2	MBP,PLP1
Pubmed	11884745	Molecular chaperones in the cytosol: from nascent chain to folded protein.	Pubmed	0.0005557	1	0.0322	0.3873	2	2	PFDN1,PFDN4
Pubmed	18419744	Food-entrained rhythmic expression of PER2 and BMAL1 in murine megakaryocytes does not correlate with circadian rhythms in megakaryopoiesis.	Pubmed	0.0005557	1	0.0322	0.3873	2	2	ARNTL,PER2
Pubmed	27629486	Enhanced T cell responses to IL-6 in type 1 diabetes are associated with early clinical disease and increased IL-6 receptor expression.	Pubmed	0.0005557	1	0.0322	0.3873	2	2	IL6,IL6R
Pubmed	17968948	Double-knockout of ADAMTS-4 and ADAMTS-5 in mice results in physiologically normal animals and prevents the progression of osteoarthritis.	Pubmed	0.0005557	1	0.0322	0.3873	2	2	ADAMTS5,ADAMTS4
Pubmed	16084087	Genetic background influences muscular dystrophy.	Pubmed	0.0005557	1	0.0322	0.3873	2	2	SGCD,SGCG
Pubmed	19786732	In vivo circadian rhythms in gonadotropin-releasing hormone neurons.	Pubmed	0.0005557	1	0.0322	0.3873	2	2	ARNTL,PER2
Pubmed	12784332	Elevated expression of cyclooxygenase-2 is a negative prognostic factor for disease free survival and overall survival in patients with breast carcinoma.	Pubmed	0.0005557	1	0.0322	0.3873	2	2	PTGS1,PTGS2
Pubmed	23434278	Circadian disruption leads to insulin resistance and obesity.	Pubmed	0.0005557	1	0.0322	0.3873	2	2	ARNTL,PER2
Pubmed	10487525	Cyclooxygenase knockout mice: models for elucidating isoform-specific functions.	Pubmed	0.0005557	1	0.0322	0.3873	2	2	PTGS1,PTGS2
Pubmed	23202368	Fibromodulin deficiency reduces low-density lipoprotein accumulation in atherosclerotic plaques in apolipoprotein E-null mice.	Pubmed	0.0005557	1	0.0322	0.3873	2	2	FMOD,APOE
Pubmed	8259924	Linkage between complement components 6 and 7 and glutamic pyruvate transaminase in the marsupial Monodelphis domestica.	Pubmed	0.0005557	1	0.0322	0.3873	2	2	C6,C7
Pubmed	21799210	ROR? induces barrel-like neuronal clusters in the developing neocortex.	Pubmed	0.0005557	1	0.0322	0.3873	2	2	ADCY1,RORB
Pubmed	8676083	Accelerated Nerve Regeneration in Mice by upregulated expression of interleukin (IL) 6 and IL-6 receptor after trauma.	Pubmed	0.0005557	1	0.0322	0.3873	2	2	IL6,IL6R
Pubmed	11158594	Failure of ductus arteriosus closure and remodeling in neonatal mice deficient in cyclooxygenase-1 and cyclooxygenase-2.	Pubmed	0.0005557	1	0.0322	0.3873	2	2	PTGS1,PTGS2
Pubmed	8227090	In vitro chamber specification during embryonic stem cell cardiogenesis. Expression of the ventricular myosin light chain-2 gene is independent of heart tube formation.	Pubmed	0.0005557	1	0.0322	0.3873	2	2	MYL2,NPPA
Pubmed	19262956	GAB2 gene does not modify the risk of Alzheimer's disease in Spanish APOE 4 carriers.	Pubmed	0.0005557	1	0.0322	0.3873	2	2	APOE,GAB2
Pubmed	20186139	Interleukin-6 receptor gene polymorphism modulates interleukin-6 levels and the metabolic syndrome: GBCS-CVD.	Pubmed	0.0005557	1	0.0322	0.3873	2	2	IL6,IL6R
Pubmed	11489266	Cyclooxygenase-2 mediates the febrile response of mice to interleukin-1beta.	Pubmed	0.0005557	1	0.0322	0.3873	2	2	PTGS1,PTGS2
Pubmed	30943793	Analyses of BMAL1 and PER2 Oscillations in a Model of Breast Cancer Progression Reveal Changes With Malignancy.	Pubmed	0.0005557	1	0.0322	0.3873	2	2	ARNTL,PER2
Pubmed	10411296	COX-2 compensation in the uterus of COX-1 deficient mice during the pre-implantation period.	Pubmed	0.0005557	1	0.0322	0.3873	2	2	PTGS1,PTGS2
Pubmed	16103896	An association study of 43 SNPs in 16 candidate genes with atorvastatin response.	Pubmed	0.0005557	1	0.0322	0.3873	2	2	APOE,ABCB1
Pubmed	22293444	Corosolic acid ameliorates atherosclerosis in apolipoprotein E-deficient mice by regulating the nuclear factor-?B signaling pathway and inhibiting monocyte chemoattractant protein-1 expression.	Pubmed	0.0005557	1	0.0322	0.3873	2	2	CCL2,APOE
Pubmed	23029430	Prognostic role of host cyclooxygenase and cytokine genotypes in a Caucasian cohort of patients with gastric adenocarcinoma.	Pubmed	0.0005557	1	0.0322	0.3873	2	2	PTGS1,PTGS2
Pubmed	2575591	Linkage genetics of mouse ornithine decarboxylase (Odc).	Pubmed	0.0005557	1	0.0322	0.3873	2	2	APOB,ODC1
Pubmed	18395775	High adiponectin and adiponectin receptor 1 expression in synovial fluids and synovial tissues of patients with rheumatoid arthritis.	Pubmed	0.0005557	1	0.0322	0.3873	2	2	CCL2,IL6
Pubmed	12615667	Amino terminal 38.9% of apolipoprotein B-100 is sufficient to support cholesterol-rich lipoprotein production and atherosclerosis.	Pubmed	0.0005557	1	0.0322	0.3873	2	2	APOB,APOE
Pubmed	4550395	Multiple alpha chain loci for human haemoglobins: Hb J-Buda and Hb G-Pest.	Pubmed	0.0005557	1	0.0322	0.3873	2	2	HBA1,HBA2
Pubmed	17187019	Plasma nerve growth factor (NGF) and inflammatory cytokines (IL-6 and MCP-1) in young and adult subjects with Down syndrome: an interesting pathway.	Pubmed	0.0005557	1	0.0322	0.3873	2	2	CCL2,IL6
Pubmed	26888934	Impaired Dendritic Development and Memory in Sorbs2 Knock-Out Mice.	Pubmed	0.0005557	1	0.0322	0.3873	2	2	SORBS2,TMEM163
Pubmed	25820397	Induction and functional significance of the heme oxygenase system in pathological shear stress in vivo.	Pubmed	0.0005557	1	0.0322	0.3873	2	2	HMOX1,HMOX2
Pubmed	2169733	Isolation and functional expression of the human atrial natriuretic peptide clearance receptor cDNA.	Pubmed	0.0005557	1	0.0322	0.3873	2	2	NPPA,NPR3
Pubmed	11267656	Diazepam and rolipram differentially inhibit cyclic AMP-specific phosphodiesterases PDE4A1 and PDE4B3 in the mouse.	Pubmed	0.0005557	1	0.0322	0.3873	2	2	PDE4A,PDE4B
Pubmed	9070836	Direct interaction of the mitochondrial membrane protein carnitine palmitoyltransferase I with Bcl-2.	Pubmed	0.0005557	1	0.0322	0.3873	2	2	BCL2,CPT1A
Pubmed	29720262	Upper zone of growth plate and cartilage matrix associated protein protects cartilage during inflammatory arthritis.	Pubmed	0.0005557	1	0.0322	0.3873	2	2	ADAMTS5,UCMA
Pubmed	16732331	Hematopoietic cells from gadd45a-deficient and gadd45b-deficient mice exhibit impaired stress responses to acute stimulation with cytokines, myeloablation and inflammation.	Pubmed	0.0005557	1	0.0322	0.3873	2	2	GADD45B,GADD45A
Pubmed	17823288	p25alpha relocalizes in oligodendroglia from myelin to cytoplasmic inclusions in multiple system atrophy.	Pubmed	0.0005557	1	0.0322	0.3873	2	2	MBP,TPPP
Pubmed	15339676	Combined analysis of bcl-2 and MDR1 proteins in 256 cases of acute myeloid leukemia.	Pubmed	0.0005557	1	0.0322	0.3873	2	2	BCL2,ABCB1
Pubmed	23320904	The role of lipid-related genes, aging-related processes, and environment in healthspan.	Pubmed	0.0005557	1	0.0322	0.3873	2	2	APOB,APOE
Pubmed	11307827	Neutrophil proteases can inactivate human PAR3 and abolish the co-receptor function of PAR3 on murine platelets.	Pubmed	0.0005557	1	0.0322	0.3873	2	2	F2RL2,CTSG
Pubmed	24584117	MicroRNA-126-5p promotes endothelial proliferation and limits atherosclerosis by suppressing Dlk1.	Pubmed	0.0005557	1	0.0322	0.3873	2	2	APOE,DLK1
Pubmed	30447345	TGF-?1 promotes cell migration in hepatocellular carcinoma by suppressing reelin expression.	Pubmed	0.0005557	1	0.0322	0.3873	2	2	RELN,LTBP1
Pubmed	11160857	Pharmacological comparison of native mitochondrial K(ATP) channels with molecularly defined surface K(ATP) channels.	Pubmed	0.0005557	1	0.0322	0.3873	2	2	ABCC8,KCNJ8
Pubmed	21917603	Role of subchondral bone during early-stage experimental TMJ osteoarthritis.	Pubmed	0.0005557	1	0.0322	0.3873	2	2	FMOD,BGN
Pubmed	30146452	Intranasal carnosine attenuates transcriptomic alterations and improves mitochondrial function in the Thy1-aSyn mouse model of Parkinson's disease.	Pubmed	0.0005557	1	0.0322	0.3873	2	2	SNCA,THY1
Pubmed	16152798	[Polymorphic gene markers of lipid metabolism are associated with diabetic nephropathy in patients with type 1 diabetes mellitus].	Pubmed	0.0005557	1	0.0322	0.3873	2	2	APOB,APOE
Pubmed	19253527	[Expression of OX40 and Bcl-2 in allergic rhinitis].	Pubmed	0.0005557	1	0.0322	0.3873	2	2	BCL2,TNFRSF4
Pubmed	25967234	Do relevant markers of cancer stem cells CD133 and Nestin indicate a poor prognosis in glioma patients? A systematic review and meta-analysis.	Pubmed	0.0005557	1	0.0322	0.3873	2	2	NES,PROM1
Pubmed	18593792	Genetic markers within glutamate receptors associated with antidepressant treatment-emergent suicidal ideation.	Pubmed	0.0005557	1	0.0322	0.3873	2	2	GRIA3,GRIK2
Pubmed	30795802	Association of HTRA1 and ARMS2 gene polymorphisms with response to intravitreal ranibizumab among neovascular age-related macular degenerative subjects.	Pubmed	0.0005557	1	0.0322	0.3873	2	2	ARMS2,HTRA1
Pubmed	10729341	Elevated levels of the chemokine GRO-1 correlate with elevated oligodendrocyte progenitor proliferation in the jimpy mutant.	Pubmed	0.0005557	1	0.0322	0.3873	2	2	ASIP,PLP1
Pubmed	14741101	ApoE and clusterin cooperatively suppress Abeta levels and deposition: evidence that ApoE regulates extracellular Abeta metabolism in vivo.	Pubmed	0.0005557	1	0.0322	0.3873	2	2	APOE,CLU
Pubmed	8624078	Morphological, biochemical, and genetic support for an apolipoprotein E effect on microtubular metabolism.	Pubmed	0.0005557	1	0.0322	0.3873	2	2	MAP2,APOE
Pubmed	16247030	Retinal ganglion cell degeneration is topological but not cell type specific in DBA/2J mice.	Pubmed	0.0005557	1	0.0322	0.3873	2	2	GPNMB,TYRP1
Pubmed	18988889	Brief report: increased apoptosis in advanced atherosclerotic lesions of Apoe-/- mice lacking macrophage Bcl-2.	Pubmed	0.0005557	1	0.0322	0.3873	2	2	APOE,BCL2
Pubmed	31171699	GADD45 promotes locus-specific DNA demethylation and 2C cycling in embryonic stem cells.	Pubmed	0.0005557	1	0.0322	0.3873	2	2	GADD45B,GADD45A
Pubmed	11502364	Genetic polymorphism in the cathepsin G gene and the risk of Alzheimer's disease.	Pubmed	0.0005557	1	0.0322	0.3873	2	2	APOE,CTSG
Pubmed	16787416	Cyclooxygenase-1 and -2 enzymes differentially regulate the brain upstream NF-kappa B pathway and downstream enzymes involved in prostaglandin biosynthesis.	Pubmed	0.0005557	1	0.0322	0.3873	2	2	PTGS1,PTGS2
Pubmed	16040051	Cyclooxygenase-2 promotes early atherosclerotic lesion formation in ApoE-deficient and C57BL/6 mice.	Pubmed	0.0005557	1	0.0322	0.3873	2	2	APOE,PTGS2
Pubmed	21575264	G protein-coupled receptor kinase 5 mediates Tazarotene-induced gene 1-induced growth suppression of human colon cancer cells.	Pubmed	0.0005557	1	0.0322	0.3873	2	2	GRK5,RARRES1
Pubmed	23562810	The influence of T cell Ig mucin-3 signaling on central nervous system autoimmune disease is determined by the effector function of the pathogenic T cells.	Pubmed	0.0005557	1	0.0322	0.3873	2	2	HAVCR2,THY1
Pubmed	21990077	The impact of sleep deprivation and nighttime light exposure on clock gene expression in humans.	Pubmed	0.0005557	1	0.0322	0.3873	2	2	ARNTL,PER2
Pubmed	16612079	Mice deficient in biglycan and fibromodulin as a model for temporomandibular joint osteoarthritis.	Pubmed	0.0005557	1	0.0322	0.3873	2	2	FMOD,BGN
Pubmed	20438838	Inactivation of IL-6 and soluble IL-6 receptor by neutrophil derived serine proteases in cystic fibrosis.	Pubmed	0.0005557	1	0.0322	0.3873	2	2	IL6,IL6R
Pubmed	9815267	Interleukin 6 influences germinal center development and antibody production via a contribution of C3 complement component.	Pubmed	0.0005557	1	0.0322	0.3873	2	2	C3,IL6
Pubmed	17849060	JAK2V617F mutation as a marker of a latent myeloproliferative disorder in a patient with Budd-Chiari syndrome and factor V Leiden mutation.	Pubmed	0.0005557	1	0.0322	0.3873	2	2	F5,JAK2
Pubmed	1864465	The SGP-2 gene is developmentally regulated in the mouse kidney and abnormally expressed in collecting duct cysts in polycystic kidney disease.	Pubmed	0.0005557	1	0.0322	0.3873	2	2	CYS1,CLU
Pubmed	21216831	Decompensated heart failure is associated with reduced corin levels and decreased cleavage of pro-atrial natriuretic peptide.	Pubmed	0.0005557	1	0.0322	0.3873	2	2	CORIN,NPPA
Pubmed	23328208	Keratinocyte growth factor-2 stimulates P-glycoprotein expression and function in intestinal epithelial cells.	Pubmed	0.0005557	1	0.0322	0.3873	2	2	FGF10,ABCB1
Pubmed	31601771	Control of aversion by glycine-gated GluN1/GluN3A NMDA receptors in the adult medial habenula.	Pubmed	0.0005557	1	0.0322	0.3873	2	2	GRIN2A,GRIN3A
Pubmed	12035032	Sulfonylurea receptor knockout causes glucose intolerance in mice that is not alleviated by concomitant somatostatin subtype receptor 5 knockout.	Pubmed	0.0005557	1	0.0322	0.3873	2	2	SSTR5,ABCC8
Pubmed	27734361	Gene Expression Analysis of CCN Proteins: Whole-Mount In Situ Hybridization of Ccn2 in Developing Calcified Tissues.	Pubmed	0.0005557	1	0.0322	0.3873	2	2	RUNX2,CCN2
Pubmed	26417691	Angiopoietin-like 4 enhances metastasis and inhibits apoptosis via inducing bone morphogenetic protein 7 in colorectal cancer cells.	Pubmed	0.0005557	1	0.0322	0.3873	2	2	BMP7,ANGPTL4
Pubmed	12122004	Crystal structure of horse carbonmonoxyhemoglobin-bezafibrate complex at 1.55-A resolution. A novel allosteric binding site in R-state hemoglobin.	Pubmed	0.0005557	1	0.0322	0.3873	2	2	HBA2,HBB
Pubmed	19288145	Linking conformation change to hemoglobin activation via chain-selective time-resolved resonance Raman spectroscopy of protoheme/mesoheme hybrids.	Pubmed	0.0005557	1	0.0322	0.3873	2	2	HBA1,HBB
Pubmed	12789270	Neurotrophin-induced melanoma cell migration is mediated through the actin-bundling protein fascin.	Pubmed	0.0005557	1	0.0322	0.3873	2	2	FSCN1,NGFR
Pubmed	18772456	G6PD deficiency, absence of alpha-thalassemia, and hemolytic rate at baseline are significant independent risk factors for abnormally high cerebral velocities in patients with sickle cell anemia.	Pubmed	0.0005557	1	0.0322	0.3873	2	2	HBA1,HBB
Pubmed	11801681	Regulation of prostaglandin endoperoxide synthase-2 and IL-6 expression in mouse bone marrow-derived mast cells by exogenous but not endogenous prostanoids.	Pubmed	0.0005557	1	0.0322	0.3873	2	2	IL6,PTGS2
Pubmed	16137650	Dynamic changes in expression of heme oxygenases in mouse heart and liver during hypoxia.	Pubmed	0.0005557	1	0.0322	0.3873	2	2	HMOX1,HMOX2
Pubmed	16518767	Effects of cyclooxygenase-1 and -2 gene disruption on Helicobacter pylori-induced gastric inflammation.	Pubmed	0.0005557	1	0.0322	0.3873	2	2	PTGS1,PTGS2
Pubmed	19293329	New Zealand Ginger mouse: novel model that associates the tyrp1b pigmentation gene locus with regulation of lean body mass.	Pubmed	0.0005557	1	0.0322	0.3873	2	2	ASIP,TYRP1
Pubmed	24346288	Interleukin-6 released by colon cancer-associated fibroblasts is critical for tumour angiogenesis: anti-interleukin-6 receptor antibody suppressed angiogenesis and inhibited tumour-stroma interaction.	Pubmed	0.0005557	1	0.0322	0.3873	2	2	IL6,IL6R
Pubmed	19692123	Mice carrying a conditional Serca2(flox) allele for the generation of Ca(2+) handling-deficient mouse models.	Pubmed	0.0005557	1	0.0322	0.3873	2	2	ATP2A2,MYL2
Pubmed	30692057	Comparison of fatty acid synthase and cyclooxygenase-2 immunoexpression in embryonal, benign, and malignant odontogenic tissues.	Pubmed	0.0005557	1	0.0322	0.3873	2	2	FASN,PTGS2
Pubmed	25519903	HTRA1 (high temperature requirement A serine peptidase 1) gene is transcriptionally regulated by insertion/deletion nucleotides located at the 3' end of the ARMS2 (age-related maculopathy susceptibility 2) gene in patients with age-related macular degeneration.	Pubmed	0.0005557	1	0.0322	0.3873	2	2	ARMS2,HTRA1
Pubmed	21911460	Cathepsin G and neutrophil elastase play critical and nonredundant roles in lung-protective immunity against Streptococcus pneumoniae in mice.	Pubmed	0.0005557	1	0.0322	0.3873	2	2	CTSG,ELANE
Pubmed	9556620	Protein C inhibitor secreted from activated platelets efficiently inhibits activated protein C on phosphatidylethanolamine of platelet membrane and microvesicles.	Pubmed	0.0005557	1	0.0322	0.3873	2	2	F5,SERPINA5
Pubmed	21561892	An imbalance of COX level is not related to placental abruption.	Pubmed	0.0005557	1	0.0322	0.3873	2	2	PTGS1,PTGS2
Pubmed	12411530	Endogenous cyclo-oxygenase activity regulates mouse gastric surface pH.	Pubmed	0.0005557	1	0.0322	0.3873	2	2	PTGS1,PTGS2
Pubmed	23658720	Enhanced IL-6/IL-6R signaling promotes growth and malignant properties in EBV-infected premalignant and cancerous nasopharyngeal epithelial cells.	Pubmed	0.0005557	1	0.0322	0.3873	2	2	IL6,IL6R
Pubmed	16040151	Interleukin-6 plays a crucial role in the hepatic expression of SOCS3 during acute inflammatory processes in vivo.	Pubmed	0.0005557	1	0.0322	0.3873	2	2	SOCS3,IL6
Pubmed	20083667	Loss of CD4+ T cell IL-6R expression during inflammation underlines a role for IL-6 trans signaling in the local maintenance of Th17 cells.	Pubmed	0.0005557	1	0.0322	0.3873	2	2	IL6,IL6R
Pubmed	10548515	Genetic evidence for distinct roles of COX-1 and COX-2 in the immediate and delayed phases of prostaglandin synthesis in mast cells.	Pubmed	0.0005557	1	0.0322	0.3873	2	2	PTGS1,PTGS2
Pubmed	10837138	Platelet-derived growth factor-mediated signaling through the Shb adaptor protein: effects on cytoskeletal organization.	Pubmed	0.0005557	1	0.0322	0.3873	2	2	SHB,PDGFRA
Pubmed	6726807	The crystal structure of human deoxyhaemoglobin at 1.74 A resolution.	Pubmed	0.0005557	1	0.0322	0.3873	2	2	HBA2,HBB
Pubmed	17684217	Alcohol consumption, interleukin-6 and apolipoprotein E genotypes, and concentrations of interleukin-6 and serum amyloid P in older adults.	Pubmed	0.0005557	1	0.0322	0.3873	2	2	APOE,IL6
Pubmed	12789531	Increased soluble interleukin-6 receptor in vitreous fluid of proliferative vitreoretinopathy.	Pubmed	0.0005557	1	0.0322	0.3873	2	2	IL6,IL6R
Pubmed	12665651	An immunohistochemical survey of nine cases of medullary carcinoma of thyroid including reactivity for Cox-1 and Cox-2 enzymes.	Pubmed	0.0005557	1	0.0322	0.3873	2	2	PTGS1,PTGS2
Pubmed	17720994	Apolipoprotein E-deficient lipoproteins induce foam cell formation by downregulation of lysosomal hydrolases in macrophages.	Pubmed	0.0005557	1	0.0322	0.3873	2	2	APOB,APOE
Pubmed	22985576	[Microtubule-associated protein 2 and nestin expressions in human embryonic and fetal gastric tissues].	Pubmed	0.0005557	1	0.0322	0.3873	2	2	MAP2,NES
Pubmed	12664644	The regulation of cyclooxygenase-1 and -2 in knockout cells and mice.	Pubmed	0.0005557	1	0.0322	0.3873	2	2	PTGS1,PTGS2
Pubmed	20664794	Age-related macular degeneration-associated variants at chromosome 10q26 do not significantly alter ARMS2 and HTRA1 transcript levels in the human retina.	Pubmed	0.0005557	1	0.0322	0.3873	2	2	ARMS2,HTRA1
Pubmed	17631383	Platelet responsiveness to in vitro aspirin is independent of COX-1 and COX-2 protein levels and polymorphisms.	Pubmed	0.0005557	1	0.0322	0.3873	2	2	PTGS1,PTGS2
Pubmed	28837800	Systemic Monocyte Chemotactic Protein-1 Inhibition Modifies Renal Macrophages and Restores Glomerular Endothelial Glycocalyx and Barrier Function in Diabetic Nephropathy.	Pubmed	0.0005557	1	0.0322	0.3873	2	2	CCL2,APOE
Pubmed	16323955	Expression of cyclooxygenase isoforms in developing rat placenta, human term placenta, and BeWo human trophoblast model.	Pubmed	0.0005557	1	0.0322	0.3873	2	2	PTGS1,PTGS2
Pubmed	19886851	Association of an intronic variant of the heme oxygenase-1 gene with hypertension in northern Chinese Han population.	Pubmed	0.0005557	1	0.0322	0.3873	2	2	HMOX1,HMOX2
Pubmed	29042594	Serum SAA1 and APOE are novel indicators for human cytomegalovirus infection.	Pubmed	0.0005557	1	0.0322	0.3873	2	2	SAA1,APOE
Pubmed	12360531	Allosteric effects of chloride ions at the intradimeric alpha1beta1 and alpha2beta2 interfaces of human hemoglobin.	Pubmed	0.0005557	1	0.0322	0.3873	2	2	HBA2,HBB
Pubmed	17286233	Association of low-grade inflammation with nephropathy in type 2 diabetic patients: role of elevated CRP-levels and 2 different gene-polymorphisms of proinflammatory cytokines.	Pubmed	0.0005557	1	0.0322	0.3873	2	2	IL1RN,IL6
Pubmed	25906828	Seminal cyclooxygenase relationship with oxidative stress in infertile oligoasthenoteratozoospermic men with varicocele.	Pubmed	0.0005557	1	0.0322	0.3873	2	2	PTGS1,PTGS2
Pubmed	16773437	Interleukin-6, multidrug resistance protein-1 expression and response to paclitaxel in women with metastatic breast cancer: results of cancer and leukemia group B trial 159806.	Pubmed	0.0005557	1	0.0322	0.3873	2	2	ABCB1,IL6
Pubmed	24254970	Protectin DX, a double lipoxygenase product of DHA, inhibits both ROS production in human neutrophils and cyclooxygenase activities.	Pubmed	0.0005557	1	0.0322	0.3873	2	2	PTGS1,PTGS2
Pubmed	19017980	Complement receptor of the Ig superfamily enhances complement-mediated phagocytosis in a subpopulation of tissue resident macrophages.	Pubmed	0.0005557	1	0.0322	0.3873	2	2	C3,VSIG4
Pubmed	21325601	Serum amyloid A overrides Treg anergy via monocyte-dependent and Treg-intrinsic, SOCS3-associated pathways.	Pubmed	0.0005557	1	0.0322	0.3873	2	2	SAA1,SOCS3
Pubmed	16371440	Glutamate induces oxidative stress and apoptosis in cerebral vascular endothelial cells: contributions of HO-1 and HO-2 to cytoprotection.	Pubmed	0.0005557	1	0.0322	0.3873	2	2	HMOX1,HMOX2
Pubmed	23934850	Cathepsin G deficiency decreases complexity of atherosclerotic lesions in apolipoprotein E-deficient mice.	Pubmed	0.0005557	1	0.0322	0.3873	2	2	APOE,CTSG
Pubmed	27612188	Phospholipase C? Modulates Rap1 Activity and the Endothelial Barrier.	Pubmed	0.0005557	1	0.0322	0.3873	2	2	RAP1GAP,PLCE1
Pubmed	11369455	Immature ovaries and polycystic kidneys in the congenital polycystic kidney mouse may be due to abnormal sex steroid metabolism.	Pubmed	0.0005557	1	0.0322	0.3873	2	2	CYS1,HSD17B8
Pubmed	16982684	Role of the cyclic AMP response element in the bcl-2 promoter in the regulation of endogenous Bcl-2 expression and apoptosis in murine B cells.	Pubmed	0.0005557	1	0.0322	0.3873	2	2	BCL2,TMEM163
Pubmed	25222045	Characterization of two unique ?-globin gene cluster deletions causing ?-thalassemia in Israeli Arabs.	Pubmed	0.0005557	1	0.0322	0.3873	2	2	HBA1,HBA2
Pubmed	20007527	Crucial role of phospholipase Cepsilon in induction of local skin inflammatory reactions in the elicitation stage of allergic contact hypersensitivity.	Pubmed	0.0005557	1	0.0322	0.3873	2	2	IL6,PLCE1
Pubmed	25735328	Expression of Cox-2 and Bcl-2 in Paget's disease of the breast.	Pubmed	0.0005557	1	0.0322	0.3873	2	2	BCL2,PTGS2
Pubmed	23816468	Angiotensin-converting enzyme 2 attenuates oxidative stress and VSMC proliferation via the JAK2/STAT3/SOCS3 and profilin-1/MAPK signaling pathways.	Pubmed	0.0005557	1	0.0322	0.3873	2	2	SOCS3,ACE2
Pubmed	20716950	BCL2 interaction with actin in vitro may inhibit cell motility by enhancing actin polymerization.	Pubmed	0.0005557	1	0.0322	0.3873	2	2	ACTA1,BCL2
Pubmed	15226307	Oligodendroglial modulation of fast axonal transport in a mouse model of hereditary spastic paraplegia.	Pubmed	0.0005557	1	0.0322	0.3873	2	2	MBP,PLP1
Pubmed	18699990	Tetratricopeptide repeat domain 9A is an interacting protein for tropomyosin Tm5NM-1.	Pubmed	0.0005557	1	0.0322	0.3873	2	2	TTC9,TPM3
Pubmed	23450268	Homeostatic and circadian contribution to EEG and molecular state variables of sleep regulation.	Pubmed	0.0005557	1	0.0322	0.3873	2	2	PER2,DBP
Pubmed	11410421	Alpha2(CD31 AGG-->AAG, Arg-->Lys) causing non-deletional alpha-thalassemia in a Chinese family with HbH disease.	Pubmed	0.0005557	1	0.0322	0.3873	2	2	HBA1,HBA2
Pubmed	16815697	Role of COX-1 and COX-2 on skin PGs biosynthesis by mechanical scratching in mice.	Pubmed	0.0005557	1	0.0322	0.3873	2	2	PTGS1,PTGS2
Pubmed	23668350	Structural modeling and simulation studies of human cyclooxygenase (COX) isozymes with selected terpenes: implications in drug designing and development.	Pubmed	0.0005557	1	0.0322	0.3873	2	2	PTGS1,PTGS2
Pubmed	20130114	Toll-like receptor ligands cause proinflammatory and prodiabetic activation of adipocytes via phosphorylation of extracellular signal-regulated kinase and c-Jun N-terminal kinase but not interferon regulatory factor-3.	Pubmed	0.0005557	1	0.0322	0.3873	2	2	CCL2,IL6
Pubmed	19094966	Angptl 4 deficiency improves lipid metabolism, suppresses foam cell formation and protects against atherosclerosis.	Pubmed	0.0005557	1	0.0322	0.3873	2	2	APOE,ANGPTL4
Pubmed	19409809	Urinary monocyte chemoattractant protein-1 (MCP-1) and connective tissue growth factor (CCN2) as prognostic markers for progression of diabetic nephropathy.	Pubmed	0.0005557	1	0.0322	0.3873	2	2	CCL2,CCN2
Pubmed	29784660	Interleukin-6 Reduces ?-Cell Oxidative Stress by Linking Autophagy With the Antioxidant Response.	Pubmed	0.0005557	1	0.0322	0.3873	2	2	IL6,IL6R
Pubmed	23874396	TdIF1 recognizes a specific DNA sequence through its Helix-Turn-Helix and AT-hook motifs to regulate gene transcription.	Pubmed	0.0005557	1	0.0322	0.3873	2	2	RAB20,DNTTIP1
Pubmed	25502789	Amphipathic ?-helices in apolipoproteins are crucial to the formation of infectious hepatitis C virus particles.	Pubmed	0.0005557	1	0.0322	0.3873	2	2	APOB,APOE
Pubmed	1498330	Bcl-2 initiates a new category of oncogenes: regulators of cell death.	Pubmed	0.0005557	1	0.0322	0.3873	2	2	S100A6,BCL2
Pubmed	27011731	Iris transillumination defect and its gene modulators do not correlate with intraocular pressure in the BXD family of mice.	Pubmed	0.0005557	1	0.0322	0.3873	2	2	GPNMB,TYRP1
Pubmed	20080971	Distal histidine stabilizes bound O2 and acts as a gate for ligand entry in both subunits of adult human hemoglobin.	Pubmed	0.0005557	1	0.0322	0.3873	2	2	HBA1,HBB
Pubmed	17506774	Interleukin 6 variable number of tandem repeats (VNTR) gene polymorphism in centenarians.	Pubmed	0.0005557	1	0.0322	0.3873	2	2	APOE,IL6
Pubmed	16675913	Expression of the antiapoptotic proteins clusterin and bcl-2 in laryngeal squamous cell carcinomas.	Pubmed	0.0005557	1	0.0322	0.3873	2	2	BCL2,CLU
Pubmed	29491225	Increased secreted frizzled-related protein 4 and ficolin-3 levels in gestational diabetes mellitus women.	Pubmed	0.0005557	1	0.0322	0.3873	2	2	SFRP4,FCN3
Pubmed	17553421	GAB2 alleles modify Alzheimer's risk in APOE epsilon4 carriers.	Pubmed	0.0005557	1	0.0322	0.3873	2	2	APOE,GAB2
Pubmed	24021059	A mutual activation loop between breast cancer cells and myeloid-derived suppressor cells facilitates spontaneous metastasis through IL-6 trans-signaling in a murine model.	Pubmed	0.0005557	1	0.0322	0.3873	2	2	IL6,IL6R
Pubmed	15582715	Proteinase-activated receptors (PARs)--the PAR3 Neo-N-terminal peptide TFRGAP interacts with PAR1.	Pubmed	0.0005557	1	0.0322	0.3873	2	2	F2R,F2RL2
Pubmed	10999846	Immunohistochemical localization of cyclooxygenase-1 and cyclooxygenase-2 in the human fetal and adult male reproductive tracts.	Pubmed	0.0005557	1	0.0322	0.3873	2	2	PTGS1,PTGS2
Pubmed	16912152	Sleep enhances IL-6 trans-signaling in humans.	Pubmed	0.0005557	1	0.0322	0.3873	2	2	IL6,IL6R
Pubmed	17322116	Resistance exercise and cyclooxygenase (COX) expression in human skeletal muscle: implications for COX-inhibiting drugs and protein synthesis.	Pubmed	0.0005557	1	0.0322	0.3873	2	2	PTGS1,PTGS2
Pubmed	15723861	Increased apoptosis during morphogenesis of the lower cheek teeth in tabby/EDA mice.	Pubmed	0.0005557	1	0.0322	0.3873	2	2	ASIP,EDA
Pubmed	20035055	Biglycan and fibromodulin have essential roles in regulating chondrogenesis and extracellular matrix turnover in temporomandibular joint osteoarthritis.	Pubmed	0.0005557	1	0.0322	0.3873	2	2	FMOD,BGN
Pubmed	18378080	KIBRA gene variants are associated with episodic memory performance in subjective memory complaints.	Pubmed	0.0005557	1	0.0322	0.3873	2	2	APOE,WWC1
Pubmed	8195005	Hb Kurdistan [alpha 47(CE5)Asp-->Tyr], a new alpha chain variant in combination with beta (0)-thalassemia.	Pubmed	0.0005557	1	0.0322	0.3873	2	2	HBA1,HBA2
Pubmed	17555580	Cyclooxygenase activity is important for efficient replication of mouse hepatitis virus at an early stage of infection.	Pubmed	0.0005557	1	0.0322	0.3873	2	2	PTGS1,PTGS2
Pubmed	24866242	Interleukin-33/ST2 signaling promotes production of interleukin-6 and interleukin-8 in systemic inflammation in cigarette smoke-induced chronic obstructive pulmonary disease mice.	Pubmed	0.0005557	1	0.0322	0.3873	2	2	IL1RL1,IL6
Pubmed	12419823	JAK/STAT but not ERK1/ERK2 pathway mediates interleukin (IL)-6/soluble IL-6R down-regulation of Type II collagen, aggrecan core, and link protein transcription in articular chondrocytes. Association with a down-regulation of SOX9 expression.	Pubmed	0.0005557	1	0.0322	0.3873	2	2	IL6,IL6R
Pubmed	20442298	Thrombin regulates the metastatic potential of human rhabdomyosarcoma cells: distinct role of PAR1 and PAR3 signaling.	Pubmed	0.0005557	1	0.0322	0.3873	2	2	F2R,F2RL2
Pubmed	20197062	Interleukin-6 receptor gene polymorphisms were associated with sporadic Alzheimer's disease in Chinese Han.	Pubmed	0.0005557	1	0.0322	0.3873	2	2	APOE,IL6R
Pubmed	17266762	Differential gene expression patterns in cyclooxygenase-1 and cyclooxygenase-2 deficient mouse brain.	Pubmed	0.0005557	1	0.0322	0.3873	2	2	PTGS1,PTGS2
Pubmed	14982859	Secondary coronary artery vasospasm promotes cardiomyopathy progression.	Pubmed	0.0005557	1	0.0322	0.3873	2	2	SGCD,SGCG
Pubmed	18272374	Association study of the GAB2 gene with the risk of developing Alzheimer's disease.	Pubmed	0.0005557	1	0.0322	0.3873	2	2	APOE,GAB2
Pubmed	18980999	Interleukin-6 and soluble interleukin-6 receptor levels as markers of disease extent and prognosis in neuroblastoma.	Pubmed	0.0005557	1	0.0322	0.3873	2	2	IL6,IL6R
Pubmed	26759258	FHL2 mediates tooth development and human dental pulp cell differentiation into odontoblasts, partially by interacting with Runx2.	Pubmed	0.0005557	1	0.0322	0.3873	2	2	FHL2,RUNX2
Pubmed	23616123	Methylation-mediated repression of GADD45A and GADD45G expression in gastric cardia adenocarcinoma.	Pubmed	0.0005557	1	0.0322	0.3873	2	2	GADD45G,GADD45A
Pubmed	17978660	Aggrecanases and aggrecanase-generated fragments in the human intervertebral disc at early and advanced stages of disc degeneration.	Pubmed	0.0005557	1	0.0322	0.3873	2	2	ADAMTS5,ADAMTS4
Pubmed	26801558	Cyclooxygenase-2 contributes to the selective induction of cell death by the endocannabinoid 2-arachidonoyl glycerol in hepatic stellate cells.	Pubmed	0.0005557	1	0.0322	0.3873	2	2	FAAH,PTGS2
Pubmed	8972797	Evidence that some oligodendrocyte progenitors in the developing optic pathway express the plp gene.	Pubmed	0.0005557	1	0.0322	0.3873	2	2	MBP,PLP1
Pubmed	14991064	Smooth muscle cell-extrinsic vascular spasm arises from cardiomyocyte degeneration in sarcoglycan-deficient cardiomyopathy.	Pubmed	0.0005557	1	0.0322	0.3873	2	2	SGCD,SGCG
Pubmed	26092124	Acute perioperative-stress-induced increase of atherosclerotic plaque volume and vulnerability to rupture in apolipoprotein-E-deficient mice is amenable to statin treatment and IL-6 inhibition.	Pubmed	0.0005557	1	0.0322	0.3873	2	2	APOE,IL6
Pubmed	11936618	The tissue-specific, compensatory expression of cyclooxygenase-1 and -2 in transgenic mice.	Pubmed	0.0005557	1	0.0322	0.3873	2	2	PTGS1,PTGS2
Pubmed	6411703	Molecular cloning of mRNA from 3T3 adipocytes. Regulation of mRNA content for glycerophosphate dehydrogenase and other differentiation-dependent proteins during adipocyte development.	Pubmed	0.0005557	1	0.0322	0.3873	2	2	GPD1,CFD
Pubmed	7010180	Homology and concerted evolution at the alpha 1 and alpha 2 loci of human alpha-globin.	Pubmed	0.0005557	1	0.0322	0.3873	2	2	HBA1,HBA2
Pubmed	2467009	Interaction of myelin basic protein and proteolipid protein.	Pubmed	0.0005557	1	0.0322	0.3873	2	2	MBP,PLP1
Pubmed	29491349	The circadian regulator BMAL1 programmes responses to parasitic worm infection via a dendritic cell clock.	Pubmed	0.0005557	1	0.0322	0.3873	2	2	ARNTL,PER2
Pubmed	17255106	ADAMTS-5 deficiency does not block aggrecanolysis at preferred cleavage sites in the chondroitin sulfate-rich region of aggrecan.	Pubmed	0.0005557	1	0.0322	0.3873	2	2	ADAMTS5,ADAMTS4
Pubmed	12165674	Differential expression of apoptotic markers in jimpy and in Plp overexpressors: evidence for different apoptotic pathways.	Pubmed	0.0005557	1	0.0322	0.3873	2	2	PLP1,EDA
Pubmed	23736292	Global but not gonadotrope-specific disruption of Bmal1 abolishes the luteinizing hormone surge without affecting ovulation.	Pubmed	0.0005557	1	0.0322	0.3873	2	2	ARNTL,PER2
Pubmed	24002438	Fibroblast growth factors 7 and 10 are involved in ameloblastoma proliferation via the mitogen-activated protein kinase pathway.	Pubmed	0.0005557	1	0.0322	0.3873	2	2	FGF7,FGF10
Pubmed	19183882	NS398 protects cells from sodium nitroprusside-mediated cytotoxicity through enhancing HO-1 induction independent of COX-2 inhibition.	Pubmed	0.0005557	1	0.0322	0.3873	2	2	HMOX1,PTGS2
Pubmed	19503017	Genetic ancestry modifies pharmacogenetic gene-gene interaction for asthma.	Pubmed	0.0005557	1	0.0322	0.3873	2	2	IL6,IL6R
Pubmed	15831902	Role of cyclooxygenases 1 and 2 in the modulation of neuromuscular functions in the distal colon of humans and mice.	Pubmed	0.0005557	1	0.0322	0.3873	2	2	PTGS1,PTGS2
Pubmed	21959923	Association of ARMS2/HTRA1 variants with polypoidal choroidal vasculopathy phenotype in a Korean population.	Pubmed	0.0005557	1	0.0322	0.3873	2	2	ARMS2,HTRA1
Pubmed	9188567	The shiverer mutation affects the persistence of Theiler's virus in the central nervous system.	Pubmed	0.0005557	1	0.0322	0.3873	2	2	MBP,PLP1
Pubmed	16732282	Genetic model of selective COX2 inhibition reveals novel heterodimer signaling.	Pubmed	0.0005557	1	0.0322	0.3873	2	2	PTGS1,PTGS2
Pubmed	20299683	Monocyte chemoattractant protein-1 deficiency protects against visceral fat-induced atherosclerosis.	Pubmed	0.0005557	1	0.0322	0.3873	2	2	CCL2,APOE
Pubmed	19933195	Analysis of six genetic risk factors highly associated with AMD in the region surrounding ARMS2 and HTRA1 on chromosome 10, region q26.	Pubmed	0.0005557	1	0.0322	0.3873	2	2	ARMS2,HTRA1
Pubmed	16476583	Role of Cbfa1/Runx2 in the fluid shear stress induction of COX-2 in osteoblasts.	Pubmed	0.0005557	1	0.0322	0.3873	2	2	RUNX2,PTGS2
Pubmed	17196951	The role of complement in the adherence of microbubbles to dysfunctional arterial endothelium and atherosclerotic plaque.	Pubmed	0.0005557	1	0.0322	0.3873	2	2	APOE,C3
Pubmed	17430884	Proteolytic activities of human ADAMTS-5: comparative studies with ADAMTS-4.	Pubmed	0.0005557	1	0.0322	0.3873	2	2	ADAMTS5,ADAMTS4
Pubmed	15880952	Cyclooxygenase-2 regulates the degree of apoptosis by modulating bcl-2 protein in pleomorphic adenoma and mucoepidermoid carcinoma of the parotid gland.	Pubmed	0.0005557	1	0.0322	0.3873	2	2	BCL2,PTGS2
Pubmed	20382850	A causal relationship between shear stress and atherosclerotic lesions in apolipoprotein E knockout mice assessed by ultrasound biomicroscopy.	Pubmed	0.0005557	1	0.0322	0.3873	2	2	CCL2,APOE
Pubmed	17384141	Interdependence of lipoxin A4 and heme-oxygenase in counter-regulating inflammation during corneal wound healing.	Pubmed	0.0005557	1	0.0322	0.3873	2	2	HMOX1,HMOX2
Pubmed	17265492	Aggrecan degradation in human articular cartilage explants is mediated by both ADAMTS-4 and ADAMTS-5.	Pubmed	0.0005557	1	0.0322	0.3873	2	2	ADAMTS5,ADAMTS4
Pubmed	24966230	Fibromodulin and Biglycan Modulate Periodontium through TGF?/BMP Signaling.	Pubmed	0.0005557	1	0.0322	0.3873	2	2	FMOD,BGN
Pubmed	10342859	Anovulation in cyclooxygenase-2-deficient mice is restored by prostaglandin E2 and interleukin-1beta.	Pubmed	0.0005557	1	0.0322	0.3873	2	2	PTGS1,PTGS2
Pubmed	16675300	Gene expression of arachidonate cyclooxygenase pathway leading to the delayed synthesis of prostaglandins E2 and F2alpha in response to phorbol 12-myristate 13-acetate and action of these prostanoids during life cycle of adipocytes.	Pubmed	0.0005557	1	0.0322	0.3873	2	2	PTGS1,PTGS2
Pubmed	16872505	An investigation of polymorphisms in the 17q11.2-12 CC chemokine gene cluster for association with multiple sclerosis in Australians.	Pubmed	0.0005557	1	0.0322	0.3873	2	2	CCL2,CCL11
Pubmed	25930193	Allergen-induced IL-6 trans-signaling activates ?? T cells to promote type 2 and type 17 airway inflammation.	Pubmed	0.0005557	1	0.0322	0.3873	2	2	IL6,IL6R
Pubmed	23138098	Alpha thalassaemia and extended alpha globin genes in Sri Lanka.	Pubmed	0.0005557	1	0.0322	0.3873	2	2	HBA1,HBA2
Pubmed	10191089	Close physical linkage of human troponin genes: organization, sequence, and expression of the locus encoding cardiac troponin I and slow skeletal troponin T.	Pubmed	0.0005557	1	0.0322	0.3873	2	2	TNNI3,TNNT1
Pubmed	20526368	Palmitate induced IL-6 and MCP-1 expression in human bladder smooth muscle cells provides a link between diabetes and urinary tract infections.	Pubmed	0.0005557	1	0.0322	0.3873	2	2	CCL2,IL6
Pubmed	26894432	Heme Oxygenase-1 Expression Affects Murine Abdominal Aortic Aneurysm Progression.	Pubmed	0.0005557	1	0.0322	0.3873	2	2	APOE,HMOX1
Pubmed	15561778	Bcl-2 overexpression leads to increases in suppressor of cytokine signaling-3 expression in B cells and de novo follicular lymphoma.	Pubmed	0.0005557	1	0.0322	0.3873	2	2	BCL2,SOCS3
Pubmed	26343804	Apolipoprotein E and Clusterin can magnify effects of personality vulnerability on declarative memory performance in non-demented older adults.	Pubmed	0.0005557	1	0.0322	0.3873	2	2	APOE,CLU
Pubmed	17376866	Protease-activated receptor-3 (PAR3) regulates PAR1 signaling by receptor dimerization.	Pubmed	0.0005557	1	0.0322	0.3873	2	2	F2R,F2RL2
Pubmed	20136974	Anti-inflammatory actions of probiotics through activating suppressor of cytokine signaling (SOCS) expression and signaling in Helicobacter pylori infection: a novel mechanism.	Pubmed	0.0005557	1	0.0322	0.3873	2	2	SOCS2,SOCS3
Pubmed	15679583	Immunohistochemical analysis of keratinocyte growth factor and fibroblast growth factor 10 expression in psoriasis.	Pubmed	0.0005557	1	0.0322	0.3873	2	2	FGF7,FGF10
Pubmed	11984523	The role of transforming growth factor beta-2, beta-3 in mediating apoptosis in the murine intestinal mucosa.	Pubmed	0.0005557	1	0.0322	0.3873	2	2	TGFB2,TGFB3
Pubmed	17697546	[Correlation of cyclooxygenase-2 expression to P-glycoprotein expression in B-cell non-Hodgkin's lymphoma].	Pubmed	0.0005557	1	0.0322	0.3873	2	2	ABCB1,PTGS2
Pubmed	22324317	A novel ?(0) -thalassemia deletion in a Greek patient with HbH disease and ?-thalassemia trait.	Pubmed	0.0005557	1	0.0322	0.3873	2	2	HBA1,HBB
Pubmed	25275584	CDCP1 identifies a CD146 negative subset of marrow fibroblasts involved with cytokine production.	Pubmed	0.0005557	1	0.0322	0.3873	2	2	MCAM,CDCP1
Pubmed	26377141	Evaluation of Alpha-Thalassemia Mutations in Cases with Hypochromic Microcytic Anemia: The ?stanbul Perspective.	Pubmed	0.0005557	1	0.0322	0.3873	2	2	HBA1,HBA2
Pubmed	24993179	Interleukin-6, but not the interleukin-6 receptor plays a role in recovery from dextran sodium sulfate-induced colitis.	Pubmed	0.0005557	1	0.0322	0.3873	2	2	IL6,IL6R
Pubmed	8506363	Positional specification of ventricular myosin light chain 2 expression in the primitive murine heart tube.	Pubmed	0.0005557	1	0.0322	0.3873	2	2	MYL2,NPPA
Pubmed	8829919	Jimpy 4J: a new X-linked mouse mutation producing severe CNS hypomyelination.	Pubmed	0.0005557	1	0.0322	0.3873	2	2	PLP1,EDA
Pubmed	15542509	Cyclooxygenase 1 is required for pH control at the mouse gastric surface.	Pubmed	0.0005557	1	0.0322	0.3873	2	2	PTGS1,PTGS2
Pubmed	19767186	Ocular prostaglandin production and morphology in mice lacking a single isoform of cyclooxygenase.	Pubmed	0.0005557	1	0.0322	0.3873	2	2	PTGS1,PTGS2
Pubmed	9514655	Modulation of prostaglandin H synthase-2 mRNA expression by 2,3,7,8-tetrachlorodibenzo-p-dioxin in mice.	Pubmed	0.0005557	1	0.0322	0.3873	2	2	PTGS1,PTGS2
Pubmed	22374170	Rapid identification of the copy number of ?-globin genes by capillary electrophoresis analysis.	Pubmed	0.0005557	1	0.0322	0.3873	2	2	HBA1,HBA2
Pubmed	19769727	Differential expression of cyclooxygenases in hypertrophic scar and keloid tissues.	Pubmed	0.0005557	1	0.0322	0.3873	2	2	PTGS1,PTGS2
Pubmed	12763067	Connective tissue growth factor: a novel marker of layer VII neurons in the rat cerebral cortex.	Pubmed	0.0005557	1	0.0322	0.3873	2	2	MAP2,CCN2
Pubmed	15637153	Hypertension in mice lacking the proatrial natriuretic peptide convertase corin.	Pubmed	0.0005557	1	0.0322	0.3873	2	2	CORIN,NPPA
Pubmed	15816827	Global gene expression analysis of keloid fibroblasts in response to electron beam irradiation reveals the involvement of interleukin-6 pathway.	Pubmed	0.0005557	1	0.0322	0.3873	2	2	IL6,IL6R
Pubmed	1890702	Oligodendrocytes of the jimpy phenotype can be partially restored by environmental factors in vivo.	Pubmed	0.0005557	1	0.0322	0.3873	2	2	MBP,PLP1
Pubmed	19850937	Zinc protoporphyrin regulates cyclin D1 expression independent of heme oxygenase inhibition.	Pubmed	0.0005557	1	0.0322	0.3873	2	2	CCND1,HMOX1
Pubmed	26715742	CAMSAP3 orients the apical-to-basal polarity of microtubule arrays in epithelial cells.	Pubmed	0.0005557	1	0.0322	0.3873	2	2	CAMSAP3,TMEM163
Pubmed	23650618	Roles of adipocytes and fibroblasts in activation of the alternative pathway of complement in inflammatory arthritis in mice.	Pubmed	0.0005557	1	0.0322	0.3873	2	2	MASP1,CFD
Pubmed	9665805	Localization of prostaglandin-H synthase-1 and -2 in mouse skin: implications for cutaneous function.	Pubmed	0.0005557	1	0.0322	0.3873	2	2	PTGS1,PTGS2
Pubmed	22355774	Excess ?-synuclein worsens disease in mice lacking ubiquitin carboxy-terminal hydrolase L1.	Pubmed	0.0005557	1	0.0322	0.3873	2	2	SNCA,UCHL1
Pubmed	30888503	Similarities and differences in tissue distribution of DLK1 and DLK2 during E16.5 mouse embryogenesis.	Pubmed	0.0005557	1	0.0322	0.3873	2	2	DLK2,DLK1
Pubmed	16556900	Sex differences in inflammation and inflammatory pain in cyclooxygenase-deficient mice.	Pubmed	0.0005557	1	0.0322	0.3873	2	2	PTGS1,PTGS2
Pubmed	26652036	Comparison of the Mechanisms of Heme Hydroxylation by Heme Oxygenases-1 and -2: Kinetic and Cryoreduction Studies.	Pubmed	0.0005557	1	0.0322	0.3873	2	2	HMOX1,HMOX2
Pubmed	20585578	The interaction between coagulation factor 2 receptor and interleukin 6 haplotypes increases the risk of myocardial infarction in men.	Pubmed	0.0005557	1	0.0322	0.3873	2	2	F2R,IL6
Pubmed	14649316	Hb Setif [alpha94(G1)Asp --> Tyr (alpha2)] detected in a Turkish family.	Pubmed	0.0005557	1	0.0322	0.3873	2	2	HBA1,HBA2
Pubmed	10950934	Chromosomal localization, gene structure, and expression pattern of DDAH1: comparison with DDAH2 and implications for evolutionary origins.	Pubmed	0.0005557	1	0.0322	0.3873	2	2	DDAH2,DDAH1
Pubmed	20010544	Circulating methylarginine levels and the decline in renal function in patients with chronic kidney disease are modulated by DDAH1 polymorphisms.	Pubmed	0.0005557	1	0.0322	0.3873	2	2	DDAH2,DDAH1
Pubmed	14556006	Interaction of Tim-3 and Tim-3 ligand regulates T helper type 1 responses and induction of peripheral tolerance.	Pubmed	0.0005557	1	0.0322	0.3873	2	2	HAVCR2,PLP1
Pubmed	19723114	Celecoxib potentiates the anticancer effect of cisplatin on vulvar cancer cells independently of cyclooxygenase.	Pubmed	0.0005557	1	0.0322	0.3873	2	2	PTGS1,PTGS2
Pubmed	29157669	The combination of IL-6 and its soluble receptor is associated with the response of rheumatoid arthritis patients to tocilizumab.	Pubmed	0.0005557	1	0.0322	0.3873	2	2	IL6,IL6R
Pubmed	2606724	Hb Evans or alpha 262(E11)Val----Met beta 2; an unstable hemoglobin causing a mild hemolytic anemia.	Pubmed	0.0005557	1	0.0322	0.3873	2	2	HBA1,HBA2
Pubmed	11967953	Gene expression signature of benign prostatic hyperplasia revealed by cDNA microarray analysis.	Pubmed	0.0005557	1	0.0322	0.3873	2	2	BMP5,THBS4
Pubmed	25446127	Fibroblast growth factor 10 protects neuron against oxygen-glucose deprivation injury through inducing heme oxygenase-1.	Pubmed	0.0005557	1	0.0322	0.3873	2	2	FGF10,HMOX1
Pubmed	12754507	IL-6 induces an anti-inflammatory response in the absence of SOCS3 in macrophages.	Pubmed	0.0005557	1	0.0322	0.3873	2	2	SOCS3,IL6
Pubmed	9156514	Developmental expression of the cyclo-oxygenase-1 and cyclo-oxygenase-2 genes in the peri-implantation mouse uterus and their differential regulation by the blastocyst and ovarian steroids.	Pubmed	0.0005557	1	0.0322	0.3873	2	2	PTGS1,PTGS2
Pubmed	8424659	Structural determination and promoter analysis of the chicken mitogen-inducible prostaglandin G/H synthase gene and genetic mapping of the murine homolog.	Pubmed	0.0005557	1	0.0322	0.3873	2	2	PTGS1,PTGS2
Pubmed	9708822	Hepatocellular hyperplasia, plasmacytoma formation, and extramedullary hematopoiesis in interleukin (IL)-6/soluble IL-6 receptor double-transgenic mice.	Pubmed	0.0005557	1	0.0322	0.3873	2	2	IL6,IL6R
Pubmed	21288894	PDE4D and PDE4B function in distinct subcellular compartments in mouse embryonic fibroblasts.	Pubmed	0.0005557	1	0.0322	0.3873	2	2	PDE4B,PDE4D
Pubmed	26642365	Serum amyloid A impairs the antiinflammatory properties of HDL.	Pubmed	0.0005557	1	0.0322	0.3873	2	2	SAA1,APOE
Pubmed	18512131	Association of polymorphisms at restriction enzyme recognition sites of apolipoprotein B and E gene with dyslipidemia in children undergoing primary nephrotic syndrome.	Pubmed	0.0005557	1	0.0322	0.3873	2	2	APOB,APOE
Pubmed	28583181	Bringing the age-related macular degeneration high-risk allele age-related maculopathy susceptibility 2 into focus with stem cell technology.	Pubmed	0.0005557	1	0.0322	0.3873	2	2	ARMS2,HTRA1
Pubmed	17982098	Catalytically inactive cyclooxygenase 2 and absence of prostaglandin E2 biosynthesis in murine peritoneal macrophages following in vivo phagocytosis of heat-killed Mycobacterium bovis bacillus Calmette-Guérin.	Pubmed	0.0005557	1	0.0322	0.3873	2	2	PTGS1,PTGS2
Pubmed	12097416	Resistance to experimental autoimmune myasthenia gravis in IL-6-deficient mice is associated with reduced germinal center formation and C3 production.	Pubmed	0.0005557	1	0.0322	0.3873	2	2	C3,IL6
Pubmed	15589375	Distinct protective mechanisms of HO-1 and HO-2 against hydroperoxide-induced cytotoxicity.	Pubmed	0.0005557	1	0.0322	0.3873	2	2	HMOX1,HMOX2
Pubmed	28883509	The circadian clock in immune cells controls the magnitude of Leishmania parasite infection.	Pubmed	0.0005557	1	0.0322	0.3873	2	2	ARNTL,PER2
Pubmed	26080005	Biological effects of interleukin-6: Clinical applications in autoimmune diseases and cancers.	Pubmed	0.0005557	1	0.0322	0.3873	2	2	IL6,IL6R
Pubmed	24647150	Increased levels of eotaxin and MCP-1 in juvenile dermatomyositis median 16.8 years after disease onset; associations with disease activity, duration and organ damage.	Pubmed	0.0005557	1	0.0322	0.3873	2	2	CCL2,CCL11
Pubmed	28108469	Blood RNA biomarkers in prodromal PARK4 and rapid eye movement sleep behavior disorder show role of complexin 1 loss for risk of Parkinson's disease.	Pubmed	0.0005557	1	0.0322	0.3873	2	2	SNCA,CPLX1
Pubmed	18795070	Tpl-2/Cot and COX-2 in breast cancer.	Pubmed	0.0005557	1	0.0322	0.3873	2	2	MAP3K8,PTGS2
Pubmed	29976575	IL-6 Mediates Cross-Talk between Tumor Cells and Activated Fibroblasts in the Tumor Microenvironment.	Pubmed	0.0005557	1	0.0322	0.3873	2	2	IL6,IL6R
Pubmed	12163017	Expression and biological activity of Baculovirus generated wild-type human slow alpha tropomyosin and the Met9Arg mutant responsible for a dominant form of nemaline myopathy.	Pubmed	0.0005557	1	0.0322	0.3873	2	2	ACTA1,TPM3
Pubmed	19060633	Cyclooxygenase polymorphisms in gastric and colorectal carcinogenesis: are conclusive results available?	Pubmed	0.0005557	1	0.0322	0.3873	2	2	PTGS1,PTGS2
Pubmed	27856454	Endothelial Cell-Specific Deletion of P2Y2 Receptor Promotes Plaque Stability in Atherosclerosis-Susceptible ApoE-Null Mice.	Pubmed	0.0005557	1	0.0322	0.3873	2	2	APOE,P2RY2
Pubmed	17927825	New insight into the role of the beta3 subunit of the GABAA-R in development, behavior, body weight regulation, and anesthesia revealed by conditional gene knockout.	Pubmed	0.0005557	1	0.0322	0.3873	2	2	GABRB3,TMEM163
Pubmed	8994299	Disruption of cyclooxygenase genes in mice.	Pubmed	0.0005557	1	0.0322	0.3873	2	2	PTGS1,PTGS2
Pubmed	12163371	Susceptibility of cyclooxygenase-2-deficient mice to pulmonary fibrogenesis.	Pubmed	0.0005557	1	0.0322	0.3873	2	2	PTGS1,PTGS2
Pubmed	25248056	Quantitative analysis of elastase and cathepsin G mRNA levels in peripheral blood CD14(+) cells from patients with rheumatoid arthritis.	Pubmed	0.0005557	1	0.0322	0.3873	2	2	CTSG,ELANE
Pubmed	18632843	CTGF inhibits BMP-7 signaling in diabetic nephropathy.	Pubmed	0.0005557	1	0.0322	0.3873	2	2	BMP7,CCN2
Pubmed	19719848	Effects of genetic deficiency of cyclooxygenase-1 or cyclooxygenase-2 on functional and histological outcomes following traumatic brain injury in mice.	Pubmed	0.0005557	1	0.0322	0.3873	2	2	PTGS1,PTGS2
Pubmed	12055598	COX-1 and 2, intestinal integrity, and pathogenesis of nonsteroidal anti-inflammatory drug enteropathy in mice.	Pubmed	0.0005557	1	0.0322	0.3873	2	2	PTGS1,PTGS2
Pubmed	19965896	PTGS2 and IL6 genetic variation and risk of breast and prostate cancer: results from the Breast and Prostate Cancer Cohort Consortium (BPC3).	Pubmed	0.0005557	1	0.0322	0.3873	2	2	IL6,PTGS2
Pubmed	30082792	A PDGFR?-driven mouse model of glioblastoma reveals a stathmin1-mediated mechanism of sensitivity to vinblastine.	Pubmed	0.0005557	1	0.0322	0.3873	2	2	PDGFRA,STMN1
Pubmed	21122828	ARMS2/HTRA1 locus can confer differential susceptibility to the advanced subtypes of age-related macular degeneration.	Pubmed	0.0005557	1	0.0322	0.3873	2	2	ARMS2,HTRA1
Pubmed	24152848	Novel path to IL-6 trans-signaling through thrombin-induced soluble IL-6 receptor release by platelets.	Pubmed	0.0005557	1	0.0322	0.3873	2	2	IL6,IL6R
Pubmed	7306792	Hypomyelinated mutant mice IV: peripheral myelin in jp msd.	Pubmed	0.0005557	1	0.0322	0.3873	2	2	PLP1,GRIN3A
Pubmed	11416042	Comparative analysis of pharmacologic and/or genetic disruption of cyclooxygenase-1 and cyclooxygenase-2 function in female reproduction in mice.	Pubmed	0.0005557	1	0.0322	0.3873	2	2	PTGS1,PTGS2
Pubmed	22105622	Adult attention-deficit hyperactivity disorder is associated with alterations in circadian rhythms at the behavioural, endocrine and molecular levels.	Pubmed	0.0005557	1	0.0322	0.3873	2	2	ARNTL,PER2
Pubmed	10630643	The role of cyclooxygenases in inflammation, cancer, and development.	Pubmed	0.0005557	1	0.0322	0.3873	2	2	PTGS1,PTGS2
Pubmed	10604301	Mouse genetics: a tool to help unlock the mechanisms of glaucoma.	Pubmed	0.0005557	1	0.0322	0.3873	2	2	GPNMB,TYRP1
Pubmed	17676633	Shb null allele is inherited with a transmission ratio distortion and causes reduced viability in utero.	Pubmed	0.0005557	1	0.0322	0.3873	2	2	SHB,TMEM163
Pubmed	11607834	The Grb7 family proteins: structure, interactions with other signaling molecules and potential cellular functions.	Pubmed	0.0005557	1	0.0322	0.3873	2	2	GRB7,GRB14
Pubmed	24662300	Association between polymorphisms in sclerostin, dickkopfs and secreted frizzled-related protein genes and bone mineral density in postmenopausal Korean women.	Pubmed	0.0005557	1	0.0322	0.3873	2	2	SFRP4,FRZB
Pubmed	22409848	[Expressions and significance of COX-2 and P-gp in human hepatocellular carcinoma tissues].	Pubmed	0.0005557	1	0.0322	0.3873	2	2	ABCB1,PTGS2
Pubmed	17643885	A novel anti-atherogenic role for COX-2--potential mechanism for the cardiovascular side effects of COX-2 inhibitors.	Pubmed	0.0005557	1	0.0322	0.3873	2	2	PTGS1,PTGS2
Pubmed	17641673	Imbalanced synthesis of cyclooxygenase-derived thromboxane A2 and prostacyclin compromises vasomotor function of the thoracic aorta in Marfan syndrome.	Pubmed	0.0005557	1	0.0322	0.3873	2	2	PTGS1,PTGS2
Pubmed	12766039	Ocular and scleral alterations in gene-targeted lumican-fibromodulin double-null mice.	Pubmed	0.0005557	1	0.0322	0.3873	2	2	FMOD,LUM
Pubmed	19276544	Implication of GAB2 gene polymorphism in Italian patients with Alzheimer's disease.	Pubmed	0.0005557	1	0.0322	0.3873	2	2	APOE,GAB2
Pubmed	28828400	Calcium Circadian Rhythmicity in the Suprachiasmatic Nucleus: Cell Autonomy and Network Modulation.	Pubmed	0.0005557	1	0.0322	0.3873	2	2	ARNTL,PER2
Pubmed	27470513	E-Selectin Inhibition Mitigates Splenic HSC Activation and Myelopoiesis in Hypercholesterolemic Mice With Myocardial Infarction.	Pubmed	0.0005557	1	0.0322	0.3873	2	2	SELE,APOE
Pubmed	24333596	Prolactin receptor attenuation induces zinc pool redistribution through ZnT2 and decreases invasion in MDA-MB-453 breast cancer cells.	Pubmed	0.0005557	1	0.0322	0.3873	2	2	PRLR,SLC30A2
Pubmed	17609292	Compensatory paracrine mechanisms that define the urothelial response to injury in partial bladder outlet obstruction.	Pubmed	0.0005557	1	0.0322	0.3873	2	2	FGF7,FGF10
Pubmed	10880574	Corin, a transmembrane cardiac serine protease, acts as a pro-atrial natriuretic peptide-converting enzyme.	Pubmed	0.0005557	1	0.0322	0.3873	2	2	CORIN,NPPA
Pubmed	7881131	Temporally and spatially restricted expression of apolipoprotein J in the developing heart defines discrete stages of valve morphogenesis.	Pubmed	0.0005557	1	0.0322	0.3873	2	2	NPPA,CLU
Pubmed	16540406	Interleukin-6 promoter polymorphism and late-onset Alzheimer's disease in the Finnish population.	Pubmed	0.0005557	1	0.0322	0.3873	2	2	APOE,IL6
Pubmed	23582991	Genetic influences on the outcome of anti-vascular endothelial growth factor treatment in neovascular age-related macular degeneration.	Pubmed	0.0005557	1	0.0322	0.3873	2	2	ARMS2,HTRA1
Pubmed	20196787	Dual action of apolipoprotein E-interacting HCCR-1 oncoprotein and its implication for breast cancer and obesity.	Pubmed	0.0005557	1	0.0322	0.3873	2	2	APOE,LETMD1
Pubmed	22528093	Search for amyloid-binding proteins by affinity chromatography.	Pubmed	0.0005557	1	0.0322	0.3873	2	2	APOE,CLU
Pubmed	16168133	Relationship between the expression of cyclooxygenase 2 and MDR1/P-glycoprotein in invasive breast cancers and their prognostic significance.	Pubmed	0.0005557	1	0.0322	0.3873	2	2	ABCB1,PTGS2
Pubmed	24751653	Adipose tissue-derived human serum amyloid a does not affect atherosclerotic lesion area in hSAA1+/-/ApoE-/- mice.	Pubmed	0.0005557	1	0.0322	0.3873	2	2	SAA1,APOE
Pubmed	19420002	Downregulation of cilia-localized Il-6R alpha by 17beta-estradiol in mouse and human fallopian tubes.	Pubmed	0.0005557	1	0.0322	0.3873	2	2	IL6,IL6R
Pubmed	15171792	Elevated white cell count in acute coronary syndromes: relationship to variants in inflammatory and thrombotic genes.	Pubmed	0.0005557	1	0.0322	0.3873	2	2	IL1RN,IL6
Pubmed	15557373	Impact of interleukin-6 on plaque development and morphology in experimental atherosclerosis.	Pubmed	0.0005557	1	0.0322	0.3873	2	2	APOE,IL6
Pubmed	22178090	The pathological characteristics of glioma stem cell niches.	Pubmed	0.0005557	1	0.0322	0.3873	2	2	NES,PROM1
Pubmed	29233684	mmu-miR-1963 negatively regulates the ameloblast differentiation of LS8 cell line by directly targeting Smoc2 3'UTR.	Pubmed	0.0005557	1	0.0322	0.3873	2	2	SMOC2,RUNX2
Pubmed	25205867	Overexpression of HtrA1 and exposure to mainstream cigarette smoke leads to choroidal neovascularization and subretinal deposits in aged mice.	Pubmed	0.0005557	1	0.0322	0.3873	2	2	ARMS2,HTRA1
Pubmed	31700183	Adipsin preserves beta cells in diabetic mice and associates with protection from type 2 diabetes in humans.	Pubmed	0.0005557	1	0.0322	0.3873	2	2	DUSP26,CFD
Pubmed	15288699	Monocyte chemoattractant protein-1 (MCP-1) gene polymorphism and risk of Alzheimer's disease in Italians.	Pubmed	0.0005557	1	0.0322	0.3873	2	2	CCL2,ABCB1
Pubmed	22284955	Social disruption stress increases IL-6 levels and accelerates atherosclerosis in ApoE-/- mice.	Pubmed	0.0005557	1	0.0322	0.3873	2	2	APOE,IL6
Pubmed	24680324	Plasma oxidized low-density lipoprotein levels and risk of Alzheimer's disease.	Pubmed	0.0005557	1	0.0322	0.3873	2	2	APOB,APOE
Pubmed	23002235	Flow-sensitive K+-coupled ATP secretion modulates activity of the epithelial Na+ channel in the distal nephron.	Pubmed	0.0005557	1	0.0322	0.3873	2	2	KCNMB4,KCNMB1
Pubmed	15585207	Genetic variants of ApoE account for variability of plasma low-density lipoprotein and apolipoprotein B levels in FHBL.	Pubmed	0.0005557	1	0.0322	0.3873	2	2	APOB,APOE
Pubmed	9884514	Glial progenitor cells in normal and pathological states.	Pubmed	0.0005557	1	0.0322	0.3873	2	2	PDGFRA,PLP1
Pubmed	21508398	Roles of BCL-2 and MDR1 expression in the efficacy of paclitaxel-based lung cancer chemoradiation.	Pubmed	0.0005557	1	0.0322	0.3873	2	2	BCL2,ABCB1
Pubmed	20108350	Fibromodulin regulates collagen fibrillogenesis during peripheral corneal development.	Pubmed	0.0005557	1	0.0322	0.3873	2	2	FMOD,LUM
Pubmed	19877065	The infrapatellar fat pad in knee osteoarthritis: an important source of interleukin-6 and its soluble receptor.	Pubmed	0.0005557	1	0.0322	0.3873	2	2	IL6,IL6R
Pubmed	26786611	Association between variation in the genes DDAH1 and DDAH2 and hypertension among Uygur, Kazakh and Han ethnic groups in China.	Pubmed	0.0005557	1	0.0322	0.3873	2	2	DDAH2,DDAH1
Pubmed	18719127	Interleukin-6 regulates pancreatic alpha-cell mass expansion.	Pubmed	0.0005557	1	0.0322	0.3873	2	2	IL6,IL6R
Pubmed	16520895	Increasing ornithine decarboxylase activity is another way of prolactin preventing methotrexate-induced apoptosis: crosstalk between ODC and BCL-2.	Pubmed	0.0005557	1	0.0322	0.3873	2	2	BCL2,ODC1
Pubmed	11694451	Airway inflammation and responsiveness in prostaglandin H synthase-deficient mice exposed to bacterial lipopolysaccharide.	Pubmed	0.0005557	1	0.0322	0.3873	2	2	PTGS1,PTGS2
Pubmed	17673564	Expression and activity of cyclooxygenase isoforms in skeletal muscles and myocardium of humans and rodents.	Pubmed	0.0005557	1	0.0322	0.3873	2	2	PTGS1,PTGS2
Pubmed	16309586	Heme oxygenase-1 transduction in endothelial cells causes downregulation of monocyte chemoattractant protein-1 and of genes involved in inflammation and growth.	Pubmed	0.0005557	1	0.0322	0.3873	2	2	CCL2,HMOX1
Pubmed	29357923	Interleukin-6/interleukin-6 receptor complex promotes osteogenic differentiation of bone marrow-derived mesenchymal stem cells.	Pubmed	0.0005557	1	0.0322	0.3873	2	2	IL6,IL6R
Pubmed	14630706	Genetic deficiency or pharmacological inhibition of cyclooxygenase-1 or -2 induces mouse keratinocyte differentiation in vitro and in vivo.	Pubmed	0.0005557	1	0.0322	0.3873	2	2	PTGS1,PTGS2
Pubmed	17531997	Structure-function properties of the apoE-dependent COX-2 pathway in vascular smooth muscle cells.	Pubmed	0.0005557	1	0.0322	0.3873	2	2	APOE,PTGS2
Pubmed	29540683	The choroid plexus is an important circadian clock component.	Pubmed	0.0005557	1	0.0322	0.3873	2	2	ARNTL,PER2
Pubmed	15365991	Sequence variations of the alpha-globin genes: scanning of high CG content genes with DHPLC and DG-DGGE.	Pubmed	0.0005557	1	0.0322	0.3873	2	2	HBA1,HBA2
Pubmed	11788435	Dietary salt supplementation selectively downregulates NPR-C receptor expression in kidney independently of ANP.	Pubmed	0.0005557	1	0.0322	0.3873	2	2	NPPA,NPR3
Pubmed	1652217	Natriuretic peptides inhibit rat astroglial proliferation: mediation by C receptor.	Pubmed	0.0005557	1	0.0322	0.3873	2	2	NPPA,NPR3
Pubmed	17110378	Targeted cyclooxygenase gene (ptgs) exchange reveals discriminant isoform functionality.	Pubmed	0.0005557	1	0.0322	0.3873	2	2	PTGS1,PTGS2
Pubmed	1374235	Developmental expression of ornithine and S-adenosylmethionine decarboxylases in mouse brain.	Pubmed	0.0005557	1	0.0322	0.3873	2	2	AMD1,ODC1
Pubmed	18606855	Protease-activated receptor 1 activation is necessary for monocyte chemoattractant protein 1-dependent leukocyte recruitment in vivo.	Pubmed	0.0005557	1	0.0322	0.3873	2	2	F2R,CCL2
Pubmed	10216176	The febrile response to lipopolysaccharide is blocked in cyclooxygenase-2(-/-), but not in cyclooxygenase-1(-/-) mice.	Pubmed	0.0005557	1	0.0322	0.3873	2	2	PTGS1,PTGS2
Pubmed	15690149	Fibroblast growth factors 7 and 10 are expressed in the human embryonic pancreatic mesenchyme and promote the proliferation of embryonic pancreatic epithelial cells.	Pubmed	0.0005557	1	0.0322	0.3873	2	2	FGF7,FGF10
Pubmed	18784373	Mechanisms and pathologic significances in increase in serum interleukin-6 (IL-6) and soluble IL-6 receptor after administration of an anti-IL-6 receptor antibody, tocilizumab, in patients with rheumatoid arthritis and Castleman disease.	Pubmed	0.0005557	1	0.0322	0.3873	2	2	IL6,IL6R
Pubmed	18753249	COX-1, and not COX-2 activity, regulates airway function: relevance to aspirin-sensitive asthma.	Pubmed	0.0005557	1	0.0322	0.3873	2	2	PTGS1,PTGS2
Pubmed	21606958	The immunoglobulin heavy chain gene 3' enhancers induce Bcl2 deregulation and lymphomagenesis in murine B cells.	Pubmed	0.0005557	1	0.0322	0.3873	2	2	BCL2,TMEM163
Pubmed	15905495	Cutting edge: silencing suppressor of cytokine signaling 3 expression in dendritic cells turns CD28-Ig from immune adjuvant to suppressant.	Pubmed	0.0005557	1	0.0322	0.3873	2	2	SOCS3,IL6
Pubmed	11062476	The human Rhesus-associated RhAG protein and a kidney homologue promote ammonium transport in yeast.	Pubmed	0.0005557	1	0.0322	0.3873	2	2	RHCG,RHAG
Pubmed	11928814	UVA light stimulates the production of cathepsin G and elastase-like enzymes by dermal fibroblasts: a possible contribution to the remodeling of elastotic areas in sun-damaged skin.	Pubmed	0.0005557	1	0.0322	0.3873	2	2	CTSG,ELANE
Pubmed	12753084	Heme oxygenase-1 and heme oxygenase-2 have distinct roles in the proliferation and survival of olfactory receptor neurons mediated by cGMP and bilirubin, respectively.	Pubmed	0.0005557	1	0.0322	0.3873	2	2	HMOX1,HMOX2
Pubmed	10541313	KGF and FGF-10 stimulate liquid secretion in human fetal lung.	Pubmed	0.0005557	1	0.0322	0.3873	2	2	FGF7,FGF10
Pubmed	12383268	The inhibitory region of troponin-I alters the ability of F-actin to interact with different segments of myosin.	Pubmed	0.0005557	1	0.0322	0.3873	2	2	ACTA1,TNNI3
Pubmed	22924376	Identification of ?-globin chain variants: a report from Iran.	Pubmed	0.0005557	1	0.0322	0.3873	2	2	HBA1,HBA2
Pubmed	23045674	Cyclooxygenase-1, not cyclooxygenase-2, is responsible for physiological production of prostacyclin in the cardiovascular system.	Pubmed	0.0005557	1	0.0322	0.3873	2	2	PTGS1,PTGS2
Pubmed	11944994	Efficient cloning of full-length cDNAs based on cDNA size fractionation.	Pubmed	0.0005557	1	0.0322	0.3873	2	2	TFRC,JAK2
Pubmed	23969301	A novel association of two non-synonymous polymorphisms in PER2 and PER3 genes with specific diurnal preference subscales.	Pubmed	0.0005557	1	0.0322	0.3873	2	2	PER3,PER2
Pubmed	29064674	Heterogeneity between Two ? Subunits of ?2?2 Human Hemoglobin and O2 Binding Properties: Raman, 1H Nuclear Magnetic Resonance, and Terahertz Spectra.	Pubmed	0.0005557	1	0.0322	0.3873	2	2	HBA2,HBB
Pubmed	17051150	Structure of C3b in complex with CRIg gives insights into regulation of complement activation.	Pubmed	0.0005557	1	0.0322	0.3873	2	2	C3,VSIG4
Pubmed	9719152	Glomerular deposition of mannose-binding lectin (MBL) indicates a novel mechanism of complement activation in IgA nephropathy.	Pubmed	0.0005557	1	0.0322	0.3873	2	2	C3,MASP1
Pubmed	26577677	Growth differentiation factor 8 suppresses cell proliferation by up-regulating CTGF expression in human granulosa cells.	Pubmed	0.0005557	1	0.0322	0.3873	2	2	MSTN,CCN2
Pubmed	17624243	Cyclooxygenase isozymes in oral squamous cell carcinoma:a real-time RT-PCR study with clinic pathological correlations.	Pubmed	0.0005557	1	0.0322	0.3873	2	2	PTGS1,PTGS2
Pubmed	22460132	Association study of early-immediate genes in childhood-onset mood disorders and suicide attempt.	Pubmed	0.0005557	1	0.0322	0.3873	2	2	NPTX2,GRM1
Pubmed	17320102	The novel gene EGFL9/Dlk2, highly homologous to Dlk1, functions as a modulator of adipogenesis.	Pubmed	0.0005557	1	0.0322	0.3873	2	2	DLK2,DLK1
Pubmed	10438522	Cloning and characterization of ADAMTS11, an aggrecanase from the ADAMTS family.	Pubmed	0.0005557	1	0.0322	0.3873	2	2	ADAMTS5,ADAMTS4
Pubmed	8071353	Prostaglandin endoperoxide synthase-1 and -2 couple to different transmembrane stimuli to generate prostaglandin D2 in mouse bone marrow-derived mast cells.	Pubmed	0.0005557	1	0.0322	0.3873	2	2	PTGS1,PTGS2
Pubmed	26079381	In Vitro-Stimulated IL-6 Monocyte Secretion and In Vivo Peripheral Blood T Lymphocyte Activation Uniquely Predicted 15-Year Survival in Patients with Head and Neck Squamous Cell Carcinoma.	Pubmed	0.0005557	1	0.0322	0.3873	2	2	TFRC,IL6
Pubmed	11833853	Variable severity of beta-thalassemia patients of eastern India: effect of alpha-thalassemia and xmnI polymorphism.	Pubmed	0.0005557	1	0.0322	0.3873	2	2	HBA1,HBB
Pubmed	17264103	Cyclooxygenase enzyme expression and E series prostaglandin receptor signalling are enhanced in heavy menstruation.	Pubmed	0.0005557	1	0.0322	0.3873	2	2	PTGS1,PTGS2
Pubmed	30063927	Single Nucleotide Polymorphisms of HAAO and IRX6 Genes as Risk Factors for Hypospadias.	Pubmed	0.0005557	1	0.0322	0.3873	2	2	HAAO,IRX6
Pubmed	15166129	A combination of interleukin-6 and its soluble receptor impairs sperm motility: implications in infertility associated with endometriosis.	Pubmed	0.0005557	1	0.0322	0.3873	2	2	IL6,IL6R
Pubmed	17608931	Absence of glaucoma in DBA/2J mice homozygous for wild-type versions of Gpnmb and Tyrp1.	Pubmed	0.0005557	1	0.0322	0.3873	2	2	GPNMB,TYRP1
Pubmed	17495879	Cyclooxygenase polymorphisms and risk of cardiovascular events: the Atherosclerosis Risk in Communities (ARIC) study.	Pubmed	0.0005557	1	0.0322	0.3873	2	2	PTGS1,PTGS2
Pubmed	17700644	Anxiogenic-like behavioral phenotype of mice deficient in phosphodiesterase 4B (PDE4B).	Pubmed	0.0005557	1	0.0322	0.3873	2	2	PDE4B,PDE4D
Pubmed	31029938	ApoE and clusterin CSF levels influence associations between APOE genotype and changes in CSF tau, but not CSF A?42, levels in non-demented elderly.	Pubmed	0.0005557	1	0.0322	0.3873	2	2	APOE,CLU
Pubmed	20179953	Congenital myotonic dystrophy can show congenital fiber type disproportion pathology.	Pubmed	0.0005557	1	0.0322	0.3873	2	2	ACTA1,TPM3
Pubmed	26198920	Family-based association study of interleukin 6 (IL6) and its receptor (IL6R) functional polymorphisms in schizophrenia in the Polish population.	Pubmed	0.0005557	1	0.0322	0.3873	2	2	IL6,IL6R
Pubmed	18355636	Altered GABAergic neurotransmission is associated with increased kainate-induced seizure in prostaglandin-endoperoxide synthase-2 deficient mice.	Pubmed	0.0005557	1	0.0322	0.3873	2	2	PTGS1,PTGS2
Pubmed	9010205	Assembly of CNS myelin in the absence of proteolipid protein.	Pubmed	0.0005557	1	0.0322	0.3873	2	2	MBP,PLP1
Pubmed	12778454	[Relationship between apolipoprotein E and apolipoprotein B polymorphisms in youths with coronary heart disease].	Pubmed	0.0005557	1	0.0322	0.3873	2	2	APOB,APOE
Pubmed	22095977	G protein-coupled receptor kinase-5 attenuates atherosclerosis by regulating receptor tyrosine kinases and 7-transmembrane receptors.	Pubmed	0.0005557	1	0.0322	0.3873	2	2	APOE,GRK5
Pubmed	11981837	Distinct expression of cyclooxygenase-1 and -2 in the human thymus.	Pubmed	0.0005557	1	0.0322	0.3873	2	2	PTGS1,PTGS2
Pubmed	23866971	Association between In Utero arsenic exposure, placental gene expression, and infant birth weight: a US birth cohort study.	Pubmed	0.0005557	1	0.0322	0.3873	2	2	AQP9,ENPP2
Pubmed	18203900	Dietary soy protein isolate ameliorates atherosclerotic lesions in apolipoprotein E-deficient mice potentially by inhibiting monocyte chemoattractant protein-1 expression.	Pubmed	0.0005557	1	0.0322	0.3873	2	2	CCL2,APOE
Pubmed	19056763	COX-1 vs. COX-2 as a determinant of basal tone in the internal anal sphincter.	Pubmed	0.0005557	1	0.0322	0.3873	2	2	PTGS1,PTGS2
Pubmed	26172301	Multifaceted interactions and regulation between antizyme and its interacting proteins cyclin D1, ornithine decarboxylase and antizyme inhibitor.	Pubmed	0.0005557	1	0.0322	0.3873	2	2	CCND1,ODC1
Pubmed	26413013	Ultrasound Biomicroscopic Imaging for Interleukin-1 Receptor Antagonist-Inhibiting Atherosclerosis and Markers of Inflammation in Atherosclerotic Development in Apolipoprotein-E Knockout Mice.	Pubmed	0.0005557	1	0.0322	0.3873	2	2	APOE,IL1RN
Pubmed	15985430	Involvement of inflammation, degradation, and apoptosis in a mouse model of glaucoma.	Pubmed	0.0005557	1	0.0322	0.3873	2	2	GPNMB,TYRP1
Pubmed	11884416	Processing of pro-atrial natriuretic peptide by corin in cardiac myocytes.	Pubmed	0.0005557	1	0.0322	0.3873	2	2	CORIN,NPPA
Pubmed	22330859	Effects of estrogen on endothelial prostanoid production and cyclooxygenase-2 and heme oxygenase-1 expression.	Pubmed	0.0005557	1	0.0322	0.3873	2	2	HMOX1,PTGS2
Pubmed	20140183	Genetic and functional dissection of HTRA1 and LOC387715 in age-related macular degeneration.	Pubmed	0.0005557	1	0.0322	0.3873	2	2	ARMS2,HTRA1
Pubmed	25956321	Monocytic elastase-mediated apolipoprotein-E degradation: Potential involvement of microglial elastase-like proteases in apolipoprotein-E proteolysis in brains with Alzheimers disease.	Pubmed	0.0005557	1	0.0322	0.3873	2	2	APOE,ELANE
Pubmed	12519124	Transcription of prostanoid receptor genes and cyclooxygenase enzyme genes in cultivated human iridial melanocytes from eyes of different colours.	Pubmed	0.0005557	1	0.0322	0.3873	2	2	PTGS1,PTGS2
Pubmed	19092807	Peptide neurotransmitters activate a cation channel complex of NALCN and UNC-80.	Pubmed	0.0005557	1	0.0322	0.3873	2	2	UNC80,NALCN
Pubmed	8070358	Regulation of the two prostaglandin G/H synthases by parathyroid hormone, interleukin-1, cortisol, and prostaglandin E2 in cultured neonatal mouse calvariae.	Pubmed	0.0005557	1	0.0322	0.3873	2	2	PTGS1,PTGS2
Pubmed	1634363	A new alpha chain variant, Hb Hanamaki or alpha 2(139)(HC1)Lys----Glu beta 2, found in a Japanese family.	Pubmed	0.0005557	1	0.0322	0.3873	2	2	HBA1,HBA2
Pubmed	12054745	Deficiency in sPLA(2) does not affect HDL levels or atherosclerosis in mice.	Pubmed	0.0005557	1	0.0322	0.3873	2	2	APOE,PLA2G2A
Pubmed	26082478	Inhibition of DDAH1, but not DDAH2, results in apoptosis of a human trophoblast cell line in response to TRAIL.	Pubmed	0.0005557	1	0.0322	0.3873	2	2	DDAH2,DDAH1
Pubmed	17178916	Cardiotrophin-1 defends the liver against ischemia-reperfusion injury and mediates the protective effect of ischemic preconditioning.	Pubmed	0.0005557	1	0.0322	0.3873	2	2	CTF1,IL6
Pubmed	23225913	CRIg mediates early Kupffer cell responses to adenovirus.	Pubmed	0.0005557	1	0.0322	0.3873	2	2	C3,VSIG4
Pubmed	20157327	A variant near the interleukin-6 gene is associated with fat mass in Caucasian men.	Pubmed	0.0005557	1	0.0322	0.3873	2	2	IL6,IL6R
Pubmed	22491416	Differentiation of exudative age-related macular degeneration and polypoidal choroidal vasculopathy in the ARMS2/HTRA1 locus.	Pubmed	0.0005557	1	0.0322	0.3873	2	2	ARMS2,HTRA1
Pubmed	25030405	Association between single nucleotide polymorphisms of asporin (ASPN) and BMP5 with the risk of knee osteoarthritis in a Chinese Han population.	Pubmed	0.0005557	1	0.0322	0.3873	2	2	BMP5,ASPN
Pubmed	7601449	Isolation of 115 human chromosome 8-specific expressed-sequence tags by exon amplification.	Pubmed	0.0005557	1	0.0322	0.3873	2	2	AP3M2,RNF122
Pubmed	24447998	Interclass small leucine-rich repeat proteoglycan interactions regulate collagen fibrillogenesis and corneal stromal assembly.	Pubmed	0.0005557	1	0.0322	0.3873	2	2	BGN,LUM
Pubmed	21765894	Heme-oxygenases during erythropoiesis in K562 and human bone marrow cells.	Pubmed	0.0005557	1	0.0322	0.3873	2	2	HMOX1,HMOX2
Pubmed	22768656	Expression of SOCS1, SOCS2, and SOCS3 in growth hormone-stimulated skin fibroblasts from children with idiopathic short stature.	Pubmed	0.0005557	1	0.0322	0.3873	2	2	SOCS2,SOCS3
Pubmed	23212123	Functional regulation of P-glycoprotein at the blood-brain barrier in proton-coupled folate transporter (PCFT) mutant mice.	Pubmed	0.0005557	1	0.0322	0.3873	2	2	SLC46A1,ABCB1
Pubmed	11877091	[Clinical study of P-gp, and bcl-2 protein expression in non-Hodgkin's lymphomas patients].	Pubmed	0.0005557	1	0.0322	0.3873	2	2	BCL2,ABCB1
Pubmed	16678543	Genetically mediated interindividual variation in analgesic responses to cyclooxygenase inhibitory drugs.	Pubmed	0.0005557	1	0.0322	0.3873	2	2	PTGS1,PTGS2
Pubmed	16901895	TTLL7 is a mammalian beta-tubulin polyglutamylase required for growth of MAP2-positive neurites.	Pubmed	0.0005557	1	0.0322	0.3873	2	2	MAP2,TTLL7
Pubmed	16709862	Different stabilities of the structurally related receptors for IgE and IgG on the cell surface are determined by length of the stalk region in their alpha-chains.	Pubmed	0.0005557	1	0.0322	0.3873	2	2	FCER1A,FCGR3A
Pubmed	19819905	Hypoxemia induces expression of heme oxygenase-1 and heme oxygenase-2 proteins in the mouse myocardium.	Pubmed	0.0005557	1	0.0322	0.3873	2	2	HMOX1,HMOX2
Pubmed	16474202	Induction of heme oxygenase-1 inhibits monocyte chemoattractant protein-1 mRNA expression in U937 cells.	Pubmed	0.0005557	1	0.0322	0.3873	2	2	CCL2,HMOX1
Pubmed	15800624	Deletion of active ADAMTS5 prevents cartilage degradation in a murine model of osteoarthritis.	Pubmed	0.0005557	1	0.0322	0.3873	2	2	ADAMTS5,ADAMTS4
Pubmed	12920182	Acetyl-CoA carboxylase 2 mutant mice are protected against obesity and diabetes induced by high-fat/high-carbohydrate diets.	Pubmed	0.0005557	1	0.0322	0.3873	2	2	ACACB,CPT1A
Pubmed	20836851	Hemoglobin ? and ? are ubiquitous in the human lung, decline in idiopathic pulmonary fibrosis but not in COPD.	Pubmed	0.0005557	1	0.0322	0.3873	2	2	HBA1,HBB
Pubmed	25124963	Involvement of IL-6 and IL-1 receptor antagonist on intellectual disability.	Pubmed	0.0005557	1	0.0322	0.3873	2	2	IL1RN,IL6
Pubmed	22915586	Clathrin pit-mediated endocytosis of neutrophil elastase and cathepsin G by cancer cells.	Pubmed	0.0005557	1	0.0322	0.3873	2	2	CTSG,ELANE
Pubmed	9284910	Assignment of the mouse heme oxygenase genes: heme oxygenase-1 (Hmox1) to chromosome 10 band C1 and heme oxygenase-2 (Hmox2) to chromosome 16 band B1.	Pubmed	0.0005557	1	0.0322	0.3873	2	2	HMOX1,HMOX2
Pubmed	16564724	The challenge of understanding ammonium homeostasis and the role of the Rh glycoproteins.	Pubmed	0.0005557	1	0.0322	0.3873	2	2	RHCG,RHAG
Pubmed	18156631	Functional differences of the catalytic and non-catalytic domains in human ADAMTS-4 and ADAMTS-5 in aggrecanolytic activity.	Pubmed	0.0005557	1	0.0322	0.3873	2	2	ADAMTS5,ADAMTS4
Pubmed	26545877	UNC80 mutation causes a syndrome of hypotonia, severe intellectual disability, dyskinesia and dysmorphism, similar to that caused by mutations in its interacting cation channel NALCN.	Pubmed	0.0005557	1	0.0322	0.3873	2	2	UNC80,NALCN
Pubmed	27535802	MASP-3 is the exclusive pro-factor D activator in resting blood: the lectin and the alternative complement pathways are fundamentally linked.	Pubmed	0.0005557	1	0.0322	0.3873	2	2	MASP1,CFD
Pubmed	1958536	Androgen-regulation of ornithine decarboxylase and S-adenosylmethionine decarboxylase genes.	Pubmed	0.0005557	1	0.0322	0.3873	2	2	AMD1,ODC1
Pubmed	24051360	ADAMTS-4 and biglycan are expressed at high levels and co-localize to podosomes during endothelial cell tubulogenesis in vitro.	Pubmed	0.0005557	1	0.0322	0.3873	2	2	BGN,ADAMTS4
Pubmed	18386288	Protease-activated receptor-1 upregulates fibroblast growth factor 7 in stroma of benign prostatic hyperplasia.	Pubmed	0.0005557	1	0.0322	0.3873	2	2	F2R,FGF7
Pubmed	18021798	Essential role of mitochondrial Ca2+-activated and ATP-sensitive K+ channels in sildenafil-induced late cardioprotection.	Pubmed	0.0005557	1	0.0322	0.3873	2	2	KCNJ8,KCNMB1
Pubmed	21334424	Heme oxygenase 1, beneficial role in permanent ischemic stroke and in Gingko biloba (EGb 761) neuroprotection.	Pubmed	0.0005557	1	0.0322	0.3873	2	2	HMOX1,HMOX2
Pubmed	25120750	Clinical value of CD133 and nestin in patients with glioma: a population-based study.	Pubmed	0.0005557	1	0.0322	0.3873	2	2	NES,PROM1
Pubmed	8034330	Chromosomal localization of the human heme oxygenase genes: heme oxygenase-1 (HMOX1) maps to chromosome 22q12 and heme oxygenase-2 (HMOX2) maps to chromosome 16p13.3.	Pubmed	0.0005557	1	0.0322	0.3873	2	2	HMOX1,HMOX2
Pubmed	21898505	Glucocorticoids increase interleukin-6-dependent gene induction by interfering with the expression of the suppressor of cytokine signaling 3 feedback inhibitor.	Pubmed	0.0005557	1	0.0322	0.3873	2	2	SOCS3,IL6
Pubmed	18297066	A molecular pathway of neurodegeneration linking alpha-synuclein to ApoE and Abeta peptides.	Pubmed	0.0005557	1	0.0322	0.3873	2	2	APOE,SNCA
Pubmed	26868429	Heme Oxygenase-1 and 2 Common Genetic Variants and Risk for Multiple Sclerosis.	Pubmed	0.0005557	1	0.0322	0.3873	2	2	HMOX1,HMOX2
Pubmed	15003452	Crystal structures of the catalytic domain of phosphodiesterase 4B complexed with AMP, 8-Br-AMP, and rolipram.	Pubmed	0.0005557	1	0.0322	0.3873	2	2	PDE4B,PDE4D
Pubmed	16230502	Delayed arteriogenesis in hypercholesterolemic mice.	Pubmed	0.0005557	1	0.0322	0.3873	2	2	APOB,APOE
Pubmed	20157352	Genetic analysis of typical wet-type age-related macular degeneration and polypoidal choroidal vasculopathy in Japanese population.	Pubmed	0.0005557	1	0.0322	0.3873	2	2	ARMS2,HTRA1
Pubmed	26700310	Potential crosstalk of the interleukin-6-heme oxygenase-1-dependent mechanism involved in resistance to lenalidomide in multiple myeloma cells.	Pubmed	0.0005557	1	0.0322	0.3873	2	2	HMOX1,IL6
Pubmed	20854119	Spectrum of ?-globin gene mutations in the Kerman Province of Iran.	Pubmed	0.0005557	1	0.0322	0.3873	2	2	HBA1,HBA2
Pubmed	27178356	LNGFR(+)THY-1(+) human pluripotent stem cell-derived neural crest-like cells have the potential to develop into mesenchymal stem cells.	Pubmed	0.0005557	1	0.0322	0.3873	2	2	NGFR,THY1
Pubmed	2164060	Elastase and cathepsin G of human monocytes: heterogeneity and subcellular localization to peroxidase-positive granules.	Pubmed	0.0005557	1	0.0322	0.3873	2	2	CTSG,ELANE
Pubmed	24681566	Signaling by IL-6 promotes alternative activation of macrophages to limit endotoxemia and obesity-associated resistance to insulin.	Pubmed	0.0005557	1	0.0322	0.3873	2	2	IL6,IL6R
Pubmed	8232588	Bcl-2 associates with the ras-related protein R-ras p23.	Pubmed	0.0005557	1	0.0322	0.3873	2	2	RRAS,BCL2
Pubmed	28383049	Suppressor of Cytokine Signaling 2 Negatively Regulates NK Cell Differentiation by Inhibiting JAK2 Activity.	Pubmed	0.0005557	1	0.0322	0.3873	2	2	SOCS2,JAK2
Pubmed	25118265	Loss of outer retinal neurons and circuitry alterations in the DBA/2J mouse.	Pubmed	0.0005557	1	0.0322	0.3873	2	2	GPNMB,TYRP1
Pubmed	25139985	Experimental basis for a new allosteric model for multisubunit proteins.	Pubmed	0.0005557	1	0.0322	0.3873	2	2	HBA1,HBB
Pubmed	26385185	Induction of HO-1 by carbon monoxide releasing molecule-2 attenuates thrombin-induced COX-2 expression and hypertrophy in primary human cardiomyocytes.	Pubmed	0.0005557	1	0.0322	0.3873	2	2	HMOX1,PTGS2
Pubmed	20456446	LOC387715/HTRA1 polymorphisms, smoking and combined effects on exudative age-related macular degeneration in a Korean population.	Pubmed	0.0005557	1	0.0322	0.3873	2	2	ARMS2,HTRA1
Pubmed	1380156	Human cyclooxygenase-2 cDNA.	Pubmed	0.0005557	1	0.0322	0.3873	2	2	PTGS1,PTGS2
Pubmed	31304855	The Spectrum of ?-Thalassemia Mutations in the Lak Population of Iran.	Pubmed	0.0005557	1	0.0322	0.3873	2	2	HBA1,HBA2
Pubmed	17173877	The superficial layers of the superior colliculus are cytoarchitectually and myeloarchitectually disorganized in the reelin-deficient mouse, reeler.	Pubmed	0.0005557	1	0.0322	0.3873	2	2	ASIP,RELN
Pubmed	22324945	Interleukin-6 upregulates expression of ADAMTS-4 in fibroblast-like synoviocytes from patients with rheumatoid arthritis.	Pubmed	0.0005557	1	0.0322	0.3873	2	2	ADAMTS4,IL6
Pubmed	24349465	Identification of putative target genes of the transcription factor RUNX2.	Pubmed	0.0005557	1	0.0322	0.3873	2	2	BIRC3,RUNX2
Pubmed	26657859	The chondrocyte clock gene Bmal1 controls cartilage homeostasis and integrity.	Pubmed	0.0005557	1	0.0322	0.3873	2	2	ARNTL,PER2
Pubmed	28466804	Interleukin-6 and soluble interleukin-6 receptor are elevated in large-vessel vasculitis: a cross-sectional and longitudinal study.	Pubmed	0.0005557	1	0.0322	0.3873	2	2	IL6,IL6R
Pubmed	9413174	Bcl-2 and mdr-1 gene expression during doxorubicin-induced apoptosis in murine leukemic P388 and P388/R84 cells.	Pubmed	0.0005557	1	0.0322	0.3873	2	2	BCL2,ABCB1
Pubmed	17728706	Deficiency of heme oxygenase-1 impairs renal hemodynamics and exaggerates systemic inflammatory responses to renal ischemia.	Pubmed	0.0005557	1	0.0322	0.3873	2	2	HMOX1,IL6
Pubmed	26356819	Stathmin 1 inhibition amplifies ruxolitinib-induced apoptosis in JAK2V617F cells.	Pubmed	0.0005557	1	0.0322	0.3873	2	2	JAK2,STMN1
Pubmed	21255427	Athletic humans and horses: comparative analysis of interleukin-6 (IL-6) and IL-6 receptor (IL-6R) expression in peripheral blood mononuclear cells in trained and untrained subjects at rest.	Pubmed	0.0005557	1	0.0322	0.3873	2	2	IL6,IL6R
Pubmed	23274856	CTGF induces monocyte chemoattractant protein-1 expression to enhance monocyte migration in human synovial fibroblasts.	Pubmed	0.0005557	1	0.0322	0.3873	2	2	CCL2,CCN2
Pubmed	22980031	Recombinant IL-6 treatment protects mice from organ specific autoimmune disease by IL-6 classical signalling-dependent IL-1ra induction.	Pubmed	0.0005557	1	0.0322	0.3873	2	2	IL1RN,IL6
Pubmed	26185250	Inflammation. Neutrophil extracellular traps license macrophages for cytokine production in atherosclerosis.	Pubmed	0.0005557	1	0.0322	0.3873	2	2	APOE,ELANE
Pubmed	17996891	Corin is co-expressed with pro-ANP and localized on the cardiomyocyte surface in both zymogen and catalytically active forms.	Pubmed	0.0005557	1	0.0322	0.3873	2	2	CORIN,NPPA
Pubmed	16079911	Fhl2 deficiency results in osteopenia due to decreased activity of osteoblasts.	Pubmed	0.0005557	1	0.0322	0.3873	2	2	FHL2,RUNX2
Pubmed	18782767	Identification of neutral cholesterol ester hydrolase, a key enzyme removing cholesterol from macrophages.	Pubmed	0.0005557	1	0.0322	0.3873	2	2	NCEH1,APOE
Pubmed	14625295	Role of Asn-382 and Thr-383 in activation and inactivation of human prostaglandin H synthase cyclooxygenase catalysis.	Pubmed	0.0005557	1	0.0322	0.3873	2	2	PTGS1,PTGS2
Pubmed	17225872	Retinoic acid, GABA-ergic, and TGF-beta signaling systems are involved in human cleft palate fibroblast phenotype.	Pubmed	0.0005557	1	0.0322	0.3873	2	2	GABRB3,TGFB3
Pubmed	29930002	Diabetic Vascular Calcification Mediated by the Collagen Receptor Discoidin Domain Receptor 1 via the Phosphoinositide 3-Kinase/Akt/Runt-Related Transcription Factor 2 Signaling Axis.	Pubmed	0.0005557	1	0.0322	0.3873	2	2	DDR1,RUNX2
Pubmed	22753384	Deficient production of IL-1 receptor antagonist and IL-6 coupled to oxidative stress in cryopyrin-associated periodic syndrome monocytes.	Pubmed	0.0005557	1	0.0322	0.3873	2	2	IL1RN,IL6
Pubmed	24469308	Cell-type-specific roles for COX-2 in UVB-induced skin cancer.	Pubmed	0.0005557	1	0.0322	0.3873	2	2	PTGS1,PTGS2
Pubmed	20484496	Upregulation of the chemokine (C-C motif) ligand 2 via a severe acute respiratory syndrome coronavirus spike-ACE2 signaling pathway.	Pubmed	0.0005557	1	0.0322	0.3873	2	2	CCL2,ACE2
Pubmed	25164664	Deletion of prostaglandin E2 synthesizing enzymes in brain endothelial cells attenuates inflammatory fever.	Pubmed	0.0005557	1	0.0322	0.3873	2	2	PTGS1,PTGS2
Pubmed	15720413	Mucosal expression of cyclooxygenase isoforms 1 and 2 is increased with worsening damage to the gastric mucosa.	Pubmed	0.0005557	1	0.0322	0.3873	2	2	PTGS1,PTGS2
Pubmed	29255171	ERBB3 and NGFR mark a distinct skeletal muscle progenitor cell in human development and hPSCs.	Pubmed	0.0005557	1	0.0322	0.3873	2	2	ERBB3,NGFR
Pubmed	24468132	Cyclin D1 amplification in multiple myeloma is associated with multidrug resistance expression.	Pubmed	0.0005557	1	0.0322	0.3873	2	2	CCND1,ABCB1
Pubmed	28544625	A mutation in GABRB3 associated with Dravet syndrome.	Pubmed	0.0005557	1	0.0322	0.3873	2	2	SCN1A,GABRB3
Pubmed	24826793	Novel point mutation of the ?2-globin gene (HBA2) and a rare 2.4?kb deletion of the ?1-globin gene (HBA1), identified in two chinese patients with Hb H disease.	Pubmed	0.0005557	1	0.0322	0.3873	2	2	HBA1,HBA2
Pubmed	23564454	Minimal interleukin 6 (IL-6) receptor stalk composition for IL-6 receptor shedding and IL-6 classic signaling.	Pubmed	0.0005557	1	0.0322	0.3873	2	2	IL6,IL6R
Pubmed	15078883	Neutrophil serine proteinases inactivate surfactant protein D by cleaving within a conserved subregion of the carbohydrate recognition domain.	Pubmed	0.0005557	1	0.0322	0.3873	2	2	CTSG,ELANE
Pubmed	12673836	Effect of alpha-globin genotype on the pathophysiology of sickle cell disease.	Pubmed	0.0005557	1	0.0322	0.3873	2	2	HBA1,HBA2
Pubmed	20816090	Interleukin-6 signaling in liver-parenchymal cells suppresses hepatic inflammation and improves systemic insulin action.	Pubmed	0.0005557	1	0.0322	0.3873	2	2	IL6,IL6R
Pubmed	28213822	Effect of lipopolysaccharide on circadian clock genes Per2 and Bmal1 in mouse ovary.	Pubmed	0.0005557	1	0.0322	0.3873	2	2	ARNTL,PER2
Pubmed	30108257	Isoform-Specific Compensation of Cyclooxygenase (Ptgs) Genes during Implantation and Late-Stage Pregnancy.	Pubmed	0.0005557	1	0.0322	0.3873	2	2	PTGS1,PTGS2
Pubmed	18214026	COX1 and COX2 polymorphisms and gastric cancer risk in a Polish population.	Pubmed	0.0005557	1	0.0322	0.3873	2	2	PTGS1,PTGS2
Pubmed	15754411	Relationship between expression and distribution of cyclooxygenase-2 and bcl-2 in human gastric adenocarcinoma.	Pubmed	0.0005557	1	0.0322	0.3873	2	2	BCL2,PTGS2
Pubmed	24758697	Role of cyclooxygenase isoforms in the altered excitatory motor pathways of human colon with diverticular disease.	Pubmed	0.0005557	1	0.0322	0.3873	2	2	PTGS1,PTGS2
Pubmed	23792437	Dysregulated heme oxygenase-ferritin system in pterygium pathogenesis.	Pubmed	0.0005557	1	0.0322	0.3873	2	2	HMOX1,HMOX2
Pubmed	27390295	An Autotaxin/Lysophosphatidic Acid/Interleukin-6 Amplification Loop Drives Scleroderma Fibrosis.	Pubmed	0.0005557	1	0.0322	0.3873	2	2	ENPP2,IL6
Pubmed	17129575	High molecular weight adiponectin reduces apolipoprotein B and E release in human hepatocytes.	Pubmed	0.0005557	1	0.0322	0.3873	2	2	APOB,APOE
Pubmed	28038380	The P2Y2 nucleotide receptor is an inhibitor of vascular calcification.	Pubmed	0.0005557	1	0.0322	0.3873	2	2	APOE,P2RY2
Pubmed	16049480	Genes that mediate breast cancer metastasis to lung.	Pubmed	0.0005557	1	0.0322	0.3873	2	2	FSCN1,ANGPTL4
Pubmed	6547932	The characterization of hemoglobin Manitoba or alpha (2)102(G9)Ser----Arg beta 2 and hemoglobin Contaldo or alpha (2)103(G10)His----Arg beta 2 by high performance liquid chromatography.	Pubmed	0.0005557	1	0.0322	0.3873	2	2	HBA1,HBA2
Pubmed	20951753	Association of IL-6 and IL-6R gene polymorphisms with susceptibility to respiratory tract infections in young Finnish men.	Pubmed	0.0005557	1	0.0322	0.3873	2	2	IL6,IL6R
Pubmed	26999594	IL-6 Signaling in Myelomonocytic Cells Is Not Crucial for the Development of IMQ-Induced Psoriasis.	Pubmed	0.0005557	1	0.0322	0.3873	2	2	IL6,IL6R
Pubmed	7358733	Sites of nonenzymatic glycosylation of human hemoglobin A.	Pubmed	0.0005557	1	0.0322	0.3873	2	2	HBA1,HBB
Pubmed	9463402	Compensatory prostaglandin E2 biosynthesis in cyclooxygenase 1 or 2 null cells.	Pubmed	0.0005557	1	0.0322	0.3873	2	2	PTGS1,PTGS2
Pubmed	28232786	Fine-Tuning Circadian Rhythms: The Importance of	Pubmed	0.0005557	1	0.0322	0.3873	2	2	ARNTL,PER2
Pubmed	16272346	Contrasting effects of cyclooxygenase-1 (COX-1) and COX-2 deficiency on the host response to influenza A viral infection.	Pubmed	0.0005557	1	0.0322	0.3873	2	2	PTGS1,PTGS2
Pubmed	22156015	CD133 expression and identification of CD133/nestin positive cells in rhabdomyosarcomas and rhabdomyosarcoma cell lines.	Pubmed	0.0005557	1	0.0322	0.3873	2	2	NES,PROM1
Pubmed	18378678	The LIM-only protein FHL2 regulates cyclin D1 expression and cell proliferation.	Pubmed	0.0005557	1	0.0322	0.3873	2	2	FHL2,CCND1
Pubmed	24806679	Combined effects of Alzheimer risk variants in the CLU and ApoE genes on ventricular expansion patterns in the elderly.	Pubmed	0.0005557	1	0.0322	0.3873	2	2	APOE,CLU
Pubmed	16857891	Inhibition of cyclooxygenase isoforms in late- but not midgestation decreases contractility of the ductus arteriosus and prevents postnatal closure in mice.	Pubmed	0.0005557	1	0.0322	0.3873	2	2	PTGS1,PTGS2
Pubmed	11553796	CR16 forms a complex with N-WASP in brain and is a novel member of a conserved proline-rich actin-binding protein family.	Pubmed	0.0005557	1	0.0322	0.3873	2	2	WIPF3,VSTM2L
Pubmed	24786121	Differential expression patterns of a disintegrin and metalloproteinase with thrombospondin motifs (ADAMTS) -1, -4, -5, and -14 in human placenta and gestational trophoblastic diseases.	Pubmed	0.0005557	1	0.0322	0.3873	2	2	ADAMTS5,ADAMTS4
Pubmed	24641411	Association of single nucleotide polymorphisms in the prostaglandin-endoperoxide synthase 2 (PTGS2) and phospholipase A? group IIA (PLA2G2A) genes with susceptibility to esophageal squamous cell carcinoma.	Pubmed	0.0005557	1	0.0322	0.3873	2	2	PLA2G2A,PTGS2
Pubmed	25858550	Latent transforming growth factor-? binding proteins (LTBP-1 and LTBP-2) and gingiva keratinization.	Pubmed	0.0005557	1	0.0322	0.3873	2	2	LTBP1,LTBP2
Pubmed	4007963	Close linkage between mouse genes determining the two forms of complement component C6 and component C7, and cis action of a C6 regulatory gene.	Pubmed	0.0005557	1	0.0322	0.3873	2	2	C6,C7
Pubmed	28843803	Downregulation of Apolipoprotein-E and Apolipoprotein-J in Moyamoya Disease-A Proteome Analysis of Cerebrospinal Fluid.	Pubmed	0.0005557	1	0.0322	0.3873	2	2	APOE,CLU
Pubmed	28931607	Direct observation of conformational population shifts in crystalline human hemoglobin.	Pubmed	0.0005557	1	0.0322	0.3873	2	2	HBA1,HBB
Pubmed	14615405	Effect of glucose and oxygen deprivation on heme oxygenase expression in human chorionic villi explants and immortalized trophoblast cells.	Pubmed	0.0005557	1	0.0322	0.3873	2	2	HMOX1,HMOX2
Pubmed	21229891	Transcriptional regulation of interleukin 6 and its receptor in colon cancer cells by phytic acid.	Pubmed	0.0005557	1	0.0322	0.3873	2	2	IL6,IL6R
Pubmed	20720307	Prostaglandin-endoperoxide synthase genes COX1 and COX2 - novel modifiers of disease severity in cystic fibrosis patients.	Pubmed	0.0005557	1	0.0322	0.3873	2	2	PTGS1,PTGS2
Pubmed	17703315	The proinflammatory CXC-chemokines GRO-alpha/CXCL1 and MIG/CXCL9 are concomitantly expressed in ulcerative colitis and decrease during treatment with topical corticosteroids.	Pubmed	0.0005557	1	0.0322	0.3873	2	2	CXCL9,CXCL1
Pubmed	11786382	Dual role of the tyrosine kinase GTK and the adaptor protein SHB in beta-cell growth: enhanced beta-cell replication after 60% pancreatectomy and increased sensitivity to streptozotocin.	Pubmed	0.0005557	1	0.0322	0.3873	2	2	SHB,FRK
Pubmed	20617559	TNF-alpha similarly induces IL-6 and MCP-1 in fibroblasts from colorectal liver metastases and normal liver fibroblasts.	Pubmed	0.0005557	1	0.0322	0.3873	2	2	CCL2,IL6
Pubmed	26542580	Pancreatic ? cell enhancers regulate rhythmic transcription of genes controlling insulin secretion.	Pubmed	0.0005557	1	0.0322	0.3873	2	2	ARNTL,PER2
Pubmed	15084473	The COX-2 pathway is essential during early stages of skeletal muscle regeneration.	Pubmed	0.0005557	1	0.0322	0.3873	2	2	PTGS1,PTGS2
Pubmed	3165083	Genes on chromosomes 1 and 4 in the mouse are associated with repair of radiation-induced chromatin damage.	Pubmed	0.0005557	1	0.0322	0.3873	2	2	BCL2,NPPA
Pubmed	10683376	Impaired mucosal defense to acute colonic injury in mice lacking cyclooxygenase-1 or cyclooxygenase-2.	Pubmed	0.0005557	1	0.0322	0.3873	2	2	PTGS1,PTGS2
Pubmed	12576525	Role of cyclooxygenases COX-1 and COX-2 in modulating adipogenesis in 3T3-L1 cells.	Pubmed	0.0005557	1	0.0322	0.3873	2	2	PTGS1,PTGS2
Pubmed	14649314	Three new hemoglobin variants with abnormal oxygen affinity: Hb Saratoga Springs [alpha40(C5)Lys --> Asn (alpha1)], Hb Santa Clara [beta97(FG4)His --> Asn], and Hb Sparta [beta103(G5)Phe --> Val].	Pubmed	0.0005557	1	0.0322	0.3873	2	2	HBA1,HBB
Pubmed	22848642	Monocyte chemoattractant protein-1 secreted by decidual stromal cells inhibits NK cells cytotoxicity by up-regulating expression of SOCS3.	Pubmed	0.0005557	1	0.0322	0.3873	2	2	CCL2,SOCS3
Pubmed	11078829	UV-induced expression of GADD45 is mediated by an oxidant sensitive pathway in cultured human keratinocytes and in human skin in vivo.	Pubmed	0.0005557	1	0.0322	0.3873	2	2	GADD45B,GADD45G
Pubmed	16966352	Expression and regulation of heme oxygenase isozymes in the developing mouse cortex.	Pubmed	0.0005557	1	0.0322	0.3873	2	2	HMOX1,HMOX2
Pubmed	12846905	The Rh complex exports ammonium from human red blood cells.	Pubmed	0.0005557	1	0.0322	0.3873	2	2	RHCG,RHAG
Pubmed	16115753	Intron 1 retaining cyclooxygenase 1 splice variant is induced by osmotic stress in human intestinal epithelial cells.	Pubmed	0.0005557	1	0.0322	0.3873	2	2	PTGS1,PTGS2
Pubmed	19919527	Regulation of multiple cytokine signalling pathways by SOCS3 is independent of SOCS2.	Pubmed	0.0005557	1	0.0322	0.3873	2	2	SOCS2,SOCS3
Pubmed	20137666	[Visfatin promotes production of monocyte chemotactic protein-1 and interleukin-6 in human endothelial cells via insulin receptor].	Pubmed	0.0005557	1	0.0322	0.3873	2	2	CCL2,IL6
Pubmed	17890443	Influence of ScaI and natriuretic peptide (NP) clearance receptor polymorphisms of the NP System on NP concentration in chronic heart failure.	Pubmed	0.0005557	1	0.0322	0.3873	2	2	NPPA,NPR3
Pubmed	19255159	Localization of age-related macular degeneration-associated ARMS2 in cytosol, not mitochondria.	Pubmed	0.0005557	1	0.0322	0.3873	2	2	ARMS2,HTRA1
Pubmed	12112320	Inhibition of proliferation and expression of T1 and cyclin D1 genes by thyroid hormone in mammary epithelial cells.	Pubmed	0.0005557	1	0.0322	0.3873	2	2	CCND1,IL1RL1
Pubmed	23582716	IL-6 and its receptors in coronary artery disease and acute myocardial infarction.	Pubmed	0.0005557	1	0.0322	0.3873	2	2	IL6,IL6R
Pubmed	8206089	Transforming growth factor-beta 2 induces apoptosis of murine T cell clones without down-regulating bcl-2 mRNA expression.	Pubmed	0.0005557	1	0.0322	0.3873	2	2	BCL2,TGFB2
Pubmed	28687372	Effects of a free-choice high-fat high-sugar diet on brain PER2 and BMAL1 protein expression in mice.	Pubmed	0.0005557	1	0.0322	0.3873	2	2	ARNTL,PER2
Pubmed	26081267	Genetic Variants in Cyclooxygenase-2 Contribute to Post-treatment Pain among Endodontic Patients.	Pubmed	0.0005557	1	0.0322	0.3873	2	2	PTGS1,PTGS2
Pubmed	8269866	Jimpy mutation affects astrocytes: lengthening of the cell cycle in vitro.	Pubmed	0.0005557	1	0.0322	0.3873	2	2	PLP1,EDA
Pubmed	25864768	The heme oxygenase/biliverdin reductase system in skin cancers.	Pubmed	0.0005557	1	0.0322	0.3873	2	2	HMOX1,HMOX2
Pubmed	11487204	Decreased platelet glutamate uptake and genetic risk factors in patients with Parkinson's disease.	Pubmed	0.0005557	1	0.0322	0.3873	2	2	APOE,SNCA
Pubmed	11488419	Immunohistochemical localization of members of the transforming growth factor (TGF)-beta superfamily in normal human salivary glands and pleomorphic adenomas.	Pubmed	0.0005557	1	0.0322	0.3873	2	2	TGFB2,TGFB3
Pubmed	19229050	SOCS3 tyrosine phosphorylation as a potential bio-marker for myeloproliferative neoplasms associated with mutant JAK2 kinases.	Pubmed	0.0005557	1	0.0322	0.3873	2	2	SOCS3,JAK2
Pubmed	9346237	Multiple female reproductive failures in cyclooxygenase 2-deficient mice.	Pubmed	0.0005557	1	0.0322	0.3873	2	2	PTGS1,PTGS2
Pubmed	19553474	{alpha}-synuclein and its A30P mutant affect actin cytoskeletal structure and dynamics.	Pubmed	0.0005557	1	0.0322	0.3873	2	2	ACTA1,SNCA
Pubmed	21406183	Stimulation of the glucose carrier SGLT1 by JAK2.	Pubmed	0.0005557	1	0.0322	0.3873	2	2	SLC5A1,JAK2
Pubmed	11173882	Genetic association between Alzheimer disease and the alpha-synuclein gene.	Pubmed	0.0005557	1	0.0322	0.3873	2	2	APOE,SNCA
Pubmed	29123207	Atropine augments cardiac contractility by inhibiting cAMP-specific phosphodiesterase type 4.	Pubmed	0.0005557	1	0.0322	0.3873	2	2	PDE4B,PDE4D
Pubmed	24886605	Genetic modulation of the interleukin 6 (IL-6) system in patients with advanced gastric cancer: a background for an alternative target therapy.	Pubmed	0.0005557	1	0.0322	0.3873	2	2	IL6,IL6R
Pubmed	19422643	Potential roles for the small leucine-rich proteoglycans biglycan and fibromodulin in ectopic ossification of tendon induced by exercise and in modulating rotarod performance.	Pubmed	0.0005557	1	0.0322	0.3873	2	2	FMOD,BGN
Pubmed	11024467	Crystal structure of S-glutathiolated carbonic anhydrase III.	Pubmed	0.0005557	1	0.0322	0.3873	2	2	GLRX,CA3
Pubmed	28137267	Targeting CD133 improves chemotherapeutic efficacy of recurrent pediatric pilocytic astrocytoma following prolonged chemotherapy.	Pubmed	0.0005557	1	0.0322	0.3873	2	2	PROM1,ABCB1
Pubmed	25767273	Absence of Four-and-a-Half LIM Domain Protein 2 Decreases Atherosclerosis in ApoE-/- Mice.	Pubmed	0.0005557	1	0.0322	0.3873	2	2	FHL2,APOE
Pubmed	21266548	Molecular basis for ubiquitin and ISG15 cross-reactivity in viral ovarian tumor domains.	Pubmed	0.0005557	1	0.0322	0.3873	2	2	ISG15,TRIM25
Pubmed	19939495	MBL-associated serine protease-3 circulates in high serum concentrations predominantly in complex with Ficolin-3 and regulates Ficolin-3 mediated complement activation.	Pubmed	0.0005557	1	0.0322	0.3873	2	2	FCN3,MASP1
Pubmed	12412787	Role of the interleukin-6/interleukin-6 soluble receptor cytokine system in mediating increased skeletal sensitivity to parathyroid hormone in perimenopausal women.	Pubmed	0.0005557	1	0.0322	0.3873	2	2	IL6,IL6R
Pubmed	21647550	An association between polymorphism of the heme oxygenase-1 and -2 genes and age-related macular degeneration.	Pubmed	0.0005557	1	0.0322	0.3873	2	2	HMOX1,HMOX2
Pubmed	16930602	Placental tissue cyclo-oxygenase 1 and 2 in pre-eclamptic and normal pregnancy.	Pubmed	0.0005557	1	0.0322	0.3873	2	2	PTGS1,PTGS2
Pubmed	15192113	ADAMTS7B, the full-length product of the ADAMTS7 gene, is a chondroitin sulfate proteoglycan containing a mucin domain.	Pubmed	0.0005557	1	0.0322	0.3873	2	2	ADAMTS7,ADAMTS4
Pubmed	22099397	BMP-7/TGF-?1 signalling in myoblasts: components involved in signalling and BMP-7-dependent blockage of TGF-?-mediated CTGF expression.	Pubmed	0.0005557	1	0.0322	0.3873	2	2	BMP7,CCN2
Pubmed	16287712	Gadd45 beta and Gadd45 gamma are critical for regulating autoimmunity.	Pubmed	0.0005557	1	0.0322	0.3873	2	2	GADD45B,GADD45G
Pubmed	15451306	Reduced sulfur mustard-induced skin toxicity in cyclooxygenase-2 knockout and celecoxib-treated mice.	Pubmed	0.0005557	1	0.0322	0.3873	2	2	PTGS1,PTGS2
Pubmed	31136603	A reductionist, in vitro model of environmental circadian disruption demonstrates SCN-independent and tissue-specific dysregulation of inflammatory responses.	Pubmed	0.0005557	1	0.0322	0.3873	2	2	ARNTL,PER2
Pubmed	21191724	Haplotype analysis of the ARMS2/HTRA1 region in Japanese patients with typical neovascular age-related macular degeneration or polypoidal choroidal vasculopathy.	Pubmed	0.0005557	1	0.0322	0.3873	2	2	ARMS2,HTRA1
Pubmed	11444591	Obesity is induced in mice heterozygous for cyclooxygenase-2.	Pubmed	0.0005557	1	0.0322	0.3873	2	2	PTGS1,PTGS2
Pubmed	30229288	Lysophosphatidylcholine induces cyclooxygenase-2-dependent IL-6 expression in human cardiac fibroblasts.	Pubmed	0.0005557	1	0.0322	0.3873	2	2	IL6,PTGS2
Pubmed	10954756	Nociception in cyclooxygenase isozyme-deficient mice.	Pubmed	0.0005557	1	0.0322	0.3873	2	2	PTGS1,PTGS2
Pubmed	17920577	alpha/beta-Globin mRNA ratio determination by multiplex quantitative real-time reverse transcription-polymerase chain reaction as an indicator of globin gene function.	Pubmed	0.0005557	1	0.0322	0.3873	2	2	HBA2,HBB
Pubmed	5639009	Hemoglobin-Bibba or alpha-2-136Pro-beta 2, an unstable alpha chain abnormal hemoglobin.	Pubmed	0.0005557	1	0.0322	0.3873	2	2	HBA1,HBA2
Pubmed	17885681	A cardiac myosin light chain kinase regulates sarcomere assembly in the vertebrate heart.	Pubmed	0.0005557	1	0.0322	0.3873	2	2	MYL2,MYLK3
Pubmed	20064929	P2Y2 nucleotide receptors mediate metalloprotease-dependent phosphorylation of epidermal growth factor receptor and ErbB3 in human salivary gland cells.	Pubmed	0.0005557	1	0.0322	0.3873	2	2	ERBB3,P2RY2
Pubmed	29676940	Differential compensation of two cyclooxygenases in renal homeostasis is independent of prostaglandin-synthetic capacity under basal conditions.	Pubmed	0.0005557	1	0.0322	0.3873	2	2	PTGS1,PTGS2
Pubmed	19433337	Peroxide-induced radical formation at TYR385 and TYR504 in human PGHS-1.	Pubmed	0.0005557	1	0.0322	0.3873	2	2	PTGS1,PTGS2
Pubmed	27845343	Directed transport of neutrophil-derived extracellular vesicles enables platelet-mediated innate immune response.	Pubmed	0.0005557	1	0.0322	0.3873	2	2	PTGS1,PTGS2
Pubmed	1417776	Isolation of cDNA clones for a 50 kDa glycoprotein of the human erythrocyte membrane associated with Rh (rhesus) blood-group antigen expression.	Pubmed	0.0005557	1	0.0322	0.3873	2	2	RHCG,RHAG
Pubmed	11357958	Parkinson's disease is not associated with the combined alpha-synuclein/apolipoprotein E susceptibility genotype.	Pubmed	0.0005557	1	0.0322	0.3873	2	2	APOE,SNCA
Pubmed	21693148	Parkinson's disease-associated mutations in ?-synuclein and UCH-L1 inhibit the unconventional secretion of UCH-L1.	Pubmed	0.0005557	1	0.0322	0.3873	2	2	SNCA,UCHL1
Pubmed	21138941	SMAD signaling drives heart and muscle dysfunction in a Drosophila model of muscular dystrophy.	Pubmed	0.0005557	1	0.0322	0.3873	2	2	SGCD,SGCG
Pubmed	14657344	The hyperpolarization-activated channel HCN4 is required for the generation of pacemaker action potentials in the embryonic heart.	Pubmed	0.0005557	1	0.0322	0.3873	2	2	MYL2,HCN4
Pubmed	25629269	Prolactin increases expression of cytoskeletal proteins in SK-N-SH cells.	Pubmed	0.0005557	1	0.0322	0.3873	2	2	MAP2,NES
Pubmed	19926832	Absence of myeloid COX-2 attenuates acute inflammation but does not influence development of atherosclerosis in apolipoprotein E null mice.	Pubmed	0.0005557	1	0.0322	0.3873	2	2	APOE,PTGS2
Pubmed	24578002	In-depth comparative characterization of hemoglobin glycation in normal and diabetic bloods by LC-MSMS.	Pubmed	0.0005557	1	0.0322	0.3873	2	2	HBA1,HBB
Pubmed	18771989	Association of cyclooxygenase-2 and interleukin-1 receptor antagonist gene polymorphisms with the time interval between labor induction and delivery.	Pubmed	0.0005557	1	0.0322	0.3873	2	2	IL1RN,PTGS2
Pubmed	23936461	Regulation of A1 by OX40 contributes to CD8(+) T cell survival and anti-tumor activity.	Pubmed	0.0005557	1	0.0322	0.3873	2	2	BCL2,TNFRSF4
Pubmed	7850809	Molecular analysis of the cytokine network involved in cachexia in colon 26 adenocarcinoma-bearing mice.	Pubmed	0.0005557	1	0.0322	0.3873	2	2	IL1RN,IL6
Pubmed	10964474	Endogenous and ectopic gland induction by FGF-10.	Pubmed	0.0005557	1	0.0322	0.3873	2	2	FGF7,FGF10
Pubmed	28128332	Combination of IL-6 and sIL-6R differentially regulate varying levels of RANKL-induced osteoclastogenesis through NF-?B, ERK and JNK signaling pathways.	Pubmed	0.0005557	1	0.0322	0.3873	2	2	IL6,IL6R
Pubmed	21821913	IgE stimulates human and mouse arterial cell apoptosis and cytokine expression and promotes atherogenesis in Apoe-/- mice.	Pubmed	0.0005557	1	0.0322	0.3873	2	2	FCER1A,APOE
Pubmed	27491335	Loss of ADAMTS4 reduces high fat diet-induced atherosclerosis and enhances plaque stability in ApoE(-/-) mice.	Pubmed	0.0005557	1	0.0322	0.3873	2	2	APOE,ADAMTS4
Pubmed	26638215	Effect of estrogen and/or progesterone administration on traumatic brain injury-caused brain edema: the changes of aquaporin-4 and interleukin-6.	Pubmed	0.0005557	1	0.0322	0.3873	2	2	AQP4,IL6
Pubmed	20676107	Reciprocal coupling of coagulation and innate immunity via neutrophil serine proteases.	Pubmed	0.0005557	1	0.0322	0.3873	2	2	CTSG,ELANE
Pubmed	24032723	Interleukin-6 level and gene polymorphism in spontaneous miscarriage.	Pubmed	0.0005557	1	0.0322	0.3873	2	2	IL6,IL6R
Pubmed	15094479	Frequency and transmission of glutamate receptors GRIK2 and GRIK3 polymorphisms in patients with obsessive compulsive disorder.	Pubmed	0.0005557	1	0.0322	0.3873	2	2	GRIK2,GRIK3
Pubmed	26010074	Interleukin-6 and interleukin-6 receptor expression, localization, and involvement in pain-sensing neuron activation in a mouse intervertebral disc injury model.	Pubmed	0.0005557	1	0.0322	0.3873	2	2	IL6,IL6R
Pubmed	19118095	ATP-induced vasodilation and purinergic receptors in the human leg: roles of nitric oxide, prostaglandins, and adenosine.	Pubmed	0.0005557	1	0.0322	0.3873	2	2	P2RX1,P2RY2
Pubmed	24694612	Differential expression of ETS family transcription factors in NCCIT human embryonic carcinoma cells upon retinoic acid-induced differentiation.	Pubmed	0.0005557	1	0.0322	0.3873	2	2	ETV4,ELF3
Pubmed	24565956	A prospective study of macrophage inhibitory cytokine-1 (MIC-1/GDF15) and risk of colorectal cancer.	Pubmed	0.0005557	1	0.0322	0.3873	2	2	GDF15,PTGS2
Pubmed	7510883	Inducible isoforms of cyclooxygenase and nitric-oxide synthase in inflammation.	Pubmed	0.0005557	1	0.0322	0.3873	2	2	PTGS1,PTGS2
Pubmed	12397634	Apolipoprotein E and apolipoprotein B genotypes and risk for spina bifida.	Pubmed	0.0005557	1	0.0322	0.3873	2	2	APOB,APOE
Pubmed	15882059	A biophysical investigation of recombinant hemoglobins with aromatic B10 mutations in the distal heme pockets.	Pubmed	0.0005557	1	0.0322	0.3873	2	2	HBA1,HBB
Pubmed	12098066	T cell infiltration and chemokine expression: relevance to the disease localization in murine graft-versus-host disease.	Pubmed	0.0005557	1	0.0322	0.3873	2	2	CXCL9,CCL2
Pubmed	24388797	A combined effect of two Alzheimer's risk genes on medial temporal activity during executive attention in young adults.	Pubmed	0.0005557	1	0.0322	0.3873	2	2	APOE,CLU
Pubmed	21724072	Analysis of genetic polymorphisms in skeletal Class I crowding.	Pubmed	0.0005557	1	0.0322	0.3873	2	2	EDA2R,EDA
Pubmed	7528353	Contribution of transplantations to the understanding of the role of the PLP gene.	Pubmed	0.0005557	1	0.0322	0.3873	2	2	MBP,PLP1
Pubmed	12958201	Absence of heme oxygenase-1 exacerbates atherosclerotic lesion formation and vascular remodeling.	Pubmed	0.0005557	1	0.0322	0.3873	2	2	APOE,HMOX1
Pubmed	19924507	GAB2 is not associated with late-onset Alzheimer's disease in Chinese Han.	Pubmed	0.0005557	1	0.0322	0.3873	2	2	APOE,GAB2
Pubmed	12210873	ACT and UCH-L1 polymorphisms in Parkinson's disease and age of onset.	Pubmed	0.0005557	1	0.0322	0.3873	2	2	ACTA1,UCHL1
Pubmed	19700767	The tyrosine sulfate-rich domains of the LRR proteins fibromodulin and osteoadherin bind motifs of basic clusters in a variety of heparin-binding proteins, including bioactive factors.	Pubmed	0.0005557	1	0.0322	0.3873	2	2	FMOD,OMD
Pubmed	21816131	CD55 deficiency protects against atherosclerosis in ApoE-deficient mice via C3a modulation of lipid metabolism.	Pubmed	0.0005557	1	0.0322	0.3873	2	2	APOE,C3
Pubmed	24551049	Association between COX-2 rs 6681231 genotype and interleukin-6 in periodontal connective tissue. A pilot study.	Pubmed	0.0005557	1	0.0322	0.3873	2	2	IL6,PTGS2
Pubmed	15100312	Differential regulation of neutrophil-activating chemokines by IL-6 and its soluble receptor isoforms.	Pubmed	0.0005557	1	0.0322	0.3873	2	2	IL6,IL6R
Pubmed	2101836	Hb Davenport or alpha 2(78)(EF7)Asn----His beta 2.	Pubmed	0.0005557	1	0.0322	0.3873	2	2	HBA1,HBA2
Pubmed	14519662	PDE4D plays a critical role in the control of airway smooth muscle contraction.	Pubmed	0.0005557	1	0.0322	0.3873	2	2	PDE4B,PDE4D
Pubmed	8294199	Hb Melusine [alpha 114(GH2)Pro-->Ser]: a new neutral hemoglobin variant.	Pubmed	0.0005557	1	0.0322	0.3873	2	2	HBA1,HBA2
Pubmed	16699947	Proapoptotic activity of NAG-1 is cell type specific and not related to COX-2 expression.	Pubmed	0.0005557	1	0.0322	0.3873	2	2	GDF15,PTGS2
Pubmed	18276608	Interleukin-6 (IL-6) and receptor (IL6-R) gene haplotypes associate with amniotic fluid protein concentrations in preterm birth.	Pubmed	0.0005557	1	0.0322	0.3873	2	2	IL6,IL6R
Pubmed	20403400	Upregulation of ANP and NPR-C mRNA in the kidney and heart of eNOS knockout mice.	Pubmed	0.0005557	1	0.0322	0.3873	2	2	NPPA,NPR3
Pubmed	17064313	Down-regulation of heme oxygenase-2 is associated with the increased expression of heme oxygenase-1 in human cell lines.	Pubmed	0.0005557	1	0.0322	0.3873	2	2	HMOX1,HMOX2
Pubmed	8692825	Phenotypic analysis of mice expressing exclusively apolipoprotein B48 or apolipoprotein B100.	Pubmed	0.0005557	1	0.0322	0.3873	2	2	APOB,APOE
Pubmed	21908515	Genome-wide association study identifies breast cancer risk variant at 10q21.2: results from the Asia Breast Cancer Consortium.	Pubmed	0.0005557	1	0.0322	0.3873	2	2	ZNF365,LINC-PINT
Pubmed	28456715	Multiple lipopolysaccharide (LPS) injections alter interleukin 6 (IL-6), IL-7, IL-10 and IL-6 and IL-7 receptor mRNA in CNS and spleen.	Pubmed	0.0005557	1	0.0322	0.3873	2	2	IL6,IL6R
Pubmed	19487598	Heme oxygenase 1 determines atherosclerotic lesion progression into a vulnerable plaque.	Pubmed	0.0005557	1	0.0322	0.3873	2	2	APOE,HMOX1
Pubmed	24850720	The combined role of galactose-deficient IgA1 and streptococcal IgA-binding M Protein in inducing IL-6 and C3 secretion from human mesangial cells: implications for IgA nephropathy.	Pubmed	0.0005557	1	0.0322	0.3873	2	2	C3,IL6
Pubmed	9718313	Proteolysis of factor V by cathepsin G and elastase indicates that cleavage at Arg1545 optimizes cofactor function by facilitating factor Xa binding.	Pubmed	0.0005557	1	0.0322	0.3873	2	2	F5,CTSG
Pubmed	10668482	Cyclooxygenase-deficient mice. A summary of their characteristics and susceptibilities to inflammation and carcinogenesis.	Pubmed	0.0005557	1	0.0322	0.3873	2	2	PTGS1,PTGS2
Pubmed	24096654	Calcitonin gene-related peptide upregulates serum amyloid A synthesis through activation of interleukin-6.	Pubmed	0.0005557	1	0.0322	0.3873	2	2	SAA1,IL6
Pubmed	17681165	Abnormalities of prostaglandins and cyclooxygenase enzymes in female patients with slow-transit constipation.	Pubmed	0.0005557	1	0.0322	0.3873	2	2	PTGS1,PTGS2
Pubmed	25872266	[The low content of apolipoprotein E as a risk factor of increasing of ratio apolipoprotein B/A-1 in healthy males with normal lipemia].	Pubmed	0.0005557	1	0.0322	0.3873	2	2	APOB,APOE
Pubmed	19277979	Role of connective tissue growth factor and its interaction with basic fibroblast growth factor and macrophage chemoattractant protein-1 in skin fibrosis.	Pubmed	0.0005557	1	0.0322	0.3873	2	2	CCL2,CCN2
Pubmed	28300150	S-nitrosylation of UCHL1 induces its structural instability and promotes ?-synuclein aggregation.	Pubmed	0.0005557	1	0.0322	0.3873	2	2	SNCA,UCHL1
Pubmed	25738264	Testosterone enhances lipopolysaccharide-induced interleukin-6 and macrophage chemotactic protein-1 expression by activating the extracellular signal-regulated kinase 1/2/nuclear factor-?B signalling pathways in 3T3-L1 adipocytes.	Pubmed	0.0005557	1	0.0322	0.3873	2	2	CCL2,IL6
Pubmed	20042582	Essential roles of IL-6 trans-signaling in colonic epithelial cells, induced by the IL-6/soluble-IL-6 receptor derived from lamina propria macrophages, on the development of colitis-associated premalignant cancer in a murine model.	Pubmed	0.0005557	1	0.0322	0.3873	2	2	IL6,IL6R
Pubmed	20598923	Alpha-thalassemia is associated with a decreased occurrence and a delayed age-at-onset of albuminuria in sickle cell anemia patients.	Pubmed	0.0005557	1	0.0322	0.3873	2	2	HBA1,HBB
Pubmed	16550596	Increasing cyclooxygenase-2 (cox-2) gene expression in the progression of Barrett's esophagus to adenocarcinoma correlates with that of Bcl-2.	Pubmed	0.0005557	1	0.0322	0.3873	2	2	BCL2,PTGS2
Pubmed	25316791	Intestinal myofibroblast-specific Tpl2-Cox-2-PGE2 pathway links innate sensing to epithelial homeostasis.	Pubmed	0.0005557	1	0.0322	0.3873	2	2	MAP3K8,PTGS2
Pubmed	24081251	Clinical presentation and molecular identification of four uncommon alpha globin variants in Thailand. Initiation codon mutation of ?2-globin Gene (HBA2:c.1delA), donor splice site mutation of ?1-globin gene (IVSI-1, HBA1:c.95 + 1G>A), hemoglobin Queens Park/Chao Pra Ya (HBA1:c.98T>A) and hemoglobin Westmead (HBA2:c.369C>G).	Pubmed	0.0005557	1	0.0322	0.3873	2	2	HBA1,HBA2
Pubmed	22872134	Growth differentiation factor-15 upregulates interleukin-6 to promote tumorigenesis of prostate carcinoma PC-3 cells.	Pubmed	0.0005557	1	0.0322	0.3873	2	2	GDF15,IL6
Pubmed	10421843	Cytokine-inducible SH2 protein-3 (CIS3/SOCS3) inhibits Janus tyrosine kinase by binding through the N-terminal kinase inhibitory region as well as SH2 domain.	Pubmed	0.0005557	1	0.0322	0.3873	2	2	SOCS3,JAK2
Pubmed	18068164	Regulation of natural-killer cell cytotoxicity and enhancement of complement factors in the spontaneously aborted mouse placenta.	Pubmed	0.0005557	1	0.0322	0.3873	2	2	C3,CFD
Pubmed	21797699	The carrier frequency of ?-globin gene triplication in an Iranian population with normal or borderline hematological parameters.	Pubmed	0.0005557	1	0.0322	0.3873	2	2	HBA1,HBA2
Pubmed	20413671	Effect of apolipoprotein E genotype on apolipoprotein B-100 metabolism in normolipidemic and hyperlipidemic subjects.	Pubmed	0.0005557	1	0.0322	0.3873	2	2	APOB,APOE
Pubmed	12054171	Cyclo-oxygenase 2 function is essential for bone fracture healing.	Pubmed	0.0005557	1	0.0322	0.3873	2	2	PTGS1,PTGS2
Pubmed	22467660	Cutting edge: Inhibition of IL-6 trans-signaling protects from malaria-induced lethality in mice.	Pubmed	0.0005557	1	0.0322	0.3873	2	2	IL6,IL6R
Pubmed	19711010	Modulation of inflammatory response by selective inhibition of cyclooxygenase-1 and cyclooxygenase-2 in acute kidney injury.	Pubmed	0.0005557	1	0.0322	0.3873	2	2	PTGS1,PTGS2
Pubmed	10727451	Prostaglandin G/H synthase-2 is required for maximal formation of osteoclast-like cells in culture.	Pubmed	0.0005557	1	0.0322	0.3873	2	2	PTGS1,PTGS2
Pubmed	22038216	Expression of COX-2 and Bcl-2 in primary fallopian tube carcinoma: correlations with clinicopathologic features.	Pubmed	0.0005557	1	0.0322	0.3873	2	2	BCL2,PTGS2
Pubmed	1396170	Oligodendrocytes from jimpy and normal mature tissue can be 'activated' when transplanted in a newborn environment.	Pubmed	0.0005557	1	0.0322	0.3873	2	2	MBP,PLP1
Pubmed	12118094	Both constitutive and inducible prostaglandin H synthase affect dermal wound healing in mice.	Pubmed	0.0005557	1	0.0322	0.3873	2	2	PTGS1,PTGS2
Pubmed	23052480	Platinum-resistance in ovarian cancer cells is mediated by IL-6 secretion via the increased expression of its target cIAP-2.	Pubmed	0.0005557	1	0.0322	0.3873	2	2	BIRC3,IL6
Pubmed	18617679	Regulation of COX-2 expression and IL-6 release by particulate matter in airway epithelial cells.	Pubmed	0.0005557	1	0.0322	0.3873	2	2	IL6,PTGS2
Pubmed	8882280	Immunohistochemical and ultrastructural localization of prostaglandin H synthase in the preimplantation mouse embryo.	Pubmed	0.0005557	1	0.0322	0.3873	2	2	PTGS1,PTGS2
Pubmed	16199887	SOCS2 can enhance interleukin-2 (IL-2) and IL-3 signaling by accelerating SOCS3 degradation.	Pubmed	0.0005557	1	0.0322	0.3873	2	2	SOCS2,SOCS3
Pubmed	17393220	Postprandial lipemia is modified by the presence of the APOB-516C/T polymorphism in a healthy Caucasian population.	Pubmed	0.0005557	1	0.0322	0.3873	2	2	APOB,APOE
Pubmed	23078005	Comparative analysis of IL6 and IL6 receptor gene polymorphisms in mastocytosis.	Pubmed	0.0005557	1	0.0322	0.3873	2	2	IL6,IL6R
Pubmed	21266582	Nitroarachidonic acid, a novel peroxidase inhibitor of prostaglandin endoperoxide H synthases 1 and 2.	Pubmed	0.0005557	1	0.0322	0.3873	2	2	PTGS1,PTGS2
Pubmed	21031019	LOC387715/HTRA1 gene polymorphisms and susceptibility to age-related macular degeneration: A HuGE review and meta-analysis.	Pubmed	0.0005557	1	0.0322	0.3873	2	2	ARMS2,HTRA1
Pubmed	9013559	Prostaglandin synthase-1 and prostaglandin synthase-2 are coupled to distinct phospholipases for the generation of prostaglandin D2 in activated mast cells.	Pubmed	0.0005557	1	0.0322	0.3873	2	2	PTGS1,PTGS2
Pubmed	12054662	Esterification of the propionate groups promotes alpha/beta hemoglobin chain homogeneity of CN-hemin binding.	Pubmed	0.0005557	1	0.0322	0.3873	2	2	HBA1,HBB
Pubmed	19523994	Stage- and region-specific cyclooxygenase expression and effects of a selective COX-1 inhibitor in the mouse amygdala kindling model.	Pubmed	0.0005557	1	0.0322	0.3873	2	2	PTGS1,PTGS2
Pubmed	11173922	Rumpshaker behaves like juvenile-lethal Plp mutations when combined with shiverer in double mutant mice.	Pubmed	0.0005557	1	0.0322	0.3873	2	2	MBP,PLP1
Pubmed	9256365	Expression of the two isoforms of prostaglandin endoperoxide synthase (PGHS-1 and PGHS-2) during adipose cell differentiation.	Pubmed	0.0005557	1	0.0322	0.3873	2	2	PTGS1,PTGS2
Pubmed	8181472	Characterization of the human gene (PTGS2) encoding prostaglandin-endoperoxide synthase 2.	Pubmed	0.0005557	1	0.0322	0.3873	2	2	PTGS1,PTGS2
Pubmed	2230077	An X-linked recessive mutation producing cleft palate, crooked tail, and polydactyly in mice.	Pubmed	0.0005557	1	0.0322	0.3873	2	2	PLP1,EDA
Pubmed	18971377	Interleukin-6 and neural stem cells: more than gliogenesis.	Pubmed	0.0005557	1	0.0322	0.3873	2	2	IL6,IL6R
Pubmed	17607302	Midkine is involved in tubulointerstitial inflammation associated with diabetic nephropathy.	Pubmed	0.0005557	1	0.0322	0.3873	2	2	MDK,CCL2
Pubmed	17192406	Proline-, glutamic acid-, and leucine-rich protein-1/modulator of nongenomic activity of estrogen receptor enhances androgen receptor functions through LIM-only coactivator, four-and-a-half LIM-only protein 2.	Pubmed	0.0005557	1	0.0322	0.3873	2	2	FHL2,PELP1
Pubmed	10510402	Novel path to activation of vascular smooth muscle cells: up-regulation of gp130 creates an autocrine activation loop by IL-6 and its soluble receptor.	Pubmed	0.0005557	1	0.0322	0.3873	2	2	IL6,IL6R
Pubmed	28168301	TLR4-induced NF-?B and MAPK signaling regulate the IL-6 mRNA stabilizing protein Arid5a.	Pubmed	0.0005557	1	0.0322	0.3873	2	2	ARID5A,IL6
Pubmed	26011242	Effects of the jimpy mutation on mouse retinal structure and function.	Pubmed	0.0005557	1	0.0322	0.3873	2	2	PLP1,EDA
Pubmed	21713707	[Expression and clinical significance of COX-2 and BCL-2 in distal transitional mucosa adjacent to rectal carcinoma].	Pubmed	0.0005557	1	0.0322	0.3873	2	2	BCL2,PTGS2
Pubmed	15102883	Abnormal in vivo metabolism of apoB-containing lipoproteins in human apoE deficiency.	Pubmed	0.0005557	1	0.0322	0.3873	2	2	APOB,APOE
Pubmed	18674596	Heme oxygenase 2 deficiency increases brain swelling and inflammation after intracerebral hemorrhage.	Pubmed	0.0005557	1	0.0322	0.3873	2	2	HMOX1,HMOX2
Pubmed	30736789	Extracts from Sageretia thea reduce cell viability through inducing cyclin D1 proteasomal degradation and HO-1 expression in human colorectal cancer cells.	Pubmed	0.0005557	1	0.0322	0.3873	2	2	CCND1,HMOX1
Pubmed	9763477	Multiple restricted origin of oligodendrocytes.	Pubmed	0.0005557	1	0.0322	0.3873	2	2	PDGFRA,PLP1
Pubmed	22987923	Salt-sensitive hypertension and cardiac hypertrophy in transgenic mice expressing a corin variant identified in blacks.	Pubmed	0.0005557	1	0.0322	0.3873	2	2	CORIN,NPPA
Pubmed	26200663	Obesity Is a Positive Modulator of IL-6R and IL-6 Expression in the Subcutaneous Adipose Tissue: Significance for Metabolic Inflammation.	Pubmed	0.0005557	1	0.0322	0.3873	2	2	IL6,IL6R
Pubmed	19897004	Interleukin 6-174 G/C promoter and variable number of tandem repeats (VNTR) gene polymorphisms in sporadic Alzheimer's disease.	Pubmed	0.0005557	1	0.0322	0.3873	2	2	APOE,IL6
Pubmed	27143425	Risk-reducing Apolipoprotein E and Clusterin genotypes protect against the consequences of poor vascular health on executive function performance and change in nondemented older adults.	Pubmed	0.0005557	1	0.0322	0.3873	2	2	APOE,CLU
Pubmed	12045254	Cyclooxygenase-2 regulates mesenchymal cell differentiation into the osteoblast lineage and is critically involved in bone repair.	Pubmed	0.0005557	1	0.0322	0.3873	2	2	PTGS1,PTGS2
Pubmed	11034314	IL-10 attenuates IFN-alpha-activated STAT1 in the liver: involvement of SOCS2 and SOCS3.	Pubmed	0.0005557	1	0.0322	0.3873	2	2	SOCS2,SOCS3
Pubmed	12067981	Deficiency of either cyclooxygenase (COX)-1 or COX-2 alters epidermal differentiation and reduces mouse skin tumorigenesis.	Pubmed	0.0005557	1	0.0322	0.3873	2	2	PTGS1,PTGS2
Pubmed	11212255	Bcl-2 delays and alters hepatic carcinogenesis induced by transforming growth factor alpha.	Pubmed	0.0005557	1	0.0322	0.3873	2	2	BCL2,TGFA
Pubmed	25477257	ADAMTS-4 and ADAMTS-5 expression in human temporomandibular joint discs with internal derangement, correlates with degeneration.	Pubmed	0.0005557	1	0.0322	0.3873	2	2	ADAMTS5,ADAMTS4
Pubmed	19404549	Variants in the coagulation factor 2 receptor (F2R) gene influence the risk of myocardial infarction in men through an interaction with interleukin 6 serum levels.	Pubmed	0.0005557	1	0.0322	0.3873	2	2	F2R,IL6
Pubmed	18499648	Genotype, phenotype, and karyotype correlation in the XO mouse model of Turner Syndrome.	Pubmed	0.0005557	1	0.0322	0.3873	2	2	ASIP,EDA
Pubmed	28974563	Fibromodulin and regulation of the intricate balance between myoblast differentiation to myocytes or adipocyte-like cells.	Pubmed	0.0005557	1	0.0322	0.3873	2	2	FMOD,CLU
Pubmed	17317861	The myeloproliferative disorder-associated JAK2 V617F mutant escapes negative regulation by suppressor of cytokine signaling 3.	Pubmed	0.0005557	1	0.0322	0.3873	2	2	SOCS3,JAK2
Pubmed	29117940	ETV4 Facilitates Cell-Cycle Progression in Pancreatic Cells through Transcriptional Regulation of Cyclin D1.	Pubmed	0.0005557	1	0.0322	0.3873	2	2	ETV4,CCND1
Pubmed	15236771	Interleukin 6-174 G/C promoter gene polymorphism in centenarians: no evidence of association with human longevity or interaction with apolipoprotein E alleles.	Pubmed	0.0005557	1	0.0322	0.3873	2	2	APOE,IL6
Pubmed	12966208	Soma-restricted products of the myelin proteolipid gene are expressed primarily in neurons in the developing mouse nervous system.	Pubmed	0.0005557	1	0.0322	0.3873	2	2	MBP,PLP1
Pubmed	28779573	Role of Interleukin-6 and Its Receptor in Endometriosis.	Pubmed	0.0005557	1	0.0322	0.3873	2	2	IL6,IL6R
Pubmed	28528772	Early interleukin-6 enhances hepatic ketogenesis in APPSWE/PSEN1dE9 mice via 3-hydroxy-3-methylglutary-CoA synthase 2 signaling activation by p38/nuclear factor ?B p65.	Pubmed	0.0005557	1	0.0322	0.3873	2	2	HMGCS2,IL6
Pubmed	18022660	Risk of carotid atherosclerosis associated with genetic polymorphisms of apolipoprotein E and inflammatory genes among arsenic exposed residents in Taiwan.	Pubmed	0.0005557	1	0.0322	0.3873	2	2	CCL2,APOE
Pubmed	29760184	Structural and Functional Rescue of Chronic Metabolically Stressed Optic Nerves through Respiration.	Pubmed	0.0005557	1	0.0322	0.3873	2	2	GPNMB,TYRP1
Pubmed	16901907	Neuroglycan C is a novel midkine receptor involved in process elongation of oligodendroglial precursor-like cells.	Pubmed	0.0005557	1	0.0322	0.3873	2	2	MDK,CSPG5
Pubmed	22342841	Suppression of cytokine signaling by SOCS3: characterization of the mode of inhibition and the basis of its specificity.	Pubmed	0.0005557	1	0.0322	0.3873	2	2	SOCS3,JAK2
Pubmed	28400538	The transcription factor MAFK induces EMT and malignant progression of triple-negative breast cancer cells through its target GPNMB.	Pubmed	0.0005557	1	0.0322	0.3873	2	2	GPNMB,MAFK
Pubmed	27068103	Treatment with anti-IL-6 receptor antibody prevented increase in serum hepcidin levels and improved anemia in mice inoculated with IL-6-producing lung carcinoma cells.	Pubmed	0.0005557	1	0.0322	0.3873	2	2	IL6,IL6R
Pubmed	15963783	Serine protease cathepsin G regulates adhesion-dependent neutrophil effector functions by modulating integrin clustering.	Pubmed	0.0005557	1	0.0322	0.3873	2	2	CTSG,ELANE
Pubmed	17346257	Ethnic differences in interleukin 6 (IL-6) and IL6 receptor genes in spontaneous preterm birth and effects on amniotic fluid protein levels.	Pubmed	0.0005557	1	0.0322	0.3873	2	2	IL6,IL6R
Pubmed	22982857	Glutathione promotes prostaglandin H synthase (cyclooxygenase)-dependent formation of malondialdehyde and 15(S)-8-iso-prostaglandin F2?.	Pubmed	0.0005557	1	0.0322	0.3873	2	2	PTGS1,PTGS2
Pubmed	27401285	Panax quinquefolium saponin combined with dual antiplatelet drugs inhibits platelet adhesion to injured HUVECs via PI3K/AKT and COX pathways.	Pubmed	0.0005557	1	0.0322	0.3873	2	2	PTGS1,PTGS2
Pubmed	25770145	Increased atherosclerosis in P2Y13/apolipoprotein E double-knockout mice: contribution of P2Y13 to reverse cholesterol transport.	Pubmed	0.0005557	1	0.0322	0.3873	2	2	APOE,P2RY13
Pubmed	19280716	The IL6-174G/C polymorphism is associated with celiac disease susceptibility in girls.	Pubmed	0.0005557	1	0.0322	0.3873	2	2	IL6,IL6R
Pubmed	19620402	Neutrophil elastase is severely down-regulated in severe congenital neutropenia independent of ELA2 or HAX1 mutations but dependent on LEF-1.	Pubmed	0.0005557	1	0.0322	0.3873	2	2	ELANE,LEF1
Pubmed	21438011	Expression of the voltage- and Ca2+-dependent BK potassium channel subunits BK?1 and BK?4 in rodent astrocytes.	Pubmed	0.0005557	1	0.0322	0.3873	2	2	KCNMB4,KCNMB1
Pubmed	24806827	Deficiency of the NR4A orphan nuclear receptor NOR1 in hematopoietic stem cells accelerates atherosclerosis.	Pubmed	0.0005557	1	0.0322	0.3873	2	2	APOE,NR4A3
Pubmed	9202070	Susceptibility to atherosclerosis in mice expressing exclusively apolipoprotein B48 or apolipoprotein B100.	Pubmed	0.0005557	1	0.0322	0.3873	2	2	APOB,APOE
Pubmed	14749376	Myodegeneration in EDA-A2 transgenic mice is prevented by XEDAR deficiency.	Pubmed	0.0005557	1	0.0322	0.3873	2	2	EDA2R,EDA
Pubmed	8744932	Cloning of cDNA with possible transcription factor activity at the G1-S phase transition in human fibroblast cell lines.	Pubmed	0.0005557	1	0.0322	0.3873	2	2	PFDN1,PFDN4
Pubmed	20974296	The CC homozygosis of the -174G>C IL-6 polymorphism predicts a lower efficacy of rituximab therapy in rheumatoid arthritis.	Pubmed	0.0005557	1	0.0322	0.3873	2	2	IL6,IL6R
Pubmed	1861080	Proteolysis of C3 on U937 cell plasma membranes. Purification of cathepsin G.	Pubmed	0.0005557	1	0.0322	0.3873	2	2	C3,CTSG
Pubmed	17088426	PGE(1) stimulation of HEK293 cells generates multiple contiguous domains with different [cAMP]: role of compartmentalized phosphodiesterases.	Pubmed	0.0005557	1	0.0322	0.3873	2	2	PDE4B,PDE4D
Pubmed	11052981	Disruption of cyclooxygenase-1 gene results in an impaired response to radiation injury.	Pubmed	0.0005557	1	0.0322	0.3873	2	2	PTGS1,PTGS2
Pubmed	28466852	Temporal and tissue-specific requirements for T-lymphocyte IL-6 signalling in obesity-associated inflammation and insulin resistance.	Pubmed	0.0005557	1	0.0322	0.3873	2	2	IL6,IL6R
Pubmed	2681419	Elastase and cathepsin G of human monocytes. Quantification of cellular content, release in response to stimuli, and heterogeneity in elastase-mediated proteolytic activity.	Pubmed	0.0005557	1	0.0322	0.3873	2	2	CTSG,ELANE
Pubmed	1511986	Two new human hemoglobin variants caused by unusual mutational events: Hb Zaïre contains a five residue repetition within the alpha-chain and Hb Duino has two residues substituted in the beta-chain.	Pubmed	0.0005557	1	0.0322	0.3873	2	2	HBA1,HBB
Pubmed	18633189	Arterial stiffness, physical activity, and atrial natriuretic Peptide gene polymorphism in older subjects.	Pubmed	0.0005557	1	0.0322	0.3873	2	2	NPPA,NPR3
Pubmed	27386631	Effects of Cyclooxygenase on the Urothelium of the Urinary Bladder of Mice Exposed to Pelvic Radiation.	Pubmed	0.0005557	1	0.0322	0.3873	2	2	PTGS1,PTGS2
Pubmed	20501644	Crosstalk of EDA-A2/XEDAR in the p53 signaling pathway.	Pubmed	0.0005557	1	0.0322	0.3873	2	2	EDA2R,EDA
Pubmed	20682466	A new alpha(0)-thalassemia deletion found in a Dutch family (--(AW)).	Pubmed	0.0005557	1	0.0322	0.3873	2	2	HBA1,HBA2
Pubmed	11770048	Cyclooxygenase-2-mediated regulation of Kupffer cell interleukin-6 production following trauma-hemorrhage and subsequent sepsis.	Pubmed	0.0005557	1	0.0322	0.3873	2	2	IL6,PTGS2
Pubmed	15063763	LEPREL1, a novel ER and Golgi resident member of the Leprecan family.	Pubmed	0.0005557	1	0.0322	0.3873	2	2	P3H3,P3H2
Pubmed	15140022	Human leukocyte elastase and cathepsin G are specific inhibitors of C5a-dependent neutrophil enzyme release and chemotaxis.	Pubmed	0.0005557	1	0.0322	0.3873	2	2	CTSG,ELANE
Pubmed	26444418	Role of cyclooxygenase-1 and -2 in endothelium-dependent contraction of atherosclerotic mouse abdominal aortas.	Pubmed	0.0005557	1	0.0322	0.3873	2	2	PTGS1,PTGS2
Pubmed	17347481	Retrospective analysis of coagulation factor II receptor (F2R) sequence variation and coronary heart disease in hypertensive patients.	Pubmed	0.0005557	1	0.0322	0.3873	2	2	F2R,F2RL2
Pubmed	17192487	Transforming growth factor-beta2 and connective tissue growth factor in proliferative vitreoretinal diseases: possible involvement of hyalocytes and therapeutic potential of Rho kinase inhibitor.	Pubmed	0.0005557	1	0.0322	0.3873	2	2	TGFB2,CCN2
Pubmed	28235598	Overexpression of phosphodiesterase-4 subtypes involved in surgery-induced neuroinflammation and cognitive dysfunction in mice.	Pubmed	0.0005557	1	0.0322	0.3873	2	2	PDE4B,PDE4D
Pubmed	20348244	Dimethylarginine dimethylaminohydrolase overexpression ameliorates atherosclerosis in apolipoprotein E-deficient mice by lowering asymmetric dimethylarginine.	Pubmed	0.0005557	1	0.0322	0.3873	2	2	APOE,DDAH1
Pubmed	13872627	[The structure of normal adult human hemoglobins].	Pubmed	0.0005557	1	0.0322	0.3873	2	2	HBA1,HBB
Pubmed	19808895	Attenuated purinergic receptor function in patients with type 2 diabetes.	Pubmed	0.0005557	1	0.0322	0.3873	2	2	P2RX1,P2RY2
Pubmed	17018529	Regulation of the platelet-derived growth factor receptor-beta by G protein-coupled receptor kinase-5 in vascular smooth muscle cells involves the phosphatase Shp2.	Pubmed	0.0005557	1	0.0322	0.3873	2	2	APOE,GRK5
Pubmed	16898315	Screening of concurrent alpha-thalassaemia 1 in beta-thalassaemia carriers.	Pubmed	0.0005557	1	0.0322	0.3873	2	2	HBA1,HBB
Pubmed	26911931	STAMPing at the crossroads of normal physiology and disease states.	Pubmed	0.0005557	1	0.0322	0.3873	2	2	STEAP2,STEAP3
Pubmed	19797054	Deletion of a genomic segment containing the cardiac troponin I gene knocks down expression of the slow troponin T gene and impairs fatigue tolerance of diaphragm muscle.	Pubmed	0.0005557	1	0.0322	0.3873	2	2	TNNI3,TNNT1
Pubmed	26612259	Development of human neutralizing antibody to ADAMTS4 (aggrecanase-1) and ADAMTS5 (aggrecanase-2).	Pubmed	0.0005557	1	0.0322	0.3873	2	2	ADAMTS5,ADAMTS4
Pubmed	10207174	Hypoxia induces severe right ventricular dilatation and infarction in heme oxygenase-1 null mice.	Pubmed	0.0005557	1	0.0322	0.3873	2	2	HMOX1,HMOX2
Pubmed	15611275	Role of complement and complement membrane attack complex in laser-induced choroidal neovascularization.	Pubmed	0.0005557	1	0.0322	0.3873	2	2	C3,C6
Pubmed	11801682	Expression and regulation of aggrecanase in arthritis: the role of TGF-beta.	Pubmed	0.0005557	1	0.0322	0.3873	2	2	ADAMTS5,ADAMTS4
Pubmed	11705824	Cyclooxygenase-1 and -2 knockout mice demonstrate increased cardiac ischemia/reperfusion injury but are protected by acute preconditioning.	Pubmed	0.0005557	1	0.0322	0.3873	2	2	PTGS1,PTGS2
Pubmed	17192461	Involvement of apolipoprotein E in excess fat accumulation and insulin resistance.	Pubmed	0.0005557	1	0.0322	0.3873	2	2	APOE,ASIP
Pubmed	7518430	Functional alterations in adult and fetal hemoglobin Sassari Asp-alpha 126(H9)-->His. The role of alpha 1 alpha 2 contact.	Pubmed	0.0005557	1	0.0322	0.3873	2	2	HBA1,HBA2
Pubmed	7373648	The structure of human carbonmonoxy haemoglobin at 2.7 A resolution.	Pubmed	0.0005557	1	0.0322	0.3873	2	2	HBA1,HBB
Pubmed	10449516	Malignant transformation and antineoplastic actions of nonsteroidal antiinflammatory drugs (NSAIDs) on cyclooxygenase-null embryo fibroblasts.	Pubmed	0.0005557	1	0.0322	0.3873	2	2	PTGS1,PTGS2
Pubmed	27879347	Recombinant Haplotypes Narrow the ARMS2/HTRA1 Association Signal for Age-Related Macular Degeneration.	Pubmed	0.0005557	1	0.0322	0.3873	2	2	ARMS2,HTRA1
Pubmed	12499050	A polymorphism in the complement component C1r is not associated with sporadic Alzheimer's disease.	Pubmed	0.0005557	1	0.0322	0.3873	2	2	APOE,C1R
Pubmed	17295310	Functional role of transforming growth factor-beta type III receptor during palatal fusion.	Pubmed	0.0005557	1	0.0322	0.3873	2	2	TGFB3,TGFBR3
Pubmed	16530040	CRIg: a macrophage complement receptor required for phagocytosis of circulating pathogens.	Pubmed	0.0005557	1	0.0322	0.3873	2	2	C3,VSIG4
Pubmed	12754505	SOCS3 negatively regulates IL-6 signaling in vivo.	Pubmed	0.0005557	1	0.0322	0.3873	2	2	SOCS3,IL6
Pubmed	10773677	Assignment of human GADD45G to chromosome 9q22.1-->q22.3 by radiation hybrid mapping.	Pubmed	0.0005557	1	0.0322	0.3873	2	2	GADD45B,GADD45G
Pubmed	29386573	Circadian coordination of ATP release in the urothelium via connexin43 hemichannels.	Pubmed	0.0005557	1	0.0322	0.3873	2	2	ARNTL,PER2
Pubmed	28993616	Bone corticalization requires local SOCS3 activity and is promoted by androgen action via interleukin-6.	Pubmed	0.0005557	1	0.0322	0.3873	2	2	SOCS3,IL6
Pubmed	17885813	Cell cycle related modulations in Runx2 protein levels are independent of lymphocyte enhancer-binding factor 1 (Lef1) in proliferating osteoblasts.	Pubmed	0.0005557	1	0.0322	0.3873	2	2	RUNX2,LEF1
Pubmed	15602695	Embryonic stem cells differentiate into insulin-producing cells without selection of nestin-expressing cells.	Pubmed	0.0005557	1	0.0322	0.3873	2	2	NES,KRT19
Pubmed	20209122	Sequence variation in DDAH1 and DDAH2 genes is strongly and additively associated with serum ADMA concentrations in individuals with type 2 diabetes.	Pubmed	0.0005557	1	0.0322	0.3873	2	2	DDAH2,DDAH1
Pubmed	22353753	SORCS1 and APOE polymorphisms interact to confer risk for late-onset Alzheimer's disease in a Northern Han Chinese population.	Pubmed	0.0005557	1	0.0322	0.3873	2	2	SORCS1,APOE
Pubmed	16537651	The small GTPase R-Ras regulates organization of actin and drives membrane protrusions through the activity of PLCepsilon.	Pubmed	0.0005557	1	0.0322	0.3873	2	2	RRAS,PLCE1
Pubmed	11165015	Arrested testis development in the cpk mouse may be the result of abnormal steroid metabolism.	Pubmed	0.0005557	1	0.0322	0.3873	2	2	CYS1,HSD17B8
Pubmed	9616125	Axonal swellings and degeneration in mice lacking the major proteolipid of myelin.	Pubmed	0.0005557	1	0.0322	0.3873	2	2	MBP,PLP1
Pubmed	18849881	GRINL1A colocalizes with N-methyl D-aspartate receptor NR1 subunit and reduces N-methyl D-aspartate toxicity.	Pubmed	0.0005557	1	0.0322	0.3873	2	2	MYZAP,GCOM1
Pubmed	12720297	Variation in cyclooxygenase expression levels within the colorectum.	Pubmed	0.0005557	1	0.0322	0.3873	2	2	PTGS1,PTGS2
Pubmed	19008226	Homologous sequence in lumican and fibromodulin leucine-rich repeat 5-7 competes for collagen binding.	Pubmed	0.0005557	1	0.0322	0.3873	2	2	FMOD,LUM
Pubmed	9034153	Extramedullary expansion of hematopoietic progenitor cells in interleukin (IL)-6-sIL-6R double transgenic mice.	Pubmed	0.0005557	1	0.0322	0.3873	2	2	IL6,IL6R
Pubmed	19203086	Gender- and menstrual phase dependent regulation of inflammatory gene expression in response to aerobic exercise.	Pubmed	0.0005557	1	0.0322	0.3873	2	2	IL1RN,IL6
Pubmed	30944174	Dynamic and structural differences between heme oxygenase-1 and -2 are due to differences in their C-terminal regions.	Pubmed	0.0005557	1	0.0322	0.3873	2	2	HMOX1,HMOX2
Pubmed	12922938	Cyclooxygenase-1 and cyclooxygenase-2 in the mouse ductus arteriosus: individual activity and functional coupling with nitric oxide synthase.	Pubmed	0.0005557	1	0.0322	0.3873	2	2	PTGS1,PTGS2
Pubmed	26064906	Morphological and Biomechanical Differences in the Elastase and AngII apoE(-/-) Rodent Models of Abdominal Aortic Aneurysms.	Pubmed	0.0005557	1	0.0322	0.3873	2	2	APOE,ELANE
Pubmed	8566750	Keratinocyte growth factor is required for hair development but not for wound healing.	Pubmed	0.0005557	1	0.0322	0.3873	2	2	FGF7,TGFA
Pubmed	12204676	RhCG is downregulated in oesophageal squamous cell carcinomas, but expressed in multiple squamous epithelia.	Pubmed	0.0005557	1	0.0322	0.3873	2	2	RHCG,RHAG
Pubmed	23402770	Novel mutations responsible for ?-thalassemia in Iranian families.	Pubmed	0.0005557	1	0.0322	0.3873	2	2	HBA1,HBA2
Pubmed	22819337	A disintegrin and metalloproteinase with thrombospondin motifs 4 (ADAMTS-4) cleaves Reelin in an isoform-dependent manner.	Pubmed	0.0005557	1	0.0322	0.3873	2	2	ADAMTS4,RELN
Pubmed	26202245	Apolipoprotein E, but Not Apolipoprotein B, Is Essential for Efficient Cell-to-Cell Transmission of Hepatitis C Virus.	Pubmed	0.0005557	1	0.0322	0.3873	2	2	APOB,APOE
Pubmed	24838241	The association of hepatitis C virus glycoproteins with apolipoproteins E and B early in assembly is conserved in lipoviral particles.	Pubmed	0.0005557	1	0.0322	0.3873	2	2	APOB,APOE
Pubmed	12890753	Interphase and monoastral-mitotic phenotypes of overexpressed MAP4 are modulated by free tubulin concentrations.	Pubmed	0.0005557	1	0.0322	0.3873	2	2	MAP2,MAP4
Pubmed	15914123	Interleukin-1 plays a major role in vascular inflammation and atherosclerosis in male apolipoprotein E-knockout mice.	Pubmed	0.0005557	1	0.0322	0.3873	2	2	APOE,IL1RN
Pubmed	29695404	Establishment and Characteristics of a Novel Mantle Cell Lymphoma-derived Cell Line and a Bendamustine-resistant Subline.	Pubmed	0.0005557	1	0.0322	0.3873	2	2	MGST1,ABCB1
Pubmed	16688111	COX-2 protects against thrombosis of the retinal vasculature in a mouse model of proliferative retinopathy.	Pubmed	0.0005557	1	0.0322	0.3873	2	2	PTGS1,PTGS2
Pubmed	1312474	Expression of the murine interleukin 6 receptor in hepatoma cells: the intracytoplasmic domain is not required for interleukin 6 signal transduction.	Pubmed	0.0005557	1	0.0322	0.3873	2	2	IL6,IL6R
Pubmed	17868881	Expression of cyclooxygenase-1 and cyclooxygenase-2 in the normal human heart and in myocardial infarction.	Pubmed	0.0005557	1	0.0322	0.3873	2	2	PTGS1,PTGS2
Pubmed	28347241	Nestin and cluster of differentiation 146 expression in breast cancer: Predicting early recurrence by targeting metastasis?	Pubmed	0.0005557	1	0.0322	0.3873	2	2	MCAM,NES
Pubmed	16875891	The isozyme-specific effects of cyclooxygenase-deficiency on bone in mice.	Pubmed	0.0005557	1	0.0322	0.3873	2	2	PTGS1,PTGS2
Pubmed	25172542	Identification of key genes affecting disease free survival time of pediatric acute lymphoblastic leukemia based on bioinformatic analysis.	Pubmed	0.0005557	1	0.0322	0.3873	2	2	HK3,PTGS2
Pubmed	8349699	N-glycosylation of prostaglandin endoperoxide synthases-1 and -2 and their orientations in the endoplasmic reticulum.	Pubmed	0.0005557	1	0.0322	0.3873	2	2	PTGS1,PTGS2
Pubmed	19406470	Comparative analysis of IL6 promoter and receptor polymorphisms in myelodysplasia and multiple myeloma.	Pubmed	0.0005557	1	0.0322	0.3873	2	2	IL6,IL6R
Pubmed	6469697	Hb J Oxford [alpha 15 (A13) Gly----Asp] in Japan.	Pubmed	0.0005557	1	0.0322	0.3873	2	2	HBA1,HBA2
Pubmed	10491407	Allergic lung responses are increased in prostaglandin H synthase-deficient mice.	Pubmed	0.0005557	1	0.0322	0.3873	2	2	PTGS1,PTGS2
Pubmed	19047559	Is olfactory impairment in Parkinson disease related to phenotypic or genotypic characteristics?	Pubmed	0.0005557	1	0.0322	0.3873	2	2	APOE,SNCA
Pubmed	1712772	TIS10, a phorbol ester tumor promoter-inducible mRNA from Swiss 3T3 cells, encodes a novel prostaglandin synthase/cyclooxygenase homologue.	Pubmed	0.0005557	1	0.0322	0.3873	2	2	PTGS1,PTGS2
Pubmed	15800625	ADAMTS5 is the major aggrecanase in mouse cartilage in vivo and in vitro.	Pubmed	0.0005557	1	0.0322	0.3873	2	2	ADAMTS5,ADAMTS4
Pubmed	15207528	Apolipoprotein B gene polymorphism and plasma lipid levels in phenylketonuric children.	Pubmed	0.0005557	1	0.0322	0.3873	2	2	APOB,APOE
Pubmed	22428064	Local gene silencing of monocyte chemoattractant protein-1 prevents vulnerable plaque disruption in apolipoprotein E-knockout mice.	Pubmed	0.0005557	1	0.0322	0.3873	2	2	CCL2,APOE
Pubmed	17890485	Expression and secretion of the atrial natriuretic peptide in human adipose tissue and preadipocytes.	Pubmed	0.0005557	1	0.0322	0.3873	2	2	CORIN,NPPA
Pubmed	19494437	MCP-1 A-2518G polymorphism: effect on susceptibility for frontotemporal lobar degeneration and on cerebrospinal fluid MCP-1 levels.	Pubmed	0.0005557	1	0.0322	0.3873	2	2	CCL2,APOE
Pubmed	12189249	Cyclooxygenase-1-selective inhibition prolongs gestation in mice without adverse effects on the ductus arteriosus.	Pubmed	0.0005557	1	0.0322	0.3873	2	2	PTGS1,PTGS2
Pubmed	18548481	Effects of antisense RNA targeting of ODC and AdoMetDC on the synthesis of polyamine synthesis and cell growth in prostate cancer cells using a prostatic androgen-dependent promoter in adenovirus.	Pubmed	0.0005557	1	0.0322	0.3873	2	2	AMD1,ODC1
Pubmed	22972377	Platelet response to aspirin in Chinese stroke patients is independent of genetic polymorphisms of COX-1 C50T and COX-2 G765C.	Pubmed	0.0005557	1	0.0322	0.3873	2	2	PTGS1,PTGS2
Pubmed	26598760	Tim-3 enhances Fc?RI-proximal signaling to modulate mast cell activation.	Pubmed	0.0005557	1	0.0322	0.3873	2	2	FCER1A,HAVCR2
Pubmed	17071117	The role of the cylooxygenase pathway in nociception and pain.	Pubmed	0.0005557	1	0.0322	0.3873	2	2	PTGS1,PTGS2
Pubmed	24496564	Phase II study of low-dose fixed-rate infusion of gemcitabine combined with cisplatin and dexamethasone in resistant non-Hodgkin lymphoma and correlation with Bcl-2 and MDR expression.	Pubmed	0.0005557	1	0.0322	0.3873	2	2	BCL2,ABCB1
Pubmed	29858490	MicroRNA-365 Inhibits Cell Growth and Promotes Apoptosis in Melanoma by Targeting BCL2 and Cyclin D1 (CCND1).	Pubmed	0.0005557	1	0.0322	0.3873	2	2	CCND1,BCL2
Pubmed	23322566	Morphology of astrocytes in a glaucomatous optic nerve.	Pubmed	0.0005557	1	0.0322	0.3873	2	2	GPNMB,TYRP1
Pubmed	23956345	Elevated fetal adipsin/acylation-stimulating protein (ASP) in obese pregnancy: novel placental secretion via Hofbauer cells.	Pubmed	0.0005557	1	0.0322	0.3873	2	2	C3,CFD
Pubmed	16006154	Accelerated osteoarthritis in the temporomandibular joint of biglycan/fibromodulin double-deficient mice.	Pubmed	0.0005557	1	0.0322	0.3873	2	2	FMOD,BGN
Pubmed	12093889	Opposite effects of cyclooxygenase-1 and -2 activity on the pressor response to angiotensin II.	Pubmed	0.0005557	1	0.0322	0.3873	2	2	PTGS1,PTGS2
Pubmed	18398743	Protein expression profiling of cytokines and cytokine receptors on purified chronic lymphocytic leukemia cells from patients with favourable prognostic indicators.	Pubmed	0.0005557	1	0.0322	0.3873	2	2	CCL11,IL6
Pubmed	4212045	Haemoglobin inkster (alpha2 85aspartic acid leads to valine beta2) coexisting with beta-thalassaemia in a Caucasian family.	Pubmed	0.0005557	1	0.0322	0.3873	2	2	HBA1,HBA2
Pubmed	14988266	Molecular mechanisms of high glucose-induced cyclooxygenase-2 expression in monocytes.	Pubmed	0.0005557	1	0.0322	0.3873	2	2	PTGS1,PTGS2
Pubmed	16505033	Quantitative correlation of optic nerve pathology with ocular pressure and corneal thickness in the DBA/2 mouse model of glaucoma.	Pubmed	0.0005557	1	0.0322	0.3873	2	2	GPNMB,TYRP1
Pubmed	19416639	Suppression of adipogenesis program in cultured preadipocytes transfected stably with cyclooxygenase isoforms.	Pubmed	0.0005557	1	0.0322	0.3873	2	2	PTGS1,PTGS2
Pubmed	22209213	Hydrogen decreases athero-susceptibility in apolipoprotein B-containing lipoproteins and aorta of apolipoprotein E knockout mice.	Pubmed	0.0005557	1	0.0322	0.3873	2	2	APOB,APOE
Pubmed	17588340	Small interfering RNA of cyclooxygenase-2 induces growth inhibition and apoptosis independently of Bcl-2 in human myeloma RPMI8226 cells.	Pubmed	0.0005557	1	0.0322	0.3873	2	2	BCL2,PTGS2
Pubmed	18997734	Classification using hierarchical clustering of tumor-infiltrating immune cells identifies poor prognostic ovarian cancers with high levels of COX expression.	Pubmed	0.0005557	1	0.0322	0.3873	2	2	PTGS1,PTGS2
Pubmed	22461690	Cathepsin G and neutrophil elastase contribute to lung-protective immunity against mycobacterial infections in mice.	Pubmed	0.0005557	1	0.0322	0.3873	2	2	CTSG,ELANE
Pubmed	24446231	Apolipoproteins E and J interfere with amyloid-beta uptake by primary human astrocytes and microglia in vitro.	Pubmed	0.0005557	1	0.0322	0.3873	2	2	APOE,CLU
Pubmed	20072700	Distinct functions of Period2 and Period3 in the mouse circadian system revealed by in vitro analysis.	Pubmed	0.0005557	1	0.0322	0.3873	2	2	PER3,PER2
Pubmed	28442395	Association of genetic variations in IL-6/IL-6R pathway genes with gastric cancer risk in a Chinese population.	Pubmed	0.0005557	1	0.0322	0.3873	2	2	IL6,IL6R
Pubmed	19885646	Resident peritoneal macrophages and mast cells are important cellular sites of COX-1 and COX-2 activity during acute peritoneal inflammation.	Pubmed	0.0005557	1	0.0322	0.3873	2	2	PTGS1,PTGS2
Pubmed	21951843	PLC? cooperates with the NF-?B pathway to augment TNF?-stimulated CCL2/MCP1 expression in human keratinocyte.	Pubmed	0.0005557	1	0.0322	0.3873	2	2	CCL2,PLCE1
Pubmed	17621165	Investigation of potential gene-gene interactions between APOE and RELN contributing to autism risk.	Pubmed	0.0005557	1	0.0322	0.3873	2	2	APOE,RELN
Pubmed	19234509	Association of IL6 and CCL2 gene polymorphisms with the outcome of allogeneic haematopoietic stem cell transplantation.	Pubmed	0.0005557	1	0.0322	0.3873	2	2	CCL2,IL6
Pubmed	17828274	Identification of tendon stem/progenitor cells and the role of the extracellular matrix in their niche.	Pubmed	0.0005557	1	0.0322	0.3873	2	2	FMOD,BGN
Pubmed	11257478	Extraocular muscle is spared despite the absence of an intact sarcoglycan complex in gamma- or delta-sarcoglycan-deficient mice.	Pubmed	0.0005557	1	0.0322	0.3873	2	2	SGCD,SGCG
Pubmed	15897894	Molecular cloning and characterization of STAMP2, an androgen-regulated six transmembrane protein that is overexpressed in prostate cancer.	Pubmed	0.0005557	1	0.0322	0.3873	2	2	STEAP2,STEAP4
Pubmed	17416347	Effects of apoE genotype on macrophage inflammation and heme oxygenase-1 expression.	Pubmed	0.0005557	1	0.0322	0.3873	2	2	APOE,HMOX1
Pubmed	9520403	Stimulation of p70S6 kinase via a growth hormone-controlled phosphatidylinositol 3-kinase pathway leads to the activation of a PDE4A cyclic AMP-specific phosphodiesterase in 3T3-F442A preadipocytes.	Pubmed	0.0005557	1	0.0322	0.3873	2	2	PDE4A,PDE4D
Pubmed	15863457	Vasoactive prostanoids are generated from arachidonic acid by COX-1 and COX-2 in the mouse.	Pubmed	0.0005557	1	0.0322	0.3873	2	2	PTGS1,PTGS2
Pubmed	2109618	Immunohistochemical localization of prostaglandin H synthase in the embryo and uterus of the mouse from ovulation through implantation.	Pubmed	0.0005557	1	0.0322	0.3873	2	2	PTGS1,PTGS2
Pubmed	9659221	Regulation of interleukin-6 and interleukin-6R alpha (gp80) expression by murine immunoglobulin-secreting B-cell hybridomas.	Pubmed	0.0005557	1	0.0322	0.3873	2	2	IL6,IL6R
Pubmed	23568006	Enhanced chemosensitivity by simultaneously inhibiting cell cycle progression and promoting apoptosis of drug-resistant osteosarcoma MG63/DXR cells by targeting Cyclin D1 and Bcl-2.	Pubmed	0.0005557	1	0.0322	0.3873	2	2	CCND1,BCL2
Pubmed	11485313	Transcriptional activity of the promoter region of rat frizzled-related protein gene.	Pubmed	0.0005557	1	0.0322	0.3873	2	2	SFRP4,FRZB
Pubmed	17620617	GluR7 is an essential subunit of presynaptic kainate autoreceptors at hippocampal mossy fiber synapses.	Pubmed	0.0005557	1	0.0322	0.3873	2	2	GRIK2,GRIK3
Pubmed	19479992	Neurons express hemoglobin alpha- and beta-chains in rat and human brains.	Pubmed	0.0005557	1	0.0322	0.3873	2	2	HBA2,HBB
Pubmed	11499613	Characterization of glycated hemoglobin in diabetic patients: usefulness of electrospray mass spectrometry in monitoring the extent and distribution of glycation.	Pubmed	0.0005557	1	0.0322	0.3873	2	2	HBA1,HBB
Pubmed	478977	Hemoglobin Suan-Dok (alpha 2 109 (G16) Leu replaced by Arg beta 2): an unstable variant associated with alpha-thalassemia.	Pubmed	0.0005557	1	0.0322	0.3873	2	2	HBA1,HBA2
Pubmed	20671240	Genetic Ace2 deficiency accentuates vascular inflammation and atherosclerosis in the ApoE knockout mouse.	Pubmed	0.0005557	1	0.0322	0.3873	2	2	APOE,ACE2
Pubmed	15809370	Homozygosity for factor V Leiden leads to enhanced thrombosis and atherosclerosis in mice.	Pubmed	0.0005557	1	0.0322	0.3873	2	2	F5,APOE
Pubmed	27983983	Clusterin in the protein corona plays a key role in the stealth effect of nanoparticles against phagocytes.	Pubmed	0.0005557	1	0.0322	0.3873	2	2	CLU,ACE2
Pubmed	17916073	Cyclooxygenase-2 expression correlates with phaeochromocytoma malignancy: evidence for a Bcl-2-dependent mechanism.	Pubmed	0.0005557	1	0.0322	0.3873	2	2	BCL2,PTGS2
Pubmed	18819034	Cyclooxygenase-2, multidrug resistance 1, and breast cancer resistance protein gene polymorphisms and inflammatory bowel disease in the Danish population.	Pubmed	0.0005557	1	0.0322	0.3873	2	2	ABCB1,PTGS2
Pubmed	22773442	Smooth muscle cell-specific runx2 deficiency inhibits vascular calcification.	Pubmed	0.0005557	1	0.0322	0.3873	2	2	APOE,RUNX2
Pubmed	23742950	Cyclooxygenase and cytokine regulation in lung fibroblasts activated with viral versus bacterial pathogen associated molecular patterns.	Pubmed	0.0005557	1	0.0322	0.3873	2	2	PTGS1,PTGS2
Pubmed	12842195	Cyclooxygenase expression is elevated in retinoic acid-differentiated U937 cells.	Pubmed	0.0005557	1	0.0322	0.3873	2	2	PTGS1,PTGS2
Pubmed	15105414	Lipid retention in the arterial wall of two mouse strains with different atherosclerosis susceptibility.	Pubmed	0.0005557	1	0.0322	0.3873	2	2	APOB,APOE
Pubmed	19215610	Hypocholesterolemia in adult patients with thalassemia: a link with the severity of genotype in thalassemia intermedia patients.	Pubmed	0.0005557	1	0.0322	0.3873	2	2	HBA1,HBB
Pubmed	18511946	Age-related macular degeneration is associated with an unstable ARMS2 (LOC387715) mRNA.	Pubmed	0.0005557	1	0.0322	0.3873	2	2	ARMS2,HTRA1
Pubmed	10569723	Two new alpha chain variants: Hb Boghé [alpha58(E7)His-->Gln, alpha2], a variant on the distal histidine, and Hb CHarolles [alpha103(G10)His-Tyr, alpha1].	Pubmed	0.0005557	1	0.0322	0.3873	2	2	HBA1,HBA2
Pubmed	28287401	Prostaglandin-mediated inhibition of serotonin signaling controls the affective component of inflammatory pain.	Pubmed	0.0005557	1	0.0322	0.3873	2	2	PTGS1,PTGS2
Pubmed	27379525	HtrA1 Proteolysis of ApoE In Vitro Is Allele Selective.	Pubmed	0.0005557	1	0.0322	0.3873	2	2	APOE,HTRA1
Pubmed	28918391	Genetic polymorphisms associated with the risk of concussion in 1056 college athletes: a multicentre prospective cohort study.	Pubmed	0.0005557	1	0.0322	0.3873	2	2	APOE,IL6R
Pubmed	14636558	Neutrophil elastase cleaves PML-RARalpha and is important for the development of acute promyelocytic leukemia in mice.	Pubmed	0.0005557	1	0.0322	0.3873	2	2	CTSG,ELANE
Pubmed	25101296	ADAMTS4 and ADAMTS5 knockout mice are protected from versican but not aggrecan or brevican proteolysis during spinal cord injury.	Pubmed	0.0005557	1	0.0322	0.3873	2	2	ADAMTS5,ADAMTS4
Pubmed	20739468	Microarray analysis of iris gene expression in mice with mutations influencing pigmentation.	Pubmed	0.0005557	1	0.0322	0.3873	2	2	GPNMB,TYRP1
Pubmed	11939522	Hb Ube-2 in a Taiwanese subject: an A-->G substitution at codon 68 of the alpha2-globin gene.	Pubmed	0.0005557	1	0.0322	0.3873	2	2	HBA1,HBA2
Pubmed	15715677	Increased cyclin E expression may obviate the role of cyclin D1 during brain development in cyclin D1 knockout mice.	Pubmed	0.0005557	1	0.0322	0.3873	2	2	CCND1,GRIN2A
Pubmed	23454598	Identification of a 14 kDa endocan fragment generated by cathepsin G, a novel circulating biomarker in patients with sepsis.	Pubmed	0.0005557	1	0.0322	0.3873	2	2	ESM1,CTSG
Pubmed	16003758	Matrix-degrading proteases ADAMTS4 and ADAMTS5 (disintegrins and metalloproteinases with thrombospondin motifs 4 and 5) are expressed in human glioblastomas.	Pubmed	0.0005557	1	0.0322	0.3873	2	2	ADAMTS5,ADAMTS4
Pubmed	12958020	Anti-inflammatory effect of two isoforms of COX in H. pylori-induced gastritis in mice: possible involvement of PGE2.	Pubmed	0.0005557	1	0.0322	0.3873	2	2	PTGS1,PTGS2
Pubmed	2364893	Differences in levels of neuroglial cell death in jimpy male mice and carrier females.	Pubmed	0.0005557	1	0.0322	0.3873	2	2	PLP1,EDA
Pubmed	22493487	Novel role of ADAMTS-5 protein in proteoglycan turnover and lipoprotein retention in atherosclerosis.	Pubmed	0.0005557	1	0.0322	0.3873	2	2	APOE,ADAMTS5
Pubmed	22049084	High temperature requirement factor A1 (HTRA1) gene regulates angiogenesis through transforming growth factor-? family member growth differentiation factor 6.	Pubmed	0.0005557	1	0.0322	0.3873	2	2	GDF6,HTRA1
Pubmed	20691261	Role of IL-6 trans-signaling in CCl?induced liver damage.	Pubmed	0.0005557	1	0.0322	0.3873	2	2	IL6,IL6R
Pubmed	15059807	Lack of interleukin-1 receptor antagonist modulates plaque composition in apolipoprotein E-deficient mice.	Pubmed	0.0005557	1	0.0322	0.3873	2	2	APOE,IL1RN
Pubmed	23786015	[Pharmacogenetic criteria of drug-resistant epilepsy].	Pubmed	0.0005557	1	0.0322	0.3873	2	2	SCN1A,ABCB1
Pubmed	18838483	Critical role of COX-1 in prostacyclin production by human endothelial cells under modification of hydroperoxide tone.	Pubmed	0.0005557	1	0.0322	0.3873	2	2	PTGS1,PTGS2
Pubmed	15328521	RNA profiling of cyclooxygenases 1 and 2 in colorectal cancer.	Pubmed	0.0005557	1	0.0322	0.3873	2	2	PTGS1,PTGS2
Pubmed	29206857	Z-disc protein CHAPb induces cardiomyopathy and contractile dysfunction in the postnatal heart.	Pubmed	0.0005557	1	0.0322	0.3873	2	2	SYNPO2L,ACTN2
Pubmed	19706769	Identification of a protein, G0S2, that lacks Bcl-2 homology domains and interacts with and antagonizes Bcl-2.	Pubmed	0.0005557	1	0.0322	0.3873	2	2	BCL2,G0S2
Pubmed	25422234	Overexpression of phospholipase A2 Group IIA in esophageal squamous cell carcinoma and association with cyclooxygenase-2 expression.	Pubmed	0.0005557	1	0.0322	0.3873	2	2	PLA2G2A,PTGS2
Pubmed	17692272	LOC387715/HTRA1 variants in polypoidal choroidal vasculopathy and age-related macular degeneration in a Japanese population.	Pubmed	0.0005557	1	0.0322	0.3873	2	2	ARMS2,HTRA1
Pubmed	23433353	The association of IL-6 and IL-6R gene polymorphisms with chronic periodontitis in a Chinese population.	Pubmed	0.0005557	1	0.0322	0.3873	2	2	IL6,IL6R
Pubmed	27405496	Polymorphisms in complement genes and risk of preeclampsia in Taiyuan, China.	Pubmed	0.0005557	1	0.0322	0.3873	2	2	C6,MASP1
Pubmed	11178107	Genetic modification of glaucoma associated phenotypes between AKXD-28/Ty and DBA/2J mice.	Pubmed	0.0005557	1	0.0322	0.3873	2	2	GPNMB,TYRP1
Pubmed	26703471	Different Fatty Acids Compete with Arachidonic Acid for Binding to the Allosteric or Catalytic Subunits of Cyclooxygenases to Regulate Prostanoid Synthesis.	Pubmed	0.0005557	1	0.0322	0.3873	2	2	PTGS1,PTGS2
Pubmed	26937016	Application of q-Space Diffusion MRI for the Visualization of White Matter.	Pubmed	0.0005557	1	0.0322	0.3873	2	2	MBP,PLP1
Pubmed	30309760	Borderline hemoglobin A	Pubmed	0.0005557	1	0.0322	0.3873	2	2	HBA2,HBB
Pubmed	21301321	The influence of cyclooxygenase-1 expression on the efficacy of cyclooxygenase-2 inhibition in head and neck squamous cell carcinoma cell lines.	Pubmed	0.0005557	1	0.0322	0.3873	2	2	PTGS1,PTGS2
Pubmed	11832369	COX-2 inhibition attenuates anorexia during systemic inflammation without impairing cytokine production.	Pubmed	0.0005557	1	0.0322	0.3873	2	2	PTGS1,PTGS2
Pubmed	23874970	LC-MS/MS confirms that COX-1 drives vascular prostacyclin whilst gene expression pattern reveals non-vascular sites of COX-2 expression.	Pubmed	0.0005557	1	0.0322	0.3873	2	2	PTGS1,PTGS2
Pubmed	21041550	The identification of a novel locus for mandibular prognathism in the Han Chinese population.	Pubmed	0.0005557	1	0.0322	0.3873	2	2	TGFB3,LTBP2
Pubmed	23280549	Growth differentiation factor-15 (GDF-15) suppresses in vitro angiogenesis through a novel interaction with connective tissue growth factor (CCN2).	Pubmed	0.0005557	1	0.0322	0.3873	2	2	GDF15,CCN2
Pubmed	18049479	Rap1 is involved in the signal transduction of myelin-associated glycoprotein.	Pubmed	0.0005557	1	0.0322	0.3873	2	2	NGFR,RAP1GAP
Pubmed	19048389	Gadd45-alpha and Gadd45-gamma utilize p38 and JNK signaling pathways to induce cell cycle G2/M arrest in Hep-G2 hepatoma cells.	Pubmed	0.0005557	1	0.0322	0.3873	2	2	GADD45G,GADD45A
Pubmed	19245215	Subunit-selective interrogation of CO recombination in carbonmonoxy hemoglobin by isotope-edited time-resolved resonance Raman spectroscopy.	Pubmed	0.0005557	1	0.0322	0.3873	2	2	HBA2,HBB
Pubmed	18459455	Analysis of renal immunoexpression of cyclooxygenase-1 and cyclooxygenase-2 in lupus and nonlupus membranous glomerulopathy.	Pubmed	0.0005557	1	0.0322	0.3873	2	2	PTGS1,PTGS2
Pubmed	15190260	Cyclooxygenase-1, but not -2, is upregulated in NB4 leukemic cells and human primary promyelocytic blasts during differentiation.	Pubmed	0.0005557	1	0.0322	0.3873	2	2	PTGS1,PTGS2
Pubmed	14691480	Gadd45beta is important for perpetuating cognate and inflammatory signals in T cells.	Pubmed	0.0005557	1	0.0322	0.3873	2	2	GADD45B,GADD45G
Pubmed	20585394	Transforming growth factor beta 2 and heme oxygenase 1 genes are risk factors for the cerebral malaria syndrome in Angolan children.	Pubmed	0.0005557	1	0.0322	0.3873	2	2	TGFB2,HMOX1
Pubmed	24268780	The circadian molecular clock regulates adult hippocampal neurogenesis by controlling the timing of cell-cycle entry and exit.	Pubmed	0.0005557	1	0.0322	0.3873	2	2	ARNTL,PER2
Pubmed	18657230	Cyclooxygenase in normal human tissues--is COX-1 really a constitutive isoform, and COX-2 an inducible isoform?	Pubmed	0.0005557	1	0.0322	0.3873	2	2	PTGS1,PTGS2
Pubmed	20967564	The expression of TGF-?3 for epithelial-mesenchyme transdifferentiated MEE in palatogenesis.	Pubmed	0.0005557	1	0.0322	0.3873	2	2	TGFB3,TGFBR3
Pubmed	18772366	Role of cyclooxygenase isoforms in prostacyclin biosynthesis and murine prehepatic portal hypertension.	Pubmed	0.0005557	1	0.0322	0.3873	2	2	PTGS1,PTGS2
Pubmed	31100639	Critical role of the MCAM-ETV4 axis triggered by extracellular S100A8/A9 in breast cancer aggressiveness.	Pubmed	0.0005557	1	0.0322	0.3873	2	2	MCAM,ETV4
Pubmed	25339000	Co-expression of putative cancer stem cell markers, CD133 and Nestin, in skin tumors.	Pubmed	0.0005557	1	0.0322	0.3873	2	2	NES,PROM1
Pubmed	26782593	Association of phosphodiesterase 4D gene and interleukin-6 receptor gene polymorphisms with ischemic stroke in a Chinese hypertensive population.	Pubmed	0.0005557	1	0.0322	0.3873	2	2	PDE4D,IL6R
Pubmed	10841517	Host cyclooxygenase-2 modulates carcinoma growth.	Pubmed	0.0005557	1	0.0322	0.3873	2	2	PTGS1,PTGS2
Pubmed	30169526	Control of Listeria monocytogenes infection requires classical IL-6 signaling in myeloid cells.	Pubmed	0.0005557	1	0.0322	0.3873	2	2	IL6,IL6R
Pubmed	19056642	Polymorphisms cyclooxygenase-2 -765G>C and interleukin-6 -174G>C are associated with serum inflammation markers in a high cardiovascular risk population and do not modify the response to a Mediterranean diet supplemented with virgin olive oil or nuts.	Pubmed	0.0005557	1	0.0322	0.3873	2	2	IL6,PTGS2
Pubmed	10944235	Coordinated regulation of fetal and maternal prostaglandins directs successful birth and postnatal adaptation in the mouse.	Pubmed	0.0005557	1	0.0322	0.3873	2	2	PTGS1,PTGS2
Pubmed	22248664	CCL2-induced migration and SOCS3-mediated activation of macrophages are involved in cerulein-induced pancreatitis in mice.	Pubmed	0.0005557	1	0.0322	0.3873	2	2	CCL2,SOCS3
Pubmed	21519345	IL-6 promotes acute and chronic inflammatory disease in the absence of SOCS3.	Pubmed	0.0005557	1	0.0322	0.3873	2	2	SOCS3,IL6
Pubmed	16140261	Coupling between cyclooxygenases and terminal prostanoid synthases.	Pubmed	0.0005557	1	0.0322	0.3873	2	2	PTGS1,PTGS2
Pubmed	20483735	Differences in wound healing in mice with deficiency of IL-6 versus IL-6 receptor.	Pubmed	0.0005557	1	0.0322	0.3873	2	2	IL6,IL6R
Pubmed	30538005	Evidence for a protective role for the rs805305 single nucleotide polymorphism of dimethylarginine dimethylaminohydrolase 2 (DDAH2) in septic shock through the regulation of DDAH activity.	Pubmed	0.0005557	1	0.0322	0.3873	2	2	DDAH2,DDAH1
Pubmed	17130490	Altered monocyte cyclooxygenase response to lipopolysaccharide in type 1 diabetes.	Pubmed	0.0005557	1	0.0322	0.3873	2	2	PTGS1,PTGS2
Pubmed	29263216	The STAT3-IL-10-IL-6 Pathway Is a Novel Regulator of Macrophage Efferocytosis and Phenotypic Conversion in Sterile Liver Injury.	Pubmed	0.0005557	1	0.0322	0.3873	2	2	GPNMB,IL6
Pubmed	23810565	Platelet-derived nucleotides promote tumor-cell transendothelial migration and metastasis via P2Y2 receptor.	Pubmed	0.0005557	1	0.0322	0.3873	2	2	UNC13D,P2RY2
Pubmed	17484618	Influence of apolipoprotein E polymorphism on serum lipid and lipoprotein changes: a 21-year follow-up study from childhood to adulthood. The Cardiovascular Risk in Young Finns Study.	Pubmed	0.0005557	1	0.0322	0.3873	2	2	APOB,APOE
Pubmed	18439298	Overexpression of Scg5 increases enzymatic activity of PCSK2 and is inversely correlated with body weight in congenic mice.	Pubmed	0.0005557	1	0.0322	0.3873	2	2	SCG5,SOCS2
Pubmed	29180445	Flipping the cyclooxygenase (	Pubmed	0.0005557	1	0.0322	0.3873	2	2	PTGS1,PTGS2
Pubmed	19420105	A candidate gene approach to genetic prognostic factors of IgA nephropathy--a result of Polymorphism REsearch to DIstinguish genetic factors Contributing To progression of IgA Nephropathy (PREDICT-IgAN).	Pubmed	0.0005567	1	0.03224	0.3877	8	80	ADH1B,CCL2,SELE,APOE,NPPA,THBS4,IL6,CYP2J2
Pubmed	22923088	The doublesex homolog Dmrt5 is required for the development of the caudomedial cerebral cortex in mammals.	Pubmed	0.0005886	1	0.03406	0.4097	7	62	DMRTA1,BMP7,NGFR,CUX2,RELN,RORB,LEF1
Pubmed	25979088	Defects During Mecp2 Null Embryonic Cortex Development Precede the Onset of Overt Neurological Symptoms.	Pubmed	0.000591	1	0.03416	0.4108	6	45	NES,CAMK2B,GRIA3,GRIN2A,GRM1,RELN
Pubmed	15172686	Identification of kidney mesenchymal genes by a combination of microarray analysis and Sall1-GFP knockin mice.	Pubmed	0.000591	1	0.03416	0.4108	6	45	ETV4,C1QTNF3,SMARCD3,SMTNL2,FIBIN,CRYM
Pubmed	30713523	Plasticity in the Glucagon Interactome Reveals Novel Proteins That Regulate Glucagon Secretion in ?-TC1-6 Cells.	Pubmed	0.0005946	1	0.03434	0.4131	14	216	MAP2,ACTA1,FASN,H2BC21,SLC25A5,NES,H2AW,GRIA3,TFRC,HMGN2,UBB,HSPA2,STMN1,LDHA
Pubmed	19409883	The transcriptional repressor RP58 is crucial for cell-division patterning and neuronal survival in the developing cortex.	Pubmed	0.0005969	1	0.03441	0.4139	5	30	MAP2,SNCA,CCN2,RELN,RORB
Pubmed	20890042	Integration of a Notch-dependent mesenchymal gene program and Bmp2-driven cell invasiveness regulates murine cardiac valve formation.	Pubmed	0.0005969	1	0.03441	0.4139	5	30	MYL2,NPPA,TGFB2,HEY2,MYL7
Pubmed	30635284	CDK5RAP3, a UFL1 substrate adaptor, is crucial for liver development.	Pubmed	0.0005969	1	0.03441	0.4139	5	30	CCND1,DLK1,BCL2,PPP1R15A,KRT19
Pubmed	28071719	Quantitative proteomic profiling of the extracellular matrix of pancreatic islets during the angiogenic switch and insulinoma progression.	Pubmed	0.0006188	1	0.03566	0.4289	11	145	F13A1,S100A6,MFAP2,BGN,COL22A1,COL16A1,RELN,ASPN,LTBP1,LTBP2,LUM
Pubmed	17954558	The alpha catalytic subunit of protein kinase CK2 is required for mouse embryonic development.	Pubmed	0.0006471	1	0.03655	0.4396	3	8	MYL2,NPPA,MYL7
Pubmed	20888482	Serum lipid biomarkers and hepatic lipase gene associations with age-related macular degeneration.	Pubmed	0.0006471	1	0.03655	0.4396	3	8	ARMS2,C3,HTRA1
Pubmed	12837627	Gli2 is required for normal Shh signaling and oligodendrocyte development in the spinal cord.	Pubmed	0.0006471	1	0.03655	0.4396	3	8	MBP,PDGFRA,PLP1
Pubmed	1353738	A genetic map of the mouse suitable for typing intraspecific crosses.	Pubmed	0.0006471	1	0.03655	0.4396	3	8	MBP,ODC1,PLP1
Pubmed	18768805	Expression of liver X receptor beta is essential for formation of superficial cortical layers and migration of later-born neurons.	Pubmed	0.0006471	1	0.03655	0.4396	3	8	MAP2,NES,RELN
Pubmed	15265030	Distribution of the lipolysis stimulated receptor in adult and embryonic murine tissues and lethality of LSR-/- embryos at 12.5 to 14.5 days of gestation.	Pubmed	0.0006471	1	0.03655	0.4396	3	8	APOB,APOE,UBB
Pubmed	3052276	Molecular organization and function of the complement system.	Pubmed	0.0006471	1	0.03655	0.4396	3	8	C3,C6,C7
Pubmed	28827343	Involvement of posttranscriptional regulation of Clock in the emergence of circadian clock oscillation during mouse development.	Pubmed	0.0006471	1	0.03655	0.4396	3	8	ARNTL,PER2,DBP
Pubmed	7555018	The multiple functions of hemoglobin.	Pubmed	0.0006471	1	0.03655	0.4396	3	8	HBA1,HBA2,HBB
Pubmed	18498113	The role of transforming growth factor-beta signalling in the patterning of the proximal processes of the murine dentary.	Pubmed	0.0006471	1	0.03655	0.4396	3	8	RUNX2,TGFB2,TGFB3
Pubmed	14701732	Direct association between mouse PERIOD and CKIepsilon is critical for a functioning circadian clock.	Pubmed	0.0006471	1	0.03655	0.4396	3	8	ARNTL,PER3,PER2
Pubmed	24737000	Machine learning helps identify CHRONO as a circadian clock component.	Pubmed	0.0006471	1	0.03655	0.4396	3	8	ARNTL,PER2,CIART
Pubmed	19039769	The elimination of Anaplasma phagocytophilum requires CD4+ T cells, but is independent of Th1 cytokines and a wide spectrum of effector mechanisms.	Pubmed	0.0006471	1	0.03655	0.4396	3	8	CCL2,CTSG,ELANE
Pubmed	18256599	Haematopoietic stem cell release is regulated by circadian oscillations.	Pubmed	0.0006471	1	0.03655	0.4396	3	8	SELE,ARNTL,PER2
Pubmed	12644183	Biochemical and recessive visible specific locus responses of C3H/HeH to fractionated, acute radiation.	Pubmed	0.0006471	1	0.03655	0.4396	3	8	ASIP,BMP5,TYRP1
Pubmed	16544732	Candidate gene polymorphism in cardiovascular disease: the BIP cohort.	Pubmed	0.0006471	1	0.03655	0.4396	3	8	SELE,APOB,APOE
Pubmed	11208532	Differential expression of KvLQT1 and its regulator IsK in mouse epithelia.	Pubmed	0.0006471	1	0.03655	0.4396	3	8	ATP2A2,MYL2,MYL7
Pubmed	12826663	Implications of nectin-like molecule-2/IGSF4/RA175/SgIGSF/TSLC1/SynCAM1 in cell-cell adhesion and transmembrane protein localization in epithelial cells.	Pubmed	0.0006471	1	0.03655	0.4396	3	8	MPP6,CADM3,NECTIN1
Pubmed	16336945	Gli3 mutation rescues the generation, but not the differentiation, of oligodendrocytes in Shh mutants.	Pubmed	0.0006471	1	0.03655	0.4396	3	8	MBP,PDGFRA,PLP1
Pubmed	18515089	p75 Neurotrophin receptor is a marker for precursors of stellate cells and portal fibroblasts in mouse fetal liver.	Pubmed	0.0006471	1	0.03655	0.4396	3	8	DLK1,LYVE1,NGFR
Pubmed	27135601	Long-Range Chromosome Interactions Mediated by Cohesin Shape Circadian Gene Expression.	Pubmed	0.0006471	1	0.03655	0.4396	3	8	ARNTL,PER3,DBP
Pubmed	23725765	Atrial identity is determined by a COUP-TFII regulatory network.	Pubmed	0.0006471	1	0.03655	0.4396	3	8	MYL2,HEY2,MYL7
Pubmed	7819129	Transforming growth factors beta 1, beta 2, and beta 3 messenger RNA and protein expression in mouse uterus and vagina during estrogen-induced growth: a comparison to other estrogen-regulated genes.	Pubmed	0.0006471	1	0.03655	0.4396	3	8	TGFA,TGFB2,TGFB3
Pubmed	9500550	Heart and extra-embryonic mesodermal defects in mouse embryos lacking the bHLH transcription factor Hand1.	Pubmed	0.0006471	1	0.03655	0.4396	3	8	MYL2,NPPA,MYL7
Pubmed	17113632	Cytokine gene variants and venous thrombotic risk in the BRATROS (BRAZILIAN THROMBOSIS STUDY).	Pubmed	0.0006471	1	0.03655	0.4396	3	8	F5,IL1RN,IL6
Pubmed	19710684	Multiple pigmentation gene polymorphisms account for a substantial proportion of risk of cutaneous malignant melanoma.	Pubmed	0.0006471	1	0.03655	0.4396	3	8	SLC24A4,ASIP,TYRP1
Pubmed	15680351	Mouse hesr1 and hesr2 genes are redundantly required to mediate Notch signaling in the developing cardiovascular system.	Pubmed	0.0006471	1	0.03655	0.4396	3	8	MYL2,HEY2,MYL7
Pubmed	7819439	Analysis of the expression of growth factor, interleukin-1, and lactoferrin genes and the distribution of inflammatory leukocytes in the preimplantation mouse oviduct.	Pubmed	0.0006471	1	0.03655	0.4396	3	8	TGFA,TGFB2,TGFB3
Pubmed	28069589	Analysis of the Fgfr2(C342Y) mouse model shows condensation defects due to misregulation of Sox9 expression in prechondrocytic mesenchyme.	Pubmed	0.0006471	1	0.03655	0.4396	3	8	FGF10,FGF12,RUNX2
Pubmed	8163463	Transmembrane topology of the glutamate receptor subunit GluR6.	Pubmed	0.0006471	1	0.03655	0.4396	3	8	GRIK2,GRIK3,GRIN2A
Pubmed	24736997	A novel protein, CHRONO, functions as a core component of the mammalian circadian clock.	Pubmed	0.0006471	1	0.03655	0.4396	3	8	ARNTL,PER2,CIART
Pubmed	17036337	Risks of human limb deficiency anomalies associated with 29 SNPs of genes involved in homocysteine metabolism, coagulation, cell-cell interactions, inflammatory response, and blood pressure regulation.	Pubmed	0.0006471	1	0.03655	0.4396	3	8	SELE,GNB3,NPPA
Pubmed	14975714	Essential roles of Meltrin beta (ADAM19) in heart development.	Pubmed	0.0006471	1	0.03655	0.4396	3	8	ERBB3,ADAM19,LTBP1
Pubmed	19460752	A genome-wide short hairpin RNA screening of jurkat T-cells for human proteins contributing to productive HIV-1 replication.	Pubmed	0.000651	1	0.03675	0.442	14	218	ADCY1,FGF7,SFRP4,INPP5F,ARNTL,RACGAP1,CORIN,ATP5ME,RGS11,CAPN3,DMC1,ZNF277,CPT1A,GPA33
Pubmed	18974842	Gender differences in genetic risk profiles for cardiovascular disease.	Pubmed	0.0006664	1	0.03759	0.4521	6	46	F2R,F5,F13A1,SELE,APOE,IL6
Pubmed	20453000	A Large-scale genetic association study of esophageal adenocarcinoma risk.	Pubmed	0.0006672	1	0.03761	0.4524	19	351	FGFR4,IL17RB,BIRC3,RGS11,CCND1,BCL2,ABCC8,TGFA,PDGFRA,ABCB1,XPA,RGS6,CCN2,IL1RN,IL6,IL6R,IL10RA,PTGS1,PTGS2
Pubmed	28111199	Pericytes of Multiple Organs Do Not Behave as Mesenchymal Stem Cells In Vivo.	Pubmed	0.0006906	1	0.03877	0.4663	4	18	MCAM,ACTN2,PDGFRA,HCN4
Pubmed	20463618	Role of polymorphic variants as genetic modulators of infection in neonatal sepsis.	Pubmed	0.0006906	1	0.03877	0.4663	4	18	PLA2G2A,IL1RN,IL6,IL10RA
Pubmed	23575864	Sox10 cooperates with the mediator subunit 12 during terminal differentiation of myelinating glia.	Pubmed	0.0006906	1	0.03877	0.4663	4	18	MBP,MED12L,PDGFRA,PLP1
Pubmed	27180262	Misexpression of Tbx18 in cardiac chambers of fetal mice interferes with chamber-specific developmental programs but does not induce a pacemaker-like gene signature.	Pubmed	0.0006906	1	0.03877	0.4663	4	18	MYL2,NPPA,TNNI3,HCN4
Pubmed	17913789	Divergent roles of ApoER2 and Vldlr in the migration of cortical neurons.	Pubmed	0.0006906	1	0.03877	0.4663	4	18	NES,CUX2,RELN,RORB
Pubmed	20174623	Systematic analysis of circadian genes in a population-based sample reveals association of TIMELESS with depression and sleep disturbance.	Pubmed	0.0006906	1	0.03877	0.4663	4	18	ARNTL,PER3,PER2,DBP
Pubmed	15363409	Foxh1 is essential for development of the anterior heart field.	Pubmed	0.0006906	1	0.03877	0.4663	4	18	FGF10,MYH6,MYL2,NPPA
Pubmed	19344414	Risk of non-Hodgkin lymphoma in association with germline variation in complement genes.	Pubmed	0.0006981	1	0.03908	0.47	5	31	C3,C6,C7,CLU,CFD
Pubmed	9169087	Developmental expression of morphoregulatory genes in the mouse embryo: an analytical approach using a novel technology.	Pubmed	0.0006981	1	0.03908	0.47	5	31	BCL2,NGFR,TGFA,TGFB2,TGFB3
Pubmed	20691427	Genetic associations of brain structural networks in schizophrenia: a preliminary study.	Pubmed	0.0006981	1	0.03908	0.47	5	31	FASN,SELE,APOB,GNB3,WWC1
Pubmed	27416896	Regulation of PERK-eIF2? signalling by tuberous sclerosis complex-1 controls homoeostasis and survival of myelinating oligodendrocytes.	Pubmed	0.0006981	1	0.03908	0.47	5	31	MBP,FASN,PDGFRA,PPP1R15A,PLP1
[truncated: 7,889 more rows]

## Sheet: Supplementary Table 6C
Category	ID	Name	Source	p-value	q-value Bonferroni	q-value FDR B&H	q-value FDR B&Y	Hit Count in Query List	Hit Count in Genome	Hit in Query List
[truncated: 12,220 more rows]
